# Supplementary material for: A Practical and Analytical Comparative Study of Gel-Based Top-Down and Gel-Free Bottom-Up Proteomics Including Unbiased Proteoform Detection
Source: Cells. 2023 Feb 26;12(5):747. doi: 10.3390/cells12050747 (PMC10000902; doi:10.3390/cells12050747)
Supplement: Supplementary file 1 [file cells-12-00747-s001.zip]

Archive with 5 entries (5 files):
- Supplementary Materials Ercan et al.pdf
- Table S1_All identified proteins of 2DDIGE and shotgun.xlsx
- Table S2_PKM2 with 2DDIGE and shotgun.xlsx
- Table S3_MaxQuant result tables for selected proteins.xlsx
- Table S4_Phosphatase.xlsx
