# Supplementary material for: A Practical and Analytical Comparative Study of Gel-Based Top-Down and Gel-Free Bottom-Up Proteomics Including Unbiased Proteoform Detection
Source: Cells. 2023 Feb 26;12(5):747. doi: 10.3390/cells12050747 (PMC10000902; doi:10.3390/cells12050747)
Supplement: Supplementary file 1 [file cells-12-00747-s001.zip › Table S1_All identified proteins of 2DDIGE and shotgun.xlsx]

## Sheet: Supplementary Table 1
										2D-DIGE				Label-free shotgun		2D-DIGE	Label-free shotgun
Masternumber	Accession number (Uniprot)	Gene name	Protein name	Identified by MS or 2D-WB	pH range	practical - Isoelectric point (pI)	theoretical pI (Uniprot)	practical - MW [kDa]	theoretical - MW [kDa] (Uniprot)	Technical Variation CVtech (%)	Technical Variation 2D spot sum CVtech (%)	Total Variation CVtotal (%)	Total Variation 2D spot sum CVtotal (%)	Technical Variation CVtech (%)	Total Variation CVtotal (%)	Spot Size	LFQ-Intensitiy
2593	P0DP23	CALM1	Calmodulin-1	2D-WB	pH 4-7	3.66	4.08698	14.048	16.837	3.87226	33.0227	12.9181	34.175	15	54.9767	9.65582	218110164
2516	P0DP23	CALM1	Calmodulin-1	MS	pH 4-7	4.09		16.838		62.1732		55.4319				38.8126
1601	Q01105	SET	Protein SET	MS	pH 4-7	3.73	4.21932	44.229	32.103	5.99811	5.99811	10.3451	10.3451	18.1814	60.7074	18.7168	1.09603e+07
2419	Q15185	PTGES3	Prostaglandin E synthase 3	MS	pH 4-7	3.79	4.31898	20.804	19.155	3.76634	5.08383	8.55656	9.19683	33.7104	67.6337	18.4219	2.35717e+07
2420	Q15185	PTGES3	Prostaglandin E synthase 3	2D-WB	pH 4-7	3.87		20.804		6.40132		9.8371				5.51513
2579	P60660	MYL6	Myosin light polypeptide 6	MS	pH 4-7	4.03	4.56	14.642	16.93	10.1228	10.1228	9.80335	9.80335	24.5357	53.9185	33.5911	25244500
1430	O43852	CALU	Calumenin	MS	pH 4-7	4.04	4.47	49.671	37.106	2.56976	5.08887	20.2664	16.0259	12.5249	70.6268	6.1639	2810600
1400	O43852	CALU	Calumenin	MS	pH 4-7	4.1		49.877		9.83163		12.6264				6.89728
1419	O43852	CALU	Calumenin	MS	pH 4-7	4.15		49.62		2.86522		15.1848				7.85228
2432	P63208	SKP1	S-phase kinase-associated protein 1	MS	pH 4-7	4.2	4.399	20.209	18.658	6.9526	6.9526	23.0991	23.0991	21.6942	46.4256	3.85883	1084527
2085	P24534	EEF1B2	Elongation factor 1-beta	MS	pH 4-7	4.27	4.5	31.454	24.763	9.53853	9.53853	4.82586	4.82586	29.0127	58.0233	38.9003	4780017
763	P27797	CALR	Calreticulin	MS	pH 4-7	4.29	4.29	48.141	48.141	4.38937	4.38937	7.34468	7.34468	15.5682	68.1576	52.4387	9.72622e+06
1946	P12004	PCNA	Proliferating cell nuclear antigen	MS	pH 4-7	4.46	4.57318	36.026	28.768	4.72825	4.72825	5.77855	5.77855	21.5416	53.5464	16.5253	5.66663e+06
1481	P08670	VIM	Vimentin	MS	pH 4-7	4.56	5.05245	47.655	53.651	6.04303	4.10876	10.8296	14.8162	6.42919	37.7952	5.74126	287851675
1479	P08670	VIM	Vimentin	MS	pH 4-7	4.64		47.704		4.73686		26.1056				7.36844
1296	P08670	VIM	Vimentin	MS	pH 4-7	5.02		52.638		1.54638		7.51349				9.36982
2210	P31946	YWHAB	14-3-3 protein beta/alpha	MS	pH 4-7	4.68	4.76427	28.008	27.85	2.57152	2.57152	5.33615	5.33615	19.8299	50.8244	53.5543	1.18907e+07
2157	P61981	YWHAG	14-3-3 protein gamma	MS	pH 4-7	4.7	4.8005	29.102	28.302	4.53156	4.53156	1.81098	1.81098	18.813	44.3632	25.4317	3.2758e+06
1555	P08865	RPSA	40S ribosomal protein SA	MS	pH 4-7	4.75	4.79	45.484	29.404	3.42408	3.42408	9.46548	9.46548	14.9166	60.0933	32.5396	2.50623e+07
1058	P07237	P4HB	Protein disulfide-isomerase	MS	pH 4-7	4.72	4.76	58.324	57.116	3.28424	4.52874	3.67803	5.48927	8.90566	63.1729	12.6796	63695001
1065	P07237	P4HB	Protein disulfide-isomerase	MS	pH 4-7	4.76		57.116		2.45467		5.00107				146.97
973	P07237	P4HB	Protein disulfide-isomerase	MS	pH 4-7	4.78		59.545		8.81052		9.60748				5.91517
1073	P07237	P4HB	Protein disulfide-isomerase	MS	pH 4-7	4.84		58.022		3.56552		3.67049				19.3621
1384	P09104	ENO2	Gamma-enolase	MS	pH 4-7	5.01	4.90804	50.033	47.268	5.87968	5.87968	9.05096	9.05096	48.6971	95.9897	5.541	2.02092e+06
684	P11021	HSPA5	Endoplasmic reticulum chaperone BiP	MS	pH 4-7	5.07	5.07	72.332	72.332	1.02738	1.02738	8.56514	8.56514	18.7447	48.6679	50.478	4.92263e+07
1258	P06576	ATP5F1B	ATP synthase subunit beta; mitochondrial	MS	pH 4-7	5.27	5.25582	53.407	56.559	4.92861	4.92861	20.1052	20.1052	18.2335	55.5936	63.731	3.26662e+07
2051	Q99426	TBCB	Tubulin-folding cofactor B	MS	pH 4-7	5.27	5.056	32.751	27.325	4.17999	4.17999	11.1791	11.1791	16.3798	54.5203	11.0175	1.75638e+06
2287	P09936	UCHL1	Ubiquitin carboxyl-terminal hydrolase isozyme L1	MS	pH 4-7	5.33	5.33	24.824	24.824	6.0199	6.0199	5.987	5.987	15.679	61.2394	133.642	8.23452e+07
2046	Q96C19	EFHD2	EF-hand domain-containing protein D2	MS	pH 4-7	5.37	5.1495	32.649	26.697	4.48943	4.48943	13.8992	13.8992	14.0108	51.5648	19.8941	1.42907e+07
2528	P63241	EIF5A	Eukaryotic translation initiation factor 5A-1	MS	pH 4-7	5.41	5.07	16.564	16.832	4.93485	4.93485	5.46067	5.46067	14.9352	66.469	78.8958	3.88067e+07
2050	Q15691	MAPRE1	Microtubule-assoicated protein RP/EB family member 1	MS	pH 4-7	5.42	5.02158	32.447	29.999	2.60039	2.60039	3.88648	3.88648	16.6589	51.0886	22.0669	2.66668e+06
2226	P07858	CTSB	Cathepsin B	2D-WB	pH 4-7	5.43	5.88	27.777	37.821	1.48975	7.67464	11.7919	10.1158	23.4295	39.5885	7.91209	1219708
2284	P07858	CTSB	Cathepsin B	MS	pH 4-7	5.53		26.076		14.4394		5.07934				3.43493
2249	P07858	CTSB	Cathepsin B	MS	pH 4-7	5.54		26.982		7.09474		13.4761				5.63422
2295	P09936	UCHL1	Ubiqutin carboxyl-terminal hydrolase isozyme L1	MS	pH 4-7	5.46	5.33	25.488	24.824	9.18546	9.18546	7.14269	7.14269	15.679	61.2394	3.46234	8.23452e+07
2084	O00299	CLIC1	Chloride intracellular channel protein 1	MS	pH 4-7	5.49	5.09	31.291	26.922	4.76567	4.76567	13.426	13.426	16.2739	60.1236	58.1711	2.53182e+07
1460	O60664	PLIN3	Perilipin-3	MS	pH 4-7	5.5	5.3	47.902	47.074	5.57488	5.57488	17.6671	17.6671	31.6012	55.5877	5.00372	6.8445e+06
2130	O43399	TPD52L2	Tumor protein D54	MS	pH 4-7	5.5	5.2578	30.052	22.237	6.26734	6.26734	6.91248	6.91248	32.8703	45.6218	7.42268	4.49387e+06
1958	Q15181	PPA1	Inorganic pyrophosphatase	MS	pH 4-7	5.54	5.53962	32.66	32.66	3.21504	3.21504	6.49525	6.49525	35.728	71.5213	31.376	3.23608e+06
2202	P43487	RANBP1	Ran-specific GTPase-activating protein	MS	pH 4-7	5.55	5.19	28.183	23.239	8.71745	8.71745	14.6181	14.6181	24.8863	66.9067	29.7415	1.01179e+07
1887	P07195	LDHB	L-lactate dehydrogenase B chain	MS	pH 4-7	5.71	5.71127	36.638	36.638	3.79367	3.79367	11.482	11.482	8.86371	61.3745	84.1087	45607666
2118	P07339	CTSD	Cathepsin D	MS	pH 4-7	5.76	6.1	30.397	43.688	3.06977	2.46277	6.36493	21.237	17.3917	60.7264	5.21618	5884650
2176	P07339	CTSD	Cathepsin D	MS	pH 4-7	5.97		28.802		1.85578		36.1091				24.0515
460	Q14247	CTTN	Src substrate cortactin	MS	pH 4-7	5.78	5.24	75.411	61.585	4.89793	4.89793	4.99943	4.99943	13.6047	57.3173	7.85143	7.01833e+06
1031	P14618	PKM2	Pyruvate kinase PKM2	MS	pH 4-7	5.8	7.96	59.299	57.936	4.63533	6.27362	4.62341	15.0852	27.2764	66.0197	11.2924	22507667
1059	P14618	PKM2	Pyruvate kinase PKM2	MS	pH 4-7	6.08		58.263		3.73791		5.25974				17.7839
1202	P14618	PKM2	Pyruvate kinase PKM2	MS	pH 6-9	7.75		57.715		8.15089		19.7236				38.7268
1240	P14618	PKM2	Pyruvate kinase PKM2	MS	pH 6-9	7.8		56.91		7.11949		42.1573				14.6279
1214	P14618	PKM2	Pyruvate kinase PKM2	MS	pH 6-9	7.96		57.936		7.85776		17.8561				391.303
1215	P14618	PKM2	Pyruvate kinase PKM2	MS	pH 6-9	8.2		57.369		5.58203		4.03443				9.28627
1959	P14618	PKM2	Pyruvate kinase PKM2	2D-WB	pH 6-9	7.32		42.341		6.83191		11.9421				104.839
1445	P60842	EIF4A1	Eukaryotic initiation factor 4A-I	MS	pH 4-7	5.81	5.32	48.552	46.153	2.98261	2.85205	13.1471	11.8127	10.96	48.7483	80.5872	41301834
1468	P60842	EIF4A1	Eukaryotic initiation factor 4A-I	MS	pH 4-7	5.9		47.803		2.7215		10.4784				69.9808
758	P11142	HSPA8	Heat shock cognate 71 kDa protein	MS	pH 4-7	5.82	5.36829	66.595	70.897	1.55051	1.55051	13.7666	13.7666	10.4783	52.8013	115.728	1.04868e+08
752	P38646	HSPA9	Stress-70 protein; mitochondrial	MS	pH 4-7	5.87	5.86988	73.68	73.68	3.90049	3.90049	8.51139	8.51139	20.999	52.5798	139.943	3.56853e+07
815	P0DMV8	HSPA1A	Heat shock 70 kDa protein 1A	MS	pH 4-7	5.93	5.47	64.892	70.108	12.1436	12.1436	9.87289	9.87289	61.2873	64.3356	4.83764	12359900
1143	Q02790	FKBP4	Peptidyl-prolyl cis-trans isomerase FKBP4	MS	pH 4-7	5.98	5.34864	56.247	51.804	3.82239	3.82239	16.6691	16.6691	28.7674	89.1993	15.2991	2166750
1797	P52907	CAPZA1	F-actin-capping protein subunit alpha-1	MS	pH 4-7	6.02	5.44616	39.424	32.922	6.00223	6.00223	6.66838	6.66838	18.4439	55.3536	16.5241	2.95513e+06
1428	P31930	UQCRC1	Cytochrome b-c1 complex subunit 1, mitochondrial	MS	pH 4-7	6.16	5.93749	49.312	52.645	6.22211	6.22211	16.9406	16.9406	23.5034	64.6877	8.83701	2.18887e+06
3221	P23528	CFL1	Cofilin-1	MS	pH 6-9	6.24	8.22	18.988	18.502	8.33623	5.73661	19.9294	15.1102	17.9735	67.2945	26.5372	93078167
3591	P23528	CFL1	Cofilin-1	MS	pH 6-9	8.1		18.223		3.23444		15.0112				130.937
2477	P23528	CFL1	Cofilin-1	MS	pH 4-7	8.22		18.502		5.63916		10.3899				49.3507
1820	P37837	TALDO1	Transaldolase	2D-WB	pH 4-7	6.33	6.35598	39.058	37.54	2.26359	4.60423	16.3061	15.8648	15.0065	51.1041	9.6935	14659166
1866	P37837	TALDO1	Transaldolase	MS	pH 4-7	6.82		38.02		4.14576		14.4085				19.1255
1802	P37837	TALDO1	Transaldolase	MS	pH 4-7	7.32		39.221		7.40333		16.8797				20.2718
1670	Q9UNM6	PSMD13	26Sproteasome non-ATPase regulatory subunit 13	MS	pH 4-7	6.42	6.06001	42.654	42.945	5.23428	5.23428	12.1787	12.1787	22.8635	57.3434	9.74299	1.76812e+06
2121	P04083	ANXA1	Annexin A1	MS	pH 6-9	6.47	6.57	39.196	38.714	1.31355	5.83716	6.02431	5.79639	19.1462	53.3085	45.2687	46642667
2085	P04083	ANXA1	Annexin A1	MS	pH 6-9	6.57		38.714		10.3608		5.56847				30.5154
1643	P05455	SSB	Lupus La protein	MS	pH 6-9	6.47	6.67577	48.428	46.836	4.06463	4.06463	4.6927	4.6927	20.9904	84.9066	12.9959	915450
1001	Q13177	PAK2	Serine/threonine-protein kinase PAK 2	MS	pH 4-7	6.47	5.69482	59.73	58.042	2.81422	2.81422	10.1883	10.1883	26.1212	51.25	5.92497	1325865
2034	P09525	ANXA4	Annexin A4	MS	pH 4-7	6.51	5.82801	33.092	35.882	2.22782	2.22782	12.7228	12.7228	15.6316	45.2629	20.2567	8.04498e+06
1128	P30101	PDIA3	Protein disulfide-isomerase A3	MS	pH 4-7	6.52	5.98342	56.598	56.782	2.0141	2.0141	8.85667	8.85667	9.84455	61.9107	109.969	2.46192e+07
711	P41250	GARS1	Glycine--tRNA ligase	MS	pH 4-7	6.61	6.60784	83.165	83.165	4.03615	4.03615	7.21412	7.21412	19.9439	67.8196	12.1881	4.25953e+06
2538	Q9NQR4	NIT2	Omega-amidase NIT2	MS	pH 6-9	6.66	6.83	31.883	30.608	4.20921	4.20921	32.6443	32.6443	32.1409	62.938	2.75702	443255
2754	P18669	PGAM1	Phosphoglycerate mutase 1	MS	pH 6-9	6.67	6.67	28.803	28.804	4.12424	4.12424	9.01657	9.01657	20.1658	73.4725	51.1323	1.6582e+07
1791	P62140	PPP1CB	Serine/threonine-protein phosphatase PP1-beta catalytic subunit	MS	pH 4-7	6.79	5.84307	39.465	37.186	9.87165	9.87165	7.10882	7.10882	15.7325	67.641	17.9907	534148
1772	Q14103	HNRNPD	Heterogeneous nuclear ribonucleoprotein D0	MS	pH 6-9	6.82	7.14	45.969	32.834	5.37658	5.37658	9.12942	9.12942	21.5588	61.9042	34.0825	8.78442e+06
1340	Q01518	CAP1	Adenylyl cyclase-associated protein 1	MS	pH 6-9	6.83	8.23544	54.893	51.901	3.93685	5.8658	19.2939	12.932	21.2982	47.8476	6.17642	18092833
1345	Q01518	CAP1	Adenylyl cyclase-associated protein 1	MS	pH 6-9	7.38		54.783		4.4193		11.165				21.4432
1331	Q01518	CAP1	Adenylyl cyclase-associated protein 1	2D-WB	pH 6-9	6.95		55.059		7.80013		8.37384				10.8806
1307	Q01518	CAP1	Adenylyl cyclase-associated protein 1	2D-WB	pH 6-9	7.14		55.502		5.50692		17.1277				7.95609
1336	Q01518	CAP1	Adenylyl cyclase-associated protein 1	2D-WB	pH 6-9	7.66		55.059		7.66579		8.69943				3.66529
981	P17987	TCP1	T-complex protein 1 subunit alpha	MS	pH 4-7	6.83	5.8	60.352	60.343	7.16974	7.16974	14.8521	14.8521	10.4994	58.4417	21.1887	1.80928e+07
2189	P15121	AKR1B1	Aldo-keto reductase family 1 member B1	MS	pH 6-9	6.84	6.52	37.883	35.853	3.00823	3.00823	18.0204	18.0204	25.8961	59.3687	17.065	15589000
2848	P60174	TPI1	Triosephosphate isomerase	MS	pH 6-9	6.94	6.44581	26.592	26.669	6.36141	6.36141	15.5698	15.5698	21.5581	67.606	81.8366	1.92422e+07
1786	P62136	PPP1CA	Serine/threonine-protein phosphatase PP1-alpha catalytic subunit	MS	pH 4-7	6.96	5.93973	39.588	37.512	5.0583	5.0583	12.5188	12.5188	8.05199	66.1189	18.8252	5.68297e+07
2269	P04792	HSPB1	Heat shock protein beta-1	MS	pH 4-7	7.01	5.98	26.539	22.782	10.3269	10.3269	11.8761	11.8761	27.1971	61.474	2.33387	3.29973e+06
1913	O00487	PSMD14	26S proteasome non-ATPase regulatory subunit 14	MS	pH 4-7	7.17	6.06001	37.01	34.577	8.77271	8.77271	13.0382	13.0382	25.7327	61.8587	5.24199	9.69638e+06
1631	P06733	ENO1	Alpha-enolase	MS	pH 6-9	7.18	7.01	48.721	47.168	4.68766	4.68766	6.37506	6.37506	27.7807	63.0204	35.938	1.39338e+06
2064	Q13011	ECH1	Delta(3,5)-Delta(2,4)-dienoyl-CoA isomerase, mitochondrial	MS	pH 4-7	7.29	8.15981	32.246	35.816	5.54888	5.54888	17.338	17.338	69.8192	55.8688	10.7612	375678336
2765	P62826	RAN	GTP-binding nuclear protein Ran	MS	pH 6-9	7.29	7.00956	27.597	24.423	2.36067	2.36067	4.25082	4.25082	8.64642	82.3876	79.0451	2.95668e+06
1632	Q15019	SEPTIN2	Septin-2	MS	pH 4-7	7.44	6.14599	43.773	41.487	7.95926	7.95926	12.6967	12.6967	33	76.9843	4.06662	4.84455e+07
2355	P45880	VDAC2	Voltage-dependent anion-selective channel protein 2	MS	pH 6-9	7.5	7.5	31.566	31.566	3.15624	3.15624	9.85258	9.85258	17.9075	68.1214	54.4471	2.98032e+07
669	Q99798	ACO2	Aconitate hydratase, mitochondrial	MS	pH 6-9	7.52	7.36	70.457	87.819	7.55693	7.55693	25.5125	25.5125	21.0526	65.5398	8.58984	2030900
1994	P11766	ADH5	Alcohol dehydrogenase class-3	MS	pH 6-9	7.53	7.4509	41.626	39.724	7.56392	7.56392	9.57355	9.57355	69.7287	62.1662	16.1567	1.40628e+07
2218	P07355	ANXA2	Annexin A2	MS	pH 6-9	7.53	7.57	37.58	38.604	6.58334	7.11387	12.6106	18.7431	13.4005	48.6162	2.56711	250855003
2152	P07355	ANXA2	Annexin A2	MS	pH 6-9	7.57		38.604		7.64441		24.8755				4.25694
2696	P25789	PSMA4	Proteasome subunit alpha type-4	MS	pH 6-9	7.58	7.581	29.074	29.483	5.00075	5.00075	4.41389	4.41389	24.9656	62.7197	14.357	2.19243e+08
952	P29401	TKT	Transketolase	MS	pH 6-9	7.58	7.57897	67.577	67.877	4.60254	4.60254	10.2299	10.2299	22.0332	69.4805	18.481	6.13532e+06
1942	Q9Y617	PSAT1	Phosphoserine aminotransferase	MS	pH 6-9	7.59	7.55985	42.341	40.422	4.47836	4.47836	10.8706	10.8706	31.5541	53.2286	20.9676	5.2908e+07
1272	Q99832	CCT7	T-complex protein 1 subunit eta	MS	pH 6-9	7.6	6.37	56.286	59.366	6.26321	6.26321	12.6154	12.6154	19.0102	61.9607	26.9433	1.38345e+07
1735	P31942	HNRNPH3	Heterogeneous nuclear ribonucleoprotein H3	MS	pH 4-7	7.89	6.37	41.05	35.238	3.84475	3.84475	13.0748	13.0748	30.2161	57.7161	15.498	16009000
754	Q15637	SF1	Splicing factor 1	MS	pH 6-9	7.99	9.0738	68.096	59.711	7.17651	7.17651	9.71277	9.71277	19.0102	55.1632	2.5771	2.99863e+06
1850	P04075	ALDOA	Fructose-bisphosphate aldolase A	MS	pH 6-9	8.14	8.3	44.339	39.42	8.24871	6.97994	9.66083	9.50468	17.548	61.9625	55.6793	181471667
1881	P04075	ALDOA	Fructose-bisphosphate aldolase A	MS	pH 6-9	8.46		43.285		5.71118		9.34853				36.0069
3362	P62937	PPIA	Peptidyl-prolyl cis-trans isomerase A	MS	pH 6-9	8.17	7.68055	16.045	18.012	4.94369	4.94369	6.19033	6.19033	40.3203	64.3289	100.707	7.36693e+07
2649	P17931	LGALS3	Galectin-3	MS	pH 6-9	8.25	8.58	29.633	26.152	2.04419	2.04419	33.0234	33.0234	27.6012	70.9632	2.01522	1396485
2224	P30084	ECHS1	Enoyl-CoA hydratase; mitochondrial	MS	pH 4-7	8.34	8.34	31.387	31.387	4.39952	4.39952	11.1771	11.1771	18.8833	86.4323	26.316	1.991e+06
3012	Q06830	PRDX1	Peroxiredoxin-1	MS	pH 6-9	8.35	8.27239	23.39	22.11	5.85176	5.85176	8.04766	8.04766	26.5931	59.5409	101.05	6.76868e+07
3065	P37802	TAGLN2	Transgelin-2	MS	pH 6-9	8.41	8.40858	22.391	22.391	6.99559	6.99559	24.1962	24.1962	11.8803	49.4664	74.3806	3.67818e+07
2312	P00338	LDHA	L-lactate dehydrogenase A chain	MS	pH 6-9	8.43	8.44	35.85	36.688	3.71607	3.71607	1.57885	1.57885	8.86944	73.1484	96.5793	1.26192e+08
3333	P22392	NME2	Nucleoside diphosphate kinase B	MS	pH 6-9	8.52	8.51849	17.286	32.642	9.46023	9.46023	16.7583	16.7583	23.1853	59.8268	53.1879	2.98548e+07
3598	Q14914	PTGR1	Prostaglandin reductase 1	MS	pH 6-9	8.55	8.4	39.078	32.895	18.8479	18.8479	29.9906	29.9906	20.1755	57.1993	3598	3.72063e+06
2139	P04406	GAPDH	Glyceraldehyde-3-phosphate dehydrogenase	MS	pH 6-9	8.68	8.57	39.078	36.053	9.05414	5.56718	32.5408	20.6436	13.9343	53.5533	62.8358	191046667
3597	P04406	GAPDH	Glyceraldehyde-3-phosphate dehydrogenase	MS	pH 6-9	8.78		39.039		7.71535		25.1313				626.349
2134	P04406	GAPDH	Glyceraldehyde-3-phosphate dehydrogenase	2D-WB	pH 6-9	8.88		39.078		4.67527		30.8167				55.4513
2141	P04406	GAPDH	Glyceraldehyde-3-phosphate dehydrogenase	2D-WB	pH 6-9	9.01		39		3.05577		5.27689				12.9701
2147	P04406	GAPDH	Glyceraldehyde-3-phosphate dehydrogenase	MS	pH 6-9	9.21		38.844		3.33538		9.45223				5.59719
1701	Q9Y6N5	SQOR	Sulfide:quinone oxidoreductase; mitochondria	MS	pH 6-9	9.35	9.18	47.372	49.96	2.83939	2.83939	6.3495	6.3495	18.1342	46.7087	2.16692	3.11173e+06
