# Supplementary material for: A Practical and Analytical Comparative Study of Gel-Based Top-Down and Gel-Free Bottom-Up Proteomics Including Unbiased Proteoform Detection
Source: Cells. 2023 Feb 26;12(5):747. doi: 10.3390/cells12050747 (PMC10000902; doi:10.3390/cells12050747)
Supplement: Supplementary file 1 [file cells-12-00747-s001.zip › Table S2_PKM2 with 2DDIGE and shotgun.xlsx]

## Sheet: 01-2D-DIGE MS PKM2
SPOT: 13							Pyruvate kinase PKM OS=Homo sapiens OX=9606 GN=PKM PE=1 SV=4
Accession:							KPYM_HUMAN														Score:						1067.44
Database:							SwissProt														MW [kDa]:						57.9
Seq. Coverage [%]:							0.529														pI:						7.95506
																					No. of Peptides:						31
Cmpd.		m/z meas.	z	Rt [min]		Score					P	Range					Sequence
3586		599.323	2	32.5724		27					0	33-43					R.LDIDSPPITAR.N
3632		599.324	2	32.8406		27.01					0	33-43					R.LDIDSPPITAR.N
3654		599.324	2	32.9568		27.93					0	33-43					R.LDIDSPPITAR.N
3615		599.323	2	32.7271		34.84					0	33-43					R.LDIDSPPITAR.N
3600		599.323	2	32.6321		37.92					0	33-43					R.LDIDSPPITAR.N
3606		599.322	2	32.6802		48.39					0	33-43					R.LDIDSPPITAR.N
3622		599.323	2	32.7734		59.96					0	33-43					R.LDIDSPPITAR.N
3026		680.352	2	29.3244		39.31					0	44-56					R.NTGIICTIGPASR.S
3076		680.352	2	29.53		41.06					0	44-56					R.NTGIICTIGPASR.S
3056		680.353	2	29.4378		42					0	44-56					R.NTGIICTIGPASR.S
3038		680.351	2	29.3729		57.02					0	44-56					R.NTGIICTIGPASR.S
1144		597.32	2	19.3774		19.48					1	57-66					R.SVETLKEMIK.S
4208		785.887	2	36.4937		15.1					0	93-106					R.TATESFASDPILYR.P
5768		822.43	3	45.2364		20.31					1	93-115					R.TATESFASDPILYRPVAVALDTK.G
5779		822.432	3	45.2963		30					1	93-115					R.TATESFASDPILYRPVAVALDTK.G
5809		822.431	3	45.4368		39.08					1	93-115					R.TATESFASDPILYRPVAVALDTK.G
5800		822.432	3	45.3902		43.14					1	93-115					R.TATESFASDPILYRPVAVALDTK.G
5787		822.432	3	45.3376		48.36					1	93-115					R.TATESFASDPILYRPVAVALDTK.G
446		531.346	1	14.4011		16.49					0	121-125					R.TGLIK.G
449		531.345	1	14.4166		16.57					0	121-125					R.TGLIK.G
454		531.348	1	14.4553		19.23					0	121-125					R.TGLIK.G
445		531.347	1	14.3885		21.45					0	121-125					R.TGLIK.G
906		495.755	2	17.9426		25.21					0	126-135					K.GSGTAEVELK.K
899		495.756	2	17.896		25.91					0	126-135					K.GSGTAEVELK.K
441		559.801	2	14.3508		24.01					1	126-136					K.GSGTAEVELKK.G
437		559.801	2	14.3299		24.26					1	126-136					K.GSGTAEVELKK.G
2989		599.29	2	29.1493		21.33					0	142-151					K.ITLDNAYMEK.C
5739		731.911	2	45.0276		15.19					0	174-186					K.IYVDDGLISLQVK.Q
5724		731.907	2	44.9598		15.96					0	174-186					K.IYVDDGLISLQVK.Q
5665		731.907	2	44.6073		20.02					0	174-186					K.IYVDDGLISLQVK.Q
5659		731.907	2	44.5745		21.51					0	174-186					K.IYVDDGLISLQVK.Q
5697		731.907	2	44.7719		45.68					0	174-186					K.IYVDDGLISLQVK.Q
5688		731.906	2	44.7263		48.57					0	174-186					K.IYVDDGLISLQVK.Q
5675		731.906	2	44.6443		49.22					0	174-186					K.IYVDDGLISLQVK.Q
5466		890.929	2	43.5127		15.7					0	189-206					K.GADFLVTEVENGGSLGSK.K
5222		890.438	2	42.2851		27.23					0	189-206					K.GADFLVTEVENGGSLGSK.K
5266		890.93	2	42.5168		27.55					0	189-206					K.GADFLVTEVENGGSLGSK.K
5179		890.437	2	42.0561		28.48					0	189-206					K.GADFLVTEVENGGSLGSK.K
5205		890.437	2	42.2239		32.15					0	189-206					K.GADFLVTEVENGGSLGSK.K
5017		890.929	2	41.192		50.15					0	189-206					K.GADFLVTEVENGGSLGSK.K
5428		890.935	2	43.3426		50.73					0	189-206					K.GADFLVTEVENGGSLGSK.K
5193		890.44	2	42.1417		52.11					0	189-206					K.GADFLVTEVENGGSLGSK.K
5063		890.932	2	41.4172		52.12					0	189-206					K.GADFLVTEVENGGSLGSK.K
5010		890.929	2	41.1586		54.86					0	189-206					K.GADFLVTEVENGGSLGSK.K
5030		890.93	2	41.2426		55.14					0	189-206					K.GADFLVTEVENGGSLGSK.K
3900		588.997	3	34.5847		20					1	207-224					K.KGVNLPGAAVDLPAVSEK.D
3913		588.995	3	34.6697		21.5					1	207-224					K.KGVNLPGAAVDLPAVSEK.D
3898		588.999	3	34.5677		23.3					1	207-224					K.KGVNLPGAAVDLPAVSEK.D
3924		588.996	3	34.7281		28.4					1	207-224					K.KGVNLPGAAVDLPAVSEK.D
4926		818.948	2	40.5916		15.52					0	208-224					K.GVNLPGAAVDLPAVSEK.D
4968		818.942	2	40.8657		20.93					0	208-224					K.GVNLPGAAVDLPAVSEK.D
4962		818.946	2	40.8372		21.41					0	208-224					K.GVNLPGAAVDLPAVSEK.D
4932		818.944	2	40.6228		23.19					0	208-224					K.GVNLPGAAVDLPAVSEK.D
4956		818.947	2	40.7988		23.31					0	208-224					K.GVNLPGAAVDLPAVSEK.D
4948		818.946	2	40.7411		38.82					0	208-224					K.GVNLPGAAVDLPAVSEK.D
4941		818.945	2	40.7026		41					0	208-224					K.GVNLPGAAVDLPAVSEK.D
4936		818.944	2	40.6562		42.92					0	208-224					K.GVNLPGAAVDLPAVSEK.D
4938		818.944	2	40.6822		47.52					0	208-224					K.GVNLPGAAVDLPAVSEK.D
5698		783.756	3	44.7739		18.49					1	208-230					K.GVNLPGAAVDLPAVSEKDIQDLK.F
1066		731.391	1	18.9142		23.97					0	225-230					K.DIQDLK.F
224		477.24	2	10.344		15.58					0	271-278					K.IENHEGVR.R
223		477.241	2	10.3313		29.54					0	271-278					K.IENHEGVR.R
4557		613.305	3	38.4707		15.67					1	279-294					R.RFDEILEASDGIMVAR.G
4539		613.307	3	38.3854		31.15					1	279-294					R.RFDEILEASDGIMVAR.G
4521		613.304	3	38.3149		40.29					1	279-294					R.RFDEILEASDGIMVAR.G
5224		607.973	3	42.289		40.3					1	279-294					R.RFDEILEASDGIMVAR.G
5207		607.971	3	42.2281		40.36					1	279-294					R.RFDEILEASDGIMVAR.G
5247		607.972	3	42.4081		51.73					1	279-294					R.RFDEILEASDGIMVAR.G
5231		607.972	3	42.3311		61.76					1	279-294					R.RFDEILEASDGIMVAR.G
5791		833.406	2	45.3462		31.36					0	280-294					R.FDEILEASDGIMVAR.G
3835		571.304	2	34.213		21.12					0	295-305					R.GDLGIEIPAEK.V
3826		571.304	2	34.1662		28.85					0	295-305					R.GDLGIEIPAEK.V
965		705.426	1	18.329		35.21					0	306-311					K.VFLAQK.M
959		705.425	1	18.3016		40.6					0	306-311					K.VFLAQK.M
7019		1247.58	2	52.1001		38					0	343-367					R.AEGSDVANAVLDGADCIMLSGETAK.G
7034		1247.58	2	52.1808		47.9					0	343-367					R.AEGSDVANAVLDGADCIMLSGETAK.G
2700		510.257	2	27.635		23.76					0	368-376					K.GDYPLEAVR.M
2660		510.257	2	27.3939		25					0	368-376					K.GDYPLEAVR.M
2668		510.257	2	27.4641		27.71					0	368-376					K.GDYPLEAVR.M
2680		510.258	2	27.5252		35.27					0	368-376					K.GDYPLEAVR.M
330		442.739	2	12.7783		15.9					0	377-383					R.MQHLIAR.E
334		442.739	2	12.8126		21.85					0	377-383					R.MQHLIAR.E
502		434.742	2	14.9265		22.37					0	377-383					R.MQHLIAR.E
335		442.738	2	12.825		25.49					0	377-383					R.MQHLIAR.E
512		434.741	2	15.0224		28.05					0	377-383					R.MQHLIAR.E
507		434.741	2	14.9765		39.99					0	377-383					R.MQHLIAR.E
338		442.739	2	12.8622		41.74					0	377-383					R.MQHLIAR.E
5958		644.662	3	46.2628		28.6					0	384-399					R.EAEAAIYHLQLFEELR.R
5970		644.663	3	46.3395		51.33					0	384-399					R.EAEAAIYHLQLFEELR.R
4992		696.695	3	41.044		16.26					1	384-400					R.EAEAAIYHLQLFEELRR.L
5009		696.697	3	41.1462		17.04					1	384-400					R.EAEAAIYHLQLFEELRR.L
4991		696.696	3	41.031		19.89					1	384-400					R.EAEAAIYHLQLFEELRR.L
5001		696.696	3	41.1083		41.54					1	384-400					R.EAEAAIYHLQLFEELRR.L
6145		1088.06	2	47.3986		21.08					0	401-422					R.LAPITSDPTEATAVGAVEASFK.C
6153		1088.06	2	47.4379		43.82					0	401-422					R.LAPITSDPTEATAVGAVEASFK.C
6159		1088.06	2	47.4592		86.65					0	401-422					R.LAPITSDPTEATAVGAVEASFK.C
1969		420.765	2	24.1705		22.13					0	448-455					R.APIIAVTR.N
1965		420.765	2	24.1496		41.02					0	448-455					R.APIIAVTR.N
5550		821.886	2	43.9574		17.73					0	476-489					K.DPVQEAWAEDVDLR.V
5570		821.884	2	44.0353		19.75					0	476-489					K.DPVQEAWAEDVDLR.V
SPOT: 14							Pyruvate kinase PKM OS=Homo sapiens OX=9606 GN=PKM PE=1 SV=4
Accession:							KPYM_HUMAN														Score:						929.638
Database:							SwissProt														MW [kDa]:						57.9
Seq. Coverage [%]:							0.567														pI:						7.95506
																					No. of Peptides:						30
Cmpd.		m/z meas.	z	Rt [min]		Score					P	Range					Sequence
4159		599.326	2	32.894		27.13					0	33-43					R.LDIDSPPITAR.N
4171		599.326	2	32.9483		32.33					0	33-43					R.LDIDSPPITAR.N
4203		599.326	2	33.0985		33.11					0	33-43					R.LDIDSPPITAR.N
4191		599.325	2	33.0448		40.8					0	33-43					R.LDIDSPPITAR.N
4146		599.326	2	32.8425		44.77					0	33-43					R.LDIDSPPITAR.N
4182		599.327	2	32.9974		60.99					0	33-43					R.LDIDSPPITAR.N
3584		680.355	2	30.0195		32.13					0	44-56					R.NTGIICTIGPASR.S
3558		680.353	2	29.8972		38.3					0	44-56					R.NTGIICTIGPASR.S
6643		822.433	3	46.0362		15.38					1	93-115					R.TATESFASDPILYRPVAVALDTK.G
6600		822.436	3	45.8491		34.92					1	93-115					R.TATESFASDPILYRPVAVALDTK.G
6612		822.434	3	45.8989		37.16					1	93-115					R.TATESFASDPILYRPVAVALDTK.G
671		531.349	1	14.6105		15.03					0	121-125					R.TGLIK.G
668		531.349	1	14.5893		24.98					0	121-125					R.TGLIK.G
678		559.807	2	14.649		22.37					1	126-136					K.GSGTAEVELKK.G
661		559.805	2	14.5116		34.05					1	126-136					K.GSGTAEVELKK.G
664		559.805	2	14.5488		36.05					1	126-136					K.GSGTAEVELKK.G
672		559.804	2	14.6121		44.43					1	126-136					K.GSGTAEVELKK.G
662		559.805	2	14.5243		44.84					1	126-136					K.GSGTAEVELKK.G
663		559.805	2	14.5367		46.71					1	126-136					K.GSGTAEVELKK.G
3488		599.293	2	29.5942		19.57					0	142-151					K.ITLDNAYMEK.C
2618		607.29	2	25.432		34.47					0	142-151					K.ITLDNAYMEK.C
6443		731.909	2	45.095		19.21					0	174-186					K.IYVDDGLISLQVK.Q
6423		731.91	2	45.0113		21.07					0	174-186					K.IYVDDGLISLQVK.Q
6478		731.911	2	45.2628		33.58					0	174-186					K.IYVDDGLISLQVK.Q
6463		731.913	2	45.1903		35.04					0	174-186					K.IYVDDGLISLQVK.Q
5816		890.93	2	41.9069		15.19					0	189-206					K.GADFLVTEVENGGSLGSK.K
5761		890.931	2	41.6172		24.44					0	189-206					K.GADFLVTEVENGGSLGSK.K
5780		890.933	2	41.7328		37.32					0	189-206					K.GADFLVTEVENGGSLGSK.K
5789		890.932	2	41.7694		43.06					0	189-206					K.GADFLVTEVENGGSLGSK.K
5963		890.436	2	42.6799		45.69					0	189-206					K.GADFLVTEVENGGSLGSK.K
5953		890.442	2	42.6356		45.94					0	189-206					K.GADFLVTEVENGGSLGSK.K
5775		890.933	2	41.7044		50.08					0	189-206					K.GADFLVTEVENGGSLGSK.K
5801		890.93	2	41.8401		50.54					0	189-206					K.GADFLVTEVENGGSLGSK.K
4494		588.997	3	34.7569		15.9					1	207-224					K.KGVNLPGAAVDLPAVSEK.D
4492		588.998	3	34.7395		18.13					1	207-224					K.KGVNLPGAAVDLPAVSEK.D
4502		588.997	3	34.8		28.06					1	207-224					K.KGVNLPGAAVDLPAVSEK.D
5646		818.947	2	41.0834		31.43					0	208-224					K.GVNLPGAAVDLPAVSEK.D
5635		818.943	2	41.042		31.52					0	208-224					K.GVNLPGAAVDLPAVSEK.D
5675		818.948	2	41.1973		57.86					0	208-224					K.GVNLPGAAVDLPAVSEK.D
1372		731.39	1	19.1562		18.3					0	225-230					K.DIQDLK.F
1420		731.394	1	19.398		19.35					0	225-230					K.DIQDLK.F
1393		731.392	1	19.257		19.59					0	225-230					K.DIQDLK.F
1411		731.39	1	19.3559		20.81					0	225-230					K.DIQDLK.F
1366		731.39	1	19.1212		27.97					0	225-230					K.DIQDLK.F
9300		938.449	2	59.1043		31.93					0	231-246					K.FGVEQDVDMVFASFIR.K
9269		938.446	2	59.0064		38.49					0	231-246					K.FGVEQDVDMVFASFIR.K
270		520.777	2	9.96964		25.47					1	247-255					R.KASDVHEVR.K
269		520.775	2	9.95669		47.44					1	247-255					R.KASDVHEVR.K
268		520.776	2	9.94367		48.02					1	247-255					R.KASDVHEVR.K
303		477.241	2	10.5834		15.49					0	271-278					K.IENHEGVR.R
306		477.241	2	10.5973		23.24					0	271-278					K.IENHEGVR.R
5241		613.306	3	39.027		26.08					1	279-294					R.RFDEILEASDGIMVAR.G
5984		607.977	3	42.7662		27.26					1	279-294					R.RFDEILEASDGIMVAR.G
5249		613.306	3	39.0503		29.6					1	279-294					R.RFDEILEASDGIMVAR.G
5996		607.977	3	42.8146		55.69					1	279-294					R.RFDEILEASDGIMVAR.G
4412		571.306	2	34.293		25.79					0	295-305					R.GDLGIEIPAEK.V
4426		571.306	2	34.3708		32.69					0	295-305					R.GDLGIEIPAEK.V
1271		705.429	1	18.5319		21.4					0	306-311					K.VFLAQK.M
1258		705.428	1	18.4431		21.96					0	306-311					K.VFLAQK.M
1249		705.425	1	18.3937		23.49					0	306-311					K.VFLAQK.M
1253		705.429	1	18.4165		29.6					0	306-311					K.VFLAQK.M
1053		607.305	1	17.152		15.36					0	312-316					K.MMIGR.C
7921		1247.58	2	52.4771		43.31					0	343-367					R.AEGSDVANAVLDGADCIMLSGETAK.G
7911		1247.57	2	52.427		45.11					0	343-367					R.AEGSDVANAVLDGADCIMLSGETAK.G
3103		510.261	2	27.7441		26.81					0	368-376					K.GDYPLEAVR.M
490		442.74	2	13.2357		17.13					0	377-383					R.MQHLIAR.E
756		434.744	2	15.2448		24.72					0	377-383					R.MQHLIAR.E
483		442.74	2	13.1703		26.27					0	377-383					R.MQHLIAR.E
753		434.744	2	15.2237		30.39					0	377-383					R.MQHLIAR.E
6797		644.666	3	46.7918		15.1					0	384-399					R.EAEAAIYHLQLFEELR.R
6789		644.666	3	46.7458		20.36					0	384-399					R.EAEAAIYHLQLFEELR.R
5753		696.697	3	41.5683		19.8					1	384-400					R.EAEAAIYHLQLFEELRR.L
5749		696.698	3	41.5405		29.83					1	384-400					R.EAEAAIYHLQLFEELRR.L
7067		1088.06	2	48.1926		26.45					0	401-422					R.LAPITSDPTEATAVGAVEASFK.C
7013		1088.06	2	47.9371		29.9					0	401-422					R.LAPITSDPTEATAVGAVEASFK.C
7019		1088.06	2	47.9716		41.92					0	401-422					R.LAPITSDPTEATAVGAVEASFK.C
7051		1088.06	2	48.1371		48.02					0	401-422					R.LAPITSDPTEATAVGAVEASFK.C
2415		420.767	2	24.5832		26.67					0	448-455					R.APIIAVTR.N
6323		821.887	2	44.4543		21.64					0	476-489					K.DPVQEAWAEDVDLR.V
6331		821.888	2	44.4922		23.09					0	476-489					K.DPVQEAWAEDVDLR.V
SPOT: 16							Pyruvate kinase PKM OS=Homo sapiens OX=9606 GN=PKM PE=1 SV=4
Accession:							KPYM_HUMAN														Score:						194.539
Database:							SwissProt														MW [kDa]:						57.9
Seq. Coverage [%]:							0.087														pI:						7.95506
																					No. of Peptides:						7
Cmpd.		m/z meas.	z	Rt [min]		Score					P	Range					Sequence
335		676.387	1	14.3219		19.53					0	57-62					R.SVETLK.E
329		676.392	1	14.2535		19.77					0	57-62					R.SVETLK.E
332		676.391	1	14.2835		20.71					0	57-62					R.SVETLK.E
330		676.386	1	14.2663		21.5					0	57-62					R.SVETLK.E
333		676.388	1	14.2963		27.52					0	57-62					R.SVETLK.E
366		531.354	1	15.3003		16.85					0	121-125					R.TGLIK.G
361		531.352	1	15.2664		17.63					0	121-125					R.TGLIK.G
386		559.81	2	15.4839		16.63					1	126-136					K.GSGTAEVELKK.G
385		559.81	2	15.4712		18.75					1	126-136					K.GSGTAEVELKK.G
384		559.81	2	15.4586		31.69					1	126-136					K.GSGTAEVELKK.G
363		559.809	2	15.2952		33.62					1	126-136					K.GSGTAEVELKK.G
367		559.809	2	15.3171		37.07					1	126-136					K.GSGTAEVELKK.G
368		559.81	2	15.3272		40.32					1	126-136					K.GSGTAEVELKK.G
374		559.81	2	15.3632		41.2					1	126-136					K.GSGTAEVELKK.G
382		559.811	2	15.4346		45.51					1	126-136					K.GSGTAEVELKK.G
377		559.81	2	15.3924		56.9					1	126-136					K.GSGTAEVELKK.G
224		520.78	2	9.83026		25.15					1	247-255					R.KASDVHEVR.K
225		520.783	2	9.84324		26.15					1	247-255					R.KASDVHEVR.K
240		477.248	2	10.6238		20.07					0	271-278					K.IENHEGVR.R
238		477.247	2	10.5987		37.72					0	271-278					K.IENHEGVR.R
314		442.746	2	14.0562		15.82					0	377-383					R.MQHLIAR.E
318		442.746	2	14.1029		16.22					0	377-383					R.MQHLIAR.E
422		434.749	2	16.0199		16.95					0	377-383					R.MQHLIAR.E
301		442.745	2	13.9507		17.04					0	377-383					R.MQHLIAR.E
302		442.745	2	13.9629		19.08					0	377-383					R.MQHLIAR.E
306		442.745	2	13.9848		23.4					0	377-383					R.MQHLIAR.E
310		442.746	2	14.0254		27.59					0	377-383					R.MQHLIAR.E
315		442.745	2	14.0671		29.43					0	377-383					R.MQHLIAR.E
SPOT: 18							Pyruvate kinase PKM OS=Homo sapiens OX=9606 GN=PKM PE=1 SV=4
Accession:							KPYM_HUMAN														Score:						4369.1
Database:							SwissProt														MW [kDa]:						57.9
Seq. Coverage [%]:							0.917														pI:						7.95506
																					No. of Peptides:						117
Cmpd.		m/z meas.	z	Rt [min]		Score					P	Range					Sequence
6000		917.654	4	38.2097		30.78					1	2-32					M.SKPHSEAGTAFIQTQQLHAAMADTFLEHMCR.L
6018		893.667	4	38.3043		38.92					1	2-32					M.SKPHSEAGTAFIQTQQLHAAMADTFLEHMCR.L
5142		897.666	4	34.2089		39.94					1	2-32					M.SKPHSEAGTAFIQTQQLHAAMADTFLEHMCR.L
6086		893.667	4	38.5835		47.36					1	2-32					M.SKPHSEAGTAFIQTQQLHAAMADTFLEHMCR.L
5184		897.667	4	34.4107		56.57					1	2-32					M.SKPHSEAGTAFIQTQQLHAAMADTFLEHMCR.L
5192		897.667	4	34.4265		65.31					1	2-32					M.SKPHSEAGTAFIQTQQLHAAMADTFLEHMCR.L
5154		897.666	4	34.2602		78.96					1	2-32					M.SKPHSEAGTAFIQTQQLHAAMADTFLEHMCR.L
5174		897.667	4	34.3598		97.24					1	2-32					M.SKPHSEAGTAFIQTQQLHAAMADTFLEHMCR.L
6057		893.668	4	38.4667		112.31					1	2-32					M.SKPHSEAGTAFIQTQQLHAAMADTFLEHMCR.L
6065		893.668	4	38.5134		113.32					1	2-32					M.SKPHSEAGTAFIQTQQLHAAMADTFLEHMCR.L
6038		893.668	4	38.3689		135.01					1	2-32					M.SKPHSEAGTAFIQTQQLHAAMADTFLEHMCR.L
5152		718.335	5	34.2575		19.2					1	2-32					M.SKPHSEAGTAFIQTQQLHAAMADTFLEHMCR.L
5193		718.335	5	34.4271		19.83					1	2-32					M.SKPHSEAGTAFIQTQQLHAAMADTFLEHMCR.L
5132		718.335	5	34.1617		21.28					1	2-32					M.SKPHSEAGTAFIQTQQLHAAMADTFLEHMCR.L
6087		715.137	5	38.5842		26.75					1	2-32					M.SKPHSEAGTAFIQTQQLHAAMADTFLEHMCR.L
6067		715.136	5	38.5176		37.46					1	2-32					M.SKPHSEAGTAFIQTQQLHAAMADTFLEHMCR.L
5164		718.336	5	34.3089		44.49					1	2-32					M.SKPHSEAGTAFIQTQQLHAAMADTFLEHMCR.L
6019		715.136	5	38.305		53.26					1	2-32					M.SKPHSEAGTAFIQTQQLHAAMADTFLEHMCR.L
5175		718.335	5	34.3618		59.74					1	2-32					M.SKPHSEAGTAFIQTQQLHAAMADTFLEHMCR.L
6039		715.136	5	38.3708		71.16					1	2-32					M.SKPHSEAGTAFIQTQQLHAAMADTFLEHMCR.L
6026		715.136	5	38.3174		98.26					1	2-32					M.SKPHSEAGTAFIQTQQLHAAMADTFLEHMCR.L
6036		829.383	4	38.3651		16.72					0	4-32					K.PHSEAGTAFIQTQQLHAAMADTFLEHMCR.L
5120		833.383	4	34.1093		16.78					0	4-32					K.PHSEAGTAFIQTQQLHAAMADTFLEHMCR.L
5112		833.385	4	34.0633		16.86					0	4-32					K.PHSEAGTAFIQTQQLHAAMADTFLEHMCR.L
5143		833.383	4	34.211		21.47					0	4-32					K.PHSEAGTAFIQTQQLHAAMADTFLEHMCR.L
5138		833.381	4	34.1728		24.14					0	4-32					K.PHSEAGTAFIQTQQLHAAMADTFLEHMCR.L
4796		599.324	2	32.5458		30.7					0	33-43					R.LDIDSPPITAR.N
4831		599.325	2	32.7008		31.75					0	33-43					R.LDIDSPPITAR.N
5195		599.325	2	34.4296		32.35					0	33-43					R.LDIDSPPITAR.N
5003		599.327	2	33.5511		39.52					0	33-43					R.LDIDSPPITAR.N
4818		599.325	2	32.6454		40.2					0	33-43					R.LDIDSPPITAR.N
4992		599.327	2	33.4994		48.7					0	33-43					R.LDIDSPPITAR.N
4807		599.325	2	32.5953		56.61					0	33-43					R.LDIDSPPITAR.N
5025		599.327	2	33.6518		62.04					0	33-43					R.LDIDSPPITAR.N
6896		846.78	3	42.2633		18.6					1	33-56					R.LDIDSPPITARNTGIICTIGPASR.S
5262		680.847	2	34.7702		22.91					0	44-56					R.NTGIICTIGPASR.S
4388		680.356	2	30.6944		24.96					0	44-56					R.NTGIICTIGPASR.S
5758		720.334	2	37.0946		30.85					0	44-56					R.NTGIICTIGPASR.S
4362		680.355	2	30.5879		32.11					0	44-56					R.NTGIICTIGPASR.S
4367		680.355	2	30.5964		34.65					0	44-56					R.NTGIICTIGPASR.S
5921		680.846	2	37.8495		39.13					0	44-56					R.NTGIICTIGPASR.S
4342		680.352	2	30.4893		44					0	44-56					R.NTGIICTIGPASR.S
4351		680.354	2	30.5369		47.44					0	44-56					R.NTGIICTIGPASR.S
5910		680.847	2	37.798		47.99					0	44-56					R.NTGIICTIGPASR.S
4374		680.355	2	30.6405		48.34					0	44-56					R.NTGIICTIGPASR.S
5254		680.857	2	34.7265		48.38					0	44-56					R.NTGIICTIGPASR.S
4415		680.356	2	30.8017		49.98					0	44-56					R.NTGIICTIGPASR.S
4447		680.354	2	30.9441		53.89					0	44-56					R.NTGIICTIGPASR.S
4427		680.356	2	30.8524		81.16					0	44-56					R.NTGIICTIGPASR.S
879		676.389	1	14.0099		17.7					0	57-62					R.SVETLK.E
830		676.387	1	13.7104		23.38					0	57-62					R.SVETLK.E
837		676.387	1	13.7485		26.1					0	57-62					R.SVETLK.E
850		676.386	1	13.8255		27.16					0	57-62					R.SVETLK.E
870		676.386	1	13.9508		28.37					0	57-62					R.SVETLK.E
823		676.387	1	13.6797		29.76					0	57-62					R.SVETLK.E
861		676.384	1	13.8988		31.15					0	57-62					R.SVETLK.E
866		676.387	1	13.9269		31.22					0	57-62					R.SVETLK.E
802		676.387	1	13.545		35.18					0	57-62					R.SVETLK.E
816		676.387	1	13.6371		39.29					0	57-62					R.SVETLK.E
804		676.384	1	13.5608		43.9					0	57-62					R.SVETLK.E
806		676.387	1	13.5739		47.51					0	57-62					R.SVETLK.E
846		676.387	1	13.805		47.85					0	57-62					R.SVETLK.E
842		676.387	1	13.782		47.98					0	57-62					R.SVETLK.E
2205		597.323	2	20.7616		16					1	57-66					R.SVETLKEMIK.S
2101		597.325	2	20.3485		16.39					1	57-66					R.SVETLKEMIK.S
2113		597.325	2	20.3999		24.56					1	57-66					R.SVETLKEMIK.S
2168		597.324	2	20.6055		27.58					1	57-66					R.SVETLKEMIK.S
2135		597.325	2	20.495		32.96					1	57-66					R.SVETLKEMIK.S
5260		629.306	2	34.7662		37.76					1	57-66					R.SVETLKEMIK.S
2156		597.325	2	20.5605		55.36					1	57-66					R.SVETLKEMIK.S
2125		597.325	2	20.4511		67.75					1	57-66					R.SVETLKEMIK.S
673		734.36	1	12.7669		17.54					0	67-73					K.SGMNVAR.L
668		734.359	1	12.7336		19.13					0	67-73					K.SGMNVAR.L
666		734.359	1	12.718		21.27					0	67-73					K.SGMNVAR.L
1932		942.455	2	19.5668		65.07					0	74-89					R.LNFSHGTHEYHAETIK.N
2451		655.29	3	21.9063		18.3					0	74-89					R.LNFSHGTHEYHAETIK.N
2479		655.29	3	22.0148		18.43					0	74-89					R.LNFSHGTHEYHAETIK.N
2545		655.289	3	22.3407		21.76					0	74-89					R.LNFSHGTHEYHAETIK.N
2644		655.291	3	22.76		28.14					0	74-89					R.LNFSHGTHEYHAETIK.N
2469		655.291	3	21.9666		28.83					0	74-89					R.LNFSHGTHEYHAETIK.N
2380		655.29	3	21.5902		36.24					0	74-89					R.LNFSHGTHEYHAETIK.N
2458		655.291	3	21.9467		41.77					0	74-89					R.LNFSHGTHEYHAETIK.N
2578		628.966	3	22.4875		41.94					0	74-89					R.LNFSHGTHEYHAETIK.N
2561		655.29	3	22.3978		48.23					0	74-89					R.LNFSHGTHEYHAETIK.N
1918		628.638	3	19.5167		59.63					0	74-89					R.LNFSHGTHEYHAETIK.N
2630		655.29	3	22.7043		63.59					0	74-89					R.LNFSHGTHEYHAETIK.N
1931		628.64	3	19.5662		67.89					0	74-89					R.LNFSHGTHEYHAETIK.N
1954		628.639	3	19.6695		95.25					0	74-89					R.LNFSHGTHEYHAETIK.N
5781		785.892	2	37.2022		51.89					0	93-106					R.TATESFASDPILYR.P
5787		785.888	2	37.2439		69.66					0	93-106					R.TATESFASDPILYR.P
7731		1233.15	2	46.095		15.75					1	93-115					R.TATESFASDPILYRPVAVALDTK.G
7735		1233.15	2	46.1		44.3					1	93-115					R.TATESFASDPILYRPVAVALDTK.G
7723		1233.15	2	46.0502		63.69					1	93-115					R.TATESFASDPILYRPVAVALDTK.G
7995		822.435	3	47.3563		23.47					1	93-115					R.TATESFASDPILYRPVAVALDTK.G
7539		822.432	3	45.2312		37.87					1	93-115					R.TATESFASDPILYRPVAVALDTK.G
7525		822.429	3	45.1792		48.96					1	93-115					R.TATESFASDPILYRPVAVALDTK.G
7694		822.435	3	45.939		52.46					1	93-115					R.TATESFASDPILYRPVAVALDTK.G
7681		822.434	3	45.8881		52.57					1	93-115					R.TATESFASDPILYRPVAVALDTK.G
7777		822.433	3	46.3045		99.72					1	93-115					R.TATESFASDPILYRPVAVALDTK.G
7756		822.435	3	46.2011		101.64					1	93-115					R.TATESFASDPILYRPVAVALDTK.G
7764		822.435	3	46.2475		124.48					1	93-115					R.TATESFASDPILYRPVAVALDTK.G
7342		1006.53	3	44.3705		15.17					2	93-120					R.TATESFASDPILYRPVAVALDTKGPEIR.T
7332		1006.53	3	44.3209		25.43					2	93-120					R.TATESFASDPILYRPVAVALDTKGPEIR.T
7337		755.15	4	44.3313		17.65					2	93-120					R.TATESFASDPILYRPVAVALDTKGPEIR.T
7346		755.151	4	44.3784		23.01					2	93-120					R.TATESFASDPILYRPVAVALDTKGPEIR.T
2858		913.533	1	23.7387		17.82					0	107-115					R.PVAVALDTK.G
2764		913.535	1	23.3446		38.81					0	107-115					R.PVAVALDTK.G
2772		913.533	1	23.3863		47.66					0	107-115					R.PVAVALDTK.G
2775		457.27	2	23.3902		31.45					0	107-115					R.PVAVALDTK.G
2783		457.271	2	23.4286		48.02					0	107-115					R.PVAVALDTK.G
4108		489.283	3	29.4016		15.41					1	107-120					R.PVAVALDTKGPEIR.T
543		571.317	1	11.4239		18.1					0	116-120					K.GPEIR.T
546		571.319	1	11.4602		19.42					0	116-120					K.GPEIR.T
541		571.318	1	11.3987		21.8					0	116-120					K.GPEIR.T
545		571.319	1	11.4482		21.81					0	116-120					K.GPEIR.T
540		571.317	1	11.3859		26.25					0	116-120					K.GPEIR.T
1000		531.35	1	14.7461		18.86					0	121-125					R.TGLIK.G
1021		531.351	1	14.8358		20.34					0	121-125					R.TGLIK.G
1090		531.349	1	15.1657		22.75					0	121-125					R.TGLIK.G
1066		531.349	1	15.0479		24.2					0	121-125					R.TGLIK.G
1052		531.349	1	14.9839		24.26					0	121-125					R.TGLIK.G
1007		531.35	1	14.7756		26.8					0	121-125					R.TGLIK.G
986		531.349	1	14.6771		32.27					0	121-125					R.TGLIK.G
1037		531.349	1	14.9081		33.22					0	121-125					R.TGLIK.G
993		531.349	1	14.7191		35.49					0	121-125					R.TGLIK.G
984		531.349	1	14.6583		36.25					0	121-125					R.TGLIK.G
2329		544.317	3	21.3467		43.48					2	121-136					R.TGLIKGSGTAEVELKK.G
3395		570.97	3	26.1601		44.55					2	121-136					R.TGLIKGSGTAEVELKK.G
1780		990.51	1	18.8118		19.29					0	126-135					K.GSGTAEVELK.K
1738		990.512	1	18.6268		35.12					0	126-135					K.GSGTAEVELK.K
1719		990.507	1	18.5351		37.01					0	126-135					K.GSGTAEVELK.K
1706		990.51	1	18.4853		37.48					0	126-135					K.GSGTAEVELK.K
1743		990.511	1	18.6606		44.95					0	126-135					K.GSGTAEVELK.K
1790		495.757	2	18.8689		15.76					0	126-135					K.GSGTAEVELK.K
1722		495.759	2	18.5689		20.27					0	126-135					K.GSGTAEVELK.K
1863		495.757	2	19.2191		22.33					0	126-135					K.GSGTAEVELK.K
1805		495.757	2	18.9405		22.37					0	126-135					K.GSGTAEVELK.K
1826		495.757	2	19.0369		23.12					0	126-135					K.GSGTAEVELK.K
1744		495.759	2	18.6613		32.55					0	126-135					K.GSGTAEVELK.K
1778		495.758	2	18.8105		37.98					0	126-135					K.GSGTAEVELK.K
1764		495.758	2	18.7594		45.08					0	126-135					K.GSGTAEVELK.K
1710		495.757	2	18.5199		50.99					0	126-135					K.GSGTAEVELK.K
1732		495.759	2	18.6157		56.32					0	126-135					K.GSGTAEVELK.K
1218		559.804	2	15.8542		17.7					1	126-136					K.GSGTAEVELKK.G
1148		559.804	2	15.4836		18.23					1	126-136					K.GSGTAEVELKK.G
1125		559.806	2	15.3727		19.03					1	126-136					K.GSGTAEVELKK.G
1163		559.804	2	15.5724		25.5					1	126-136					K.GSGTAEVELKK.G
1080		559.804	2	15.1249		34.28					1	126-136					K.GSGTAEVELKK.G
988		559.805	2	14.6946		35.27					1	126-136					K.GSGTAEVELKK.G
1110		559.805	2	15.3051		39.53					1	126-136					K.GSGTAEVELKK.G
1002		559.806	2	14.7678		41.04					1	126-136					K.GSGTAEVELKK.G
995		559.805	2	14.7384		46.32					1	126-136					K.GSGTAEVELKK.G
1136		559.806	2	15.4244		49.32					1	126-136					K.GSGTAEVELKK.G
990		559.804	2	14.7142		49.66					1	126-136					K.GSGTAEVELKK.G
1036		559.806	2	14.9074		56.31					1	126-136					K.GSGTAEVELKK.G
1065		559.805	2	15.0473		58.56					1	126-136					K.GSGTAEVELKK.G
1016		559.806	2	14.8211		58.64					1	126-136					K.GSGTAEVELKK.G
1100		559.805	2	15.2532		62.22					1	126-136					K.GSGTAEVELKK.G
1051		559.805	2	14.9833		71.65					1	126-136					K.GSGTAEVELKK.G
1020		559.807	2	14.8352		71.89					1	126-136					K.GSGTAEVELKK.G
4325		1197.58	1	30.3983		22.7					0	142-151					K.ITLDNAYMEK.C
3238		607.288	2	25.4591		16.33					0	142-151					K.ITLDNAYMEK.C
4107		607.293	2	29.3704		16.33					0	142-151					K.ITLDNAYMEK.C
3970		607.784	2	28.7191		16.42					0	142-151					K.ITLDNAYMEK.C
3941		607.785	2	28.5891		17.13					0	142-151					K.ITLDNAYMEK.C
4317		599.294	2	30.3836		17.19					0	142-151					K.ITLDNAYMEK.C
3422		607.291	2	26.2674		23.94					0	142-151					K.ITLDNAYMEK.C
4418		599.293	2	30.8055		23.97					0	142-151					K.ITLDNAYMEK.C
5464		639.274	2	35.6488		26.19					0	142-151					K.ITLDNAYMEK.C
4292		599.293	2	30.2796		32.9					0	142-151					K.ITLDNAYMEK.C
3607		607.783	2	27.0698		35.83					0	142-151					K.ITLDNAYMEK.C
4303		599.293	2	30.3318		36.25					0	142-151					K.ITLDNAYMEK.C
4449		599.292	2	30.9464		36.48					0	142-151					K.ITLDNAYMEK.C
5452		639.272	2	35.5983		36.9					0	142-151					K.ITLDNAYMEK.C
4284		599.292	2	30.2388		37.22					0	142-151					K.ITLDNAYMEK.C
4517		599.784	2	31.2369		37.53					0	142-151					K.ITLDNAYMEK.C
3360		607.291	2	26.0044		49.41					0	142-151					K.ITLDNAYMEK.C
4431		599.293	2	30.8587		54.78					0	142-151					K.ITLDNAYMEK.C
7477		734.842	2	44.9721		52.55					0	152-162					K.CDENILWLDYK.N
7488		734.841	2	45.023		56.54					0	152-162					K.CDENILWLDYK.N
3979		637.839	2	28.7648		16.39					1	163-173					K.NICKVVEVGSK.I
3945		637.837	2	28.6274		20.82					1	163-173					K.NICKVVEVGSK.I
4007		637.839	2	28.8772		21.24					1	163-173					K.NICKVVEVGSK.I
3966		637.84	2	28.7115		27.05					1	163-173					K.NICKVVEVGSK.I
2010		616.835	2	19.9272		39.21					1	163-173					K.NICKVVEVGSK.I
1998		616.834	2	19.8749		44.09					1	163-173					K.NICKVVEVGSK.I
637		717.412	1	12.3513		19.03					0	167-173					K.VVEVGSK.I
635		717.412	1	12.3342		19.87					0	167-173					K.VVEVGSK.I
631		717.413	1	12.3022		23.8					0	167-173					K.VVEVGSK.I
623		717.412	1	12.2338		24.11					0	167-173					K.VVEVGSK.I
614		717.413	1	12.1533		24.61					0	167-173					K.VVEVGSK.I
625		717.413	1	12.2504		28.79					0	167-173					K.VVEVGSK.I
597		717.413	1	12.0207		29.87					0	167-173					K.VVEVGSK.I
593		717.412	1	11.9745		30.24					0	167-173					K.VVEVGSK.I
601		717.414	1	12.0556		31.21					0	167-173					K.VVEVGSK.I
598		717.413	1	12.0305		34.13					0	167-173					K.VVEVGSK.I
619		717.413	1	12.1949		35.71					0	167-173					K.VVEVGSK.I
608		717.414	1	12.1099		36.63					0	167-173					K.VVEVGSK.I
604		717.413	1	12.082		40.15					0	167-173					K.VVEVGSK.I
594		717.411	1	11.9872		40.32					0	167-173					K.VVEVGSK.I
602		717.413	1	12.0678		40.5					0	167-173					K.VVEVGSK.I
596		717.412	1	12.0104		41.5					0	167-173					K.VVEVGSK.I
629		717.416	1	12.2827		41.84					0	167-173					K.VVEVGSK.I
620		717.412	1	12.206		42.46					0	167-173					K.VVEVGSK.I
606		717.413	1	12.096		42.86					0	167-173					K.VVEVGSK.I
610		717.412	1	12.1239		43.33					0	167-173					K.VVEVGSK.I
617		717.413	1	12.1799		45.21					0	167-173					K.VVEVGSK.I
621		717.412	1	12.2176		48.84					0	167-173					K.VVEVGSK.I
595		717.414	1	11.9992		56.18					0	167-173					K.VVEVGSK.I
615		717.411	1	12.1655		59.42					0	167-173					K.VVEVGSK.I
616		359.208	2	12.1677		18.06					0	167-173					K.VVEVGSK.I
600		359.208	2	12.055		25.4					0	167-173					K.VVEVGSK.I
7252		731.909	2	43.9252		18.33					0	174-186					K.IYVDDGLISLQVK.Q
7884		731.91	2	46.8078		22.09					0	174-186					K.IYVDDGLISLQVK.Q
7895		731.909	2	46.8572		23.2					0	174-186					K.IYVDDGLISLQVK.Q
8104		731.906	2	47.8737		23.49					0	174-186					K.IYVDDGLISLQVK.Q
9405		771.889	2	54.1279		29.79					0	174-186					K.IYVDDGLISLQVK.Q
7549		731.912	2	45.2779		37.19					0	174-186					K.IYVDDGLISLQVK.Q
7417		731.909	2	44.6841		49.07					0	174-186					K.IYVDDGLISLQVK.Q
7535		731.911	2	45.2272		61.36					0	174-186					K.IYVDDGLISLQVK.Q
7422		731.91	2	44.7191		80.47					0	174-186					K.IYVDDGLISLQVK.Q
5896		859.988	2	37.7132		30.74					1	174-188					K.IYVDDGLISLQVKQK.G
5426		1019	2	35.489		17.48					1	187-206					K.QKGADFLVTEVENGGSLGSK.K
5420		1019	2	35.4462		23.51					1	187-206					K.QKGADFLVTEVENGGSLGSK.K
5656		679.349	3	36.5599		17.64					1	187-206					K.QKGADFLVTEVENGGSLGSK.K
6758		890.438	2	41.6276		20.36					0	189-206					K.GADFLVTEVENGGSLGSK.K
7083		890.443	2	43.0885		39.1					0	189-206					K.GADFLVTEVENGGSLGSK.K
6635		890.437	2	41.0967		39.97					0	189-206					K.GADFLVTEVENGGSLGSK.K
7157		890.934	2	43.4477		45.28					0	189-206					K.GADFLVTEVENGGSLGSK.K
7034		890.443	2	42.9166		48.61					0	189-206					K.GADFLVTEVENGGSLGSK.K
6837		890.934	2	42.0077		55.04					0	189-206					K.GADFLVTEVENGGSLGSK.K
6822		890.933	2	41.9483		56.1					0	189-206					K.GADFLVTEVENGGSLGSK.K
6847		890.933	2	42.0537		57.39					0	189-206					K.GADFLVTEVENGGSLGSK.K
6810		890.932	2	41.8971		58.69					0	189-206					K.GADFLVTEVENGGSLGSK.K
6844		890.933	2	42.0502		75.51					0	189-206					K.GADFLVTEVENGGSLGSK.K
7051		890.443	2	42.9697		75.71					0	189-206					K.GADFLVTEVENGGSLGSK.K
6856		890.934	2	42.0994		77.28					0	189-206					K.GADFLVTEVENGGSLGSK.K
7089		890.442	2	43.1268		81.28					0	189-206					K.GADFLVTEVENGGSLGSK.K
5498		954.98	2	35.8021		51.06					1	189-207					K.GADFLVTEVENGGSLGSKK.G
5376		882.992	2	35.2781		45.78					1	207-224					K.KGVNLPGAAVDLPAVSEK.D
5387		882.996	2	35.3287		102.13					1	207-224					K.KGVNLPGAAVDLPAVSEK.D
5406		882.996	2	35.3907		110.55					1	207-224					K.KGVNLPGAAVDLPAVSEK.D
5412		882.996	2	35.4314		110.78					1	207-224					K.KGVNLPGAAVDLPAVSEK.D
5415		882.996	2	35.436		119.05					1	207-224					K.KGVNLPGAAVDLPAVSEK.D
5400		588.999	3	35.3808		47.12					1	207-224					K.KGVNLPGAAVDLPAVSEK.D
5388		588.999	3	35.3294		59.5					1	207-224					K.KGVNLPGAAVDLPAVSEK.D
6448		826.455	3	40.2316		17.92					2	207-230					K.KGVNLPGAAVDLPAVSEKDIQDLK.F
6458		826.457	3	40.2794		76.53					2	207-230					K.KGVNLPGAAVDLPAVSEKDIQDLK.F
6497		826.457	3	40.4397		118.34					2	207-230					K.KGVNLPGAAVDLPAVSEKDIQDLK.F
6482		826.459	3	40.3815		121.28					2	207-230					K.KGVNLPGAAVDLPAVSEKDIQDLK.F
6473		620.094	4	40.3346		38.42					2	207-230					K.KGVNLPGAAVDLPAVSEKDIQDLK.F
6484		620.094	4	40.3839		52.9					2	207-230					K.KGVNLPGAAVDLPAVSEKDIQDLK.F
7072		819.437	2	43.0398		16.76					0	208-224					K.GVNLPGAAVDLPAVSEK.D
6688		818.949	2	41.3523		20.1					0	208-224					K.GVNLPGAAVDLPAVSEK.D
6686		818.949	2	41.3499		38.81					0	208-224					K.GVNLPGAAVDLPAVSEK.D
6749		818.948	2	41.6128		46.74					0	208-224					K.GVNLPGAAVDLPAVSEK.D
6710		818.949	2	41.455		49.43					0	208-224					K.GVNLPGAAVDLPAVSEK.D
6664		818.948	2	41.2484		52.67					0	208-224					K.GVNLPGAAVDLPAVSEK.D
6700		818.949	2	41.4056		58.09					0	208-224					K.GVNLPGAAVDLPAVSEK.D
6732		818.949	2	41.559		59.87					0	208-224					K.GVNLPGAAVDLPAVSEK.D
6736		818.949	2	41.5647		73.8					0	208-224					K.GVNLPGAAVDLPAVSEK.D
7530		1175.13	2	45.1882		17.43					1	208-230					K.GVNLPGAAVDLPAVSEKDIQDLK.F
7537		1175.14	2	45.2288		25.08					1	208-230					K.GVNLPGAAVDLPAVSEKDIQDLK.F
7564		1175.14	2	45.331		40					1	208-230					K.GVNLPGAAVDLPAVSEKDIQDLK.F
7551		1175.14	2	45.2792		70.74					1	208-230					K.GVNLPGAAVDLPAVSEKDIQDLK.F
7536		783.759	3	45.2278		60.59					1	208-230					K.GVNLPGAAVDLPAVSEKDIQDLK.F
7550		783.76	3	45.2785		70.96					1	208-230					K.GVNLPGAAVDLPAVSEKDIQDLK.F
7610		783.759	3	45.5427		85.23					1	208-230					K.GVNLPGAAVDLPAVSEKDIQDLK.F
7600		783.759	3	45.4928		100.98					1	208-230					K.GVNLPGAAVDLPAVSEKDIQDLK.F
2895		731.393	1	23.9496		18.53					0	225-230					K.DIQDLK.F
2910		731.391	1	24.0084		20.32					0	225-230					K.DIQDLK.F
2094		731.391	1	20.3038		22.14					0	225-230					K.DIQDLK.F
2436		732.375	1	21.8374		26.68					0	225-230					K.DIQDLK.F
2056		731.392	1	20.13		27.7					0	225-230					K.DIQDLK.F
1721		731.392	1	18.5394		32.39					0	225-230					K.DIQDLK.F
1991		731.393	1	19.8328		34.27					0	225-230					K.DIQDLK.F
2105		731.391	1	20.3541		36.09					0	225-230					K.DIQDLK.F
2082		731.392	1	20.2535		36.44					0	225-230					K.DIQDLK.F
2456		732.375	1	21.9138		39.2					0	225-230					K.DIQDLK.F
1958		731.391	1	19.6756		39.27					0	225-230					K.DIQDLK.F
2068		731.391	1	20.1982		40					0	225-230					K.DIQDLK.F
1968		731.392	1	19.719		45.41					0	225-230					K.DIQDLK.F
1982		731.393	1	19.7915		48.47					0	225-230					K.DIQDLK.F
11144		930.454	2	62.7771		21					0	231-246					K.FGVEQDVDMVFASFIR.K
10741		938.448	2	60.7518		27.64					0	231-246					K.FGVEQDVDMVFASFIR.K
10753		938.447	2	60.8051		29.05					0	231-246					K.FGVEQDVDMVFASFIR.K
11158		930.448	2	62.8313		31.97					0	231-246					K.FGVEQDVDMVFASFIR.K
10865		938.947	2	61.411		33.86					0	231-246					K.FGVEQDVDMVFASFIR.K
10714		938.452	2	60.6159		40.77					0	231-246					K.FGVEQDVDMVFASFIR.K
10682		938.449	2	60.4838		45.4					0	231-246					K.FGVEQDVDMVFASFIR.K
10032		930.455	2	57.2668		49.2					0	231-246					K.FGVEQDVDMVFASFIR.K
11176		930.453	2	62.9167		54.75					0	231-246					K.FGVEQDVDMVFASFIR.K
11264		930.448	2	63.2945		58.03					0	231-246					K.FGVEQDVDMVFASFIR.K
11214		930.452	2	63.0951		58.39					0	231-246					K.FGVEQDVDMVFASFIR.K
11202		930.453	2	63.0445		60.18					0	231-246					K.FGVEQDVDMVFASFIR.K
10669		938.45	2	60.417		63.89					0	231-246					K.FGVEQDVDMVFASFIR.K
10727		938.45	2	60.6947		64.73					0	231-246					K.FGVEQDVDMVFASFIR.K
10696		938.448	2	60.5354		65.68					0	231-246					K.FGVEQDVDMVFASFIR.K
10581		938.452	2	60.0512		74.32					0	231-246					K.FGVEQDVDMVFASFIR.K
10534		938.448	2	59.8518		77.54					0	231-246					K.FGVEQDVDMVFASFIR.K
11231		930.452	2	63.1557		78.39					0	231-246					K.FGVEQDVDMVFASFIR.K
10586		938.452	2	60.0603		79.96					0	231-246					K.FGVEQDVDMVFASFIR.K
11181		930.45	2	62.9448		87.42					0	231-246					K.FGVEQDVDMVFASFIR.K
10654		938.452	2	60.3605		98.16					0	231-246					K.FGVEQDVDMVFASFIR.K
10555		938.452	2	59.947		107.34					0	231-246					K.FGVEQDVDMVFASFIR.K
10544		938.452	2	59.898		117.88					0	231-246					K.FGVEQDVDMVFASFIR.K
10576		938.451	2	60.0147		117.92					0	231-246					K.FGVEQDVDMVFASFIR.K
10639		938.452	2	60.2906		121.14					0	231-246					K.FGVEQDVDMVFASFIR.K
10608		938.451	2	60.1584		121.24					0	231-246					K.FGVEQDVDMVFASFIR.K
10627		938.451	2	60.2417		142.24					0	231-246					K.FGVEQDVDMVFASFIR.K
10567		938.451	2	59.9987		166.02					0	231-246					K.FGVEQDVDMVFASFIR.K
10556		625.969	3	59.9487		15.27					0	231-246					K.FGVEQDVDMVFASFIR.K
10546		625.966	3	59.9018		21.38					0	231-246					K.FGVEQDVDMVFASFIR.K
10594		625.97	3	60.0695		43.12					0	231-246					K.FGVEQDVDMVFASFIR.K
369		520.776	2	10.1696		21.45					1	247-255					R.KASDVHEVR.K
365		520.778	2	10.1287		25.58					1	247-255					R.KASDVHEVR.K
378		520.779	2	10.2501		32.7					1	247-255					R.KASDVHEVR.K
355		520.776	2	10.0323		36.86					1	247-255					R.KASDVHEVR.K
322		520.776	2	9.83227		49.06					1	247-255					R.KASDVHEVR.K
328		520.777	2	9.87696		52.2					1	247-255					R.KASDVHEVR.K
351		520.776	2	9.99538		52.76					1	247-255					R.KASDVHEVR.K
344		520.777	2	9.94899		57.77					1	247-255					R.KASDVHEVR.K
361		520.777	2	10.0741		58.12					1	247-255					R.KASDVHEVR.K
362		520.776	2	10.0867		64.84					1	247-255					R.KASDVHEVR.K
321		520.777	2	9.81644		64.99					1	247-255					R.KASDVHEVR.K
326		520.777	2	9.84853		67.45					1	247-255					R.KASDVHEVR.K
329		347.52	3	9.87838		43.6					1	247-255					R.KASDVHEVR.K
335		347.52	3	9.91108		50.77					1	247-255					R.KASDVHEVR.K
290		584.823	2	9.54417		29.67					2	247-256					R.KASDVHEVRK.V
283		584.823	2	9.51029		34.82					2	247-256					R.KASDVHEVRK.V
295		584.823	2	9.57941		45.16					2	247-256					R.KASDVHEVRK.V
284		584.824	2	9.52244		63.71					2	247-256					R.KASDVHEVRK.V
292		390.218	3	9.56497		15.12					2	247-256					R.KASDVHEVRK.V
286		390.218	3	9.53768		16.33					2	247-256					R.KASDVHEVRK.V
383		456.729	2	10.3096		29.7					0	248-255					K.ASDVHEVR.K
386		456.73	2	10.3288		41.46					0	248-255					K.ASDVHEVR.K
389		456.729	2	10.347		44.68					0	248-255					K.ASDVHEVR.K
382		456.727	2	10.297		57.85					0	248-255					K.ASDVHEVR.K
301		520.776	2	9.6313		22.26					1	248-256					K.ASDVHEVRK.V
297		520.777	2	9.60703		40.97					1	248-256					K.ASDVHEVRK.V
296		520.775	2	9.59505		54.74					1	248-256					K.ASDVHEVRK.V
392		673.422	1	10.3619		20.49					1	256-261					R.KVLGEK.G
396		673.42	1	10.3826		25.09					1	256-261					R.KVLGEK.G
406		673.428	1	10.4194		41.62					1	256-261					R.KVLGEK.G
405		337.215	2	10.4174		17.36					1	256-261					R.KVLGEK.G
394		337.213	2	10.3784		18.47					1	256-261					R.KVLGEK.G
527		545.329	1	11.1393		15.74					0	257-261					K.VLGEK.G
525		545.329	1	11.1236		20.68					0	257-261					K.VLGEK.G
515		545.326	1	11.0499		26.64					0	257-261					K.VLGEK.G
529		545.328	1	11.1555		27.58					0	257-261					K.VLGEK.G
516		545.326	1	11.0627		30.71					0	257-261					K.VLGEK.G
531		545.327	1	11.1723		31.83					0	257-261					K.VLGEK.G
518		545.329	1	11.0762		32.97					0	257-261					K.VLGEK.G
522		545.327	1	11.0997		33.27					0	257-261					K.VLGEK.G
1284		408.271	2	16.1819		27.71					1	264-270					K.NIKIISK.I
1287		697.889	2	16.1879		31.05					1	267-278					K.IISKIENHEGVR.R
1297		697.889	2	16.2354		31.42					1	267-278					K.IISKIENHEGVR.R
2740		718.893	2	23.2448		38.32					1	267-278					K.IISKIENHEGVR.R
1296		465.595	3	16.2334		31.56					1	267-278					K.IISKIENHEGVR.R
465		477.739	2	10.7466		15.31					0	271-278					K.IENHEGVR.R
423		477.242	2	10.5496		20.71					0	271-278					K.IENHEGVR.R
390		477.242	2	10.3579		21.98					0	271-278					K.IENHEGVR.R
399		477.243	2	10.4068		22.9					0	271-278					K.IENHEGVR.R
420		477.243	2	10.5233		26.37					0	271-278					K.IENHEGVR.R
393		477.243	2	10.3767		33.63					0	271-278					K.IENHEGVR.R
407		477.244	2	10.4422		38.55					0	271-278					K.IENHEGVR.R
415		477.243	2	10.4942		40.17					0	271-278					K.IENHEGVR.R
341		555.293	2	9.94394		20.5					1	271-279					K.IENHEGVRR.F
7073		911.463	2	43.0708		40.99					1	279-294					R.RFDEILEASDGIMVAR.G
7085		911.463	2	43.1204		84.56					1	279-294					R.RFDEILEASDGIMVAR.G
6080		613.307	3	38.5729		21.84					1	279-294					R.RFDEILEASDGIMVAR.G
6874		613.306	3	42.1613		24.26					1	279-294					R.RFDEILEASDGIMVAR.G
6093		613.307	3	38.621		37.38					1	279-294					R.RFDEILEASDGIMVAR.G
7295		607.973	3	44.1266		40.69					1	279-294					R.RFDEILEASDGIMVAR.G
6805		607.978	3	41.8608		42.77					1	279-294					R.RFDEILEASDGIMVAR.G
7036		607.976	3	42.9183		46.18					1	279-294					R.RFDEILEASDGIMVAR.G
6204		613.308	3	39.1218		47.34					1	279-294					R.RFDEILEASDGIMVAR.G
6222		613.308	3	39.1742		47.92					1	279-294					R.RFDEILEASDGIMVAR.G
7061		607.976	3	43.0187		50.23					1	279-294					R.RFDEILEASDGIMVAR.G
7030		607.974	3	42.8791		52.69					1	279-294					R.RFDEILEASDGIMVAR.G
7042		607.976	3	42.9279		55.47					1	279-294					R.RFDEILEASDGIMVAR.G
6244		613.308	3	39.2776		56.98					1	279-294					R.RFDEILEASDGIMVAR.G
7075		607.978	3	43.0731		61.12					1	279-294					R.RFDEILEASDGIMVAR.G
6256		613.309	3	39.3331		64.82					1	279-294					R.RFDEILEASDGIMVAR.G
7048		607.977	3	42.9663		68.17					1	279-294					R.RFDEILEASDGIMVAR.G
7067		607.976	3	43.0295		71.79					1	279-294					R.RFDEILEASDGIMVAR.G
6790		841.408	2	41.8018		20.2					0	280-294					R.FDEILEASDGIMVAR.G
8262		833.416	2	48.6346		30.21					0	280-294					R.FDEILEASDGIMVAR.G
7639		833.409	2	45.6925		33.39					0	280-294					R.FDEILEASDGIMVAR.G
6799		841.409	2	41.8491		38.62					0	280-294					R.FDEILEASDGIMVAR.G
7819		833.41	2	46.5074		42.89					0	280-294					R.FDEILEASDGIMVAR.G
7707		833.41	2	45.9915		64.34					0	280-294					R.FDEILEASDGIMVAR.G
7750		833.41	2	46.1589		73.08					0	280-294					R.FDEILEASDGIMVAR.G
5308		1141.61	1	34.9433		21.43					0	295-305					R.GDLGIEIPAEK.V
5320		1141.61	1	34.9944		41.88					0	295-305					R.GDLGIEIPAEK.V
5283		571.307	2	34.8707		32.4					0	295-305					R.GDLGIEIPAEK.V
5295		571.308	2	34.9218		32.89					0	295-305					R.GDLGIEIPAEK.V
5272		571.307	2	34.8186		37.49					0	295-305					R.GDLGIEIPAEK.V
9431		935.516	2	54.2624		16.2					1	295-311					R.GDLGIEIPAEKVFLAQK.M
1803		705.429	1	18.9381		20.82					0	306-311					K.VFLAQK.M
2147		706.413	1	20.5151		22.14					0	306-311					K.VFLAQK.M
1923		705.428	1	19.5255		22.28					0	306-311					K.VFLAQK.M
2100		705.427	1	20.3158		23.9					0	306-311					K.VFLAQK.M
2173		706.412	1	20.6122		24.19					0	306-311					K.VFLAQK.M
1858		705.43	1	19.2107		26.69					0	306-311					K.VFLAQK.M
1800		705.429	1	18.9189		27.55					0	306-311					K.VFLAQK.M
1817		705.429	1	19.0036		30.34					0	306-311					K.VFLAQK.M
1877		705.43	1	19.3102		32.69					0	306-311					K.VFLAQK.M
1892		705.429	1	19.3687		36.34					0	306-311					K.VFLAQK.M
1843		705.43	1	19.1419		36.85					0	306-311					K.VFLAQK.M
1906		705.428	1	19.4255		38.29					0	306-311					K.VFLAQK.M
1822		705.429	1	19.0305		41.64					0	306-311					K.VFLAQK.M
1557		607.305	1	17.7254		18.11					0	312-316					K.MMIGR.C
1547		607.305	1	17.6804		24.71					0	312-316					K.MMIGR.C
8431		978.966	2	49.4409		15.01					1	320-336					R.AGKPVICATQMLESMIK.K
8440		978.966	2	49.4883		16.63					1	320-336					R.AGKPVICATQMLESMIK.K
9000		978.966	2	52.2139		19.99					1	320-336					R.AGKPVICATQMLESMIK.K
6321		986.963	2	39.637		21.69					1	320-336					R.AGKPVICATQMLESMIK.K
9009		978.965	2	52.2589		22.88					1	320-336					R.AGKPVICATQMLESMIK.K
4490		954.983	2	31.1356		29.45					1	320-336					R.AGKPVICATQMLESMIK.K
6440		986.963	2	40.1851		30.62					1	320-336					R.AGKPVICATQMLESMIK.K
5875		946.983	2	37.6454		39.12					1	320-336					R.AGKPVICATQMLESMIK.K
5554		946.981	2	36.0555		39.81					1	320-336					R.AGKPVICATQMLESMIK.K
7359		938.987	2	44.4335		39.83					1	320-336					R.AGKPVICATQMLESMIK.K
7363		938.987	2	44.4691		42.57					1	320-336					R.AGKPVICATQMLESMIK.K
4502		954.982	2	31.1851		42.7					1	320-336					R.AGKPVICATQMLESMIK.K
5467		946.986	2	35.6836		42.92					1	320-336					R.AGKPVICATQMLESMIK.K
5457		946.983	2	35.635		45.93					1	320-336					R.AGKPVICATQMLESMIK.K
5871		946.983	2	37.6102		49.14					1	320-336					R.AGKPVICATQMLESMIK.K
5565		946.982	2	36.1091		71.76					1	320-336					R.AGKPVICATQMLESMIK.K
4523		954.981	2	31.2459		76.68					1	320-336					R.AGKPVICATQMLESMIK.K
5483		946.985	2	35.7433		79.82					1	320-336					R.AGKPVICATQMLESMIK.K
5568		946.985	2	36.1439		82.66					1	320-336					R.AGKPVICATQMLESMIK.K
7406		938.988	2	44.6358		82.66					1	320-336					R.AGKPVICATQMLESMIK.K
5579		946.984	2	36.1962		82.67					1	320-336					R.AGKPVICATQMLESMIK.K
5597		946.984	2	36.2589		83.99					1	320-336					R.AGKPVICATQMLESMIK.K
5909		946.986	2	37.7967		92.7					1	320-336					R.AGKPVICATQMLESMIK.K
7416		938.987	2	44.6822		97.81					1	320-336					R.AGKPVICATQMLESMIK.K
7386		938.986	2	44.5694		100					1	320-336					R.AGKPVICATQMLESMIK.K
5897		946.984	2	37.7442		100.33					1	320-336					R.AGKPVICATQMLESMIK.K
5913		946.986	2	37.8032		100.46					1	320-336					R.AGKPVICATQMLESMIK.K
5492		946.986	2	35.7893		101.5					1	320-336					R.AGKPVICATQMLESMIK.K
5463		631.661	3	35.6466		15.73					1	320-336					R.AGKPVICATQMLESMIK.K
4470		636.989	3	31.0425		18.2					1	320-336					R.AGKPVICATQMLESMIK.K
4491		636.99	3	31.1363		22.95					1	320-336					R.AGKPVICATQMLESMIK.K
4503		636.989	3	31.1858		35.84					1	320-336					R.AGKPVICATQMLESMIK.K
5469		631.658	3	35.686		36.51					1	320-336					R.AGKPVICATQMLESMIK.K
5877		631.659	3	37.6485		36.83					1	320-336					R.AGKPVICATQMLESMIK.K
7367		626.323	3	44.4761		39.09					1	320-336					R.AGKPVICATQMLESMIK.K
5872		631.657	3	37.6124		40.31					1	320-336					R.AGKPVICATQMLESMIK.K
5580		631.658	3	36.1968		43.38					1	320-336					R.AGKPVICATQMLESMIK.K
7373		626.325	3	44.5168		47.61					1	320-336					R.AGKPVICATQMLESMIK.K
5886		631.659	3	37.6928		57.08					1	320-336					R.AGKPVICATQMLESMIK.K
5898		631.657	3	37.7448		57.17					1	320-336					R.AGKPVICATQMLESMIK.K
5903		631.657	3	37.7547		66.57					1	320-336					R.AGKPVICATQMLESMIK.K
8642		810.91	2	50.4796		21.07					0	323-336					K.PVICATQMLESMIK.K
9620		1248.07	2	55.2324		18.77					0	343-367					R.AEGSDVANAVLDGADCIMLSGETAK.G
7965		1247.58	2	47.2076		19.63					0	343-367					R.AEGSDVANAVLDGADCIMLSGETAK.G
7733		1247.58	2	46.0967		20.3					0	343-367					R.AEGSDVANAVLDGADCIMLSGETAK.G
9323		1247.57	2	53.7359		20.87					0	343-367					R.AEGSDVANAVLDGADCIMLSGETAK.G
9639		1248.07	2	55.2999		33.36					0	343-367					R.AEGSDVANAVLDGADCIMLSGETAK.G
7955		1247.58	2	47.1573		34.76					0	343-367					R.AEGSDVANAVLDGADCIMLSGETAK.G
9659		1248.07	2	55.419		39.6					0	343-367					R.AEGSDVANAVLDGADCIMLSGETAK.G
8003		1248.07	2	47.3701		47.85					0	343-367					R.AEGSDVANAVLDGADCIMLSGETAK.G
9298		1247.58	2	53.6354		48.9					0	343-367					R.AEGSDVANAVLDGADCIMLSGETAK.G
9201		1247.57	2	53.1933		52.71					0	343-367					R.AEGSDVANAVLDGADCIMLSGETAK.G
9211		1247.57	2	53.2419		76.76					0	343-367					R.AEGSDVANAVLDGADCIMLSGETAK.G
9334		1247.57	2	53.7846		79.44					0	343-367					R.AEGSDVANAVLDGADCIMLSGETAK.G
7784		1255.58	2	46.3472		99.25					0	343-367					R.AEGSDVANAVLDGADCIMLSGETAK.G
9280		1247.58	2	53.5305		100.6					0	343-367					R.AEGSDVANAVLDGADCIMLSGETAK.G
7795		1255.58	2	46.3989		104.17					0	343-367					R.AEGSDVANAVLDGADCIMLSGETAK.G
9234		1247.58	2	53.3458		126.99					0	343-367					R.AEGSDVANAVLDGADCIMLSGETAK.G
7797		1255.58	2	46.4019		128.76					0	343-367					R.AEGSDVANAVLDGADCIMLSGETAK.G
9251		1247.58	2	53.4055		136.97					0	343-367					R.AEGSDVANAVLDGADCIMLSGETAK.G
9274		1247.58	2	53.5227		142.88					0	343-367					R.AEGSDVANAVLDGADCIMLSGETAK.G
7806		1255.57	2	46.4503		151.46					0	343-367					R.AEGSDVANAVLDGADCIMLSGETAK.G
9243		1247.58	2	53.3898		161.19					0	343-367					R.AEGSDVANAVLDGADCIMLSGETAK.G
9232		1247.58	2	53.3432		172.87					0	343-367					R.AEGSDVANAVLDGADCIMLSGETAK.G
7794		837.381	3	46.368		16.5					0	343-367					R.AEGSDVANAVLDGADCIMLSGETAK.G
9212		832.051	3	53.2439		23.44					0	343-367					R.AEGSDVANAVLDGADCIMLSGETAK.G
9276		832.052	3	53.5241		37.68					0	343-367					R.AEGSDVANAVLDGADCIMLSGETAK.G
9233		832.051	3	53.3439		38.76					0	343-367					R.AEGSDVANAVLDGADCIMLSGETAK.G
9242		832.052	3	53.388		86.12					0	343-367					R.AEGSDVANAVLDGADCIMLSGETAK.G
3936		1019.52	1	28.5809		17.81					0	368-376					K.GDYPLEAVR.M
3912		1019.52	1	28.4569		19.54					0	368-376					K.GDYPLEAVR.M
3903		1019.52	1	28.4103		19.56					0	368-376					K.GDYPLEAVR.M
3992		510.259	2	28.8193		19.7					0	368-376					K.GDYPLEAVR.M
3935		510.261	2	28.5802		20.85					0	368-376					K.GDYPLEAVR.M
3892		510.261	2	28.3901		21.58					0	368-376					K.GDYPLEAVR.M
3881		510.261	2	28.3384		30.83					0	368-376					K.GDYPLEAVR.M
3977		510.26	2	28.7615		32.04					0	368-376					K.GDYPLEAVR.M
3950		510.261	2	28.6367		33.32					0	368-376					K.GDYPLEAVR.M
3964		510.26	2	28.7085		34.53					0	368-376					K.GDYPLEAVR.M
1175		868.48	1	15.6458		30.09					0	377-383					R.MQHLIAR.E
825		442.741	2	13.6815		15.15					0	377-383					R.MQHLIAR.E
862		442.741	2	13.9007		15.15					0	377-383					R.MQHLIAR.E
818		442.741	2	13.6385		15.72					0	377-383					R.MQHLIAR.E
1273		434.743	2	16.1277		15.83					0	377-383					R.MQHLIAR.E
774		442.742	2	13.3947		16.58					0	377-383					R.MQHLIAR.E
847		442.742	2	13.8067		16.7					0	377-383					R.MQHLIAR.E
967		442.741	2	14.5538		17.92					0	377-383					R.MQHLIAR.E
1167		434.744	2	15.6065		18.39					0	377-383					R.MQHLIAR.E
807		442.741	2	13.5745		18.41					0	377-383					R.MQHLIAR.E
832		442.741	2	13.7127		18.73					0	377-383					R.MQHLIAR.E
761		442.743	2	13.313		19.22					0	377-383					R.MQHLIAR.E
957		442.74	2	14.4978		19.3					0	377-383					R.MQHLIAR.E
796		442.742	2	13.5078		19.37					0	377-383					R.MQHLIAR.E
1157		434.742	2	15.5613		19.63					0	377-383					R.MQHLIAR.E
726		442.741	2	13.1106		20.18					0	377-383					R.MQHLIAR.E
1046		442.74	2	14.9485		20.42					0	377-383					R.MQHLIAR.E
884		442.74	2	14.0494		20.48					0	377-383					R.MQHLIAR.E
895		442.741	2	14.1296		20.68					0	377-383					R.MQHLIAR.E
934		442.74	2	14.3566		21.06					0	377-383					R.MQHLIAR.E
869		442.74	2	13.9489		21.2					0	377-383					R.MQHLIAR.E
948		442.741	2	14.4497		23.42					0	377-383					R.MQHLIAR.E
747		442.742	2	13.2476		23.52					0	377-383					R.MQHLIAR.E
1176		434.744	2	15.6465		24.74					0	377-383					R.MQHLIAR.E
751		442.742	2	13.267		24.8					0	377-383					R.MQHLIAR.E
737		442.741	2	13.1818		26.03					0	377-383					R.MQHLIAR.E
739		442.741	2	13.1958		26.07					0	377-383					R.MQHLIAR.E
731		442.742	2	13.1372		26.25					0	377-383					R.MQHLIAR.E
1265		434.743	2	16.0843		26.79					0	377-383					R.MQHLIAR.E
732		442.741	2	13.1483		26.83					0	377-383					R.MQHLIAR.E
1255		434.744	2	16.0273		27.55					0	377-383					R.MQHLIAR.E
1043		442.739	2	14.9163		27.58					0	377-383					R.MQHLIAR.E
1070		442.739	2	15.0552		29.32					0	377-383					R.MQHLIAR.E
1211		434.743	2	15.8404		29.49					0	377-383					R.MQHLIAR.E
8002		966.496	2	47.3688		28.29					0	384-399					R.EAEAAIYHLQLFEELR.R
7880		966.495	2	46.8006		28.47					0	384-399					R.EAEAAIYHLQLFEELR.R
7875		966.495	2	46.7625		31.04					0	384-399					R.EAEAAIYHLQLFEELR.R
7891		966.497	2	46.8506		112.44					0	384-399					R.EAEAAIYHLQLFEELR.R
7902		966.498	2	46.8993		119.42					0	384-399					R.EAEAAIYHLQLFEELR.R
7924		644.666	3	46.9998		81.51					0	384-399					R.EAEAAIYHLQLFEELR.R
7892		644.666	3	46.8515		88.58					0	384-399					R.EAEAAIYHLQLFEELR.R
7885		644.664	3	46.8099		101.1					0	384-399					R.EAEAAIYHLQLFEELR.R
6764		696.696	3	41.6693		18.91					1	384-400					R.EAEAAIYHLQLFEELRR.L
6776		696.699	3	41.7467		32.1					1	384-400					R.EAEAAIYHLQLFEELRR.L
6768		696.698	3	41.701		35.28					1	384-400					R.EAEAAIYHLQLFEELRR.L
6786		696.7	3	41.7946		52.46					1	384-400					R.EAEAAIYHLQLFEELRR.L
6808		696.7	3	41.8956		65.37					1	384-400					R.EAEAAIYHLQLFEELRR.L
6834		696.701	3	42.0017		69.26					1	384-400					R.EAEAAIYHLQLFEELRR.L
6825		696.701	3	41.9524		99.39					1	384-400					R.EAEAAIYHLQLFEELRR.L
6912		777.739	3	42.325		45.23					1	400-422					R.RLAPITSDPTEATAVGAVEASFK.C
6914		777.744	3	42.3588		50.12					1	400-422					R.RLAPITSDPTEATAVGAVEASFK.C
8375		1088.06	2	49.166		27.01					0	401-422					R.LAPITSDPTEATAVGAVEASFK.C
8591		1088.06	2	50.2308		28.47					0	401-422					R.LAPITSDPTEATAVGAVEASFK.C
8129		1088.06	2	48.0119		43.88					0	401-422					R.LAPITSDPTEATAVGAVEASFK.C
8392		1088.06	2	49.2259		53.92					0	401-422					R.LAPITSDPTEATAVGAVEASFK.C
8187		1088.07	2	48.2667		77.83					0	401-422					R.LAPITSDPTEATAVGAVEASFK.C
8176		1088.06	2	48.2185		95.14					0	401-422					R.LAPITSDPTEATAVGAVEASFK.C
8140		1088.06	2	48.0627		96					0	401-422					R.LAPITSDPTEATAVGAVEASFK.C
8218		1088.07	2	48.3838		106.22					0	401-422					R.LAPITSDPTEATAVGAVEASFK.C
8274		1088.06	2	48.698		108.68					0	401-422					R.LAPITSDPTEATAVGAVEASFK.C
8197		1088.06	2	48.315		125.66					0	401-422					R.LAPITSDPTEATAVGAVEASFK.C
8302		1088.06	2	48.8019		146.29					0	401-422					R.LAPITSDPTEATAVGAVEASFK.C
8213		1088.07	2	48.3748		148.22					0	401-422					R.LAPITSDPTEATAVGAVEASFK.C
8208		1088.07	2	48.3657		158.77					0	401-422					R.LAPITSDPTEATAVGAVEASFK.C
8163		725.71	3	48.1661		27.06					0	401-422					R.LAPITSDPTEATAVGAVEASFK.C
4435		611.316	2	30.8968		22.61					0	423-433					K.CCSGAIIVLTK.S
4441		611.316	2	30.933		41.84					0	423-433					K.CCSGAIIVLTK.S
4455		611.318	2	30.9852		44.78					0	423-433					K.CCSGAIIVLTK.S
4465		611.318	2	31.0333		58					0	423-433					K.CCSGAIIVLTK.S
3186		840.53	1	25.2101		18.64					0	448-455					R.APIIAVTR.N
3123		840.531	1	24.9679		22.37					0	448-455					R.APIIAVTR.N
3204		840.529	1	25.2872		25.89					0	448-455					R.APIIAVTR.N
3157		840.531	1	25.1057		29.89					0	448-455					R.APIIAVTR.N
3174		840.531	1	25.163		33.53					0	448-455					R.APIIAVTR.N
3107		840.53	1	24.9116		53.81					0	448-455					R.APIIAVTR.N
3252		420.767	2	25.5105		16.11					0	448-455					R.APIIAVTR.N
3324		420.768	2	25.8202		23.56					0	448-455					R.APIIAVTR.N
3156		420.769	2	25.1051		27.1					0	448-455					R.APIIAVTR.N
3202		420.768	2	25.2859		27.4					0	448-455					R.APIIAVTR.N
3218		420.768	2	25.3637		27.54					0	448-455					R.APIIAVTR.N
3185		420.768	2	25.2095		31.49					0	448-455					R.APIIAVTR.N
3088		420.767	2	24.8487		31.71					0	448-455					R.APIIAVTR.N
3101		420.769	2	24.9005		35.3					0	448-455					R.APIIAVTR.N
3127		420.769	2	25.0031		36.58					0	448-455					R.APIIAVTR.N
3114		420.769	2	24.953		39.13					0	448-455					R.APIIAVTR.N
3172		420.769	2	25.1617		41.75					0	448-455					R.APIIAVTR.N
499		787.418	1	10.945		15.31					0	462-467					R.QAHLYR.G
510		787.42	1	11.0092		15.89					0	462-467					R.QAHLYR.G
455		787.419	1	10.6968		16.89					0	462-467					R.QAHLYR.G
535		394.212	2	11.2254		16.26					0	462-467					R.QAHLYR.G
486		394.213	2	10.8706		16.4					0	462-467					R.QAHLYR.G
592		394.704	2	11.9616		17.18					0	462-467					R.QAHLYR.G
521		394.213	2	11.0978		18.64					0	462-467					R.QAHLYR.G
490		394.213	2	10.8974		19.34					0	462-467					R.QAHLYR.G
589		394.705	2	11.9138		20.11					0	462-467					R.QAHLYR.G
538		394.214	2	11.2905		21.24					0	462-467					R.QAHLYR.G
530		394.212	2	11.1702		22.09					0	462-467					R.QAHLYR.G
526		394.213	2	11.1373		22.51					0	462-467					R.QAHLYR.G
498		394.213	2	10.9429		23.61					0	462-467					R.QAHLYR.G
495		394.214	2	10.9245		23.82					0	462-467					R.QAHLYR.G
534		394.213	2	11.2126		24.91					0	462-467					R.QAHLYR.G
456		394.213	2	10.7144		27.01					0	462-467					R.QAHLYR.G
462		394.213	2	10.7414		27.86					0	462-467					R.QAHLYR.G
586		394.705	2	11.8813		34.17					0	462-467					R.QAHLYR.G
5929		933.522	1	37.864		28.21					0	468-475					R.GIFPVLCK.D
5873		467.264	2	37.6436		19.27					0	468-475					R.GIFPVLCK.D
5845		467.262	2	37.5084		22.64					0	468-475					R.GIFPVLCK.D
8848		853.093	3	51.471		40.07					1	468-489					R.GIFPVLCKDPVQEAWAEDVDLR.V
8868		853.095	3	51.5693		45.81					1	468-489					R.GIFPVLCKDPVQEAWAEDVDLR.V
8898		853.095	3	51.6848		46.03					1	468-489					R.GIFPVLCKDPVQEAWAEDVDLR.V
8913		853.094	3	51.7403		49.42					1	468-489					R.GIFPVLCKDPVQEAWAEDVDLR.V
8880		853.094	3	51.6227		62.89					1	468-489					R.GIFPVLCKDPVQEAWAEDVDLR.V
7369		821.89	2	44.4803		55.84					0	476-489					K.DPVQEAWAEDVDLR.V
7374		821.888	2	44.5185		68.11					0	476-489					K.DPVQEAWAEDVDLR.V
7408		821.888	2	44.6687		73.17					0	476-489					K.DPVQEAWAEDVDLR.V
4240		980.486	1	30.0063		15.06					0	490-498					R.VNFAMNVGK.A
3855		979.504	1	28.1981		30.31					0	490-498					R.VNFAMNVGK.A
2387		995.496	1	21.602		35.8					0	490-498					R.VNFAMNVGK.A
3846		979.502	1	28.1517		49.12					0	490-498					R.VNFAMNVGK.A
2403		995.497	1	21.6594		52.28					0	490-498					R.VNFAMNVGK.A
2866		498.743	2	23.8015		16.72					0	490-498					R.VNFAMNVGK.A
2470		498.252	2	21.9672		24.75					0	490-498					R.VNFAMNVGK.A
2379		498.252	2	21.5896		27.26					0	490-498					R.VNFAMNVGK.A
3847		490.254	2	28.1829		27.37					0	490-498					R.VNFAMNVGK.A
2846		498.743	2	23.6879		27.97					0	490-498					R.VNFAMNVGK.A
3938		490.254	2	28.5836		28.79					0	490-498					R.VNFAMNVGK.A
2367		498.252	2	21.5369		30.03					0	490-498					R.VNFAMNVGK.A
1690		611.82	2	18.4187		26.2					1	490-500					R.VNFAMNVGKAR.G
1700		611.817	2	18.4727		38.77					1	490-500					R.VNFAMNVGKAR.G
2806		603.82	2	23.5317		40.1					1	490-500					R.VNFAMNVGKAR.G
2813		603.824	2	23.5665		43.19					1	490-500					R.VNFAMNVGKAR.G
5864		671.893	2	37.5959		50.71					1	505-516					K.KGDVVIVLTGWR.P
5855		671.894	2	37.5531		65.99					1	505-516					K.KGDVVIVLTGWR.P
5868		448.265	3	37.604		35.91					1	505-516					K.KGDVVIVLTGWR.P
5858		448.265	3	37.5595		36.23					1	505-516					K.KGDVVIVLTGWR.P
6143		803.089	3	38.8637		25.32					2	505-526					K.KGDVVIVLTGWRPGSGFTNTMR.V
6142		803.088	3	38.8338		25.7					2	505-526					K.KGDVVIVLTGWRPGSGFTNTMR.V
6211		803.089	3	39.1351		41.73					2	505-526					K.KGDVVIVLTGWRPGSGFTNTMR.V
6601		797.754	3	40.9435		46.61					2	505-526					K.KGDVVIVLTGWRPGSGFTNTMR.V
6612		797.757	3	40.993		78.08					2	505-526					K.KGDVVIVLTGWRPGSGFTNTMR.V
6195		803.089	3	39.0743		79.92					2	505-526					K.KGDVVIVLTGWRPGSGFTNTMR.V
6146		602.568	4	38.8671		15.63					2	505-526					K.KGDVVIVLTGWRPGSGFTNTMR.V
6182		602.568	4	39.0186		16.32					2	505-526					K.KGDVVIVLTGWRPGSGFTNTMR.V
6169		602.568	4	38.9679		20.75					2	505-526					K.KGDVVIVLTGWRPGSGFTNTMR.V
6615		598.569	4	40.9963		28.91					2	505-526					K.KGDVVIVLTGWRPGSGFTNTMR.V
7357		760.39	3	44.4293		26.64					1	506-526					K.GDVVIVLTGWRPGSGFTNTMR.V
7840		755.057	3	46.6082		29.23					1	506-526					K.GDVVIVLTGWRPGSGFTNTMR.V
7383		760.39	3	44.5656		37.36					1	506-526					K.GDVVIVLTGWRPGSGFTNTMR.V
7847		755.06	3	46.6514		39.73					1	506-526					K.GDVVIVLTGWRPGSGFTNTMR.V
7362		760.389	3	44.4678		46.19					1	506-526					K.GDVVIVLTGWRPGSGFTNTMR.V
7396		760.39	3	44.6178		53.94					1	506-526					K.GDVVIVLTGWRPGSGFTNTMR.V
1141		542.246	2	15.462		24.24					0	517-526					R.PGSGFTNTMR.V
2000		534.25	2	19.8791		29.85					0	517-526					R.PGSGFTNTMR.V
1177		542.246	2	15.6471		32.53					0	517-526					R.PGSGFTNTMR.V
1162		542.246	2	15.5704		35.48					0	517-526					R.PGSGFTNTMR.V
1145		542.245	2	15.4781		40.26					0	517-526					R.PGSGFTNTMR.V
2009		534.249	2	19.9253		63.78					0	517-526					R.PGSGFTNTMR.V
3754		510.328	1	27.7424		16.24					0	527-531					R.VVPVP.-
3746		510.328	1	27.6987		17.57					0	527-531					R.VVPVP.-
SPOT: 19							Pyruvate kinase PKM OS=Homo sapiens OX=9606 GN=PKM PE=1 SV=4
Accession:							KPYM_HUMAN														Score:						1000.8
Database:							SwissProt														MW [kDa]:						57.9
Seq. Coverage [%]:							0.48														pI:						7.95506
																					No. of Peptides:						26
Modification(s):									Carbamidomethyl, Oxidation, Deamidated
Cmpd.		m/z meas.	z	Rt [min]		Score					P	Range					Sequence
5069		599.325	2	35.443		29.31					0	33-43					R.LDIDSPPITAR.N
5093		599.328	2	35.5393		37.08					0	33-43					R.LDIDSPPITAR.N
5105		599.327	2	35.5888		56.83					0	33-43					R.LDIDSPPITAR.N
4346		680.354	2	31.9547		41.98					0	44-56					R.NTGIICTIGPASR.S
4404		680.355	2	32.2319		43.45					0	44-56					R.NTGIICTIGPASR.S
4339		680.354	2	31.9194		50.6					0	44-56					R.NTGIICTIGPASR.S
4352		680.354	2	31.9861		52.81					0	44-56					R.NTGIICTIGPASR.S
4335		680.354	2	31.8968		54.26					0	44-56					R.NTGIICTIGPASR.S
316		676.389	1	11.0904		22.62					0	57-62					R.SVETLK.E
321		676.387	1	11.1339		23.7					0	57-62					R.SVETLK.E
301		676.386	1	10.9784		23.77					0	57-62					R.SVETLK.E
298		676.386	1	10.9581		26.01					0	57-62					R.SVETLK.E
312		676.384	1	11.0614		26.9					0	57-62					R.SVETLK.E
325		676.386	1	11.1661		29.33					0	57-62					R.SVETLK.E
327		676.386	1	11.1831		29.38					0	57-62					R.SVETLK.E
324		676.385	1	11.1517		31					0	57-62					R.SVETLK.E
304		676.386	1	10.9979		31.56					0	57-62					R.SVETLK.E
317		676.387	1	11.1034		34.46					0	57-62					R.SVETLK.E
307		676.387	1	11.0282		38.55					0	57-62					R.SVETLK.E
310		676.384	1	11.047		38.69					0	57-62					R.SVETLK.E
8350		822.434	3	50.7518		35.12					0	93-115					R.TATESFASDPILYRPVAVALDTK.G
8338		822.434	3	50.7013		44.86					0	93-115					R.TATESFASDPILYRPVAVALDTK.G
8325		822.431	3	50.651		46.76					0	93-115					R.TATESFASDPILYRPVAVALDTK.G
458		531.348	1	12.8668		21.4					0	121-125					R.TGLIK.G
441		531.348	1	12.686		26.93					0	121-125					R.TGLIK.G
442		531.349	1	12.696		28.37					0	121-125					R.TGLIK.G
1064		495.758	2	16.9828		23.01					0	126-135					K.GSGTAEVELK.K
1043		495.758	2	16.8712		27.68					0	126-135					K.GSGTAEVELK.K
4248		599.294	2	31.5363		22.25					0	142-151					K.ITLDNAYMEK.C
4258		599.293	2	31.5737		23.34					0	142-151					K.ITLDNAYMEK.C
7442		890.438	2	46.7533		34.74					0	189-206					K.GADFLVTEVENGGSLGSK.K
7207		890.931	2	45.589		38.08					0	189-206					K.GADFLVTEVENGGSLGSK.K
7462		890.44	2	46.854		38.31					0	189-206					K.GADFLVTEVENGGSLGSK.K
7785		890.935	2	48.2446		39.65					0	189-206					K.GADFLVTEVENGGSLGSK.K
7812		890.928	2	48.3755		45.46					0	189-206					K.GADFLVTEVENGGSLGSK.K
7801		890.93	2	48.324		48.62					0	189-206					K.GADFLVTEVENGGSLGSK.K
7450		890.438	2	46.7945		50.15					0	189-206					K.GADFLVTEVENGGSLGSK.K
7235		890.934	2	45.7207		63.55					0	189-206					K.GADFLVTEVENGGSLGSK.K
7214		890.932	2	45.6263		66.52					0	189-206					K.GADFLVTEVENGGSLGSK.K
7460		890.441	2	46.8406		67.74					0	189-206					K.GADFLVTEVENGGSLGSK.K
7224		890.932	2	45.6716		68.67					0	189-206					K.GADFLVTEVENGGSLGSK.K
5571		882.996	2	37.8069		24.33					1	207-224					K.KGVNLPGAAVDLPAVSEK.D
5587		589.001	3	37.8795		29.04					1	207-224					K.KGVNLPGAAVDLPAVSEK.D
5570		588.998	3	37.8047		42.33					1	207-224					K.KGVNLPGAAVDLPAVSEK.D
7145		818.947	2	45.2729		35.52					0	208-224					K.GVNLPGAAVDLPAVSEK.D
7087		818.949	2	45.057		42.56					0	208-224					K.GVNLPGAAVDLPAVSEK.D
7180		818.946	2	45.4191		50.46					0	208-224					K.GVNLPGAAVDLPAVSEK.D
7099		818.947	2	45.109		59.62					0	208-224					K.GVNLPGAAVDLPAVSEK.D
7111		818.947	2	45.1597		66.87					0	208-224					K.GVNLPGAAVDLPAVSEK.D
1361		731.39	1	18.5181		27.3					0	225-230					K.DIQDLK.F
1371		731.391	1	18.5637		35.24					0	225-230					K.DIQDLK.F
1377		731.391	1	18.6032		37.82					0	225-230					K.DIQDLK.F
119		520.775	2	9.66586		20.4					1	247-255					R.KASDVHEVR.K
121		520.776	2	9.68152		23.72					1	247-255					R.KASDVHEVR.K
116		520.776	2	9.63692		24.35					1	247-255					R.KASDVHEVR.K
113		520.777	2	9.60735		32.14					1	247-255					R.KASDVHEVR.K
107		520.776	2	9.58047		35.44					1	247-255					R.KASDVHEVR.K
105		520.776	2	9.56536		49.57					1	247-255					R.KASDVHEVR.K
120		347.521	3	9.66779		21.12					1	247-255					R.KASDVHEVR.K
111		347.522	3	9.60461		35.64					1	247-255					R.KASDVHEVR.K
126		477.242	2	9.72369		22.87					0	271-278					K.IENHEGVR.R
132		477.242	2	9.76009		31.15					0	271-278					K.IENHEGVR.R
6592		613.307	3	42.7281		26.29					1	279-294					R.RFDEILEASDGIMVAR.G
6640		613.308	3	42.9517		35.73					1	279-294					R.RFDEILEASDGIMVAR.G
6600		613.307	3	42.7607		36					1	279-294					R.RFDEILEASDGIMVAR.G
7552		607.977	3	47.2546		36.38					1	279-294					R.RFDEILEASDGIMVAR.G
6617		613.308	3	42.8475		45.77					1	279-294					R.RFDEILEASDGIMVAR.G
6608		613.307	3	42.8001		48.85					1	279-294					R.RFDEILEASDGIMVAR.G
6628		613.308	3	42.899		49.57					1	279-294					R.RFDEILEASDGIMVAR.G
7564		607.976	3	47.3024		51.18					1	279-294					R.RFDEILEASDGIMVAR.G
7588		607.977	3	47.4085		52.86					1	279-294					R.RFDEILEASDGIMVAR.G
7576		607.976	3	47.355		56.44					1	279-294					R.RFDEILEASDGIMVAR.G
6644		613.308	3	42.9572		56.47					1	279-294					R.RFDEILEASDGIMVAR.G
7599		607.976	3	47.4589		63.4					1	279-294					R.RFDEILEASDGIMVAR.G
8279		833.413	2	50.4516		33.46					0	280-294					R.FDEILEASDGIMVAR.G
8268		833.415	2	50.4015		38.79					0	280-294					R.FDEILEASDGIMVAR.G
7215		841.405	2	45.6283		40.48					0	280-294					R.FDEILEASDGIMVAR.G
7225		841.406	2	45.6736		44.44					0	280-294					R.FDEILEASDGIMVAR.G
8289		833.409	2	50.4982		55.32					0	280-294					R.FDEILEASDGIMVAR.G
5442		571.309	2	37.2128		26.36					0	295-305					R.GDLGIEIPAEK.V
5429		571.309	2	37.1613		26.41					0	295-305					R.GDLGIEIPAEK.V
5425		571.308	2	37.1255		26.77					0	295-305					R.GDLGIEIPAEK.V
5454		571.309	2	37.2652		28.67					0	295-305					R.GDLGIEIPAEK.V
5406		571.308	2	37.0581		30.59					0	295-305					R.GDLGIEIPAEK.V
1263		705.427	1	17.9787		20.79					0	306-311					K.VFLAQK.M
1189		705.428	1	17.6353		21.42					0	306-311					K.VFLAQK.M
1241		705.429	1	17.8831		22.68					0	306-311					K.VFLAQK.M
1200		705.428	1	17.6933		27.28					0	306-311					K.VFLAQK.M
1196		705.429	1	17.6699		34.62					0	306-311					K.VFLAQK.M
8390		1255.57	2	50.9127		29.05					0	343-367					R.AEGSDVANAVLDGADCIMLSGETAK.G
8389		837.384	3	50.9106		24.26					0	343-367					R.AEGSDVANAVLDGADCIMLSGETAK.G
8376		837.382	3	50.859		25.43					0	343-367					R.AEGSDVANAVLDGADCIMLSGETAK.G
3754		510.26	2	29.2306		31.64					0	368-376					K.GDYPLEAVR.M
220		442.741	2	10.53		20.97					0	377-383					R.MQHLIAR.E
197		442.74	2	10.4345		26.27					0	377-383					R.MQHLIAR.E
8925		1088.06	2	53.1992		23.89					0	401-422					R.LAPITSDPTEATAVGAVEASFK.C
8910		1088.06	2	53.1434		32.66					0	401-422					R.LAPITSDPTEATAVGAVEASFK.C
8898		1088.06	2	53.0945		36.62					0	401-422					R.LAPITSDPTEATAVGAVEASFK.C
2833		840.529	1	25.266		20.72					0	448-455					R.APIIAVTR.N
2841		840.526	1	25.299		31.72					0	448-455					R.APIIAVTR.N
2869		420.769	2	25.4207		27.66					0	448-455					R.APIIAVTR.N
2864		420.769	2	25.4133		31.03					0	448-455					R.APIIAVTR.N
2857		420.769	2	25.3746		33.7					0	448-455					R.APIIAVTR.N
2813		420.769	2	25.1952		37.78					0	448-455					R.APIIAVTR.N
2827		420.769	2	25.2478		43.28					0	448-455					R.APIIAVTR.N
2848		420.769	2	25.3354		49.06					0	448-455					R.APIIAVTR.N
7865		821.886	2	48.6246		54.2					0	476-489					K.DPVQEAWAEDVDLR.V
7888		821.885	2	48.7251		63.6					0	476-489					K.DPVQEAWAEDVDLR.V
7876		821.888	2	48.6736		74.19					0	476-489					K.DPVQEAWAEDVDLR.V

## Sheet: 02-Maxquant Evidence PKM2
Number	Protein Name	Sequence	Unique (Groups)	Unique (Proteins)	Retention time	MS/MS m/z
1		LDIDSPPITAR	no	no	27.653	599.33
2		NTGIICTIGPASR	no	no	25.411	680.36
3a		LNFSHGTHEYHAETIK	no	no	15.859	942.457
3b					15.87	628.978
4a		TATESFASDPILYR	no	no	31.026	785.893
4b					31.012	524.597
5		PVAVALDTK	no	no	18.332	457.272
6		GSGTAEVELK	no	no	13.552	495.759
6a					13.552	495.759
6b					13.551	991.495
7		ITLDNAYME	no	no	21.408	599.295
8		CDENILWLDYK	no	no	53.829	734.847
9a		IYVDDGLISLQVK	no	no	46.143	731.916
9b					46.137	488.276
10a		GADFLVTEVENGGSLGSK	no	no	36.39	890.936
10b					36.398	594.293
11a		GVNLPGAAVDLPAVSEK	no	no	43.282	818.953
11b					43.28	546.303
12a		FGVEQDVDMVFASFIR	no	no	77.817	938.956
12b					77.802	626.309
13		FDEILEASDGIMVAR	no	no	43.929	556.279
14		GDLGIEIPAEK	no	no	29.735	571.311
15		AEGSDVANAVLDGADCIMLSGETAK	no	no	46.197	1256.08
15a					46.197	837.721
15b					46.194	1248.08
16		GDYPLEAVR	no	no	20.617	510.261
17		MQHLIAR	no	no	14.223	434.745
18a	PKM2	EAEAAIYHLQLFEELR	yes	no	52.648	967
18b					52.636	645.004
19a	PKM2	LAPITSDPTEATAVGAVEASFK	yes	no	50.618	1088.56
19b					50.621	725.714
20	PKM2	CCSGAIIVLTK	yes	no	27.558	611.323
21		APIIAVTR	no	no	21.007	420.766
22		GIFPVLCK	no	no	39.365	467.264
23a		DPVQEAWAEDVDLR	no	no	37.394	821.892
23b					37.417	548.596
24		VNFAMNVGK	no	no	22.313	490.255
25a		SKPHSEAGTAFIQTQQLHAAMADTFLEHMCR	no	no	51.953	890.175
25b					51.978	1186.56
