# Supplementary material for: A Practical and Analytical Comparative Study of Gel-Based Top-Down and Gel-Free Bottom-Up Proteomics Including Unbiased Proteoform Detection
Source: Cells. 2023 Feb 26;12(5):747. doi: 10.3390/cells12050747 (PMC10000902; doi:10.3390/cells12050747)
Supplement: Supplementary file 1 [file cells-12-00747-s001.zip › Table S3_MaxQuant result tables for selected proteins.xlsx]

## Sheet: 02-proteinGroups
ProteinGroups.txt result table of selected proteins in three biological replica
proteinGroups-id	Protein IDs	Majority protein IDs	Protein names	Gene names	LFQ intensity 1_T383-1_WT-P20	LFQ intensity 3_T389-2_WT-P18	LFQ intensity 5_T395-3_WT-P16	iBAQ 1_T383-1_WT-P20	iBAQ 3_T389-2_WT-P18	iBAQ 5_T395-3_WT-P16	Peptide counts (all)	Peptide counts (razor+unique)	Peptide counts (unique)	Number of proteins	Peptides	Razor + unique peptides	Unique peptides	Sequence coverage [%]	Unique + razor sequence coverage [%]	Unique sequence coverage [%]	Mol. weight [kDa]	Q-value	Score	Intensity	iBAQ	iBAQ peptides	MS/MS count	MS/MS count 1_T383-1_WT-P20	MS/MS count 3_T389-2_WT-P18	MS/MS count 5_T395-3_WT-P16	Intensity 1_T383-1_WT-P20	Intensity 3_T389-2_WT-P18	Intensity 5_T395-3_WT-P16	Sequence coverage 1_T383-1_WT-P20 [%]	Sequence coverage 3_T389-2_WT-P18 [%]	Sequence coverage 5_T395-3_WT-P16 [%]	Peptides 1_T383-1_WT-P20	Peptides 3_T389-2_WT-P18	Peptides 5_T395-3_WT-P16	Razor + unique peptides 1_T383-1_WT-P20	Razor + unique peptides 3_T389-2_WT-P18	Razor + unique peptides 5_T395-3_WT-P16	Unique peptides 1_T383-1_WT-P20	Unique peptides 3_T389-2_WT-P18	Unique peptides 5_T395-3_WT-P16	Peptide sequences	Fasta headers	Peptide IDs	Peptide is razor
1411	P14618;P14618-3;B4DNK4;H3BUW1;H3BTJ2;H3BT25;H3BU13;H3BN34;H3BQZ3;P30613-2	P14618;P14618-3;B4DNK4	Pyruvate kinase PKM;Pyruvate kinase	PKM	2741100000	2721900000	2477500000	488020000	234860000	204770000	NaN	NaN	NaN	10	43	43	5	78.3	78.3	9.4	57.936	0	323.31	49554000000	927640000	33	344	134	105	105	26318000000	12560000000	10676000000	76.8	77.2	74.6	41	40	38	41	40	38	5	5	4	AEGSDVANAVLDGADCIMLSGETAK;AGKPVICATQMLESMIK;APIIAVTR;ASDVHEVRK;CCSGAIIVLTK;CDENILWLDYK;DPVQEAWAEDVDLR;EAEAAIYHLQLFEELR;EAEAAIYHLQLFEELRR;FDEILEASDGIMVAR;FGVEQDVDMVFASFIR;FGVEQDVDMVFASFIRK;GADFLVTEVENGGSLGSK;GDLGIEIPAEK;GDVVIVLTGWRPGSGFTNTMR;GDYPLEAVR;GIFPVLCK;GIFPVLCKDPVQEAWAEDVDLR;GSGTAEVELK;GSGTAEVELKK;GVNLPGAAVDLPAVSEK;GVNLPGAAVDLPAVSEKDIQDLK;IENHEGVR;ITLDNAYMEK;IYVDDGLISLQVK;KASDVHEVR;KGDVVIV…	sp|P14618|KPYM_HUMAN Pyruvate kinase PKM OS=Homo sapiens OX=9606 GN=PKM PE=1 SV=4;sp|P14618-3|KPYM_HUMAN Isoform of P14618, Isoform 3 of Pyruvate kinase PKM OS=Homo sapiens OX=9606 GN=PKM;tr|B4DNK4|B4DNK4_HUMAN Isoform of P14618, Pyruvate kinase OS=Homo sa	380;580;1203;1370;1762;1767;2775;3118;3119;4491;4705;4706;5308;5440;5478;5484;5805;5806;6282;6283;6439;6440;7274;8267;8476;8506;8659;8707;8708;9081;9235;10401;11718;12526;12798;12802;13488;13586;14358;15143;15144;15145;17338	NaN;NaN;NaN;NaN;NaN;NaN;NaN;NaN;NaN;NaN;NaN;NaN;NaN;NaN;NaN;NaN;NaN;NaN;NaN;NaN;NaN;NaN;NaN;NaN;NaN;NaN;NaN;NaN;NaN;NaN;NaN;NaN;NaN;NaN;NaN;NaN;NaN;NaN;NaN;NaN;NaN;NaN;NaN
1412	P14618-2;H3BTN5;H3BR70;H3BQ34	P14618-2;H3BTN5;H3BR70;H3BQ34	Pyruvate kinase PKM;Pyruvate kinase	PKM	NaN	NaN	NaN	1049900	79789	195040	NaN	NaN	NaN	4	41	3	3	74.6	5.6	5.6	58.061	0	8.4996	45042000	1324800	34	3	2	1	0	35698000	2712800	6631500	71.4	70.4	68.9	38	36	35	2	1	1	2	1	1	AEGSDVANAVLDGADCIMLSGETAK;AGKPVICATQMLESMIK;APIIAVTR;ASDVHEVRK;CDENILWLDYK;CLAAALIVLTESGR;DPVQEAWAEDVDLR;EAEAAMFHR;FDEILEASDGIMVAR;FGVEQDVDMVFASFIR;FGVEQDVDMVFASFIRK;GADFLVTEVENGGSLGSK;GDLGIEIPAEK;GDVVIVLTGWRPGSGFTNTMR;GDYPLEAVR;GIFPVLCK;GIFPVLCKDPVQEAWAEDVDLR;GSGTAEVELK;GSGTAEVELKK;GVNLPGAAVDLPAVSEK;GVNLPGAAVDLPAVSEKDIQDLK;IENHEGVR;ITLDNAYMEK;IYVDDGLISLQVK;KASDVHEVR;KGDVVIVLTGWRPGSGFTNTMR;KGVNLP…	sp|P14618-2|KPYM_HUMAN Isoform of P14618, Isoform M1 of Pyruvate kinase PKM OS=Homo sapiens OX=9606 GN=PKM;tr|H3BTN5|H3BTN5_HUMAN Isoform of P14618, Pyruvate kinase (Fragment) OS=Homo sapiens OX=9606 GN=PKM PE=1 SV=1;tr|H3BR70|H3BR70_HUMAN Isoform of P1461	380;580;1203;1370;1767;1844;2775;3120;4491;4705;4706;5308;5440;5478;5484;5805;5806;6282;6283;6439;6440;7274;8267;8476;8506;8659;8707;8708;9235;9491;10401;11718;12526;12798;12802;13488;14358;15143;15144;15145;17338	NaN;NaN;NaN;NaN;NaN;NaN;NaN;NaN;NaN;NaN;NaN;NaN;NaN;NaN;NaN;NaN;NaN;NaN;NaN;NaN;NaN;NaN;NaN;NaN;NaN;NaN;NaN;NaN;NaN;NaN;NaN;NaN;NaN;NaN;NaN;NaN;NaN;NaN;NaN;NaN;NaN
1276	P04406;P04406-2;E7EUT5	P04406;P04406-2;E7EUT5	Glyceraldehyde-3-phosphate dehydrogenase	GAPDH	2845600000	3776200000	3670400000	817440000	497910000	434780000	NaN	NaN	NaN	3	20	20	19	77.6	77.6	75.5	36.053	0	276.82	48140000000	1750100000	17	314	101	107	106	22036000000	13744000000	12360000000	77.6	65.1	66.9	20	16	17	20	16	17	19	15	16	GALQNIIPASTGAAK;GILGYTEHQVVSSDFNSDTHSSTFDAGAGIALNDHFVK;IISNASCTTNCLAPLAK;LISWYDNEFGYSNR;LTGMAFR;LVINGNPITIFQER;LVINGNPITIFQERDPSK;LVINGNPITIFQERDPSKIK;LWRDGRGALQNIIPASTGAAK;RVIISAPSADAPMFVMGVNHEK;VDIVAINDPFIDLNYMVYMFQYDSTHGK;VGVNGFGR;VIHDNFGIVEGLMTTVHAITATQK;VIISAPSADAPMFVMGVNHEK;VIPELNGK;VPTANVSVVDLTCR;VPTANVSVVDLTCRLEKPAK;VVDLMAHMASK;VVDLMAHMASKE;WGDAGAEYVVESTGVFTTMEK	sp|P04406|G3P_HUMAN Glyceraldehyde-3-phosphate dehydrogenase OS=Homo sapiens OX=9606 GN=GAPDH PE=1 SV=3;sp|P04406-2|G3P_HUMAN Isoform of P04406, Isoform 2 of Glyceraldehyde-3-phosphate dehydrogenase OS=Homo sapiens OX=9606 GN=GAPDH;tr|E7EUT5|E7EUT5_HUMAN I	5346;5825;7639;9923;10969;11150;11151;11152;11287;13759;16500;16860;16945;16951;16973;17466;17467;17794;17795;18007	NaN;NaN;NaN;NaN;NaN;NaN;NaN;NaN;NaN;NaN;NaN;NaN;NaN;NaN;NaN;NaN;NaN;NaN;NaN;NaN
1881	P61981	P61981	14-3-3 protein gamma;14-3-3 protein gamma, N-terminally processed	YWHAG	118000000	128540000	118910000	12927000	12837000	11498000	11	8	8	1	11	8	8	51.8	40.9	40.9	28.302	0	64.88	789910000	37262000	16	27	9	9	9	344830000	228680000	216400000	46.2	44.1	40.1	10	10	9	7	7	6	7	7	6	AYSEAHEISK;DSTLIMQLLR;EHMQPTHPIR;ELEAVCQDVLSLLDNYLIK;NLLSVAYK;NVTELNEPLSNEER;RATVVESSEK;TAFDDAIAELDTLNEDSYK;VDREQLVQK;YDDMAAAMK;YLAEVATGEK	sp|P61981|1433G_HUMAN 14-3-3 protein gamma OS=Homo sapiens OX=9606 GN=YWHAG PE=1 SV=2	1735;2886;3589;3743;12281;12640;13434;15099;16529;18157;18405	NaN;NaN;NaN;NaN;NaN;NaN;NaN;NaN;NaN;NaN;NaN
1845	P60842;P60842-2;J3KT12;J3QS69;J3KTB5;J3KSZ0;J3QL43;J3KTN0;J3QR64;J3QLN6;J3KS25;J3QKZ9;J3KT04;J3KS93;J3KSN7;E7EMV8;J3QQP0;J3QL52	P60842;P60842-2;J3KT12;J3QS69;J3KTB5;J3KSZ0;J3QL43	Eukaryotic initiation factor 4A-I	EIF4A1	589350000	588180000	751760000	97159000	41880000	49208000	NaN	NaN	NaN	18	23	23	10	50	50	23.6	46.153	0	253.01	5769900000	188250000	23	99	32	33	34	2900300000	1299700000	1569900000	49.5	49.8	43.6	20	22	20	20	22	20	9	10	10	AILPCIK;DFTVSAMHGDMDQK;DQIYDIFQK;FMRDPIR;GFKDQIYDIFQK;GIDVQQVSLVINYDLPTNR;GIYAYGFEK;GIYAYGFEKPSAIQQR;GVAINMVTEEDKR;GYDVIAQAQSGTGK;KEELTLEGIR;KGVAINMVTEEDKR;KVDWLTEK;LNSNTQVVLLSATMPSDVLEVTK;LNSNTQVVLLSATMPSDVLEVTKK;LQMEAPHIIVGTPGR;MFVLDEADEMLSR;QFYINVER;QFYINVEREEWK;VDWLTEK;VFDMLNR;VFDMLNRR;VLITTDLLAR	sp|P60842|IF4A1_HUMAN Eukaryotic initiation factor 4A-I OS=Homo sapiens OX=9606 GN=EIF4A1 PE=1 SV=1;sp|P60842-2|IF4A1_HUMAN Isoform of P60842, Isoform 2 of Eukaryotic initiation factor 4A-I OS=Homo sapiens OX=9606 GN=EIF4A1;tr|J3KT12|J3KT12_HUMAN Isoform o	752;2224;2799;4930;5625;5790;5880;5881;6392;6504;8572;8703;8914;10453;10454;10682;11516;12973;12974;16549;16689;16690;17149	NaN;NaN;NaN;NaN;NaN;NaN;NaN;NaN;NaN;NaN;NaN;NaN;NaN;NaN;NaN;NaN;NaN;NaN;NaN;NaN;NaN;NaN;NaN
1311	P07237;H7BZ94;H0Y3Z3;I3L398;I3L312;I3L4M2;I3NI03;I3L0S0;I3L3U6;I3L3P5;I3L1Y5;I3L514	P07237;H7BZ94;H0Y3Z3	Protein disulfide-isomerase	P4HB	380920000	418840000	395170000	94076000	40455000	39942000	NaN	NaN	NaN	12	29	29	29	57.7	57.7	57.7	57.116	0	196.31	8234500000	174470000	35	143	51	47	45	4347900000	1969100000	1917500000	57.5	50	51.6	28	26	27	28	26	27	28	26	27	DGVVLFK;DHENIVIAK;EADDIVNWLK;ENLLDFIK;FFPASADR;HNQLPLVIEFTEQTAPK;IFGGEIK;IKPHLMSQELPEDWDKQPVK;ILEFFGLK;ILFIFIDSDHTDNQR;ITEFCHR;KSNFAEALAAHK;LITLEEEMTK;MDSTANEVEAVK;NFEDVAFDEK;NFEDVAFDEKK;NNFEGEVTK;NNFEGEVTKENLLDFIK;QFLQAAEAIDDIPFGITSNSDVFSK;QLAPIWDK;RTGPAATTLPDGAAAESLVESSEVAVIGFFK;SNFAEALAAHK;TGPAATTLPDGAAAESLVESSEVAVIGFFK;THILLFLPK;TVIDYNGER;VDATEESDLAQQYGVR;VHSFPTLK;YKPESEELTAER;YQLDKDGVVLFK	sp|P07237|PDIA1_HUMAN Protein disulfide-isomerase OS=Homo sapiens OX=9606 GN=P4HB PE=1 SV=3;tr|H7BZ94|H7BZ94_HUMAN Isoform of P07237, Protein disulfide-isomerase OS=Homo sapiens OX=9606 GN=P4HB PE=1 SV=2;tr|H0Y3Z3|H0Y3Z3_HUMAN Isoform of P07237, Protein di	2321;2334;3113;3969;4615;6826;7338;7674;7725;7736;8238;8898;9928;11429;12018;12019;12370;12371;12965;13088;13737;14602;15442;15483;16138;16444;16888;18393;18552	NaN;NaN;NaN;NaN;NaN;NaN;NaN;NaN;NaN;NaN;NaN;NaN;NaN;NaN;NaN;NaN;NaN;NaN;NaN;NaN;NaN;NaN;NaN;NaN;NaN;NaN;NaN;NaN;NaN
1320	P07858;R4GMQ5;E9PR54;E9PJ67;E9PCB3;E9PKQ7;E9PNL5;E9PHZ5;E9PLY3;E9PSG5;E9PQM1	P07858	Cathepsin B;Cathepsin B light chain;Cathepsin B heavy chain	CTSB	51517000	82179000	66990000	3829800	1520700	456190	NaN	NaN	NaN	11	5	5	5	20.6	20.6	20.6	37.821	0	63.569	186500000	5806600	19	10	4	3	3	72766000	68623000	45113000	15.6	12.1	12.1	4	3	3	4	3	3	4	3	3	EQWPQCPTIK;GQDHCGIESEVVAGIPR;HYGYNSYSVSNSEK;ICEPGYSPTYK;NGPVEGAFSVYSDFLLYK	sp|P07858|CATB_HUMAN Cathepsin B OS=Homo sapiens OX=9606 GN=CTSB PE=1 SV=3	4086;6213;6995;7113;12081	NaN;NaN;NaN;NaN;NaN
Selected proteinGroups.txt results for proteins associated to figure 9 (phosphatase-treatment, 2D-DIGE) obtained from Orbitrap QExactive-analysis
proteinGroups-id	Protein IDs	Majority protein IDs	Protein names	Gene names	LFQ intensity 1_T383-1_WT-P20	LFQ intensity 3_T389-2_WT-P18	LFQ intensity 5_T395-3_WT-P16	iBAQ 1_T383-1_WT-P20	iBAQ 3_T389-2_WT-P18	iBAQ 5_T395-3_WT-P16	Peptide counts (all)	Peptide counts (razor+unique)	Peptide counts (unique)	Number of proteins	Peptides	Razor + unique peptides	Unique peptides	Sequence coverage [%]	Unique + razor sequence coverage [%]	Unique sequence coverage [%]	Mol. weight [kDa]	Q-value	Score	Intensity	iBAQ	iBAQ peptides	MS/MS count	MS/MS count 1_T383-1_WT-P20	MS/MS count 3_T389-2_WT-P18	MS/MS count 5_T395-3_WT-P16	Intensity 1_T383-1_WT-P20	Intensity 3_T389-2_WT-P18	Intensity 5_T395-3_WT-P16	Sequence coverage 1_T383-1_WT-P20 [%]	Sequence coverage 3_T389-2_WT-P18 [%]	Sequence coverage 5_T395-3_WT-P16 [%]	Peptides 1_T383-1_WT-P20	Peptides 3_T389-2_WT-P18	Peptides 5_T395-3_WT-P16	Razor + unique peptides 1_T383-1_WT-P20	Razor + unique peptides 3_T389-2_WT-P18	Razor + unique peptides 5_T395-3_WT-P16	Unique peptides 1_T383-1_WT-P20	Unique peptides 3_T389-2_WT-P18	Unique peptides 5_T395-3_WT-P16	Peptide sequences	Fasta headers	Peptide IDs	Peptide is razor
1639	P37837;F2Z393;E9PM01;E9PKI8	P37837;F2Z393	Transaldolase	TALDO1	210330000	239880000	232560000	47150000	19700000	18690000	NaN	NaN	NaN	4	11	11	11	34.1	34.1	34.1	37.54	0	45.3	1494500000	85540000	17	25	10	7	8	823370000	345480000	325640000	31.5	18.4	22	10	6	7	10	6	7	10	6	7	ALAGCDFLTISPK;FAADAVK;ILDWHVANTDKK;LFVLFGAEILK;LLGELLQDNAK;LSSTWEGIQAGK;LVPVLSAK;MESALDQLK;SYEPLEDPGVK;TIVMGASFR;WLHNEDQMAVEK	sp|P37837|TALDO_HUMAN Transaldolase OS=Homo sapiens OX=9606 GN=TALDO1 PE=1 SV=2;tr|F2Z393|F2Z393_HUMAN Isoform of P37837, Transaldolase OS=Homo sapiens OX=9606 GN=TALDO1 PE=1 SV=1	831;4389;7720;9583;10119;10901;11196;11485;15046;15605;18029	NaN;NaN;NaN;NaN;NaN;NaN;NaN;NaN;NaN;NaN;NaN
1984	Q01518;Q5T0R7;Q5T0R6;Q5T0R5;Q5T0R4;Q5T0R3;Q5T0R2;Q5T0R1;Q5T0S3;Q5T0R8	Q01518	Adenylyl cyclase-associated protein 1	CAP1	219580000	257300000	274990000	20566000	16066000	14883000	NaN	NaN	NaN	10	20	20	1	53.9	53.9	4.8	51.901	0	135.51	1799800000	51515000	28	62	23	22	17	775740000	530150000	493900000	46.5	48.8	39.4	16	17	14	16	17	14	1	1	1	AGAAPYVQAFDSLLAGPVAEYLK;ALLVTASQCQQPAENK;CVNTTLQIK;EMNDAAMFYTNR;HAEMVHTGLK;INSITVDNCK;KEPAVLELEGK;LEAVSHTSDMHR;LFNHLSAVSESIQALGWVAMAPK;LFNHLSAVSESIQALGWVAMAPKPGPYVK;LGLVFDDVVGIVEIINSK;LSDLLAPISEQIK;LSDLLAPISEQIKEVITFR;NSLDCEIVSAK;QVAYIYK;SSEMNVLIPTEGGDFNEFPVPEQFK;TDGCHAYLSK;THKNPALK;VENQENVSNLVIEDTELK;VPTISINK	sp|Q01518|CAP1_HUMAN Adenylyl cyclase-associated protein 1 OS=Homo sapiens OX=9606 GN=CAP1 PE=1 SV=5	541;986;1941;3938;6558;7951;8606;9332;9542;9543;9711;10793;10794;12487;13323;14780;15214;15487;16631;17469	NaN;NaN;NaN;NaN;NaN;NaN;NaN;NaN;NaN;NaN;NaN;NaN;NaN;NaN;NaN;NaN;NaN;NaN;NaN;NaN
1985	Q01518-2;Q5T0R9	Q01518-2	Adenylyl cyclase-associated protein 1	CAP1	NaN	NaN	NaN	19412	NaN	NaN	NaN	NaN	NaN	2	20	1	1	53.8	4.6	4.6	51.83	0.00045809	3.6936	1672100	19412	28	2	2	0	0	1672100	0	0	46.4	44.1	34.6	16	16	13	1	0	0	1	0	0	ALLVTASQCQQPAENK;CVNTTLQIK;EMNDAAMFYTNR;GAAPYVQAFDSLLAGPVAEYLK;HAEMVHTGLK;INSITVDNCK;KEPAVLELEGK;LEAVSHTSDMHR;LFNHLSAVSESIQALGWVAMAPK;LFNHLSAVSESIQALGWVAMAPKPGPYVK;LGLVFDDVVGIVEIINSK;LSDLLAPISEQIK;LSDLLAPISEQIKEVITFR;NSLDCEIVSAK;QVAYIYK;SSEMNVLIPTEGGDFNEFPVPEQFK;TDGCHAYLSK;THKNPALK;VENQENVSNLVIEDTELK;VPTISINK	sp|Q01518-2|CAP1_HUMAN Isoform of Q01518, Isoform 2 of Adenylyl cyclase-associated protein 1 OS=Homo sapiens OX=9606 GN=CAP1	986;1941;3938;5305;6558;7951;8606;9332;9542;9543;9711;10793;10794;12487;13323;14780;15214;15487;16631;17469	NaN;NaN;NaN;NaN;NaN;NaN;NaN;NaN;NaN;NaN;NaN;NaN;NaN;NaN;NaN;NaN;NaN;NaN;NaN;NaN
75	A0A087WYT3;Q15185-4;Q15185;Q15185-3;B4DDC6;Q15185-2	A0A087WYT3;Q15185-4;Q15185;Q15185-3;B4DDC6	Prostaglandin E synthase 3	PTGES3	492850000	518520000	497170000	142770000	62975000	48868000	NaN	NaN	NaN	6	7	7	7	40.9	40.9	40.9	19.155	0	66.578	2999400000	254620000	8	34	14	10	10	1636000000	757980000	605400000	40.9	40.2	35.4	7	6	5	7	6	5	7	6	5	DVNVNFEK;GESGQSWPR;HLNEIDLFHCIDPNDSK;KGESGQSWPR;LNWLSVDFNNWK;LTFSCLGGSDNFK;SILCCLR	tr|A0A087WYT3|A0A087WYT3_HUMAN Isoform of Q15185, Prostaglandin E synthase 3 OS=Homo sapiens OX=9606 GN=PTGES3 PE=1 SV=1;sp|Q15185-4|TEBP_HUMAN Isoform of Q15185, Isoform 4 of Prostaglandin E synthase 3 OS=Homo sapiens OX=9606 GN=PTGES3;sp|Q15185|TEBP_HUMA	2998;5541;6782;8667;10473;10967;14273	NaN;NaN;NaN;NaN;NaN;NaN;NaN
848	P0DP25;P0DP24;P0DP23;H0Y7A7;E7ETZ0;E7EMB3;F8WBR5;M0QZ52;G3V479;G3V361;Q96HY3;G3V226;P27482;C9J7T9;P02585	P0DP25;P0DP24;P0DP23;H0Y7A7;E7ETZ0;E7EMB3;F8WBR5;M0QZ52;G3V479		CALM2;CALM1;CALM3	115130000	130830000	109090000	25091000	13522000	8329100	NaN	NaN	NaN	15	7	7	7	45.6	45.6	45.6	16.837	0	89.412	694950000	46942000	9	21	7	9	5	366780000	196630000	131540000	43	40.9	38.3	5	6	4	5	6	4	5	6	4	ADQLTEEQIAEFK;DTDSEEEIREAFR;EAFSLFDK;EAFSLFDKDGDGTITTK;ELGTVMR;MKDTDSEEEIR;VFDKDGNGYISAAELR	sp|P0DP25|CALM3_HUMAN Calmodulin-3 OS=Homo sapiens OX=9606 GN=CALM3 PE=1 SV=1;sp|P0DP24|CALM2_HUMAN Calmodulin-2 OS=Homo sapiens OX=9606 GN=CALM2 PE=1 SV=1;sp|P0DP23|CALM1_HUMAN Calmodulin-1 OS=Homo sapiens OX=9606 GN=CALM1 PE=1 SV=1;tr|H0Y7A7|H0Y7A7_HUMAN	319;2899;3141;3142;3784;11584;16687	NaN;NaN;NaN;NaN;NaN;NaN;NaN
ProteinGroups.txt result table of all identified and quantified proteins in three biological replica
proteinGroups-id	Protein IDs	Majority protein IDs	Protein names	Gene names	LFQ intensity 1_T383-1_WT-P20	LFQ intensity 3_T389-2_WT-P18	LFQ intensity 5_T395-3_WT-P16	iBAQ 1_T383-1_WT-P20	iBAQ 3_T389-2_WT-P18	iBAQ 5_T395-3_WT-P16	Peptide counts (all)	Peptide counts (razor+unique)	Peptide counts (unique)	Number of proteins	Peptides	Razor + unique peptides	Unique peptides	Sequence coverage [%]	Unique + razor sequence coverage [%]	Unique sequence coverage [%]	Mol. weight [kDa]	Q-value	Score	Intensity	iBAQ	iBAQ peptides	MS/MS count	MS/MS count 1_T383-1_WT-P20	MS/MS count 3_T389-2_WT-P18	MS/MS count 5_T395-3_WT-P16	Intensity 1_T383-1_WT-P20	Intensity 3_T389-2_WT-P18	Intensity 5_T395-3_WT-P16	Sequence coverage 1_T383-1_WT-P20 [%]	Sequence coverage 3_T389-2_WT-P18 [%]	Sequence coverage 5_T395-3_WT-P16 [%]	Peptides 1_T383-1_WT-P20	Peptides 3_T389-2_WT-P18	Peptides 5_T395-3_WT-P16	Razor + unique peptides 1_T383-1_WT-P20	Razor + unique peptides 3_T389-2_WT-P18	Razor + unique peptides 5_T395-3_WT-P16	Unique peptides 1_T383-1_WT-P20	Unique peptides 3_T389-2_WT-P18	Unique peptides 5_T395-3_WT-P16	Peptide sequences	Fasta headers	Peptide IDs	Peptide is razor
0	A0A024QZX5;A0A087X1N8;P35237;A0A2R8YD12;A0A2R8Y6A7;A0A2R8YDD0;A0A2R8Y517;C9JTJ8	A0A024QZX5;A0A087X1N8;P35237;A0A2R8YD12;A0A2R8Y6A7	Serpin B6	SERPINB6	62165000	77642000	68360000	10755000	6447200	6100400	NaN	NaN	NaN	8	16	16	15	57.4	57.4	55.3	43.024	0	53.89	626790000	23302000	21	39	12	13	14	296800000	173810000	156170000	42.1	44.7	45.5	12	13	13	12	13	13	11	12	12	ADFSGMSQTDLSLSK;ELNMIIMLPDETTDLR;FCADHPFLFFIQHSK;FYQAEMEELDFISAVEK;GNTAAQMAQILSFNK;HINTWVAEK;IAELLSPGSVDPLTR;KTYIGEIFTQILVLPYVGK;LDMMDEEEVEVSLPR;LEESYDMESVLR;LVLVNAVYFR;NEEKPVQMMFK;NLGMTDAFELGK;SCDFLSSFR;SGGGGDIHQGFQSLLTEVNK;TGTQYLLR	tr|A0A024QZX5|A0A024QZX5_HUMAN Isoform of P35237, Serpin B6 OS=Homo sapiens OX=9606 GN=SERPINB6 PE=1 SV=1;tr|A0A087X1N8|A0A087X1N8_HUMAN Isoform of P35237, Serpin B6 OS=Homo sapiens OX=9606 GN=SERPINB6 PE=1 SV=1;sp|P35237|SPB6_HUMAN Serpin B6 OS=Homo sapie	270;3849;4463;5289;6127;6739;7025;8911;9260;9361;11170;11969;12250;13876;14143;15462	NaN;NaN;NaN;NaN;NaN;NaN;NaN;NaN;NaN;NaN;NaN;NaN;NaN;NaN;NaN;NaN
1	A0A024R4E5;Q00341;Q00341-2;H0Y394;C9JZI8;H7C0A4;C9JIZ1;C9J5E5;C9JHS7;C9JHZ8;C9JES8;H7C2D1;H7BZC3;C9JK79;C9JT62;C9JHN6;C9JEJ8;C9JBS3;C9JQ82;C9JMQ6;C9J739;C9JHS9	A0A024R4E5;Q00341;Q00341-2;H0Y394	Vigilin	HDLBP	55533000	63794000	71155000	2647100	1547900	1702500	NaN	NaN	NaN	22	22	22	22	24	24	24	141.44	0	102.5	691000000	5897600	66	51	14	17	20	292010000	196780000	202210000	14.4	19.6	18.5	13	17	17	13	17	17	13	17	17	AACLESAQEPAGAWGNK;ASVITQVFHVPLEER;DKFPEVIINFPDPAQK;DLANIAEVEVSIPAK;DMNQFGEGEQAK;EALEALVPVTIEVEVPFDLHR;GNSLQEILER;ICLEIMQR;IDLPAENSNSETIIITGK;IEGDPQGVQQAK;ITLEGPTEDVNVAQEQIEGMVK;IVGELEQMVSEDVPLDHR;LGQALTEVYAK;LHNSLIGTK;LVGEIMQETGTR;RELLELASR;SFTVDIR;SSVAVLTQESFAEHR;TGAHLELSLAK;VATLNSEEESDPPTYK;VHIEFTEGEDK;VIFPAAEDKDQDLITIIGK	tr|A0A024R4E5|A0A024R4E5_HUMAN Isoform of Q00341, High density lipoprotein binding protein (Vigilin), isoform CRA_a OS=Homo sapiens OX=9606 GN=HDLBP PE=1 SV=1;sp|Q00341|VIGLN_HUMAN Vigilin OS=Homo sapiens OX=9606 GN=HDLBP PE=1 SV=2;sp|Q00341-2|VIGLN_HUMAN	40;1431;2465;2493;2688;3176;6123;7121;7178;7256;8269;8353;9735;9805;11126;13473;14105;14843;15398;16383;16876;16932	NaN;NaN;NaN;NaN;NaN;NaN;NaN;NaN;NaN;NaN;NaN;NaN;NaN;NaN;NaN;NaN;NaN;NaN;NaN;NaN;NaN;NaN
2	A0A024R4M0;P46781;B5MCT8;C9JM19;F2Z3C0;A8MXK4	A0A024R4M0;P46781;B5MCT8;C9JM19	40S ribosomal protein S9	RPS9	140130000	163420000	184470000	79391000	42570000	45513000	NaN	NaN	NaN	6	13	13	13	45.9	45.9	45.9	22.591	0	38.183	1963400000	167470000	11	43	13	15	15	873300000	523000000	567080000	45.9	45.9	45.9	13	13	13	13	13	13	13	13	13	ELLTLDEKDPR;HIDFSLR;IEDFLER;IGVLDEGK;KQVVNIPSFIVR;LDYILGLK;LFEGNALLR;LIGEYGLR;LQTQVFK;QVVNIPSFIVR;RLFEGNALLR;RLQTQVFK;SPYGGGRPGR	tr|A0A024R4M0|A0A024R4M0_HUMAN Isoform of P46781, 40S ribosomal protein S9 OS=Homo sapiens OX=9606 GN=RPS9 PE=1 SV=1;sp|P46781|RS9_HUMAN 40S ribosomal protein S9 OS=Homo sapiens OX=9606 GN=RPS9 PE=1 SV=3;tr|B5MCT8|B5MCT8_HUMAN Isoform of P46781, 40S riboso	3835;6728;7224;7493;8889;9307;9493;9869;10726;13372;13611;13633;14694	NaN;NaN;NaN;NaN;NaN;NaN;NaN;NaN;NaN;NaN;NaN;NaN;NaN
3	A0A024R571;Q9H4M9;C9JC03;C9J2Z4;C9JIJ3;C9IZH1;C9JDQ8	A0A024R571;Q9H4M9;C9JC03;C9J2Z4	EH domain-containing protein 1	EHD1	25191000	34633000	38070000	1385800	1939000	1550700	NaN	NaN	NaN	7	9	9	7	25	25	20.3	61.927	0	35.438	258410000	4875500	29	19	6	5	8	96044000	86737000	75625000	15	11.3	21.9	5	5	8	5	5	8	3	4	7	DKPTYDEIFYTLSPVNGK;EHQISPGDFPSLR;EMPNVFGK;IGPEPTTDSFIAVMHGPTEGVVPGNALVVDPR;KEPELFQTVAEGLR;LFEAEEQDLFK;LLDTVDDMLANDIAR;LLPLEEHYR;VYIGSFWSHPLLIPDNR	tr|A0A024R571|A0A024R571_HUMAN Isoform of Q9H4M9, EH domain-containing protein 1 OS=Homo sapiens OX=9606 GN=EHD1 PE=1 SV=1;sp|Q9H4M9|EHD1_HUMAN EH domain-containing protein 1 OS=Homo sapiens OX=9606 GN=EHD1 PE=1 SV=2;tr|C9JC03|C9JC03_HUMAN Isoform of Q9H4M	2476;3598;3940;7464;8608;9487;10041;10237;17944	NaN;NaN;NaN;NaN;NaN;NaN;NaN;NaN;NaN
4	A0A024R7W5;A0A087X0Q1;A0A087WY31;Q7Z739;Q9Y5A9-2;Q9BYJ9;Q9Y5A9	A0A024R7W5;A0A087X0Q1;A0A087WY31;Q7Z739;Q9Y5A9-2;Q9BYJ9;Q9Y5A9	YTH domain-containing family protein 3;YTH domain-containing family protein 2;YTH domain-containing family protein 1	YTHDF3;YTHDF2;YTHDF1	22340000	NaN	26868000	740120	NaN	594010	NaN	NaN	NaN	7	3	3	3	5.6	5.6	5.6	58.311	0	4.3202	57604000	1334100	18	5	2	0	3	35033000	0	22572000	3.9	0	5.6	2	0	3	2	0	3	2	0	3	DFDWNLK;HTTSIFDDFAHYEK;SYSEDDIHR	tr|A0A024R7W5|A0A024R7W5_HUMAN Isoform of Q7Z739, YTH domain family, member 3, isoform CRA_a OS=Homo sapiens OX=9606 GN=YTHDF3 PE=1 SV=1;tr|A0A087X0Q1|A0A087X0Q1_HUMAN Isoform of Q7Z739, YTH domain-containing family protein 3 OS=Homo sapiens OX=9606 GN=YTH	2163;6940;15066	NaN;NaN;NaN
5	A0A024RA52;P25787;H3BT36;C9JCK5;H7C402	A0A024RA52;P25787	Proteasome subunit alpha type;Proteasome subunit alpha type-2	PSMA2	139790000	63673000	67746000	10072000	3371600	3377100	NaN	NaN	NaN	5	5	5	5	26.5	26.5	26.5	25.898	0	21.88	456660000	16821000	13	26	11	7	8	302550000	77844000	76265000	26.5	23.5	23.5	5	4	4	5	4	4	5	4	4	GYSFSLTTFSPSGK;LVQIEYALAAVAGGAPSVGIK;RYNEDLELEDAIHTAILTLK;SILYDER;YNEDLELEDAIHTAILTLK	tr|A0A024RA52|A0A024RA52_HUMAN Isoform of P25787, Proteasome subunit alpha type OS=Homo sapiens OX=9606 GN=PSMA2 PE=1 SV=1;sp|P25787|PSA2_HUMAN Proteasome subunit alpha type-2 OS=Homo sapiens OX=9606 GN=PSMA2 PE=1 SV=2	6543;11204;13783;14286;18498	NaN;NaN;NaN;NaN;NaN
6	A0A024RBT2;Q9NR28-2;Q9NR28-3;Q9NR28;H7BZQ7;H7BZK7;A0A2U3TZH2	A0A024RBT2;Q9NR28-2;Q9NR28-3;Q9NR28;H7BZQ7;H7BZK7;A0A2U3TZH2	Diablo homolog, mitochondrial	DIABLO	NaN	NaN	NaN	NaN	NaN	716750	NaN	NaN	NaN	7	2	2	2	14.5	14.5	14.5	18.919	0	6.1508	6450800	716750	9	2	0	0	2	0	0	6450800	0	0	14.5	0	0	2	0	0	2	0	0	2	MNSEEEDEVWQVIIGAR;NHIQLVK	tr|A0A024RBT2|A0A024RBT2_HUMAN Isoform of Q9NR28, Diablo homolog, mitochondrial OS=Homo sapiens OX=9606 GN=DIABLO PE=1 SV=1;sp|Q9NR28-2|DBLOH_HUMAN Isoform of Q9NR28, Isoform 2 of Diablo homolog, mitochondrial OS=Homo sapiens OX=9606 GN=DIABLO;sp|Q9NR28-3|	11689;12107	NaN;NaN
7	A0A0G2JL47;A0A024RCR6;A0A0G2JK23;P46379-4;P46379-5;P46379-2;P46379;P46379-3;F6S6P2;X6REW1;A0A0G2JJM1	A0A0G2JL47;A0A024RCR6;A0A0G2JK23;P46379-4;P46379-5;P46379-2;P46379;P46379-3;F6S6P2;X6REW1;A0A0G2JJM1	Large proline-rich protein BAG6	BAT3;BAG6	NaN	NaN	NaN	1091700	219430	227770	NaN	NaN	NaN	11	3	3	3	4.7	4.7	4.7	113.46	0	9.4073	45660000	1538900	29	5	3	1	1	32691000	6363600	6605200	4.7	1.2	1.2	3	1	1	3	1	1	3	1	1	LINLVGESLR;LLGNTFVALSDLR;TNLEFLQEQFNSIAAHVLHCTDSGFGAR	tr|A0A0G2JL47|A0A0G2JL47_HUMAN Isoform of P46379, Large proline-rich protein BAG6 OS=Homo sapiens OX=9606 GN=BAG6 PE=1 SV=1;tr|A0A024RCR6|A0A024RCR6_HUMAN Isoform of P46379, HLA-B associated transcript 3, isoform CRA_a OS=Homo sapiens OX=9606 GN=BAG6 PE=1	9897;10131;15827	NaN;NaN;NaN
8	A0A075B6F6;Q8TCT9-5;Q8TCT9;Q8TCT9-4;Q8TCT9-2;A0A0C4DGU3	A0A075B6F6;Q8TCT9-5;Q8TCT9;Q8TCT9-4;Q8TCT9-2;A0A0C4DGU3	Minor histocompatibility antigen H13	HM13	NaN	NaN	NaN	2238800	1484700	1834200	NaN	NaN	NaN	6	2	2	2	8.1	8.1	8.1	30.162	0	5.3852	72249000	5557600	13	2	1	0	1	29104000	19301000	23844000	3.7	3.7	8.1	1	1	2	1	1	2	1	1	2	LVFPQDLLEK;NASDMPETITSR	tr|A0A075B6F6|A0A075B6F6_HUMAN Isoform of Q8TCT9, Minor histocompatibility antigen H13 (Fragment) OS=Homo sapiens OX=9606 GN=HM13 PE=1 SV=1;sp|Q8TCT9-5|HM13_HUMAN Isoform of Q8TCT9, Isoform 5 of Minor histocompatibility antigen H13 OS=Homo sapiens OX=9606	11119;11889	NaN;NaN
9	A0A075B797;M0R3B2;A0A075B6F9;Q9Y314;M0QX85;M0R1K2	A0A075B797;M0R3B2;A0A075B6F9;Q9Y314;M0QX85;M0R1K2	Nitric oxide synthase-interacting protein	NOSIP	NaN	NaN	NaN	659860	159860	289430	NaN	NaN	NaN	6	2	2	2	11.2	11.2	11.2	25.62	0.00042319	3.0372	11091000	159860	10	3	1	1	1	6598600	1598600	2894300	4.7	6.5	4.7	1	1	1	1	1	1	1	1	1	EAILEYILHQK;VLPSFWIPSLTPEAK	tr|A0A075B797|A0A075B797_HUMAN Isoform of Q9Y314, Nitric oxide synthase-interacting protein (Fragment) OS=Homo sapiens OX=9606 GN=NOSIP PE=1 SV=1;tr|M0R3B2|M0R3B2_HUMAN Isoform of Q9Y314, Nitric oxide synthase-interacting protein (Fragment) OS=Homo sapiens	3164;17199	NaN;NaN
10	A0A075B730;P58107	A0A075B730;P58107	Epiplakin	EPPK1	NaN	NaN	NaN	25863	77046	52271	NaN	NaN	NaN	2	7	1	1	6.9	0.4	0.4	553.12	0	33.861	106970000	25863	272	4	2	1	1	71793000	20957000	14218000	4.5	5.7	5.6	5	5	5	1	1	1	1	1	1	GFFDPNTHENLTYLQLLQR;GYFDEEMNR;LLEAQIATGGIIDPVHSHR;LLEAQIATGGVIDPVHSHR;VLADPSDDTK;VPVDVAYQR;VPVDVAYR	tr|A0A075B730|A0A075B730_HUMAN Isoform of P58107, Epiplakin OS=Homo sapiens OX=9606 GN=EPPK1 PE=1 SV=2;sp|P58107|EPIPL_HUMAN Epiplakin OS=Homo sapiens OX=9606 GN=EPPK1 PE=1 SV=3	5588;6508;10051;10052;17026;17473;17474	NaN;NaN;NaN;NaN;NaN;NaN;NaN
11	A0A075B7C8;A0A075B743;A0A286YEY3;A0A075B7B5;G5EA48;B7ZM87;P0DMP2;P0DJJ0;Q7Z6B7-2;O75044;Q7Z6B7	A0A075B7C8;A0A075B743;A0A286YEY3;A0A075B7B5;G5EA48;B7ZM87;P0DMP2;P0DJJ0;Q7Z6B7-2;O75044;Q7Z6B7	SLIT-ROBO Rho GTPase-activating protein 2B;SLIT-ROBO Rho GTPase-activating protein 2C;SLIT-ROBO Rho GTPase-activating protein 1;SLIT-ROBO Rho GTPase-activating protein 2	SRGAP2;SRGAP1;SRGAP2B;SRGAP2C	NaN	NaN	NaN	NaN	133700	103170	NaN	NaN	NaN	11	1	1	1	14	14	14	10.35	0.0011924	2.5873	1184300	236870	5	2	0	1	1	0	668510	515830	0	14	14	0	1	1	0	1	1	0	1	1	VQLLQDLQDFFR	tr|A0A075B7C8|A0A075B7C8_HUMAN Isoform of O75044, SLIT-ROBO Rho GTPase-activating protein 2 (Fragment) OS=Homo sapiens OX=9606 GN=SRGAP2 PE=4 SV=1;tr|A0A075B743|A0A075B743_HUMAN Isoform of O75044, SLIT-ROBO Rho GTPase-activating protein 2 (Fragment) OS=Hom	17517	NaN
12	A0A075B7D9;Q92804-2;Q92804;A0A075B7E4;A0A075B7F4;A0A075B7F2	A0A075B7D9;Q92804-2;Q92804	TATA-binding protein-associated factor 2N	TAF15	36719000	36377000	35293000	4189900	1122900	1560800	NaN	NaN	NaN	6	7	5	5	21.2	18	18	48.839	0	39.452	211580000	6873600	15	14	7	3	4	128220000	39501000	43856000	21.2	6.9	10.9	7	4	5	5	2	3	5	2	3	AAIDWFDGK;AAIDWFDGKEFHGNIIK;EFHGNIIK;ENYSHHTQDDRR;GEATVSFDDPPSAK;SGDWVCPNPSCGNMNFAR;TDADSESDNSDNNTIFVQGLGEGVSTDQVGEFFK	tr|A0A075B7D9|A0A075B7D9_HUMAN Isoform of Q92804, TATA-binding protein-associated factor 2N OS=Homo sapiens OX=9606 GN=TAF15 PE=1 SV=1;sp|Q92804-2|RBP56_HUMAN Isoform of Q92804, Isoform Short of TATA-binding protein-associated factor 2N OS=Homo sapiens OX=	88;89;3428;3992;5489;14130;15197	NaN;NaN;NaN;NaN;NaN;NaN;NaN
13	E9PKG6;A0A087WSV8;P80303-2;P80303;H0YD18;H0YEG8;Q2L696	E9PKG6;A0A087WSV8;P80303-2;P80303;H0YD18;H0YEG8;Q2L696	Nucleobindin-2;Nesfatin-1	NUCB2;Nucb2	NaN	NaN	NaN	1010100	613610	563010	NaN	NaN	NaN	7	2	2	2	8.9	8.9	8.9	40.368	0	6.2102	47146000	2186700	17	4	2	1	1	27143000	10431000	9571100	8.9	2.7	2.7	2	1	1	2	1	1	2	1	1	LHDVNSDGFLDEQELEALFTK;LVTLEEFLK	tr|E9PKG6|E9PKG6_HUMAN Isoform of P80303, Nucleobindin-2 OS=Homo sapiens OX=9606 GN=NUCB2 PE=1 SV=2;tr|A0A087WSV8|A0A087WSV8_HUMAN Isoform of P80303, Nucleobindin 2, isoform CRA_b OS=Homo sapiens OX=9606 GN=NUCB2 PE=1 SV=1;sp|P80303-2|NUCB2_HUMAN Isoform o	9786;11246	NaN;NaN
14	Q16881;Q16881-3;Q16881-4;A0A087WSY9;A0A087WSW9;Q16881-6;Q16881-2;Q16881-5;A0A182DWI3;F8W809;E9PIR7;Q16881-7;E2QRB9;E9PKD3;A0A0B4J225;E9PIZ5;E9PKI4;E9PLT3;E9PQI3;A0A096LPK7;E9PJU2;E9PRI8	Q16881;Q16881-3;Q16881-4;A0A087WSY9;A0A087WSW9;Q16881-6;Q16881-2;Q16881-5;A0A182DWI3;F8W809;E9PIR7;Q16881-7;E2QRB9	Thioredoxin reductase 1, cytoplasmic	TXNRD1	243580000	185620000	191870000	23552000	12111000	12258000	NaN	NaN	NaN	22	26	26	25	53.5	53.5	51.2	70.905	0	223.44	2940100000	47921000	32	99	34	31	34	1580700000	711950000	647430000	50.7	49.8	49.8	23	23	23	23	23	23	22	22	22	ALEGTLSELAAETDLPVVFVK;CDYENVPTTVFTPLEYGACGLSEEK;EYCISSDDLFSLPYCPGK;FLIATGERPR;GFDQDMANK;IGEHMEEHGIK;IGLETVGVK;IPVTDEEQTNVPYIYAIGDILEDK;IPVTDEEQTNVPYIYAIGDILEDKVELTPVAIQAGR;KLMHQAALLGQALQDSR;KQLDSTIGIHPVCAEVFTTLSVTK;KVVYENAYGQFIGPHR;LMHQAALLGQALQDSR;LYAGSTVK;MIEAVQNHIGSLNWGYR;MNGPEDLPK;QLDSTIGIHPVCAEVFTTLSVTK;SYDYDLIIIGGGSGGLAAAK;VELTPVAIQAGR;VEQIEAGTPGR;VMVLDFVTPTPLGTR;VVAQSTNSEEIIEGEYNTVMLAIGR;V…	sp|Q16881|TRXR1_HUMAN Thioredoxin reductase 1, cytoplasmic OS=Homo sapiens OX=9606 GN=TXNRD1 PE=1 SV=3;sp|Q16881-3|TRXR1_HUMAN Isoform of Q16881, Isoform 3 of Thioredoxin reductase 1, cytoplasmic OS=Homo sapiens OX=9606 GN=TXNRD1;sp|Q16881-4|TRXR1_HUMAN Is	885;1784;4353;4846;5580;7418;7450;8016;8017;8770;8874;8938;10359;11294;11566;11677;13097;15043;16622;16643;17327;17786;17821;17909;18012;18429	NaN;NaN;NaN;NaN;NaN;NaN;NaN;NaN;NaN;NaN;NaN;NaN;NaN;NaN;NaN;NaN;NaN;NaN;NaN;NaN;NaN;NaN;NaN;NaN;NaN;NaN
15	V9GYI0;V9GYH6;A0A087WT04;U3KQ54;Q6P1K2-3;Q6P1K2-6;Q6P1K2;Q6P1K2-2;Q6P1K2-5	V9GYI0;V9GYH6;A0A087WT04;U3KQ54;Q6P1K2-3;Q6P1K2-6;Q6P1K2;Q6P1K2-2;Q6P1K2-5	Polyamine-modulated factor 1	PMF1;PMF1-BGLAP	NaN	NaN	NaN	1050900	NaN	502330	NaN	NaN	NaN	9	1	1	1	13.8	13.8	13.8	9.2963	0.003701	2.1447	7766300	1553300	5	2	1	0	1	5254700	0	2511600	13.8	0	13.8	1	0	1	1	0	1	1	0	1	LLDTMVDTFLQK	tr|V9GYI0|V9GYI0_HUMAN Isoform of Q6P1K2, Polyamine-modulated factor 1 OS=Homo sapiens OX=9606 GN=PMF1 PE=4 SV=1;tr|V9GYH6|V9GYH6_HUMAN Isoform of Q6P1K2, Polyamine-modulated factor 1 (Fragment) OS=Homo sapiens OX=9606 GN=PMF1 PE=4 SV=1;tr|A0A087WT04|A0A08	10040	NaN
16	A0A087WT20;Q9NV06;E5RHM4;A0A087X1F8;B3KME9;Q9NV06-2	A0A087WT20;Q9NV06;E5RHM4;A0A087X1F8;B3KME9;Q9NV06-2	DDB1- and CUL4-associated factor 13	DCAF13	NaN	4196900	3328200	NaN	38913	73488	NaN	NaN	NaN	6	2	2	2	4.4	4.4	4.4	67.55	0.00044248	3.3984	7214900	112400	36	4	0	2	2	0	3329600	3885400	0	2.7	4.4	0	1	2	0	1	2	0	1	2	FNPIETFLLGSCASDR;PFLASLDGHR	tr|A0A087WT20|A0A087WT20_HUMAN Isoform of Q9NV06, DDB1- and CUL4-associated factor 13 OS=Homo sapiens OX=9606 GN=DCAF13 PE=1 SV=1;sp|Q9NV06|DCA13_HUMAN DDB1- and CUL4-associated factor 13 OS=Homo sapiens OX=9606 GN=DCAF13 PE=1 SV=2;tr|E5RHM4|E5RHM4_HUMAN I	4961;12723	NaN;NaN
17	A0A087WXZ1;A0A087WT22;E7ESS1;A0A087X1Q1;J3KP33;A0A087WZU8;A0A0U1RQC9;P04637-8;P04637-9;P04637-7;P04637-5;P04637-6;P04637-2;P04637-3;P04637-4;P04637	A0A087WXZ1;A0A087WT22;E7ESS1;A0A087X1Q1;J3KP33;A0A087WZU8;A0A0U1RQC9;P04637-8;P04637-9;P04637-7;P04637-5;P04637-6;P04637-2;P04637-3;P04637-4;P04637	Cellular tumor antigen p53	TP53	NaN	NaN	NaN	797250	NaN	NaN	NaN	NaN	NaN	16	1	1	1	10.4	10.4	10.4	20.741	0.001231	2.811	7175200	797250	9	1	1	0	0	7175200	0	0	10.4	0	0	1	0	0	1	0	0	1	0	0	RPILTIITLEDSSGNLLGR	tr|A0A087WXZ1|A0A087WXZ1_HUMAN Isoform of P04637, Cellular tumor antigen p53 OS=Homo sapiens OX=9606 GN=TP53 PE=1 SV=1;tr|A0A087WT22|A0A087WT22_HUMAN Isoform of P04637, Cellular tumor antigen p53 OS=Homo sapiens OX=9606 GN=TP53 PE=1 SV=1;tr|E7ESS1|E7ESS1_H	13674	NaN
18	A0A087WT27;J3KN95;O95394;O95394-3;O95394-4;H0Y8I3;D6RCQ8;D6RF77;D6RIS6;H0Y987	A0A087WT27;J3KN95;O95394;O95394-3;O95394-4;H0Y8I3;D6RCQ8;D6RF77;D6RIS6;H0Y987	Phosphoacetylglucosamine mutase	PGM3	NaN	7117800	6939100	147980	209890	198990	NaN	NaN	NaN	10	2	2	2	7.3	7.3	7.3	49.094	0	8.5175	13364000	556850	24	5	1	2	2	3551400	5037300	4775800	3.9	7.3	7.3	1	2	2	1	2	2	1	2	2	EAVNLQQDAFVVIGR;QAVTPPGLQEAINDLVK	tr|A0A087WT27|A0A087WT27_HUMAN Isoform of O95394, Phosphoacetylglucosamine mutase OS=Homo sapiens OX=9606 GN=PGM3 PE=1 SV=1;tr|J3KN95|J3KN95_HUMAN Isoform of O95394, Phosphoacetylglucosamine mutase OS=Homo sapiens OX=9606 GN=PGM3 PE=1 SV=1;sp|O95394|AGM1_H	3240;12872	NaN;NaN
19	A0A087WT34;A0A087X1H1;A0A0A0MTS6;K7EIE8;O95983-2;O95983	A0A087WT34;A0A087X1H1;A0A0A0MTS6;K7EIE8;O95983-2;O95983	Methyl-CpG-binding domain protein 3	MBD3	NaN	NaN	NaN	1215900	274950	NaN	NaN	NaN	NaN	6	1	1	1	11.5	11.5	11.5	14.46	0.0099326	1.7695	10436000	1490800	7	2	1	1	0	8511000	1924600	0	11.5	11.5	0	1	1	0	1	1	0	1	1	0	LSGLNAFDIAEELVK	tr|A0A087WT34|A0A087WT34_HUMAN Isoform of O95983, Methyl-CpG-binding domain protein 3 (Fragment) OS=Homo sapiens OX=9606 GN=MBD3 PE=1 SV=1;tr|A0A087X1H1|A0A087X1H1_HUMAN Isoform of O95983, Methyl-CpG-binding domain protein 3 (Fragment) OS=Homo sapiens OX=9	10831	NaN
20	A0A087WT64;Q07820	A0A087WT64;Q07820	Induced myeloid leukemia cell differentiation protein Mcl-1	MCL1	NaN	NaN	NaN	465770	122810	141590	NaN	NaN	NaN	2	1	1	1	10.7	10.7	10.7	21.226	0.0012072	2.659	6571600	730170	9	3	1	1	1	4191900	1105300	1274300	10.7	10.7	10.7	1	1	1	1	1	1	1	1	1	TINQESCIEPLAESITDVLVR	tr|A0A087WT64|A0A087WT64_HUMAN Isoform of Q07820, Induced myeloid leukemia cell differentiation protein Mcl-1 OS=Homo sapiens OX=9606 GN=MCL1 PE=1 SV=1;sp|Q07820|MCL1_HUMAN Induced myeloid leukemia cell differentiation protein Mcl-1 OS=Homo sapiens OX=9606	15575	NaN
21	A0A087X0W7;A0A087WT95;Q86TX2;P49753;G3V4F2;P49753-2	A0A087X0W7;A0A087WT95;Q86TX2;P49753;G3V4F2;P49753-2	Acyl-coenzyme A thioesterase 1;Acyl-coenzyme A thioesterase 2, mitochondrial	ACOT2;ACOT1	NaN	27699000	22213000	NaN	268650	195450	NaN	NaN	NaN	6	4	4	4	16.2	16.2	16.2	46.292	0	6.4236	52424000	464100	25	5	0	3	2	0	30060000	22364000	0	16.2	11.4	0	4	3	0	4	3	0	4	3	ASLHALVGSPIIWGGEPR;DGYADIVDVLNSPLEGPDQK;GPGVGLLGISK;TPLAVELEVLDGHDPDPGR	tr|A0A087X0W7|A0A087X0W7_HUMAN Isoform of P49753, Acyl-coenzyme A thioesterase 2, mitochondrial OS=Homo sapiens OX=9606 GN=ACOT2 PE=1 SV=1;tr|A0A087WT95|A0A087WT95_HUMAN Isoform of P49753, Acyl-coenzyme A thioesterase 2, mitochondrial OS=Homo sapiens OX=96	1404;2326;6165;15874	NaN;NaN;NaN;NaN
22	E9PQS1;A0A087WT99;A0A1W2PRB8;Q9H0W9-3;Q9H0W9-2;Q9H0W9;E9PR95;E9PSC3;E9PLC5;E9PLB3;E9PIP1;E9PPB5;E9PJU8;Q9H0W9-4	E9PQS1;A0A087WT99;A0A1W2PRB8;Q9H0W9-3;Q9H0W9-2;Q9H0W9;E9PR95;E9PSC3;E9PLC5;E9PLB3;E9PIP1;E9PPB5;E9PJU8;Q9H0W9-4	Ester hydrolase C11orf54	C11orf54	12798000	13642000	NaN	1842500	924450	223330	NaN	NaN	NaN	14	2	2	2	12.1	12.1	12.1	26.333	0	6.7594	29903000	2990300	10	5	2	2	1	18425000	9244500	2233300	12.1	12.1	7.1	2	2	1	2	2	1	2	2	1	APLVCLPVFVSR;IAEVGGVPYLLPLVNQK	tr|E9PQS1|E9PQS1_HUMAN Isoform of Q9H0W9, Ester hydrolase C11orf54 (Fragment) OS=Homo sapiens OX=9606 GN=C11orf54 PE=1 SV=1;tr|A0A087WT99|A0A087WT99_HUMAN Isoform of Q9H0W9, Ester hydrolase C11orf54 OS=Homo sapiens OX=9606 GN=C11orf54 PE=1 SV=1;tr|A0A1W2PR	1215;7034	NaN;NaN
23	A0A087WTA8;P08123	A0A087WTA8;P08123	Collagen alpha-2(I) chain	COL1A2	NaN	NaN	NaN	54896	66059	63927	NaN	NaN	NaN	2	1	1	1	1	1	1	129.15	0.0004686	3.9112	12757000	184880	69	3	1	1	1	3787800	4558000	4410900	1	1	1	1	1	1	1	1	1	1	1	1	GPAGPSGPAGKDGR	tr|A0A087WTA8|A0A087WTA8_HUMAN Isoform of P08123, Collagen alpha-2(I) chain OS=Homo sapiens OX=9606 GN=COL1A2 PE=1 SV=1;sp|P08123|CO1A2_HUMAN Collagen alpha-2(I) chain OS=Homo sapiens OX=9606 GN=COL1A2 PE=1 SV=7	6137	NaN
24	A0A087WTB8;Q5TBK7;P15374	A0A087WTB8;Q5TBK7;P15374	Ubiquitin carboxyl-terminal hydrolase;Ubiquitin carboxyl-terminal hydrolase isozyme L3	UCHL3	NaN	NaN	NaN	1150300	NaN	489450	NaN	NaN	NaN	3	2	2	2	14.9	14.9	14.9	21.945	0.00042772	3.1161	18038000	489450	11	2	1	0	1	12654000	0	5384000	10.3	0	4.6	1	0	1	1	0	1	1	0	1	QTISNACGTIGLIHAIANNK;YLENYDAIR	tr|A0A087WTB8|A0A087WTB8_HUMAN Isoform of P15374, Ubiquitin carboxyl-terminal hydrolase OS=Homo sapiens OX=9606 GN=UCHL3 PE=1 SV=1;tr|Q5TBK7|Q5TBK7_HUMAN Isoform of P15374, Ubiquitin carboxyl-terminal hydrolase isozyme L3 (Fragment) OS=Homo sapiens OX=9606	13303;18423	NaN;NaN
25	F5H5N1;A0A087WXF6;A0A087WTI3;F5GXJ1;O75251-2;O75251	F5H5N1;A0A087WXF6;A0A087WTI3;F5GXJ1;O75251-2;O75251	NADH dehydrogenase [ubiquinone] iron-sulfur protein 7, mitochondrial	NDUFS7	NaN	NaN	NaN	NaN	NaN	420940	NaN	NaN	NaN	6	1	1	1	4.9	4.9	4.9	19.77	0.0065288	1.9475	4209400	420940	10	1	0	0	1	0	0	4209400	0	0	4.9	0	0	1	0	0	1	0	0	1	LDDLVNWAR	tr|F5H5N1|F5H5N1_HUMAN Isoform of O75251, NADH dehydrogenase [ubiquinone] iron-sulfur protein 7, mitochondrial OS=Homo sapiens OX=9606 GN=NDUFS7 PE=1 SV=1;tr|A0A087WXF6|A0A087WXF6_HUMAN Isoform of O75251, NADH dehydrogenase [ubiquinone] iron-sulfur protein	9198	NaN
26	F8W1I4;Q8TBL5;A0A087WTL9;F8VY40;Q96J85;Q71RC2-7;Q71RC2-6;Q71RC2-5;Q71RC2-3;Q71RC2;Q71RC2-4	F8W1I4;Q8TBL5;A0A087WTL9;F8VY40;Q96J85;Q71RC2-7;Q71RC2-6;Q71RC2-5;Q71RC2-3;Q71RC2;Q71RC2-4	La-related protein 4	LARP4	7731500	NaN	10645000	1758800	750990	827990	NaN	NaN	NaN	11	2	2	2	11.2	11.2	11.2	14.143	0	5.1206	19492000	3337800	5	5	2	1	2	10394000	3754900	5342700	11.2	10.4	11.2	2	1	2	2	1	2	2	1	2	KLTTDPDLILEVLR;LTTDPDLILEVLR	tr|F8W1I4|F8W1I4_HUMAN Isoform of Q71RC2, La-related protein 4 (Fragment) OS=Homo sapiens OX=9606 GN=LARP4 PE=1 SV=1;tr|Q8TBL5|Q8TBL5_HUMAN Isoform of Q71RC2, LARP4 protein OS=Homo sapiens OX=9606 GN=LARP4 PE=1 SV=1;tr|A0A087WTL9|A0A087WTL9_HUMAN Isoform o	8792;11054	NaN;NaN
27	A0A087WTP3;Q92945;M0R0I5;M0QYH3;M0QXW7;M0QYG1;M0R0C6;M0R3J3;M0R251;M0R263	A0A087WTP3;Q92945;M0R0I5	Far upstream element-binding protein 2	KHSRP	97635000	102090000	105540000	13833000	8359100	8773400	NaN	NaN	NaN	10	19	19	18	37.3	37.3	35.3	73.027	0	98.082	1347100000	30966000	34	48	15	16	17	621160000	346380000	379610000	27.6	27.4	34.7	14	14	18	14	14	18	13	13	17	AINQQTGAFVEISR;AWEEYYK;DAFADAVQR;GGGGPGGGGPGGGSAGGPSQPPGGGGPGIR;HSVGVVIGR;IAHIMGPPDR;IGGDAATTVNNSTPDFGFGGQK;IGGGIDVPVPR;IGQQPQQPGAPPQQDYTK;IINDLLQSLR;LASQGDSISSQLGPIHPPPR;MILIQDGSQNTNVDKPLR;MMLDDIVSR;RQLEDGDQPESK;SVSLTGAPESVQK;TSMTEEYRVPDGMVGLIIGR;VPDGMVGLIIGR;VQISPDSGGLPER;VQQACEMVMDILR	tr|A0A087WTP3|A0A087WTP3_HUMAN Isoform of Q92945, Far upstream element-binding protein 2 OS=Homo sapiens OX=9606 GN=KHSRP PE=1 SV=1;sp|Q92945|FUBP2_HUMAN Far upstream element-binding protein 2 OS=Homo sapiens OX=9606 GN=KHSRP PE=1 SV=4;tr|M0R0I5|M0R0I5_HUM	765;1696;1982;5690;6916;7044;7427;7429;7473;7609;9113;11572;11665;13709;15000;15996;17410;17513;17527	NaN;NaN;NaN;NaN;NaN;NaN;NaN;NaN;NaN;NaN;NaN;NaN;NaN;NaN;NaN;NaN;NaN;NaN;NaN
28	P11940;P11940-2;A0A087WTT1;E7EQV3;E7ERJ7;H0YAR2;Q9H361;H0YBN4;H0YAP2;H0YB86;Q4VXU2;E5RGH3;E5RJB9;H0YAS6;H0YB75;E5RH24;H0YAS7;Q4VXU2-2;E5RHG7;H0YC10;H0YER0;E5RFD8;E5RGC4;Q5JQF8;Q96DU9-2;Q96DU9	P11940;P11940-2;A0A087WTT1;E7EQV3;E7ERJ7;H0YAR2;Q9H361	Polyadenylate-binding protein 1;Polyadenylate-binding protein;Polyadenylate-binding protein 3	PABPC1;PABPC3	236870000	235700000	274460000	33921000	21029000	23071000	NaN	NaN	NaN	26	24	24	16	40.1	40.1	24.4	70.67	0	150.62	3778700000	78021000	36	87	31	28	28	1790700000	950890000	1037100000	34.3	33.2	36.3	21	21	22	21	21	22	14	15	16	ALDTMNFDVIK;ALYDTFSAFGNILSCK;AVNSATGVPTV;EFSPFGTITSAK;EFTNVYIK;FSPAGPILSIR;GFGFVCFSSPEEATK;GFGFVSFER;GYGFVHFETQEAAER;ITGMLLEIDNSELLHMLESPESLR;IVATKPLYVALAQR;KEFSPFGTITSAK;LFPLIQAMHPTLAGK;MNGMLLNDR;NFGEDMDDER;NFGEDMDDERLK;NLDDGIDDER;NLDDGIDDERLR;PLYVALAQR;QAHLTNQYMQR;SGVGNIFIK;SLGYAYVNFQQPADAER;VDEAVAVLQAHQAK;YQGVNLYVK	sp|P11940|PABP1_HUMAN Polyadenylate-binding protein 1 OS=Homo sapiens OX=9606 GN=PABPC1 PE=1 SV=2;sp|P11940-2|PABP1_HUMAN Isoform of P11940, Isoform 2 of Polyadenylate-binding protein 1 OS=Homo sapiens OX=9606 GN=PABPC1;tr|A0A087WTT1|A0A087WTT1_HUMAN Isofo	869;1096;1639;3458;3466;5113;5601;5605;6516;8254;8327;8580;9547;11676;12026;12027;12216;12217;12771;12838;14193;14443;16455;18548	NaN;NaN;NaN;NaN;NaN;NaN;NaN;NaN;NaN;NaN;NaN;NaN;NaN;NaN;NaN;NaN;NaN;NaN;NaN;NaN;NaN;NaN;NaN;NaN
29	A0A087WTV6;Q96C36;J3KR12;A0A087WZR9	A0A087WTV6;Q96C36;J3KR12;A0A087WZR9	Pyrroline-5-carboxylate reductase 2;Pyrroline-5-carboxylate reductase	PYCR2	20935000	22649000	22219000	2147700	1517200	1154600	NaN	NaN	NaN	4	7	6	6	45.9	40.7	40.7	25.868	0	25.995	164550000	4819500	16	18	5	7	6	72156000	50839000	41553000	41.1	45.9	39.4	6	7	6	5	6	5	5	6	5	DNVCSPGGATIHALHFLESGGFR;GFTAAGILSAHK;IIASSPEMNLPTVSALR;LESPTVSTLTPSSPGK;RLAIQLGAQALLGAAK;SLLINAVEASCIR;SVGFIGAGQLAYALAR	tr|A0A087WTV6|A0A087WTV6_HUMAN Isoform of Q96C36, Pyrroline-5-carboxylate reductase 2 OS=Homo sapiens OX=9606 GN=PYCR2 PE=1 SV=1;sp|Q96C36|P5CR2_HUMAN Pyrroline-5-carboxylate reductase 2 OS=Homo sapiens OX=9606 GN=PYCR2 PE=1 SV=1;tr|J3KR12|J3KR12_HUMAN Unc	2740;5648;7548;9450;13584;14478;14952	NaN;NaN;NaN;NaN;NaN;NaN;NaN
30	A0A087WVR3;A0A087WTW0;Q96T88;Q96T88-2;A0A087WWG9	A0A087WVR3;A0A087WTW0;Q96T88;Q96T88-2;A0A087WWG9	E3 ubiquitin-protein ligase UHRF1	UHRF1	NaN	NaN	NaN	224720	NaN	57982	NaN	NaN	NaN	5	2	2	2	2	2	2	91.099	0.00083438	2.9155	11591000	282710	41	3	2	0	1	9213700	0	2377300	2	0	0.9	2	0	1	2	0	1	2	0	1	IIFVDEVFK;SGFLVWR	tr|A0A087WVR3|A0A087WVR3_HUMAN Isoform of Q96T88, E3 ubiquitin-protein ligase UHRF1 OS=Homo sapiens OX=9606 GN=UHRF1 PE=1 SV=1;tr|A0A087WTW0|A0A087WTW0_HUMAN Isoform of Q96T88, E3 ubiquitin-protein ligase UHRF1 OS=Homo sapiens OX=9606 GN=UHRF1 PE=1 SV=1;sp	7578;14140	NaN;NaN
31	A0A087WTZ5;E9PJ81;E9PRQ7;Q04323;Q04323-2	A0A087WTZ5;E9PJ81;E9PRQ7;Q04323;Q04323-2	UBX domain-containing protein 1	UBXN1	NaN	21347000	17458000	1396600	1573200	1200500	NaN	NaN	NaN	5	3	3	3	17.6	17.6	17.6	27.015	0	9.5516	59324000	4170300	12	8	3	3	2	16759000	28159000	14406000	14.7	10.9	10.9	2	2	2	2	2	2	2	2	2	AELTALESLIEMGFPR;GEELGGGQDPVQLLSGFPR;LYVELHR	tr|A0A087WTZ5|A0A087WTZ5_HUMAN Isoform of Q04323, UBX domain-containing protein 1 OS=Homo sapiens OX=9606 GN=UBXN1 PE=1 SV=1;tr|E9PJ81|E9PJ81_HUMAN Isoform of Q04323, UBX domain-containing protein 1 (Fragment) OS=Homo sapiens OX=9606 GN=UBXN1 PE=1 SV=1;tr|	414;5496;11363	NaN;NaN;NaN
32	A0A087WU65;A0A2R8YE10;Q9NRW7;B7Z7G7;A0A2R8YD95;A0A2R8YF01;A0A1B0GXI6;Q9NRW7-2	A0A087WU65;A0A2R8YE10;Q9NRW7;B7Z7G7;A0A2R8YD95	Vacuolar protein sorting-associated protein 45	VPS45	12131000	16541000	11513000	331030	197980	141360	NaN	NaN	NaN	8	3	3	3	8.7	8.7	8.7	50.736	0	7.5611	42851000	670370	27	11	3	4	4	21069000	12991000	8790700	8.7	8.7	8.7	3	3	3	3	3	3	3	3	3	SFLEEVLASGLHSR;TEVPPLLLILDR;TTQGLTALLLSLK	tr|A0A087WU65|A0A087WU65_HUMAN Isoform of Q9NRW7, Vacuolar protein sorting-associated protein 45 OS=Homo sapiens OX=9606 GN=VPS45 PE=1 SV=1;tr|A0A2R8YE10|A0A2R8YE10_HUMAN Isoform of Q9NRW7, Vacuolar protein sorting-associated protein 45 OS=Homo sapiens OX=	14085;15315;16069	NaN;NaN;NaN
33	A0A087WUB9;Q8WYA6;Q8WYA6-3;Q8WYA6-2;Q8WYA6-4	A0A087WUB9;Q8WYA6;Q8WYA6-3;Q8WYA6-2;Q8WYA6-4	Beta-catenin-like protein 1	CTNNBL1	17804000	26977000	25214000	1100800	1114600	563520	NaN	NaN	NaN	5	5	5	5	8.6	8.6	8.6	65.702	0	13.7	72252000	2778900	26	9	2	5	2	28620000	28980000	14652000	2.8	8.6	5.8	2	5	3	2	5	3	2	5	3	FVDILGLR;GEGLQLMNLMLR;ILGLLENF;MDVGELLSYQPNR;TIFPLFMK	tr|A0A087WUB9|A0A087WUB9_HUMAN Isoform of Q8WYA6, Beta-catenin-like protein 1 OS=Homo sapiens OX=9606 GN=CTNNBL1 PE=1 SV=1;sp|Q8WYA6|CTBL1_HUMAN Beta-catenin-like protein 1 OS=Homo sapiens OX=9606 GN=CTNNBL1 PE=1 SV=1;sp|Q8WYA6-3|CTBL1_HUMAN Isoform of Q8W	5192;5507;7752;11435;15545	NaN;NaN;NaN;NaN;NaN
34	A0A087WUC6;E9PI68;Q15005;E9PL01;H0YE04;E9PRB9	A0A087WUC6;E9PI68;Q15005;E9PL01;H0YE04	Signal peptidase complex subunit 2	SPCS2	NaN	NaN	NaN	2024600	1340600	483460	NaN	NaN	NaN	6	3	3	3	11.5	11.5	11.5	25.09	0	4.3441	46184000	3848700	12	4	1	1	2	24295000	16087000	5801500	7.9	6.6	6.6	2	2	2	2	2	2	2	2	2	LTFISGR;SIFLVAHR;YVENFGLIDGR	tr|A0A087WUC6|A0A087WUC6_HUMAN Isoform of Q15005, Signal peptidase complex subunit 2 OS=Homo sapiens OX=9606 GN=SPCS2 PE=1 SV=1;tr|E9PI68|E9PI68_HUMAN Isoform of Q15005, Signal peptidase complex subunit 2 OS=Homo sapiens OX=9606 GN=SPCS2 PE=1 SV=1;sp|Q1500	10965;14256;18647	NaN;NaN;NaN
35	A0A087WUD3;Q9NRP0;Q9NRP0-2	A0A087WUD3;Q9NRP0;Q9NRP0-2	Oligosaccharyltransferase complex subunit OSTC	OSTC	NaN	NaN	NaN	12873000	NaN	6682800	NaN	NaN	NaN	3	1	1	1	14.5	14.5	14.5	9.369	0.00043309	3.2286	39111000	19556000	2	2	1	0	1	25746000	0	13366000	14.5	0	14.5	1	0	1	1	0	1	1	0	1	VPFLVLECPNLK	tr|A0A087WUD3|A0A087WUD3_HUMAN Isoform of Q9NRP0, Oligosaccharyltransferase complex subunit OSTC OS=Homo sapiens OX=9606 GN=OSTC PE=1 SV=1;sp|Q9NRP0|OSTC_HUMAN Oligosaccharyltransferase complex subunit OSTC OS=Homo sapiens OX=9606 GN=OSTC PE=1 SV=1;sp|Q9NR	17426	NaN
36	A0A087WUK2;O14979-3;O14979-2;O14979	A0A087WUK2;O14979-3;O14979-2;O14979	Heterogeneous nuclear ribonucleoprotein D-like	HNRNPDL	82437000	71359000	76599000	5228500	3486400	2435900	NaN	NaN	NaN	4	5	4	4	16.5	14.3	14.3	40.04	0	14.908	280030000	11151000	21	10	3	4	3	109800000	97510000	72725000	14	16.5	13.2	4	5	4	3	4	3	3	4	3	GFCFITYTDEEPVKK;GFGFVLFK;KDLTEYLSR;MFIGGLSWDTSK;VFVGGLSPDTSEEQIK	tr|A0A087WUK2|A0A087WUK2_HUMAN Isoform of O14979, Heterogeneous nuclear ribonucleoprotein D-like, isoform CRA_b OS=Homo sapiens OX=9606 GN=HNRNPDL PE=1 SV=1;sp|O14979-3|HNRDL_HUMAN Isoform of O14979, Isoform 3 of Heterogeneous nuclear ribonucleoprotein D-l	5572;5604;8527;11504;16754	NaN;NaN;NaN;NaN;NaN
37	A0A087X1F5;A0A087WYV9;A0A087WUM0;P57105	A0A087X1F5;A0A087WYV9;A0A087WUM0;P57105	Synaptojanin-2-binding protein	SYNJ2BP-COX16;SYNJ2BP	NaN	NaN	NaN	1344200	945240	525070	NaN	NaN	NaN	4	1	1	1	7.9	7.9	7.9	17.188	0	4.8754	31936000	525070	9	4	1	1	2	12097000	8507200	11332000	7.9	7.9	7.9	1	1	1	1	1	1	1	1	1	NLLHQDAVDLFR	tr|A0A087X1F5|A0A087X1F5_HUMAN Isoform of A0A087WUM0, SYNJ2BP-COX16 readthrough (Fragment) OS=Homo sapiens OX=9606 GN=SYNJ2BP-COX16 PE=4 SV=6;tr|A0A087WYV9|A0A087WYV9_HUMAN Isoform of A0A087WUM0, SYNJ2BP-COX16 readthrough OS=Homo sapiens OX=9606 GN=SYNJ2BP	12272	NaN
38	A0A087WUN7;H0YJ40;G3V4X6;G3V2S9;Q9GZT3-2;Q9GZT3;H0YJW7;H0YJI1	A0A087WUN7;H0YJ40;G3V4X6;G3V2S9;Q9GZT3-2;Q9GZT3;H0YJW7	SRA stem-loop-interacting RNA-binding protein, mitochondrial	SLIRP	55068000	61882000	67110000	22134000	6352000	7667900	NaN	NaN	NaN	8	4	4	4	55.4	55.4	55.4	10.353	0	18.714	354940000	36154000	7	14	5	5	4	204340000	70361000	80233000	55.4	55.4	40.2	4	4	3	4	4	3	4	4	3	CILPFDKETGFHR;GLGWVQFSSEEGLR;NALQQENHIIDGVK;SINQPVAFVR	tr|A0A087WUN7|A0A087WUN7_HUMAN Isoform of Q9GZT3, SRA stem-loop-interacting RNA-binding protein, mitochondrial OS=Homo sapiens OX=9606 GN=SLIRP PE=1 SV=1;tr|H0YJ40|H0YJ40_HUMAN Isoform of Q9GZT3, SRA stem-loop-interacting RNA-binding protein, mitochondrial	1834;5965;11879;14300	NaN;NaN;NaN;NaN
39	E7ETK0;A0A2R8Y849;A0A087WUS0;A0A2R8YD14;P62847-2;P62847-3;P62847;P62847-4;A0A2R8Y8A0	E7ETK0;A0A2R8Y849;A0A087WUS0;A0A2R8YD14;P62847-2;P62847-3;P62847;P62847-4;A0A2R8Y8A0	40S ribosomal protein S24	RPS24	84772000	103040000	134570000	34136000	11969000	19011000	NaN	NaN	NaN	9	4	4	4	35.1	35.1	35.1	15.197	0	13.654	508100000	65117000	6	16	7	4	5	259260000	100590000	148260000	35.1	35.1	35.1	4	4	4	4	4	4	4	4	4	MNDTVTIR;QMVIDVLHPGK;TTGFGMIYDSLDYAK;TTPDVIFVFGFR	tr|E7ETK0|E7ETK0_HUMAN Isoform of P62847, 40S ribosomal protein S24 OS=Homo sapiens OX=9606 GN=RPS24 PE=1 SV=1;tr|A0A2R8Y849|A0A2R8Y849_HUMAN Isoform of P62847, 40S ribosomal protein S24 OS=Homo sapiens OX=9606 GN=RPS24 PE=1 SV=1;tr|A0A087WUS0|A0A087WUS0_H	11674;13196;16041;16063	NaN;NaN;NaN;NaN
40	A0A087WUT6;O60841	A0A087WUT6;O60841	Eukaryotic translation initiation factor 5B	EIF5B	27668000	29836000	26698000	1042200	286450	173600	NaN	NaN	NaN	2	10	10	10	12.4	12.4	12.4	138.68	0	22.98	176550000	1502200	52	14	7	3	4	114910000	28397000	33243000	9.5	4.2	8.7	8	3	6	8	3	6	8	3	6	DPIVMGVTVEAGQVK;HFEATDILVSK;ILPQYIFNSR;IPGMLIIDTPGHESFSNLR;LKEGDTIIVPGVEGPIVTQIR;LRAPIICVLGHVDTGK;SEDSTKDDIDLDALAAEIEGAGAAK;TLAGLPLLVAYK;TLAGLPLLVAYKEDEIPVLK;VTVDTGVIPASEEK	tr|A0A087WUT6|A0A087WUT6_HUMAN Isoform of O60841, Eukaryotic translation initiation factor 5B OS=Homo sapiens OX=9606 GN=EIF5B PE=1 SV=1;sp|O60841|IF2P_HUMAN Eukaryotic translation initiation factor 5B OS=Homo sapiens OX=9606 GN=EIF5B PE=1 SV=4	2757;6646;7824;7984;9957;10746;13984;15632;15633;17759	NaN;NaN;NaN;NaN;NaN;NaN;NaN;NaN;NaN;NaN
41	A0A087WUV8;P35613-3;P35613-4;P35613-2;P35613;A0A087X2B5;R4GMX5;I3L192;R4GN83	A0A087WUV8;P35613-3;P35613-4;P35613-2;P35613;A0A087X2B5;R4GMX5;I3L192	Basigin	BSG	65969000	69483000	67372000	17059000	7813100	6914700	NaN	NaN	NaN	9	6	6	6	45	45	45	20.542	0	36.37	509650000	31787000	12	20	8	6	6	282640000	119030000	107980000	36.5	35.4	35.4	5	5	5	5	5	5	5	5	5	FFVSSSQGR;GSDQAIITLR;RKPEDVLDDDDAGSAPLK;SELHIENLNMEADPGQYR;SESVPPVTDWAWYK;SSEHINEGETAMLVCK	tr|A0A087WUV8|A0A087WUV8_HUMAN Isoform of P35613, Basigin OS=Homo sapiens OX=9606 GN=BSG PE=1 SV=1;sp|P35613-3|BASI_HUMAN Isoform of P35613, Isoform 3 of Basigin OS=Homo sapiens OX=9606 GN=BSG;sp|P35613-4|BASI_HUMAN Isoform of P35613, Isoform 4 of Basigin	4628;6268;13581;14021;14042;14778	NaN;NaN;NaN;NaN;NaN;NaN
42	A0A087WV05;Q99417	A0A087WV05;Q99417	C-Myc-binding protein	MYCBP	NaN	NaN	NaN	1606100	NaN	NaN	NaN	NaN	NaN	2	1	1	1	15.5	15.5	15.5	12.755	0.006793	1.8425	12849000	1606100	8	1	1	0	0	12849000	0	0	15.5	0	0	1	0	0	1	0	0	1	0	0	HHLGAATPENPEIELLR	tr|A0A087WV05|A0A087WV05_HUMAN Isoform of C9IYK1, Uncharacterized protein OS=Homo sapiens OX=9606 PE=4 SV=1;sp|Q99417|MYCBP_HUMAN c-Myc-binding protein OS=Homo sapiens OX=9606 GN=MYCBP PE=1 SV=3	6717	NaN
43	A0A087WV29;Q9H0A0-2;Q9H0A0	A0A087WV29;Q9H0A0-2;Q9H0A0	N-acetyltransferase 10	NAT10	NaN	NaN	NaN	37020	57901	114250	NaN	NaN	NaN	3	3	3	3	5.2	5.2	5.2	93.533	0	5.0898	14323000	209170	42	5	3	1	1	7093000	2431800	4798500	2.5	1.6	2.6	1	1	2	1	1	2	1	1	2	AGFVPVYLR;EELEALFLPYDLK;LGQAELVVIDEAAAIPLPLVK	tr|A0A087WV29|A0A087WV29_HUMAN Isoform of Q9H0A0, RNA cytidine acetyltransferase OS=Homo sapiens OX=9606 GN=NAT10 PE=1 SV=1;sp|Q9H0A0-2|NAT10_HUMAN Isoform of Q9H0A0, Isoform 2 of RNA cytidine acetyltransferase OS=Homo sapiens OX=9606 GN=NAT10;sp|Q9H0A0|NA	560;3373;9734	NaN;NaN;NaN
44	A0A087WY94;A0A087WVD7;Q9Y3D8	A0A087WY94;A0A087WVD7;Q9Y3D8	Adenylate kinase isoenzyme 6	TAF9;AK6	NaN	NaN	NaN	3151700	1406400	1675900	NaN	NaN	NaN	3	1	1	1	34	34	34	4.9969	0.00044366	3.4299	12468000	6234000	2	3	1	1	1	6303400	2812900	3351800	34	34	34	1	1	1	1	1	1	1	1	1	MLLPNILLTGTPGVGK	tr|A0A087WY94|A0A087WY94_HUMAN Isoform of Q9Y3D8, Adenylate kinase isoenzyme 6 OS=Homo sapiens OX=9606 GN=AK6 PE=1 SV=1;tr|A0A087WVD7|A0A087WVD7_HUMAN Isoform of Q9Y3D8, Adenylate kinase isoenzyme 6 OS=Homo sapiens OX=9606 GN=AK6 PE=1 SV=1;sp|Q9Y3D8|KAD6_H	11622	NaN
45	Q96JY6-4;Q96JY6-3;Q96JY6;A0A087WVI1;C9JS55;A0A087WU48;C9J0X3;E5RGS7;H0YBP7;B3KPU0;C9J760;C9JSR2;C9K0F0;F8WFB8;A0A087WUQ1;H7C1D1;Q96JY6-2;Q96JY6-5	Q96JY6-4;Q96JY6-3;Q96JY6;A0A087WVI1;C9JS55;A0A087WU48;C9J0X3;E5RGS7;H0YBP7;B3KPU0;C9J760;C9JSR2;C9K0F0;F8WFB8;A0A087WUQ1;H7C1D1;Q96JY6-2;Q96JY6-5	PDZ and LIM domain protein 2	PDLIM2	NaN	NaN	NaN	321620	87047	1020100	NaN	NaN	NaN	18	2	2	2	9.4	9.4	9.4	29.105	0	11.064	18573000	1428700	13	5	2	1	2	4181100	1131600	13261000	9.4	5.4	9.4	2	1	2	2	1	2	2	1	2	ALTVDVAGPAPWGFR;LLQEALEAEER	sp|Q96JY6-4|PDLI2_HUMAN Isoform of Q96JY6, Isoform 4 of PDZ and LIM domain protein 2 OS=Homo sapiens OX=9606 GN=PDLIM2;sp|Q96JY6-3|PDLI2_HUMAN Isoform of Q96JY6, Isoform 3 of PDZ and LIM domain protein 2 OS=Homo sapiens OX=9606 GN=PDLIM2;sp|Q96JY6|PDLI2_HU	1060;10259	NaN;NaN
46	A0A087WVM4;B7ZM99;Q6UB35;H0Y327;Q4VXM1;Q4VXM0;Q5JYA8;Q5JYA3;Q6UB35-2	A0A087WVM4;B7ZM99;Q6UB35;H0Y327	Monofunctional C1-tetrahydrofolate synthase, mitochondrial	MTHFD1L	NaN	NaN	NaN	239390	61890	921370	NaN	NaN	NaN	9	4	4	4	4.7	4.7	4.7	99.31	0	8.2759	56242000	1222600	46	5	1	1	3	11012000	2846900	42383000	2.7	1.6	4.7	2	1	4	2	1	4	2	1	4	AVIELLEK;DFILPISDVR;ITIGQGNTEK;LQPLSPVPSDIEISR	tr|A0A087WVM4|A0A087WVM4_HUMAN Isoform of Q6UB35, Monofunctional C1-tetrahydrofolate synthase, mitochondrial OS=Homo sapiens OX=9606 GN=MTHFD1L PE=1 SV=1;tr|B7ZM99|B7ZM99_HUMAN Isoform of Q6UB35, MTHFD1L protein OS=Homo sapiens OX=9606 GN=MTHFD1L PE=1 SV=1	1602;2179;8260;10696	NaN;NaN;NaN;NaN
47	A0A087WVQ6;Q00610-2;Q00610;J3KS13;P53675-2;P53675;A0A087WX41;K7EJJ5;J3KRF5;J3KSQ2;J3QL20;F5H5N6;A0A087WV74;A0A087WXH4	A0A087WVQ6;Q00610-2;Q00610	Clathrin heavy chain;Clathrin heavy chain 1	CLTC	329080000	308600000	302370000	34661000	16576000	15456000	NaN	NaN	NaN	14	70	70	70	52.1	52.1	52.1	192.06	0	323.31	9804200000	66692000	90	264	100	79	85	5274300000	2335400000	2194600000	48.1	43.1	44.4	64	58	61	64	58	61	64	58	61	ADDPSSYMEVVQAANTSGNWEELVK;AFMTADLPNELIELLEK;AHIAQLCEK;AHMGMFTELAILYSKFKPQK;AHTMTDDVTFWK;ALEHFTDLYDIK;ALEHFTDLYDIKR;AQILPIR;AVDVFFPPEAQNDFPVAMQISEK;AVNYFSK;AYEFAER;CNEPAVWSQLAK;DAMQYASESK;DTELAEELLQWFLQEEK;DTELAEELLQWFLQEEKR;EDKLECSEELGDLVK;EHLELFWSR;ESYVETELIFALAK;EVCFACVDGK;FDVNTSAVQVLIEHIGNLDR;FNALFAQGNYSEAAK;FQSVPAQPGQTSPLLQYFGILLDQGQLNK;GQCDLELINVCNENSLFK;GQFSTDELVAEVEK;GQFSTDELVAEVEKR;HDVVFL…	tr|A0A087WVQ6|A0A087WVQ6_HUMAN Isoform of Q00610, Clathrin heavy chain OS=Homo sapiens OX=9606 GN=CLTC PE=1 SV=1;sp|Q00610-2|CLH1_HUMAN Isoform of Q00610, Isoform 2 of Clathrin heavy chain 1 OS=Homo sapiens OX=9606 GN=CLTC;sp|Q00610|CLH1_HUMAN Clathrin hea	256;507;666;672;683;887;888;1284;1571;1642;1710;1879;2018;2902;2903;3295;3583;4164;4237;4531;4938;5041;6212;6217;6218;6597;6617;6909;7014;7509;8133;8374;8456;8508;8533;8633;8642;8922;9003;9114;9192;9334;9795;10077;10200;10335;10577;11463;12264;12307;12376;12387;13152;13286;13452;13577;13675;13680;14931;14984;15735;15988;16786;16863;16977;17303;17632;17816;18034;18233	NaN;NaN;NaN;NaN;NaN;NaN;NaN;NaN;NaN;NaN;NaN;NaN;NaN;NaN;NaN;NaN;NaN;NaN;NaN;NaN;NaN;NaN;NaN;NaN;NaN;NaN;NaN;NaN;NaN;NaN;NaN;NaN;NaN;NaN;NaN;NaN;NaN;NaN;NaN;NaN;NaN;NaN;NaN;NaN;NaN;NaN;NaN;NaN;NaN;NaN;NaN;NaN;NaN;NaN;NaN;NaN;NaN;NaN;NaN;NaN;NaN;NaN;NaN;NaN;NaN;NaN;NaN;NaN;NaN;NaN
48	A0A087WVZ9;A0A0A0MQR7;P19388;A0A087WVN5;A0A087WWX0	A0A087WVZ9;A0A0A0MQR7;P19388;A0A087WVN5;A0A087WWX0	DNA-directed RNA polymerases I, II, and III subunit RPABC1	POLR2E	NaN	NaN	NaN	NaN	NaN	1076600	NaN	NaN	NaN	5	2	2	2	16.8	16.8	16.8	21.459	0	5.2922	10766000	1076600	10	1	0	0	1	0	0	10766000	0	0	16.8	0	0	2	0	0	2	0	0	2	ALIVVQQGMTPSAK;GYLVTQDELDQTLEEFK	tr|A0A087WVZ9|A0A087WVZ9_HUMAN Isoform of P19388, DNA-directed RNA polymerases I, II, and III subunit RPABC1 OS=Homo sapiens OX=9606 GN=POLR2E PE=1 SV=1;tr|A0A0A0MQR7|A0A0A0MQR7_HUMAN Isoform of P19388, DNA-directed RNA polymerases I, II, and III subunit R	949;6529	NaN;NaN
49	A0A087WW40;Q9Y371-3;Q9Y371;Q9Y371-2	A0A087WW40;Q9Y371-3;Q9Y371;Q9Y371-2	Endophilin-B1	SH3GLB1	NaN	NaN	NaN	416490	145810	133760	NaN	NaN	NaN	4	1	1	1	3.8	3.8	3.8	44.26	0	7.1827	11137000	696060	16	3	1	1	1	6663900	2332900	2140100	3.8	3.8	3.8	1	1	1	1	1	1	1	1	1	ELIQTSALNFLTPLR	tr|A0A087WW40|A0A087WW40_HUMAN Isoform of Q9Y371, Endophilin-B1 OS=Homo sapiens OX=9606 GN=SH3GLB1 PE=1 SV=1;sp|Q9Y371-3|SHLB1_HUMAN Isoform of Q9Y371, Isoform 3 of Endophilin-B1 OS=Homo sapiens OX=9606 GN=SH3GLB1;sp|Q9Y371|SHLB1_HUMAN Endophilin-B1 OS=Hom	3794	NaN
50	A0A087WW77;Q15334	A0A087WW77;Q15334	Lethal(2) giant larvae protein homolog 1	LLGL1	NaN	NaN	NaN	112650	250630	83536	NaN	NaN	NaN	2	3	3	3	3.8	3.8	3.8	114.43	0	4.2847	17873000	446820	40	1	0	1	0	4505900	10025000	3341400	1.4	3.8	1.1	1	3	1	1	3	1	1	3	1	APVVAIAVLDGR;NITEPLCSLDINWPR;TGPLPWPAGFQPR	tr|A0A087WW77|A0A087WW77_HUMAN Isoform of Q15334, Lethal(2) giant larvae protein homolog 1 OS=Homo sapiens OX=9606 GN=LLGL1 PE=1 SV=1;sp|Q15334|L2GL1_HUMAN Lethal(2) giant larvae protein homolog 1 OS=Homo sapiens OX=9606 GN=LLGL1 PE=1 SV=3	1247;12185;15444	NaN;NaN;NaN
51	A0A087WWF4;A0A087X0M4;Q9BWU0	A0A087WWF4;A0A087X0M4;Q9BWU0	Kanadaptin	SLC4A1AP	NaN	NaN	NaN	891380	NaN	NaN	NaN	NaN	NaN	3	1	1	1	3.3	3.3	3.3	30.978	0.00042248	3.0236	12479000	891380	14	1	1	0	0	12479000	0	0	3.3	0	0	1	0	0	1	0	0	1	0	0	ILDTLGLLR	tr|A0A087WWF4|A0A087WWF4_HUMAN Isoform of Q9BWU0, Kanadaptin (Fragment) OS=Homo sapiens OX=9606 GN=SLC4A1AP PE=1 SV=1;tr|A0A087X0M4|A0A087X0M4_HUMAN Isoform of Q9BWU0, Kanadaptin OS=Homo sapiens OX=9606 GN=SLC4A1AP PE=1 SV=1;sp|Q9BWU0|NADAP_HUMAN Kanadapti	7716	NaN
52	H7C1B3;F8W8R3;A0A087WWF6;P49005	H7C1B3;F8W8R3;A0A087WWF6;P49005	DNA polymerase delta subunit 2	POLD2	NaN	NaN	NaN	NaN	2502900	2298000	NaN	NaN	NaN	4	1	1	1	16.9	16.9	16.9	9.2495	0.001225	2.7776	14402000	4800800	3	0	0	0	0	0	7508600	6893900	0	16.9	16.9	0	1	1	0	1	1	0	1	1	FLGTSGQNVSDIFR	tr|H7C1B3|H7C1B3_HUMAN Isoform of P49005, DNA polymerase delta subunit 2 (Fragment) OS=Homo sapiens OX=9606 GN=POLD2 PE=1 SV=1;tr|F8W8R3|F8W8R3_HUMAN Isoform of P49005, DNA polymerase delta subunit 2 OS=Homo sapiens OX=9606 GN=POLD2 PE=1 SV=1;tr|A0A087WWF6	4845	NaN
53	A6NKE1;A0A087WWM0;O43617-2;O43617	A6NKE1;A0A087WWM0;O43617-2;O43617	Trafficking protein particle complex subunit 3	TRAPPC3	NaN	NaN	NaN	NaN	1335000	1178000	NaN	NaN	NaN	4	1	1	1	6.8	6.8	6.8	13.343	0.0022565	2.258	15078000	2513000	6	2	0	1	1	0	8010000	7067700	0	6.8	6.8	0	1	1	0	1	1	0	1	1	LIEDFLAR	tr|A6NKE1|A6NKE1_HUMAN Isoform of O43617, Trafficking protein particle complex subunit 3 OS=Homo sapiens OX=9606 GN=TRAPPC3 PE=1 SV=1;tr|A0A087WWM0|A0A087WWM0_HUMAN Isoform of O43617, Trafficking protein particle complex subunit OS=Homo sapiens OX=9606 GN=	9852	NaN
54	A0A087WWP4;Q96T37-4;Q96T37-2;Q96T37-3;Q96T37	A0A087WWP4;Q96T37-4;Q96T37-2;Q96T37-3;Q96T37	Putative RNA-binding protein 15	RBM15	NaN	NaN	NaN	17369	NaN	NaN	NaN	NaN	NaN	5	1	1	1	1.8	1.8	1.8	102.13	0.0012151	2.7147	920570	17369	53	1	1	0	0	920570	0	0	1.8	0	0	1	0	0	1	0	0	1	0	0	LWVGGLGPWVPLAALAR	tr|A0A087WWP4|A0A087WWP4_HUMAN Isoform of Q96T37, RNA-binding protein 15 OS=Homo sapiens OX=9606 GN=RBM15 PE=1 SV=1;sp|Q96T37-4|RBM15_HUMAN Isoform of Q96T37, Isoform 4 of RNA-binding protein 15 OS=Homo sapiens OX=9606 GN=RBM15;sp|Q96T37-2|RBM15_HUMAN Isof	11291	NaN
55	A0A087WWS1;Q96FV9;J3KT14;A0A087WY84;Q96FV9-2	A0A087WWS1;Q96FV9;J3KT14;A0A087WY84;Q96FV9-2	THO complex subunit 1	THOC1	NaN	NaN	NaN	210570	69642	NaN	NaN	NaN	NaN	5	2	2	2	2.4	2.4	2.4	75.651	0.00046425	3.7995	10088000	280210	36	1	1	0	0	7580400	2507100	0	1.1	1.4	0	1	1	0	1	1	0	1	1	0	ILAPYLEMK;IQLFLAR	tr|A0A087WWS1|A0A087WWS1_HUMAN Isoform of Q96FV9, THO complex subunit 1 OS=Homo sapiens OX=9606 GN=THOC1 PE=1 SV=1;sp|Q96FV9|THOC1_HUMAN THO complex subunit 1 OS=Homo sapiens OX=9606 GN=THOC1 PE=1 SV=1;tr|J3KT14|J3KT14_HUMAN Isoform of Q96FV9, THO complex	7688;8054	NaN;NaN
56	A0A087WX29;Q13148;K7EJM5;K7EN94;B1AKP7;G3V162;A0A087X260;A0A087WYY0;K7EJ99;A0A0A0MSV7;A0A087WXQ5;A0A087WV68;A0A1W2PNU8;Q13148-4	A0A087WX29;Q13148;K7EJM5;K7EN94;B1AKP7;G3V162;A0A087X260;A0A087WYY0	TAR DNA-binding protein 43	TARDBP	78861000	34589000	28441000	4955300	2006200	2738600	NaN	NaN	NaN	14	3	3	3	22.2	22.2	22.2	26.743	0	40.516	138850000	9700100	11	7	2	2	3	81779000	24837000	32231000	14.8	14.8	22.2	2	2	3	2	2	3	2	2	3	FGGNPGGFGNQGGFGNSR;LVEGILHAPDAGWGNLVYVVNYPK;TSDLIVLGLPWK	tr|A0A087WX29|A0A087WX29_HUMAN Isoform of Q13148, TAR DNA-binding protein 43 (Fragment) OS=Homo sapiens OX=9606 GN=TARDBP PE=1 SV=1;sp|Q13148|TADBP_HUMAN TAR DNA-binding protein 43 OS=Homo sapiens OX=9606 GN=TARDBP PE=1 SV=1;tr|K7EJM5|K7EJM5_HUMAN Isoform	4656;11105;15971	NaN;NaN;NaN
57	A0A087WX74;B7ZL31;Q9HAZ1	A0A087WX74;B7ZL31;Q9HAZ1	Dual specificity protein kinase CLK4	CLK4	NaN	NaN	NaN	4130500	NaN	2203500	NaN	NaN	NaN	3	1	1	1	2.4	2.4	2.4	44.698	1	-2	126680000	6334000	20	1	0	0	1	82610000	0	44070000	2.4	0	2.4	1	0	1	1	0	1	1	0	1	IVKNVGRYR	tr|A0A087WX74|A0A087WX74_HUMAN Isoform of Q9HAZ1, Dual-specificity protein kinase CLK4 OS=Homo sapiens OX=9606 GN=CLK4 PE=1 SV=1;tr|B7ZL31|B7ZL31_HUMAN Isoform of Q9HAZ1, CLK4 protein OS=Homo sapiens OX=9606 GN=CLK4 PE=1 SV=1;sp|Q9HAZ1|CLK4_HUMAN Dual spec	8371	NaN
58	A0A087WXC5;E7ESZ7;O95299;O95299-2;C9J6X0;H7C2W5;H7C1Y7;H7C2X4;Q8N1B9	A0A087WXC5;E7ESZ7;O95299;O95299-2;C9J6X0	NADH dehydrogenase [ubiquinone] 1 alpha subcomplex subunit 10, mitochondrial	NDUFA10	21967000	15950000	NaN	612800	350930	150640	NaN	NaN	NaN	9	3	3	3	17.2	17.2	17.2	40.836	0	15.762	51878000	963720	19	6	3	2	1	37727000	11289000	2862200	17.2	10.1	6.2	3	2	1	3	2	1	3	2	1	FEVLNYTSIPIFLPEVTIGAHQTDR;ITSAYLQDIENAYK;LLQYSDALEHLLTTGQGVVLER	tr|A0A087WXC5|A0A087WXC5_HUMAN Isoform of O95299, NADH dehydrogenase [ubiquinone] 1 alpha subcomplex subunit 10, mitochondrial OS=Homo sapiens OX=9606 GN=NDUFA10 PE=1 SV=1;tr|E7ESZ7|E7ESZ7_HUMAN Isoform of O95299, NADH dehydrogenase [ubiquinone] 1 alpha su	4587;8297;10274	NaN;NaN;NaN
59	A0A087WXL3;O75417	A0A087WXL3;O75417	DNA polymerase theta	POLQ	NaN	NaN	NaN	NaN	13682	130810	NaN	NaN	NaN	2	2	2	2	0.8	0.8	0.8	305.23	0.0044118	2.0698	20518000	144490	142	1	0	0	1	0	1942800	18575000	0	0.3	0.5	0	1	1	0	1	1	0	1	1	EEFAMNLLR;HFSSLDIAVCTIER	tr|A0A087WXL3|A0A087WXL3_HUMAN Isoform of O75417, DNA polymerase theta OS=Homo sapiens OX=9606 GN=POLQ PE=1 SV=1;sp|O75417|DPOLQ_HUMAN DNA polymerase theta OS=Homo sapiens OX=9606 GN=POLQ PE=1 SV=2	3350;6661	NaN;NaN
60	A0A087WXM6;J3QQT2;J3KRX5;A0A0A6YYL6;P18621;P18621-3;J3QLC8;A0A0A0MRF8;P18621-2;J3KRB3;A0A087WWH0;J3QS96;A0A087WY81;J3KSJ0	A0A087WXM6;J3QQT2;J3KRX5;A0A0A6YYL6;P18621;P18621-3;J3QLC8;A0A0A0MRF8;P18621-2;J3KRB3;A0A087WWH0;J3QS96;A0A087WY81	60S ribosomal protein L17	RPL17;RPL17-C18orf32	102150000	118490000	151650000	15274000	11488000	9343500	NaN	NaN	NaN	14	6	6	6	45	45	45	19.586	0	19.503	780040000	36105000	9	25	7	9	9	304640000	231160000	244250000	34.3	40.2	34.3	5	5	4	5	5	4	5	5	4	EQIVPKPEEEVAQK;GLDVDSLVIEHIQVNK;INPYMSSPCHIEMILTEK;QWGWTQGR;SAEFLLHMLK;YSLDPENPTK	tr|A0A087WXM6|A0A087WXM6_HUMAN Isoform of P18621, 60S ribosomal protein L17 (Fragment) OS=Homo sapiens OX=9606 GN=RPL17 PE=3 SV=1;tr|J3QQT2|J3QQT2_HUMAN Isoform of P18621, 60S ribosomal protein L17 (Fragment) OS=Homo sapiens OX=9606 GN=RPL17 PE=3 SV=1;tr|J	4049;5920;7947;13375;13808;18583	NaN;NaN;NaN;NaN;NaN;NaN
61	P50895;A0A087WXM8;K7ENU8	P50895;A0A087WXM8	Basal cell adhesion molecule	BCAM	NaN	NaN	NaN	236150	856910	153500	NaN	NaN	NaN	3	3	3	3	5.7	5.7	5.7	67.404	0	5.8042	37397000	1246600	30	5	1	3	1	7084400	25707000	4604900	1.8	5.7	1.8	1	3	1	1	3	1	1	3	1	EGDEVTLICSAR;LSVPPLVEVMR;VAYLDPLELSEGK	sp|P50895|BCAM_HUMAN Basal cell adhesion molecule OS=Homo sapiens OX=9606 GN=BCAM PE=1 SV=2;tr|A0A087WXM8|A0A087WXM8_HUMAN Isoform of P50895, Basal cell adhesion molecule OS=Homo sapiens OX=9606 GN=BCAM PE=1 SV=1	3483;10914;16413	NaN;NaN;NaN
62	A0A087WXP3;E9PEE8;P18564-2;P18564	A0A087WXP3;E9PEE8;P18564-2;P18564	Integrin beta;Integrin beta-6	ITGB6	NaN	NaN	NaN	5137900	2868100	2728500	NaN	NaN	NaN	4	1	1	1	1.3	1.3	1.3	75.849	0.0022573	2.2601	364970000	10735000	34	3	1	1	1	174690000	97516000	92769000	1.3	1.3	1.3	1	1	1	1	1	1	1	1	1	LGFGSFVEK	tr|A0A087WXP3|A0A087WXP3_HUMAN Isoform of P18564, Integrin beta OS=Homo sapiens OX=9606 GN=ITGB6 PE=1 SV=1;tr|E9PEE8|E9PEE8_HUMAN Isoform of P18564, Integrin beta OS=Homo sapiens OX=9606 GN=ITGB6 PE=1 SV=1;sp|P18564-2|ITB6_HUMAN Isoform of P18564, Isoform	9644	NaN
63	O43681;A0A087WXS7;K7ERW9	O43681;A0A087WXS7	ATPase ASNA1	ASNA1	24503000	23136000	21591000	3531400	689900	417540	NaN	NaN	NaN	3	6	6	6	23.9	23.9	23.9	38.792	0	14.102	156180000	4638900	15	15	6	4	5	106020000	26725000	23437000	17.8	15.2	21.8	5	4	5	5	4	5	5	4	5	ESVLIISTDPAHNISDAFDQK;IDTHNIIVNQLVFPDPEKPCK;LEETLPVIR;LPLLPHEVR;WIFVGGK;YLDQMEDLYEDFHIVK	sp|O43681|ASNA_HUMAN ATPase ASNA1 OS=Homo sapiens OX=9606 GN=ASNA1 PE=1 SV=2;tr|A0A087WXS7|A0A087WXS7_HUMAN Isoform of O43681, ATPase ASNA1 OS=Homo sapiens OX=9606 GN=ASNA1 PE=1 SV=1	4155;7203;9363;10532;18020;18412	NaN;NaN;NaN;NaN;NaN;NaN
64	H7BXI1;A0A087WXU3;A0FGR8-2;A0FGR8;A0FGR8-6;A0FGR8-4;A0FGR8-5	H7BXI1;A0A087WXU3;A0FGR8-2;A0FGR8;A0FGR8-6;A0FGR8-4	Extended synaptotagmin-2	ESYT2	NaN	25924000	17721000	362680	402250	309320	NaN	NaN	NaN	7	4	4	4	6.2	6.2	6.2	98.008	0	5.5176	47267000	1074300	44	4	0	2	2	15958000	17699000	13610000	1.4	4.5	6.2	1	3	4	1	3	4	1	3	4	ITVPLVSEVQIAQLR;LEWLTLMPNASNLDK;LLDEWFTLDEVPK;VLVALASEELAK	tr|H7BXI1|H7BXI1_HUMAN Isoform of A0FGR8, Extended synaptotagmin-2 (Fragment) OS=Homo sapiens OX=9606 GN=ESYT2 PE=1 SV=1;tr|A0A087WXU3|A0A087WXU3_HUMAN Isoform of A0FGR8, Extended synaptotagmin-2 OS=Homo sapiens OX=9606 GN=ESYT2 PE=1 SV=1;sp|A0FGR8-2|ESYT2	8309;9468;10025;17270	NaN;NaN;NaN;NaN
65	A0A087WY00;G3V394;F8WE88;F8W6H6;Q9Y4I1-2;Q9Y4I1;Q9Y4I1-3;E7ERV5	A0A087WY00;G3V394;F8WE88;F8W6H6;Q9Y4I1-2;Q9Y4I1;Q9Y4I1-3;E7ERV5	Unconventional myosin-Va	MYO5A	NaN	NaN	NaN	101510	23675	NaN	NaN	NaN	NaN	8	2	2	1	1.4	1.4	0.8	212.2	0.00082338	2.8218	12017000	125180	96	2	1	1	0	9744600	2272800	0	0.8	0.7	0	1	1	0	1	1	0	1	0	0	LGILDLLDEECK;VLNLYTPVNEFEER	tr|A0A087WY00|A0A087WY00_HUMAN Isoform of Q9Y4I1, Unconventional myosin-Va OS=Homo sapiens OX=9606 GN=MYO5A PE=1 SV=1;tr|G3V394|G3V394_HUMAN Isoform of Q9Y4I1, Unconventional myosin-Va OS=Homo sapiens OX=9606 GN=MYO5A PE=1 SV=1;tr|F8WE88|F8WE88_HUMAN Isofo	9675;17183	NaN;NaN
66	A0A087WY55;Q9NP79;Q5TGM0;Q9NP79-2	A0A087WY55;Q9NP79;Q5TGM0;Q9NP79-2	Vacuolar protein sorting-associated protein VTA1 homolog	VTA1	15962000	17382000	17643000	2412100	1194500	1159700	NaN	NaN	NaN	4	3	3	3	15	15	15	31.102	0	6.8348	70040000	4766400	12	10	2	4	4	28946000	21240000	19854000	7.9	15	15	2	3	3	2	3	3	2	3	3	AALAPLPPLPAQFK;LTPEDFAR;YAGSALQYEDVSTAVQNLQK	tr|A0A087WY55|A0A087WY55_HUMAN Isoform of Q9NP79, Chromosome 6 open reading frame 55, isoform CRA_b OS=Homo sapiens OX=9606 GN=VTA1 PE=1 SV=1;sp|Q9NP79|VTA1_HUMAN Vacuolar protein sorting-associated protein VTA1 homolog OS=Homo sapiens OX=9606 GN=VTA1 PE=1	103;11012;18104	NaN;NaN;NaN
67	A0A087WY71;E9PFW3;Q96CW1-2;Q96CW1;C9JJ47;C9JJD3;H7C4C3;C9JPV8;C9JTK4	A0A087WY71;E9PFW3;Q96CW1-2;Q96CW1	AP-2 complex subunit mu	AP2M1	NaN	NaN	NaN	170280	430560	241720	NaN	NaN	NaN	9	5	5	4	15.7	15.7	14.1	49.526	0	14.197	30112000	842570	26	6	2	3	1	12633000	11195000	6284800	8.1	7.6	3.7	2	3	1	2	3	1	2	2	1	IPTPLNTSGVQVICMK;LNYSDHDVIK;NAVDAFR;SISFIPPDGEFELMR;WARPPISMNFEVPFAPSGLK	tr|A0A087WY71|A0A087WY71_HUMAN Isoform of Q96CW1, AP-2 complex subunit mu OS=Homo sapiens OX=9606 GN=AP2M1 PE=1 SV=1;tr|E9PFW3|E9PFW3_HUMAN Isoform of Q96CW1, AP-2 complex subunit mu OS=Homo sapiens OX=9606 GN=AP2M1 PE=1 SV=1;sp|Q96CW1-2|AP2M1_HUMAN Isofor	8010;10475;11895;14325;17981	NaN;NaN;NaN;NaN;NaN
68	A0A087WY82;Q9Y624	A0A087WY82;Q9Y624	Junctional adhesion molecule A	F11R	52615000	NaN	31280000	3236600	1862800	1190600	NaN	NaN	NaN	2	2	2	2	12.2	12.2	12.2	30.197	0	4.9217	129560000	6290000	14	5	2	1	2	80499000	26079000	22979000	12.2	3.9	12.2	2	1	2	2	1	2	2	1	2	LIVLVPPSKPTVNIPSSATIGNR;VTFLPTGITFK	tr|A0A087WY82|A0A087WY82_HUMAN Isoform of Q9Y624, Junctional adhesion molecule A OS=Homo sapiens OX=9606 GN=F11R PE=1 SV=1;sp|Q9Y624|JAM1_HUMAN Junctional adhesion molecule A OS=Homo sapiens OX=9606 GN=F11R PE=1 SV=1	9938;17685	NaN;NaN
69	P61077-3;P61077-2;P61077;A0A087WY85;D6RFM0;P62837;P62837-2;A0A0A0MQU3;H9KV45;D6RA11;D6RAH7;D6R980;D6RAW0;D6RIZ3;D6R9F6;A0A087WW00;D6R933;D6RGD0;P51668;Q9Y2X8;C9J9H9	P61077-3;P61077-2;P61077;A0A087WY85;D6RFM0;P62837;P62837-2;A0A0A0MQU3;H9KV45;D6RA11;D6RAH7	Ubiquitin-conjugating enzyme E2 D3;Ubiquitin-conjugating enzyme E2 D2	UBE2D3;UBE2D2	48552000	42369000	37651000	21660000	7562500	6316500	NaN	NaN	NaN	21	3	3	3	32.9	32.9	32.9	16.893	0	9.5032	142160000	35539000	4	8	4	2	2	86641000	30250000	25266000	32.9	12.1	12.1	3	1	1	3	1	1	3	1	1	ELSDLAR;IYHPNINSNGSICLDILR;VLLSICSLLCDPNPDDPLVPEIAR	sp|P61077-3|UB2D3_HUMAN Isoform of P61077, Isoform 3 of Ubiquitin-conjugating enzyme E2 D3 OS=Homo sapiens OX=9606 GN=UBE2D3;sp|P61077-2|UB2D3_HUMAN Isoform of P61077, Isoform 2 of Ubiquitin-conjugating enzyme E2 D3 OS=Homo sapiens OX=9606 GN=UBE2D3;sp|P61	3886;8453;17170	NaN;NaN;NaN
70	A0A087WYC0;Q9NVV4-2;A0A2Q2TH77;Q08379-2;Q08379	A0A087WYC0;Q9NVV4-2;A0A2Q2TH77;Q08379-2;Q08379	Golgin subfamily A member 2	GOLGA2	NaN	NaN	NaN	622060	261710	169010	NaN	NaN	NaN	5	1	1	1	3.5	3.5	3.5	31.894	0.0004787	4.115	12633000	1052800	12	2	0	1	1	7464700	3140500	2028100	3.5	3.5	3.5	1	1	1	1	1	1	1	1	1	LLELQELVLR	tr|A0A087WYC0|A0A087WYC0_HUMAN Isoform of Q08379, Golgin subfamily A member 2 OS=Homo sapiens OX=9606 GN=GOLGA2 PE=1 SV=1;sp|Q9NVV4-2|PAPD1_HUMAN Isoform of Q9NVV4, Isoform 2 of Poly(A) RNA polymerase, mitochondrial OS=Homo sapiens OX=9606 GN=MTPAP;tr|A0A2	10072	NaN
71	A0A140T9S0;A0A0G2JLV0;A0A087WYD6;X5CMH5;E7ENX8;Q03519-2;Q03519	A0A140T9S0;A0A0G2JLV0;A0A087WYD6;X5CMH5;E7ENX8;Q03519-2;Q03519	Antigen peptide transporter 2	TAP2	NaN	NaN	NaN	123020	77682	52012	NaN	NaN	NaN	7	1	1	1	1.4	1.4	1.4	72.046	0.0012235	2.7633	7076000	252710	28	3	1	1	1	3444600	2175100	1456400	1.4	1.4	1.4	1	1	1	1	1	1	1	1	1	LGGLWGLLK	tr|A0A140T9S0|A0A140T9S0_HUMAN Isoform of Q03519, Antigen peptide transporter 2 OS=Homo sapiens OX=9606 GN=TAP2 PE=1 SV=1;tr|A0A0G2JLV0|A0A0G2JLV0_HUMAN Isoform of Q03519, Antigen peptide transporter 2 OS=Homo sapiens OX=9606 GN=TAP2 PE=1 SV=1;tr|A0A087WYD	9657	NaN
72	A0A087WYF6;F8W7U3;J3KP36;E7ESD2;A0A0A0MR88;A0A096LPC5;Q9Y4E1-5;Q9Y4E1-3;Q9Y4E1-6;Q9Y4E1-2;Q9Y4E1-1;Q9Y4E1;Q641Q2-2;Q641Q2;A0A0A0MT65;Q5SRD0	A0A087WYF6;F8W7U3;J3KP36;E7ESD2;A0A0A0MR88;A0A096LPC5;Q9Y4E1-5;Q9Y4E1-3;Q9Y4E1-6;Q9Y4E1-2;Q9Y4E1-1;Q9Y4E1;Q641Q2-2;Q641Q2;A0A0A0MT65;Q5SRD0	WASH complex subunit FAM21C;WASH complex subunit FAM21A;Putative WASH complex subunit FAM21	FAM21A;FAM21C;FAM21D	NaN	NaN	NaN	12629	21730	NaN	NaN	NaN	NaN	16	2	2	2	3	3	3	136.57	0.0015396	2.3968	2095900	21730	61	2	1	1	0	770380	1325500	0	1.8	1.2	0	1	1	0	1	1	0	1	1	0	VQEAVNYGLQVLDSAFEQLDIK;VSNIFDDPLNAFGGQ	tr|A0A087WYF6|A0A087WYF6_HUMAN Isoform of Q641Q2, WASH complex subunit 2A OS=Homo sapiens OX=9606 GN=WASHC2A PE=1 SV=1;tr|F8W7U3|F8W7U3_HUMAN Isoform of Q641Q2, WASH complex subunit 2A OS=Homo sapiens OX=9606 GN=WASHC2A PE=1 SV=1;tr|J3KP36|J3KP36_HUMAN Iso	17497;17621	NaN;NaN
73	A0A087WYN9;Q7Z478	A0A087WYN9;Q7Z478	ATP-dependent RNA helicase DHX29	DHX29	NaN	NaN	NaN	104400	31279	30038	NaN	NaN	NaN	2	3	3	3	3.6	3.6	3.6	155.29	0	5.9214	12889000	165720	71	5	3	1	1	8535700	2220800	2132700	3.6	0.7	0.7	3	1	1	3	1	1	3	1	1	ALDPPQLQVISNAMNLLR;ETTLITPFPVLLFGGDIEVQHR;ILQIITELIK	tr|A0A087WYN9|A0A087WYN9_HUMAN Isoform of Q7Z478, ATP-dependent RNA helicase DHX29 OS=Homo sapiens OX=9606 GN=DHX29 PE=1 SV=1;sp|Q7Z478|DHX29_HUMAN ATP-dependent RNA helicase DHX29 OS=Homo sapiens OX=9606 GN=DHX29 PE=1 SV=2	867;4222;7835	NaN;NaN;NaN
74	A0A087WYR0;P09132;A0A2U3TZN1;A0A087WWU9;D6RBG4;A0A2R8Y4M3;P09132-2	A0A087WYR0;P09132;A0A2U3TZN1;A0A087WWU9	Signal recognition particle 19 kDa protein	SRP19	22758000	21429000	NaN	6079200	2683000	2283400	NaN	NaN	NaN	7	3	3	3	31.7	31.7	31.7	13.654	0	7.9699	66274000	11046000	6	6	2	2	2	36475000	16098000	13701000	21.7	21.7	20	2	2	2	2	2	2	2	2	2	FICIYPAYLNNK;QEDGSLCLVQFPSR;SVMLYAAEMIPK	tr|A0A087WYR0|A0A087WYR0_HUMAN Isoform of P09132, Signal recognition particle 19 kDa protein OS=Homo sapiens OX=9606 GN=SRP19 PE=1 SV=1;sp|P09132|SRP19_HUMAN Signal recognition particle 19 kDa protein OS=Homo sapiens OX=9606 GN=SRP19 PE=1 SV=3;tr|A0A2U3TZN	4745;12902;14982	NaN;NaN;NaN
75	A0A087WYT3;Q15185-4;Q15185;Q15185-3;B4DDC6;Q15185-2	A0A087WYT3;Q15185-4;Q15185;Q15185-3;B4DDC6	Prostaglandin E synthase 3	PTGES3	492850000	518520000	497170000	142770000	62975000	48868000	NaN	NaN	NaN	6	7	7	7	40.9	40.9	40.9	19.155	0	66.578	2999400000	254620000	8	34	14	10	10	1636000000	757980000	605400000	40.9	40.2	35.4	7	6	5	7	6	5	7	6	5	DVNVNFEK;GESGQSWPR;HLNEIDLFHCIDPNDSK;KGESGQSWPR;LNWLSVDFNNWK;LTFSCLGGSDNFK;SILCCLR	tr|A0A087WYT3|A0A087WYT3_HUMAN Isoform of Q15185, Prostaglandin E synthase 3 OS=Homo sapiens OX=9606 GN=PTGES3 PE=1 SV=1;sp|Q15185-4|TEBP_HUMAN Isoform of Q15185, Isoform 4 of Prostaglandin E synthase 3 OS=Homo sapiens OX=9606 GN=PTGES3;sp|Q15185|TEBP_HUMA	2998;5541;6782;8667;10473;10967;14273	NaN;NaN;NaN;NaN;NaN;NaN;NaN
76	A0A087WZ13;E9PAU2;Q8IY67-2;Q8IY67;K7EKR9;Q8IY67-3	A0A087WZ13;E9PAU2;Q8IY67-2;Q8IY67	Ribonucleoprotein PTB-binding 1	RAVER1	23193000	18112000	17111000	629830	218270	198500	NaN	NaN	NaN	6	7	7	7	16.2	16.2	16.2	77.843	0	37.895	140830000	1046600	25	17	7	5	5	93041000	25784000	22005000	14.5	9.2	9.7	6	4	4	6	4	4	6	4	4	ALSAVHSPTFCQLACGQDGQLK;DSGPLPTPPGVSLLGEPPK;GKPPPLLPSVLGPAGGDR;GLPGDVTNQEVHDLLSDYELK;SDLLGKPLGPR;SGAEVEAGDAAER;SMLAALIAAQATALNR	tr|A0A087WZ13|A0A087WZ13_HUMAN Isoform of Q8IY67, Ribonucleoprotein PTB-binding 1 OS=Homo sapiens OX=9606 GN=RAVER1 PE=1 SV=1;tr|E9PAU2|E9PAU2_HUMAN Isoform of Q8IY67, Ribonucleoprotein PTB-binding 1 OS=Homo sapiens OX=9606 GN=RAVER1 PE=1 SV=1;sp|Q8IY67-2|	1031;2853;5887;6005;13928;14114;14574	NaN;NaN;NaN;NaN;NaN;NaN;NaN
77	B7Z385;A0A087X0J3;A0A087WZ15;E9PDI2;P40123-2;P40123;P40123-3;F8WEW0;F8WDB9	B7Z385;A0A087X0J3;A0A087WZ15;E9PDI2;P40123-2;P40123;P40123-3	Adenylyl cyclase-associated protein;Adenylyl cyclase-associated protein 2	CAP2	NaN	16424000	16873000	NaN	633220	603740	NaN	NaN	NaN	9	3	2	2	9.3	7.1	7.1	39.911	0	4.8646	27213000	1237000	22	4	0	2	2	0	13931000	13282000	0	9.3	9.3	0	3	3	0	2	2	0	2	2	LMDSMVAEFLK;SALFAQLNQGEAITK;VPTISINK	tr|B7Z385|B7Z385_HUMAN Isoform of P40123, Adenylyl cyclase-associated protein OS=Homo sapiens OX=9606 GN=CAP2 PE=1 SV=1;tr|A0A087X0J3|A0A087X0J3_HUMAN Isoform of P40123, Adenylyl cyclase-associated protein OS=Homo sapiens OX=9606 GN=CAP2 PE=1 SV=1;tr|A0A08	10348;13835;17469	NaN;NaN;NaN
78	M0R0V2;A0A087WZK0;P49366-3;P49366	M0R0V2;A0A087WZK0;P49366-3;P49366	Deoxyhypusine synthase	DHPS	NaN	NaN	NaN	484410	74879	52076	NaN	NaN	NaN	4	1	1	1	8.2	8.2	8.2	17.831	0	5.2308	6113600	611360	10	0	0	0	0	4844100	748790	520760	8.2	8.2	8.2	1	1	1	1	1	1	1	1	1	NPGLVLDIVEDLR	tr|M0R0V2|M0R0V2_HUMAN Isoform of P49366, Deoxyhypusine synthase (Fragment) OS=Homo sapiens OX=9606 GN=DHPS PE=1 SV=1;tr|A0A087WZK0|A0A087WZK0_HUMAN Isoform of P49366, Deoxyhypusine synthase OS=Homo sapiens OX=9606 GN=DHPS PE=1 SV=1;sp|P49366-3|DHYS_HUMAN	12411	NaN
79	A0A087WZK9;B3KS98;O15372;E5RJT0;E5RGU4;E5RFW7;E5RFH0	A0A087WZK9;B3KS98;O15372	Eukaryotic translation initiation factor 3 subunit H	EIF3H	31698000	33075000	36562000	3583000	2020400	3481700	NaN	NaN	NaN	7	9	9	9	32.4	32.4	32.4	39.589	0	21.296	277810000	9085100	20	17	5	5	7	130960000	58270000	88578000	19.8	15.2	22.9	5	5	7	5	5	7	5	5	7	DFSPEALKK;EFTAQNLGK;HYQEEGQGTEVVQGVLLGLVVEDR;LFKPPQPPAR;LFMAQALQEYNN;MDSLLIAGQINTYCQNIK;NLQLLMDR;NSHLINVLMWELEK;TAQGSLSLK	tr|A0A087WZK9|A0A087WZK9_HUMAN Isoform of O15372, Eukaryotic translation initiation factor 3 subunit H OS=Homo sapiens OX=9606 GN=EIF3H PE=1 SV=1;tr|B3KS98|B3KS98_HUMAN Isoform of O15372, Eukaryotic translation initiation factor 3 subunit H OS=Homo sapiens	2215;3460;7003;9526;9536;11428;12306;12483;15134	NaN;NaN;NaN;NaN;NaN;NaN;NaN;NaN;NaN
80	A0A087X2E5;A0A087WZN1;O43837-2;O43837;O43837-3;A0A0D9SG66	A0A087X2E5;A0A087WZN1;O43837-2;O43837;O43837-3	Isocitrate dehydrogenase [NAD] subunit, mitochondrial;Isocitrate dehydrogenase [NAD] subunit beta, mitochondrial	IDH3B	NaN	NaN	NaN	1154600	265580	244310	NaN	NaN	NaN	6	4	4	4	12.2	12.2	12.2	41.219	0	7.1716	69610000	1664500	20	4	2	1	1	43480000	13647000	12483000	7.7	7.4	2.9	3	2	1	3	2	1	3	2	1	FAFDYATK;HNNLDLVIIR;LDLFANVVHVK;NIANPTAMLLSASNMLR	tr|A0A087X2E5|A0A087X2E5_HUMAN Isoform of O43837, Isocitrate dehydrogenase [NAD] subunit, mitochondrial OS=Homo sapiens OX=9606 GN=IDH3B PE=1 SV=1;tr|A0A087WZN1|A0A087WZN1_HUMAN Isoform of O43837, Isocitrate dehydrogenase [NAD] subunit, mitochondrial OS=Ho	4410;6824;9247;12119	NaN;NaN;NaN;NaN
81	Q9Y3A5;A0A087X020;F8WE72	Q9Y3A5;A0A087X020	Ribosome maturation protein SBDS	SBDS	25151000	26933000	30078000	5579500	2985400	1427200	NaN	NaN	NaN	3	8	8	8	32.4	32.4	32.4	28.763	0	15.57	205440000	9992000	17	17	5	7	5	112120000	60745000	32572000	25.2	29.2	24.8	6	7	6	6	7	6	6	7	6	DIATIVADK;DLDEVLQTHSVFVNVSK;FILPVNEGK;GEVQVSDKER;GSLEVLNLK;HTQLEQMFR;LTNVAVVR;SIFTPTNQIR	sp|Q9Y3A5|SBDS_HUMAN Ribosome maturation protein SBDS OS=Homo sapiens OX=9606 GN=SBDS PE=1 SV=4;tr|A0A087X020|A0A087X020_HUMAN Isoform of Q9Y3A5, Ribosome maturation protein SBDS OS=Homo sapiens OX=9606 GN=SBDS PE=1 SV=1	2360;2507;4770;5552;6290;6938;11011;14259	NaN;NaN;NaN;NaN;NaN;NaN;NaN;NaN
82	A0A087X054;Q9Y4L1;E9PJ21;A0A087WWI4;K7EQK2;Q9Y4L1-2;J3KTF1;J3QL06;Q9BST8;J3QQH7;J3QLE9;A0A087X214;A0A087WW13;A0A2R8Y358;A0A1W2PS94;Q9BXT5	A0A087X054;Q9Y4L1;E9PJ21;A0A087WWI4;K7EQK2;Q9Y4L1-2	Hypoxia up-regulated protein 1	HYOU1	69771000	74688000	72707000	9396400	3910500	3916200	NaN	NaN	NaN	16	26	26	26	37.6	37.6	37.6	104.78	0	121.64	1225100000	17223000	48	97	31	33	33	630850000	296030000	298240000	30.8	32.8	32.6	22	22	22	22	22	22	22	22	22	AANSLEAFIFETQDK;AEAGPEGVAPAPEGEK;AHFNLDESGVLSLDR;DAVITVPVFFNQAER;DAVVYPILVEFTR;EAGMQPQLQIR;EVEEEPGIHSLK;EVQYLLNK;FFGDSAASMAIK;FPEHELTFDPQR;LAGLFNEQR;LGNTISSLFGGGTTPDAK;LIPEMDQIFTEVEMTTLEK;LPATEKPVLLSK;LQDLTLR;NINADEAAAMGAVYQAAALSK;SLAEDFAEQPIKDAVITVPVFFNQAER;TLGGLEMELR;TPVIVTLK;TVLSANADHMAQIEGLMDDVDFK;VAIVKPGVPMEIVLNK;VEFEELCADLFER;VESVFETLVEDSAEEESTLTK;VLQLINDNTATALSYGVFR;VQEVLLK;YFQHLLGK	tr|A0A087X054|A0A087X054_HUMAN Isoform of Q9Y4L1, Hypoxia up-regulated protein 1 OS=Homo sapiens OX=9606 GN=HYOU1 PE=1 SV=1;sp|Q9Y4L1|HYOU1_HUMAN Hypoxia up-regulated protein 1 OS=Homo sapiens OX=9606 GN=HYOU1 PE=1 SV=1;tr|E9PJ21|E9PJ21_HUMAN Isoform of Q9	136;350;659;2041;2047;3152;4253;4305;4606;4981;9024;9720;9902;10481;10608;12167;14367;15677;15900;16163;16336;16587;16656;17213;17504;18267	NaN;NaN;NaN;NaN;NaN;NaN;NaN;NaN;NaN;NaN;NaN;NaN;NaN;NaN;NaN;NaN;NaN;NaN;NaN;NaN;NaN;NaN;NaN;NaN;NaN;NaN
83	A0A087X091	A0A087X091		WDR13	NaN	NaN	NaN	1679900	NaN	NaN	1	1	1	1	1	1	1	7	7	7	20.602	1	-2	20159000	1679900	12	1	1	0	0	20159000	0	0	7	0	0	1	0	0	1	0	0	1	0	0	LQDTHSPRVGNAK	tr|A0A087X091|A0A087X091_HUMAN Isoform of Q9H1Z4, WD repeat-containing protein 13 (Fragment) OS=Homo sapiens OX=9606 GN=WDR13 PE=1 SV=1	10614	NaN
84	A0A087X0K9;G5E9E7;G3V1L9;Q07157-2;Q07157;H0YKB1;H0YLT6	A0A087X0K9;G5E9E7;G3V1L9;Q07157-2;Q07157	Tight junction protein ZO-1	TJP1	25993000	27725000	21911000	215450	141110	39935	NaN	NaN	NaN	7	8	8	8	7.4	7.4	7.4	187.85	0	21.894	119200000	396500	90	10	3	5	2	72005000	35932000	11263000	4.9	4.8	1.6	5	5	2	5	5	2	5	5	2	DGNIQEGDVVLK;DNPHFQSGETSIVISDVLK;EAGFLRPVTIFGPIADVAR;GGPAEGQLQENDR;HALLDVTPNAVDR;LAGGNDVGIFVAGVLEDSPAAK;LGSWLAIR;LNYAQWYPIVVFLNPDSK	tr|A0A087X0K9|A0A087X0K9_HUMAN Isoform of Q07157, Tight junction protein ZO-1 OS=Homo sapiens OX=9606 GN=TJP1 PE=1 SV=1;tr|G5E9E7|G5E9E7_HUMAN Isoform of Q07157, Tight junction protein 1 (Zona occludens 1), isoform CRA_e OS=Homo sapiens OX=9606 GN=TJP1 PE=	2278;2729;3150;5711;6567;9022;9752;10474	NaN;NaN;NaN;NaN;NaN;NaN;NaN;NaN
85	Q9H4L4;A0A087X0R7;J3QL36	Q9H4L4;A0A087X0R7;J3QL36	Sentrin-specific protease 3	SENP3;SENP3-EIF4A1	NaN	NaN	NaN	193810	110200	96388	NaN	NaN	NaN	3	2	2	2	4.7	4.7	4.7	65.009	0	4.4875	10856000	400400	21	2	0	1	1	4070000	4761500	2024100	2.4	4.7	2.4	1	2	1	1	2	1	1	2	1	KGLVLQLIQSYQR;LGLLGALMAEDGVR	sp|Q9H4L4|SENP3_HUMAN Sentrin-specific protease 3 OS=Homo sapiens OX=9606 GN=SENP3 PE=1 SV=2;tr|A0A087X0R7|A0A087X0R7_HUMAN SENP3-EIF4A1 readthrough (NMD candidate) (Fragment) OS=Homo sapiens OX=9606 GN=SENP3-EIF4A1 PE=4 SV=1;tr|J3QL36|J3QL36_HUMAN Isoform	8684;9702	NaN;NaN
86	A0A087X0S5;P12109	A0A087X0S5;P12109	Collagen alpha-1(VI) chain	COL6A1	NaN	NaN	NaN	141240	NaN	NaN	NaN	NaN	NaN	2	2	2	2	3.1	3.1	3.1	108.34	0.0012087	2.6727	7485500	141240	53	1	1	0	0	7485500	0	0	3.1	0	0	2	0	0	2	0	0	2	0	0	ENYAELLEDAFLK;LLLFSDGNSQGATPAAIEK	tr|A0A087X0S5|A0A087X0S5_HUMAN Isoform of P12109, Collagen alpha-1(VI) chain OS=Homo sapiens OX=9606 GN=COL6A1 PE=1 SV=1;sp|P12109|CO6A1_HUMAN Collagen alpha-1(VI) chain OS=Homo sapiens OX=9606 GN=COL6A1 PE=1 SV=3	3991;10180	NaN;NaN
87	Q2TAM5;E9PKH5;A0A087X0W8;Q04206-2;Q04206-4;Q04206;E9PI38;E9PQS6;E9PKV4;A0A087WVP0;Q04206-3;E9PJR1;E9PRX2;E9PNV4;E9PMD5	Q2TAM5;E9PKH5;A0A087X0W8;Q04206-2;Q04206-4;Q04206;E9PI38;E9PQS6;E9PKV4;A0A087WVP0;Q04206-3	Transcription factor p65	RELA	NaN	NaN	NaN	700390	411060	347070	NaN	NaN	NaN	15	3	3	3	10.6	10.6	10.6	42.868	0	8.2385	52300000	700390	23	4	2	1	1	34863000	9454500	7982500	10.6	3.4	3.4	3	1	1	3	1	1	3	1	1	DGFYEAELCPDR;EDIEVYFTGPGWEAR;LPPVLSHPIFDNR	tr|Q2TAM5|Q2TAM5_HUMAN Isoform of Q04206, RELA protein OS=Homo sapiens OX=9606 GN=RELA PE=1 SV=1;tr|E9PKH5|E9PKH5_HUMAN Isoform of Q04206, Transcription factor p65 (Fragment) OS=Homo sapiens OX=9606 GN=RELA PE=1 SV=1;tr|A0A087X0W8|A0A087X0W8_HUMAN Isoform	2253;3288;10554	NaN;NaN;NaN
88	A0A087X0W9;Q8N6M0-2;Q8N6M0	A0A087X0W9;Q8N6M0-2;Q8N6M0	OTU domain-containing protein 6B	OTUD6B	15716000	9945200	NaN	895390	433380	59659	NaN	NaN	NaN	3	2	2	2	12.7	12.7	12.7	37.325	0	12.147	24154000	1328800	14	5	2	2	1	16543000	6775800	835220	12.7	12.7	8.7	2	2	1	2	2	1	2	2	1	ALSHILQTPIEIIQADSPPIIVGEEYSK;IAEAEIENLTGAR	tr|A0A087X0W9|A0A087X0W9_HUMAN Isoform of Q8N6M0, Deubiquitinase OTUD6B OS=Homo sapiens OX=9606 GN=OTUD6B PE=1 SV=1;sp|Q8N6M0-2|OTU6B_HUMAN Isoform of Q8N6M0, Isoform 2 of Deubiquitinase OTUD6B OS=Homo sapiens OX=9606 GN=OTUD6B;sp|Q8N6M0|OTU6B_HUMAN Deubiq	1034;7019	NaN;NaN
89	H0YJE4;A0A087X0Z7;H0YJ66;Q9Y394-2;Q9Y394	H0YJE4;A0A087X0Z7;H0YJ66;Q9Y394-2;Q9Y394	Dehydrogenase/reductase SDR family member 7	DHRS7	NaN	NaN	NaN	1974700	1241700	1197000	NaN	NaN	NaN	5	1	1	1	12.5	12.5	12.5	17.851	0	5.0444	35307000	4413400	8	3	1	1	1	15798000	9933200	9576000	12.5	12.5	12.5	1	1	1	1	1	1	1	1	1	DILVLPLDLTDTGSHEAATK	tr|H0YJE4|H0YJE4_HUMAN Isoform of Q9Y394, Dehydrogenase/reductase SDR family member 7 (Fragment) OS=Homo sapiens OX=9606 GN=DHRS7 PE=1 SV=1;tr|A0A087X0Z7|A0A087X0Z7_HUMAN Isoform of Q9Y394, Dehydrogenase/reductase SDR family member 7 OS=Homo sapiens OX=960	2413	NaN
90	J3KN36;A0A0G2JN29;A0A087X117;Q5JPE7-2;Q15155;P69849;Q5JPE7;A0A0G2JP90;A0A087WW46;Q5JPE7-3;A0A087WTD5;H3BUC9	J3KN36;A0A0G2JN29;A0A087X117;Q5JPE7-2;Q15155;P69849;Q5JPE7;A0A0G2JP90;A0A087WW46;Q5JPE7-3	Nodal modulator 2;Nodal modulator 1;Nodal modulator 3	NOMO3;NOMO1;NOMO2	23420000	26505000	23799000	574600	568340	335530	NaN	NaN	NaN	12	9	9	9	9.7	9.7	9.7	139.38	0	18.541	130030000	1478500	67	15	6	4	5	63315000	41471000	25247000	5.8	5.9	4.3	5	6	4	5	6	4	5	6	4	AEDDQPLPGVLLSLSGGLFR;DGENYVVLLDSTLPR;EQQLAEIEAR;FLLFSSLVTK;GASSPLITVFTDDK;GQPLGPAGVQVSLR;ITITGYR;SSIDSEPALVLGPLK;VLPGDYEILATHPTWALK	tr|J3KN36|J3KN36_HUMAN Isoform of P69849, Nodal modulator 3 OS=Homo sapiens OX=9606 GN=NOMO3 PE=1 SV=1;tr|A0A0G2JN29|A0A0G2JN29_HUMAN Isoform of Q15155, Nodal modulator 1 OS=Homo sapiens OX=9606 GN=NOMO1 PE=1 SV=1;tr|A0A087X117|A0A087X117_HUMAN Isoform of	357;2247;4076;4863;5363;6239;8263;14804;17190	NaN;NaN;NaN;NaN;NaN;NaN;NaN;NaN;NaN
91	A0A087X142;A6NMH6;A6NFQ9;F8W8I8;Q92599-2;Q92599-4;Q92599	A0A087X142;A6NMH6;A6NFQ9;F8W8I8;Q92599-2;Q92599-4;Q92599	Septin-8	2008-09-01	NaN	NaN	NaN	825070	NaN	NaN	NaN	NaN	NaN	7	4	1	1	12.7	4.7	4.7	49.355	0.0015582	2.4605	15676000	825070	19	1	1	0	0	15676000	0	0	9.2	4.5	3.5	2	1	2	1	0	0	1	0	0	QYPWGVVQVENENHCDFVK;SLDLVTMK;SLSLGGHVGFDSLPDQLVSK;VNMEDLR	tr|A0A087X142|A0A087X142_HUMAN Isoform of Q92599, Septin-8 OS=Homo sapiens OX=9606 GN=SEPT8 PE=1 SV=1;tr|A6NMH6|A6NMH6_HUMAN Isoform of Q92599, Septin-8 OS=Homo sapiens OX=9606 GN=SEPT8 PE=1 SV=1;tr|A6NFQ9|A6NFQ9_HUMAN Isoform of Q92599, Septin-8 OS=Homo s	13398;14393;14528;17371	NaN;NaN;NaN;NaN
92	Q5W0J0;A0A087X163;Q9NP72-3;Q9NP72;Q9NP72-2;H0Y6T8	Q5W0J0;A0A087X163;Q9NP72-3;Q9NP72;Q9NP72-2;H0Y6T8	Ras-related protein Rab-18	RAB18	NaN	NaN	NaN	1596400	814740	1051200	NaN	NaN	NaN	6	2	2	2	15.5	15.5	15.5	18.023	0	7.3031	31161000	3462300	9	4	1	1	2	14368000	7332600	9460400	9.3	9.3	15.5	1	1	2	1	1	2	1	1	2	MDEDVLTTLK;TCDGVQCAFEELVEK	tr|Q5W0J0|Q5W0J0_HUMAN Isoform of Q9NP72, Ras-related protein Rab-18 OS=Homo sapiens OX=9606 GN=RAB18 PE=1 SV=1;tr|A0A087X163|A0A087X163_HUMAN Isoform of Q9NP72, Ras-related protein Rab-18 OS=Homo sapiens OX=9606 GN=RAB18 PE=1 SV=1;sp|Q9NP72-3|RAB18_HUMAN	11406;15170	NaN;NaN
93	A0A087X1A5;Q5JW30;O95793-2;O95793;O95793-3;Q5JW28	A0A087X1A5;Q5JW30;O95793-2;O95793;O95793-3;Q5JW28	Double-stranded RNA-binding protein Staufen homolog 1	STAU1	19841000	20901000	19453000	1772800	1261000	844440	NaN	NaN	NaN	6	6	6	6	12.8	12.8	12.8	54.945	0	15.889	115760000	3878300	29	12	3	4	5	51411000	36570000	27774000	7.9	12.6	12.8	3	5	5	3	5	5	3	5	5	ELLYGGTSPTAETILK;NAAENMLEILGFK;NAAIAVLEELK;NAAIAVLEELKK;NLPVNFEVAR;SEISQVFEIALK	tr|A0A087X1A5|A0A087X1A5_HUMAN Isoform of O95793, Double-stranded RNA-binding protein Staufen homolog 1 OS=Homo sapiens OX=9606 GN=STAU1 PE=1 SV=1;tr|Q5JW30|Q5JW30_HUMAN Isoform of O95793, Double-stranded RNA-binding protein Staufen homolog 1 OS=Homo sapie	3841;11843;11846;11847;12298;14010	NaN;NaN;NaN;NaN;NaN;NaN
94	A0A087X1B2;B9A018;Q53GS9-2;Q53GS9;Q53GS9-3	A0A087X1B2;B9A018;Q53GS9-2;Q53GS9;Q53GS9-3	U4/U6.U5 tri-snRNP-associated protein 2	USP39	NaN	NaN	NaN	91197	260660	141820	NaN	NaN	NaN	5	4	4	4	9.4	9.4	9.4	56.399	0	8.6638	12836000	402480	26	4	1	1	2	2371100	6777200	3687200	3.9	5.7	6.4	1	2	2	1	2	2	1	2	2	DEKEQLIIPQVPLFNILAK;EQLIIPQVPLFNILAK;NPTIVNFPITNVDLR;TIVTDVFQGSMR	tr|A0A087X1B2|A0A087X1B2_HUMAN Isoform of Q53GS9, U4/U6.U5 tri-snRNP-associated protein 2 OS=Homo sapiens OX=9606 GN=USP39 PE=1 SV=1;tr|B9A018|B9A018_HUMAN Isoform of Q53GS9, U4/U6.U5 tri-snRNP-associated protein 2 OS=Homo sapiens OX=9606 GN=USP39 PE=1 SV=	2130;4058;12429;15608	NaN;NaN;NaN;NaN
95	E7ENE7;A0A1B0GU72;A0A0G2JSD7;Q6NWU0;Q38LG0;C1ID54;A0A0U1RRC6;A0A0G2JNM9;A0A0G2JMD2;P10635;A0A087X1C5	E7ENE7;A0A1B0GU72;A0A0G2JSD7;Q6NWU0;Q38LG0;C1ID54;A0A0U1RRC6;A0A0G2JNM9;A0A0G2JMD2;P10635;A0A087X1C5	Cytochrome P450 2D6;Putative cytochrome P450 2D7	CYP2D6;CYP2D7	NaN	NaN	NaN	1868800	NaN	NaN	NaN	NaN	NaN	11	1	1	1	2.2	2.2	2.2	55.231	1	-2	54196000	1868800	29	1	1	0	0	54196000	0	0	2.2	0	0	1	0	0	1	0	0	1	0	0	EQRRFSVSTLR	tr|E7ENE7|E7ENE7_HUMAN Isoform of P10635, Cytochrome P450 2D6 OS=Homo sapiens OX=9606 GN=CYP2D6 PE=1 SV=3;tr|A0A1B0GU72|A0A1B0GU72_HUMAN Isoform of P10635, Cytochrome P450 2D6 OS=Homo sapiens OX=9606 GN=CYP2D6 PE=1 SV=1;tr|A0A0G2JSD7|A0A0G2JSD7_HUMAN Isofo	4078	NaN
96	A0A087X1K9;E5RGR0;O75608-2;O75608;E5RJ48;B4DP64	A0A087X1K9;E5RGR0;O75608-2;O75608	Acyl-protein thioesterase 1	LYPLA1	58097000	33917000	33127000	8935100	3126700	2681700	NaN	NaN	NaN	6	5	5	5	52.4	52.4	52.4	17.981	0	11.952	165300000	14743000	10	14	5	5	4	103200000	33755000	28348000	52.4	44.6	30.7	5	4	3	5	4	3	5	4	3	ASFPQGPIGGANR;DISILQCHGDCDPLVPLMFGSLTVEK;IILGGFSQGGALSLYTALTTQQK;LAGVTALSCWLPLR;TLVNPANVTFK	tr|A0A087X1K9|A0A087X1K9_HUMAN Isoform of O75608, Acyl-protein thioesterase 1 OS=Homo sapiens OX=9606 GN=LYPLA1 PE=1 SV=1;tr|E5RGR0|E5RGR0_HUMAN Isoform of O75608, Acyl-protein thioesterase 1 (Fragment) OS=Homo sapiens OX=9606 GN=LYPLA1 PE=1 SV=1;sp|O75608	1376;2435;7599;9029;15777	NaN;NaN;NaN;NaN;NaN
97	H0Y786;P20929-3;P20929-2;A0A087X1N7	H0Y786;P20929-3;P20929-2;A0A087X1N7		NEB	NaN	NaN	NaN	780950	NaN	369190	NaN	NaN	NaN	4	1	1	1	0.3	0.3	0.3	348.95	1	-2	218530000	1150100	190	2	1	0	1	148380000	0	70146000	0.3	0	0.3	1	0	1	1	0	1	1	0	1	INALQISNK	tr|H0Y786|H0Y786_HUMAN Isoform of P20929, Nebulin (Fragment) OS=Homo sapiens OX=9606 GN=NEB PE=1 SV=1;sp|P20929-3|NEBU_HUMAN Isoform of P20929, Isoform 3 of Nebulin OS=Homo sapiens OX=9606 GN=NEB;sp|P20929-2|NEBU_HUMAN Isoform of P20929, Isoform 2 of Nebul	7916	NaN
98	A0A087X1Z3;Q9UL46;H0YM70;H0YKU2	A0A087X1Z3;Q9UL46;H0YM70	Proteasome activator complex subunit 2	PSME2	NaN	NaN	NaN	971530	405500	NaN	NaN	NaN	NaN	4	5	5	5	26	26	26	29.126	0	7.871	33749000	1377000	15	5	2	3	0	24447000	9302100	0	15.7	15.4	0	3	3	0	3	3	0	3	3	0	AFYAELYHIISSNLEK;DEAAYGELR;QNLFQEAEEFLYR;VEAFQTTISK;VLSLLALVKPEVWTLKEK	tr|A0A087X1Z3|A0A087X1Z3_HUMAN Isoform of Q9UL46, Proteasome activator complex subunit 2 OS=Homo sapiens OX=9606 GN=PSME2 PE=1 SV=1;sp|Q9UL46|PSME2_HUMAN Proteasome activator complex subunit 2 OS=Homo sapiens OX=9606 GN=PSME2 PE=1 SV=4;tr|H0YM70|H0YM70_HUM	538;2117;13205;16559;17236	NaN;NaN;NaN;NaN;NaN
99	A0A087X256;Q2M389-2;Q2M389	A0A087X256;Q2M389-2;Q2M389	WASH complex subunit 7	KIAA1033	NaN	NaN	NaN	NaN	NaN	NaN	NaN	NaN	NaN	3	1	1	1	0.7	0.7	0.7	136.5	0.0068198	1.8644	0	0	65	2	0	1	1	0	0	0	0	0.7	0.7	0	1	1	0	1	1	0	1	1	LDLISELR	tr|A0A087X256|A0A087X256_HUMAN Isoform of Q2M389, WASH complex subunit 4 OS=Homo sapiens OX=9606 GN=WASHC4 PE=1 SV=1;sp|Q2M389-2|WASC4_HUMAN Isoform of Q2M389, Isoform 2 of WASH complex subunit 4 OS=Homo sapiens OX=9606 GN=WASHC4;sp|Q2M389|WASC4_HUMAN WASH	9252	NaN
100	A0A087X283;R4GN77;C9J2P0;H7C061;C9J180;B7Z306;R4GND1;A0A1B0GX65;P51965-2;P51965-3;P51965;Q96LR5;Q969T4	A0A087X283;R4GN77;C9J2P0;H7C061;C9J180;B7Z306;R4GND1;A0A1B0GX65;P51965-2;P51965-3;P51965;Q96LR5;Q969T4	Ubiquitin-conjugating enzyme E2 E1;Ubiquitin-conjugating enzyme E2 E2;Ubiquitin-conjugating enzyme E2 E3	UBE2E2;UBE2E3;UBE2E1	NaN	NaN	NaN	2911900	1209900	1110600	NaN	NaN	NaN	13	1	1	1	8.5	8.5	8.5	10.424	0.0029751	2.1763	26162000	5232400	5	3	1	1	1	14559000	6049500	5552900	8.5	8.5	8.5	1	1	1	1	1	1	1	1	1	GDNIYEWR	tr|A0A087X283|A0A087X283_HUMAN Isoform of Q96LR5, Ubiquitin-conjugating enzyme E2 E2 OS=Homo sapiens OX=9606 GN=UBE2E2 PE=3 SV=1;tr|R4GN77|R4GN77_HUMAN Isoform of Q969T4, Ubiquitin-conjugating enzyme E2 E3 (Fragment) OS=Homo sapiens OX=9606 GN=UBE2E3 PE=1	5450	NaN
101	A0A087X2D0;P84103-2;P84103	A0A087X2D0;P84103-2;P84103	Serine/arginine-rich splicing factor 3	SRSF3	220940000	222280000	233930000	39807000	20490000	20285000	NaN	NaN	NaN	3	4	3	3	44.2	44.2	44.2	10.32	0	12.18	701310000	80582000	7	9	3	3	3	359250000	170200000	171870000	44.2	44.2	44.2	4	4	4	3	3	3	3	3	3	AFGYYGPLR;NPPGFAFVEFEDPR;NPPGFAFVEFEDPRDAADAVR;VYVGNLGNNGNK	tr|A0A087X2D0|A0A087X2D0_HUMAN Isoform of P84103, Serine/arginine-rich-splicing factor 3 OS=Homo sapiens OX=9606 GN=SRSF3 PE=1 SV=1;sp|P84103-2|SRSF3_HUMAN Isoform of P84103, Isoform 2 of Serine/arginine-rich splicing factor 3 OS=Homo sapiens OX=9606 GN=SR	486;12424;12425;17969	NaN;NaN;NaN;NaN
102	A0A087X2D8;O60271-5;O60271-3;O60271-9;O60271-4;O60271-2;O60271;D6RHI8;H0YBE9;E9PFH7;A0A087WYG2;Q9UPT6	A0A087X2D8;O60271-5;O60271-3;O60271-9;O60271-4;O60271-2;O60271	C-Jun-amino-terminal kinase-interacting protein 4	SPAG9	11906000	13812000	12999000	196530	40183	47382	NaN	NaN	NaN	12	5	5	5	6	6	6	145.17	0	13.549	60431000	284100	66	9	4	2	3	34741000	11720000	13971000	5.3	4.1	4.8	4	3	4	4	3	4	4	3	4	AFDFLSEETEASLASR;ERPISLGIFPLPAGDGLLTPDAQK;EVENLILENTQLLETK;LMELQEAVR;NLPVPVYLRPLDEK	tr|A0A087X2D8|A0A087X2D8_HUMAN Isoform of O60271, C-Jun-amino-terminal kinase-interacting protein 4 OS=Homo sapiens OX=9606 GN=SPAG9 PE=1 SV=1;sp|O60271-5|JIP4_HUMAN Isoform of O60271, Isoform 5 of C-Jun-amino-terminal kinase-interacting protein 4 OS=Homo	463;4097;4257;10354;12299	NaN;NaN;NaN;NaN;NaN
103	A0A087X2H1;Q9ULT8;G3V4V5;H0YJD4;H0YJP0;A0A087WVU6	A0A087X2H1;Q9ULT8;G3V4V5	E3 ubiquitin-protein ligase HECTD1	HECTD1	12281000	7516000	9526200	246890	7028.5	82182	NaN	NaN	NaN	6	10	10	10	5.9	5.9	5.9	289.63	0	23.546	63553000	336100	125	13	6	1	6	42149000	2594100	18810000	2.8	1.3	3.8	5	2	6	5	2	6	5	2	6	AGNGQNSCGVEDVLQLLR;CPFLIPFETR;EDLPGFVFESNR;HGLTEELLSR;IFLDESAPDNVLEVTAR;ILQQIEEPLALASGALPDWCEQLTSK;LSNQVSTIVSLLSTLCR;LSVSSLLAAGAPMSSSASVPNLSSR;LVDLPISKPFFK;VLELICTR	tr|A0A087X2H1|A0A087X2H1_HUMAN Isoform of Q9ULT8, E3 ubiquitin-protein ligase HECTD1 OS=Homo sapiens OX=9606 GN=HECTD1 PE=1 SV=1;sp|Q9ULT8|HECD1_HUMAN E3 ubiquitin-protein ligase HECTD1 OS=Homo sapiens OX=9606 GN=HECTD1 PE=1 SV=3;tr|G3V4V5|G3V4V5_HUMAN Iso	602;1890;3300;6693;7351;7838;10864;10915;11095;17088	NaN;NaN;NaN;NaN;NaN;NaN;NaN;NaN;NaN;NaN
104	A0A087X2I1;P62333;H0YJC0;H0YJS8;H0YJE9;H0YJT1;H0YJX2	A0A087X2I1;P62333;H0YJC0	26S protease regulatory subunit 10B	PSMC6	61835000	53598000	49217000	13115000	3790600	3763500	NaN	NaN	NaN	7	12	12	12	36.2	36.2	36.2	45.796	0	58.96	587230000	20669000	23	36	13	11	12	372960000	109250000	105020000	31	23.8	27	10	7	8	10	7	8	10	7	8	ADHDFVVQEDFMK;ALQSVGQIVGEVLK;ALQSVGQIVGEVLKQLTEEK;AVASQLDCNFLK;DHQPCIIFMDEIDAIGGR;EVIELPLTNPELFQR;HGEIDYEAIVK;IHAGPITK;LSDGFNGADLR;NVCTEAGMFAIR;TLMELLNQMDGFDTLHR;VVSSSIVDK	tr|A0A087X2I1|A0A087X2I1_HUMAN Isoform of P62333, 26S proteasome regulatory subunit 10B OS=Homo sapiens OX=9606 GN=PSMC6 PE=1 SV=1;sp|P62333|PRS10_HUMAN 26S proteasome regulatory subunit 10B OS=Homo sapiens OX=9606 GN=PSMC6 PE=1 SV=1;tr|H0YJC0|H0YJC0_HUMAN	276;1026;1027;1551;2347;4271;6676;7503;10788;12559;15715;17885	NaN;NaN;NaN;NaN;NaN;NaN;NaN;NaN;NaN;NaN;NaN;NaN
105	A0A087X2I5;Q9UK45	A0A087X2I5;Q9UK45	U6 snRNA-associated Sm-like protein LSm7	LSM7	NaN	NaN	NaN	NaN	3726200	NaN	NaN	NaN	NaN	2	1	1	1	16.3	16.3	16.3	5.5062	0.0068296	1.8722	11179000	3726200	3	1	0	1	0	0	11179000	0	0	16.3	0	0	1	0	0	1	0	0	1	0	QLGLVVCR	tr|A0A087X2I5|A0A087X2I5_HUMAN Isoform of Q9UK45, U6 snRNA-associated Sm-like protein LSm7 OS=Homo sapiens OX=9606 GN=LSM7 PE=1 SV=1;sp|Q9UK45|LSM7_HUMAN U6 snRNA-associated Sm-like protein LSm7 OS=Homo sapiens OX=9606 GN=LSM7 PE=1 SV=1	13115	NaN
106	A0A096LNY5;A0A1B0GTG9;A0A1B0GWF8;A0A1B0GWJ0;A0A1B0GTJ7;A0A0A6YY92;P30566-2;P30566;B4DEP1;A0A096LP72;A0A096LNY4;A0A096LP92;A0A096LPA2;A0A1W2PRX2;A0A096LNY6	A0A096LNY5;A0A1B0GTG9;A0A1B0GWF8;A0A1B0GWJ0;A0A1B0GTJ7;A0A0A6YY92;P30566-2;P30566;B4DEP1;A0A096LP72;A0A096LNY4	Adenylosuccinate lyase	ADSL	23517000	21925000	23610000	2956900	852640	808840	NaN	NaN	NaN	15	5	5	5	27.9	27.9	27.9	29.571	0	31.282	101590000	4618400	12	11	5	3	3	59450000	22096000	20044000	27.9	15.6	15.6	5	3	3	5	3	3	5	3	3	AAGGDHGSPDSYR;GTTGTQASFLQLFEGDDHK;KVDIEVLSVLASLGASVHK;SNLENIDFK;YASPEMCFVFSDR	tr|A0A096LNY5|A0A096LNY5_HUMAN Isoform of P30566, Adenylosuccinate lyase (Fragment) OS=Homo sapiens OX=9606 GN=ADSL PE=1 SV=1;tr|A0A1B0GTG9|A0A1B0GTG9_HUMAN Isoform of P30566, Adenylosuccinate lyase (Fragment) OS=Homo sapiens OX=9606 GN=ADSL PE=1 SV=1;tr|A	76;6374;8912;14610;18129	NaN;NaN;NaN;NaN;NaN
107	C9JFE4;A0A096LP07;A0A096LPJ3;A8K070;Q13098-5;Q13098;Q13098-7;Q13098-6	C9JFE4;A0A096LP07;A0A096LPJ3;A8K070;Q13098-5;Q13098;Q13098-7;Q13098-6	COP9 signalosome complex subunit 1	GPS1	NaN	NaN	NaN	412950	NaN	NaN	NaN	NaN	NaN	8	1	1	1	2.1	2.1	2.1	53.371	0.00042212	3.0187	7433100	412950	18	1	1	0	0	7433100	0	0	2.1	0	0	1	0	0	1	0	0	1	0	0	LFLELEPQVR	tr|C9JFE4|C9JFE4_HUMAN Isoform of Q13098, COP9 signalosome complex subunit 1 OS=Homo sapiens OX=9606 GN=GPS1 PE=1 SV=2;tr|A0A096LP07|A0A096LP07_HUMAN Isoform of Q13098, COP9 signalosome complex subunit 1 OS=Homo sapiens OX=9606 GN=GPS1 PE=1 SV=1;tr|A0A096L	9528	NaN
108	A0A0G2JQ95;A0A096LP11;A0A140TA76;Q8ND56-3;Q8ND56-2;Q8ND56	A0A0G2JQ95;A0A096LP11;A0A140TA76;Q8ND56-3;Q8ND56-2;Q8ND56	Protein LSM14 homolog A	LSM14A	NaN	NaN	NaN	1410900	724410	692190	NaN	NaN	NaN	6	1	1	1	8.3	8.3	8.3	15.911	0.00043178	3.2088	22620000	2827500	8	3	1	1	1	11287000	5795300	5537500	8.3	8.3	8.3	1	1	1	1	1	1	1	1	1	SFFDNISCDDNR	tr|A0A0G2JQ95|A0A0G2JQ95_HUMAN Isoform of Q8ND56, Protein LSM14 homolog A (Fragment) OS=Homo sapiens OX=9606 GN=LSM14A PE=1 SV=1;tr|A0A096LP11|A0A096LP11_HUMAN Isoform of Q8ND56, Protein LSM14 homolog A (Fragment) OS=Homo sapiens OX=9606 GN=LSM14A PE=1 SV=	14073	NaN
109	A0A096LP25;Q6ZSR9	A0A096LP25;Q6ZSR9	Uncharacterized protein FLJ45252	AAK1	NaN	NaN	NaN	NaN	92747	100680	NaN	NaN	NaN	2	1	1	1	3.5	3.5	3.5	54.448	0.001222	2.7568	3675200	193430	19	2	0	1	1	0	1762200	1913000	0	3.5	3.5	0	1	1	0	1	1	0	1	1	TTELPAADPFALAPFPSK	tr|A0A096LP25|A0A096LP25_HUMAN Isoform of Q2M2I8, AP2-associated protein kinase 1 (Fragment) OS=Homo sapiens OX=9606 GN=AAK1 PE=1 SV=1;sp|Q6ZSR9|YJ005_HUMAN Uncharacterized protein FLJ45252 OS=Homo sapiens OX=9606 PE=2 SV=2	16034	NaN
110	A0A096LPD9;E7EWK1;A0A182DWF2;D3YTF8;A0A182DWF3;Q9NNW7-2;Q9NNW7	A0A096LPD9;E7EWK1;A0A182DWF2;D3YTF8;A0A182DWF3;Q9NNW7-2;Q9NNW7	Thioredoxin reductase 2, mitochondrial	TXNRD2	NaN	NaN	NaN	NaN	483200	446990	NaN	NaN	NaN	7	2	1	1	9.8	4.9	4.9	33.167	0.00047214	3.9699	12092000	930190	13	2	0	1	1	0	6281600	5810900	4.9	9.8	9.8	1	2	2	0	1	1	0	1	1	VAVVDYVEPSPQGTR;WGLGGTCVNVGCIPK	tr|A0A096LPD9|A0A096LPD9_HUMAN Isoform of Q9NNW7, Thioredoxin reductase 2, mitochondrial OS=Homo sapiens OX=9606 GN=TXNRD2 PE=1 SV=1;tr|E7EWK1|E7EWK1_HUMAN Isoform of Q9NNW7, Thioredoxin reductase 2, mitochondrial OS=Homo sapiens OX=9606 GN=TXNRD2 PE=1 SV=	16407;18012	NaN;NaN
111	A0A096LPI6;P0DPI2;A0A0B4J2D5;A0A096LNH5;P0DPI2-2;A0A0B4J2H4;A0A0B4J2D5-2;A0A096LNJ1;A0A096LP73;A0A2R8Y6K9;H7C1F6;A0A2R8YDR7;H7C2G3;F2Z2Q0;A0A096LP12	A0A096LPI6;P0DPI2;A0A0B4J2D5;A0A096LNH5;P0DPI2-2;A0A0B4J2H4;A0A0B4J2D5-2			41470000	42698000	34741000	193910	1450300	1515500	NaN	NaN	NaN	15	5	5	4	38	38	33.3	30.376	0	13.352	135830000	193910	18	11	4	3	4	69332000	33327000	33176000	30.1	24.4	24.4	4	3	3	4	3	3	3	3	3	AGTLLPVIQFLQK;EFHQAGKPIGLCCIAPVLAAK;GGAEVQIFAPDVPQMHVIDHTK;ITDLANLSAANHDAAIFPGGFGAAK;VVTTPAFMCETALHYIHDGIGAMVR	tr|A0A096LPI6|A0A096LPI6_HUMAN Uncharacterized protein (Fragment) OS=Homo sapiens OX=9606 PE=4 SV=2;sp|P0DPI2|GAL3A_HUMAN Glutamine amidotransferase-like class 1 domain-containing protein 3A, mitochondrial OS=Homo sapiens OX=9606 GN=GATD3A PE=1 SV=1;sp|A0A	625;3430;5665;8234;17893	NaN;NaN;NaN;NaN;NaN
112	A2A2L6;A2A2L5;A0A0A0MQR2;Q9BY42	A2A2L6;A2A2L5;A0A0A0MQR2;Q9BY42	Protein RTF2 homolog	RTFDC1	NaN	NaN	NaN	616920	258170	265080	NaN	NaN	NaN	4	1	1	1	4.3	4.3	4.3	26.074	0.0015408	2.4004	11402000	1140200	10	3	1	1	1	6169200	2581700	2650800	4.3	4.3	4.3	1	1	1	1	1	1	1	1	1	DAVIEFLLDK	tr|A2A2L6|A2A2L6_HUMAN Isoform of Q9BY42, Replication termination factor 2 OS=Homo sapiens OX=9606 GN=RTF2 PE=1 SV=1;tr|A2A2L5|A2A2L5_HUMAN Isoform of Q9BY42, Replication termination factor 2 (Fragment) OS=Homo sapiens OX=9606 GN=RTF2 PE=1 SV=1;tr|A0A0A0MQ	2040	NaN
113	A0A0A0MQS1;Q53H96;B5MD87;Q53H96-2	A0A0A0MQS1;Q53H96;B5MD87;Q53H96-2	Pyrroline-5-carboxylate reductase;Pyrroline-5-carboxylate reductase 3	PYCRL	NaN	NaN	NaN	NaN	530770	88014	NaN	NaN	NaN	4	2	2	2	14.3	14.3	14.3	29.892	0.00047461	4.0242	8663000	618780	14	2	0	1	1	0	7430800	1232200	0	8	6.3	0	1	1	0	1	1	0	1	1	SDVCTPGGTTIYGLHALEQGGLR;VLPNLPCVVQEGAIVMAR	tr|A0A0A0MQS1|A0A0A0MQS1_HUMAN Isoform of Q53H96, Pyrroline-5-carboxylate reductase OS=Homo sapiens OX=9606 GN=PYCR3 PE=1 SV=1;sp|Q53H96|P5CR3_HUMAN Pyrroline-5-carboxylate reductase 3 OS=Homo sapiens OX=9606 GN=PYCR3 PE=1 SV=3;tr|B5MD87|B5MD87_HUMAN Isofo	13960;17194	NaN;NaN
114	U3KQC1;A0A0A0MQU0;Q9BV38;K7EIR0;A0A087X237;K7EKX5;K7EML4	U3KQC1;A0A0A0MQU0;Q9BV38;K7EIR0	WD repeat-containing protein 18	WDR18	NaN	NaN	NaN	842420	NaN	646890	NaN	NaN	NaN	7	3	3	3	8.4	8.4	8.4	43.237	0	5.5196	29786000	1489300	20	3	1	0	2	16848000	0	12938000	5.8	0	4.6	2	0	2	2	0	2	2	0	2	DLFDFSTR;LGLHQQGSEPSYLDR;NYISAWELQR	tr|U3KQC1|U3KQC1_HUMAN Isoform of Q9BV38, WD repeat-containing protein 18 (Fragment) OS=Homo sapiens OX=9606 GN=WDR18 PE=1 SV=1;tr|A0A0A0MQU0|A0A0A0MQU0_HUMAN Isoform of Q9BV38, WD repeat-containing protein 18 (Fragment) OS=Homo sapiens OX=9606 GN=WDR18 PE	2537;9697;12666	NaN;NaN;NaN
115	A0A0A0MQW0;A0A0A0MR39;Q9P2K5-2;Q9P2K5;H0YN19;A0A087WUT0;H0YKS1;A0A087WWC8;A0A0C4DGV1;Q9P2K5-4;Q9P2K5-3	A0A0A0MQW0;A0A0A0MR39;Q9P2K5-2;Q9P2K5;H0YN19;A0A087WUT0	Myelin expression factor 2	MYEF2	NaN	NaN	NaN	170620	328040	60251	NaN	NaN	NaN	11	3	3	3	5	5	5	61.957	0	5.6316	14532000	558910	26	4	2	1	1	4436000	8529100	1566500	3.1	3.6	1.7	2	2	1	2	2	1	2	2	1	MGPGIGAILER;REPHPAEAEK;SVPHEEYR	tr|A0A0A0MQW0|A0A0A0MQW0_HUMAN Isoform of Q9P2K5, Myelin expression factor 2, isoform CRA_b OS=Homo sapiens OX=9606 GN=MYEF2 PE=1 SV=1;tr|A0A0A0MR39|A0A0A0MR39_HUMAN Isoform of Q9P2K5, Myelin expression factor 2, isoform CRA_a OS=Homo sapiens OX=9606 GN=MY	11545;13477;14987	NaN;NaN;NaN
116	Q9NR56;Q9NR56-3;C9JP00;A0A0A0MQX8;Q9NR56-7;Q9NR56-6;Q9NR56-4;Q9NR56-2;Q9NR56-5;Q5VZF2-3;H7C4T5;Q5VZF2-2;Q5VZF2;O95205;Q9NUK0;Q9NUK0-2;B1AKI6	Q9NR56;Q9NR56-3;C9JP00;A0A0A0MQX8;Q9NR56-7;Q9NR56-6;Q9NR56-4;Q9NR56-2;Q9NR56-5;Q5VZF2-3;H7C4T5;Q5VZF2-2;Q5VZF2;O95205	Muscleblind-like protein 1;Muscleblind-like protein 2	MBNL1;MBNL2;MBLL	NaN	NaN	NaN	8549700	1851000	1623800	NaN	NaN	NaN	17	4	4	4	7.2	7.2	7.2	41.817	0	8.3363	132270000	12024000	11	6	4	1	1	94046000	20361000	17861000	7.2	2.3	2.3	4	1	1	4	1	1	4	1	1	AVSVTPIR;AVSVTPIRDTK;VIACFDSLK;WLTLEVCR	sp|Q9NR56|MBNL1_HUMAN Muscleblind-like protein 1 OS=Homo sapiens OX=9606 GN=MBNL1 PE=1 SV=2;sp|Q9NR56-3|MBNL1_HUMAN Isoform of Q9NR56, Isoform 3 of Muscleblind-like protein 1 OS=Homo sapiens OX=9606 GN=MBNL1;tr|C9JP00|C9JP00_HUMAN Isoform of Q9NR56, Muscle	1664;1665;16901;18038	NaN;NaN;NaN;NaN
117	A0A0A0MR02;P45880-2;P45880;P45880-1;Q5JSD2;Q5JSD1;A2A3S1	A0A0A0MR02;P45880-2;P45880;P45880-1;Q5JSD2;Q5JSD1	Voltage-dependent anion-selective channel protein 2	VDAC2	378410000	366140000	385950000	98124000	46071000	45834000	NaN	NaN	NaN	7	11	11	11	59.2	59.2	59.2	30.348	0	253.25	3481400000	190030000	14	47	17	15	15	1843900000	814320000	823110000	59.2	59.2	51.8	11	11	10	11	11	10	11	11	10	GFGFGLVK;LTFDTTFSPNTGK;LTLSALVDGK;NNFAVGYR;SCSGVEFSTSGSSNTDTGK;TGDFQLHTNVNDGTEFGGSIYQK;VCEDLDTSVNLAWTSGTNCTR;VNNSSLIGVGYTQTLRPGVK;WCEYGLTFTEK;WNTDNTLGTEIAIEDQICQGLK;YQLDPTASISAK	tr|A0A0A0MR02|A0A0A0MR02_HUMAN Isoform of P45880, Voltage-dependent anion-selective channel protein 2 (Fragment) OS=Homo sapiens OX=9606 GN=VDAC2 PE=1 SV=1;sp|P45880-2|VDAC2_HUMAN Isoform of P45880, Isoform 2 of Voltage-dependent anion-selective channel pr	5597;10963;11000;12369;13892;15406;16419;17375;17983;18044;18553	NaN;NaN;NaN;NaN;NaN;NaN;NaN;NaN;NaN;NaN;NaN
118	A0A0A0MR50;Q13619-2;Q13619;A6NE76;K4DI93;Q13620-3;Q13620-1;Q13620;A0A087WWN2	A0A0A0MR50;Q13619-2;Q13619;A6NE76;K4DI93;Q13620-3;Q13620-1;Q13620	Cullin-4A;Cullin-4B	CUL4A;CUL4B	NaN	NaN	NaN	238730	72021	NaN	NaN	NaN	NaN	9	3	3	3	4.8	4.8	4.8	77.719	0	5.5333	12741000	310750	41	2	1	1	0	9788100	2952900	0	2.8	3.6	0	2	2	0	2	2	0	2	2	0	SIFLFLDR;SLLGMLSDLQVYK;TIDGILLLIER	tr|A0A0A0MR50|A0A0A0MR50_HUMAN Isoform of Q13619, Cullin-4A OS=Homo sapiens OX=9606 GN=CUL4A PE=1 SV=1;sp|Q13619-2|CUL4A_HUMAN Isoform of Q13619, Isoform 2 of Cullin-4A OS=Homo sapiens OX=9606 GN=CUL4A;sp|Q13619|CUL4A_HUMAN Cullin-4A OS=Homo sapiens OX=960	14255;14476;15527	NaN;NaN;NaN
119	B9ZVX7;A0A0A0MR85;P09488-2;Q03013-2;Q03013;P09488;H3BQT3;E7EWW9;Q03013-3;H3BRM6	B9ZVX7;A0A0A0MR85;P09488-2;Q03013-2;Q03013;P09488;H3BQT3;E7EWW9;Q03013-3	Glutathione S-transferase Mu 1;Glutathione S-transferase Mu 4	GSTM1;GSTM4	17956000	14652000	13662000	1810000	683260	578440	NaN	NaN	NaN	10	3	2	0	24.8	20.1	0	17.39	0	8.3736	53404000	3071700	10	4	1	2	1	33347000	11289000	8768700	24.8	24.8	24.8	3	3	3	2	2	2	0	0	0	GLAHAIR;LGLDFPNLPYLIDGAHK;LLLEYTDSSYEEK	tr|B9ZVX7|B9ZVX7_HUMAN Isoform of P09488, Glutathione S-transferase Mu 1 OS=Homo sapiens OX=9606 GN=GSTM1 PE=1 SV=1;tr|A0A0A0MR85|A0A0A0MR85_HUMAN Isoform of Q03013, Glutathione S-transferase Mu 4 OS=Homo sapiens OX=9606 GN=GSTM4 PE=1 SV=1;sp|P09488-2|GSTM	5893;9686;10178	NaN;NaN;NaN
120	A0A0A0MRA5;B7Z4B8;Q9BUJ2-3;Q9BUJ2-4;Q9BUJ2-2;Q9BUJ2;M0QYZ0;M0R3F1;M0R203;M0QZV6;M0R0K8	A0A0A0MRA5;B7Z4B8;Q9BUJ2-3;Q9BUJ2-4;Q9BUJ2-2;Q9BUJ2;M0QYZ0;M0R3F1	Heterogeneous nuclear ribonucleoprotein U-like protein 1	HNRNPUL1	32691000	35493000	31593000	1632100	1027500	501360	NaN	NaN	NaN	11	6	6	6	11.6	11.6	11.6	85.939	0	26.004	221010000	3160900	33	17	6	7	4	120300000	69350000	31359000	7.6	11.6	8.7	4	6	4	4	6	4	4	6	4	AECEILMMVGLPAAGK;AEPYCSVLPGFTFIQHLPLSER;AIVICPTDEDLKDR;EALGGQALYPHVLVK;NCAVEFNFGQR;QNQFYDTQVIK	tr|A0A0A0MRA5|A0A0A0MRA5_HUMAN Isoform of Q9BUJ2, Heterogeneous nuclear ribonucleoprotein U-like protein 1 OS=Homo sapiens OX=9606 GN=HNRNPUL1 PE=1 SV=1;tr|B7Z4B8|B7Z4B8_HUMAN Isoform of Q9BUJ2, cDNA FLJ56481, highly similar to Heterogeneous nuclear ribonu	355;429;801;3182;11908;13209	NaN;NaN;NaN;NaN;NaN;NaN
121	P49406;A0A0A0MRF4;S4R3W9	P49406;A0A0A0MRF4;S4R3W9	39S ribosomal protein L19, mitochondrial	MRPL19	24035000	25696000	22589000	1179300	1055800	593940	NaN	NaN	NaN	3	3	3	3	11	11	11	33.535	0	9.3351	77494000	2829100	18	7	2	3	2	36384000	25457000	15652000	7.9	11	7.9	2	3	2	2	3	2	2	3	2	FLSPEFIPR;GLGATFILR;VLHIPEFYVGSILR	sp|P49406|RM19_HUMAN 39S ribosomal protein L19, mitochondrial OS=Homo sapiens OX=9606 GN=MRPL19 PE=1 SV=2;tr|A0A0A0MRF4|A0A0A0MRF4_HUMAN Isoform of P49406, 39S ribosomal protein L19, mitochondrial OS=Homo sapiens OX=9606 GN=MRPL19 PE=1 SV=1;tr|S4R3W9|S4R3W	4899;5950;17134	NaN;NaN;NaN
122	K7ERN7;A0A0A0MRH0;Q9NVX2	K7ERN7;A0A0A0MRH0;Q9NVX2	Notchless protein homolog 1	NLE1	NaN	NaN	NaN	558150	NaN	NaN	NaN	NaN	NaN	3	1	1	1	10.2	10.2	10.2	13.717	0.0026266	2.2473	2790800	558150	5	0	0	0	0	2790800	0	0	10.2	0	0	1	0	0	1	0	0	1	0	0	VLDIIYQPQAIFR	tr|K7ERN7|K7ERN7_HUMAN Isoform of Q9NVX2, Notchless protein homolog 1 OS=Homo sapiens OX=9606 GN=NLE1 PE=1 SV=1;tr|A0A0A0MRH0|A0A0A0MRH0_HUMAN Isoform of Q9NVX2, Notchless protein homolog 1 OS=Homo sapiens OX=9606 GN=NLE1 PE=1 SV=1;sp|Q9NVX2|NLE1_HUMAN Not	17061	NaN
123	A0A0A0MRI2;Q9UNH7-2;Q9UNH7;G3V5X9;Q86XE0-2;Q86XE0	A0A0A0MRI2;Q9UNH7-2;Q9UNH7	Sorting nexin-6;Sorting nexin-6, N-terminally processed	SNX6	50957000	53122000	42499000	4954000	1464100	1627100	NaN	NaN	NaN	6	7	7	7	21.5	21.5	21.5	47.804	0	26.228	195730000	8045300	23	12	5	2	5	113940000	33675000	48117000	15.8	5.5	15.6	5	2	5	5	2	5	5	2	5	DVLQAETSQQLCCQK;GNLQLLQNCLAVLNGDT;IGSSLYALGTQDSTDICK;NLVELAELELK;QELEAEYLAIFK;TFLLEYHNR;VAAHPILR	tr|A0A0A0MRI2|A0A0A0MRI2_HUMAN Isoform of Q9UNH7, Sorting nexin OS=Homo sapiens OX=9606 GN=SNX6 PE=1 SV=1;sp|Q9UNH7-2|SNX6_HUMAN Isoform of Q9UNH7, Isoform 2 of Sorting nexin-6 OS=Homo sapiens OX=9606 GN=SNX6;sp|Q9UNH7|SNX6_HUMAN Sorting nexin-6 OS=Homo sa	2990;6110;7481;12326;12922;15354;16271	NaN;NaN;NaN;NaN;NaN;NaN;NaN
124	A0A0A0MRI8;A6NGQ3;Q5VST9-5;Q5VST9-3;Q5VST9;Q5VST9-2;Q5VST9-6	A0A0A0MRI8;A6NGQ3;Q5VST9-5;Q5VST9-3;Q5VST9;Q5VST9-2;Q5VST9-6	Obscurin	OBSCN	NaN	NaN	NaN	131940	NaN	NaN	NaN	NaN	NaN	7	1	1	1	1.6	1.6	1.6	94.691	1	-2	5541700	131940	42	1	1	0	0	5541700	0	0	1.6	0	0	1	0	0	1	0	0	1	0	0	MSLEGQMAELRILR	tr|A0A0A0MRI8|A0A0A0MRI8_HUMAN Isoform of Q5VST9, Obscurin (Fragment) OS=Homo sapiens OX=9606 GN=OBSCN PE=1 SV=1;tr|A6NGQ3|A6NGQ3_HUMAN Isoform of Q5VST9, Obscurin OS=Homo sapiens OX=9606 GN=OBSCN PE=1 SV=5;sp|Q5VST9-5|OBSCN_HUMAN Isoform of Q5VST9, Isofor	11743	NaN
125	F6S8N6;A0A0A0MRJ6;H7BY58;P22061;P22061-2;F8WDT3;F8WAV5;F8WAX2;H7C4X2	F6S8N6;A0A0A0MRJ6;H7BY58;P22061;P22061-2	Protein-L-isoaspartate O-methyltransferase;Protein-L-isoaspartate(D-aspartate) O-methyltransferase	PCMT1	23317000	16402000	18160000	2454600	1412000	600020	NaN	NaN	NaN	9	6	6	6	40.4	40.4	40.4	26.626	0	26.63	94153000	4466600	14	11	5	4	2	59311000	24255000	10587000	28.8	36.8	21.2	4	5	2	4	5	2	4	5	2	LILPVGPAGGNQMLEQYDK;MGYAEEAPYDAIHVGAAAPVVPQALIDQLKPGGR;MKPLMGVIYVPLTDK;SGGASHSELIHNLR;VFEVMLATDR;VQLVVGDGR	tr|F6S8N6|F6S8N6_HUMAN Isoform of P22061, Protein-L-isoaspartate(D-aspartate) O-methyltransferase OS=Homo sapiens OX=9606 GN=PCMT1 PE=1 SV=1;tr|A0A0A0MRJ6|A0A0A0MRJ6_HUMAN Isoform of P22061, Protein-L-isoaspartate O-methyltransferase OS=Homo sapiens OX=960	9892;11554;11589;14141;16702;17520	NaN;NaN;NaN;NaN;NaN;NaN
126	A0A0A0MRM8;A0A0D9SGC1;E7EW20;Q9UM54-5;Q9UM54-2;Q9UM54-6;Q9UM54-4;Q9UM54-1;Q9UM54	A0A0A0MRM8;A0A0D9SGC1;E7EW20;Q9UM54-5;Q9UM54-2;Q9UM54-6;Q9UM54-4;Q9UM54-1;Q9UM54	Unconventional myosin-VI	MYO6	NaN	NaN	NaN	48838	12756	10119	NaN	NaN	NaN	9	1	1	1	1.4	1.4	1.4	145.01	0	7.0683	4302800	71713	60	3	1	1	1	2930300	765340	607170	1.4	1.4	1.4	1	1	1	1	1	1	1	1	1	TFLALINQVFPAEEDSK	tr|A0A0A0MRM8|A0A0A0MRM8_HUMAN Isoform of Q9UM54, Unconventional myosin-VI OS=Homo sapiens OX=9606 GN=MYO6 PE=1 SV=1;tr|A0A0D9SGC1|A0A0D9SGC1_HUMAN Isoform of Q9UM54, Unconventional myosin-VI OS=Homo sapiens OX=9606 GN=MYO6 PE=1 SV=1;tr|E7EW20|E7EW20_HUMAN	15351	NaN
127	A0A0A0MRN9;Q9GZV1;Q5T457;Q9GZV1-2	A0A0A0MRN9;Q9GZV1;Q5T457;Q9GZV1-2	Ankyrin repeat domain-containing protein 2	ANKRD2	NaN	NaN	NaN	416530	35206	NaN	NaN	NaN	NaN	4	2	2	2	7.8	7.8	7.8	37.121	0	5.9929	9034600	451730	20	2	1	1	0	8330500	704110	0	7.8	4.5	0	2	1	0	2	1	0	2	1	0	EIIDVGGIQNLIELR;LLSTPLHVAVR	tr|A0A0A0MRN9|A0A0A0MRN9_HUMAN Isoform of Q9GZV1, Ankyrin repeat domain-containing protein 2 OS=Homo sapiens OX=9606 GN=ANKRD2 PE=1 SV=1;sp|Q9GZV1|ANKR2_HUMAN Ankyrin repeat domain-containing protein 2 OS=Homo sapiens OX=9606 GN=ANKRD2 PE=1 SV=3;tr|Q5T457|	3638;10293	NaN;NaN
128	A0A0A0MRR7;P09234	A0A0A0MRR7;P09234	U1 small nuclear ribonucleoprotein C	SNRPC	NaN	NaN	NaN	5116600	2690400	2402700	NaN	NaN	NaN	2	1	1	1	10	10	10	19.687	0	5.1921	81677000	10210000	8	3	1	1	1	40933000	21523000	19221000	10	10	10	1	1	1	1	1	1	1	1	1	FYCDYCDTYLTHDSPSVR	tr|A0A0A0MRR7|A0A0A0MRR7_HUMAN Isoform of P09234, U1 small nuclear ribonucleoprotein C OS=Homo sapiens OX=9606 GN=SNRPC PE=1 SV=1;sp|P09234|RU1C_HUMAN U1 small nuclear ribonucleoprotein C OS=Homo sapiens OX=9606 GN=SNRPC PE=1 SV=1	5269	NaN
129	B6VEX4;A0A0A0MRT6;Q8IZP0-11;Q8IZP0-10;Q8IZP0-8;Q8IZP0-7;Q8IZP0-2;Q8IZP0-4;Q8IZP0-3;Q8IZP0-5;Q8IZP0-6;Q8IZP0-9;Q8IZP0-12;Q8IZP0	B6VEX4;A0A0A0MRT6;Q8IZP0-11;Q8IZP0-10;Q8IZP0-8;Q8IZP0-7;Q8IZP0-2;Q8IZP0-4;Q8IZP0-3;Q8IZP0-5;Q8IZP0-6;Q8IZP0-9;Q8IZP0-12;Q8IZP0	Abl interactor 1	ABI1	NaN	NaN	NaN	168260	31665	37679	NaN	NaN	NaN	14	1	1	1	3.8	3.8	3.8	43.294	0.00042992	3.1709	4276900	237600	18	3	1	1	1	3028700	569970	678230	3.8	3.8	3.8	1	1	1	1	1	1	1	1	1	AELQMLLEEEIPSGK	tr|B6VEX4|B6VEX4_HUMAN Isoform of Q8IZP0, Abl interactor 1 OS=Homo sapiens OX=9606 GN=ABI1 PE=1 SV=1;tr|A0A0A0MRT6|A0A0A0MRT6_HUMAN Isoform of Q8IZP0, Abl interactor 1 OS=Homo sapiens OX=9606 GN=ABI1 PE=1 SV=1;sp|Q8IZP0-11|ABI1_HUMAN Isoform of Q8IZP0, Iso	409	NaN
130	A0A0A0MRX2;Q96HY6-2;Q96HY6	A0A0A0MRX2;Q96HY6-2;Q96HY6	DDRGK domain-containing protein 1	DDRGK1	NaN	NaN	NaN	267370	79132	51582	NaN	NaN	NaN	3	1	1	1	4.7	4.7	4.7	33.939	0.00047192	3.968	4777000	398090	12	3	1	1	1	3208500	949590	618990	4.7	4.7	4.7	1	1	1	1	1	1	1	1	1	VVLLEDLASQVGLR	tr|A0A0A0MRX2|A0A0A0MRX2_HUMAN Isoform of Q96HY6, DDRGK domain-containing protein 1 OS=Homo sapiens OX=9606 GN=DDRGK1 PE=1 SV=1;sp|Q96HY6-2|DDRGK_HUMAN Isoform of Q96HY6, Isoform 2 of DDRGK domain-containing protein 1 OS=Homo sapiens OX=9606 GN=DDRGK1;sp|Q	17845	NaN
131	H0YC17;E7EMV7;A0A0A0MRZ4;Q15025-7;Q15025-8;Q15025-5;Q15025-6;Q15025-4;Q15025-3;Q15025-2;Q15025	H0YC17;E7EMV7;A0A0A0MRZ4;Q15025-7;Q15025-8;Q15025-5;Q15025-6;Q15025-4;Q15025-3;Q15025-2;Q15025	TNFAIP3-interacting protein 1	TNIP1	NaN	NaN	NaN	NaN	1671400	NaN	NaN	NaN	NaN	11	1	1	1	7.5	7.5	7.5	16.818	1	-2	10028000	1671400	6	1	0	1	0	0	10028000	0	0	7.5	0	0	1	0	0	1	0	0	1	0	QELVTQNELLK	tr|H0YC17|H0YC17_HUMAN Isoform of Q15025, TNFAIP3-interacting protein 1 (Fragment) OS=Homo sapiens OX=9606 GN=TNIP1 PE=1 SV=1;tr|E7EMV7|E7EMV7_HUMAN Isoform of Q15025, TNFAIP3-interacting protein 1 OS=Homo sapiens OX=9606 GN=TNIP1 PE=1 SV=1;tr|A0A0A0MRZ4|A	12927	NaN
132	A0A0A0MS29;Q9GZY8-2;Q9GZY8;Q9GZY8-4;Q9GZY8-5;Q9GZY8-3;C9JHF5;H7C433;E9PQX8;E9PPW6	A0A0A0MS29;Q9GZY8-2;Q9GZY8;Q9GZY8-4;Q9GZY8-5;Q9GZY8-3;C9JHF5;H7C433	Mitochondrial fission factor	MFF	18389000	19995000	NaN	1486400	747640	429240	NaN	NaN	NaN	10	4	4	4	24.4	24.4	24.4	25.302	0	13.819	63566000	2663300	14	7	3	3	1	36685000	20872000	6009300	24.4	18.1	5	3	3	1	3	3	1	3	3	1	GILSLIQSSTR;IVVAGNNEDVSFSRPADLDLIQSTPFKPLALK;LQLLEEENKER;PADLDLIQSTPFKPLALK	tr|A0A0A0MS29|A0A0A0MS29_HUMAN Isoform of Q9GZY8, Mitochondrial fission factor OS=Homo sapiens OX=9606 GN=MFF PE=1 SV=1;sp|Q9GZY8-2|MFF_HUMAN Isoform of Q9GZY8, Isoform 2 of Mitochondrial fission factor OS=Homo sapiens OX=9606 GN=MFF;sp|Q9GZY8|MFF_HUMAN Mi	5834;8408;10669;12692	NaN;NaN;NaN;NaN
133	A0A0A0MS41;A0A1P0AYU5;Q9BWM7;S4R3N9	A0A0A0MS41;A0A1P0AYU5;Q9BWM7;S4R3N9	Sideroflexin;Sideroflexin-3	SFXN3	NaN	NaN	NaN	115580	NaN	1062800	NaN	NaN	NaN	4	5	4	4	24	18.1	18.1	35.503	0	10.818	24690000	1178400	20	4	1	0	3	2311600	0	22378000	12.5	5.9	24	2	1	5	1	0	4	1	0	4	AGVVTPGITEDQLWR;FVPFAAVAAANCINIPLMR;QLGTAYVSATTGAVATALGLK;SSIHISNLEPELR;WDQSTFLGR	tr|A0A0A0MS41|A0A0A0MS41_HUMAN Isoform of Q9BWM7, Sideroflexin OS=Homo sapiens OX=9606 GN=SFXN3 PE=1 SV=1;tr|A0A1P0AYU5|A0A1P0AYU5_HUMAN Isoform of Q9BWM7, Sideroflexin OS=Homo sapiens OX=9606 GN=SFXN3 PE=1 SV=1;sp|Q9BWM7|SFXN3_HUMAN Sideroflexin-3 OS=Homo	649;5235;13116;14806;17992	NaN;NaN;NaN;NaN;NaN
134	A0A0A0MS74;H0YM31;Q16822-2;Q16822	A0A0A0MS74;H0YM31;Q16822-2;Q16822	Phosphoenolpyruvate carboxykinase [GTP], mitochondrial	PCK2	NaN	NaN	NaN	NaN	279460	NaN	NaN	NaN	NaN	4	1	1	1	3.2	3.2	3.2	47.532	0.00044425	3.435	5868700	279460	21	1	0	1	0	0	5868700	0	0	3.2	0	0	1	0	0	1	0	0	1	0	VLSGDLGQLPTGIR	tr|A0A0A0MS74|A0A0A0MS74_HUMAN Isoform of Q16822, Phosphoenolpyruvate carboxykinase [GTP], mitochondrial OS=Homo sapiens OX=9606 GN=PCK2 PE=1 SV=1;tr|H0YM31|H0YM31_HUMAN Isoform of Q16822, Phosphoenolpyruvate carboxykinase [GTP], mitochondrial OS=Homo sapi	17232	NaN
135	A0A0A0MS99;I3L4X2;P33527-8;P33527-6;P33527-7;P33527-5;P33527-4;P33527-2;P33527-3;P33527;P33527-9	A0A0A0MS99;I3L4X2;P33527-8;P33527-6;P33527-7;P33527-5;P33527-4;P33527-2;P33527-3;P33527;P33527-9	Multidrug resistance-associated protein 1	ABCC1	NaN	NaN	NaN	88774	1324100	1317700	NaN	NaN	NaN	11	3	3	3	3.2	3.2	3.2	134.99	0	6.2687	155640000	2730600	57	4	1	2	1	5060100	75475000	75108000	1.3	1.9	0.8	1	2	1	1	2	1	1	2	1	ITIIPQDPVLFSGSLR;LLIKFVNDTK;SSLLSALLAEMDK	tr|A0A0A0MS99|A0A0A0MS99_HUMAN Isoform of P33527, Multidrug resistance-associated protein 1 OS=Homo sapiens OX=9606 GN=ABCC1 PE=1 SV=1;tr|I3L4X2|I3L4X2_HUMAN Isoform of P33527, Multidrug resistance-associated protein 1 (Fragment) OS=Homo sapiens OX=9606 GN	8261;10157;14817	NaN;NaN;NaN
136	A0A0A0MSA0;Q16787-3;Q16787;K7EIP4;A0A0A0MTS5;A0A0A6YYF2;Q16787-4;Q16787-1	A0A0A0MSA0;Q16787-3;Q16787;K7EIP4;A0A0A0MTS5;A0A0A6YYF2;Q16787-4;Q16787-1	Laminin subunit alpha-3	LAMA3	NaN	NaN	NaN	54652	NaN	NaN	NaN	NaN	NaN	8	2	2	2	0.4	0.4	0.4	360.18	0.0019172	2.3649	9017500	54652	165	2	2	0	0	9017500	0	0	0.4	0	0	2	0	0	2	0	0	2	0	0	ALGAIQR;ITLNVGK	tr|A0A0A0MSA0|A0A0A0MSA0_HUMAN Isoform of Q16787, Laminin subunit alpha-3 OS=Homo sapiens OX=9606 GN=LAMA3 PE=1 SV=1;sp|Q16787-3|LAMA3_HUMAN Isoform of Q16787, Isoform 3 of Laminin subunit alpha-3 OS=Homo sapiens OX=9606 GN=LAMA3;sp|Q16787|LAMA3_HUMAN Lami	918;8273	NaN;NaN
137	A0A0A0MSB8;Q9UPT5-2;Q9UPT5-5;Q9UPT5-1;Q9UPT5-6;Q9UPT5;B5MCY9;K7ERQ5;A0A0A0MRE1;B4DJ07;Q9UPT5-4	A0A0A0MSB8;Q9UPT5-2;Q9UPT5-5;Q9UPT5-1;Q9UPT5-6;Q9UPT5;B5MCY9;K7ERQ5;A0A0A0MRE1;B4DJ07;Q9UPT5-4	Exocyst complex component 7	EXOC7	NaN	NaN	NaN	97180	34284	38427	NaN	NaN	NaN	11	2	2	2	3.8	3.8	3.8	78.808	0.00045269	3.5757	6116100	169890	36	4	1	2	1	3498500	1234200	1383400	2	3.8	2	1	2	1	1	2	1	1	2	1	HDFSTVLTVFPILR;NMVSILSSFESR	tr|A0A0A0MSB8|A0A0A0MSB8_HUMAN Isoform of Q9UPT5, Exocyst complex component 7 OS=Homo sapiens OX=9606 GN=EXOC7 PE=1 SV=1;sp|Q9UPT5-2|EXOC7_HUMAN Isoform of Q9UPT5, Isoform 2 of Exocyst complex component 7 OS=Homo sapiens OX=9606 GN=EXOC7;sp|Q9UPT5-5|EXOC7_	6586;12362	NaN;NaN
138	A0A1W2PQV5;A0A0A0MSE2;E9PF18;Q16836;Q16836-3;Q16836-2;A0A1W2PNM1;A0A0D9SFP2;A0A1W2PQC2;A0A1W2PRT2;A0A1W2PP40;A0A1W2PQ78;A0A1W2PQ55	A0A1W2PQV5;A0A0A0MSE2;E9PF18;Q16836;Q16836-3;Q16836-2;A0A1W2PNM1;A0A0D9SFP2;A0A1W2PQC2;A0A1W2PRT2	Hydroxyacyl-coenzyme A dehydrogenase, mitochondrial	HADH	25970000	24929000	26030000	3419500	1694600	1699600	NaN	NaN	NaN	13	5	5	5	41.6	41.6	41.6	26.479	0	10.887	103920000	6813800	11	11	6	2	3	59600000	18641000	25675000	41.6	8.6	14.3	5	2	3	5	2	3	5	2	3	FAGLHFFNPVPVMK;HVTVIGGGLMGAGIAQVAAATGHTVVLVDQTEDILAK;LLVPYLMEAIR;TFESLVDFSK;TLSTIATSTDAASVVHSTDLVVEAIVENLK	tr|A0A1W2PQV5|A0A1W2PQV5_HUMAN Isoform of Q16836, Hydroxyacyl-coenzyme A dehydrogenase, mitochondrial OS=Homo sapiens OX=9606 GN=HADH PE=1 SV=1;tr|A0A0A0MSE2|A0A0A0MSE2_HUMAN Isoform of Q16836, Hydroxyacyl-coenzyme A dehydrogenase, mitochondrial OS=Homo sa	4415;6973;10324;15339;15754	NaN;NaN;NaN;NaN;NaN
139	C9JHU6;C9JUM0;B5MCU4;A0A0A0MSH6;B5MDU6;Q9H6V9-4;Q9H6V9-3;Q9H6V9;Q9H6V9-2	C9JHU6;C9JUM0;B5MCU4;A0A0A0MSH6;B5MDU6;Q9H6V9-4;Q9H6V9-3;Q9H6V9;Q9H6V9-2	UPF0554 protein C2orf43	LDAH;C2orf43	NaN	NaN	NaN	NaN	688810	592690	NaN	NaN	NaN	9	1	1	1	7.7	7.7	7.7	14.957	0.00083195	2.9004	8970500	1281500	7	2	0	1	1	0	4821600	4148800	0	7.7	7.7	0	1	1	0	1	1	0	1	1	AFLLFPTIER	tr|C9JHU6|C9JHU6_HUMAN Isoform of Q9H6V9, Lipid droplet-associated hydrolase (Fragment) OS=Homo sapiens OX=9606 GN=LDAH PE=1 SV=1;tr|C9JUM0|C9JUM0_HUMAN Isoform of Q9H6V9, Lipid droplet-associated hydrolase (Fragment) OS=Homo sapiens OX=9606 GN=LDAH PE=1 S	502	NaN
140	A0A0A0MSH9;Q86WJ1-3;Q86WJ1-4;Q86WJ1-2;Q86WJ1;A0A0A0MRH8;Q86WJ1-5;A0A087WTM4	A0A0A0MSH9;Q86WJ1-3;Q86WJ1-4;Q86WJ1-2;Q86WJ1;A0A0A0MRH8;Q86WJ1-5	Chromodomain-helicase-DNA-binding protein 1-like	CHD1L	9112400	NaN	8988500	351250	15640	143100	NaN	NaN	NaN	8	4	4	4	5	5	5	89.974	0	5.7123	19763000	509990	37	6	2	1	3	12996000	578680	6187900	4.6	1.9	4	3	1	3	3	1	3	3	1	3	DLSLGGVLLFPVDDK;DLSLGGVLLFPVDDKESR;GSVLIPGLVEGSTK;LLQPFLLR	tr|A0A0A0MSH9|A0A0A0MSH9_HUMAN Isoform of Q86WJ1, Chromodomain-helicase-DNA-binding protein 1-like OS=Homo sapiens OX=9606 GN=CHD1L PE=1 SV=1;sp|Q86WJ1-3|CHD1L_HUMAN Isoform of Q86WJ1, Isoform 3 of Chromodomain-helicase-DNA-binding protein 1-like OS=Homo s	2640;2641;6331;10263	NaN;NaN;NaN;NaN
141	A0A0A0MSJ0;Q86XP3-2;Q86XP3	A0A0A0MSJ0;Q86XP3-2;Q86XP3	ATP-dependent RNA helicase DDX42	DDX42	27121000	18783000	17417000	499690	257980	612760	NaN	NaN	NaN	3	10	10	10	19.1	19.1	19.1	77.813	0	23.277	110260000	1370400	38	15	7	3	5	57016000	23386000	29854000	13.4	8.8	11.4	7	4	6	7	4	6	7	4	6	DILIDPIR;DIPVLVATDVAAR;DSNFAGDLVR;ELEPGDGPIAVIVCPTR;ELLDLAMQNAWFR;GLDIPSIK;IIDPLPPIDHSEIDYPPFEK;NFYNEHEEITNLTPQQLIDLR;TAAFIWPMLIHIMDQK;TVINYDVAR	tr|A0A0A0MSJ0|A0A0A0MSJ0_HUMAN Isoform of Q86XP3, ATP-dependent RNA helicase DDX42 OS=Homo sapiens OX=9606 GN=DDX42 PE=1 SV=1;sp|Q86XP3-2|DDX42_HUMAN Isoform of Q86XP3, Isoform 2 of ATP-dependent RNA helicase DDX42 OS=Homo sapiens OX=9606 GN=DDX42;sp|Q86XP	2406;2426;2874;3754;3808;5914;7560;12059;15086;16142	NaN;NaN;NaN;NaN;NaN;NaN;NaN;NaN;NaN;NaN
142	A0A0A0MSK5;Q5JTV8;J3KN66;Q5JTV8-3;H0Y4R4;H0YD16;H0YDU3;Q5JTV8-2	A0A0A0MSK5;Q5JTV8;J3KN66;Q5JTV8-3;H0Y4R4	Torsin-1A-interacting protein 1	TOR1AIP1	36960000	35779000	36088000	4077200	892250	1136100	NaN	NaN	NaN	8	7	7	6	19	19	16.9	52.406	0	18.178	164850000	6105500	27	9	5	2	2	110080000	24091000	30674000	19	5.6	8.7	7	2	3	7	2	3	6	2	3	CLSEQIADAYSSFR;FESFPAGSTLIFYK;SELGNQSPSTSSR;SIQEAPVSEDLVIR;SQPAILLLTAAR;TPQEWAPQTAR;YCDHENAAFK	tr|A0A0A0MSK5|A0A0A0MSK5_HUMAN Isoform of Q5JTV8, Torsin-1A-interacting protein 1 OS=Homo sapiens OX=9606 GN=TOR1AIP1 PE=1 SV=1;sp|Q5JTV8|TOIP1_HUMAN Torsin-1A-interacting protein 1 OS=Homo sapiens OX=9606 GN=TOR1AIP1 PE=1 SV=2;tr|J3KN66|J3KN66_HUMAN Isofo	1867;4577;14020;14316;14737;15889;18142	NaN;NaN;NaN;NaN;NaN;NaN;NaN
143	A0A0A0MSK6;Q13017-2;Q13017;G3V360;Q13017-3;Q13017-4	A0A0A0MSK6;Q13017-2;Q13017	Rho GTPase-activating protein 5	ARHGAP5	23342000	25603000	20525000	97372	60890	62220	NaN	NaN	NaN	6	5	5	5	5.7	5.7	5.7	171.68	0	12.934	65902000	220480	75	13	6	3	4	34661000	16415000	14826000	5.7	2.6	2.6	5	3	3	5	3	3	5	3	3	AFFADLPDPLIPYSLHPELLEAAK;AFNTLLPNLEEIEHLNWSEALK;VEQLLASSLLQLDHGR;VNLFILGK;YMANLPFTLILANQR	tr|A0A0A0MSK6|A0A0A0MSK6_HUMAN Isoform of Q13017, Rho GTPase-activating protein 5 OS=Homo sapiens OX=9606 GN=ARHGAP5 PE=1 SV=1;sp|Q13017-2|RHG05_HUMAN Isoform of Q13017, Isoform 2 of Rho GTPase-activating protein 5 OS=Homo sapiens OX=9606 GN=ARHGAP5;sp|Q13	474;511;16645;17364;18485	NaN;NaN;NaN;NaN;NaN
144	K7ERQ7;A0A0A0MSN0;K7EJH0;K7EMX1;K7EJV2;K7ESQ2;Q8NBT2-2;Q8NBT2	K7ERQ7;A0A0A0MSN0;K7EJH0;K7EMX1;K7EJV2;K7ESQ2;Q8NBT2-2;Q8NBT2	Kinetochore protein Spc24	SPC24	2993700	NaN	1351900	404940	88637	74818	NaN	NaN	NaN	8	1	1	1	13.5	13.5	13.5	13.596	0	6.9216	6959000	479750	6	5	2	1	2	5372100	531820	1055000	13.5	13.5	13.5	1	1	1	1	1	1	1	1	1	DIEEVSQGLLSLLGANR	tr|K7ERQ7|K7ERQ7_HUMAN Isoform of Q8NBT2, Kinetochore protein Spc24 (Fragment) OS=Homo sapiens OX=9606 GN=SPC24 PE=1 SV=1;tr|A0A0A0MSN0|A0A0A0MSN0_HUMAN Isoform of Q8NBT2, Kinetochore protein Spc24 OS=Homo sapiens OX=9606 GN=SPC24 PE=1 SV=1;tr|K7EJH0|K7EJH	2373	NaN
145	C9JP03;Q5T6P2;C9JD09;C9JUW9;X6RDJ2;Q5T6P1;X6RGK9;A0A0C4DFN6;A0A0A0MSS3;Q8ND83-2;Q8ND83-4;Q8ND83	C9JP03;Q5T6P2;C9JD09;C9JUW9;X6RDJ2;Q5T6P1;X6RGK9;A0A0C4DFN6;A0A0A0MSS3;Q8ND83-2;Q8ND83-4;Q8ND83	SLAIN motif-containing protein 1	SLAIN1	NaN	NaN	NaN	1853900	1015200	1000900	NaN	NaN	NaN	12	1	1	1	7.1	7.1	7.1	11.269	0.0047777	2.056	23220000	3870000	6	3	1	1	1	11124000	6091100	6005100	7.1	7.1	7.1	1	1	1	1	1	1	1	1	1	LQEESLR	tr|C9JP03|C9JP03_HUMAN Isoform of Q8ND83, SLAIN motif-containing protein 1 (Fragment) OS=Homo sapiens OX=9606 GN=SLAIN1 PE=1 SV=1;tr|Q5T6P2|Q5T6P2_HUMAN Isoform of Q8ND83, SLAIN motif-containing protein 1 (Fragment) OS=Homo sapiens OX=9606 GN=SLAIN1 PE=1 S	10623	NaN
146	A0A0G2JKZ1;A2AB90;A0A0G2JH37;A0A0A0MSV9;O15533-2;O15533;O15533-3;Q6P1N7;C9JA35;A0A0A0MT98;O15533-4	A0A0G2JKZ1;A2AB90;A0A0G2JH37;A0A0A0MSV9;O15533-2;O15533;O15533-3;Q6P1N7;C9JA35;A0A0A0MT98;O15533-4	Tapasin	TAPBP	NaN	NaN	NaN	1263000	999650	760140	NaN	NaN	NaN	11	2	2	2	4.7	4.7	4.7	47.606	0	4.2926	42319000	3022800	14	4	1	2	1	17682000	13995000	10642000	2.2	4.7	2.2	1	2	1	1	2	1	1	2	1	GAPAPHCEMSR;VSLMPATLAR	tr|A0A0G2JKZ1|A0A0G2JKZ1_HUMAN Isoform of O15533, Tapasin OS=Homo sapiens OX=9606 GN=TAPBP PE=1 SV=1;tr|A2AB90|A2AB90_HUMAN Isoform of O15533, Tapasin OS=Homo sapiens OX=9606 GN=TAPBP PE=1 SV=1;tr|A0A0G2JH37|A0A0G2JH37_HUMAN Isoform of O15533, Tapasin OS=H	5357;17614	NaN;NaN
147	A0A0A0MSW3;P35658-2;P35658-4;P35658;P35658-3;P35658-5;E9PKD2;B7ZAV2;H0Y837	A0A0A0MSW3;P35658-2;P35658-4;P35658;P35658-3;P35658-5;E9PKD2;B7ZAV2;H0Y837	Nuclear pore complex protein Nup214	NUP214	NaN	NaN	NaN	177660	120370	58436	NaN	NaN	NaN	9	4	4	4	5.2	5.2	5.2	152.57	0	9.6171	36632000	236090	49	8	4	2	2	24283000	5897900	6451000	4	2.6	2.4	3	2	2	3	2	2	3	2	2	DSDPVMAGIGEEIAHFQK;FAVQDVNDVLDLEWDQHLEQK;LGELLFPSSLAGETLGSFSGLR;TSGVPSGFNFTAPPVLGK	tr|A0A0A0MSW3|A0A0A0MSW3_HUMAN Isoform of P35658, Nuclear pore complex protein Nup214 OS=Homo sapiens OX=9606 GN=NUP214 PE=1 SV=1;sp|P35658-2|NU214_HUMAN Isoform of P35658, Isoform 2 of Nuclear pore complex protein Nup214 OS=Homo sapiens OX=9606 GN=NUP214;	2846;4458;9629;15984	NaN;NaN;NaN;NaN
148	A0A0A0MSW4;P48739;P48739-2;P48739-3;B3KYB7;B3KYB6	A0A0A0MSW4;P48739;P48739-2;P48739-3;B3KYB7;B3KYB6	Phosphatidylinositol transfer protein beta isoform	PITPNB	NaN	NaN	NaN	2039500	339410	364170	NaN	NaN	NaN	6	4	4	4	22.1	22.1	22.1	31.581	0	8.2621	75612000	2743000	18	6	4	1	1	62948000	6109400	6555000	22.1	4.8	4.8	4	1	1	4	1	1	4	1	1	ADEDPALFQSVK;NETGGGEGIEVLK;TVEIVHIDIADR;VVLPCSVQEYQVGQLYSVAEASK	tr|A0A0A0MSW4|A0A0A0MSW4_HUMAN Isoform of P48739, Phosphatidylinositol transfer protein beta isoform OS=Homo sapiens OX=9606 GN=PITPNB PE=1 SV=1;sp|P48739|PIPNB_HUMAN Phosphatidylinositol transfer protein beta isoform OS=Homo sapiens OX=9606 GN=PITPNB PE=1	259;12003;16111;17849	NaN;NaN;NaN;NaN
149	H7BZR5;A0A0A0MSY6;Q86XH1-2;Q86XH1-5;Q86XH1	H7BZR5;A0A0A0MSY6;Q86XH1-2;Q86XH1-5;Q86XH1	IQ and AAA domain-containing protein 1	IQCA1	NaN	NaN	NaN	NaN	NaN	241360	NaN	NaN	NaN	5	1	1	1	2.8	2.8	2.8	63.482	1	-2	6275300	241360	26	1	0	0	1	0	0	6275300	0	0	2.8	0	0	1	0	0	1	0	0	1	IQVDELMRQELKNLK	tr|H7BZR5|H7BZR5_HUMAN Isoform of Q86XH1, Dynein regulatory complex protein 11 (Fragment) OS=Homo sapiens OX=9606 GN=IQCA1 PE=1 SV=1;tr|A0A0A0MSY6|A0A0A0MSY6_HUMAN Isoform of Q86XH1, Dynein regulatory complex protein 11 OS=Homo sapiens OX=9606 GN=IQCA1 PE=	8082	NaN
150	A0A0A0MTN9;A0A0A0MTR6;A0A0C4DFN8;A0A0C4DGN7;A0A0A0MSZ4;A0A0A0MT64;P22570-4;P22570-6;P22570-5;P22570;P22570-2;P22570-7;P22570-3;J3QQX3	A0A0A0MTN9;A0A0A0MTR6;A0A0C4DFN8;A0A0C4DGN7;A0A0A0MSZ4;A0A0A0MT64;P22570-4;P22570-6;P22570-5;P22570;P22570-2;P22570-7;P22570-3;J3QQX3	NADPH:adrenodoxin oxidoreductase, mitochondrial	FDXR	NaN	NaN	NaN	NaN	175510	35232	NaN	NaN	NaN	14	2	2	2	4.8	4.8	4.8	48.027	0.0004662	3.8752	5690000	210740	27	2	0	1	1	0	4738700	951260	0	4.8	3.2	0	2	1	0	2	1	0	2	1	LTELLLR;PILDPVDFLGLQDK	tr|A0A0A0MTN9|A0A0A0MTN9_HUMAN Isoform of P22570, NADPH:adrenodoxin oxidoreductase, mitochondrial OS=Homo sapiens OX=9606 GN=FDXR PE=1 SV=1;tr|A0A0A0MTR6|A0A0A0MTR6_HUMAN Isoform of P22570, NADPH:adrenodoxin oxidoreductase, mitochondrial OS=Homo sapiens OX	10949;12750	NaN;NaN
151	A0A0A0MT33;O95104-2;O95104-3;O95104;Q9UPN6;Q9UPN6-2	A0A0A0MT33;O95104-2;O95104-3;O95104;Q9UPN6;Q9UPN6-2	Splicing factor, arginine/serine-rich 15;Protein SCAF8	SCAF8;SCAF4	NaN	NaN	NaN	469210	241230	193960	NaN	NaN	NaN	6	1	1	1	0.9	0.9	0.9	148.86	0.00043573	3.2705	38889000	904400	43	4	1	1	2	20176000	10373000	8340400	0.9	0.9	0.9	1	1	1	1	1	1	1	1	1	VPGLYVIDSIVR	tr|A0A0A0MT33|A0A0A0MT33_HUMAN Isoform of Q9UPN6, Protein SCAF8 OS=Homo sapiens OX=9606 GN=SCAF8 PE=1 SV=1;sp|O95104-2|SFR15_HUMAN Isoform of O95104, Isoform 2 of Splicing factor, arginine/serine-rich 15 OS=Homo sapiens OX=9606 GN=SCAF4;sp|O95104-3|SFR15_H	17428	NaN
152	A0A0A0MT60;Q5T1M5-2;Q5T1M5	A0A0A0MT60;Q5T1M5-2;Q5T1M5	Peptidyl-prolyl cis-trans isomerase;FK506-binding protein 15	FKBP15	NaN	NaN	NaN	476490	27175	18743	NaN	NaN	NaN	3	2	2	2	2.5	2.5	2.5	136.27	0.00082747	2.8511	29777000	45918	57	3	1	1	1	27160000	1549000	1068300	1.6	0.9	0.9	1	1	1	1	1	1	1	1	1	TILGTIMNTIK;VQAKLSELQETSEQAQSKFK	tr|A0A0A0MT60|A0A0A0MT60_HUMAN Isoform of Q5T1M5, Peptidylprolyl isomerase (Fragment) OS=Homo sapiens OX=9606 GN=FKBP15 PE=1 SV=1;sp|Q5T1M5-2|FKB15_HUMAN Isoform of Q5T1M5, Isoform 2 of FK506-binding protein 15 OS=Homo sapiens OX=9606 GN=FKBP15;sp|Q5T1M5|F	15564;17486	NaN;NaN
153	A0A0A0MT83;P26440;H0YN10;A0A087WVD3;P26440-2	A0A0A0MT83;P26440;H0YN10;A0A087WVD3;P26440-2	Isovaleryl-CoA dehydrogenase, mitochondrial	IVD	NaN	23203000	18518000	NaN	744130	562340	NaN	NaN	NaN	5	2	2	2	3.8	3.8	3.8	46.65	0.0004697	3.9396	28742000	1306500	22	4	0	2	2	0	16371000	12372000	0	3.8	3.8	0	2	2	0	2	2	0	2	2	AFNADFH;FLQEHLAPK	tr|A0A0A0MT83|A0A0A0MT83_HUMAN Isoform of P26440, Isovaleryl-CoA dehydrogenase, mitochondrial OS=Homo sapiens OX=9606 GN=IVD PE=1 SV=1;sp|P26440|IVD_HUMAN Isovaleryl-CoA dehydrogenase, mitochondrial OS=Homo sapiens OX=9606 GN=IVD PE=1 SV=2;tr|H0YN10|H0YN10	508;4891	NaN;NaN
154	A0A0A0MTB8;Q8NI36	A0A0A0MTB8;Q8NI36	WD repeat-containing protein 36	WDR36	NaN	NaN	NaN	173960	144110	228990	NaN	NaN	NaN	2	3	3	3	4.6	4.6	4.6	99.365	0	5.5676	32892000	402940	40	5	2	1	2	17968000	5764400	9159500	3.2	1.6	3	2	1	2	2	1	2	2	1	2	ALGLFSNDIPHVVR;IWIFDGPTGEGR;SAPFFIPTIPGLVPR	tr|A0A0A0MTB8|A0A0A0MTB8_HUMAN Isoform of Q8NI36, WD repeat-containing protein 36 OS=Homo sapiens OX=9606 GN=WDR36 PE=1 SV=1;sp|Q8NI36|WDR36_HUMAN WD repeat-containing protein 36 OS=Homo sapiens OX=9606 GN=WDR36 PE=1 SV=1	926;8426;13845	NaN;NaN;NaN
155	A0A0A0MTR7;A0A0A0MTC1;Q63HN8;Q63HN8-4;Q63HN8-6	A0A0A0MTR7;A0A0A0MTC1;Q63HN8;Q63HN8-4	E3 ubiquitin-protein ligase RNF213	RNF213	NaN	NaN	NaN	31881	14245	7975.5	NaN	NaN	NaN	5	3	3	3	1	1	1	591.4	0	7.2799	14824000	14245	274	4	2	1	1	8735400	3903300	2185300	0.7	0.3	0.3	2	1	1	2	1	1	2	1	1	DLQQYVSVVVLDEVGLAEDSPK;FATSLVDNSVPLLR;IIYGDPVTFLPHLPR	tr|A0A0A0MTR7|A0A0A0MTR7_HUMAN Isoform of Q63HN8, E3 ubiquitin-protein ligase RNF213 OS=Homo sapiens OX=9606 GN=RNF213 PE=1 SV=1;tr|A0A0A0MTC1|A0A0A0MTC1_HUMAN Isoform of Q63HN8, E3 ubiquitin-protein ligase RNF213 OS=Homo sapiens OX=9606 GN=RNF213 PE=1 SV=	2626;4454;7660	NaN;NaN;NaN
156	A0A0A0MTH3;Q13418-3;Q13418-2;Q13418	A0A0A0MTH3;Q13418-3;Q13418-2;Q13418	Integrin-linked protein kinase	ILK	NaN	13798000	13812000	295340	231810	280360	NaN	NaN	NaN	4	2	2	2	5	5	5	54.611	0.00047304	3.9792	24467000	807500	24	5	1	2	2	7088200	8514600	8864200	2.1	5	5	1	2	2	1	2	2	1	2	2	FDMIVPILEK;GMAFLHTLEPLIPR	tr|A0A0A0MTH3|A0A0A0MTH3_HUMAN Isoform of Q13418, Integrin-linked protein kinase OS=Homo sapiens OX=9606 GN=ILK PE=1 SV=1;sp|Q13418-3|ILK_HUMAN Isoform of Q13418, Isoform 3 of Integrin-linked protein kinase OS=Homo sapiens OX=9606 GN=ILK;sp|Q13418-2|ILK_HU	4512;6062	NaN;NaN
157	A0A0A0MTH9;O14981	A0A0A0MTH9;O14981	TATA-binding protein-associated factor 172	BTAF1	NaN	NaN	NaN	26103	NaN	NaN	NaN	NaN	NaN	2	1	1	1	0.8	0.8	0.8	206.93	0.0022796	2.3055	2218700	26103	85	0	0	0	0	2218700	0	0	0.8	0	0	1	0	0	1	0	0	1	0	0	LFILLDTGTTPVTR	tr|A0A0A0MTH9|A0A0A0MTH9_HUMAN Isoform of O14981, TATA-binding protein-associated factor 172 OS=Homo sapiens OX=9606 GN=BTAF1 PE=1 SV=1;sp|O14981|BTAF1_HUMAN TATA-binding protein-associated factor 172 OS=Homo sapiens OX=9606 GN=BTAF1 PE=1 SV=2	9521	NaN
158	B8ZWD1;A0A0A0MTI5;P07108;P07108-3;P07108-2;P07108-4;P07108-5;P07108-6	B8ZWD1;A0A0A0MTI5;P07108;P07108-3;P07108-2;P07108-4;P07108-5	Acyl-CoA-binding protein	DBI	NaN	NaN	NaN	7111600	647850	NaN	NaN	NaN	NaN	8	3	3	3	45.4	45.4	45.4	11.15	0	7.8845	110680000	7759500	5	3	2	1	0	107440000	3239300	0	45.4	20.6	0	3	1	0	3	1	0	3	1	0	QATVGDINTERPGMLDFTGK;TKPSDEEMLFIYGHYK;WDAWNELK	tr|B8ZWD1|B8ZWD1_HUMAN Isoform of P07108, Acyl-CoA-binding protein OS=Homo sapiens OX=9606 GN=DBI PE=1 SV=1;tr|A0A0A0MTI5|A0A0A0MTI5_HUMAN Isoform of P07108, Acyl-CoA-binding protein OS=Homo sapiens OX=9606 GN=DBI PE=1 SV=1;sp|P07108|ACBP_HUMAN Acyl-CoA-bi	12864;15618;17987	NaN;NaN;NaN
159	A0A0A0MTI6;Q9NYP7-3;Q9NYP7;Q9NYP7-2	A0A0A0MTI6;Q9NYP7-3;Q9NYP7;Q9NYP7-2	Elongation of very long chain fatty acids protein;Elongation of very long chain fatty acids protein 5	ELOVL5	NaN	NaN	NaN	1006100	494620	381600	NaN	NaN	NaN	4	1	1	1	5	5	5	30.742	0.00045005	3.5246	20705000	1882300	11	2	0	1	1	11067000	5440800	4197600	5	5	5	1	1	1	1	1	1	1	1	1	MEHFDASLSTYFK	tr|A0A0A0MTI6|A0A0A0MTI6_HUMAN Isoform of Q9NYP7, Elongation of very long chain fatty acids protein OS=Homo sapiens OX=9606 GN=ELOVL5 PE=1 SV=1;sp|Q9NYP7-3|ELOV5_HUMAN Isoform of Q9NYP7, Isoform 3 of Elongation of very long chain fatty acids protein 5 OS=H	11465	NaN
160	A0A0R4J2G3;A0A0A0MTJ9;Q6PIU2;Q6PIU2-2;Q6PIU2-3;H7C046	A0A0R4J2G3;A0A0A0MTJ9;Q6PIU2;Q6PIU2-2;Q6PIU2-3;H7C046	Neutral cholesterol ester hydrolase 1	NCEH1	139450000	167100000	182960000	19183000	11225000	11140000	NaN	NaN	NaN	6	10	10	10	26.6	26.6	26.6	49.062	0	37.438	1143600000	41548000	21	51	18	17	16	525440000	312740000	305370000	26.6	23.9	21.8	10	9	8	10	9	8	10	9	8	IVQELPQLLDAR;NYKPVVQTTGNAR;SAPLIADQAVLQLLPK;SAWSSAQVK;TYILTCEHDVLR;VFEGPPKPEEPLKR;VTDTDFDGVEVR;VYFPEQIHDVVR;YFLKPEVLQK;YMVDPGR	tr|A0A0R4J2G3|A0A0R4J2G3_HUMAN Isoform of Q6PIU2, Arylacetamide deacetylase-like 1 OS=Homo sapiens OX=9606 GN=NCEH1 PE=1 SV=1;tr|A0A0A0MTJ9|A0A0A0MTJ9_HUMAN Isoform of Q6PIU2, Neutral cholesterol ester hydrolase 1 OS=Homo sapiens OX=9606 GN=NCEH1 PE=1 SV=1	8393;12669;13847;13863;16246;16696;17674;17940;18260;18495	NaN;NaN;NaN;NaN;NaN;NaN;NaN;NaN;NaN;NaN
161	Q5T2B5;A0A0A0MTN0;Q13617;Q13617-2;Q5T2B7	Q5T2B5;A0A0A0MTN0;Q13617;Q13617-2	Cullin-2	CUL2	16704000	11490000	12990000	269780	251000	264450	NaN	NaN	NaN	5	5	5	5	7.5	7.5	7.5	82.358	0	11.215	49456000	785230	39	9	2	3	4	21840000	13133000	14483000	4.5	7.5	6.4	2	4	4	2	4	4	2	4	4	AVSTGLPHMIQELQNHIHDEGLR;IFLENHVR;KLMVEPLQAILIR;LMVEPLQAILIR;LTSFITVFK	tr|Q5T2B5|Q5T2B5_HUMAN Isoform of Q13617, Cullin-2 OS=Homo sapiens OX=9606 GN=CUL2 PE=1 SV=1;tr|A0A0A0MTN0|A0A0A0MTN0_HUMAN Isoform of Q13617, Cullin-2 OS=Homo sapiens OX=9606 GN=CUL2 PE=1 SV=1;sp|Q13617|CUL2_HUMAN Cullin-2 OS=Homo sapiens OX=9606 GN=CUL2	1663;7352;8772;10379;11041	NaN;NaN;NaN;NaN;NaN
162	P21266;A0A0A0MTN3;Q5T8Q9	P21266;A0A0A0MTN3	Glutathione S-transferase Mu 3	GSTM3	20939000	13414000	11805000	2715100	589400	548930	NaN	NaN	NaN	3	5	5	3	22.7	22.7	15.6	26.559	0	10.158	65507000	3853400	17	9	4	2	3	46156000	10020000	9331700	18.7	9.8	13.8	4	2	3	4	2	3	2	1	2	GLAHAIR;ITQSNAILR;LCYSSDHEK;LDLDFPNLPYLLDGK;YTCGEAPDYDR	sp|P21266|GSTM3_HUMAN Glutathione S-transferase Mu 3 OS=Homo sapiens OX=9606 GN=GSTM3 PE=1 SV=3;tr|A0A0A0MTN3|A0A0A0MTN3_HUMAN Isoform of P21266, Glutathione S-transferase OS=Homo sapiens OX=9606 GN=GSTM3 PE=1 SV=1	5893;8294;9183;9244;18611	NaN;NaN;NaN;NaN;NaN
163	A0A0A0MTQ0;O15091-3;O15091-4;O15091-2;O15091	A0A0A0MTQ0;O15091-3;O15091-4;O15091-2;O15091	Mitochondrial ribonuclease P protein 3	KIAA0391	NaN	NaN	NaN	NaN	588140	551680	NaN	NaN	NaN	5	2	2	2	16.2	16.2	16.2	21.699	0	4.637	14883000	1139800	9	4	1	1	2	0	5293300	9589400	7.6	7.6	16.2	1	1	2	1	1	2	1	1	2	ESQLLLNVVSQLAK;SRPPFDVVIDGLNVAK	tr|A0A0A0MTQ0|A0A0A0MTQ0_HUMAN Isoform of O15091, Mitochondrial ribonuclease P catalytic subunit (Fragment) OS=Homo sapiens OX=9606 GN=KIAA0391 PE=1 SV=1;sp|O15091-3|MRPP3_HUMAN Isoform of O15091, Isoform 3 of Mitochondrial ribonuclease P catalytic subunit	4142;14768	NaN;NaN
164	P06744;A0A2U3TZU2;A0A0A0MTS2;P06744-2;K7EQ48;A0A2R8Y6C7;A0A0J9YYH3;A0A0J9YXP8;A0A0J9YX90;K7ERC6;K7EPY4;K7EP41;CON__Q3ZBD7;K7ENA0;K7ESF4;A0A0J9YXM3;K7ELR7;A0A2R8YF08;K7EIL4;K7ERK8;A0A0J9YXH9;A0A0J9YYI8	P06744;A0A2U3TZU2;A0A0A0MTS2;P06744-2;K7EQ48;A0A2R8Y6C7;A0A0J9YYH3;A0A0J9YXP8;A0A0J9YX90	Glucose-6-phosphate isomerase	GPI	354230000	337430000	280540000	82651000	38329000	29126000	NaN	NaN	NaN	22	20	20	20	49.5	49.5	49.5	63.146	0	168.25	6728800000	150110000	26	131	52	41	38	3846600000	1647500000	1234800000	49.5	43.5	43.5	20	19	18	20	19	18	20	19	18	AVLHVALR;DVMPEVNK;EWFLQAAK;FAAYFQQGDMESNGK;HFVALSTNTTK;IEPELDGSAQVTSHDASTNGLINFIK;ILLANFLAQTEALMR;KIEPELDGSAQVTSHDASTNGLINFIK;LTPFMLGALVAMYEHK;MIPCDFLIPVQTQHPIR;MIPCDFLIPVQTQHPIRK;MLVDLAK;NLVTEDVMR;SNTPILVDGKDVMPEVNK;TFTTQETITNAETAK;TITDVINIGIGGSDLGPLMVTEALKPYSSGGPR;TLAQLNPESSLFIIASK;VDHQTGPIVWGEPGTNGQHAFYQLIHQGTK;VFEGNRPTNSIVFTK;VWYVSNIDGTHIAK	sp|P06744|G6PI_HUMAN Glucose-6-phosphate isomerase OS=Homo sapiens OX=9606 GN=GPI PE=1 SV=4;tr|A0A2U3TZU2|A0A2U3TZU2_HUMAN Isoform of P06744, Glucose-6-phosphate isomerase OS=Homo sapiens OX=9606 GN=GPI PE=1 SV=1;tr|A0A0A0MTS2|A0A0A0MTS2_HUMAN Isoform of P	1624;2993;4337;4393;6666;7278;7788;8726;11018;11575;11576;11652;12331;14630;15383;15596;15637;16474;16695;17928	NaN;NaN;NaN;NaN;NaN;NaN;NaN;NaN;NaN;NaN;NaN;NaN;NaN;NaN;NaN;NaN;NaN;NaN;NaN;NaN
165	A0A0A6YYA0;Q86XR7-2;Q9Y3B3-2;Q9Y3B3	A0A0A6YYA0;Q86XR7-2;Q9Y3B3-2;Q9Y3B3	Transmembrane emp24 domain-containing protein 7	TMED7-TICAM2;TMED7	40263000	NaN	42435000	8120300	1761700	2951900	NaN	NaN	NaN	4	4	4	4	28.7	28.7	28.7	21.233	0	9.0425	160180000	1761700	11	8	3	2	3	89323000	38388000	32471000	22.3	15.4	23.4	3	2	3	3	2	3	3	2	3	FCFSNEFSTFTHK;KQYDSFTFTASK;SVIDYQTHFR;VSALTQMESACVSIHEALK	tr|A0A0A6YYA0|A0A0A6YYA0_HUMAN Protein TMED7-TICAM2 OS=Homo sapiens OX=9606 GN=TMED7-TICAM2 PE=3 SV=1;sp|Q86XR7-2|TCAM2_HUMAN Isoform of Q86XR7, Isoform 2 of TIR domain-containing adapter molecule 2 OS=Homo sapiens OX=9606 GN=TICAM2;sp|Q9Y3B3-2|TMED7_HUMAN	4469;8890;14961;17564	NaN;NaN;NaN;NaN
166	H7BYZ6;A0A0A6YYF3;Q9Y575-2;Q9Y575;Q9Y575-3	H7BYZ6;A0A0A6YYF3;Q9Y575-2;Q9Y575;Q9Y575-3	Ankyrin repeat and SOCS box protein 3	GPR75-ASB3;ASB3	NaN	NaN	NaN	176770	NaN	78031	NaN	NaN	NaN	5	1	1	1	2.3	2.3	2.3	52.777	0.0011853	2.5368	3822000	254800	15	1	0	0	1	2651600	0	1170500	2.3	0	2.3	1	0	1	1	0	1	1	0	1	ILDLLIPLTNR	tr|H7BYZ6|H7BYZ6_HUMAN Isoform of Q9Y575, Ankyrin repeat and SOCS box protein 3 (Fragment) OS=Homo sapiens OX=9606 GN=ASB3 PE=4 SV=1;tr|A0A0A6YYF3|A0A0A6YYF3_HUMAN Protein GPR75-ASB3 OS=Homo sapiens OX=9606 GN=GPR75-ASB3 PE=1 SV=1;sp|Q9Y575-2|ASB3_HUMAN Is	7710	NaN
167	F8WDD7;F8WCF6;A0A0A6YYG9;P59998;P59998-2;P59998-3;F8WE39;H7C0A3;F8WDW3;R4GN08;P59998-4	F8WDD7;F8WCF6;A0A0A6YYG9;P59998;P59998-2;P59998-3;F8WE39;H7C0A3	Actin-related protein 2/3 complex subunit 4	ARPC4;ARPC4-TTLL3	79036000	85015000	83426000	21665000	12338000	12500000	NaN	NaN	NaN	11	4	4	4	35.4	35.4	35.4	13.057	0	9.7947	299180000	46503000	6	12	4	3	5	144290000	74026000	80856000	24.8	24.8	35.4	3	3	4	3	3	4	3	3	4	AENFFILR;HNKPEVEVR;TATLRPYLSAVR;VLIEGSINSVR	tr|F8WDD7|F8WDD7_HUMAN Isoform of P59998, Actin-related protein 2/3 complex subunit 4 OS=Homo sapiens OX=9606 GN=ARPC4 PE=4 SV=1;tr|F8WCF6|F8WCF6_HUMAN Isoform of A0A0A6YYG9, Actin-related protein 2/3 complex subunit 4 OS=Homo sapiens OX=9606 GN=ARPC4-TTLL	416;6821;15148;17138	NaN;NaN;NaN;NaN
168	Q96HJ9-2;A0A0A6YYJ8;Q9Y383-3;Q9Y383-2;Q9Y383;B8ZZ09	Q96HJ9-2;A0A0A6YYJ8;Q9Y383-3;Q9Y383-2;Q9Y383	Putative RNA-binding protein Luc7-like 2	LUC7L2	NaN	NaN	NaN	3758800	549760	640750	NaN	NaN	NaN	6	6	6	4	16.6	16.6	11.8	54.223	0	22.014	113830000	4949300	20	9	5	2	2	75176000	25843000	12815000	13.3	7.4	5.9	5	3	2	5	3	2	3	2	1	LAETQEEISAEVAAK;NSMPASSFQQQK;REAEEVYR;SHLLNCCPHDVLSGTR;VEQLGAEGNVEESQK;VHELNEEIGK	sp|Q96HJ9-2|FMC1_HUMAN Isoform of Q96HJ9, Isoform 2 of Protein FMC1 homolog OS=Homo sapiens OX=9606 GN=FMC1;tr|A0A0A6YYJ8|A0A0A6YYJ8_HUMAN Isoform of Q9Y383, Putative RNA-binding protein Luc7-like 2 OS=Homo sapiens OX=9606 GN=LUC7L2 PE=4 SV=1;sp|Q9Y383-3|L	9007;12497;13459;14216;16644;16871	NaN;NaN;NaN;NaN;NaN;NaN
169	I3L1U7;I3L0X9;I3L3T0;P57737-3;A0A0A6YYL4;Q9Y3D7	I3L1U7;I3L0X9;I3L3T0;P57737-3;A0A0A6YYL4;Q9Y3D7	Coronin;Mitochondrial import inner membrane translocase subunit TIM16	PAM16;CORO7-PAM16	NaN	NaN	NaN	NaN	404040	432290	NaN	NaN	NaN	6	1	1	1	17.8	17.8	17.8	14.013	0.0012185	2.7343	6690600	836330	8	2	0	1	1	0	3232300	3458300	0	17.8	17.8	0	1	1	0	1	1	0	1	1	SAAASNLSGLSLQEAQQILNVSK	tr|I3L1U7|I3L1U7_HUMAN Isoform of Q9Y3D7, Mitochondrial import inner membrane translocase subunit TIM16 OS=Homo sapiens OX=9606 GN=PAM16 PE=4 SV=1;tr|I3L0X9|I3L0X9_HUMAN Isoform of Q9Y3D7, Mitochondrial import inner membrane translocase subunit TIM16 OS=Ho	13789	NaN
170	E9PL47;F8W860;A0A0B4J1S8;Q9UBF8-3;Q9UBF8-2;Q9UBF8	E9PL47;F8W860;A0A0B4J1S8;Q9UBF8-3;Q9UBF8-2;Q9UBF8	Phosphatidylinositol 4-kinase beta	PI4KB	NaN	NaN	NaN	3567300	NaN	NaN	NaN	NaN	NaN	6	1	1	1	11.6	11.6	11.6	10.825	0.0022753	2.2972	17837000	3567300	5	1	1	0	0	17837000	0	0	11.6	0	0	1	0	0	1	0	0	1	0	0	RLATLPTKEQK	tr|E9PL47|E9PL47_HUMAN Isoform of Q9UBF8, Phosphatidylinositol 4-kinase beta (Fragment) OS=Homo sapiens OX=9606 GN=PI4KB PE=1 SV=1;tr|F8W860|F8W860_HUMAN Isoform of Q9UBF8, Phosphatidylinositol 4-kinase beta (Fragment) OS=Homo sapiens OX=9606 GN=PI4KB PE=1	13588	NaN
171	A0A0B4J1W3;Q9BXJ9;Q9BXJ9-4;Q6N069-5;Q6N069-4;Q6N069-3;Q6N069-2;Q6N069	A0A0B4J1W3;Q9BXJ9;Q9BXJ9-4	N-alpha-acetyltransferase 15, NatA auxiliary subunit	NAA15	30104000	39652000	43194000	1625400	966870	982420	NaN	NaN	NaN	8	8	8	8	10.9	10.9	10.9	101.2	0	53.451	214700000	3574700	52	16	6	4	6	107040000	56572000	51086000	10.9	6.5	6.5	8	5	5	8	5	5	8	5	5	AIELATTLDESLTNR;DLSLLQIQMR;EALEHLCTYEK;GELLLQLCR;LEDAADVYR;NFNETFLK;NLQTCMEVLEALYDGSLGDCK;YQLLQLRPAQR	tr|A0A0B4J1W3|A0A0B4J1W3_HUMAN Isoform of Q9BXJ9, N-alpha-acetyltransferase 15, NatA auxiliary subunit OS=Homo sapiens OX=9606 GN=NAA15 PE=1 SV=1;sp|Q9BXJ9|NAA15_HUMAN N-alpha-acetyltransferase 15, NatA auxiliary subunit OS=Homo sapiens OX=9606 GN=NAA15 PE	715;2642;3177;5527;9336;12045;12308;18554	NaN;NaN;NaN;NaN;NaN;NaN;NaN;NaN
172	I3L2W8;O43497-6;O95180-2;A0A1W2PR14;A0A1W2PQ19;A0A0B4J1X2;O43497-20;O43497-21;O43497-15;O43497-9;O43497-13;O43497-17;Q9P0X4-2;O43497-11;O43497-25;O43497-8;O43497-4;O43497-10;O43497-34;O43497-7;O43497-12;O43497-33;O95180;O43497-16;O43497-24;O43497-36;O43497-2;O43497-5;O43497-27;O43497-28;O43497-29;O43497-30;O43497-32;O43497-31;Q9P0X4-3;Q9P0X4-4;A0A1W2PQW2;O43497-35;O43497-19;O43497-18;Q9P0X4;O4349…	I3L2W8;O43497-6;O95180-2;A0A1W2PR14;A0A1W2PQ19;A0A0B4J1X2;O43497-20;O43497-21;O43497-15;O43497-9;O43497-13;O43497-17;Q9P0X4-2;O43497-11;O43497-25;O43497-8;O43497-4;O43497-10;O43497-34;O43497-7;O43497-12;O43497-33;O95180;O43497-16;O43497-24;O43497-36;O43497-2;O43497-5;O43497-27;O43497-28;O43497-29;O43497-30;O43497-32;O43497-31;Q9P0X4-3;Q9P0X4-4;A0A1W2PQW2;O43497-35;O43497-19;O43497-18;Q9P0X4;O4349…	Voltage-dependent T-type calcium channel subunit alpha-1G;Voltage-dependent T-type calcium channel subunit alpha-1H;Voltage-dependent T-type calcium channel subunit alpha-1I	CACNA1G;CACNA1H;CACNA1I	NaN	NaN	NaN	NaN	3073700	NaN	NaN	NaN	NaN	46	1	1	1	3.2	3.2	3.2	31.545	1	-2	18442000	3073700	6	1	0	1	0	0	18442000	0	0	3.2	0	0	1	0	0	1	0	0	1	0	AINRVPSMR	tr|I3L2W8|I3L2W8_HUMAN Isoform of O43497, Voltage-dependent T-type calcium channel subunit alpha-1G (Fragment) OS=Homo sapiens OX=9606 GN=CACNA1G PE=4 SV=1;sp|O43497-6|CAC1G_HUMAN Isoform of O43497, Isoform 6 of Voltage-dependent T-type calcium channel sub	766	NaN
173	A0A0B4J1Z1;C9JAB2;Q16629-3;Q16629-2;Q16629-4;Q16629;F8WEA1	A0A0B4J1Z1;C9JAB2;Q16629-3;Q16629-2;Q16629-4;Q16629	Serine/arginine-rich splicing factor 7	SRSF7	151950000	148790000	149900000	41141000	19608000	19521000	NaN	NaN	NaN	7	9	9	8	51.8	51.8	51.8	15.763	0	32.038	792110000	80269000	8	28	9	9	10	376220000	208780000	207120000	43.8	48.9	50.4	7	7	8	7	7	8	6	6	7	AFSYYGPLR;FDRPPAR;GHYAYDCHR;NPPGFAFVEFEDPR;NPPGFAFVEFEDPRDAEDAVR;SRFDRPPAR;VELSTGMPR;VRVELSTGMPR;VYVGNLGTGAGK	tr|A0A0B4J1Z1|A0A0B4J1Z1_HUMAN Isoform of Q16629, Serine/arginine-rich-splicing factor 7 OS=Homo sapiens OX=9606 GN=SRSF7 PE=1 SV=1;tr|C9JAB2|C9JAB2_HUMAN Isoform of Q16629, Serine/arginine-rich-splicing factor 7 OS=Homo sapiens OX=9606 GN=SRSF7 PE=1 SV=1;	526;4521;5774;12424;12426;14762;16620;17562;17970	NaN;NaN;NaN;NaN;NaN;NaN;NaN;NaN;NaN
174	A0A0B4J203;Q6UN15-4;Q6UN15-3;Q6UN15-5;Q6UN15	A0A0B4J203;Q6UN15-4;Q6UN15-3;Q6UN15-5;Q6UN15	Pre-mRNA 3-end-processing factor FIP1	FIP1L1	NaN	NaN	NaN	NaN	NaN	116610	NaN	NaN	NaN	5	1	1	1	1.6	1.6	1.6	94.702	0.0015552	2.4547	5247500	116610	45	1	0	0	1	0	0	5247500	0	0	1.6	0	0	1	0	0	1	0	0	1	MGLEVIPVTSTTNK	tr|A0A0B4J203|A0A0B4J203_HUMAN Uncharacterized protein OS=Homo sapiens OX=9606 PE=3 SV=1;sp|Q6UN15-4|FIP1_HUMAN Isoform of Q6UN15, Isoform 4 of Pre-mRNA 3-end-processing factor FIP1 OS=Homo sapiens OX=9606 GN=FIP1L1;sp|Q6UN15-3|FIP1_HUMAN Isoform of Q6UN1	11536	NaN
175	F5H895;A0A0B4J239;F5GXX5;P61803	F5H895;A0A0B4J239;F5GXX5;P61803	Dolichyl-diphosphooligosaccharide--protein glycosyltransferase subunit DAD1	DAD1	NaN	NaN	NaN	14428000	7578300	NaN	NaN	NaN	NaN	4	1	1	1	18.5	18.5	18.5	7.2883	0	6.5327	44012000	22006000	2	1	1	0	0	28856000	15157000	0	18.5	18.5	0	1	1	0	1	1	0	1	1	0	FLEEYLSSTPQR	tr|F5H895|F5H895_HUMAN Isoform of P61803, Dolichyl-diphosphooligosaccharide--protein glycosyltransferase subunit DAD1 OS=Homo sapiens OX=9606 GN=DAD1 PE=1 SV=1;tr|A0A0B4J239|A0A0B4J239_HUMAN Isoform of P61803, Dolichyl-diphosphooligosaccharide--protein gly	4828	NaN
176	A0A0B4J287;Q9H0A8;H3BM91;H3BPG2;H3BQF2;Q9H0A8-3;Q9H0A8-2	A0A0B4J287;Q9H0A8;H3BM91	COMM domain-containing protein 4	COMMD4	NaN	NaN	NaN	551410	785690	292640	NaN	NaN	NaN	7	3	3	3	27.7	27.7	27.7	19.382	0	7.4557	18143000	292640	10	5	2	2	1	5514100	7856900	4771800	16.9	22.6	16.9	2	2	2	2	2	2	2	2	2	FQVLLAELK;HSVDGESLSSELQQLGLPK;VDYTLSSSLLQSVEEPMVHLR	tr|A0A0B4J287|A0A0B4J287_HUMAN Isoform of Q9H0A8, COMM domain-containing protein 4 OS=Homo sapiens OX=9606 GN=COMMD4 PE=1 SV=1;sp|Q9H0A8|COMD4_HUMAN COMM domain-containing protein 4 OS=Homo sapiens OX=9606 GN=COMMD4 PE=1 SV=1;tr|H3BM91|H3BM91_HUMAN Isoform	5047;6915;16552	NaN;NaN;NaN
177	A0A0B4J2A4;P42765	A0A0B4J2A4;P42765	3-ketoacyl-CoA thiolase, mitochondrial	ACAA2	NaN	NaN	NaN	142420	27904	NaN	NaN	NaN	NaN	2	1	1	1	6.6	6.6	6.6	41.601	0.00043403	3.2437	3576800	170320	21	2	1	1	0	2990800	585980	0	6.6	6.6	0	1	1	0	1	1	0	1	1	0	VSPETVDSVIMGNVLQSSSDAIYLAR	tr|A0A0B4J2A4|A0A0B4J2A4_HUMAN Isoform of P42765, 3-ketoacyl-CoA thiolase, mitochondrial OS=Homo sapiens OX=9606 GN=ACAA2 PE=1 SV=1;sp|P42765|THIM_HUMAN 3-ketoacyl-CoA thiolase, mitochondrial OS=Homo sapiens OX=9606 GN=ACAA2 PE=1 SV=2	17625	NaN
178	K7EM56;A0A0B4J2B4;S4R417;K7ELC2;P62841;K7EQJ5;S4R456;K7EJ78	K7EM56;A0A0B4J2B4;S4R417;K7ELC2;P62841;K7EQJ5	40S ribosomal protein S15	RPS15	53242000	35368000	45151000	8704000	5040800	5993300	NaN	NaN	NaN	8	5	5	5	63.4	63.4	63.4	12.99	0	22.637	223930000	19738000	6	14	5	4	5	126390000	44306000	53235000	52.7	39.3	63.4	3	3	5	3	3	5	3	3	5	DMIILPEMVGSMVGVYNGK;EAPPMEKPEVVK;HGRPGIGATHSSR;PGIGATHSSR;TFNQVEIKPEMIGHYLGEFSITYKPVK	tr|K7EM56|K7EM56_HUMAN Isoform of P62841, 40S ribosomal protein S15 OS=Homo sapiens OX=9606 GN=RPS15 PE=1 SV=2;tr|A0A0B4J2B4|A0A0B4J2B4_HUMAN Isoform of P62841, 40S ribosomal protein S15 OS=Homo sapiens OX=9606 GN=RPS15 PE=1 SV=1;tr|S4R417|S4R417_HUMAN Iso	2684;3207;6697;12738;15363	NaN;NaN;NaN;NaN;NaN
179	Q5W0H4;A0A0B4J2C3;P13693;J3KPG2;E9PJF7;P13693-2;H0YCX0;Q9HAU6	Q5W0H4;A0A0B4J2C3;P13693;J3KPG2;E9PJF7	Translationally-controlled tumor protein	TPT1	151640000	160900000	208240000	47053000	16836000	19247000	NaN	NaN	NaN	8	5	5	5	26.1	26.1	26.1	21.525	0	35.277	878720000	83136000	7	15	6	4	5	448240000	194220000	236260000	26.1	14.4	15.4	5	2	3	5	2	3	5	2	3	DLISHDEMFSDIYK;EDGVTPYMIFFK;EIADGLCLEVEGK;IREIADGLCLEVEGK;LEEQRPER	tr|Q5W0H4|Q5W0H4_HUMAN Isoform of P13693, Translationally-controlled tumor protein OS=Homo sapiens OX=9606 GN=TPT1 PE=1 SV=1;tr|A0A0B4J2C3|A0A0B4J2C3_HUMAN Isoform of P13693, Translationally-controlled tumor protein OS=Homo sapiens OX=9606 GN=TPT1 PE=1 SV=	2570;3286;3604;8099;9360	NaN;NaN;NaN;NaN;NaN
180	A0A0B4J2E5;Q15269	A0A0B4J2E5;Q15269	Periodic tryptophan protein 2 homolog	PWP2	NaN	NaN	NaN	881300	111710	NaN	NaN	NaN	NaN	2	3	2	2	4.4	2.9	2.9	102.45	0	9.8276	38727000	993000	39	3	2	1	0	34371000	4356600	0	4.4	1.7	0	3	1	0	2	1	0	2	1	0	AGTLLPVIQFLQK;LVQEALEAVPR;VLFDPFELDTSVTPGR	tr|A0A0B4J2E5|A0A0B4J2E5_HUMAN Uncharacterized protein OS=Homo sapiens OX=9606 GN=LOC102724159 PE=1 SV=1;sp|Q15269|PWP2_HUMAN Periodic tryptophan protein 2 homolog OS=Homo sapiens OX=9606 GN=PWP2 PE=2 SV=2	625;11202;17104	NaN;NaN;NaN
181	A0A0C4DFL7;Q16850;C9IYR8;H7C0D0;Q16850-2	A0A0C4DFL7;Q16850;C9IYR8;H7C0D0;Q16850-2	Lanosterol 14-alpha demethylase	CYP51A1	NaN	NaN	NaN	62587	113370	NaN	NaN	NaN	NaN	5	2	2	2	5.9	5.9	5.9	57.278	0.0029795	2.1848	4574900	113370	26	1	1	0	0	1627200	2947600	0	3.9	2	0	1	1	0	1	1	0	1	1	0	FAYVPFGAGR;SPPYIFSPIPFLGHAIAFGK	tr|A0A0C4DFL7|A0A0C4DFL7_HUMAN Isoform of Q16850, Lanosterol 14-alpha demethylase OS=Homo sapiens OX=9606 GN=CYP51A1 PE=1 SV=1;sp|Q16850|CP51A_HUMAN Lanosterol 14-alpha demethylase OS=Homo sapiens OX=9606 GN=CYP51A1 PE=1 SV=3;tr|C9IYR8|C9IYR8_HUMAN Isoform	4462;14677	NaN;NaN
182	H0YJN8;G3V267;G3V5T0;A0A0C4DFM0;G3V4T6;O43708-2;O43708	H0YJN8;G3V267;G3V5T0;A0A0C4DFM0;G3V4T6;O43708-2;O43708	Maleylacetoacetate isomerase	GSTZ1	2993800	1531200	1465000	1214900	276160	232170	NaN	NaN	NaN	7	1	1	1	28.6	28.6	28.6	7.5454	0.00043141	3.201	7721700	1723300	2	6	2	2	2	5318900	1262700	1140000	28.6	28.6	28.6	1	1	1	1	1	1	1	1	1	MISDLIAGGIQPLQNLSVLK	tr|H0YJN8|H0YJN8_HUMAN Isoform of O43708, Maleylacetoacetate isomerase (Fragment) OS=Homo sapiens OX=9606 GN=GSTZ1 PE=1 SV=1;tr|G3V267|G3V267_HUMAN Isoform of O43708, Maleylacetoacetate isomerase OS=Homo sapiens OX=9606 GN=GSTZ1 PE=1 SV=1;tr|G3V5T0|G3V5T0_	11578	NaN
183	A0A0C4DFM1;Q92544	A0A0C4DFM1;Q92544	Transmembrane 9 superfamily member 4	TM9SF4	NaN	15297000	15516000	564930	302560	322310	NaN	NaN	NaN	2	3	3	3	6.7	6.7	6.7	72.54	0	9.368	56811000	1189800	22	6	2	2	2	31116000	13137000	12558000	4.5	5.3	5.3	2	2	2	2	2	2	2	2	2	AENLGEVLR;ITEDYYVHLIADNLPVATR;IVNTPFQVLMNSEK	tr|A0A0C4DFM1|A0A0C4DFM1_HUMAN Isoform of Q92544, Transmembrane 9 superfamily member OS=Homo sapiens OX=9606 GN=TM9SF4 PE=1 SV=1;sp|Q92544|TM9S4_HUMAN Transmembrane 9 superfamily member 4 OS=Homo sapiens OX=9606 GN=TM9SF4 PE=1 SV=2	417;8237;8385	NaN;NaN;NaN
184	H7C599;H7C4E0;E7EWX8;A0A0C4DFN3;Q99685-2;Q99685	H7C599;H7C4E0;E7EWX8;A0A0C4DFN3;Q99685-2;Q99685	Monoglyceride lipase	MGLL	11386000	15531000	13122000	2195400	1050900	574780	NaN	NaN	NaN	6	3	3	3	18.8	18.8	18.8	21.452	0	7.3346	48957000	3821100	12	8	2	3	3	26345000	14451000	8160900	18.8	13.7	18.8	3	2	3	3	2	3	3	2	3	GAYLLMELAK;LTVPFLLLQGSADR;VCFGIQLLNAVSR	tr|H7C599|H7C599_HUMAN Isoform of Q99685, Monoglyceride lipase (Fragment) OS=Homo sapiens OX=9606 GN=MGLL PE=1 SV=1;tr|H7C4E0|H7C4E0_HUMAN Isoform of Q99685, Monoglyceride lipase (Fragment) OS=Homo sapiens OX=9606 GN=MGLL PE=1 SV=1;tr|E7EWX8|E7EWX8_HUMAN I	5384;11072;16423	NaN;NaN;NaN
185	H0Y2P2;A0A0C4DFP4;Q96IV0-3;Q96IV0-2;Q96IV0	H0Y2P2;A0A0C4DFP4;Q96IV0-3;Q96IV0-2;Q96IV0	Peptide-N(4)-(N-acetyl-beta-glucosaminyl)asparagine amidase	NGLY1	NaN	NaN	NaN	NaN	443610	321460	NaN	NaN	NaN	5	1	1	1	4.6	4.6	4.6	26.225	0.0065076	1.9044	6120600	765080	8	2	0	1	1	0	3548900	2571700	0	4.6	4.6	0	1	1	0	1	1	0	1	1	LLLTYADNILR	tr|H0Y2P2|H0Y2P2_HUMAN Isoform of Q96IV0, Peptide-N(4)-(N-acetyl-beta-glucosaminyl)asparagine amidase (Fragment) OS=Homo sapiens OX=9606 GN=NGLY1 PE=1 SV=1;tr|A0A0C4DFP4|A0A0C4DFP4_HUMAN Isoform of Q96IV0, Peptide-N(4)-(N-acetyl-beta-glucosaminyl)asparagin	10209	NaN
186	H7C166;B4E2H8;E7EQD7;A0A0C4DFT3;Q12959-8;Q12959-9;Q12959-5;Q12959-3;Q12959-6;Q12959-4;Q12959;Q12959-7;Q12959-2	H7C166;B4E2H8;E7EQD7;A0A0C4DFT3;Q12959-8;Q12959-9;Q12959-5;Q12959-3;Q12959-6;Q12959-4;Q12959;Q12959-7;Q12959-2	Disks large homolog 1	DLG1	NaN	NaN	NaN	1372400	841420	701620	NaN	NaN	NaN	13	1	1	1	7.7	7.7	7.7	30.493	0.00044287	3.4075	26239000	2915400	9	3	1	1	1	12352000	7572700	6314600	7.7	7.7	7.7	1	1	1	1	1	1	1	1	1	LLAVNNVCLEEVTHEEAVTALK	tr|H7C166|H7C166_HUMAN Isoform of Q12959, Disks large homolog 1 (Fragment) OS=Homo sapiens OX=9606 GN=DLG1 PE=1 SV=1;tr|B4E2H8|B4E2H8_HUMAN Isoform of Q12959, cDNA FLJ58166, highly similar to Disks large homolog 1 OS=Homo sapiens OX=9606 GN=DLG1 PE=1 SV=1;	10013	NaN
187	C9J9K3;A0A0C4DG17;P08865;F8WD59	C9J9K3;A0A0C4DG17;P08865	40S ribosomal protein SA	RPSA	274540000	261390000	278500000	99679000	43344000	51277000	NaN	NaN	NaN	4	16	16	16	71.1	71.1	71.1	29.404	0	145.62	3302000000	194300000	13	59	20	18	21	1771500000	705820000	824680000	71.1	55.5	69.6	15	11	14	15	11	14	15	11	14	ADHQPLTEASYVNLPTIALCNTDSPLR;AIVAIENPADVSVISSR;DPEEIEKEEQAAAEK;EHPWEVMPDLYFYR;EHPWEVMPDLYFYRDPEEIEKEEQAAAEK;FAAATGATPIAGR;FLAAGTHLGGTNLDFQMEQYIYK;FTPGTFTNQIQAAFR;FTPGTFTNQIQAAFREPR;GAHSVGLMWWMLAR;KSDGIYIINLK;LLVVTDPR;SDGIYIINLK;SGALDVLQMK;SGALDVLQMKEEDVLK;YVDIAIPCNNK	tr|C9J9K3|C9J9K3_HUMAN Isoform of P08865, 40S ribosomal protein SA (Fragment) OS=Homo sapiens OX=9606 GN=RPSA PE=1 SV=8;tr|A0A0C4DG17|A0A0C4DG17_HUMAN Isoform of P08865, 40S ribosomal protein SA OS=Homo sapiens OX=9606 GN=RPSA PE=1 SV=1;sp|P08865|RSSA_HUMA	278;794;2752;3594;3595;4388;4814;5168;5169;5336;8893;10329;13919;14117;14118;18642	NaN;NaN;NaN;NaN;NaN;NaN;NaN;NaN;NaN;NaN;NaN;NaN;NaN;NaN;NaN;NaN
188	A0A0C4DG83;A2VCS9;E7ETZ8;Q49MG5-2;Q49MG5	A0A0C4DG83;A2VCS9;E7ETZ8;Q49MG5-2;Q49MG5	Microtubule-associated protein 9	MAP9	NaN	NaN	NaN	NaN	NaN	141330	NaN	NaN	NaN	5	1	1	1	2.7	2.7	2.7	41.51	1	-2	2543900	141330	18	0	0	0	0	0	0	2543900	0	0	2.7	0	0	1	0	0	1	0	0	1	TIEDRNIKNK	tr|A0A0C4DG83|A0A0C4DG83_HUMAN Isoform of Q49MG5, Aster-associated protein, isoform CRA_b OS=Homo sapiens OX=9606 GN=MAP9 PE=1 SV=1;tr|A2VCS9|A2VCS9_HUMAN Isoform of Q49MG5, MAP9 protein (Fragment) OS=Homo sapiens OX=9606 GN=MAP9 PE=1 SV=1;tr|E7ETZ8|E7ETZ8	15538	NaN
189	Q7L014;A0A0C4DG89;D6RJA6	Q7L014;A0A0C4DG89;D6RJA6	Probable ATP-dependent RNA helicase DDX46	DDX46	21898000	22744000	23522000	2020400	588240	378590	NaN	NaN	NaN	3	10	10	10	11.9	11.9	11.9	117.36	0	30.775	158320000	2987300	53	12	5	4	3	107080000	31177000	20065000	8	6.6	4	7	5	3	7	5	3	7	5	3	GAEIIVCTPGR;GGTILAPTVSAK;GYAYTFITEDQAR;ISEYSEAAITIR;LLEPVDHGK;LLVATSVAAR;NFYVEVPELAK;SLEEGEGPIAVIMTPTR;TIAFLLPMFR;VVCVYGGTGISEQIAELK	sp|Q7L014|DDX46_HUMAN Probable ATP-dependent RNA helicase DDX46 OS=Homo sapiens OX=9606 GN=DDX46 PE=1 SV=2;tr|A0A0C4DG89|A0A0C4DG89_HUMAN Isoform of Q7L014, Probable ATP-dependent RNA helicase DDX46 OS=Homo sapiens OX=9606 GN=DDX46 PE=1 SV=1;tr|D6RJA6|D6RJ	5316;5732;6499;8128;10081;10311;12062;14405;15513;17789	NaN;NaN;NaN;NaN;NaN;NaN;NaN;NaN;NaN;NaN
190	F8WAW4;F8W6J1;F1LLU7;C9JB63;A0A0C4DGA2;O75521-2;O75521	F8WAW4;F8W6J1;F1LLU7;C9JB63;A0A0C4DGA2;O75521-2;O75521	Enoyl-CoA delta isomerase 2, mitochondrial	ECI2	NaN	NaN	NaN	1713900	406850	NaN	NaN	NaN	NaN	7	1	1	1	8.6	8.6	8.6	15.64	0.002291	2.3332	16966000	2120700	8	2	1	1	0	13711000	3254800	0	8.6	8.6	0	1	1	0	1	1	0	1	1	0	WDAWNALGSLPK	tr|F8WAW4|F8WAW4_HUMAN Isoform of O75521, Enoyl-CoA delta isomerase 2, mitochondrial OS=Homo sapiens OX=9606 GN=ECI2 PE=1 SV=1;tr|F8W6J1|F8W6J1_HUMAN Isoform of O75521, Enoyl-CoA delta isomerase 2, mitochondrial OS=Homo sapiens OX=9606 GN=ECI2 PE=1 SV=1;tr	17986	NaN
191	A0A0C4DGA6;Q14527;Q14527-2	A0A0C4DGA6;Q14527;Q14527-2	Helicase-like transcription factor	HLTF	NaN	NaN	NaN	122720	97420	NaN	NaN	NaN	NaN	3	3	3	3	4.9	4.9	4.9	113.86	0	7.3339	27529000	122720	55	4	3	1	0	22171000	5358100	0	4.9	1.8	0	3	1	0	3	1	0	3	1	0	LSYPTFFPR;QDIVLTTYNILTHDYGTK;TLTAIAVILTNFHDGRPLPIER	tr|A0A0C4DGA6|A0A0C4DGA6_HUMAN Isoform of Q14527, Helicase-like transcription factor OS=Homo sapiens OX=9606 GN=HLTF PE=1 SV=1;sp|Q14527|HLTF_HUMAN Helicase-like transcription factor OS=Homo sapiens OX=9606 GN=HLTF PE=1 SV=2;sp|Q14527-2|HLTF_HUMAN Isoform	10919;12885;15757	NaN;NaN;NaN
192	P20810-6;P20810-7;E7ES10;E7EVY3;B7Z574;P20810-9;A0A0C4DGB5;P20810-10;P20810-4;P20810;P20810-8;E9PDE4;P20810-5;P20810-2;H0Y9H6;E9PCH5;P20810-3;H0Y7F0;E7EQ12;H0YD33;E7EQA0;A0A0A0MR45;F8W7E0;H0YA91;D6RC54;A0A0C4DGD1	P20810-6;P20810-7;E7ES10;E7EVY3;B7Z574;P20810-9;A0A0C4DGB5;P20810-10;P20810-4;P20810;P20810-8;E9PDE4;P20810-5;P20810-2;H0Y9H6;E9PCH5;P20810-3;H0Y7F0;E7EQ12;H0YD33;E7EQA0;A0A0A0MR45	Calpastatin	CAST	32882000	39925000	40574000	1751600	770480	598200	NaN	NaN	NaN	26	7	7	7	16.1	16.1	16.1	84.942	0	49.088	243100000	3120300	39	20	8	7	5	138470000	64056000	40574000	13	9.9	6.8	6	5	3	6	5	3	6	5	3	DTMSDQALEALSASLGTR;GTVPDDAVEALADSLGK;KEGITGPPADSSKPIGPDDAIDALSSDFTCGSPTAAGK;LAAAISEVVSQTPASTTQAGAPPR;SESELIDELSEDFDR;SESELIDELSEDFDRSECK;TEKEESTEVLK	sp|P20810-6|ICAL_HUMAN Isoform of P20810, Isoform 6 of Calpastatin OS=Homo sapiens OX=9606 GN=CAST;sp|P20810-7|ICAL_HUMAN Isoform of P20810, Isoform 7 of Calpastatin OS=Homo sapiens OX=9606 GN=CAST;tr|E7ES10|E7ES10_HUMAN Isoform of P20810, Calpastatin (Fra	2919;6379;8583;8959;14036;14037;15284	NaN;NaN;NaN;NaN;NaN;NaN;NaN
193	A0A0C4DGF0;E7ER77;Q7Z2K6-2;Q7Z2K6	A0A0C4DGF0;E7ER77;Q7Z2K6-2;Q7Z2K6	Endoplasmic reticulum metallopeptidase 1	ERMP1	NaN	NaN	NaN	336780	NaN	NaN	NaN	NaN	NaN	4	1	1	1	6.8	6.8	6.8	39.208	0	6.3267	3367800	336780	10	1	1	0	0	3367800	0	0	6.8	0	0	1	0	0	1	0	0	1	0	0	HPFASVVAQEVFQSGIIPSDTDFR	tr|A0A0C4DGF0|A0A0C4DGF0_HUMAN Isoform of Q7Z2K6, Endoplasmic reticulum metallopeptidase 1 OS=Homo sapiens OX=9606 GN=ERMP1 PE=1 SV=1;tr|E7ER77|E7ER77_HUMAN Isoform of Q7Z2K6, Endoplasmic reticulum metallopeptidase 1 OS=Homo sapiens OX=9606 GN=ERMP1 PE=1 S	6838	NaN
194	A0A2R8Y8C1;A0A2U3TZM0;A0A2R8Y425;A0A2R8YDJ9;A0A2R8YER1;A0A2R8Y4X2;A0A2R8YFK9;A0A2R8YDW2;A0A2R8Y5J0;A0A2R8YD40;A0A2R8YFD8;F5GWX5;A0A2R8Y212;A0A2R8Y521;Q14839;A0A0C4DGG9;Q14839-2;A0A2R8Y8B3;A0A2R8Y5Z7;A0A2R8Y685;Q12873-3;Q12873-2;Q12873;A0A2R8Y5M9;F2Z2R5;K7EMY3;A0A2R8Y7I0;A0A2R8Y7M9;Q8TDI0;A0A2R8YE38	A0A2R8Y8C1;A0A2U3TZM0;A0A2R8Y425;A0A2R8YDJ9;A0A2R8YER1;A0A2R8Y4X2;A0A2R8YFK9;A0A2R8YDW2;A0A2R8Y5J0;A0A2R8YD40;A0A2R8YFD8;F5GWX5;A0A2R8Y212;A0A2R8Y521;Q14839;A0A0C4DGG9;Q14839-2;A0A2R8Y8B3;A0A2R8Y5Z7;A0A2R8Y685	Chromodomain-helicase-DNA-binding protein 4	CHD4	9292200	11671000	11408000	186150	153500	128970	NaN	NaN	NaN	30	5	5	5	3.9	3.9	3.9	189.38	0	12.336	36835000	468620	71	8	4	2	2	16779000	10899000	9156700	3.4	2	2	4	3	3	4	3	3	4	3	3	GGGNQVSLLNVVMDLK;GPFLVSAPLSTIINWER;IGVMSLIR;MLDLLEDFLEHEGYK;VLIFSQMTK	tr|A0A2R8Y8C1|A0A2R8Y8C1_HUMAN Isoform of Q14839, Chromodomain-helicase-DNA-binding protein 4 (Fragment) OS=Homo sapiens OX=9606 GN=CHD4 PE=1 SV=1;tr|A0A2U3TZM0|A0A2U3TZM0_HUMAN Isoform of Q14839, Chromodomain-helicase-DNA-binding protein 4 OS=Homo sapiens	5694;6153;7494;11599;17142	NaN;NaN;NaN;NaN;NaN
195	A0A0C4DGK1;G3XAH6;P51003-2;P51003;G3V3I9;G3V457;H7C3W0;H0YJ00;F8WAT4;Q9NRJ5;Q9BWT3-2;Q9BWT3	A0A0C4DGK1;G3XAH6;P51003-2;P51003;G3V3I9	Poly(A) polymerase alpha	PAPOLA	NaN	NaN	NaN	674840	258820	236340	NaN	NaN	NaN	12	3	3	3	21	21	21	27.056	0	8.0981	36551000	1170000	13	3	1	1	1	19213000	8621800	8715600	13	13	13	2	2	2	2	2	2	2	2	2	GADIDALCVAPR;LALQTIPEDLDLRDDSLLK;LIETLKPFGVFEEEEELQR	tr|A0A0C4DGK1|A0A0C4DGK1_HUMAN Isoform of P51003, Poly(A) polymerase alpha, isoform CRA_e OS=Homo sapiens OX=9606 GN=PAPOLA PE=1 SV=1;tr|G3XAH6|G3XAH6_HUMAN Isoform of P51003, Poly(A) polymerase alpha OS=Homo sapiens OX=9606 GN=PAPOLA PE=1 SV=1;sp|P51003-2	5309;9062;9859	NaN;NaN;NaN
196	K7ELJ7;A0A0C4DGQ5;P04632;A0A075B7C0;K7EKD8;U3KQE2;K7EIV0;K7EM73;K7EMQ1;U3KPR7;K7ES78;Q96L46	K7ELJ7;A0A0C4DGQ5;P04632;A0A075B7C0;K7EKD8;U3KQE2;K7EIV0;K7EM73	Calpain small subunit 1	CAPNS1	123950000	57316000	67552000	15468000	8692700	9095400	NaN	NaN	NaN	12	10	10	10	52.5	52.5	52.5	29.44	0	55.155	511270000	33256000	11	29	14	7	8	297990000	103480000	109800000	48.9	30.2	30.2	9	6	6	9	6	6	9	6	6	ILGGVISAISEAAAQYNPEPPPPR;LFAQLAGDDMEVSATELMNILNK;LGFEEFK;LGFEEFKYLWNNIKR;MFLVNSFLK;RYSDESGNMDFDNFISCLVR;SGTICSSELPGAFEAAGFHLNEHLYNMIIR;TDGFGIDTCR;THYSNIEANESEEVR;YSDESGNMDFDNFISCLVR	tr|K7ELJ7|K7ELJ7_HUMAN Isoform of P04632, Calpain small subunit 1 OS=Homo sapiens OX=9606 GN=CAPNS1 PE=1 SV=1;tr|A0A0C4DGQ5|A0A0C4DGQ5_HUMAN Isoform of P04632, Calpain small subunit 1 OS=Homo sapiens OX=9606 GN=CAPNS1 PE=1 SV=1;sp|P04632|CPNS1_HUMAN Calpai	7744;9472;9642;9643;11510;13788;14186;15217;15509;18570	NaN;NaN;NaN;NaN;NaN;NaN;NaN;NaN;NaN;NaN
197	A0A0C4DGQ6;Q96P16-3;Q96P16;E9PIQ9;K7EP82	A0A0C4DGQ6;Q96P16-3;Q96P16	Regulation of nuclear pre-mRNA domain-containing protein 1A	RPRD1A	22255000	26241000	24935000	3457500	2032600	1226900	NaN	NaN	NaN	5	5	3	3	19.4	13.5	13.5	32.916	0	8.1801	107470000	6716900	16	9	3	3	3	55320000	32521000	19630000	19	19	19.4	4	4	5	3	3	3	3	3	3	DFAPVIVEAFK;IASLPVEVQEVSLLDK;KLTFLYLANDVIQNSK;KLTFLYLANDVIQNSKR;SVYENDVLEQLK	tr|A0A0C4DGQ6|A0A0C4DGQ6_HUMAN Isoform of Q96P16, Regulation of nuclear pre-mRNA domain-containing protein 1A OS=Homo sapiens OX=9606 GN=RPRD1A PE=1 SV=1;sp|Q96P16-3|RPR1A_HUMAN Isoform of Q96P16, Isoform 2 of Regulation of nuclear pre-mRNA domain-containi	2156;7084;8790;8791;15015	NaN;NaN;NaN;NaN;NaN
198	A0A0C4DGS1;P39656;P39656-2;P39656-3;U3KQ84	A0A0C4DGS1;P39656;P39656-2;P39656-3	Dolichyl-diphosphooligosaccharide--protein glycosyltransferase 48 kDa subunit	DDOST	124780000	141060000	131270000	9959100	9087100	7331900	NaN	NaN	NaN	5	11	11	11	36.2	36.2	36.2	48.799	0	55.351	669180000	26378000	23	22	9	7	6	267610000	222200000	179370000	31.7	23.7	26.2	9	8	9	9	8	9	9	8	9	ELGSECGIEFDEEK;GFELTFK;LPDVYGVFQFK;NTLLIAGLQAR;SSLNPILFR;TAVIDHHNYDISDLGQHTLIVADTENLLK;TLVLLDNLNVR;VGETAPPNAYTVTDLVEYSIVIQQLSNGK;VGPVSHHR;WVPFDGDDIQLEFVR;YSQTGNYELAVALSR	tr|A0A0C4DGS1|A0A0C4DGS1_HUMAN Isoform of P39656, Dolichyl-diphosphooligosaccharide--protein glycosyltransferase 48 kDa subunit OS=Homo sapiens OX=9606 GN=DDOST PE=1 SV=1;sp|P39656|OST48_HUMAN Dolichyl-diphosphooligosaccharide--protein glycosyltransferase	3782;5583;10490;12534;14818;15160;15774;16787;16832;18080;18593	NaN;NaN;NaN;NaN;NaN;NaN;NaN;NaN;NaN;NaN;NaN
199	A0A0C4DGU7;Q8N9Z2;Q8N9Z2-2	A0A0C4DGU7;Q8N9Z2;Q8N9Z2-2	Coiled-coil domain-containing protein 71L	CCDC71L	NaN	NaN	NaN	NaN	NaN	NaN	NaN	NaN	NaN	3	1	1	1	2.8	2.8	2.8	33.753	1	-2	0	0	18	1	1	0	0	0	0	0	2.8	0	0	1	0	0	1	0	0	1	0	0	HQFSPHILR	tr|A0A0C4DGU7|A0A0C4DGU7_HUMAN Isoform of Q8N9Z2, Coiled-coil domain-containing protein 71L OS=Homo sapiens OX=9606 GN=CCDC71L PE=1 SV=1;sp|Q8N9Z2|CC71L_HUMAN Coiled-coil domain-containing protein 71L OS=Homo sapiens OX=9606 GN=CCDC71L PE=1 SV=2;sp|Q8N9Z2-	6862	NaN
200	A0A0C4DGW6;A6NDU8	A0A0C4DGW6;A6NDU8	UPF0600 protein C5orf51	C5orf51	NaN	NaN	NaN	1208300	463280	366090	NaN	NaN	NaN	2	1	1	1	9.2	9.2	9.2	16.961	0.0011825	2.5213	16302000	2037700	8	3	1	1	1	9666600	3706300	2928700	9.2	9.2	9.2	1	1	1	1	1	1	1	1	1	ELISFLSEPEILVK	tr|A0A0C4DGW6|A0A0C4DGW6_HUMAN Isoform of A6NDU8, UPF0600 protein C5orf51 OS=Homo sapiens OX=9606 GN=C5orf51 PE=1 SV=1;sp|A6NDU8|CE051_HUMAN UPF0600 protein C5orf51 OS=Homo sapiens OX=9606 GN=C5orf51 PE=1 SV=1	3796	NaN
201	A0A0C4DGX4;Q13616	A0A0C4DGX4;Q13616	Cullin-1	CUL1	15175000	15433000	10843000	294260	247310	186640	NaN	NaN	NaN	2	5	5	5	10.9	10.9	10.9	87.387	0	17.989	55100000	728200	44	10	3	3	4	22680000	16781000	15639000	6.1	5.3	8.4	3	3	4	3	3	4	3	3	4	ESFESQFLADTER;HQQLLGEVLTQLSSR;LLVLEDENANVDEVELKPDTLIK;NPEEAELEDTLNQVMVVFK;QIGLDQIWDDLR	tr|A0A0C4DGX4|A0A0C4DGX4_HUMAN Isoform of Q13616, Cullin-1 OS=Homo sapiens OX=9606 GN=CUL1 PE=1 SV=1;sp|Q13616|CUL1_HUMAN Cullin-1 OS=Homo sapiens OX=9606 GN=CUL1 PE=1 SV=2	4116;6873;10319;12400;13035	NaN;NaN;NaN;NaN;NaN
202	A0A0C4DGY8;D6RA00;Q9UHY7;Q9UHY7-2	A0A0C4DGY8;D6RA00;Q9UHY7;Q9UHY7-2	Enolase-phosphatase E1	ENOPH1	NaN	19857000	19136000	795460	1024800	913990	NaN	NaN	NaN	4	2	2	2	22.8	22.8	22.8	16.533	0	7.2211	27543000	1938800	9	5	1	2	2	7159100	10760000	9623900	14.8	22.8	22.8	1	2	2	1	2	2	1	2	2	AEFFADVVPAVR;LLFGHSTEGDILELVDGHFDTK	tr|A0A0C4DGY8|A0A0C4DGY8_HUMAN Isoform of Q9UHY7, Enolase-phosphatase E1 OS=Homo sapiens OX=9606 GN=ENOPH1 PE=1 SV=1;tr|D6RA00|D6RA00_HUMAN Isoform of Q9UHY7, Enolase-phosphatase E1 OS=Homo sapiens OX=9606 GN=ENOPH1 PE=1 SV=1;sp|Q9UHY7|ENOPH_HUMAN Enolase-	371;10108	NaN;NaN
203	A0A0D9SEN2;Q9UQ88-4;Q5QPR4;Q5QPR3;A0A0D9SEI3;P21127-8;Q9UQ88;P21127-2;P21127-3;Q9UQ88-2;A0A0D9SER5;Q9UQ88-3;Q9UQ88-5;P21127-9;P21127-6;P21127-10;P21127-5;P21127-4;Q9UQ88-10;P21127-12;P21127;Q9UQ88-9;Q9UQ88-8	A0A0D9SEN2;Q9UQ88-4;Q5QPR4;Q5QPR3;A0A0D9SEI3;P21127-8;Q9UQ88;P21127-2;P21127-3;Q9UQ88-2;A0A0D9SER5;Q9UQ88-3;Q9UQ88-5;P21127-9;P21127-6;P21127-10;P21127-5;P21127-4;Q9UQ88-10;P21127-12;P21127;Q9UQ88-9	Cyclin-dependent kinase 11A;Cyclin-dependent kinase 11B	CDK11B;CDK11A	NaN	NaN	NaN	265450	19957	25306	NaN	NaN	NaN	23	3	3	3	5.1	5.1	5.1	90.625	0	7.619	19065000	310710	41	5	1	2	2	10883000	818250	7363000	3.8	3.4	3.8	2	2	2	2	2	2	2	2	2	ETPLPIDPSMFPTWPAK;SVEEFQCLNR;TSNLLLSHAGILK	tr|A0A0D9SEN2|A0A0D9SEN2_HUMAN Isoform of P21127, Cyclin-dependent kinase 11B OS=Homo sapiens OX=9606 GN=CDK11B PE=1 SV=1;sp|Q9UQ88-4|CD11A_HUMAN Isoform of Q9UQ88, Isoform SV3 of Cyclin-dependent kinase 11A OS=Homo sapiens OX=9606 GN=CDK11A;tr|Q5QPR4|Q5QP	4216;14934;15997	NaN;NaN;NaN
204	Q5T321;A0A0D9SF28;F5GXV7;Q8NFP9	Q5T321;A0A0D9SF28;F5GXV7;Q8NFP9	Neurobeachin	NBEA	NaN	NaN	NaN	10130	NaN	NaN	NaN	NaN	NaN	4	1	1	1	0.3	0.3	0.3	327.55	1	-2	1478900	10130	146	0	0	0	0	1478900	0	0	0.3	0	0	1	0	0	1	0	0	1	0	0	ITEMVYNIFR	tr|Q5T321|Q5T321_HUMAN Isoform of Q8NFP9, Neurobeachin, isoform CRA_e OS=Homo sapiens OX=9606 GN=NBEA PE=1 SV=1;tr|A0A0D9SF28|A0A0D9SF28_HUMAN Isoform of Q8NFP9, Neurobeachin OS=Homo sapiens OX=9606 GN=NBEA PE=1 SV=1;tr|F5GXV7|F5GXV7_HUMAN Isoform of Q8NFP	8240	NaN
205	A0A2R8YCW1;A0A2R8YFS5;A0A2R8YFR4;A0A0D9SG12;A0A0D9SFB3;A0A2U3TZJ9;A0A0D9SF53;A0A2R8YF78;O00571;A0A2R8Y4A4;A0A2R8Y645;O00571-2;A0A2R8Y5G6;F6S8Q4;A0A2R8Y7T2;A0A2R8YDT5;A0A2R8YDH3;A0A0J9YVQ7;A0A087WVZ1;O15523-3;A0A2R8YCU0;A0A2R8Y650;C9J8G5;C9J081;A0A2R8YF89;A0A087WX09;A0A2R8Y770;A0A2R8Y4D2;D6RCM4;Q9NQI0-3;Q9NQI0-2;Q9NQI0-4;Q9NQI0	A0A2R8YCW1;A0A2R8YFS5;A0A2R8YFR4;A0A0D9SG12;A0A0D9SFB3;A0A2U3TZJ9;A0A0D9SF53;A0A2R8YF78;O00571;A0A2R8Y4A4;A0A2R8Y645;O00571-2;A0A2R8Y5G6;F6S8Q4;A0A2R8Y7T2;A0A2R8YDT5;A0A2R8YDH3	ATP-dependent RNA helicase DDX3X	DDX3X	102370000	91424000	91652000	17010000	6164000	6376100	NaN	NaN	NaN	33	23	22	6	43.7	42	11.1	71.693	0	103.08	1659500000	29550000	40	66	24	22	20	929220000	368300000	362030000	37.2	36.8	34.6	20	18	18	19	17	17	4	5	5	DLLDLLVEAK;DREEALHQFR;ELAVQIYEEAR;FSGGFGAR;GCHLLVATPGR;GLDISNVK;HAIPIIK;HTMMFSATFPK;HVINFDLPSDIEEYVHR;KGADSLEDFLYHEGYACTSIHGDR;LEQELFSGGNTGINFEK;MLDMGFEPQIR;QEVPSWLENMAYEHHYK;QYPISLVLAPTR;SDYDGIGSR;SFLLDLLNATGK;SPILVATAVAAR;SSFFSDR;TAAFLLPILSQIYSDGPGEALR;VGNLGLATSFFNER;VRPCVVYGGADIGQQIR;YIPPHLR;YLVLDEADR	tr|A0A2R8YCW1|A0A2R8YCW1_HUMAN Isoform of O00571, ATP-dependent RNA helicase DDX3X OS=Homo sapiens OX=9606 GN=DDX3X PE=1 SV=1;tr|A0A2R8YFS5|A0A2R8YFS5_HUMAN Isoform of O00571, ATP-dependent RNA helicase DDX3X OS=Homo sapiens OX=9606 GN=DDX3X PE=1 SV=1;tr|A	2582;2826;3725;5086;5389;5916;6562;6936;6956;8648;9429;11600;12943;13395;13967;14087;14666;14786;15087;16825;17557;18374;18474	NaN;NaN;NaN;NaN;NaN;NaN;NaN;NaN;NaN;NaN;NaN;NaN;NaN;NaN;NaN;NaN;NaN;NaN;NaN;NaN;NaN;NaN;NaN
206	E9PMR9;B0QYV9;G5E9L0;A0A0D9SF70;E9PIY6;E9PQP3;E9PN48;E9PK28;E9PJT7;E9PMU9;B0QYV8;H0YDX1;E9PNY8;E9PM63;Q9NP61-2;Q9NP61;Q8N6H7	E9PMR9;B0QYV9;G5E9L0;A0A0D9SF70;E9PIY6;E9PQP3;E9PN48;E9PK28;E9PJT7;E9PMU9;B0QYV8;H0YDX1;E9PNY8;E9PM63;Q9NP61-2;Q9NP61;Q8N6H7	ADP-ribosylation factor GTPase-activating protein 3;ADP-ribosylation factor GTPase-activating protein 2	ARFGAP2;ARFGAP3	NaN	NaN	NaN	1571900	NaN	NaN	NaN	NaN	NaN	17	1	1	1	11.2	11.2	11.2	9.9092	0.0029884	2.2045	11004000	1571900	7	1	1	0	0	11004000	0	0	11.2	0	0	1	0	0	1	0	0	1	0	0	SLGVHLSFIR	tr|E9PMR9|E9PMR9_HUMAN Isoform of Q8N6H7, ADP-ribosylation factor GTPase-activating protein 2 OS=Homo sapiens OX=9606 GN=ARFGAP2 PE=1 SV=1;tr|B0QYV9|B0QYV9_HUMAN Isoform of Q9NP61, ADP-ribosylation factor GTPase-activating protein 3 (Fragment) OS=Homo sapi	14442	NaN
207	A0A0U1RQP1;A0A0D9SFE4;Q05193-3;Q05193;A0A0D9SFB1;Q05193-5;Q05193-2;A0A1B0GU67;A0A1B0GUX5	A0A0U1RQP1;A0A0D9SFE4;Q05193-3;Q05193;A0A0D9SFB1;Q05193-5;Q05193-2;A0A1B0GU67;A0A1B0GUX5	Dynamin-1	DNM1	NaN	NaN	NaN	130090	NaN	65472	NaN	NaN	NaN	9	9	4	3	12.4	7.5	5.6	96.396	0	5.7734	16608000	195570	46	3	2	0	1	13597000	0	3011700	8.9	2	4.3	6	2	4	3	0	1	2	0	1	ALLQMVQQFAVDFEKR;FPFELVK;GISPVPINLR;GYIGVVNR;NLVDSYMAIVNK;RPLVLQLVNATTEYAEFLHCK;SSVLENFVGR;TGLFTPDMAFETIVK;TIGVITK	tr|A0A0U1RQP1|A0A0U1RQP1_HUMAN Isoform of Q05193, Dynamin-1 OS=Homo sapiens OX=9606 GN=DNM1 PE=1 SV=1;tr|A0A0D9SFE4|A0A0D9SFE4_HUMAN Isoform of Q05193, Dynamin-1 OS=Homo sapiens OX=9606 GN=DNM1 PE=1 SV=1;sp|Q05193-3|DYN1_HUMAN Isoform of Q05193, Isoform 3	976;4985;5860;6522;12324;13683;14846;15434;15553	NaN;NaN;NaN;NaN;NaN;NaN;NaN;NaN;NaN
208	A0A0D9SFK2;Q92614-5;Q92614-2;Q92614-3;Q92614-4;Q92614	A0A0D9SFK2;Q92614-5;Q92614-2;Q92614-3;Q92614-4;Q92614	Unconventional myosin-XVIIIa	MYO18A	NaN	NaN	NaN	37196	20372	18164	NaN	NaN	NaN	6	2	2	2	1.1	1.1	1.1	231.1	0.00043554	3.2597	12118000	37196	101	4	2	1	1	8226200	2057600	1834600	1.1	0.7	0.7	2	1	1	2	1	1	2	1	1	ALLADAQLMLDHLK;IISNLFLGR	tr|A0A0D9SFK2|A0A0D9SFK2_HUMAN Isoform of Q92614, Unconventional myosin-XVIIIa OS=Homo sapiens OX=9606 GN=MYO18A PE=1 SV=1;sp|Q92614-5|MY18A_HUMAN Isoform of Q92614, Isoform 5 of Unconventional myosin-XVIIIa OS=Homo sapiens OX=9606 GN=MYO18A;sp|Q92614-2|MY	952;7640	NaN;NaN
209	H7BY36;A0A0D9SFL3;B0QYK0;C9JGE3;Q01844-2;Q01844-6;Q01844-3;Q01844;Q01844-5	H7BY36;A0A0D9SFL3;B0QYK0;C9JGE3;Q01844-2;Q01844-6;Q01844-3;Q01844;Q01844-5	RNA-binding protein EWS	EWSR1	44019000	41802000	NaN	5546100	2415500	950750	NaN	NaN	NaN	9	2	2	2	7.5	7.5	7.5	32.071	0	4.742	124770000	8912400	14	6	2	2	2	77646000	33817000	13310000	7.5	7.5	7.5	2	2	2	2	2	2	2	2	2	AAVEWFDGK;GDATVSYEDPPTAK	tr|H7BY36|H7BY36_HUMAN Isoform of Q01844, RNA-binding protein EWS (Fragment) OS=Homo sapiens OX=9606 GN=EWSR1 PE=1 SV=1;tr|A0A0D9SFL3|A0A0D9SFL3_HUMAN Isoform of Q01844, RNA-binding protein EWS OS=Homo sapiens OX=9606 GN=EWSR1 PE=1 SV=1;tr|B0QYK0|B0QYK0_HU	188;5403	NaN;NaN
210	A0A0X1KG75;A0A0D9SG04;Q53SF7-4;Q53SF7-3;Q53SF7-2;Q53SF7	A0A0X1KG75;A0A0D9SG04;Q53SF7-4;Q53SF7-3;Q53SF7-2;Q53SF7	Cordon-bleu protein-like 1	COBLL1	NaN	NaN	NaN	NaN	169520	NaN	NaN	NaN	NaN	6	1	1	1	1.3	1.3	1.3	127.83	1	-2	11358000	169520	67	1	0	1	0	0	11358000	0	0	1.3	0	0	1	0	0	1	0	0	1	0	VTIPSNTISVNGRSR	tr|A0A0X1KG75|A0A0X1KG75_HUMAN Isoform of Q53SF7, Cordon-bleu protein-like 1 (Fragment) OS=Homo sapiens OX=9606 GN=COBLL1 PE=1 SV=1;tr|A0A0D9SG04|A0A0D9SG04_HUMAN Isoform of Q53SF7, Cordon-bleu protein-like 1 OS=Homo sapiens OX=9606 GN=COBLL1 PE=1 SV=2;sp|	17699	NaN
211	A0A1B0GW76;A0A1B0GWF2;A0A1B0GVQ5;A0A2R8Y5D4;A0A0D9SG72;A0A1B0GTP9;P61764;P61764-2;A0A0D9SEP9;A0A0D9SEH5;A0A0D9SFQ7;A0A0D9SFW6	A0A1B0GW76;A0A1B0GWF2;A0A1B0GVQ5;A0A2R8Y5D4;A0A0D9SG72;A0A1B0GTP9;P61764;P61764-2;A0A0D9SEP9;A0A0D9SEH5;A0A0D9SFQ7;A0A0D9SFW6	Syntaxin-binding protein 1	STXBP1	NaN	NaN	NaN	335440	52025	383030	NaN	NaN	NaN	12	4	4	4	15.6	15.6	15.6	41.265	0	6.643	19800000	718480	17	4	0	1	3	11351000	884420	7563800	8.3	5	10.6	2	1	3	2	1	3	2	1	3	DNALLAQLIQDK;MTDIMTEGITIVEDINKR;REPLPSLEAVYLITPSEK;SQLLILDR	tr|A0A1B0GW76|A0A1B0GW76_HUMAN Isoform of P61764, Syntaxin-binding protein 1 OS=Homo sapiens OX=9606 GN=STXBP1 PE=1 SV=1;tr|A0A1B0GWF2|A0A1B0GWF2_HUMAN Isoform of P61764, Syntaxin-binding protein 1 OS=Homo sapiens OX=9606 GN=STXBP1 PE=1 SV=1;tr|A0A1B0GVQ5|	2701;11761;13479;14731	NaN;NaN;NaN;NaN
212	A0A0D9SG77;A0A1B0GVL3;Q05086-2;Q05086-3;Q05086	A0A0D9SG77;A0A1B0GVL3;Q05086-2;Q05086-3;Q05086	Ubiquitin-protein ligase E3A	UBE3A	NaN	NaN	NaN	533600	NaN	NaN	NaN	NaN	NaN	5	2	2	2	3.1	3.1	3.1	88.082	0.00046555	3.8564	18676000	533600	35	2	2	0	0	18676000	0	0	3.1	0	0	2	0	0	2	0	0	2	0	0	EFVNLYSDYILNK;VDPLETELGVK	tr|A0A0D9SG77|A0A0D9SG77_HUMAN Isoform of Q05086, Ubiquitin-protein ligase E3A OS=Homo sapiens OX=9606 GN=UBE3A PE=1 SV=1;tr|A0A1B0GVL3|A0A1B0GVL3_HUMAN Isoform of Q05086, Ubiquitin-protein ligase E3A OS=Homo sapiens OX=9606 GN=UBE3A PE=1 SV=1;sp|Q05086-2|	3469;16521	NaN;NaN
213	E5RG62;E5RK70;H0YBX2;G5EA19;U3KQS5;E5RGF2;A0A0D9SGD3;E5RG17;Q6P1N9-2;Q6P1N9	E5RG62;E5RK70;H0YBX2;G5EA19;U3KQS5;E5RGF2;A0A0D9SGD3;E5RG17;Q6P1N9-2;Q6P1N9	Putative deoxyribonuclease TATDN1	TATDN1	NaN	NaN	NaN	5430300	1532100	NaN	NaN	NaN	NaN	10	2	2	2	24.7	24.7	24.7	10.862	0	4.4352	41774000	6962400	6	2	1	1	0	32582000	9192400	0	24.7	14	0	2	1	0	2	1	0	2	1	0	ELLNLAENNK;VVAIGECGLDFDR	tr|E5RG62|E5RG62_HUMAN Isoform of Q6P1N9, Putative deoxyribonuclease TATDN1 (Fragment) OS=Homo sapiens OX=9606 GN=TATDN1 PE=1 SV=1;tr|E5RK70|E5RK70_HUMAN Isoform of Q6P1N9, Putative deoxyribonuclease TATDN1 (Fragment) OS=Homo sapiens OX=9606 GN=TATDN1 PE=1	3826;17782	NaN;NaN
214	A0A140T8Z0;A0A0G2JH68;O60610-2;O60610-3;O60610;H9KV28;A0A2R8Y5N1;B4E2I7;H7C2W8;A0A2R8YEF8	A0A140T8Z0;A0A0G2JH68;O60610-2;O60610-3;O60610;H9KV28;A0A2R8Y5N1	Protein diaphanous homolog 1	DIAPH1	41202000	36192000	31965000	2061000	1377600	953340	NaN	NaN	NaN	10	12	12	12	12.5	12.5	12.5	140.3	0	71.749	314340000	4392000	59	28	12	9	7	166130000	91964000	56247000	10.8	8.6	6.7	10	9	7	10	9	7	10	9	7	DMPLLSCLESLR;FQPLLDGLK;HLQIEIEGLIDQMIDK;LGLHQVLQDLR;LIEECISQIVLHK;LNAILFK;LVAEDLSQDCFWTK;NSETFPTILEEAK;QDLEAEVSQLTGEVAK;SPDELPSAGGDGGK;TAQNLSIFLGSFR;VGCLQLINALITPAEELDFR	tr|A0A140T8Z0|A0A140T8Z0_HUMAN Isoform of O60610, Protein diaphanous homolog 1 OS=Homo sapiens OX=9606 GN=DIAPH1 PE=1 SV=1;tr|A0A0G2JH68|A0A0G2JH68_HUMAN Isoform of O60610, Protein diaphanous homolog 1 OS=Homo sapiens OX=9606 GN=DIAPH1 PE=1 SV=1;sp|O60610-	2691;5030;6785;9698;9853;10381;11078;12480;12886;14647;15136;16769	NaN;NaN;NaN;NaN;NaN;NaN;NaN;NaN;NaN;NaN;NaN;NaN
215	A0A0G2JIW1;P0DMV9;P0DMV8;P0DMV8-2;V9GZ37	A0A0G2JIW1;P0DMV9;P0DMV8;P0DMV8-2;V9GZ37	Heat shock 70 kDa protein 1B;Heat shock 70 kDa protein 1A	HSPA1B;HSPA1A	222110000	200240000	210640000	44533000	16427000	16941000	NaN	NaN	NaN	5	28	25	14	59.3	55.9	33.6	70.108	0	193.31	3550100000	77901000	32	95	38	28	29	2018100000	748270000	783740000	57.2	41.1	46	27	21	23	24	19	20	13	10	10	AAAIGIDLGTTYSCVGVFQHGK;AFYPEEISSMVLTK;AQIHDLVLVGGSTR;ARFEELCSDLFR;ATAGDTHLGGEDFDNR;CQEVISWLDANTLAEK;CQEVISWLDANTLAEKDEFEHK;DAGVIAGLNVLR;DNNLLGR;EIAEAYLGYPVTNAVITVPAYFNDSQR;ELEQVCNPIISGLYQGAGGPGPGGFGAQGPK;FEELCSDLFR;FGDPVVQSDMK;HWPFQVINDGDKPK;IINEPTAAAIAYGLDR;ITITNDK;ITITNDKGR;LLQDFFNGR;LVNHFVEEFK;LVNHFVEEFKR;NALESYAFNMK;NQVALNPQNTVFDAK;QTQIFTTYSDNQPGVLIQVYEGER;SAVEDEGLK;SENVQDLLLLDVAPLSLGLETAGGVM…	tr|A0A0G2JIW1|A0A0G2JIW1_HUMAN Isoform of P0DMV9, Heat shock 70 kDa protein 1B OS=Homo sapiens OX=9606 GN=HSPA1B PE=1 SV=1;sp|P0DMV9|HS71B_HUMAN Heat shock 70 kDa protein 1B OS=Homo sapiens OX=9606 GN=HSPA1B PE=1 SV=1;sp|P0DMV8|HS71A_HUMAN Heat shock 70 kD	24;540;1281;1344;1454;1903;1904;2002;2725;3607;3755;4546;4640;6986;7614;8264;8265;10256;11177;11178;11873;12459;13310;13855;14030;14297;14882;16066	NaN;NaN;NaN;NaN;NaN;NaN;NaN;NaN;NaN;NaN;NaN;NaN;NaN;NaN;NaN;NaN;NaN;NaN;NaN;NaN;NaN;NaN;NaN;NaN;NaN;NaN;NaN;NaN
216	A2ACR1;A0A0G2JJA7;P28065-2;P28065	A2ACR1;A0A0G2JJA7;P28065-2;P28065	Proteasome subunit beta type;Proteasome subunit beta type-9	PSMB9	NaN	NaN	NaN	572270	306790	429980	NaN	NaN	NaN	4	2	2	2	16.8	16.8	16.8	20.96	0.0004386	3.3282	20723000	1002300	10	3	1	1	1	11750000	3067900	5905600	16.8	10.7	16.8	2	1	2	2	1	2	2	1	2	DGSSGGVIYLVTITAAGVDHR;FTTDAIALAMSR	tr|A2ACR1|A2ACR1_HUMAN Isoform of P28065, Proteasome subunit beta type OS=Homo sapiens OX=9606 GN=PSMB9 PE=1 SV=1;tr|A0A0G2JJA7|A0A0G2JJA7_HUMAN Isoform of P28065, Proteasome subunit beta type OS=Homo sapiens OX=9606 GN=PSMB9 PE=1 SV=1;sp|P28065-2|PSB9_HUM	2300;5173	NaN;NaN
217	F5GXS0;A0A140TA49;A0A140TA44;A0A140TA32;A0A140TA29;A0A0G2JL54;A0A0G2JPR0;P0C0L4-2;P0C0L5;P0C0L4	F5GXS0;A0A140TA49;A0A140TA44;A0A140TA32;A0A140TA29;A0A0G2JL54;A0A0G2JPR0;P0C0L4-2;P0C0L5;P0C0L4	Complement C4-A;Complement C4 beta chain;Complement C4-A alpha chain;C4a anaphylatoxin;C4b-A;C4d-A;Complement C4 gamma chain;Complement C4-B;Complement C4 beta chain;Complement C4-B alpha chain;C4a anaphylatoxin;C4b-B;C4d-B;Complement C4 gamma chain	C4B;C4A	NaN	NaN	NaN	137840	NaN	NaN	NaN	NaN	NaN	10	1	1	1	0.7	0.7	0.7	187.67	1	-2	10751000	137840	78	0	0	0	0	10751000	0	0	0.7	0	0	1	0	0	1	0	0	1	0	0	KADGSYAAWLSR	tr|F5GXS0|F5GXS0_HUMAN Isoform of P0C0L5, Complement C4-B OS=Homo sapiens OX=9606 GN=C4B PE=1 SV=1;tr|A0A140TA49|A0A140TA49_HUMAN Isoform of P0C0L4, Complement C4-A OS=Homo sapiens OX=9606 GN=C4A PE=1 SV=1;tr|A0A140TA44|A0A140TA44_HUMAN Isoform of P0C0L4,	8484	NaN
218	Q53GD3-3;A0A0G2JL76	Q53GD3-3;A0A0G2JL76			NaN	NaN	NaN	1013800	NaN	NaN	NaN	NaN	NaN	2	1	1	1	1.1	1.1	1.1	70.761	0.0078431	1.8052	16222000	1013800	16	1	1	0	0	16222000	0	0	1.1	0	0	1	0	0	1	0	0	1	0	0	MGENKDK	sp|Q53GD3-3|CTL4_HUMAN Isoform of Q53GD3, Isoform 3 of Choline transporter-like protein 4 OS=Homo sapiens OX=9606 GN=SLC44A4;tr|A0A0G2JL76|A0A0G2JL76_HUMAN Isoform of Q53GD3, Choline transporter-like protein 4 OS=Homo sapiens OX=9606 GN=SLC44A4 PE=1 SV=1	11524	NaN
219	A0A0G2JNZ5;A0A0G2JLB3;P04062-4;P04062-2;P04062;A0A0G2JNZ0;P04062-5;P04062-3	A0A0G2JNZ5;A0A0G2JLB3;P04062-4;P04062-2;P04062;A0A0G2JNZ0;P04062-5	Glucosylceramidase	GBA	NaN	NaN	NaN	356080	329960	247160	NaN	NaN	NaN	8	3	3	3	14	14	14	50.263	0	5.6774	23330000	577120	25	5	3	1	1	8902000	8249000	6178900	11.1	2.9	2.9	2	1	1	2	1	1	2	1	1	ALQLAQRPVSLLASPWTSPTWLK;GFGGAMTDAAALNILALSPPAQNLLLK;NFVDSPIIVDITK	tr|A0A0G2JNZ5|A0A0G2JNZ5_HUMAN Isoform of P04062, Glucosylceramidase OS=Homo sapiens OX=9606 GN=GBA PE=1 SV=1;tr|A0A0G2JLB3|A0A0G2JLB3_HUMAN Isoform of P04062, Glucosylceramidase OS=Homo sapiens OX=9606 GN=GBA PE=1 SV=1;sp|P04062-4|GLCM_HUMAN Isoform of P0	1020;5612;12054	NaN;NaN;NaN
220	B0V3J0;A9C4B9;A0A0G2JNK5;E7EQB3;Q9BSV6	B0V3J0;A9C4B9;A0A0G2JNK5;E7EQB3;Q9BSV6	tRNA-splicing endonuclease subunit Sen34	TSEN34	NaN	NaN	NaN	NaN	NaN	359770	NaN	NaN	NaN	5	2	2	2	10.7	10.7	10.7	26.101	0.00046104	3.7382	4317300	359770	12	2	0	0	2	0	0	4317300	0	0	10.7	0	0	2	0	0	2	0	0	2	LGLPLLLMPEEAR;SLVWGAEAVQALR	tr|B0V3J0|B0V3J0_HUMAN Isoform of Q9BSV6, tRNA-splicing endonuclease subunit Sen34 (Fragment) OS=Homo sapiens OX=9606 GN=TSEN34 PE=1 SV=1;tr|A9C4B9|A9C4B9_HUMAN Isoform of Q9BSV6, tRNA-splicing endonuclease subunit Sen34 (Fragment) OS=Homo sapiens OX=9606	9705;14559	NaN;NaN
221	A0A0G2JNZ2;A0A0G2JPP5;Q14160;Q14160-3;A0A0G2JMS7;Q14160-2;H0YCG0	A0A0G2JNZ2;A0A0G2JPP5;Q14160;Q14160-3;A0A0G2JMS7;Q14160-2	Protein scribble homolog	SCRIB	NaN	NaN	NaN	97945	9636	21691	NaN	NaN	NaN	7	3	3	2	3.4	3.4	2.6	174.91	0	7.1609	9824700	129270	76	4	2	1	1	7443800	732340	1648500	2.6	1.3	0.8	2	1	1	2	1	1	2	1	0	HDHAVSLLTAASPTIALLLER;LLEVNQQSLLGLTHGEAVQLLR;SLEELLLDANQLR	tr|A0A0G2JNZ2|A0A0G2JNZ2_HUMAN Isoform of Q14160, Protein scribble homolog OS=Homo sapiens OX=9606 GN=SCRIB PE=1 SV=1;tr|A0A0G2JPP5|A0A0G2JPP5_HUMAN Isoform of Q14160, Protein scribble homolog OS=Homo sapiens OX=9606 GN=SCRIB PE=1 SV=1;sp|Q14160|SCRIB_HUMA	6587;10101;14407	NaN;NaN;NaN
222	A0A1W2PRN1;A0A1W2PQV4;H3BPF8;H3BQL2;A0A1B0GVY7;H3BMC3;A0A0G2JPF6;H3BSY2-2;A6NN73;D6RF30;H3BSY2;A6NMD2;A6NC78	A0A1W2PRN1;A0A1W2PQV4;H3BPF8;H3BQL2;A0A1B0GVY7;H3BMC3;A0A0G2JPF6;H3BSY2-2;A6NN73;D6RF30;H3BSY2;A6NMD2;A6NC78	Golgin subfamily A member 8M;Golgin subfamily A member 8C;Golgin subfamily A member 8K;Golgin subfamily A member 8J;Putative golgin subfamily A member 8I	GOLGA8S;GOLGA8T;GOLGA8F;GOLGA8M;GOLGA8CP;GOLGA8K;GOLGA8J;GOLGA8IP	NaN	NaN	NaN	NaN	577680	NaN	NaN	NaN	NaN	13	1	1	1	2	2	2	68.54	1	-2	17330000	577680	30	1	0	1	0	0	17330000	0	0	2	0	0	1	0	0	1	0	0	1	0	DLAVRLQHSLQR	tr|A0A1W2PRN1|A0A1W2PRN1_HUMAN Isoform of A6NMD2, Golgin subfamily A member 8J OS=Homo sapiens OX=9606 GN=GOLGA8J PE=4 SV=1;tr|A0A1W2PQV4|A0A1W2PQV4_HUMAN Isoform of H3BQL2, Golgin subfamily A member 8T OS=Homo sapiens OX=9606 GN=GOLGA8T PE=4 SV=1;sp|H3BPF	2501	NaN
223	Q8MH48;Q5RJ85;A0A0G2JPQ3;P17693-4;P17693-5;P17693	Q8MH48;Q5RJ85;A0A0G2JPQ3;P17693-4;P17693-5;P17693	HLA class I histocompatibility antigen, alpha chain G	HLA-G	NaN	NaN	NaN	3565900	2097800	1620300	NaN	NaN	NaN	6	1	1	1	3	3	3	38.254	0.00046882	3.9173	145680000	7284000	20	3	1	1	1	71319000	41956000	32405000	3	3	3	1	1	1	1	1	1	1	1	1	DYLALNEDLR	tr|Q8MH48|Q8MH48_HUMAN Isoform of P17693, HLA class I histocompatibility antigen, alpha chain G OS=Homo sapiens OX=9606 GN=HLA-G PE=1 SV=1;tr|Q5RJ85|Q5RJ85_HUMAN Isoform of P17693, HLA class I histocompatibility antigen, alpha chain G OS=Homo sapiens OX=96	3069	NaN
224	Q8NF37;A0A0G2JQ62;A0A0G2JRI7	Q8NF37;A0A0G2JQ62;A0A0G2JRI7	Lysophosphatidylcholine acyltransferase 1	LPCAT1	67700000	33134000	19016000	1037100	2437000	1368000	NaN	NaN	NaN	3	4	4	4	11.2	11.2	11.2	59.151	0	35.44	140280000	4842100	21	12	4	4	4	51915000	57539000	30826000	7.1	11.2	11.2	2	4	4	2	4	4	2	4	4	LPADTCLLEFAR;TALGVAELTVTDLFR;TCLITFKPGAFIPGAPVQPVVLR;TLDTIQLAFK	sp|Q8NF37|PCAT1_HUMAN Lysophosphatidylcholine acyltransferase 1 OS=Homo sapiens OX=9606 GN=LPCAT1 PE=1 SV=2;tr|A0A0G2JQ62|A0A0G2JQ62_HUMAN Isoform of Q8NF37, Lysophosphatidylcholine acyltransferase 1 (Fragment) OS=Homo sapiens OX=9606 GN=LPCAT1 PE=1 SV=1;t	10478;15118;15181;15649	NaN;NaN;NaN;NaN
225	A0A0G2JRQ5;P30711-2;P30711	A0A0G2JRQ5;P30711-2;P30711	Glutathione S-transferase theta-1	GSTT1	NaN	NaN	NaN	1140500	679680	474590	NaN	NaN	NaN	3	1	1	1	8.4	8.4	8.4	24.739	0.003686	2.1012	22947000	2294700	10	3	1	1	1	11405000	6796800	4745900	8.4	8.4	8.4	1	1	1	1	1	1	1	1	1	VEAAVGEDLFQEAHEVILK	tr|A0A0G2JRQ5|A0A0G2JRQ5_HUMAN Isoform of P30711, Glutathione S-transferase theta-1 OS=Homo sapiens OX=9606 GN=GSTT1 PE=1 SV=1;sp|P30711-2|GSTT1_HUMAN Isoform of P30711, Isoform 2 of Glutathione S-transferase theta-1 OS=Homo sapiens OX=9606 GN=GSTT1;sp|P30	16554	NaN
226	A0A0G2JS82;O94973;O94973-2;A0A0G2JQM1;O94973-3;A0A0G2JRF9;A0A0G2JQA4;E9PR62	A0A0G2JS82;O94973;O94973-2;A0A0G2JQM1;O94973-3	AP-2 complex subunit alpha-2	AP2A2	20818000	11163000	10578000	408570	269200	109050	NaN	NaN	NaN	8	9	7	7	15.9	12.6	12.6	101.54	0	17.653	63427000	786830	48	11	7	2	2	45271000	12922000	5234600	14.7	7.7	6.5	8	5	4	6	3	2	6	3	2	ACNQLGQFLQHR;FVNLFPEVKPTIQDVLR;LTECLETILNK;NAVLFEAISLIIHHDSEPNLLVR;NNGVLFENQLLQIGLK;QLSNPQQEVQNIFK;TVFEALQAPACHENLVK;VGGYILGEFGNLIAGDPR;YGGTFQNVSVQLPITLNK	tr|A0A0G2JS82|A0A0G2JS82_HUMAN Isoform of O94973, AP-2 complex subunit alpha-2 (Fragment) OS=Homo sapiens OX=9606 GN=AP2A2 PE=1 SV=1;sp|O94973|AP2A2_HUMAN AP-2 complex subunit alpha-2 OS=Homo sapiens OX=9606 GN=AP2A2 PE=1 SV=2;sp|O94973-2|AP2A2_HUMAN Isofo	230;5230;10941;11902;12373;13166;16120;16800;18302	NaN;NaN;NaN;NaN;NaN;NaN;NaN;NaN;NaN
227	A0A0U1RQQ2;A0A0U1RRB8;A0A2R8YEE8;A0A0G2JSE9;C9JTA6;A0A2R8Y5N5;G5E975;Q12824-2;Q12824	A0A0U1RQQ2;A0A0U1RRB8;A0A2R8YEE8;A0A0G2JSE9;C9JTA6;A0A2R8Y5N5;G5E975;Q12824-2;Q12824	SWI/SNF-related matrix-associated actin-dependent regulator of chromatin subfamily B member 1	SMARCB1	NaN	NaN	NaN	2561200	1091600	NaN	NaN	NaN	NaN	9	1	1	1	16	16	16	9.094	0.0015438	2.4142	18264000	3652800	5	2	1	1	0	12806000	5458100	0	16	16	0	1	1	0	1	1	0	1	1	0	AVSISTEPPTYLR	tr|A0A0U1RQQ2|A0A0U1RQQ2_HUMAN Isoform of Q12824, SWI/SNF-related matrix-associated actin-dependent regulator of chromatin subfamily B member 1 (Fragment) OS=Homo sapiens OX=9606 GN=SMARCB1 PE=1 SV=1;tr|A0A0U1RRB8|A0A0U1RRB8_HUMAN Isoform of Q12824, SWI/SN	1661	NaN
228	Q9UHX1;Q9UHX1-2;Q9UHX1-5;Q9UHX1-3;Q9UHX1-6;Q9UHX1-4;A0A0J9YXX5;A0A0J9YVP6;A0A0J9YXJ8;A0A0J9YYL3;A0A0J9YWM1;A0A0J9YVR6;E9PQ56;H0YEM1;E9PN18;E9PMU7;E9PL19;H0YCP8	Q9UHX1;Q9UHX1-2;Q9UHX1-5;Q9UHX1-3;Q9UHX1-6;Q9UHX1-4;A0A0J9YXX5;A0A0J9YVP6;A0A0J9YXJ8;A0A0J9YYL3;A0A0J9YWM1;A0A0J9YVR6;E9PQ56;H0YEM1;E9PN18;E9PMU7	Poly(U)-binding-splicing factor PUF60	PUF60	60117000	55640000	66173000	6606700	3240200	2035300	NaN	NaN	NaN	18	13	13	13	33.5	33.5	33.5	59.875	0	69.382	447580000	11882000	25	32	12	11	9	246310000	116090000	85173000	28.6	29.9	19.1	10	11	6	10	11	6	10	11	6	AIQALNGR;ALAIMCR;AQSSQDAVSSMNLFDLGGQYLR;AVTPPMPLLTPATPGGLPPAAAVAAAAATAK;GYGFIEYEK;IYVASVHQDLSDDDIK;LGLPPLTPEQQEALQK;QAFAPFGPIK;SIDMSWDSVTMK;VGRPSNIGQAQPIIDQLAEEAR;VVAEVYDQER;VYVGSIYYELGEDTIR;YAMEQSIK	sp|Q9UHX1|PUF60_HUMAN Poly(U)-binding-splicing factor PUF60 OS=Homo sapiens OX=9606 GN=PUF60 PE=1 SV=1;sp|Q9UHX1-2|PUF60_HUMAN Isoform of Q9UHX1, Isoform 2 of Poly(U)-binding-splicing factor PUF60 OS=Homo sapiens OX=9606 GN=PUF60;sp|Q9UHX1-5|PUF60_HUMAN Is	776;832;1319;1676;6513;8475;9706;12827;14242;16842;17780;17971;18118	NaN;NaN;NaN;NaN;NaN;NaN;NaN;NaN;NaN;NaN;NaN;NaN;NaN
229	A0A0J9YW54;A2A2F0;Q86X10-2;Q86X10-3;Q86X10	A0A0J9YW54;A2A2F0;Q86X10-2;Q86X10-3;Q86X10	Ral GTPase-activating protein subunit beta	RALGAPB	NaN	NaN	NaN	124010	NaN	NaN	NaN	NaN	NaN	5	2	2	2	3.6	3.6	3.6	96.292	0.00046512	3.8494	4588400	124010	37	2	2	0	0	4588400	0	0	3.6	0	0	2	0	0	2	0	0	2	0	0	ADLSIPDLHEIVTEELEER;LAWAQQLCLLPR	tr|A0A0J9YW54|A0A0J9YW54_HUMAN Isoform of Q86X10, Ral GTPase-activating protein subunit beta (Fragment) OS=Homo sapiens OX=9606 GN=RALGAPB PE=1 SV=1;tr|A2A2F0|A2A2F0_HUMAN Isoform of Q86X10, Ral GTPase-activating protein subunit beta (Fragment) OS=Homo sap	311;9142	NaN;NaN
230	A0A0J9YW81;Q9H2S1-2;Q9H2S1	A0A0J9YW81;Q9H2S1-2;Q9H2S1	Small conductance calcium-activated potassium channel protein 2	KCNN2	NaN	NaN	NaN	2011900	1719600	1907700	NaN	NaN	NaN	3	1	1	1	2.2	2.2	2.2	64.114	0.005117	2.0184	146620000	5639100	26	3	1	1	1	52309000	44709000	49599000	2.2	2.2	2.2	1	1	1	1	1	1	1	1	1	LNDQANTLVDLAK	tr|A0A0J9YW81|A0A0J9YW81_HUMAN Isoform of Q9H2S1, Small conductance calcium-activated potassium channel protein 2 OS=Homo sapiens OX=9606 GN=KCNN2 PE=1 SV=1;sp|Q9H2S1-2|KCNN2_HUMAN Isoform of Q9H2S1, Isoform 2 of Small conductance calcium-activated potassi	10389	NaN
231	A0A0J9YWL0;Q9Y4K1;Q96QW7;Q9Y4K1-2	A0A0J9YWL0;Q9Y4K1	Absent in melanoma 1 protein	AIM1	NaN	NaN	NaN	84417	43470	71850	NaN	NaN	NaN	4	4	4	4	3	3	3	231.71	0	7.86	24410000	199740	95	6	1	2	3	8019600	9564700	6825800	0.7	1.7	2	1	2	3	1	2	3	1	2	3	GSSIDVLGIVANLK;SALFSSLLSSLPQDK;SLVLENVTDTAQDIPTTVDTK;VTVSEEEILPATR	tr|A0A0J9YWL0|A0A0J9YWL0_HUMAN Isoform of Q9Y4K1, Beta/gamma crystallin domain-containing protein 1 OS=Homo sapiens OX=9606 GN=CRYBG1 PE=1 SV=1;sp|Q9Y4K1|CRBG1_HUMAN Beta/gamma crystallin domain-containing protein 1 OS=Homo sapiens OX=9606 GN=CRYBG1 PE=1 S	6320;13836;14553;17767	NaN;NaN;NaN;NaN
232	V9GYD9;Q5VZZ6;A0A0J9YX66;A0A1B0GU44;E9PC62;A0A1B0GUN8;A0A0J9YXJ0;O95319-5;O95319-2;O95319;O95319-4;O95319-3;V9GY47;A0A0J9YXK1	V9GYD9;Q5VZZ6;A0A0J9YX66;A0A1B0GU44;E9PC62;A0A1B0GUN8;A0A0J9YXJ0;O95319-5;O95319-2;O95319;O95319-4;O95319-3;V9GY47;A0A0J9YXK1	CUGBP Elav-like family member 2	CELF2	NaN	NaN	NaN	NaN	433810	NaN	NaN	NaN	NaN	14	2	2	2	6.6	6.6	6.6	46.621	0	4.6576	6940900	433810	16	1	0	1	0	0	6940900	0	0	6.6	0	0	2	0	0	2	0	0	2	0	ELFEPYGAVYQINVLR;VMFSPFGQIEECR	tr|V9GYD9|V9GYD9_HUMAN Isoform of O95319, CUGBP Elav-like family member 2 OS=Homo sapiens OX=9606 GN=CELF2 PE=1 SV=1;tr|Q5VZZ6|Q5VZZ6_HUMAN Isoform of O95319, CUGBP Elav-like family member 2 OS=Homo sapiens OX=9606 GN=CELF2 PE=1 SV=2;tr|A0A0J9YX66|A0A0J9YX	3764;17304	NaN;NaN
233	C9JF46;P0CW19-2;A0A0J9YXC7;P48059;P48059-4;P48059-2;P48059-5;P48059-3	C9JF46;P0CW19-2;A0A0J9YXC7;P48059;P48059-4;P48059-2;P48059-5;P48059-3	LIM and senescent cell antigen-like-containing domain protein 1	LIMS1	NaN	NaN	NaN	455020	NaN	NaN	NaN	NaN	NaN	8	1	1	1	8.5	8.5	8.5	19.949	0.0015468	2.4201	3185200	455020	7	1	1	0	0	3185200	0	0	8.5	0	0	1	0	0	1	0	0	1	0	0	CDLCQEVLADIGFVK	tr|C9JF46|C9JF46_HUMAN Isoform of P48059, LIM and senescent cell antigen-like-containing domain protein 1 (Fragment) OS=Homo sapiens OX=9606 GN=LIMS1 PE=1 SV=8;sp|P0CW19-2|LIMS3_HUMAN Isoform of P0CW19, Isoform 2 of LIM and senescent cell antigen-like-cont	1772	NaN
234	J3QT77;A0A0J9YYG4;A0A0J9YXF2;Q15165-3;Q15165-1;Q15165;A0A0J9YYJ1;G3XAK4;A0A2Q2SAK4;A0A0J9YXM1;A0A0J9YXU7	J3QT77;A0A0J9YYG4;A0A0J9YXF2;Q15165-3;Q15165-1;Q15165;A0A0J9YYJ1;G3XAK4	Serum paraoxonase/arylesterase 2	PON2	35902000	22850000	19491000	1525200	753160	625550	NaN	NaN	NaN	11	4	4	4	23.1	23.1	23.1	37.98	0	11.64	96470000	2904000	17	10	5	2	3	68166000	14685000	13619000	23.1	9.6	9.6	4	2	2	4	2	2	4	2	2	EVESVDLPHCHLIK;HELLPSVNDITAVGPAHFYATNDHYFSDPFLK;LFVYDPNNPPSSEVLR;YIYVADILAHEIHVLEK	tr|J3QT77|J3QT77_HUMAN Isoform of Q15165, Serum paraoxonase/arylesterase 2 OS=Homo sapiens OX=9606 GN=PON2 PE=1 SV=1;tr|A0A0J9YYG4|A0A0J9YYG4_HUMAN Isoform of Q15165, Serum paraoxonase/arylesterase 2 OS=Homo sapiens OX=9606 GN=PON2 PE=1 SV=1;tr|A0A0J9YXF2|	4259;6619;9590;18385	NaN;NaN;NaN;NaN
235	A0A0R4J2E4;K7ENL6;Q8TES7-5;Q8TES7;Q8TES7-6	A0A0R4J2E4;K7ENL6;Q8TES7-5;Q8TES7;Q8TES7-6	Fas-binding factor 1	FBF1	NaN	NaN	NaN	NaN	95566	NaN	NaN	NaN	NaN	5	2	2	2	1.4	1.4	1.4	120.93	0.0037051	2.1521	5542800	95566	58	1	1	0	0	0	5542800	0	0.7	0.6	0	1	1	0	1	1	0	1	1	0	ALQVDTQR;INATALR	tr|A0A0R4J2E4|A0A0R4J2E4_HUMAN Isoform of Q8TES7, Fas-binding factor 1 (Fragment) OS=Homo sapiens OX=9606 GN=FBF1 PE=1 SV=2;tr|K7ENL6|K7ENL6_HUMAN Isoform of Q8TES7, Fas-binding factor 1 OS=Homo sapiens OX=9606 GN=FBF1 PE=1 SV=2;sp|Q8TES7-5|FBF1_HUMAN Isof	1028;7919	NaN;NaN
236	P43243;A8MXP9;A0A0R4J2E8;D6REM6;D6R991;H0Y8T4;P43243-2;B3KM87;D6RE02;D6RIA2;D6RBI2;D6RBK5;Q68E03;D6R8Z5;D6RAY2;D6RAM9;A0A1B0GX04;D6REK4;D6RCM3;D6RBS2;D6R9F3;D6RB45	P43243;A8MXP9;A0A0R4J2E8;D6REM6;D6R991;H0Y8T4	Matrin-3	MATR3	85636000	86064000	87756000	15242000	5550000	6016000	NaN	NaN	NaN	22	31	31	31	40.1	40.1	40.1	94.622	0	208.87	1702100000	26808000	37	92	36	26	30	928250000	368080000	405800000	33.9	30.5	32.7	26	22	24	26	22	24	26	22	24	ALWFQGR;CRDDSFFGETSHNYHK;DLDELSR;DLDELSRYPEDK;DLSAAGIGLLAAATQSLSMPASLGR;DSFDDRGPSLNPVLDYDHGSR;EDAMAMVDHCLK;EWSQHINGASHSR;FDSEYER;GAPPSSNIEDFHGLLPK;GDADQASNILASFGLSAR;GKNLRYQLLQLVEPFGVISNHLILNK;GNLGAGNGNLQGPR;GPGPLQER;GPLPLSSQHR;GPSLNPVLDYDHGSR;GYPHLCSICDLPVHSNK;IEELDQENEAALENGIK;ITPENLPQILLQLK;ITPENLPQILLQLKR;LCSLFYTNEEVAK;MDYEDDRLR;NLRYQLLQLVEPFGVISNHLILNK;NTHCSSLPHYQK;RGAPPSSNIEDFHGLLPK;RTEEGPT…	sp|P43243|MATR3_HUMAN Matrin-3 OS=Homo sapiens OX=9606 GN=MATR3 PE=1 SV=2;tr|A8MXP9|A8MXP9_HUMAN Isoform of P43243, Matrin-3 OS=Homo sapiens OX=9606 GN=MATR3 PE=1 SV=1;tr|A0A0R4J2E8|A0A0R4J2E8_HUMAN Isoform of P43243, Matrin-3 OS=Homo sapiens OX=9606 GN=MA	1092;1910;2505;2506;2628;2848;3270;4344;4523;5359;5399;5884;6109;6161;6176;6192;6535;7241;8287;8288;9174;11439;12311;12528;13510;13732;14699;15271;16946;17828;18555	NaN;NaN;NaN;NaN;NaN;NaN;NaN;NaN;NaN;NaN;NaN;NaN;NaN;NaN;NaN;NaN;NaN;NaN;NaN;NaN;NaN;NaN;NaN;NaN;NaN;NaN;NaN;NaN;NaN;NaN;NaN
237	H7C444;A0A0R4J2F6;Q12894;Q12894-2	H7C444;A0A0R4J2F6;Q12894;Q12894-2	Interferon-related developmental regulator 2	IFRD2	NaN	NaN	NaN	779700	NaN	670200	NaN	NaN	NaN	4	1	1	1	5.3	5.3	5.3	17.552	0.0037078	2.1581	5799600	1449900	4	2	1	0	1	3118800	0	2680800	5.3	0	5.3	1	0	1	1	0	1	1	0	1	LLPDFLLER	tr|H7C444|H7C444_HUMAN Isoform of Q12894, Interferon-related developmental regulator 2 (Fragment) OS=Homo sapiens OX=9606 GN=IFRD2 PE=1 SV=1;tr|A0A0R4J2F6|A0A0R4J2F6_HUMAN Isoform of Q12894, Interferon-related developmental regulator 2 OS=Homo sapiens OX=9	10228	NaN
238	C9JQP8;Q8N6B5;A0A0U1RQE0;A8MUV4;A0A0U1RQR8;A0A0U1RQY3;A0A0U1RQM2;O15409-8;O15409-5;O15409-7;O15409-6;O15409;O15409-9;O15409-4	C9JQP8;Q8N6B5;A0A0U1RQE0;A8MUV4;A0A0U1RQR8;A0A0U1RQY3;A0A0U1RQM2;O15409-8;O15409-5;O15409-7;O15409-6;O15409;O15409-9;O15409-4	Forkhead box protein P2	FOXP2	NaN	NaN	NaN	NaN	NaN	2133500	NaN	NaN	NaN	14	1	1	1	7.3	7.3	7.3	23.677	1	-2	6400400	2133500	3	1	0	0	1	0	0	6400400	0	0	7.3	0	0	1	0	0	1	0	0	1	QLLLQQQTSGLKSPK	tr|C9JQP8|C9JQP8_HUMAN Isoform of O15409, Forkhead box protein P2 (Fragment) OS=Homo sapiens OX=9606 GN=FOXP2 PE=1 SV=2;tr|Q8N6B5|Q8N6B5_HUMAN Isoform of O15409, Forkhead box P2, isoform CRA_d (Fragment) OS=Homo sapiens OX=9606 GN=FOXP2 PE=1 SV=1;tr|A0A0U1	13131	NaN
239	E3W994;H0Y5T1;J3KR49;A0A0U1RQI6;F8WA11;E7ERI8;E7EW49;O75122;Q7Z460-2;Q7Z460-4;Q7Z460-5;Q7Z460-3;O75122-3;Q7Z460	E3W994;H0Y5T1;J3KR49;A0A0U1RQI6;F8WA11;E7ERI8;E7EW49;O75122;Q7Z460-2;Q7Z460-4;Q7Z460-5;Q7Z460-3;O75122-3;Q7Z460	CLIP-associating protein 2;CLIP-associating protein 1	CLASP2;CLASP1	NaN	NaN	NaN	NaN	45714	50284	NaN	NaN	NaN	14	1	1	1	0.9	0.9	0.9	138.86	0.0015414	2.4033	7199800	95998	75	2	0	1	1	0	3428500	3771300	0	0.9	0.9	0	1	1	0	1	1	0	1	1	EGLLGLQNLLK	tr|E3W994|E3W994_HUMAN Isoform of O75122, CLIP-associating protein 2 OS=Homo sapiens OX=9606 GN=CLASP2 PE=1 SV=2;tr|H0Y5T1|H0Y5T1_HUMAN Isoform of Q7Z460, CLIP-associating protein 1 (Fragment) OS=Homo sapiens OX=9606 GN=CLASP1 PE=1 SV=2;tr|J3KR49|J3KR49_HU	3531	NaN
240	A0A0U1RQQ4;Q9UNN8	A0A0U1RQQ4;Q9UNN8	Endothelial protein C receptor	PROCR	41239000	46524000	43154000	3317300	2051200	1992900	NaN	NaN	NaN	2	2	2	2	12.2	12.2	12.2	24.284	0	7.5275	145550000	7361400	10	6	2	2	2	73588000	38286000	33678000	12.2	12.2	12.2	2	2	2	2	2	2	2	2	2	TLAFPLTIR;TQSGLQSYLLQFHGLVR	tr|A0A0U1RQQ4|A0A0U1RQQ4_HUMAN Isoform of Q9UNN8, Endothelial protein C receptor (Fragment) OS=Homo sapiens OX=9606 GN=PROCR PE=1 SV=1;sp|Q9UNN8|EPCR_HUMAN Endothelial protein C receptor OS=Homo sapiens OX=9606 GN=PROCR PE=1 SV=1	15629;15939	NaN;NaN
241	A0A0U1RQT9;C9JYN0;Q16563-2;Q16563	A0A0U1RQT9;C9JYN0;Q16563-2;Q16563	Synaptophysin-like protein 1	SYPL1	NaN	NaN	NaN	11882000	5523000	4953800	NaN	NaN	NaN	4	1	1	1	8.1	8.1	8.1	14.967	0.00048031	4.1692	111800000	22359000	5	3	1	1	1	59411000	27615000	24769000	8.1	8.1	8.1	1	1	1	1	1	1	1	1	1	TVTATFGYPFR	tr|A0A0U1RQT9|A0A0U1RQT9_HUMAN Isoform of Q16563, Synaptophysin-like protein 1 (Fragment) OS=Homo sapiens OX=9606 GN=SYPL1 PE=1 SV=1;tr|C9JYN0|C9JYN0_HUMAN Isoform of Q16563, Synaptophysin-like protein 1 OS=Homo sapiens OX=9606 GN=SYPL1 PE=1 SV=1;sp|Q16563	16202	NaN
242	A0A0U1RR22;Q9UNF0-2;Q9UNF0;B0QYG7;B0QYG8	A0A0U1RR22;Q9UNF0-2;Q9UNF0;B0QYG7;B0QYG8	Protein kinase C and casein kinase substrate in neurons protein 2	PACSIN2	NaN	NaN	NaN	1492700	290820	NaN	NaN	NaN	NaN	5	4	4	4	9.1	9.1	9.1	51.828	0	8.8886	39908000	1783600	20	5	2	2	1	29855000	10053000	0	4.4	6.7	2	2	3	1	2	3	1	2	3	1	AADAVEDLR;AIYHDLEQSIR;LCSDLMNCLHER;VSELHLEVK	tr|A0A0U1RR22|A0A0U1RR22_HUMAN Isoform of Q9UNF0, Protein kinase C and casein kinase substrate in neurons protein 2 (Fragment) OS=Homo sapiens OX=9606 GN=PACSIN2 PE=1 SV=1;sp|Q9UNF0-2|PACN2_HUMAN Isoform of Q9UNF0, Isoform 2 of Protein kinase C and casein	42;808;9173;17576	NaN;NaN;NaN;NaN
243	A0A0U1RR32;A0A0U1RRH7;Q99878;Q96KK5;Q9BTM1;P20671;P0C0S8;H0YFX9;Q93077;Q7L7L0;P04908;Q9BTM1-2	A0A0U1RR32;A0A0U1RRH7;Q99878;Q96KK5;Q9BTM1;P20671;P0C0S8;H0YFX9;Q93077;Q7L7L0;P04908;Q9BTM1-2	Histone H2A type 1-J;Histone H2A type 1-H;Histone H2A.J;Histone H2A type 1-D;Histone H2A type 1;Histone H2A;Histone H2A type 1-C;Histone H2A type 3;Histone H2A type 1-B/E	HIST1H2AJ;HIST1H2AH;H2AFJ;HIST1H2AD;HIST1H2AG;HIST1H2AC;HIST3H2A;HIST1H2AB	NaN	NaN	NaN	1263000	NaN	NaN	NaN	NaN	NaN	12	7	1	0	45	17.2	0	18.481	0	4.2456	23178000	1263000	8	5	5	0	0	23178000	0	0	45	27.8	27.8	7	6	6	1	0	0	0	0	0	AGLQFPVGR;HLQLAIR;HLQLAIRNDEELNK;NDEELNKLLGK;VGAGAPVYLAAVLEYLTAEILELAGNAAR;VTIAQGGVLPNIQAVLLPK;VTIAQGGVLPNIQAVLLPKK	tr|A0A0U1RR32|A0A0U1RR32_HUMAN Isoform of A0A0U1RRH7, Histone H2A OS=Homo sapiens OX=9606 GN=hCG_2039566 PE=3 SV=1;tr|A0A0U1RRH7|A0A0U1RRH7_HUMAN Histone H2A OS=Homo sapiens OX=9606 PE=3 SV=1;sp|Q99878|H2A1J_HUMAN Histone H2A type 1-J OS=Homo sapiens OX=96	591;6786;6787;11927;16763;17692;17693	NaN;NaN;NaN;NaN;NaN;NaN;NaN
244	A0A0U1RRM4;P26599;P26599-2;P26599-3;A6NLN1;A0A0D9SF20;K7EKJ7;K7EK45;K7ES59;K7ELW5;A0A087WU68;A0A087WUW5	A0A0U1RRM4;P26599;P26599-2;P26599-3;A6NLN1	Polypyrimidine tract-binding protein 1	PTBP1	269670000	272480000	240190000	44602000	18866000	20071000	NaN	NaN	NaN	12	18	18	16	49.5	49.5	46.9	62.463	0	142.29	2996400000	83540000	20	96	38	27	31	1690000000	665210000	641210000	45.2	29.4	39.8	17	12	15	17	12	15	15	10	13	AQAALQAVNSVQSGNLALAASAAAVDAGMAMAGQSPVLR;DYGNSPLHR;GQPIYIQFSNHK;HQNVQLPR;IAIPGLAGAGNSVLLVSNLNPER;KENALVQMADGNQAQLAMSHLNGHK;KLPIDVTEGEVISLGLPFGK;LHGKPIR;LPIDVTEGEVISLGLPFGK;LSLDGQNIYNACCTLR;LTSLNVK;MDGIVPDIAVGTK;NFQNIFPPSATLHLSNIPPSVSEEDLK;NNQFQALLQYADPVSAQHAK;NQAFIEMNTEEAANTMVNYYTSVTPVLR;VLFSSNGGVVK;VTNLLMLK;VTPQSLFILFGVYGDVQR	tr|A0A0U1RRM4|A0A0U1RRM4_HUMAN Isoform of P26599, Polypyrimidine tract-binding protein 1 OS=Homo sapiens OX=9606 GN=PTBP1 PE=1 SV=1;sp|P26599|PTBP1_HUMAN Polypyrimidine tract-binding protein 1 OS=Homo sapiens OX=9606 GN=PTBP1 PE=1 SV=1;sp|P26599-2|PTBP1_HU	1253;3063;6238;6870;7050;8600;8778;9792;10518;10845;11046;11411;12048;12385;12434;17110;17731;17737	NaN;NaN;NaN;NaN;NaN;NaN;NaN;NaN;NaN;NaN;NaN;NaN;NaN;NaN;NaN;NaN;NaN;NaN
245	A0A0U1RRM6;Q8N8S7-3;Q8N8S7-2;Q8N8S7	A0A0U1RRM6;Q8N8S7-3;Q8N8S7-2;Q8N8S7	Protein enabled homolog	ENAH	NaN	NaN	NaN	35007	322060	468250	NaN	NaN	NaN	4	3	3	3	4	4	4	87.399	0	6.394	19808000	790310	24	5	2	1	2	840170	7729400	11238000	4	1.2	1.2	2	1	2	2	1	2	2	1	2	EELIDAIR;GNGPLPLGGSGLMEEMSALLAR;LKEELIDAIR	tr|A0A0U1RRM6|A0A0U1RRM6_HUMAN Isoform of Q8N8S7, Protein enabled homolog OS=Homo sapiens OX=9606 GN=ENAH PE=1 SV=1;sp|Q8N8S7-3|ENAH_HUMAN Isoform of Q8N8S7, Isoform 3 of Protein enabled homolog OS=Homo sapiens OX=9606 GN=ENAH;sp|Q8N8S7-2|ENAH_HUMAN Isofor	3379;6102;9955	NaN;NaN;NaN
246	A0A0U1RRM8;H0YJ34;Q96AC1-2;Q96AC1;Q96AC1-3;H0YJB6;G3V1L6;Q9BQL6-4;Q9BQL6-2;Q9BQL6	A0A0U1RRM8;H0YJ34;Q96AC1-2;Q96AC1;Q96AC1-3	Fermitin family homolog 2	FERMT2	32186000	19323000	19784000	1232200	524440	499080	NaN	NaN	NaN	10	5	5	5	16.7	16.7	16.7	61.796	0	20.607	78215000	2255700	29	14	7	4	3	47748000	15993000	14473000	16.7	8.1	8.1	5	3	3	5	3	3	5	3	3	LLIPVAEGMNEIWLR;MQHLNPDPQLIPEQITTDITPECLVSPR;TMADSSYNLEVQNILSFLK;TSTILGDITSIPELADYIK;YYSFFDLNPK	tr|A0A0U1RRM8|A0A0U1RRM8_HUMAN Isoform of Q96AC1, Fermitin family homolog 2 (Fragment) OS=Homo sapiens OX=9606 GN=FERMT2 PE=1 SV=1;tr|H0YJ34|H0YJ34_HUMAN Isoform of Q96AC1, Fermitin family homolog 2 (Fragment) OS=Homo sapiens OX=9606 GN=FERMT2 PE=1 SV=1;sp	10160;11719;15791;16018;18696	NaN;NaN;NaN;NaN;NaN
247	A0A0X1KG71;Q8WX92	A0A0X1KG71;Q8WX92	Negative elongation factor B	NELFB	16591000	6245300	NaN	326440	178980	161120	NaN	NaN	NaN	2	5	5	5	16.2	16.2	16.2	70.038	0	11.196	30022000	666550	32	8	4	3	1	18208000	6658300	5155900	13.9	9.9	2.4	4	3	1	4	3	1	4	3	1	AIEQFQTENGVLLPSLQSALPFLDLHGTPR;APVSYPNTLPESFTK;DSPDLLLLLR;ESALFSTELSVLHNFFSPSPK;KPSPAQAAETPALELPLPSVPAPAPL	tr|A0A0X1KG71|A0A0X1KG71_HUMAN Isoform of Q8WX92, Negative elongation factor B OS=Homo sapiens OX=9606 GN=NELFB PE=1 SV=1;sp|Q8WX92|NELFB_HUMAN Negative elongation factor B OS=Homo sapiens OX=9606 GN=NELFB PE=1 SV=1	723;1246;2878;4103;8849	NaN;NaN;NaN;NaN;NaN
248	A0A140T9H5;A0A140T9U8;A0A140T921;O19617;P10321;A2AEA2;A0A140TA05;A0A140T9L3;A0A140T9E1;A0A1W2PRU9;A0A140T942;A0A140T9Q4;A0A140T9S7;A0A140TA19;A0A140TA12;A0A140T9Z7;F8W9Z8;Q6DU44;A0A0G2JKJ1;A0A140TA03;P13747	A0A140T9H5;A0A140T9U8;A0A140T921;O19617;P10321;A2AEA2;A0A140TA05;A0A140T9L3;A0A140T9E1;A0A1W2PRU9;A0A140T942	HLA class I histocompatibility antigen, Cw-7 alpha chain	HLA-C	39175000	44317000	38542000	4140600	1373400	1350100	NaN	NaN	NaN	21	7	7	1	27.4	27.4	4.3	41.363	0	66.496	231960000	6864100	18	14	7	4	3	133010000	54965000	43990000	24.2	17.7	19.4	6	4	5	6	4	5	1	1	0	APWVEQEGPEYWDR;AYLEGTCVEWLR;DGEDQTQDTELVETRPAGDGTFQK;FISVGYVDDTQFVR;MYGCDLGPDGR;THVTHHPLSDHEATLR;YLENGKETLQR	tr|A0A140T9H5|A0A140T9H5_HUMAN Isoform of Q95604, HLA class I histocompatibility antigen, Cw-6 alpha chain OS=Homo sapiens OX=9606 GN=HLA-C PE=1 SV=1;tr|A0A140T9U8|A0A140T9U8_HUMAN Isoform of Q95604, HLA class I histocompatibility antigen, Cw-6 alpha chain	1250;1727;2242;4785;11834;15506;18422	NaN;NaN;NaN;NaN;NaN;NaN;NaN
249	A0A140T947;O60231;A0A140T9T4;Q5SQH5;A0A140T8Y5	A0A140T947;O60231;A0A140T9T4;Q5SQH5;A0A140T8Y5	Putative pre-mRNA-splicing factor ATP-dependent RNA helicase DHX16	DHX16	NaN	NaN	NaN	311740	59591	54192	NaN	NaN	NaN	5	4	3	3	6.3	4.9	4.9	76.932	0	6.0496	16453000	371330	35	5	1	2	2	10911000	3645500	1896700	3.1	4.5	4.9	2	3	3	1	2	2	1	2	2	FPVDIFYTK;FSTFFDDAPVFR;TLHTDILFGLIK;YMTDGMLLR	tr|A0A140T947|A0A140T947_HUMAN Isoform of O60231, Pre-mRNA-splicing factor ATP-dependent RNA helicase DHX16 (Fragment) OS=Homo sapiens OX=9606 GN=DHX16 PE=1 SV=1;sp|O60231|DHX16_HUMAN Pre-mRNA-splicing factor ATP-dependent RNA helicase DHX16 OS=Homo sapien	4999;5134;15691;18493	NaN;NaN;NaN;NaN
250	Q5JNW7;A0A140T998;X5D2R7;P28062-2;P28062	Q5JNW7;A0A140T998;X5D2R7;P28062-2;P28062	Proteasome subunit beta type;Proteasome subunit beta type-8	PSMB8;PSM8	NaN	NaN	NaN	NaN	NaN	450800	NaN	NaN	NaN	5	1	1	1	5.6	5.6	5.6	27.85	0.00043975	3.3468	7663500	450800	17	1	0	0	1	0	0	7663500	0	0	5.6	0	0	1	0	0	1	0	0	1	VESTDVSDLLHQYR	tr|Q5JNW7|Q5JNW7_HUMAN Isoform of P28062, Proteasome subunit beta type-8 OS=Homo sapiens OX=9606 GN=PSMB8 PE=1 SV=1;tr|A0A140T998|A0A140T998_HUMAN Isoform of P28062, Proteasome subunit beta type-8 OS=Homo sapiens OX=9606 GN=PSMB8 PE=1 SV=1;tr|X5D2R7|X5D2R7	16655	NaN
251	A0A140T9T7;Q03518	A0A140T9T7;Q03518	Antigen peptide transporter 1	TAP1	NaN	NaN	NaN	124080	NaN	46342	NaN	NaN	NaN	2	1	1	1	2	2	2	87.175	0.0011867	2.5583	6305600	170420	37	0	0	0	0	4590900	0	1714600	2	0	2	1	0	1	1	0	1	1	0	1	LTDWILQDGSADTFTR	tr|A0A140T9T7|A0A140T9T7_HUMAN Isoform of Q03518, Antigen peptide transporter 1 OS=Homo sapiens OX=9606 GN=TAP1 PE=1 SV=1;sp|Q03518|TAP1_HUMAN Antigen peptide transporter 1 OS=Homo sapiens OX=9606 GN=TAP1 PE=1 SV=2	10939	NaN
252	A0A1B0GUC3;A0A1B0GV98;A0A1B0GTC5;A0A1B0GU26;A0A1B0GTC3;A0A1B0GVH5;Q9C0B1;A0A1B0GTY1;A0A1B0GTZ8;F8WCB8;X6R3I0;A0A1B0GUY7;A0A1B0GTI3;Q9C0B1-4;Q9C0B1-2	A0A1B0GUC3;A0A1B0GV98;A0A1B0GTC5;A0A1B0GU26;A0A1B0GTC3;A0A1B0GVH5;Q9C0B1;A0A1B0GTY1	Alpha-ketoglutarate-dependent dioxygenase FTO	FTO	NaN	NaN	NaN	692630	32313	29715	NaN	NaN	NaN	15	4	4	4	12.9	12.9	12.9	51.802	0	6.8374	20440000	754660	26	6	3	2	1	18008000	1659400	772590	12.9	3.1	3.1	4	1	1	4	1	1	4	1	1	LFTVPWPVK;LLEELEDTWLPYLTPK;LNDYLQIETIQALEELAAK;NEILTAILASLTAR	tr|A0A1B0GUC3|A0A1B0GUC3_HUMAN Isoform of Q9C0B1, Alpha-ketoglutarate-dependent dioxygenase FTO OS=Homo sapiens OX=9606 GN=FTO PE=1 SV=1;tr|A0A1B0GV98|A0A1B0GV98_HUMAN Isoform of Q9C0B1, Alpha-ketoglutarate-dependent dioxygenase FTO OS=Homo sapiens OX=9606	9570;10058;10391;11986	NaN;NaN;NaN;NaN
253	Q13510-2;A0A1B0GUE3;A0A1B0GUH5;A0A1B0GTZ5;A0A1B0GTM3;A0A1B0GUA4;A0A1B0GW68;E7EMM4;A0A1B0GUW4;A0A1B0GTP7;Q13510;A0A1B0GU06;A0A1B0GV06;A0A1B0GUB3;A0A1B0GW66;A0A1B0GU62;A0A1B0GVG2;A0A1B0GUG1;A0A1B0GVE7;A0A1B0GVJ1;A0A1B0GW48;A0A1B0GUJ3;A0A1B0GV95;Q13510-3;A0A1B0GVA3	Q13510-2;A0A1B0GUE3;A0A1B0GUH5;A0A1B0GTZ5;A0A1B0GTM3;A0A1B0GUA4;A0A1B0GW68;E7EMM4;A0A1B0GUW4;A0A1B0GTP7;Q13510;A0A1B0GU06;A0A1B0GV06;A0A1B0GUB3;A0A1B0GW66;A0A1B0GU62;A0A1B0GVG2;A0A1B0GUG1;A0A1B0GVE7;A0A1B0GVJ1;A0A1B0GW48;A0A1B0GUJ3;A0A1B0GV95;Q13510-3;A0A1B0GVA3	Acid ceramidase;Acid ceramidase subunit alpha;Acid ceramidase subunit beta	ASAH1	NaN	NaN	NaN	121780	34864	121090	NaN	NaN	NaN	25	2	2	2	9.7	9.7	9.7	46.503	0	5.4335	11157000	156640	26	3	1	1	1	3166300	4841900	3148400	4.1	9.7	5.6	1	2	1	1	2	1	1	2	1	LPGLLGNFPGPFEEEMK;TSQENISFETMYDVLSTKPVLNK	sp|Q13510-2|ASAH1_HUMAN Isoform of Q13510, Isoform 2 of Acid ceramidase OS=Homo sapiens OX=9606 GN=ASAH1;tr|A0A1B0GUE3|A0A1B0GUE3_HUMAN Isoform of Q13510, Acid ceramidase OS=Homo sapiens OX=9606 GN=ASAH1 PE=1 SV=1;tr|A0A1B0GUH5|A0A1B0GUH5_HUMAN Isoform of	10512;16007	NaN;NaN
254	A0A1B0GTW1;A0A2R8YDH4;Q9UDY2-3;Q9UDY2;Q9UDY2-7;Q9UDY2-6;Q9UDY2-4;Q9UDY2-2;Q9UDY2-5;U3KQJ2;B1AN86	A0A1B0GTW1;A0A2R8YDH4;Q9UDY2-3;Q9UDY2;Q9UDY2-7;Q9UDY2-6;Q9UDY2-4;Q9UDY2-2;Q9UDY2-5	Tight junction protein ZO-2	TJP2	27870000	27991000	41270000	1820200	754670	1861800	NaN	NaN	NaN	11	21	21	21	18.9	18.9	18.9	140.73	0	50.956	406040000	4436700	69	40	11	8	21	168070000	72537000	165430000	8.2	7.2	17	10	8	18	10	8	18	10	8	18	APSRPYQDTR;AYDPDYER;DGNLHEGDIILK;EDAVLYLLEIPK;GDSFFIR;GFGIAVSGGR;GLDHDFGPSR;GRPGPIGVLLMK;HALLDVTPK;LANELPDWFQTAK;LGNWLAVR;LGSQIFVK;LQLVVLR;MGATPTPFK;RPVVLFGPIADIAMEK;SNPSAVAGNETPGASTK;SSEPVQHEESIR;TFLRPSPEDEAIYGPNTK;VAAIVVK;VVDTLYDGK;VVMVNGTPMEDVLHSFAVQQLR	tr|A0A1B0GTW1|A0A1B0GTW1_HUMAN Isoform of Q9UDY2, Tight junction protein ZO-2 OS=Homo sapiens OX=9606 GN=TJP2 PE=1 SV=1;tr|A0A2R8YDH4|A0A2R8YDH4_HUMAN Tight junction protein ZO-2 OS=Homo sapiens OX=9606 GN=TJP2 PE=3 SV=1;sp|Q9UDY2-3|ZO2_HUMAN Isoform of Q9	1234;1709;2280;3275;5459;5614;5911;6260;6566;9068;9721;9749;10680;11522;13698;14621;14782;15356;16273;17800;17858	NaN;NaN;NaN;NaN;NaN;NaN;NaN;NaN;NaN;NaN;NaN;NaN;NaN;NaN;NaN;NaN;NaN;NaN;NaN;NaN;NaN
255	A0A1B0GUA3;Q96EK5	A0A1B0GUA3;Q96EK5	KIF1-binding protein	KIAA1279	NaN	NaN	NaN	150100	144940	NaN	NaN	NaN	NaN	2	2	2	2	4.6	4.6	4.6	74.783	0	5.0984	15676000	295030	35	3	2	1	0	10603000	5072800	0	2.9	4.6	0	1	2	0	1	2	0	1	2	0	AVQFGTGELCDAISAVEEK;VLAFFETDMER	tr|A0A1B0GUA3|A0A1B0GUA3_HUMAN Isoform of Q96EK5, KIF1-binding protein OS=Homo sapiens OX=9606 GN=KIF1BP PE=1 SV=1;sp|Q96EK5|KBP_HUMAN KIF1-binding protein OS=Homo sapiens OX=9606 GN=KIF1BP PE=1 SV=1	1654;17029	NaN;NaN
256	A0A1B0GUB2;Q6P1J9;A0A2R8Y640;A0A2R8YHB3	A0A1B0GUB2;Q6P1J9;A0A2R8Y640;A0A2R8YHB3	Parafibromin	CDC73	NaN	NaN	NaN	NaN	159840	153930	NaN	NaN	NaN	4	2	2	2	6.2	6.2	6.2	51.454	0	4.8501	9742500	313770	27	3	0	1	2	0	4315700	5426800	0	1.8	6.2	0	1	2	0	1	2	0	1	2	ADVLSVLR;TPIIIIPAATTSLITMLNAK	tr|A0A1B0GUB2|A0A1B0GUB2_HUMAN Isoform of Q6P1J9, Parafibromin OS=Homo sapiens OX=9606 GN=CDC73 PE=1 SV=1;sp|Q6P1J9|CDC73_HUMAN Parafibromin OS=Homo sapiens OX=9606 GN=CDC73 PE=1 SV=1;tr|A0A2R8Y640|A0A2R8Y640_HUMAN Isoform of Q6P1J9, Parafibromin OS=Homo s	336;15871	NaN;NaN
257	A0A1B0GV93;Q53GQ0	A0A1B0GV93;Q53GQ0	Very-long-chain 3-oxoacyl-CoA reductase	HSD17B12	NaN	NaN	NaN	243170	632170	NaN	NaN	NaN	NaN	2	1	1	1	5.4	5.4	5.4	30.361	0.0058224	1.9774	11380000	632170	13	2	1	1	0	3161300	8218300	0	5.4	5.4	0	1	1	0	1	1	0	1	1	0	GVFVQSVLPYFVATK	tr|A0A1B0GV93|A0A1B0GV93_HUMAN Isoform of Q53GQ0, Very-long-chain 3-oxoacyl-CoA reductase OS=Homo sapiens OX=9606 GN=HSD17B12 PE=1 SV=1;sp|Q53GQ0|DHB12_HUMAN Very-long-chain 3-oxoacyl-CoA reductase OS=Homo sapiens OX=9606 GN=HSD17B12 PE=1 SV=2	6414	NaN
258	A0A1B0GW44;A0A1B0GVD5;A0A1B0GWE8;P07339;A0A1B0GV23;H7C469;A0A1B0GVP3;A0A1B0GU92;A0A1B0GU03;C9JH19;H7C1V0;F8WD96;F8W787;A0A1B0GVF1	A0A1B0GW44;A0A1B0GVD5;A0A1B0GWE8;P07339;A0A1B0GV23;H7C469;A0A1B0GVP3;A0A1B0GU92;A0A1B0GU03;C9JH19;H7C1V0	Cathepsin D;Cathepsin D light chain;Cathepsin D heavy chain	CTSD	84642000	79524000	71816000	16579000	6798600	6265000	NaN	NaN	NaN	14	12	12	12	40.2	40.2	40.2	43.688	0	45.6	647730000	29642000	18	33	14	9	10	364040000	150590000	133100000	37.5	26.7	25.7	11	8	8	11	8	8	11	8	8	AIGAVPLIQGEYMIPCEK;AYWQVHLDQVEVASGLTLCK;DPDAQPGGELMLGGTDSK;EGCEAIVDTGTSLMVGPVDEVR;FDGILGMAYPR;ISVNNVLPVFDNLMQQK;LSPEDYTLK;LVDQNIFSFYLSR;QPGITFIAAK;VGFAEAAR;VSTLPAITLK;YYTVFDR	tr|A0A1B0GW44|A0A1B0GW44_HUMAN Isoform of P07339, Cathepsin D OS=Homo sapiens OX=9606 GN=CTSD PE=1 SV=1;tr|A0A1B0GVD5|A0A1B0GVD5_HUMAN Isoform of P07339, Cathepsin D OS=Homo sapiens OX=9606 GN=CTSD PE=1 SV=1;tr|A0A1B0GWE8|A0A1B0GWE8_HUMAN Isoform of P07339	731;1744;2750;3479;4499;8222;10869;11099;13221;16791;17639;18699	NaN;NaN;NaN;NaN;NaN;NaN;NaN;NaN;NaN;NaN;NaN;NaN
259	Q5T446;H0Y5R6;A0A1B0GVN9;A0A1B0GVZ4;P06132	Q5T446;H0Y5R6;A0A1B0GVN9;A0A1B0GVZ4;P06132	Uroporphyrinogen decarboxylase	UROD	NaN	NaN	NaN	2003300	445640	798970	NaN	NaN	NaN	5	3	3	3	24.9	24.9	24.9	21.458	0	8.6577	45143000	445640	10	4	2	1	1	20033000	17120000	7989700	19.7	13.5	8.3	2	2	1	2	2	1	2	2	1	AAQDFFSTCR;GPSFPEPLREEQDLER;LRDPEVVASELGYVFQAITLTR	tr|Q5T446|Q5T446_HUMAN Isoform of P06132, Uroporphyrinogen decarboxylase (Fragment) OS=Homo sapiens OX=9606 GN=UROD PE=1 SV=1;tr|H0Y5R6|H0Y5R6_HUMAN Isoform of P06132, Uroporphyrinogen decarboxylase (Fragment) OS=Homo sapiens OX=9606 GN=UROD PE=1 SV=1;tr|A	151;6188;10750	NaN;NaN;NaN
260	A0A1B0GWA2;A0A2R8YEL0;O00116;B8ZZ81	A0A1B0GWA2;A0A2R8YEL0;O00116	Alkyldihydroxyacetonephosphate synthase, peroxisomal	AGPS	24667000	20285000	16005000	718300	400260	329560	NaN	NaN	NaN	4	6	6	6	19.7	19.7	19.7	60.807	0	17.235	94661000	1448100	29	13	5	4	4	46685000	21470000	26506000	12.5	12.7	14	4	4	4	4	4	4	4	4	4	ASLNPSDTPPSVVNEDFLHDLK;GFDPNQLSVATLLFEGDREK;GISDPLTVFEQTEAAAR;IPDIVLWPTCHDDVVK;KNIYGNIEDLVVHIK;YGSVAFPNFEQGVACLR	tr|A0A1B0GWA2|A0A1B0GWA2_HUMAN Isoform of O00116, Alkylglycerone-phosphate synthase (Fragment) OS=Homo sapiens OX=9606 GN=AGPS PE=1 SV=1;tr|A0A2R8YEL0|A0A2R8YEL0_HUMAN Isoform of O00116, Alkylglycerone-phosphate synthase (Fragment) OS=Homo sapiens OX=9606	1407;5579;5855;7966;8805;18325	NaN;NaN;NaN;NaN;NaN;NaN
261	A0A1C7CYX9;Q16555-2;Q16555;E5RFU4	A0A1C7CYX9;Q16555-2;Q16555	Dihydropyrimidinase-related protein 2	DPYSL2	81832000	109980000	98389000	10766000	8493900	5900500	NaN	NaN	NaN	4	22	22	18	47.1	47.1	40.6	73.502	0	124.94	1663200000	25161000	39	62	18	24	20	731600000	537780000	393790000	44.5	36.3	34.7	19	18	16	19	18	16	16	14	12	AALAGGTTMIIDHVVPEPGTSLLAAFDQWR;AITIANQTNCPLYITK;DNFTLIPEGTNGTEER;FQLTDCQIYEVLSVIR;GIQEEMEALVK;GLYDGPVCEVSVTPK;GSPLVVISQGK;GTVVYGEPITASLGTDGSHYWSK;IAVGSDADLVIWDPDSVK;ILDLGITGPEGHVLSRPEEVEAEAVNR;IVAPPGGR;IVLEDGTLHVTEGSGR;KGTVVYGEPITASLGTDGSHYWSK;KPFPDFVYK;MDENQFVAVTSTNAAK;MSVIWDK;MVIPGGIDVHTR;NLHQSGFSLSGAQIDDNIPR;QIGENLIVPGGVK;SSAEVIAQAR;THNSSLEYNIFEGMECR;VFNLYPR	tr|A0A1C7CYX9|A0A1C7CYX9_HUMAN Isoform of Q16555, Dihydropyrimidinase-related protein 2 OS=Homo sapiens OX=9606 GN=DPYSL2 PE=1 SV=1;sp|Q16555-2|DPYL2_HUMAN Isoform of Q16555, Isoform 2 of Dihydropyrimidinase-related protein 2 OS=Homo sapiens OX=9606 GN=DPY	99;790;2708;5023;5850;6059;6311;6384;7092;7709;8325;8376;8700;8825;11409;11757;11797;12254;13034;14771;15498;16735	NaN;NaN;NaN;NaN;NaN;NaN;NaN;NaN;NaN;NaN;NaN;NaN;NaN;NaN;NaN;NaN;NaN;NaN;NaN;NaN;NaN;NaN
262	E5RJ57;D6RJF9;A0A286YFD7;A0A286YEQ0;A0A286YEQ7;A0A286YEX7;A0A286YFC0;A0A286YFJ6;A8MWW6;A0A1P0B7D2;A0A286YFJ4;A0A286YES9;D7R525;A0A286YEN5;A0A286YF85;A0A286YF97;A0A286YFA6;A0A286YF62;A0A286YFK3;A0A286YFI3;A0A286YEW9;A0A286YF83;A0A286YFE2;A0A286YF02;A0A286YFM6;A0A1W2PRF2;A0A286YEY0;J3KNK1;A0A286YEV3;D6R9C1;A0A286YES0;A0A286YFN2;A0A286YFB6;A0A286YF35;P53779-2;A0A286YF19;D6RCB1;P53779;P45984-3;P45984…	E5RJ57;D6RJF9;A0A286YFD7;A0A286YEQ0;A0A286YEQ7;A0A286YEX7;A0A286YFC0;A0A286YFJ6;A8MWW6;A0A1P0B7D2;A0A286YFJ4;A0A286YES9;D7R525;A0A286YEN5;A0A286YF85;A0A286YF97;A0A286YFA6;A0A286YF62;A0A286YFK3;A0A286YFI3;A0A286YEW9;A0A286YF83;A0A286YFE2;A0A286YF02;A0A286YFM6;A0A1W2PRF2;A0A286YEY0;J3KNK1;A0A286YEV3;D6R9C1;A0A286YES0;A0A286YFN2;A0A286YFB6;A0A286YF35;P53779-2;A0A286YF19;D6RCB1;P53779;P45984-3;P45984…	Mitogen-activated protein kinase 10;Mitogen-activated protein kinase 9	MAPK9;MAPK10	NaN	NaN	NaN	867480	292810	200520	NaN	NaN	NaN	44	1	1	1	12.6	12.6	12.6	11.579	0.00047506	4.0381	6804000	1360800	5	3	1	1	1	4337400	1464000	1002600	12.6	12.6	12.6	1	1	1	1	1	1	1	1	1	NIISLLNVFTPQK	tr|E5RJ57|E5RJ57_HUMAN Isoform of P45984, Mitogen-activated protein kinase 9 (Fragment) OS=Homo sapiens OX=9606 GN=MAPK9 PE=1 SV=8;tr|D6RJF9|D6RJF9_HUMAN Isoform of P53779, Mitogen-activated protein kinase OS=Homo sapiens OX=9606 GN=MAPK10 PE=1 SV=9;tr|A0A	12152	NaN
263	A0A1W2PNP0;A0A1W2PPR6;A0A1W2PQN1;A0A1W2PR92;A0A1W2PP57;H7C2Y2;A0A1W2PPC3;A0A1W2PPS0;Q969N2-3;Q969N2-4;Q969N2-6;Q969N2-5;Q969N2;A0A1W2PPK4;A0A1W2PP53;A0A1W2PRZ8;A0A1W2PR73;A0A1W2PRH2;A0A1W2PRV7;F6W983;A0A1W2PPI8;A0A1W2PQ29;A0A1W2PNW9;A0A1W2PRG1;A0A1W2PQY1;Q969N2-2	A0A1W2PNP0;A0A1W2PPR6;A0A1W2PQN1;A0A1W2PR92;A0A1W2PP57;H7C2Y2;A0A1W2PPC3;A0A1W2PPS0;Q969N2-3;Q969N2-4;Q969N2-6;Q969N2-5;Q969N2;A0A1W2PPK4;A0A1W2PP53;A0A1W2PRZ8;A0A1W2PR73;A0A1W2PRH2;A0A1W2PRV7;F6W983;A0A1W2PPI8;A0A1W2PQ29;A0A1W2PNW9;A0A1W2PRG1;A0A1W2PQY1;Q969N2-2	GPI transamidase component PIG-T	PIGT	NaN	NaN	NaN	174490	61150	139430	NaN	NaN	NaN	26	2	2	2	4.7	4.7	4.7	65.981	0.0012068	2.6578	12741000	139430	30	4	1	1	2	5234600	1834500	5672000	3.3	3.3	4.7	1	1	2	1	1	2	1	1	2	AGLSVLLK;LQPHLLEMLIQLPANSVTK	tr|A0A1W2PNP0|A0A1W2PNP0_HUMAN Isoform of Q969N2, GPI transamidase component PIG-T (Fragment) OS=Homo sapiens OX=9606 GN=PIGT PE=1 SV=1;tr|A0A1W2PPR6|A0A1W2PPR6_HUMAN Isoform of Q969N2, GPI transamidase component PIG-T (Fragment) OS=Homo sapiens OX=9606 GN	593;10694	NaN;NaN
264	F8VYC4;A0A286YES2;A0A1W2PNU4;P0DJD0;P0DJD1	F8VYC4;A0A286YES2;A0A1W2PNU4;P0DJD0;P0DJD1	RANBP2-like and GRIP domain-containing protein 1;RANBP2-like and GRIP domain-containing protein 2	RGPD1;RGPD2	NaN	NaN	NaN	NaN	NaN	41272	NaN	NaN	NaN	5	4	1	1	3.1	1	1	197.33	1	-2	3673200	41272	89	1	0	0	1	0	0	3673200	1.3	1.4	2.4	2	2	3	0	0	1	0	0	1	ESLLPVINTMLQLSPEEK;IAVAVLEETTR;LLLDIPLQTPHK;LSQSGHMLLNLSR	tr|F8VYC4|F8VYC4_HUMAN Isoform of P0DJD0, RANBP2-like and GRIP domain-containing protein 1 OS=Homo sapiens OX=9606 GN=RGPD1 PE=4 SV=1;tr|A0A286YES2|A0A286YES2_HUMAN Isoform of P0DJD0, RANBP2-like and GRIP domain-containing protein 1 OS=Homo sapiens OX=9606	4128;7091;10172;10884	NaN;NaN;NaN;NaN
265	A0A1W2PNX8;Q9H3U1-2;Q9H3U1	A0A1W2PNX8;Q9H3U1-2;Q9H3U1	Protein unc-45 homolog A	UNC45A	NaN	14271000	17090000	411190	234750	280290	NaN	NaN	NaN	3	6	6	6	6.9	6.9	6.9	118.39	0	12.854	58177000	926240	59	9	1	4	4	24260000	16385000	17532000	1.8	5.1	3.3	2	4	3	2	4	3	2	4	3	DNALTLLIK;SLKDPNNSLTLWVIDQGLK;SWFEGQGLAGK;TESPVLTSSCR;TVATLSILGTR;VEQMFQILLDPEEK	tr|A0A1W2PNX8|A0A1W2PNX8_HUMAN Isoform of Q9H3U1, Protein unc-45 homolog A OS=Homo sapiens OX=9606 GN=UNC45A PE=1 SV=1;sp|Q9H3U1-2|UN45A_HUMAN Isoform of Q9H3U1, Isoform 2 of Protein unc-45 homolog A OS=Homo sapiens OX=9606 GN=UNC45A;sp|Q9H3U1|UN45A_HUMAN	2703;14464;15022;15310;16093;16646	NaN;NaN;NaN;NaN;NaN;NaN
266	E9PPJ9;A0A1W2PQA7;A0A1W2PNY5;A0A1W2PQZ6;A0A1W2PRF0;A0A1W2PRJ0;A0A1W2PPP6;A0A1X7SBS0;A0A1W2PS93;A0A1W2PR08;A0A1W2PRF5;G5E9D4;Q96EB1;Q96EB1-3;Q96EB1-2	E9PPJ9;A0A1W2PQA7;A0A1W2PNY5;A0A1W2PQZ6;A0A1W2PRF0;A0A1W2PRJ0;A0A1W2PPP6;A0A1X7SBS0;A0A1W2PS93;A0A1W2PR08;A0A1W2PRF5;G5E9D4;Q96EB1;Q96EB1-3;Q96EB1-2	Elongator complex protein 4	ELP4	NaN	NaN	NaN	224610	79558	NaN	NaN	NaN	NaN	15	1	1	1	9.7	9.7	9.7	19.976	0.00045475	3.6484	3762500	304170	10	3	1	2	0	2246100	1516300	0	9.7	9.7	0	1	1	0	1	1	0	1	1	0	EDPANILQELPAPLLDDK	tr|E9PPJ9|E9PPJ9_HUMAN Isoform of Q96EB1, Elongator complex protein 4 OS=Homo sapiens OX=9606 GN=ELP4 PE=1 SV=1;tr|A0A1W2PQA7|A0A1W2PQA7_HUMAN Isoform of Q96EB1, Elongator complex protein 4 OS=Homo sapiens OX=9606 GN=ELP4 PE=1 SV=1;tr|A0A1W2PNY5|A0A1W2PNY5	3309	NaN
267	A0A1W2PQ37;A0A1W2PQF8;A0A1W2PQT3;A0A1W2PPH1;A0A1W2PQH3;A0A1W2PQY8;P23368-2;P23368;A0A1W2PR68;A0A1W2PPY2;A0A1W2PRS2;A0A1W2PRY9;A0A1W2PQH4	A0A1W2PQ37;A0A1W2PQF8;A0A1W2PQT3;A0A1W2PPH1;A0A1W2PQH3;A0A1W2PQY8;P23368-2;P23368;A0A1W2PR68	NAD-dependent malic enzyme, mitochondrial	ME2	NaN	NaN	NaN	81923	377010	390380	NaN	NaN	NaN	13	5	5	5	22.6	22.6	22.6	49.476	0	7.0208	22093000	767390	23	5	2	1	2	4442700	8671300	8978800	14.4	4.1	5.9	2	2	2	2	2	2	2	2	2	IDSYQEPFTHSAPESIPDTFEDAVNILKPSTIIGVAGAGR;ILGLGDLGVYGMGIPVGK;LFTPDVIR;YCTFNDDIQGTAAVALAGLLAAQK;YIYIMGIQER	tr|A0A1W2PQ37|A0A1W2PQ37_HUMAN Isoform of P23368, Malic enzyme OS=Homo sapiens OX=9606 GN=ME2 PE=1 SV=1;tr|A0A1W2PQF8|A0A1W2PQF8_HUMAN Isoform of P23368, Malic enzyme OS=Homo sapiens OX=9606 GN=ME2 PE=1 SV=1;tr|A0A1W2PQT3|A0A1W2PQT3_HUMAN Isoform of P23368	7202;7749;9566;18150;18384	NaN;NaN;NaN;NaN;NaN
268	C9J4M6;A0A1W2PPT5;C9J2Y9;P30876	C9J4M6;A0A1W2PPT5;C9J2Y9;P30876	DNA-directed RNA polymerase;DNA-directed RNA polymerase II subunit RPB2	POLR2B	NaN	NaN	NaN	124340	111850	45718	NaN	NaN	NaN	4	5	5	5	5.2	5.2	5.2	121.37	0	5.8019	26812000	281900	56	2	0	1	1	6962800	11369000	8480800	0.8	3.4	3.2	1	3	3	1	3	3	1	3	3	DCQIAHGAAQFLR;ISNLLSDYGYHLR;IVATLPYIK;QEVPIIIVFR;YTKRDCSTFLR	tr|C9J4M6|C9J4M6_HUMAN Isoform of P30876, DNA-directed RNA polymerase subunit beta OS=Homo sapiens OX=9606 GN=POLR2B PE=1 SV=3;tr|A0A1W2PPT5|A0A1W2PPT5_HUMAN Isoform of P30876, DNA-directed RNA polymerase subunit beta OS=Homo sapiens OX=9606 GN=POLR2B PE=1	2063;8187;8328;12942;18619	NaN;NaN;NaN;NaN;NaN
269	A0A1W2PPZ5;P23193;A0A1W2PRL9;P23193-2;B7Z4S1;E5RJ93;E5RIS7;E5RK46;A0A1W2PS15;E5RFI1;A0A1W2PPV7;Q5JRI7;A0A0A0MT58;Q15560-2;Q15560	A0A1W2PPZ5;P23193;A0A1W2PRL9;P23193-2	Transcription elongation factor A protein 1	TCEA1	38688000	53756000	55466000	7905500	4250800	4806300	NaN	NaN	NaN	15	7	7	7	29.6	29.6	29.6	33.935	0	20.963	306060000	16963000	17	17	4	5	8	142160000	77298000	86606000	19.6	15	24.9	5	4	6	5	4	6	5	4	6	DTYVSSFPR;MTAEEMASDELK;NAAGALDLLK;NIPMTLELLQSTR;NVLCGNIPPDLFAR;SADEPMTTFVVCNECGNR;TGGTQTDLFTCGK	tr|A0A1W2PPZ5|A0A1W2PPZ5_HUMAN Isoform of P23193, Transcription elongation factor A protein 1 OS=Homo sapiens OX=9606 GN=TCEA1 PE=1 SV=1;sp|P23193|TCEA1_HUMAN Transcription elongation factor A protein 1 OS=Homo sapiens OX=9606 GN=TCEA1 PE=1 SV=2;tr|A0A1W2P	2941;11760;11844;12176;12597;13800;15425	NaN;NaN;NaN;NaN;NaN;NaN;NaN
270	A0A1X7SBZ2;A0A1W2PQ51;Q92841;Q92841-1;Q92841-3;Q92841-2;A0A0U1RQJ0	A0A1X7SBZ2;A0A1W2PQ51;Q92841;Q92841-1;Q92841-3;Q92841-2	Probable ATP-dependent RNA helicase DDX17	DDX17	72998000	76823000	80840000	15183000	5445400	4386200	NaN	NaN	NaN	7	25	18	18	35.3	26.5	26.5	80.253	0	99.215	1107600000	25015000	37	44	16	15	13	660560000	237570000	209440000	33.6	27.2	28.3	23	18	19	17	13	13	17	13	13	APILIATDVASR;APLPDLYPFGTMR;CTYLVLDEADR;DWVLNEFR;ELAQQVQQVADDYGK;FVINYDYPNSSEDYVHR;GDGPICLVLAPTR;GLDVEDVK;GTAYTFFTPGNLK;IVDQIRPDR;KIVDQIRPDR;LIDFLESGK;LIQLMEEIMAEK;LIQLMEEIMAEKENK;LMQLVDHR;LTPYEVDELR;LTPYEVDELRR;MLDMGFEPQIR;NFYVEHPEVAR;QLAEDFLR;SSQSSSQQFSGIGR;STCIYGGAPK;TIIFVETK;TLAYLLPAIVHINHQPYLER;VLEEANQAINPK	tr|A0A1X7SBZ2|A0A1X7SBZ2_HUMAN Isoform of Q92841, Probable ATP-dependent RNA helicase DDX17 OS=Homo sapiens OX=9606 GN=DDX17 PE=1 SV=1;tr|A0A1W2PQ51|A0A1W2PQ51_HUMAN Isoform of Q92841, Probable ATP-dependent RNA helicase DDX17 OS=Homo sapiens OX=9606 GN=DD	1204;1212;1932;3044;3720;5216;5419;5921;6338;8334;8740;9844;9906;9907;10373;11029;11030;11600;12061;13083;14834;14855;15556;15642;17081	NaN;NaN;NaN;NaN;NaN;NaN;NaN;NaN;NaN;NaN;NaN;NaN;NaN;NaN;NaN;NaN;NaN;NaN;NaN;NaN;NaN;NaN;NaN;NaN;NaN
271	E7EN38;A0A1W2PQ90;Q92878-3;Q92878;Q92878-2;E7ESD9	E7EN38;A0A1W2PQ90;Q92878-3;Q92878;Q92878-2;E7ESD9	DNA repair protein RAD50	RAD50	NaN	NaN	NaN	247470	62511	56782	NaN	NaN	NaN	6	2	2	2	5.5	5.5	5.5	76.557	0.00047529	4.0483	12470000	366770	34	4	2	1	1	8414100	2125400	1930600	5.5	2.7	2.7	2	1	1	2	1	1	2	1	1	DSLIQSLATQLELDGFER;VFQTEAELQEVISDLQSK	tr|E7EN38|E7EN38_HUMAN Isoform of Q92878, DNA repair protein RAD50 (Fragment) OS=Homo sapiens OX=9606 GN=RAD50 PE=1 SV=1;tr|A0A1W2PQ90|A0A1W2PQ90_HUMAN Uncharacterized protein OS=Homo sapiens OX=9606 PE=4 SV=2;sp|Q92878-3|RAD50_HUMAN Isoform of Q92878, Iso	2867;16745	NaN;NaN
272	J3KTD2;A0A1W2PQI7;Q86VV8-2;Q86VV8-4;Q86VV8-3;Q86VV8	J3KTD2;A0A1W2PQI7;Q86VV8-2;Q86VV8-4;Q86VV8-3;Q86VV8	Rotatin	RTTN	NaN	NaN	NaN	NaN	2315000	2774800	NaN	NaN	NaN	6	1	1	1	1.4	1.4	1.4	56.318	0.0051151	2.0162	127240000	5089800	25	2	0	1	1	0	57875000	69370000	0	1.4	1.4	0	1	1	0	1	1	0	1	1	VLAGLIR	tr|J3KTD2|J3KTD2_HUMAN Isoform of Q86VV8, Rotatin OS=Homo sapiens OX=9606 GN=RTTN PE=1 SV=1;tr|A0A1W2PQI7|A0A1W2PQI7_HUMAN Isoform of Q86VV8, Rotatin OS=Homo sapiens OX=9606 GN=RTTN PE=1 SV=1;sp|Q86VV8-2|RTTN_HUMAN Isoform of Q86VV8, Isoform 2 of Rotatin O	17033	NaN
273	G3V2F3;A0A1W2PRH9;A0A1W2PQS5;G3V502;Q9Y5J7	G3V2F3;A0A1W2PRH9;A0A1W2PQS5;G3V502;Q9Y5J7	Mitochondrial import inner membrane translocase subunit Tim9	TIMM9	NaN	NaN	NaN	8674900	3277800	NaN	NaN	NaN	NaN	5	2	2	2	50	50	50	5.1438	0	4.8571	35858000	11953000	3	2	2	0	0	26025000	9833500	0	50	25	0	2	1	0	2	1	0	2	1	0	AAQIPESDQIK;LTETCFLDCVK	tr|G3V2F3|G3V2F3_HUMAN Isoform of Q9Y5J7, Mitochondrial import inner membrane translocase subunit Tim9 (Fragment) OS=Homo sapiens OX=9606 GN=TIMM9 PE=1 SV=1;tr|A0A1W2PRH9|A0A1W2PRH9_HUMAN Isoform of Q9Y5J7, Mitochondrial import inner membrane translocase s	154;10957	NaN;NaN
274	A0A1W2PR79;Q96J02-2;Q96J02	A0A1W2PR79;Q96J02-2;Q96J02	E3 ubiquitin-protein ligase Itchy homolog	ITCH	NaN	NaN	NaN	388020	71658	NaN	NaN	NaN	NaN	3	1	1	1	10.8	10.8	10.8	17.303	0.0029907	2.2126	3677500	459680	8	2	1	1	0	3104200	573260	0	10.8	10.8	0	1	1	0	1	1	0	1	1	0	SDVLLGTAALDIYETLK	tr|A0A1W2PR79|A0A1W2PR79_HUMAN Isoform of Q96J02, E3 ubiquitin-protein ligase Itchy homolog (Fragment) OS=Homo sapiens OX=9606 GN=ITCH PE=1 SV=1;sp|Q96J02-2|ITCH_HUMAN Isoform of Q96J02, Isoform 2 of E3 ubiquitin-protein ligase Itchy homolog OS=Homo sapien	13963	NaN
275	A8MYT4;A0A1W2PS05;Q8NEB9	A8MYT4;A0A1W2PS05;Q8NEB9	Phosphatidylinositol 3-kinase;Phosphatidylinositol 3-kinase catalytic subunit type 3	PIK3C3	NaN	NaN	NaN	NaN	NaN	NaN	NaN	NaN	NaN	3	1	1	1	1	1	1	94.399	0.0064912	1.8932	0	0	42	2	0	1	1	0	0	0	0	1	1	0	1	1	0	1	1	0	1	1	YYLTNQEK	tr|A8MYT4|A8MYT4_HUMAN Isoform of Q8NEB9, Phosphatidylinositol 3-kinase catalytic subunit type 3 OS=Homo sapiens OX=9606 GN=PIK3C3 PE=1 SV=2;tr|A0A1W2PS05|A0A1W2PS05_HUMAN Isoform of Q8NEB9, Phosphatidylinositol 3-kinase catalytic subunit type 3 OS=Homo sa	18692	NaN
276	A0A286YF22;A0A2C9F2M7;O43175;A0A286YFA2;A0A286YFL2;A0A286YFM8;A0A286YF78;A0A286YER3;A0A286YFC8;A0A286YFB2;A0A286YF34;A0A286YFE1;A0A286YFF3;A0A286YFK5	A0A286YF22;A0A2C9F2M7;O43175;A0A286YFA2;A0A286YFL2;A0A286YFM8	D-3-phosphoglycerate dehydrogenase	PHGDH	89915000	113780000	114070000	20665000	12852000	13367000	NaN	NaN	NaN	14	16	16	16	39.2	39.2	39.2	55.938	0	74.897	1277100000	46883000	24	56	17	19	20	560920000	343850000	372360000	27.6	29.5	37.3	11	12	15	11	12	15	11	12	15	AGTGVDNVDLEAATR;ALQSGQCAGAALDVFTEEPPRDR;ALVDHENVISCPHLGASTK;CGEEIAVQFVDMVK;DLPLLLFR;EELIAELQDCEGLIVR;GGIVDEGALLR;GTIQVITQGTSLK;ILQDGGLQVVEK;MQSFGMK;NAGNCLSPAVIVGLLK;QADVNLVNAK;QIPQATASMK;TLGILGLGR;VLISDSLDPCCR;VTADVINAAEK	tr|A0A286YF22|A0A286YF22_HUMAN Isoform of O43175, D-3-phosphoglycerate dehydrogenase OS=Homo sapiens OX=9606 GN=PHGDH PE=1 SV=1;tr|A0A2C9F2M7|A0A2C9F2M7_HUMAN Isoform of O43175, D-3-phosphoglycerate dehydrogenase OS=Homo sapiens OX=9606 GN=PHGDH PE=1 SV=1;	623;1024;1073;1809;2613;3378;5698;6355;7831;11727;11865;12824;13058;15679;17147;17658	NaN;NaN;NaN;NaN;NaN;NaN;NaN;NaN;NaN;NaN;NaN;NaN;NaN;NaN;NaN;NaN
277	R4GNH2;A0A286YF37;Q9UK22	R4GNH2;A0A286YF37;Q9UK22	F-box only protein 2	FBXO2	NaN	NaN	NaN	NaN	927250	564210	NaN	NaN	NaN	3	1	1	1	12.5	12.5	12.5	12.814	0.00043821	3.3115	8948800	1491500	6	1	0	1	0	0	5563500	3385300	0	12.5	12.5	0	1	1	0	1	1	0	1	1	VLAALPAAELVQACR	tr|R4GNH2|R4GNH2_HUMAN Isoform of Q9UK22, F-box only protein 2 (Fragment) OS=Homo sapiens OX=9606 GN=FBXO2 PE=1 SV=1;tr|A0A286YF37|A0A286YF37_HUMAN Isoform of Q9UK22, F-box only protein 2 (Fragment) OS=Homo sapiens OX=9606 GN=FBXO2 PE=1 SV=1;sp|Q9UK22|FBX2	17022	NaN
278	A0A286YF56;Q69YN2;A0A0S2Z5Q6;A0A286YEP9;Q69YN2-3	A0A286YF56;Q69YN2;A0A0S2Z5Q6;A0A286YEP9;Q69YN2-3	CWF19-like protein 1	CWF19L1	NaN	NaN	NaN	982660	677130	830340	NaN	NaN	NaN	5	2	2	2	9.8	9.8	9.8	21.314	0.00043668	3.289	22411000	2490100	9	3	1	1	1	8843900	6094200	7473000	3.6	3.6	9.8	1	1	2	1	1	2	1	1	2	FDILFNR;GVDILLTSPWPK	tr|A0A286YF56|A0A286YF56_HUMAN Isoform of Q69YN2, CWF19-like protein 1 (Fragment) OS=Homo sapiens OX=9606 GN=CWF19L1 PE=1 SV=1;sp|Q69YN2|C19L1_HUMAN CWF19-like protein 1 OS=Homo sapiens OX=9606 GN=CWF19L1 PE=1 SV=2;tr|A0A0S2Z5Q6|A0A0S2Z5Q6_HUMAN Isoform of	4502;6399	NaN;NaN
279	E9PSE5;E9PIA8;A0A2C9F2P4;A0A286YFF7;P50897-2;P50897	E9PSE5;E9PIA8;A0A2C9F2P4;A0A286YFF7;P50897-2;P50897	Palmitoyl-protein thioesterase 1	PPT1	NaN	NaN	NaN	9045800	4020800	3485200	NaN	NaN	NaN	6	1	1	1	17.2	17.2	17.2	10.016	0	7.0132	33104000	16552000	2	3	1	1	1	18092000	8041700	6970500	17.2	17.2	17.2	1	1	1	1	1	1	1	1	1	ETIPLQETSLYTQDR	tr|E9PSE5|E9PSE5_HUMAN Isoform of P50897, Palmitoyl-protein thioesterase 1 OS=Homo sapiens OX=9606 GN=PPT1 PE=1 SV=1;tr|E9PIA8|E9PIA8_HUMAN Isoform of P50897, Palmitoyl-protein thioesterase 1 (Fragment) OS=Homo sapiens OX=9606 GN=PPT1 PE=1 SV=10;tr|A0A2C9F	4199	NaN
280	F8VZV1;A0A286YFF8;Q7Z3U7-2;Q7Z3U7-6;Q7Z3U7-5;Q7Z3U7	F8VZV1;A0A286YFF8;Q7Z3U7-2;Q7Z3U7-6;Q7Z3U7-5;Q7Z3U7	Protein MON2 homolog	MON2	NaN	NaN	NaN	95080	51330	50241	NaN	NaN	NaN	6	1	1	1	0.9	0.9	0.9	117.96	0.001548	2.4228	8849300	196650	45	3	1	1	1	4278600	2309800	2260900	0.9	0.9	0.9	1	1	1	1	1	1	1	1	1	LQLLLLNPLK	tr|F8VZV1|F8VZV1_HUMAN Isoform of Q7Z3U7, Protein MON2 homolog OS=Homo sapiens OX=9606 GN=MON2 PE=1 SV=1;tr|A0A286YFF8|A0A286YFF8_HUMAN Isoform of Q7Z3U7, Protein MON2 homolog OS=Homo sapiens OX=9606 GN=MON2 PE=1 SV=1;sp|Q7Z3U7-2|MON2_HUMAN Isoform of Q7Z3	10672	NaN
281	Q5SWX3;A0A2Q3DQE3;Q13555-10;Q13555-3;Q13555-5;Q13555-4;Q13555-7;Q13555-11;Q13555-9;Q13555-2;Q13555-8;Q13555;Q13555-6	Q5SWX3;A0A2Q3DQE3;Q13555-10;Q13555-3;Q13555-5;Q13555-4;Q13555-7;Q13555-11;Q13555-9;Q13555-2;Q13555-8;Q13555;Q13555-6	Calcium/calmodulin-dependent protein kinase type II subunit gamma	CAMK2G	NaN	NaN	NaN	465290	186420	165120	NaN	NaN	NaN	13	1	1	1	2.5	2.5	2.5	57.796	0	5.355	20421000	816830	25	3	1	1	1	11632000	4660500	4128000	2.5	2.5	2.5	1	1	1	1	1	1	1	1	1	FTDDYQLFEELGK	tr|Q5SWX3|Q5SWX3_HUMAN Isoform of Q13555, Calcium/calmodulin-dependent protein kinase (CaM kinase) II gamma, isoform CRA_n OS=Homo sapiens OX=9606 GN=CAMK2G PE=1 SV=1;tr|A0A2Q3DQE3|A0A2Q3DQE3_HUMAN Isoform of Q13555, Calcium/calmodulin-dependent protein ki	5146	NaN
282	O60313-10;E5KLJ9;O60313-13;O60313-9;O60313;O60313-2;O60313-11;A0A2R8Y3X5;A0A2R8YDM2;A0A2R8YE78;C9JMB8;A0A2R8YGE5;A0A2R8YFD1;A0A2R8Y4Q3;A0A2R8YD53;A0A2R8Y4G4;A0A2R8YE54;H7C141	O60313-10;E5KLJ9;O60313-13;O60313-9;O60313;O60313-2;O60313-11;A0A2R8Y3X5;A0A2R8YDM2;A0A2R8YE78;C9JMB8;A0A2R8YGE5;A0A2R8YFD1;A0A2R8Y4Q3;A0A2R8YD53;A0A2R8Y4G4	Dynamin-like 120 kDa protein, mitochondrial;Dynamin-like 120 kDa protein, form S1	OPA1	13850000	14094000	19062000	155500	182400	287560	NaN	NaN	NaN	18	10	10	10	13.6	13.6	13.6	117.74	0	21.434	89105000	625470	57	20	6	6	8	37886000	25220000	25998000	9.2	8.4	9.3	6	6	7	6	6	7	6	6	7	EGCTVSPETISLNVK;ETIFSISK;GNSSESIEAIREYEEEFFQNSK;GVEVDPSLIK;LDAFIEALHQEK;MVLVDLPGVINTVTSGMAPDTK;NEILDEVISLSQVTPK;SIVTDLVSQMDPHGR;TIFVLTK;TSVLEMIAQAR	sp|O60313-10|OPA1_HUMAN Isoform of O60313, Isoform 4 of Dynamin-like 120 kDa protein, mitochondrial OS=Homo sapiens OX=9606 GN=OPA1;tr|E5KLJ9|E5KLJ9_HUMAN Isoform of O60313, Dynamin-like 120 kDa protein, mitochondrial OS=Homo sapiens OX=9606 GN=OPA1 PE=1 S	3481;4197;6125;6412;9189;11800;11985;14346;15548;16023	NaN;NaN;NaN;NaN;NaN;NaN;NaN;NaN;NaN;NaN
283	A6NNI4;A0A2R8Y478;G8JLH6;P21926	A6NNI4;A0A2R8Y478;G8JLH6;P21926	Tetraspanin;CD9 antigen	CD9	93630000	52406000	58831000	9905500	6993900	6885400	NaN	NaN	NaN	4	2	2	2	22	22	22	17.764	0	10.468	143950000	23785000	5	7	3	2	2	70366000	36945000	36636000	22	22	22	2	2	2	2	2	2	2	2	2	AIHYALNCCGLAGGVEQFISDICPK;KDVLETFTVK	tr|A6NNI4|A6NNI4_HUMAN Isoform of P21926, Tetraspanin OS=Homo sapiens OX=9606 GN=CD9 PE=1 SV=1;tr|A0A2R8Y478|A0A2R8Y478_HUMAN Isoform of P21926, Tetraspanin OS=Homo sapiens OX=9606 GN=CD9 PE=1 SV=1;tr|G8JLH6|G8JLH6_HUMAN Isoform of P21926, Tetraspanin OS=H	742;8547	NaN;NaN
284	A0A2R8Y484;Q08722-2;Q08722-3;Q08722-4;Q08722	A0A2R8Y484;Q08722-2;Q08722-3;Q08722-4;Q08722	Leukocyte surface antigen CD47	CD47	NaN	NaN	NaN	1872500	1369400	1023600	NaN	NaN	NaN	5	1	1	1	4.4	4.4	4.4	20.313	0.0047759	2.0559	38390000	4265500	9	3	1	1	1	16853000	12324000	9212700	4.4	4.4	4.4	1	1	1	1	1	1	1	1	1	IEVSQLLK	tr|A0A2R8Y484|A0A2R8Y484_HUMAN Isoform of Q08722, Leukocyte surface antigen CD47 (Fragment) OS=Homo sapiens OX=9606 GN=CD47 PE=1 SV=1;sp|Q08722-2|CD47_HUMAN Isoform of Q08722, Isoform OA3-293 of Leukocyte surface antigen CD47 OS=Homo sapiens OX=9606 GN=CD4	7310	NaN
285	A0A2R8Y5E4;A0A2R8YFK2;A0A2R8Y6M6;A0A2R8Y4C2;A0A2R8YFS8;A0A2R8Y8C4;A0A2R8Y5C9;A0A2R8Y596;P56945-4;P56945-5;P56945-8;P56945;P56945-7;P56945-3;P56945-2;P56945-6	A0A2R8Y5E4;A0A2R8YFK2;A0A2R8Y6M6;A0A2R8Y4C2;A0A2R8YFS8;A0A2R8Y8C4;A0A2R8Y5C9;A0A2R8Y596;P56945-4;P56945-5;P56945-8;P56945;P56945-7;P56945-3;P56945-2;P56945-6	Breast cancer anti-estrogen resistance protein 1	BCAR1	NaN	NaN	NaN	226890	83173	97248	NaN	NaN	NaN	16	2	2	2	4.3	4.3	4.3	77.76	0	5.4673	19013000	97248	39	4	1	1	2	8848600	3243800	6921100	2.1	2.1	4.3	1	1	2	1	1	2	1	1	2	ALYDNVAESPDELSFR;SQVTHYSNLLCDLLR	tr|A0A2R8Y5E4|A0A2R8Y5E4_HUMAN Isoform of P56945, Breast cancer anti-estrogen resistance protein 1 OS=Homo sapiens OX=9606 GN=BCAR1 PE=1 SV=1;tr|A0A2R8YFK2|A0A2R8YFK2_HUMAN Isoform of P56945, Breast cancer anti-estrogen resistance protein 1 OS=Homo sapiens	1095;14749	NaN;NaN
286	Q969G3;A0A2U3TZQ7;B4DGM3;A0A2R8Y855;A0A2R8YES3;A0A2R8Y4T4;K7EMQ8;A0A2R8Y7I9;A0A2R8Y7U4;J3QKS7;A0A2R8Y765;Q969G3-5;Q969G3-6;Q969G3-3;Q969G3-2;Q969G3-4;J3QR61;H7C048	Q969G3;A0A2U3TZQ7;B4DGM3;A0A2R8Y855;A0A2R8YES3;A0A2R8Y4T4;K7EMQ8;A0A2R8Y7I9;A0A2R8Y7U4;J3QKS7;A0A2R8Y765;Q969G3-5;Q969G3-6;Q969G3-3;Q969G3-2;Q969G3-4;J3QR61;H7C048	SWI/SNF-related matrix-associated actin-dependent regulator of chromatin subfamily E member 1	SMARCE1	NaN	NaN	NaN	457440	238900	170690	NaN	NaN	NaN	18	2	2	2	6.8	6.8	6.8	46.649	0	4.973	17341000	867030	20	2	0	1	1	9148800	4777900	3413900	3.6	3.2	3.2	1	1	1	1	1	1	1	1	1	IAAEIAQAEEQAR;LISEILSESVVPDVR	sp|Q969G3|SMCE1_HUMAN SWI/SNF-related matrix-associated actin-dependent regulator of chromatin subfamily E member 1 OS=Homo sapiens OX=9606 GN=SMARCE1 PE=1 SV=2;tr|A0A2U3TZQ7|A0A2U3TZQ7_HUMAN Isoform of Q969G3, SWI/SNF-related matrix-associated actin-depen	7008;9914	NaN;NaN
287	A0A2R8Y804;A0A2R8Y543;A0A2R8Y5C3;A0A2R8Y750;A0A2R8Y5Z1;B4DGU4;A0A2R8YCH5;A0A2R8Y7Z0;A0A2R8Y5A3;P35222;A0A2R8Y6G0;A0A2R8Y815;A0A2R8YG06	A0A2R8Y804;A0A2R8Y543;A0A2R8Y5C3;A0A2R8Y750;A0A2R8Y5Z1;B4DGU4;A0A2R8YCH5;A0A2R8Y7Z0;A0A2R8Y5A3;P35222;A0A2R8Y6G0	Catenin beta-1	CTNNB1	23537000	24396000	16108000	931180	605390	339570	NaN	NaN	NaN	13	10	6	6	18.9	14.4	14.4	77.206	0	25.915	152650000	1876100	42	19	6	7	6	83006000	44167000	25474000	16.5	16.8	9.4	9	8	5	6	6	5	6	6	5	EGLLAIFK;HAVVNLINYQDDAELATR;LHYGLPVVVK;LIILASGGPQALVNIMR;LLWTTSR;LVQLLVR;MEEIVEGCTGALHILAR;NEGVATYAAAVLFR;VAAGVLCELAQDK;VAAGVLCELAQDKEAAEAIEAEGATAPLTELLHSR	tr|A0A2R8Y804|A0A2R8Y804_HUMAN Isoform of P35222, Catenin beta-1 OS=Homo sapiens OX=9606 GN=CTNNB1 PE=1 SV=1;tr|A0A2R8Y543|A0A2R8Y543_HUMAN Isoform of P35222, Catenin beta-1 OS=Homo sapiens OX=9606 GN=CTNNB1 PE=1 SV=1;tr|A0A2R8Y5C3|A0A2R8Y5C3_HUMAN Isoform	3530;6576;9819;9879;10332;11206;11454;11979;16269;16270	NaN;NaN;NaN;NaN;NaN;NaN;NaN;NaN;NaN;NaN
288	A0A2R8Y549;Q8NI35-4;Q8NI35-3;Q8NI35-2;Q8NI35;A0A0U1RR46;A0A0X1KG69;A0A087WUZ6;Q8NI35-5	A0A2R8Y549;Q8NI35-4;Q8NI35-3;Q8NI35-2;Q8NI35;A0A0U1RR46;A0A0X1KG69;A0A087WUZ6;Q8NI35-5	InaD-like protein	INADL	NaN	NaN	NaN	16952	5701.1	78720	NaN	NaN	NaN	9	2	2	2	1.4	1.4	1.4	204.7	0	4.3593	9022200	95672	89	4	2	1	1	1508700	507400	7006000	1	1	0.5	1	1	1	1	1	1	1	1	1	LQVLQVLDR;NAGNPVVFIVQSLSSTPR	tr|A0A2R8Y549|A0A2R8Y549_HUMAN Isoform of Q8NI35, InaD-like protein OS=Homo sapiens OX=9606 GN=PATJ PE=1 SV=1;sp|Q8NI35-4|INADL_HUMAN Isoform of Q8NI35, Isoform 4 of InaD-like protein OS=Homo sapiens OX=9606 GN=PATJ;sp|Q8NI35-3|INADL_HUMAN Isoform of Q8NI3	10735;11866	NaN;NaN
289	A0A2R8Y566;Q9P260;Q9P260-2;A0A075B785	A0A2R8Y566;Q9P260;Q9P260-2;A0A075B785	LisH domain and HEAT repeat-containing protein KIAA1468	KIAA1468	NaN	NaN	NaN	45294	NaN	NaN	NaN	NaN	NaN	4	2	2	2	2.4	2.4	2.4	134.59	0.0004529	3.579	3218900	45294	57	1	1	0	0	3218900	0	0	2.4	0	0	2	0	0	2	0	0	2	0	0	ALNFLVNEFLLK;IATIPAFGTIMETVIQR	tr|A0A2R8Y566|A0A2R8Y566_HUMAN Isoform of Q9P260, RAB11-binding and LisH domain, coiled-coil and HEAT repeat-containing OS=Homo sapiens OX=9606 GN=RELCH PE=1 SV=1;sp|Q9P260|RELCH_HUMAN RAB11-binding protein RELCH OS=Homo sapiens OX=9606 GN=RELCH PE=1 SV=2;	998;7087	NaN;NaN
290	H0YH87;A0A2R8Y7P6;A0A2R8YDM9;F8VQP2;F8WB06;V9GY86;A0A2R8Y5A6;Q99700-2;Q99700-5;Q99700-4;Q99700;F8VVY6;F8VRK6	H0YH87;A0A2R8Y7P6;A0A2R8YDM9;F8VQP2;F8WB06;V9GY86;A0A2R8Y5A6;Q99700-2;Q99700-5;Q99700-4;Q99700;F8VVY6;F8VRK6	Ataxin-2	ATXN2	NaN	NaN	NaN	346490	110860	86802	NaN	NaN	NaN	13	2	2	2	3.1	3.1	3.1	90.166	0.00044464	3.4399	19045000	544150	35	0	0	0	0	12127000	3880000	3038100	3.1	1.8	1.3	2	1	1	2	1	1	2	1	1	ANQLAEEIESSAQYK;REEIMESILFK	tr|H0YH87|H0YH87_HUMAN Isoform of Q99700, Ataxin-2 OS=Homo sapiens OX=9606 GN=ATXN2 PE=1 SV=2;tr|A0A2R8Y7P6|A0A2R8Y7P6_HUMAN Isoform of Q99700, Ataxin-2 OS=Homo sapiens OX=9606 GN=ATXN2 PE=1 SV=1;tr|A0A2R8YDM9|A0A2R8YDM9_HUMAN Isoform of Q99700, Ataxin-2 O	1160;13466	NaN;NaN
291	A0A2R8YEZ4;A0A2R8Y5D3;O15160-2;O15160;H0Y723;A0A2R8Y8D6;A0A2R8YEY5;E7EQB9;D6RDJ3	A0A2R8YEZ4;A0A2R8Y5D3;O15160-2;O15160;H0Y723;A0A2R8Y8D6;A0A2R8YEY5;E7EQB9	DNA-directed RNA polymerases I and III subunit RPAC1	POLR1C	NaN	NaN	NaN	1432100	44028	35845	NaN	NaN	NaN	9	3	3	3	14	14	14	34.958	0	7.2403	22680000	1512000	15	4	2	1	1	21482000	660410	537680	14	6.8	6.8	3	1	1	3	1	1	3	1	1	ILLAEVPTMAVEK;LLPDITLLEPVEGEAAEELSR;VVLGEFGVR	tr|A0A2R8YEZ4|A0A2R8YEZ4_HUMAN Isoform of O15160, DNA-directed RNA polymerases I and III subunit RPAC1 OS=Homo sapiens OX=9606 GN=POLR1C PE=1 SV=1;tr|A0A2R8Y5D3|A0A2R8Y5D3_HUMAN Isoform of O15160, DNA-directed RNA polymerases I and III subunit RPAC1 OS=Hom	7787;10230;17842	NaN;NaN;NaN
292	A0A2R8Y5M6;P51572;P51572-2	A0A2R8Y5M6;P51572;P51572-2	B-cell receptor-associated protein 31	BCAP31	NaN	NaN	NaN	1314500	NaN	NaN	NaN	NaN	NaN	3	1	1	1	4.3	4.3	4.3	24.112	0.0019128	2.3459	17088000	1314500	13	1	1	0	0	17088000	0	0	4.3	0	0	1	0	0	1	0	0	1	0	0	AENQVLAMR	tr|A0A2R8Y5M6|A0A2R8Y5M6_HUMAN Isoform of P51572, B-cell receptor-associated protein 31 OS=Homo sapiens OX=9606 GN=BCAP31 PE=1 SV=1;sp|P51572|BAP31_HUMAN B-cell receptor-associated protein 31 OS=Homo sapiens OX=9606 GN=BCAP31 PE=1 SV=3;sp|P51572-2|BAP31_HU	420	NaN
293	A0A2R8YFL4;A0A2R8Y6Q1;A0A2R8Y7E7;A0A2R8YHI9;A0A2R8Y5Q8;Q15813;Q15813-2;A0A2U3TZJ6;A0A2R8Y897;A0A2R8Y6L2;A0A2R8Y4E7;A0A2R8Y784;A0A2R8YER9;A0A2R8Y4V6;A0A2R8Y809	A0A2R8YFL4;A0A2R8Y6Q1;A0A2R8Y7E7;A0A2R8YHI9;A0A2R8Y5Q8;Q15813;Q15813-2;A0A2U3TZJ6	Tubulin-specific chaperone E	TBCE	NaN	NaN	NaN	168210	127880	118070	NaN	NaN	NaN	15	4	4	4	20.3	20.3	20.3	40.941	0	11.48	17639000	168210	24	4	2	1	1	11736000	3069000	2833700	13.8	6.5	6.5	3	1	1	3	1	1	3	1	1	LEQLILSDTGISSLHFPDAGIGCK;LLDLSSNQLIDENQLYLIAHLPR;LLIIASIGQLK;NLLSSWDEVIHIADQLR	tr|A0A2R8YFL4|A0A2R8YFL4_HUMAN Isoform of Q15813, Tubulin-specific chaperone E (Fragment) OS=Homo sapiens OX=9606 GN=TBCE PE=1 SV=1;tr|A0A2R8Y6Q1|A0A2R8Y6Q1_HUMAN Isoform of Q15813, Tubulin-specific chaperone E OS=Homo sapiens OX=9606 GN=TBCE PE=1 SV=1;tr|	9433;10032;10156;12280	NaN;NaN;NaN;NaN
294	A0A2R8Y5S7;P35241;P35241-5;A0A2R8Y7M3;P35241-4;P35241-3;E9PNV3;A0A2R8Y5P0;E9PQ82;P35241-2;A0A2R8Y4H6	A0A2R8Y5S7;P35241;P35241-5;A0A2R8Y7M3;P35241-4	Radixin	RDX	49605000	47400000	46030000	4431900	1533900	1491700	NaN	NaN	NaN	11	24	9	9	39.3	20.5	20.5	69.335	0	43.651	340310000	7457500	31	28	15	4	9	210860000	67394000	62058000	33.9	28.1	35.8	18	17	21	8	4	7	8	4	7	AFAAQEDLEK;APDFVFYAPR;EAILNDEIYCPPETAVLLASYAVQAK;EIHKPGYLANDR;ENPLQFK;FFPEDVSEELIQEITQR;FVIKPIDK;IALLEEAK;IGFPWSEIR;ILALCMGNHELYMR;IQNWHEEHR;KAPDFVFYAPR;KEEEATEWQHK;KENPLQFK;KFVIKPIDK;KPDTIEVQQMK;LFFLQVK;NISFNDK;NQEQLAAELAEFTAK;PKPINVR;QLFDQVVK;QLQALSSELAQAR;RKPDTIEVQQMK;VTTMDAELEFAIQPNTTGK	tr|A0A2R8Y5S7|A0A2R8Y5S7_HUMAN Isoform of P35241, Radixin OS=Homo sapiens OX=9606 GN=RDX PE=1 SV=1;sp|P35241|RADI_HUMAN Radixin OS=Homo sapiens OX=9606 GN=RDX PE=1 SV=1;sp|P35241-5|RADI_HUMAN Isoform of P35241, Isoform 5 of Radixin OS=Homo sapiens OX=9606	455;1178;3165;3636;3977;4616;5214;7055;7425;7686;8066;8499;8566;8602;8645;8819;9502;12181;12441;12752;13111;13156;13580;17753	NaN;NaN;NaN;NaN;NaN;NaN;NaN;NaN;NaN;NaN;NaN;NaN;NaN;NaN;NaN;NaN;NaN;NaN;NaN;NaN;NaN;NaN;NaN;NaN
295	A0A2R8Y653;Q9BZX2;Q9BZX2-2	A0A2R8Y653;Q9BZX2	Uridine-cytidine kinase 2	UCK2	19204000	NaN	21927000	790770	NaN	390080	NaN	NaN	NaN	3	4	4	4	29.6	29.6	29.6	27.408	0	21.391	71811000	1180900	14	6	3	0	3	49558000	0	22254000	29.6	0	18.8	4	0	3	4	0	3	4	0	3	GADNLVAINLIVQHIQDILNGGPSKR;GQFNFDHPDAFDNELILK;IVQLLGQNEVDYR;TVQIPVYDFVSHSR	tr|A0A2R8Y653|A0A2R8Y653_HUMAN Isoform of Q9BZX2, Uridine-cytidine kinase 2 OS=Homo sapiens OX=9606 GN=UCK2 PE=1 SV=1;sp|Q9BZX2|UCK2_HUMAN Uridine-cytidine kinase 2 OS=Homo sapiens OX=9606 GN=UCK2 PE=1 SV=1	5311;6216;8396;16182	NaN;NaN;NaN;NaN
296	A0A2R8YFH0;E9PHA6;A0A2R8Y6P0;A0A2R8YG02;P43246-2;P43246;A0A2R8Y7S8;A0A2R8Y713	A0A2R8YFH0;E9PHA6;A0A2R8Y6P0;A0A2R8YG02;P43246-2;P43246;A0A2R8Y7S8	DNA mismatch repair protein Msh2	MSH2	NaN	5665600	5409600	265260	103850	120140	NaN	NaN	NaN	8	6	6	6	10.3	10.3	10.3	102.86	0	12.977	23865000	489250	43	7	3	2	2	11406000	5907000	6552000	4.9	5.7	7.3	3	3	4	3	3	4	3	3	4	ALNLFQGSVEDTTGSQSLAALLNK;DSLIIIDELGR;ECVLPGGETAGDMGK;LLLAVFVTPLTDLR;LNLVEAFVEDAELR;LYQGINQLPNVIQALEK	tr|A0A2R8YFH0|A0A2R8YFH0_HUMAN Isoform of P43246, DNA mismatch repair protein OS=Homo sapiens OX=9606 GN=MSH2 PE=1 SV=1;tr|E9PHA6|E9PHA6_HUMAN Isoform of P43246, DNA mismatch repair protein OS=Homo sapiens OX=9606 GN=MSH2 PE=1 SV=1;tr|A0A2R8Y6P0|A0A2R8Y6P0	999;2866;3268;10171;10431;11345	NaN;NaN;NaN;NaN;NaN;NaN
297	P62263;A0A2R8Y811;E5RH77	P62263;A0A2R8Y811;E5RH77	40S ribosomal protein S14	RPS14	112580000	139400000	155260000	56171000	42041000	44960000	NaN	NaN	NaN	3	6	6	6	64.9	64.9	64.9	16.273	0	45.15	1000800000	143170000	4	18	5	6	7	412730000	283150000	304950000	56.3	37.7	37.7	4	5	5	4	5	5	4	5	5	ADRDESSPYAAMLAAQDVAQR;ELGITALHIK;IEDVTPIPSDSTR;KEEQVISLGPQVAEGENVFGVCHIFASFNDTFVHVTDLSGK;TKTPGPGAQSALR;TPGPGAQSALR	sp|P62263|RS14_HUMAN 40S ribosomal protein S14 OS=Homo sapiens OX=9606 GN=RPS14 PE=1 SV=3;tr|A0A2R8Y811|A0A2R8Y811_HUMAN Isoform of P62263, 40S ribosomal protein S14 (Fragment) OS=Homo sapiens OX=9606 GN=RPS14 PE=1 SV=1;tr|E5RH77|E5RH77_HUMAN Isoform of P6	320;3777;7231;8577;15622;15868	NaN;NaN;NaN;NaN;NaN;NaN
298	A0A2R8Y851;P62273;P62273-2;A0A2R8Y6P7;A0A087WTT6	A0A2R8Y851;P62273;P62273-2;A0A2R8Y6P7;A0A087WTT6	40S ribosomal protein S29	RPS29	45145000	48665000	59173000	19252000	9652900	11101000	NaN	NaN	NaN	5	2	2	2	20.7	20.7	20.7	10.256	0	16.721	196200000	40006000	4	7	3	2	2	113190000	38612000	44404000	20.7	20.7	20.7	2	2	2	2	2	2	2	2	2	GHQQLYWSHPR;YGLNMCR	tr|A0A2R8Y851|A0A2R8Y851_HUMAN Isoform of P62273, 40S ribosomal protein S29 OS=Homo sapiens OX=9606 GN=RPS29 PE=1 SV=1;sp|P62273|RS29_HUMAN 40S ribosomal protein S29 OS=Homo sapiens OX=9606 GN=RPS29 PE=1 SV=2;sp|P62273-2|RS29_HUMAN Isoform of P62273, Isofo	5768;18312	NaN;NaN
299	A0A2R8Y871;Q96L92-3;Q96L92	A0A2R8Y871;Q96L92-3;Q96L92	Sorting nexin-27	SNX27	NaN	NaN	NaN	3489700	NaN	NaN	NaN	NaN	NaN	3	1	1	1	18.6	18.6	18.6	12.909	0.0022548	2.2554	20938000	3489700	6	2	2	0	0	20938000	0	0	18.6	0	0	1	0	0	1	0	0	1	0	0	SINGELYAPLQHVSAVLPGGAADR	tr|A0A2R8Y871|A0A2R8Y871_HUMAN Isoform of Q96L92, Sorting nexin-27 OS=Homo sapiens OX=9606 GN=SNX27 PE=1 SV=1;sp|Q96L92-3|SNX27_HUMAN Isoform of Q96L92, Isoform 2 of Sorting nexin-27 OS=Homo sapiens OX=9606 GN=SNX27;sp|Q96L92|SNX27_HUMAN Sorting nexin-27 O	14292	NaN
300	H3BSK8;A0A2R8Y880;Q7Z6E9-2;Q7Z6E9	H3BSK8;A0A2R8Y880;Q7Z6E9-2;Q7Z6E9	E3 ubiquitin-protein ligase RBBP6	RBBP6	NaN	NaN	NaN	29626	NaN	NaN	NaN	NaN	NaN	4	1	1	1	3	3	3	113.49	0.00047574	4.0509	1096200	29626	37	1	1	0	0	1096200	0	0	3	0	0	1	0	0	1	0	0	1	0	0	GYQVPVLGTPSLLGQSLLHGQLIPTTGPVR	tr|H3BSK8|H3BSK8_HUMAN Isoform of Q7Z6E9, E3 ubiquitin-protein ligase RBBP6 (Fragment) OS=Homo sapiens OX=9606 GN=RBBP6 PE=1 SV=1;tr|A0A2R8Y880|A0A2R8Y880_HUMAN Isoform of Q7Z6E9, E3 ubiquitin-protein ligase RBBP6 (Fragment) OS=Homo sapiens OX=9606 GN=RBBP	6542	NaN
301	A0A2R8Y891;P08237;P08237-3;F8VZI0;P08237-2;F8VX13;F8VNX2;F8VZQ1;F8VP00	A0A2R8Y891;P08237;P08237-3;F8VZI0;P08237-2	ATP-dependent 6-phosphofructokinase, muscle type	PFKM	NaN	NaN	NaN	457660	112700	85440	NaN	NaN	NaN	9	5	3	3	6.6	4.5	4.5	96.907	0	7.7947	34928000	655800	38	5	3	1	1	27398000	4282700	3246700	6.6	3.4	3.4	5	3	3	3	1	1	3	1	1	GGTPSAFDR;IFANTPDSGCVLGMR;SEWSDLLSDLQK;TFVLEVMGR;VLVVHDGFEGLAK	tr|A0A2R8Y891|A0A2R8Y891_HUMAN Isoform of P08237, ATP-dependent 6-phosphofructokinase OS=Homo sapiens OX=9606 GN=PFKM PE=1 SV=1;sp|P08237|PFKAM_HUMAN ATP-dependent 6-phosphofructokinase, muscle type OS=Homo sapiens OX=9606 GN=PFKM PE=1 SV=2;sp|P08237-3|PFK	5736;7320;14057;15385;17289	NaN;NaN;NaN;NaN;NaN
302	A0A2R8YD90;A0A2R8YCS7;Q9Y3Z3-3;Q9Y3Z3-4;Q9Y3Z3;A0A2R8Y6J9;A0A2R8YF51;A0A2R8Y5D2	A0A2R8YD90;A0A2R8YCS7;Q9Y3Z3-3;Q9Y3Z3-4;Q9Y3Z3;A0A2R8Y6J9;A0A2R8YF51;A0A2R8Y5D2	Deoxynucleoside triphosphate triphosphohydrolase SAMHD1	SAMHD1	5549800	3158900	2564700	217160	60902	48145	NaN	NaN	NaN	8	2	2	2	8.7	8.7	8.7	47.296	0	6.4061	15585000	326210	24	6	2	2	2	10649000	2803700	2133000	8.7	8.7	8.7	2	2	2	2	2	2	2	2	2	FEHSLGVGYLAGCLVHALGEK;VGNIIDTMITDAFLK	tr|A0A2R8YD90|A0A2R8YD90_HUMAN Isoform of Q9Y3Z3, Deoxynucleoside triphosphate triphosphohydrolase SAMHD1 (Fragment) OS=Homo sapiens OX=9606 GN=SAMHD1 PE=1 SV=1;tr|A0A2R8YCS7|A0A2R8YCS7_HUMAN Isoform of Q9Y3Z3, Deoxynucleoside triphosphate triphosphohydrol	4557;16823	NaN;NaN
303	A0A2R8YD50;P51659;E7ER27;E7EWE5;P51659-3;P51659-2;A0A2R8Y7L2;G5E9S2;E7ET17;E7EPL9;A0A2R8YDT8;A0A2R8YF45;A0A2R8YEG2;A0A2R8Y7W2	A0A2R8YD50;P51659;E7ER27;E7EWE5;P51659-3;P51659-2;A0A2R8Y7L2;G5E9S2;E7ET17	Peroxisomal multifunctional enzyme type 2;(3R)-hydroxyacyl-CoA dehydrogenase;Enoyl-CoA hydratase 2	HSD17B4	66131000	52262000	47829000	5074100	1926300	1923000	NaN	NaN	NaN	14	13	13	13	30.1	30.1	30.1	76.837	0	68.114	488490000	8923400	41	34	12	11	11	280720000	111610000	96158000	25	22.9	21.2	10	10	9	10	10	9	10	10	9	ATSTATSGFAGAIGQK;AVANYDSVEEGEK;FIYEGSSDFSCLPTFGVIIGQK;GALVVVNDLGGDFK;ICDFENASKPQSIQESTGSIIEVLSK;IDSEGGVSANHTSR;IDVVVNNAGILR;ISDEDWDIIHR;LGLLGLANSLAIEGR;SMMGGGLAEIPGLSINFAK;VAVAIPNRPPDAVLTDTTSLNQAALYR;VLQQFADNDVSR;VVLVTGAGAGLGR	tr|A0A2R8YD50|A0A2R8YD50_HUMAN Isoform of P51659, Peroxisomal multifunctional enzyme type 2 OS=Homo sapiens OX=9606 GN=HSD17B4 PE=1 SV=1;sp|P51659|DHB4_HUMAN Peroxisomal multifunctional enzyme type 2 OS=Homo sapiens OX=9606 GN=HSD17B4 PE=1 SV=3;tr|E7ER27|E	1514;1546;4792;5349;7106;7198;7213;8118;9703;14579;16389;17218;17857	NaN;NaN;NaN;NaN;NaN;NaN;NaN;NaN;NaN;NaN;NaN;NaN;NaN
304	P68400;E7EU96;A0A2R8YD58;A0A2R8YF43;A0A2R8YFU2;A0A2R8YDP2;A0A2R8Y5A0;Q8NEV1;P68400-2;A0A2R8Y4D6;A0A2R8Y4H0;V9GYA2;A0A2R8YEW1;A0A087WY74;A0A2R8YCK2;A0A2R8Y3W6;A0A2R8Y7T1;A0A2R8YDY7;A0A2R8YF47;V9GY80;A0A2R8YEL7;A0A2R8Y797;A0A2R8YCC9	P68400;E7EU96;A0A2R8YD58;A0A2R8YF43;A0A2R8YFU2;A0A2R8YDP2;A0A2R8Y5A0;Q8NEV1;P68400-2	Casein kinase II subunit alpha;Casein kinase II subunit alpha 3	CSNK2A1;CSNK2A3	51474000	71216000	68761000	1426500	1777400	1014200	NaN	NaN	NaN	23	9	9	9	31.7	31.7	31.7	45.143	0	33.629	336600000	4218100	18	15	2	7	6	167350000	93916000	75339000	17.6	17.6	14.6	4	6	5	4	6	5	4	6	5	EAMEHPYFYTVVK;EPFFHGHDNYDQLVR;FNDILGR;FVHSENQHLVSPEALDFLDK;GGPNIITLADIVK;GGPNIITLADIVKDPVSR;LIDWGLAEFYHPGQEYNVR;VLGTEDLYDYIDKYNIELDPR;VYTDVNTHRPR	sp|P68400|CSK21_HUMAN Casein kinase II subunit alpha OS=Homo sapiens OX=9606 GN=CSNK2A1 PE=1 SV=1;tr|E7EU96|E7EU96_HUMAN Isoform of P68400, Casein kinase II subunit alpha OS=Homo sapiens OX=9606 GN=CSNK2A1 PE=1 SV=1;tr|A0A2R8YD58|A0A2R8YD58_HUMAN Isoform o	3195;4000;4942;5209;5715;5716;9850;17126;17963	NaN;NaN;NaN;NaN;NaN;NaN;NaN;NaN;NaN
305	A0A2R8YFH5;Q15437;Q5QPE2;A0A2R8Y633;A0A2R8Y7S7;A0A2R8YF30;Q5QPE1	A0A2R8YFH5;Q15437;Q5QPE2	Protein transport protein Sec23B	SEC23B	NaN	NaN	NaN	150580	60469	97297	NaN	NaN	NaN	7	7	4	4	13.6	8.8	8.8	84.472	0	12.965	20791000	308340	37	6	3	1	2	14953000	2237400	3600000	11.9	6.5	8.3	6	4	5	3	1	2	3	1	2	ATYLEFIQQNEER;AVLNPLCQVDYR;FSWNVWPSSR;HLLQAPLDDAQEILQAR;IDMNLTDLLGELQR;MVVPLACLLTPLK;STGVALSIAVGLLEGTFPNTGAR	tr|A0A2R8YFH5|A0A2R8YFH5_HUMAN Isoform of Q15437, Protein transport protein SEC23 OS=Homo sapiens OX=9606 GN=SEC23B PE=1 SV=1;sp|Q15437|SC23B_HUMAN Protein transport protein Sec23B OS=Homo sapiens OX=9606 GN=SEC23B PE=1 SV=2;tr|Q5QPE2|Q5QPE2_HUMAN Isoform	1528;1629;5141;6778;7179;11817;14873	NaN;NaN;NaN;NaN;NaN;NaN;NaN
306	Q14155-1;B1ALK7;Q14155-5;A0A2R8YG42	Q14155-1;B1ALK7;Q14155-5;A0A2R8YG42		ARHGEF7	NaN	NaN	NaN	NaN	NaN	38370	NaN	NaN	NaN	4	1	1	1	2.6	2.6	2.6	73.139	0.0099291	1.7635	1458000	38370	38	1	0	0	1	0	0	1458000	0	0	2.6	0	0	1	0	0	1	0	0	1	SLVDTVYALKDEVQELR	sp|Q14155-1|ARHG7_HUMAN Isoform of Q14155, Isoform 1 of Rho guanine nucleotide exchange factor 7 OS=Homo sapiens OX=9606 GN=ARHGEF7;tr|B1ALK7|B1ALK7_HUMAN Isoform of Q14155, Rho guanine nucleotide exchange factor 7 OS=Homo sapiens OX=9606 GN=ARHGEF7 PE=1 S	14546	NaN
307	A0A2R8YGH5;H7C1E4;P61966-2;P61966	A0A2R8YGH5;H7C1E4;P61966-2;P61966	AP-1 complex subunit sigma-1A	AP1S1	NaN	NaN	NaN	NaN	NaN	247460	NaN	NaN	NaN	4	1	1	1	4.5	4.5	4.5	18.602	0.0065194	1.9249	2474600	247460	10	1	0	0	1	0	0	2474600	0	0	4.5	0	0	1	0	0	1	0	0	1	FMLLFSR	tr|A0A2R8YGH5|A0A2R8YGH5_HUMAN Isoform of P61966, AP complex subunit sigma OS=Homo sapiens OX=9606 GN=AP1S1 PE=1 SV=1;tr|H7C1E4|H7C1E4_HUMAN Isoform of P61966, AP complex subunit sigma (Fragment) OS=Homo sapiens OX=9606 GN=AP1S1 PE=1 SV=1;sp|P61966-2|AP1S1	4924	NaN
308	A0A2R8YH03;Q5VWN6;Q5VWN6-2	A0A2R8YH03;Q5VWN6;Q5VWN6-2	Protein FAM208B	FAM208B	22361000	45628000	31308000	190610	161730	112450	NaN	NaN	NaN	3	2	2	2	1.1	1.1	1.1	293.55	0.0011862	2.552	111910000	464790	124	7	2	3	2	40991000	46215000	24707000	0.4	1.1	0.4	1	2	1	1	2	1	1	2	1	GFFILLTSSALLSEPDFGGK;IVLSCDDSVK	tr|A0A2R8YH03|A0A2R8YH03_HUMAN Isoform of Q5VWN6, Protein FAM208B OS=Homo sapiens OX=9606 GN=FAM208B PE=1 SV=1;sp|Q5VWN6|F208B_HUMAN Protein FAM208B OS=Homo sapiens OX=9606 GN=FAM208B PE=1 SV=1;sp|Q5VWN6-2|F208B_HUMAN Isoform of Q5VWN6, Isoform 2 of Protei	5592;8380	NaN;NaN
309	A0A2U3TZH3;Q05639;A0A2R8Y488;A0A2R8Y660;A0A2R8YDN5	A0A2U3TZH3;Q05639	Elongation factor 1-alpha 2	EEF1A2	387830000	213990000	189390000	7863400	3428800	1658500	NaN	NaN	NaN	5	19	9	9	54	28.8	28.8	54.34	0	63.77	1395100000	12951000	23	42	16	12	14	990680000	230600000	173870000	45.8	47.4	46.2	16	16	16	7	6	6	7	6	6	EGNASGVSLLEALDTILPPTRPTDK;EGNASGVSLLEALDTILPPTRPTDKPLR;EHALLAYTLGVK;EVSAYIK;IGGIGTVPVGR;IGYNPATVPFVPISGWHGDNMLEPSPNMPWFK;KEGNASGVSLLEALDTILPPTRPTDK;LPLQDVYK;MDSTEPAYSEK;NMITGTSQADCAVLIVAAGVGEFEAGISK;PLRLPLQDVYK;QLIVGVNK;QTVAVGVIK;SGDAAIVEMVPGKPMCVESFSQYPPLGR;STTTGHLIYK;SVEMHHEALSEALPGDNVGFNVK;THINIVVIGHVDSGK;VETGILRPGMVVTFAPVNITTEVK;YYITIIDAPGHR	tr|A0A2U3TZH3|A0A2U3TZH3_HUMAN Isoform of Q05639, Elongation factor 1-alpha OS=Homo sapiens OX=9606 GN=EEF1A2 PE=1 SV=1;sp|Q05639|EF1A2_HUMAN Elongation factor 1-alpha 2 OS=Homo sapiens OX=9606 GN=EEF1A2 PE=1 SV=1	3540;3541;3575;4307;7431;7500;8585;10537;11430;12349;12763;13122;13315;14126;14910;14940;15484;16659;18690	NaN;NaN;NaN;NaN;NaN;NaN;NaN;NaN;NaN;NaN;NaN;NaN;NaN;NaN;NaN;NaN;NaN;NaN;NaN
310	P10911-3;P10911-5;A0A2U3TZL4	P10911-3;P10911-5;A0A2U3TZL4			NaN	NaN	NaN	437500	254100	264260	NaN	NaN	NaN	3	1	1	1	1	1	1	114.37	0.0029806	2.1858	46837000	955870	49	2	0	1	1	21438000	12451000	12949000	1	1	1	1	1	1	1	1	1	1	1	1	VLTYLTSIAR	sp|P10911-3|MCF2_HUMAN Isoform of P10911, Isoform 3 of Proto-oncogene DBL OS=Homo sapiens OX=9606 GN=MCF2;sp|P10911-5|MCF2_HUMAN Isoform of P10911, Isoform 5 of Proto-oncogene DBL OS=Homo sapiens OX=9606 GN=MCF2;tr|A0A2U3TZL4|A0A2U3TZL4_HUMAN Isoform of P1	17269	NaN
311	E9PNW4;A0A2U3TZL5;E9PR17;P13987;H0YET2	E9PNW4;A0A2U3TZL5;E9PR17;P13987	CD59 glycoprotein	CD59	19307000	24344000	17645000	6887800	5564500	2704100	NaN	NaN	NaN	5	3	3	3	29.6	29.6	29.6	11.985	0	11.713	75782000	15156000	5	7	2	3	2	34439000	27823000	13520000	18.5	29.6	18.5	2	3	2	2	3	2	2	3	2	AGLQVYNK;FEHCNFNDVTTR;LRENELTYYCCK	tr|E9PNW4|E9PNW4_HUMAN Isoform of E9PR17, CD59 glycoprotein OS=Homo sapiens OX=9606 PE=1 SV=1;tr|A0A2U3TZL5|A0A2U3TZL5_HUMAN Isoform of P13987, CD59 glycoprotein (Fragment) OS=Homo sapiens OX=9606 GN=CD59 PE=4 SV=1;tr|E9PR17|E9PR17_HUMAN CD59 glycoprotein	592;4556;10755	NaN;NaN;NaN
312	A0A2U3TZL8;H7BYN4;Q02241-2;Q02241;Q02241-3;H0YMJ4;A0A2R8Y531;H0YME6	A0A2U3TZL8;H7BYN4;Q02241-2;Q02241;Q02241-3	Kinesin-like protein;Kinesin-like protein KIF23	KIF23	25128000	18350000	22572000	515140	224640	326610	NaN	NaN	NaN	8	3	3	3	5.4	5.4	5.4	92.682	0	9.6223	70073000	1066400	43	10	4	3	3	37927000	13492000	18655000	3.8	3.8	5.4	2	2	3	2	2	3	2	2	3	ALLQEFDNAVLSK;EAGNINQSLMTLR;ELFDVVANPLVNDLIHGK	tr|A0A2U3TZL8|A0A2U3TZL8_HUMAN Isoform of Q02241, Kinesin-like protein OS=Homo sapiens OX=9606 GN=KIF23 PE=1 SV=1;tr|H7BYN4|H7BYN4_HUMAN Isoform of Q02241, Kinesin-like protein OS=Homo sapiens OX=9606 GN=KIF23 PE=1 SV=1;sp|Q02241-2|KIF23_HUMAN Isoform of Q	974;3153;3763	NaN;NaN;NaN
313	A0AVT1;A0AVT1-2;H0Y8S8;A0AVT1-4;A0AVT1-3;H0Y9U5	A0AVT1;A0AVT1-2	Ubiquitin-like modifier-activating enzyme 6	UBA6	25296000	37411000	33516000	1359900	563600	582570	NaN	NaN	NaN	6	8	8	8	8.7	8.7	8.7	117.97	0	16.558	205350000	2506000	56	15	5	6	4	105060000	52285000	48004000	6.8	7	6.8	6	6	6	6	6	6	6	6	6	ALQLLHCFPLDIR;FDLNEPLHLSFLQNAAK;FEKYFNHK;LETGQFLTFR;MYSIEPADR;NFALLGVGTSK;QDVIITALDNVEAR;TVFFESLER	sp|A0AVT1|UBA6_HUMAN Ubiquitin-like modifier-activating enzyme 6 OS=Homo sapiens OX=9606 GN=UBA6 PE=1 SV=1;sp|A0AVT1-2|UBA6_HUMAN Isoform of A0AVT1, Isoform 2 of Ubiquitin-like modifier-activating enzyme 6 OS=Homo sapiens OX=9606 GN=UBA6	1021;4507;4561;9456;11838;12011;12897;16122	NaN;NaN;NaN;NaN;NaN;NaN;NaN;NaN
314	A0MZ66-4;A0MZ66;A0MZ66-3;A0MZ66-2;A0MZ66-8;A0MZ66-5;A0MZ66-6;A0MZ66-7	A0MZ66-4;A0MZ66;A0MZ66-3;A0MZ66-2;A0MZ66-8;A0MZ66-5;A0MZ66-6	Shootin-1	KIAA1598	NaN	NaN	NaN	1583200	150260	192000	NaN	NaN	NaN	8	6	6	6	12	12	12	63.496	0	10.567	79097000	1925500	32	6	3	1	2	61541000	11412000	6144100	10.6	4.8	3.8	5	2	2	5	2	2	5	2	2	HSVDELQK;ILAIELENLK;LVEVIEEVNK;QLQLITSLK;QSHLLLQSSIPDQQLLK;SLDPENSETELER	sp|A0MZ66-4|SHOT1_HUMAN Isoform of A0MZ66, Isoform 4 of Shootin-1 OS=Homo sapiens OX=9606 GN=SHTN1;sp|A0MZ66|SHOT1_HUMAN Shootin-1 OS=Homo sapiens OX=9606 GN=SHTN1 PE=1 SV=4;sp|A0MZ66-3|SHOT1_HUMAN Isoform of A0MZ66, Isoform 3 of Shootin-1 OS=Homo sapiens	6914;7684;11112;13161;13269;14396	NaN;NaN;NaN;NaN;NaN;NaN
315	A1A4S6;H0Y8W5	A1A4S6;H0Y8W5	Rho GTPase-activating protein 10	ARHGAP10	NaN	NaN	NaN	87757	27563	NaN	NaN	NaN	NaN	2	2	2	2	3.6	3.6	3.6	89.374	0.00043011	3.1733	17362000	87757	49	1	1	0	0	16012000	1350600	0	3.6	1.1	0	2	1	0	2	1	0	2	1	0	DFNHYKMELQINIQNTRNR;GLIPQNYVK	sp|A1A4S6|RHG10_HUMAN Rho GTPase-activating protein 10 OS=Homo sapiens OX=9606 GN=ARHGAP10 PE=1 SV=1;tr|H0Y8W5|H0Y8W5_HUMAN Isoform of A1A4S6, Rho GTPase-activating protein 10 (Fragment) OS=Homo sapiens OX=9606 GN=ARHGAP10 PE=1 SV=1	2202;5971	NaN;NaN
316	M0R026;A1L0T0;M0R1B5;E9PJS0;E9PL44	M0R026;A1L0T0;M0R1B5;E9PJS0	Acetolactate synthase-like protein	ILVBL	19461000	16793000	14662000	298080	532890	371650	NaN	NaN	NaN	5	3	3	3	9.5	9.5	9.5	56.732	0	12.148	49260000	298080	21	10	6	2	2	30264000	11191000	7804700	9.5	7.6	7.6	3	2	2	3	2	2	3	2	2	GALQAVDQLSLFRPLCK;NAQMAQSPILLLGGAASTLLQNR;VLHDAQQQCR	tr|M0R026|M0R026_HUMAN Isoform of A1L0T0, Acetolactate synthase-like protein OS=Homo sapiens OX=9606 GN=ILVBL PE=1 SV=1;sp|A1L0T0|ILVBL_HUMAN Acetolactate synthase-like protein OS=Homo sapiens OX=9606 GN=ILVBL PE=1 SV=2;tr|M0R1B5|M0R1B5_HUMAN Isoform of A1	5345;11887;17132	NaN;NaN;NaN
317	A2A274;Q99798	A2A274;Q99798	Aconitate hydratase, mitochondrial	ACO2	31696000	32694000	28645000	4362200	1702400	1548000	NaN	NaN	NaN	2	18	18	18	33.2	33.2	33.2	87.819	0	77.252	434010000	7612500	39	46	17	14	15	245610000	99299000	89099000	30.4	24.1	24.8	17	13	13	17	13	13	17	13	13	DINQEVYNFLATAGAK;DLEDLQILIK;DLGGIVLANACGPCIGQWDR;EHAALEPR;FNPETDYLTGTDGK;IVYGHLDDPASQEIER;LNRPLTLSEK;LQLLEPFDK;LQLLEPFDKWDGK;LTGSLSGWSSPKDVILKVAGILTVK;LTIQGLK;NAVTQEFGPVPDTAR;NDANPETHAFVTSPEIVTALAIAGTLK;QGLLPLTFADPADYNK;SQFTITPGSEQIR;TGREDIANLADEFK;VAMQDATAQMAMLQFISSGLSK;VAVPSTIHCDHLIEAQVGGEK	tr|A2A274|A2A274_HUMAN Isoform of Q99798, Aconitate hydratase, mitochondrial OS=Homo sapiens OX=9606 GN=ACO2 PE=1 SV=1;sp|Q99798|ACON_HUMAN Aconitate hydratase, mitochondrial OS=Homo sapiens OX=9606 GN=ACO2 PE=1 SV=2	2422;2520;2551;3574;4959;8415;10449;10670;10671;10970;10979;11903;11926;12991;14716;15453;16351;16402	NaN;NaN;NaN;NaN;NaN;NaN;NaN;NaN;NaN;NaN;NaN;NaN;NaN;NaN;NaN;NaN;NaN;NaN
318	F8WER8;A2A2M1;F8WB23;Q8WV90;F2Z2E7;Q9Y697-2;Q9Y697-3;Q9Y697	F8WER8;A2A2M1;F8WB23;Q8WV90;F2Z2E7;Q9Y697-2;Q9Y697-3;Q9Y697	Cysteine desulfurase, mitochondrial	NFS1	NaN	NaN	NaN	1480000	NaN	NaN	NaN	NaN	NaN	8	1	1	1	21.8	21.8	21.8	9.6417	0.00044033	3.371	8880100	1480000	6	1	1	0	0	8880100	0	0	21.8	0	0	1	0	0	1	0	0	1	0	0	VLDAMLPYLINYYGNPHSR	tr|F8WER8|F8WER8_HUMAN Isoform of Q9Y697, Cysteine desulfurase, mitochondrial OS=Homo sapiens OX=9606 GN=NFS1 PE=1 SV=1;tr|A2A2M1|A2A2M1_HUMAN Isoform of Q9Y697, Cysteine desulfurase, mitochondrial (Fragment) OS=Homo sapiens OX=9606 GN=NFS1 PE=1 SV=8;tr|F8	17055	NaN
319	A2A2Q9;Q9Y312	A2A2Q9;Q9Y312	Protein AAR2 homolog	AAR2	NaN	NaN	NaN	109270	96035	93666	NaN	NaN	NaN	2	2	2	2	7.5	7.5	7.5	45.034	0.00044984	3.5201	5979400	109270	20	3	1	1	1	2185400	1920700	1873300	3.8	3.8	3.8	1	1	1	1	1	1	1	1	1	HSMDLSYALETVLNK;WISLTNFISEATVEK	tr|A2A2Q9|A2A2Q9_HUMAN Isoform of Q9Y312, Protein AAR2 homolog OS=Homo sapiens OX=9606 GN=AAR2 PE=1 SV=1;sp|Q9Y312|AAR2_HUMAN Protein AAR2 homolog OS=Homo sapiens OX=9606 GN=AAR2 PE=1 SV=2	6898;18023	NaN;NaN
320	A2IDA3;P29372-5;P29372-4;P29372-2;P29372	A2IDA3;P29372-5;P29372-4;P29372-2;P29372	DNA-3-methyladenine glycosylase	MPG	NaN	NaN	NaN	273800	147740	85032	NaN	NaN	NaN	5	1	1	1	6	6	6	27.295	0.00047824	4.1051	6585300	506560	13	2	0	1	1	3559400	1920600	1105400	6	6	6	1	1	1	1	1	1	1	1	1	LGLEFFDQPAVPLAR	tr|A2IDA3|A2IDA3_HUMAN Isoform of P29372, DNA-3-methyladenine glycosylase (Fragment) OS=Homo sapiens OX=9606 GN=MPG PE=1 SV=1;sp|P29372-5|3MG_HUMAN Isoform of P29372, Isoform 4 of DNA-3-methyladenine glycosylase OS=Homo sapiens OX=9606 GN=MPG;sp|P29372-4|3	9688	NaN
321	H0Y5G7;A2RRP1-2;A2RRP1	H0Y5G7;A2RRP1-2;A2RRP1	Neuroblastoma-amplified sequence	NBAS	NaN	NaN	NaN	NaN	44412	NaN	NaN	NaN	NaN	3	1	1	1	0.6	0.6	0.6	160.41	0.0067979	1.8477	2886800	44412	65	0	0	0	0	0	2886800	0	0	0.6	0	0	1	0	0	1	0	0	1	0	LLGLAELLR	tr|H0Y5G7|H0Y5G7_HUMAN Isoform of A2RRP1, Neuroblastoma-amplified sequence (Fragment) OS=Homo sapiens OX=9606 GN=NBAS PE=1 SV=1;sp|A2RRP1-2|NBAS_HUMAN Isoform of A2RRP1, Isoform 2 of Neuroblastoma-amplified sequence OS=Homo sapiens OX=9606 GN=NBAS;sp|A2RRP	10125	NaN
322	A3KN83-3;A3KN83-2;A3KN83	A3KN83-3;A3KN83-2;A3KN83	Protein strawberry notch homolog 1	SBNO1	NaN	NaN	NaN	76056	NaN	32952	NaN	NaN	NaN	3	1	1	1	1.1	1.1	1.1	154.06	0.0078403	1.8033	6758500	109010	62	2	1	0	1	4715500	0	2043000	1.1	0	1.1	1	0	1	1	0	1	1	0	1	SELDVPVEILNITEK	sp|A3KN83-3|SBNO1_HUMAN Isoform of A3KN83, Isoform 3 of Protein strawberry notch homolog 1 OS=Homo sapiens OX=9606 GN=SBNO1;sp|A3KN83-2|SBNO1_HUMAN Isoform of A3KN83, Isoform 2 of Protein strawberry notch homolog 1 OS=Homo sapiens OX=9606 GN=SBNO1;sp|A3KN8	14015	NaN
323	C9JMJ0;A4D0S4-2;A4D0S4-3;A4D0S4	C9JMJ0;A4D0S4-2;A4D0S4-3;A4D0S4	Laminin subunit beta-4	LAMB4	NaN	NaN	NaN	NaN	94132	NaN	NaN	NaN	NaN	4	1	1	1	2.2	2.2	2.2	85.103	1	-2	2824000	94132	30	1	0	1	0	0	2824000	0	0	2.2	0	0	1	0	0	1	0	0	1	0	NTQLMASSTCGLSRAQK	tr|C9JMJ0|C9JMJ0_HUMAN Isoform of A4D0S4, Laminin subunit beta-4 OS=Homo sapiens OX=9606 GN=LAMB4 PE=1 SV=2;sp|A4D0S4-2|LAMB4_HUMAN Isoform of A4D0S4, Isoform 2 of Laminin subunit beta-4 OS=Homo sapiens OX=9606 GN=LAMB4;sp|A4D0S4-3|LAMB4_HUMAN Isoform of A	12546	NaN
324	A5YKK6-2;A5YKK6;A5YKK6-3;A5YKK6-4;H3BMZ2	A5YKK6-2;A5YKK6;A5YKK6-3	CCR4-NOT transcription complex subunit 1	CNOT1	15869000	14894000	14488000	204450	100410	191360	NaN	NaN	NaN	5	8	8	8	4.6	4.6	4.6	266.38	0	19.594	77008000	496220	121	12	5	3	4	39355000	13102000	24551000	3	1.6	3.2	5	3	6	5	3	6	5	3	6	GLGMEVFPVDLIYRPWK;GNAPEGLPQLMEVVR;NLALDINELKPGNLLK;NLILSAFPR;SLDLIESLLR;SPVTFLSDLR;SVAHVTEADLFHTIETLMR;VDMLSEINIAPR	sp|A5YKK6-2|CNOT1_HUMAN Isoform of A5YKK6, Isoform 2 of CCR4-NOT transcription complex subunit 1 OS=Homo sapiens OX=9606 GN=CNOT1;sp|A5YKK6|CNOT1_HUMAN CCR4-NOT transcription complex subunit 1 OS=Homo sapiens OX=9606 GN=CNOT1 PE=1 SV=2;sp|A5YKK6-3|CNOT1_HU	5956;6088;12207;12263;14391;14692;14921;16512	NaN;NaN;NaN;NaN;NaN;NaN;NaN;NaN
325	H3BTL1;Q9GZQ8;A6NCE7;Q9H492;Q9H492-2	H3BTL1;Q9GZQ8;A6NCE7;Q9H492;Q9H492-2	Microtubule-associated proteins 1A/1B light chain 3B;Microtubule-associated proteins 1A/1B light chain 3 beta 2;Microtubule-associated proteins 1A/1B light chain 3A	MAP1LC3B;MAP1LC3B2;MAP1LC3A	29981000	33610000	26281000	8659400	3593800	2606800	NaN	NaN	NaN	5	2	2	2	28	28	28	9.0115	0	5.165	95434000	14860000	4	6	2	2	2	51588000	25343000	18503000	28	28	28	2	2	2	2	2	2	2	2	2	FLVPDHVNMSELIK;IPVIIER	tr|H3BTL1|H3BTL1_HUMAN Isoform of Q9GZQ8, Microtubule-associated protein 1 light chain 3 beta, isoform CRA_f OS=Homo sapiens OX=9606 GN=MAP1LC3B PE=3 SV=1;sp|Q9GZQ8|MLP3B_HUMAN Microtubule-associated proteins 1A/1B light chain 3B OS=Homo sapiens OX=9606 GN	4915;8014	NaN;NaN
326	A6NDF3;Q9BVG4	A6NDF3;Q9BVG4	Protein PBDC1	PBDC1	NaN	NaN	NaN	2039800	1014100	933280	NaN	NaN	NaN	2	1	1	1	4.3	4.3	4.3	26.644	0.0022918	2.3352	31898000	3987200	8	3	1	1	1	16319000	8113100	7466200	4.3	4.3	4.3	1	1	1	1	1	1	1	1	1	IDVLDPEELK	tr|A6NDF3|A6NDF3_HUMAN Isoform of Q9BVG4, Protein PBDC1 OS=Homo sapiens OX=9606 GN=PBDC1 PE=1 SV=2;sp|Q9BVG4|PBDC1_HUMAN Protein PBDC1 OS=Homo sapiens OX=9606 GN=PBDC1 PE=1 SV=1	7209	NaN
327	A6NDG6;H3BV17	A6NDG6;H3BV17	Phosphoglycolate phosphatase	PGP	NaN	NaN	NaN	NaN	574940	285200	NaN	NaN	NaN	2	2	2	2	9.7	9.7	9.7	34.006	0	11.073	15483000	860140	18	3	0	2	1	0	10349000	5133600	0	9.7	4.7	0	2	1	0	2	1	0	2	1	FIFDCVSQEYGINPER;TILTLTGVSTLGDVK	sp|A6NDG6|PGP_HUMAN Glycerol-3-phosphate phosphatase OS=Homo sapiens OX=9606 GN=PGP PE=1 SV=1;tr|H3BV17|H3BV17_HUMAN Isoform of A6NDG6, Glycerol-3-phosphate phosphatase (Fragment) OS=Homo sapiens OX=9606 GN=PGP PE=1 SV=1	4755;15571	NaN;NaN
328	F5GYN0;A6NE01	F5GYN0;A6NE01	Protein FAM186A	FAM186A	NaN	NaN	NaN	150140	NaN	NaN	NaN	NaN	NaN	2	1	1	1	0.4	0.4	0.4	262.29	1	-2	13813000	150140	92	0	0	0	0	13813000	0	0	0.4	0	0	1	0	0	1	0	0	1	0	0	ENGQMRQIQK	tr|F5GYN0|F5GYN0_HUMAN Isoform of A6NE01, Protein FAM186A OS=Homo sapiens OX=9606 GN=FAM186A PE=1 SV=1;sp|A6NE01|F186A_HUMAN Protein FAM186A OS=Homo sapiens OX=9606 GN=FAM186A PE=2 SV=3	3961	NaN
329	A6NEM2;P51610-2;P51610;P51610-4;H7C1C4;P51610-3	A6NEM2;P51610-2;P51610;P51610-4	Host cell factor 1;HCF N-terminal chain 1;HCF N-terminal chain 2;HCF N-terminal chain 3;HCF N-terminal chain 4;HCF N-terminal chain 5;HCF N-terminal chain 6;HCF C-terminal chain 1;HCF C-terminal chain 2;HCF C-terminal chain 3;HCF C-terminal chain 4;HCF C-terminal chain 5;HCF C-terminal chain 6	HCFC1	19784000	21131000	20854000	602470	209080	148340	NaN	NaN	NaN	6	6	6	6	3.9	3.9	3.9	213.47	0	19.918	73911000	959890	77	14	5	5	4	46390000	16099000	11422000	3.3	3.4	2.1	5	5	3	5	5	3	5	5	3	ASAVSPANLPAVLLQPR;GPFSEISAFK;SPAFVQLAPLSSK;SPISVPGGSALISNLGK;TCLPGFPGAPCAIK;VVGWSGPVPR	tr|A6NEM2|A6NEM2_HUMAN Isoform of P51610, Host cell factor 1 OS=Homo sapiens OX=9606 GN=HCFC1 PE=1 SV=2;sp|P51610-2|HCFC1_HUMAN Isoform of P51610, Isoform 2 of Host cell factor 1 OS=Homo sapiens OX=9606 GN=HCFC1;sp|P51610|HCFC1_HUMAN Host cell factor 1 OS=	1365;6154;14638;14667;15183;17826	NaN;NaN;NaN;NaN;NaN;NaN
330	B1AK81;A6NEM5;Q92643-2;Q92643	B1AK81;A6NEM5;Q92643-2;Q92643	GPI-anchor transamidase	PIGK	NaN	NaN	NaN	782810	256020	NaN	NaN	NaN	NaN	4	1	1	1	4	4	4	34.313	0.0022822	2.3106	14544000	1038800	14	1	1	0	0	10959000	3584200	0	4	4	0	1	1	0	1	1	0	1	1	0	NVLITDFFGSVR	tr|B1AK81|B1AK81_HUMAN Isoform of Q92643, GPI-anchor transamidase OS=Homo sapiens OX=9606 GN=PIGK PE=1 SV=1;tr|A6NEM5|A6NEM5_HUMAN Isoform of Q92643, GPI-anchor transamidase OS=Homo sapiens OX=9606 GN=PIGK PE=1 SV=1;sp|Q92643-2|GPI8_HUMAN Isoform of Q92643	12604	NaN
331	A6NFX8;Q9UKK9;A6NJU6;A6NCQ0;H0YEY4;C9JYY9	A6NFX8;Q9UKK9;A6NJU6;A6NCQ0	ADP-sugar pyrophosphatase	NUDT5	64253000	78164000	76927000	21530000	11531000	10099000	NaN	NaN	NaN	6	11	11	11	50.4	50.4	50.4	25.895	0	80.051	748500000	43161000	12	32	13	9	10	381650000	199100000	167760000	48.3	32.8	30.6	10	9	8	10	9	8	10	9	8	ELEEETGYK;EQTADGVAVIPVLQR;HANAKPFEVPFLK;KEQTADGVAVIPVLQR;PFEVPFLK;PGDGEFVEVISLPK;PKPGDGEFVEVISLPK;QFRPPMGGYCIEFPAGLIDDGETPEAAALR;QYIISEELISEGK;TLHYECIVLVK;TTYMDPTGK	tr|A6NFX8|A6NFX8_HUMAN Isoform of Q9UKK9, ADP-sugar pyrophosphatase OS=Homo sapiens OX=9606 GN=NUDT5 PE=1 SV=1;sp|Q9UKK9|NUDT5_HUMAN ADP-sugar pyrophosphatase OS=Homo sapiens OX=9606 GN=NUDT5 PE=1 SV=1;tr|A6NJU6|A6NJU6_HUMAN Isoform of Q9UKK9, ADP-sugar py	3748;4080;6569;8613;12719;12731;12751;12969;13388;15692;16087	NaN;NaN;NaN;NaN;NaN;NaN;NaN;NaN;NaN;NaN;NaN
332	A6NFY7	A6NFY7	Succinate dehydrogenase assembly factor 1, mitochondrial	SDHAF1	NaN	NaN	NaN	NaN	1922700	NaN	1	1	1	1	1	1	1	6.1	6.1	6.1	12.806	1	-2	9613300	1922700	5	1	0	1	0	0	9613300	0	0	6.1	0	0	1	0	0	1	0	0	1	0	RQLQLLR	sp|A6NFY7|SDHF1_HUMAN Succinate dehydrogenase assembly factor 1, mitochondrial OS=Homo sapiens OX=9606 GN=SDHAF1 PE=1 SV=1	13712	NaN
333	A6NHQ2	A6NHQ2	rRNA/tRNA 2-O-methyltransferase fibrillarin-like protein 1	FBLL1	NaN	NaN	NaN	3590900	NaN	NaN	2	1	1	1	2	1	1	6.6	3.3	3.3	34.803	0.0022736	2.2961	68226000	3590900	19	1	1	0	0	68226000	0	0	6.6	3.3	3.3	2	1	1	1	0	0	1	0	0	IVALNAHTFLR;TNIIPVLEDAR	sp|A6NHQ2|FBLL1_HUMAN rRNA/tRNA 2-O-methyltransferase fibrillarin-like protein 1 OS=Homo sapiens OX=9606 GN=FBLL1 PE=3 SV=2	8324;15822	NaN;NaN
334	A6NHR9-2;A6NHR9;J3KTL8;A6NHR9-3;A0A2R8YCU7	A6NHR9-2;A6NHR9;J3KTL8;A6NHR9-3	Structural maintenance of chromosomes flexible hinge domain-containing protein 1	SMCHD1	15779000	11323000	12710000	300140	104320	47547	NaN	NaN	NaN	5	8	8	8	5.3	5.3	5.3	215.74	0	15.706	77698000	452010	105	12	6	3	3	45606000	15906000	16186000	3.9	3.7	2.5	6	6	4	6	6	4	6	6	4	ANLGVFSVFAPR;EHLLQGLLPDVQVPTSVK;FSFGLLDLPFR;IDFLPHYDTLVK;LLLIDWPELK;LYFKPIGDPVFAR;SLFEASQQLLNEMK;TLPLFYGSIVR	sp|A6NHR9-2|SMHD1_HUMAN Isoform of A6NHR9, Isoform 2 of Structural maintenance of chromosomes flexible hinge domain-containing protein 1 OS=Homo sapiens OX=9606 GN=SMCHD1;sp|A6NHR9|SMHD1_HUMAN Structural maintenance of chromosomes flexible hinge domain-con	1150;3586;5079;7149;10187;11312;14419;15727	NaN;NaN;NaN;NaN;NaN;NaN;NaN;NaN
335	A6NHV6;B4DZM6;Q99640-4;Q99640-2;Q99640-3;Q99640	A6NHV6;B4DZM6;Q99640-4;Q99640-2;Q99640-3;Q99640	Membrane-associated tyrosine- and threonine-specific cdc2-inhibitory kinase	PKMYT1	NaN	NaN	NaN	NaN	NaN	69784	NaN	NaN	NaN	6	1	1	1	2.9	2.9	2.9	48.891	0.00043706	3.293	1256100	69784	18	1	0	0	1	0	0	1256100	0	0	2.9	0	0	1	0	0	1	0	0	1	ATAEALLALPVLR	tr|A6NHV6|A6NHV6_HUMAN Isoform of Q99640, Membrane-associated tyrosine- and threonine-specific cdc2-inhibitory kinase OS=Homo sapiens OX=9606 GN=PKMYT1 PE=1 SV=3;tr|B4DZM6|B4DZM6_HUMAN Isoform of Q99640, Membrane-associated tyrosine- and threonine-specific	1449	NaN
336	K7EJU3;K7EN86;C9JSK0;Q13432-2;Q13432;A6NIH7	K7EJU3;K7EN86;C9JSK0;Q13432-2;Q13432;A6NIH7	Protein unc-119 homolog A;Protein unc-119 homolog B	UNC119;UNC119B	NaN	NaN	NaN	1705700	1085200	NaN	NaN	NaN	NaN	6	1	1	1	7.2	7.2	7.2	14.231	0.00044228	3.3907	19536000	2790900	7	2	1	1	0	11940000	7596400	0	7.2	7.2	0	1	1	0	1	1	0	1	1	0	YQFTPAFLR	tr|K7EJU3|K7EJU3_HUMAN Isoform of Q13432, Protein unc-119 homolog A OS=Homo sapiens OX=9606 GN=UNC119 PE=1 SV=1;tr|K7EN86|K7EN86_HUMAN Isoform of Q13432, Protein unc-119 homolog A OS=Homo sapiens OX=9606 GN=UNC119 PE=1 SV=1;tr|C9JSK0|C9JSK0_HUMAN Isoform o	18546	NaN
337	I3L2R3;I3L2T8;I3L533;I3L2R9;I3L522;J3QSD2;J3QRZ1;A6NIZ0;Q9GZM8-3;Q9NXR1;Q9GZM8;Q9NXR1-1;Q9GZM8-2	I3L2R3;I3L2T8;I3L533;I3L2R9;I3L522;J3QSD2;J3QRZ1;A6NIZ0;Q9GZM8-3;Q9NXR1;Q9GZM8;Q9NXR1-1;Q9GZM8-2	Nuclear distribution protein nudE-like 1;Nuclear distribution protein nudE homolog 1	NDE1;NDEL1	NaN	NaN	NaN	NaN	171850	221230	NaN	NaN	NaN	13	1	1	1	8.8	8.8	8.8	14.077	0.00044543	3.4465	2358500	393080	6	2	0	1	1	0	1031100	1327400	0	8.8	8.8	0	1	1	0	1	1	0	1	1	ISALNIVGDLLR	tr|I3L2R3|I3L2R3_HUMAN Isoform of Q9NXR1, Nuclear distribution protein nudE homolog 1 (Fragment) OS=Homo sapiens OX=9606 GN=NDE1 PE=1 SV=1;tr|I3L2T8|I3L2T8_HUMAN Isoform of Q9NXR1, Nuclear distribution protein nudE homolog 1 (Fragment) OS=Homo sapiens OX=9	8113	NaN
338	H7C2P7;A6NJD9;A8MVT4;A8MYK1;Q16540	H7C2P7;A6NJD9;A8MVT4;A8MYK1;Q16540	39S ribosomal protein L23, mitochondrial	MRPL23	NaN	NaN	NaN	NaN	NaN	NaN	NaN	NaN	NaN	5	1	1	1	7.6	7.6	7.6	13.669	1	-2	0	0	8	1	0	1	0	0	0	0	0	7.6	0	0	1	0	0	1	0	0	1	0	VQHGSNKRR	tr|H7C2P7|H7C2P7_HUMAN Isoform of Q16540, 39S ribosomal protein L23, mitochondrial (Fragment) OS=Homo sapiens OX=9606 GN=MRPL23 PE=1 SV=1;tr|A6NJD9|A6NJD9_HUMAN Isoform of Q16540, 39S ribosomal protein L23, mitochondrial OS=Homo sapiens OX=9606 GN=MRPL23 P	17510	NaN
339	A6NLH6;Q9P003	A6NLH6;Q9P003	Protein cornichon homolog 4	CNIH4	NaN	NaN	NaN	NaN	NaN	3838200	NaN	NaN	NaN	2	1	1	1	14.6	14.6	14.6	15.771	0.00046232	3.7702	7676400	3838200	2	1	0	0	1	0	0	7676400	0	0	14.6	0	0	1	0	0	1	0	0	1	YIMVPSGNMGVFDPTEIHNR	tr|A6NLH6|A6NLH6_HUMAN Isoform of Q9P003, Protein cornichon homolog 4 OS=Homo sapiens OX=9606 GN=CNIH4 PE=1 SV=1;sp|Q9P003|CNIH4_HUMAN Protein cornichon homolog 4 OS=Homo sapiens OX=9606 GN=CNIH4 PE=1 SV=1	18372	NaN
340	Q5T5H1;O43768-4;O43768-3;O43768-9;A6NMQ3;O43768;O43768-2;O43768-5;O43768-7;A0A1W2PRU0;O43768-6;H3BMD8;H3BQ52;H3BTD3;P56211;O43768-8;P56211-2	Q5T5H1;O43768-4;O43768-3;O43768-9;A6NMQ3;O43768;O43768-2;O43768-5;O43768-7;A0A1W2PRU0;O43768-6	Alpha-endosulfine	ENSA	56345000	45975000	51590000	3058600	1018400	1255300	NaN	NaN	NaN	17	3	3	3	22.5	22.5	22.5	20.994	0	14.3	165100000	5332300	12	10	4	3	3	95174000	33770000	36156000	22.5	22.5	22.5	3	3	3	3	3	3	3	3	3	NLVTGDHIPTPQDLPQR;QEEENPAEETGEEK;YFDSGDYNMAK	tr|Q5T5H1|Q5T5H1_HUMAN Isoform of O43768, Alpha-endosulfine OS=Homo sapiens OX=9606 GN=ENSA PE=1 SV=1;sp|O43768-4|ENSA_HUMAN Isoform of O43768, Isoform 4 of Alpha-endosulfine OS=Homo sapiens OX=9606 GN=ENSA;sp|O43768-3|ENSA_HUMAN Isoform of O43768, Isoform	12333;12906;18248	NaN;NaN;NaN
341	A6NNK5;Q12888;Q12888-3;Q12888-2;H7C3N7	A6NNK5;Q12888;Q12888-3;Q12888-2;H7C3N7	Tumor suppressor p53-binding protein 1	TP53BP1	NaN	NaN	NaN	124330	70762	53583	NaN	NaN	NaN	5	2	2	2	1.8	1.8	1.8	209.02	0.00045372	3.6067	27491000	70762	88	5	2	2	1	10941000	11834000	4715300	1.8	1.8	1	2	2	1	2	2	1	2	2	1	EGDIIPPLTGATPPLIGHLK;LLFDDGYECDVLGK	tr|A6NNK5|A6NNK5_HUMAN Isoform of Q12888, TP53-binding protein 1 OS=Homo sapiens OX=9606 GN=TP53BP1 PE=1 SV=2;sp|Q12888|TP53B_HUMAN TP53-binding protein 1 OS=Homo sapiens OX=9606 GN=TP53BP1 PE=1 SV=2;sp|Q12888-3|TP53B_HUMAN Isoform of Q12888, Isoform 3 of	3484;10106	NaN;NaN
342	C9JH92;A6NP24;Q08257-3;Q08257;Q08257-2	C9JH92;A6NP24;Q08257-3;Q08257	Quinone oxidoreductase	CRYZ	41838000	31192000	26042000	4923300	2570700	568640	NaN	NaN	NaN	5	3	3	3	31.1	31.1	31.1	21.932	0	12.719	106570000	568640	11	7	2	2	3	54156000	28278000	24137000	24.3	31.1	31.1	2	3	3	2	3	3	2	3	3	AGESVLVHGASGGVGLAACQIAR;KPLLPYTPGSDVAGVIEAVGDNASAFK;VHACGVNPVETYIR	tr|C9JH92|C9JH92_HUMAN Isoform of Q08257, Quinone oxidoreductase (Fragment) OS=Homo sapiens OX=9606 GN=CRYZ PE=1 SV=1;tr|A6NP24|A6NP24_HUMAN Isoform of Q08257, Quinone oxidoreductase (Fragment) OS=Homo sapiens OX=9606 GN=CRYZ PE=1 SV=1;sp|Q08257-3|QOR_HUMA	556;8839;16864	NaN;NaN;NaN
343	B7ZBP5;A6PVN3;P43155-3;P43155-2;P43155	B7ZBP5;A6PVN3;P43155-3;P43155-2;P43155	Carnitine O-acetyltransferase	CRAT	NaN	NaN	NaN	2510300	3120500	1018000	NaN	NaN	NaN	5	2	2	2	30.6	30.6	30.6	11.293	0	5.9007	33244000	6648900	5	4	1	2	1	12552000	15603000	5090000	15.3	30.6	15.3	1	2	1	1	2	1	1	2	1	ALQPIVSEEEWAHTK;LPVPPLQQSLDHYLK	tr|B7ZBP5|B7ZBP5_HUMAN Isoform of P43155, Carnitine O-acetyltransferase (Fragment) OS=Homo sapiens OX=9606 GN=CRAT PE=1 SV=2;tr|A6PVN3|A6PVN3_HUMAN Isoform of P43155, Carnitine O-acetyltransferase OS=Homo sapiens OX=9606 GN=CRAT PE=1 SV=1;sp|P43155-3|CACP_	1022;10575	NaN;NaN
344	F6WIT2;A6PVN5;Q15257-3;Q15257-2;Q15257;B7ZBQ0;Q68CR8;A6PVN8;C9IZ76;A6PVN6;Q5T949;Q5T948;A6PVN9;Q15257-4	F6WIT2;A6PVN5;Q15257-3;Q15257-2;Q15257;B7ZBQ0;Q68CR8;A6PVN8;C9IZ76;A6PVN6;Q5T949;Q5T948;A6PVN9;Q15257-4	Serine/threonine-protein phosphatase 2A activator	PPP2R4;DKFZp781M17165	NaN	NaN	NaN	1314600	NaN	NaN	NaN	NaN	NaN	14	2	2	2	14.6	14.6	14.6	32.936	0.00043956	3.3424	24336000	1314600	14	3	3	0	0	24336000	0	0	14.6	0	0	2	0	0	2	0	0	2	0	0	FGSLLPIHPVTSG;LDEEAENLVATVVPTHLAAAVPEVAVYLK	tr|F6WIT2|F6WIT2_HUMAN Isoform of Q15257, Serine/threonine-protein phosphatase 2A activator OS=Homo sapiens OX=9606 GN=PTPA PE=1 SV=1;tr|A6PVN5|A6PVN5_HUMAN Isoform of Q15257, Serine/threonine-protein phosphatase 2A activator OS=Homo sapiens OX=9606 GN=PTP	4700;9203	NaN;NaN
345	P55145;A8K878;H7C2D6	P55145;A8K878	Mesencephalic astrocyte-derived neurotrophic factor	MANF	35526000	41659000	35870000	5315700	2520000	1863100	NaN	NaN	NaN	3	6	6	6	30.2	30.2	30.2	20.7	0	14.653	232160000	9698800	10	17	6	6	5	117340000	67160000	47663000	29.7	30.2	29.7	5	6	5	5	6	5	5	6	5	DRDVTFSPATIENELIK;DVTFSPATIENELIK;IINEVSKPLAHHIPVEK;ILDDWGETCK;QIDLSTVDLK;QIDLSTVDLKK	sp|P55145|MANF_HUMAN Mesencephalic astrocyte-derived neurotrophic factor OS=Homo sapiens OX=9606 GN=MANF PE=1 SV=3;tr|A8K878|A8K878_HUMAN Isoform of P55145, Mesencephalic astrocyte-derived neurotrophic factor OS=Homo sapiens OX=9606 GN=MANF PE=1 SV=1	2823;3017;7615;7704;13020;13021	NaN;NaN;NaN;NaN;NaN;NaN
346	Q5TIG5;A8MQ02;J3KN01;P55196-2;P55196-6;P55196-3;P55196-1;P55196;P55196-5;H0Y7R8	Q5TIG5;A8MQ02;J3KN01;P55196-2;P55196-6;P55196-3;P55196-1;P55196;P55196-5	Afadin	MLLT4	NaN	2660300	2379500	37331	14127	12411	NaN	NaN	NaN	10	3	3	3	2.6	2.6	2.6	189.15	0	7.7138	7470500	26539	85	6	2	2	2	3173100	2337900	1959500	1.4	2.2	2.2	2	2	2	2	2	2	2	2	2	GILVFQLK;IDDVLHTLTGAMSLLR;TILLSTTDPADFAVAEALEK	tr|Q5TIG5|Q5TIG5_HUMAN Isoform of P55196, Afadin OS=Homo sapiens OX=9606 GN=AFDN PE=1 SV=1;tr|A8MQ02|A8MQ02_HUMAN Isoform of P55196, Afadin OS=Homo sapiens OX=9606 GN=AFDN PE=1 SV=2;tr|J3KN01|J3KN01_HUMAN Isoform of P55196, Afadin OS=Homo sapiens OX=9606 G	5836;7137;15566	NaN;NaN;NaN
347	Q8NCN5;A8MT40;H3BQG3	Q8NCN5;A8MT40;H3BQG3	Pyruvate dehydrogenase phosphatase regulatory subunit, mitochondrial	PDPR	NaN	NaN	NaN	NaN	70742	16864	NaN	NaN	NaN	3	2	2	2	3.2	3.2	3.2	99.363	0.00045662	3.6761	4029900	87606	46	2	0	1	1	0	3254100	775740	0	3.2	2	0	2	1	0	2	1	0	2	1	INAGLNVIGIPSEIISPK;YTALNLIGPR	sp|Q8NCN5|PDPR_HUMAN Pyruvate dehydrogenase phosphatase regulatory subunit, mitochondrial OS=Homo sapiens OX=9606 GN=PDPR PE=1 SV=2;tr|A8MT40|A8MT40_HUMAN Isoform of Q8NCN5, Pyruvate dehydrogenase phosphatase regulatory subunit, mitochondrial OS=Homo sapie	7915;18609	NaN;NaN
348	A8MUA9;A8MU27;P55854;P55854-2	A8MUA9;A8MU27;P55854;P55854-2	Small ubiquitin-related modifier 3	SUMO3	206840000	210240000	174160000	33752000	16946000	12205000	NaN	NaN	NaN	4	3	3	1	20.7	20.7	6.7	15.317	0	8.367	440320000	62903000	7	7	3	2	2	236270000	118620000	85433000	20.7	20.7	20.7	3	3	3	3	3	3	1	1	1	RHTPLSK;TENDHINLK;VAGQDGSVVQFK	tr|A8MUA9|A8MUA9_HUMAN Isoform of P55854, SMT3 suppressor of mif two 3 homolog 3 (Yeast), isoform CRA_d OS=Homo sapiens OX=9606 GN=SUMO3 PE=1 SV=1;tr|A8MU27|A8MU27_HUMAN Isoform of P55854, Small ubiquitin-related modifier 3 OS=Homo sapiens OX=9606 GN=SUMO3	13551;15297;16318	NaN;NaN;NaN
349	H7BY10;K7EJV9;K7ERT8;A8MUS3;P62750;K7EMA7	H7BY10;K7EJV9;K7ERT8;A8MUS3;P62750;K7EMA7	60S ribosomal protein L23a	RPL23A	149850000	182920000	185870000	57375000	35455000	45113000	NaN	NaN	NaN	6	8	8	8	42.4	42.4	42.4	17.692	0	30.293	893030000	137940000	6	25	9	8	8	376630000	233680000	282720000	32.9	36.7	32.3	7	6	6	7	6	6	7	6	6	FPLTTESAMK;KIEDNNTLVFIVDVK;KLYDIDVAK;LAPDYDALDVANK;LDHYAIIK;LYDIDVAK;VNTLIRPDGEK;VNTLIRPDGEKK	tr|H7BY10|H7BY10_HUMAN Isoform of P62750, 60S ribosomal protein L23a (Fragment) OS=Homo sapiens OX=9606 GN=RPL23A PE=1 SV=1;tr|K7EJV9|K7EJV9_HUMAN Isoform of P62750, 60S ribosomal protein L23a (Fragment) OS=Homo sapiens OX=9606 GN=RPL23A PE=1 SV=1;tr|K7ERT	4994;8720;8798;9075;9233;11301;17391;17392	NaN;NaN;NaN;NaN;NaN;NaN;NaN;NaN
350	Q49AN9;F5H013;P62308;A8MWD9;C9JVQ0	Q49AN9;F5H013;P62308;A8MWD9	Small nuclear ribonucleoprotein G;Putative small nuclear ribonucleoprotein G-like protein 15	SNRPG;SNRPGP15	97946000	95787000	NaN	96536000	28696000	28806000	NaN	NaN	NaN	5	3	3	3	31.2	31.2	31.2	7.1013	0	7.1452	308070000	154040000	2	6	2	2	2	193070000	57392000	57611000	31.2	31.2	31.2	3	2	3	3	2	3	3	2	3	GNSIIMLEALER;GNSIIMLEALERV;HVQGILR	tr|Q49AN9|Q49AN9_HUMAN Isoform of P62308, SNRPG protein OS=Homo sapiens OX=9606 GN=SNRPG PE=1 SV=1;tr|F5H013|F5H013_HUMAN Isoform of P62308, Small nuclear ribonucleoprotein G OS=Homo sapiens OX=9606 GN=SNRPG PE=1 SV=1;sp|P62308|RUXG_HUMAN Small nuclear rib	6120;6121;6967	NaN;NaN;NaN
351	Q8NBJ7-3;C9JL30;C9J660;J3KQJ1;A8MXB9;Q8NBJ7;F8WA42;H7C3B2;F8WES7;F8WEV7;J3QT17;E9PG02;F8WEX5;Q8NBJ7-5;Q8NBJ7-2;Q8NBJ7-4;E9PBT8	Q8NBJ7-3;C9JL30;C9J660;J3KQJ1;A8MXB9;Q8NBJ7;F8WA42;H7C3B2;F8WES7;F8WEV7;J3QT17;E9PG02;F8WEX5;Q8NBJ7-5;Q8NBJ7-2;Q8NBJ7-4;E9PBT8	Sulfatase-modifying factor 2	SUMF2	NaN	NaN	NaN	NaN	540540	386120	NaN	NaN	NaN	17	2	2	2	8.6	8.6	8.6	37.395	0.001199	2.613	20508000	540540	15	2	0	1	1	0	14717000	5791800	0	8.6	5	0	2	1	0	2	1	0	2	1	EATVKPFAIDIFPVTNK;LPTEEEWEFAAR	sp|Q8NBJ7-3|SUMF2_HUMAN Isoform of Q8NBJ7, Isoform 3 of Inactive C-alpha-formylglycine-generating enzyme 2 OS=Homo sapiens OX=9606 GN=SUMF2;tr|C9JL30|C9JL30_HUMAN Isoform of Q8NBJ7, Inactive C-alpha-formylglycine-generating enzyme 2 (Fragment) OS=Homo sapi	3227;10564	NaN;NaN
352	A8MZH8;A8MXQ1;P53801	A8MZH8;A8MXQ1;P53801	Pituitary tumor-transforming gene 1 protein-interacting protein	PTTG1IP	NaN	NaN	NaN	1835200	1057600	727490	NaN	NaN	NaN	3	1	1	1	16.8	16.8	16.8	11.598	0.00044703	3.4677	28962000	3620300	8	5	2	1	2	14682000	8460800	5819900	16.8	16.8	16.8	1	1	1	1	1	1	1	1	1	ACLDYPVTSVLPPASLCK	tr|A8MZH8|A8MZH8_HUMAN Isoform of P53801, Pituitary tumor-transforming gene 1 protein-interacting protein OS=Homo sapiens OX=9606 GN=PTTG1IP PE=1 SV=1;tr|A8MXQ1|A8MXQ1_HUMAN Isoform of P53801, Pituitary tumor-transforming gene 1 protein-interacting protein	225	NaN
353	H0Y935;E9PAL5;A8TX70-2;A8TX70	H0Y935;E9PAL5;A8TX70-2;A8TX70	Collagen alpha-5(VI) chain	COL6A5	NaN	NaN	NaN	NaN	1113100	1214700	NaN	NaN	NaN	4	1	1	1	1.7	1.7	1.7	88.613	0.00082372	2.8229	88458000	2327800	38	2	0	1	1	0	42299000	46159000	0	1.7	1.7	0	1	1	0	1	1	0	1	1	DIITSIVNDLNIR	tr|H0Y935|H0Y935_HUMAN Isoform of A8TX70, Collagen alpha-5(VI) chain (Fragment) OS=Homo sapiens OX=9606 GN=COL6A5 PE=1 SV=1;tr|E9PAL5|E9PAL5_HUMAN Isoform of A8TX70, Collagen alpha-5(VI) chain OS=Homo sapiens OX=9606 GN=COL6A5 PE=1 SV=3;sp|A8TX70-2|CO6A5_H	2397	NaN
354	A9C4B8;Q96N66-3;Q96N66;H7C2M4;C9J4E9;A0A0G2JNX6;M0R1Z5;Q96N66-2	A9C4B8;Q96N66-3;Q96N66;H7C2M4;C9J4E9;A0A0G2JNX6;M0R1Z5;Q96N66-2	Lysophospholipid acyltransferase 7	MBOAT7	NaN	NaN	NaN	1808500	NaN	456130	NaN	NaN	NaN	8	2	2	2	14.8	14.8	14.8	28.599	0	5.047	20382000	2264600	9	3	2	0	1	16276000	0	4105200	14.8	0	6.2	2	0	1	2	0	1	2	0	1	LVSLASEVQDLHLAQR;TYLDWLEQPFPGAVPSLRPLLR	tr|A9C4B8|A9C4B8_HUMAN Isoform of Q96N66, Lysophospholipid acyltransferase 7 (Fragment) OS=Homo sapiens OX=9606 GN=MBOAT7 PE=1 SV=1;sp|Q96N66-3|MBOA7_HUMAN Isoform of Q96N66, Isoform 3 of Lysophospholipid acyltransferase 7 OS=Homo sapiens OX=9606 GN=MBOAT7	11229;16249	NaN;NaN
355	A9Z1X7;Q8IYB3-2;Q8IYB3	A9Z1X7;Q8IYB3-2;Q8IYB3	Serine/arginine repetitive matrix protein 1	SRRM1	8500600	5658300	5937900	111150	36510	37272	NaN	NaN	NaN	3	1	1	1	3.7	3.7	3.7	103.39	0	10.432	21686000	184930	42	6	2	2	2	13592000	4105300	3988900	3.7	3.7	3.7	1	1	1	1	1	1	1	1	1	AVAAAAAAAVTPAAIAAATTTLAQEEPVAAPEPK	tr|A9Z1X7|A9Z1X7_HUMAN Isoform of Q8IYB3, Serine/arginine repetitive matrix protein 1 OS=Homo sapiens OX=9606 GN=SRRM1 PE=1 SV=1;sp|Q8IYB3-2|SRRM1_HUMAN Isoform of Q8IYB3, Isoform 2 of Serine/arginine repetitive matrix protein 1 OS=Homo sapiens OX=9606 GN=	1529	NaN
356	F8WB30;F8WAW7;F8WE29;F8WBB0;H7BYN7;Q6UW50;B0QY01;O60784-3;O60784;O60784-2	F8WB30;F8WAW7;F8WE29;F8WBB0;H7BYN7;Q6UW50;B0QY01;O60784-3;O60784;O60784-2	Target of Myb protein 1	TOM1	NaN	NaN	NaN	861990	NaN	NaN	NaN	NaN	NaN	10	1	1	1	64	64	64	2.7752	0.00045065	3.5355	861990	861990	1	1	1	0	0	861990	0	0	64	0	0	1	0	0	1	0	0	1	0	0	MDFLLGNPFSSPVGQR	tr|F8WB30|F8WB30_HUMAN Isoform of O60784, Target of Myb protein 1 OS=Homo sapiens OX=9606 GN=TOM1 PE=1 SV=1;tr|F8WAW7|F8WAW7_HUMAN Isoform of O60784, Target of Myb protein 1 OS=Homo sapiens OX=9606 GN=TOM1 PE=1 SV=1;tr|F8WE29|F8WE29_HUMAN Isoform of O60784	11410	NaN
357	B0QY89;Q9Y262;Q9Y262-2;B0QY90;C9JHP4;C9K0Q7;H0Y7E6;H7C3A0	B0QY89;Q9Y262;Q9Y262-2;B0QY90	Eukaryotic translation initiation factor 3 subunit L	EIF3L	66280000	59138000	60983000	7534600	4496000	3381100	NaN	NaN	NaN	8	14	14	14	24.1	24.1	24.1	70.901	0	56.506	576030000	15412000	30	37	12	12	13	291850000	164550000	119630000	19.3	18.6	19.9	10	10	11	10	10	11	10	10	11	FLSPVVPNYDNVHPNYHK;GDPQVYEELFSYSCPK;IDESIHLQLR;IQLLVFK;IWNVHSVLNVLHSLVDK;IWNVHSVLNVLHSLVDKSNINR;KSEEEIDFLR;LAGFLDLTEQEFR;RYGDFFIR;VLENIELNKK;VSGGPSLEQR;VYEIQDIYENSWTK;VYELQASR;YGDFFIR	tr|B0QY89|B0QY89_HUMAN Isoform of Q9Y262, Eukaryotic translation initiation factor 3 subunit L OS=Homo sapiens OX=9606 GN=EIF3L PE=1 SV=1;sp|Q9Y262|EIF3L_HUMAN Eukaryotic translation initiation factor 3 subunit L OS=Homo sapiens OX=9606 GN=EIF3L PE=1 SV=1;	4900;5454;7144;8057;8427;8428;8897;9020;13781;17093;17591;17936;17937;18279	NaN;NaN;NaN;NaN;NaN;NaN;NaN;NaN;NaN;NaN;NaN;NaN;NaN;NaN
358	H3BPC4;H3BQQ9;B0QYN7;P63279	H3BPC4;H3BQQ9;B0QYN7;P63279	SUMO-conjugating enzyme UBC9	UBE2I	NaN	NaN	NaN	12755000	3060600	2585500	NaN	NaN	NaN	4	2	2	2	30	30	30	7.8891	0.00047326	3.9794	95718000	12755000	4	5	3	1	1	73134000	12242000	10342000	30	17.1	17.1	2	1	1	2	1	1	2	1	1	DDYPSSPPK;DHPFGFVAVPTK	tr|H3BPC4|H3BPC4_HUMAN Isoform of P63279, SUMO-conjugating enzyme UBC9 (Fragment) OS=Homo sapiens OX=9606 GN=UBE2I PE=1 SV=2;tr|H3BQQ9|H3BQQ9_HUMAN Isoform of P63279, SUMO-conjugating enzyme UBC9 (Fragment) OS=Homo sapiens OX=9606 GN=UBE2I PE=1 SV=1;tr|B0Q	2115;2344	NaN;NaN
359	Q99829;B0QZ18;F2Z2V0;A6PVH9;E7ENH5;Q5JX56;Q5JX58;Q5JX59;Q5JX60;Q5JX44;Q5JX55;Q5JX45;Q5JX52;Q5JX61;Q5JX54;E7EV27;Q5JX57;H0Y524;Q5JX53	Q99829;B0QZ18;F2Z2V0;A6PVH9;E7ENH5;Q5JX56;Q5JX58;Q5JX59;Q5JX60;Q5JX44;Q5JX55;Q5JX45	Copine-1	CPNE1	55230000	63504000	59148000	9128600	4779900	4573800	NaN	NaN	NaN	19	9	9	9	20.7	20.7	20.7	59.058	0	30.455	415060000	18482000	18	19	8	5	6	211180000	105390000	98486000	17.3	13	15.1	7	6	7	7	6	7	7	6	7	DIVQFVPYR;EALAQTVLAEVPTQLVSYFR;FGIYDIDNK;GTITVSAQELK;LYGPTNFAPIINHVAR;SDPFLEFFR;SDPLCVLLQDVGGGSWAELGR;TLQLEYR;VVTMEVEAR	sp|Q99829|CPNE1_HUMAN Copine-1 OS=Homo sapiens OX=9606 GN=CPNE1 PE=1 SV=1;tr|B0QZ18|B0QZ18_HUMAN Isoform of Q99829, Copine-1 OS=Homo sapiens OX=9606 GN=CPNE1 PE=1 SV=1;tr|F2Z2V0|F2Z2V0_HUMAN Isoform of Q99829, Copine-1 (Fragment) OS=Homo sapiens OX=9606 GN	2453;3174;4666;6358;11319;13936;13938;15738;17890	NaN;NaN;NaN;NaN;NaN;NaN;NaN;NaN;NaN
360	B0QZD4;Q5VV41-2;Q5VV41;B0QZD3	B0QZD4;Q5VV41-2;Q5VV41;B0QZD3	Rho guanine nucleotide exchange factor 16	ARHGEF16	NaN	NaN	NaN	NaN	251220	108690	NaN	NaN	NaN	4	2	2	2	16.1	16.1	16.1	20.47	0	4.3985	3958900	108690	11	2	0	1	1	0	2763400	1195600	0	10	6.1	0	1	1	0	1	1	0	1	1	AQVLVEDISDILEEHAEK;LPLLMDTLCLK	tr|B0QZD4|B0QZD4_HUMAN Isoform of Q5VV41, Rho guanine nucleotide exchange factor 16 (Fragment) OS=Homo sapiens OX=9606 GN=ARHGEF16 PE=1 SV=1;sp|Q5VV41-2|ARHGG_HUMAN Isoform of Q5VV41, Isoform 2 of Rho guanine nucleotide exchange factor 16 OS=Homo sapiens O	1328;10531	NaN;NaN
361	B0S8I6;Q9Y247;Q14320	B0S8I6;Q9Y247;Q14320	Protein FAM50B;Protein FAM50A	FAM50A;FAM50B	NaN	NaN	NaN	757490	NaN	NaN	NaN	NaN	NaN	3	1	1	1	5	5	5	30.693	0.0064958	1.8943	7574900	757490	10	1	1	0	0	7574900	0	0	5	0	0	1	0	0	1	0	0	1	0	0	FSAHYDAVEAELK	tr|B0S8I6|B0S8I6_HUMAN Isoform of Q14320, Protein FAM50A (Fragment) OS=Homo sapiens OX=9606 GN=FAM50A PE=1 SV=1;sp|Q9Y247|FA50B_HUMAN Protein FAM50B OS=Homo sapiens OX=9606 GN=FAM50B PE=1 SV=1;sp|Q14320|FA50A_HUMAN Protein FAM50A OS=Homo sapiens OX=9606 GN	5060	NaN
362	B1AH59;Q9H1I8-2;Q9H1I8-3;Q9H1I8	B1AH59;Q9H1I8-2;Q9H1I8-3;Q9H1I8	Activating signal cointegrator 1 complex subunit 2	ASCC2	NaN	NaN	NaN	247460	NaN	129310	NaN	NaN	NaN	4	1	1	1	3.3	3.3	3.3	27.52	0.0011811	2.516	4521200	376770	12	2	1	0	1	2969500	0	1551700	3.3	0	3.3	1	0	1	1	0	1	1	0	1	SVFLTFLR	tr|B1AH59|B1AH59_HUMAN Isoform of Q9H1I8, Activating signal cointegrator 1 complex subunit 2 (Fragment) OS=Homo sapiens OX=9606 GN=ASCC2 PE=1 SV=1;sp|Q9H1I8-2|ASCC2_HUMAN Isoform of Q9H1I8, Isoform 2 of Activating signal cointegrator 1 complex subunit 2 OS	14947	NaN
363	B1AH87;P30536	B1AH87;P30536	Translocator protein	TSPO	NaN	NaN	NaN	5419800	3196700	1304400	NaN	NaN	NaN	2	3	3	3	36.4	36.4	36.4	11.896	0	5.1603	63421000	9921000	6	5	2	2	1	36415000	19180000	7826700	29	15	7.5	2	2	1	2	2	1	2	2	1	APPWVPAMGFTLAPSLGCFVGSR;ELGGFTEK;FVHGEGLR	tr|B1AH87|B1AH87_HUMAN Isoform of P30536, Putative peripheral benzodiazepine receptor-related protein (Fragment) OS=Homo sapiens OX=9606 GN=TSPO PE=1 SV=1;sp|P30536|TSPO_HUMAN Translocator protein OS=Homo sapiens OX=9606 GN=TSPO PE=1 SV=3	1226;3775;5208	NaN;NaN;NaN
364	B1AHD1;P55769	B1AHD1;P55769	NHP2-like protein 1;NHP2-like protein 1, N-terminally processed	NHP2L1	56694000	59631000	63870000	15802000	8946500	9717500	NaN	NaN	NaN	2	4	4	4	35.6	35.6	35.6	14.627	0	22.577	275730000	34466000	8	10	3	3	4	126420000	71572000	77740000	27.3	23.5	35.6	3	3	4	3	3	4	3	3	4	ACGVSRPVIACSVTIK;AYPLADAHLTK;LLDLVQQSCNYK;NVPYVFVR	tr|B1AHD1|B1AHD1_HUMAN Isoform of P55769, NHP2-like protein 1 OS=Homo sapiens OX=9606 GN=SNU13 PE=1 SV=1;sp|P55769|NH2L1_HUMAN NHP2-like protein 1 OS=Homo sapiens OX=9606 GN=SNU13 PE=1 SV=3	223;1731;10033;12625	NaN;NaN;NaN;NaN
365	B1AKD8;Q5TZA2-2;Q5TZA2	B1AKD8;Q5TZA2-2;Q5TZA2	Rootletin	CROCC	NaN	NaN	NaN	1914200	803850	779880	NaN	NaN	NaN	3	1	1	1	0.6	0.6	0.6	149.06	0.0011957	2.5951	262350000	3498000	75	3	1	1	1	143570000	60288000	58491000	0.6	0.6	0.6	1	1	1	1	1	1	1	1	1	LALLEEAR	tr|B1AKD8|B1AKD8_HUMAN Isoform of Q5TZA2, Rootletin (Fragment) OS=Homo sapiens OX=9606 GN=CROCC PE=1 SV=2;sp|Q5TZA2-2|CROCC_HUMAN Isoform of Q5TZA2, Isoform 2 of Rootletin OS=Homo sapiens OX=9606 GN=CROCC;sp|Q5TZA2|CROCC_HUMAN Rootletin OS=Homo sapiens OX=	9053	NaN
366	G3V1R5;B1AKJ5;O43847;O43847-2;H0Y5G9;F5H7V1	G3V1R5;B1AKJ5;O43847;O43847-2;H0Y5G9;F5H7V1	Nardilysin	NRD1	13012000	17918000	17101000	346530	96461	151460	NaN	NaN	NaN	6	5	5	5	5.4	5.4	5.4	125.12	0	9.3806	69334000	594450	45	10	3	4	3	34615000	16581000	18137000	3.1	4.4	2.1	3	4	2	3	4	2	3	4	2	AFDCPETEYPVK;AFTTTLNLLPYHK;ANLVLLSGANEGK;FHLISPLIQK;IEEFLSSFEEK	tr|G3V1R5|G3V1R5_HUMAN Isoform of O43847, Nardilysin (N-arginine dibasic convertase), isoform CRA_e OS=Homo sapiens OX=9606 GN=NRDC PE=1 SV=1;tr|B1AKJ5|B1AKJ5_HUMAN Isoform of O43847, Nardilysin (N-arginine dibasic convertase), isoform CRA_d OS=Homo sapien	462;530;1154;4727;7239	NaN;NaN;NaN;NaN;NaN
367	B1AKV2;B1AKV6;B1AKV3;Q9NVA1-2;Q9NVA1;F8WCR2;B1AKV4;F6UTR7;Q9NVA1-5;Q9NVA1-4	B1AKV2;B1AKV6;B1AKV3;Q9NVA1-2;Q9NVA1;F8WCR2;B1AKV4;F6UTR7;Q9NVA1-5;Q9NVA1-4	Ubiquinol-cytochrome-c reductase complex assembly factor 1	UQCC1	NaN	NaN	NaN	NaN	315870	636580	NaN	NaN	NaN	10	2	2	2	9.5	9.5	9.5	25.49	0.00044385	3.4342	11429000	952450	12	0	0	0	0	0	3790500	7639000	0	5.4	9.5	0	1	2	0	1	2	0	1	2	IIEAMGFTGPLK;TDFEEFFLR	tr|B1AKV2|B1AKV2_HUMAN Isoform of Q9NVA1, Ubiquinol-cytochrome-c reductase complex assembly factor 1 OS=Homo sapiens OX=9606 GN=UQCC1 PE=1 SV=1;tr|B1AKV6|B1AKV6_HUMAN Isoform of Q9NVA1, Ubiquinol-cytochrome-c reductase complex assembly factor 1 (Fragment)	7565;15211	NaN;NaN
368	B1ALA9;P60891;A0A2R8Y7H4;P60891-2;B7ZB02;A0A0B4J207;P21108;B1ALA7;Q15244;A6NMS2;H7C540;D3YTJ7	B1ALA9;P60891;A0A2R8Y7H4;P60891-2;B7ZB02;A0A0B4J207;P21108	Ribose-phosphate pyrophosphokinase 1;Ribose-phosphate pyrophosphokinase 3	PRPS1;PRPS1L1	50768000	62687000	59409000	2607400	1483600	2556200	NaN	NaN	NaN	12	10	10	4	48.8	48.8	20.4	31.392	0	27.675	388530000	6647300	17	25	6	8	11	144300000	115270000	128960000	20.4	35.1	48.8	4	7	10	4	7	10	2	3	4	FSNQETCVEIGESVR;IFSGSSHQDLSQK;INNACFEAVVVTNTIPQEDK;LGLELGK;LNVDFALIHK;MVLVGDVK;THNGESVSYLFSHVPL;VAILVDDMADTCGTICHAADK;VTAVIPCFPYAR;VYAILTHGIFSGPAISR	tr|B1ALA9|B1ALA9_HUMAN Isoform of P60891, Ribose-phosphate pyrophosphokinase 1 OS=Homo sapiens OX=9606 GN=PRPS1 PE=1 SV=2;sp|P60891|PRPS1_HUMAN Ribose-phosphate pyrophosphokinase 1 OS=Homo sapiens OX=9606 GN=PRPS1 PE=1 SV=2;tr|A0A2R8Y7H4|A0A2R8Y7H4_HUMAN I	5112;7366;7939;9689;10463;11801;15495;16334;17666;17929	NaN;NaN;NaN;NaN;NaN;NaN;NaN;NaN;NaN;NaN
369	B1ALC0;O15511;O15511-2	B1ALC0;O15511;O15511-2	Actin-related protein 2/3 complex subunit 5	ARPC5	NaN	22821000	25876000	2076900	1139200	1272900	NaN	NaN	NaN	3	3	2	2	29.6	23.7	23.7	14.807	0	5.4697	60831000	4489000	9	4	0	2	2	18692000	20442000	21697000	9.6	29.6	29.6	1	3	3	1	2	2	1	2	2	GFESPSDNSSAMLLQWHEK;NGVDLLMK;QGNMTAALQAALK	tr|B1ALC0|B1ALC0_HUMAN Isoform of O15511, Actin-related protein 2/3 complex subunit 5 OS=Homo sapiens OX=9606 GN=ARPC5 PE=1 SV=1;sp|O15511|ARPC5_HUMAN Actin-related protein 2/3 complex subunit 5 OS=Homo sapiens OX=9606 GN=ARPC5 PE=1 SV=3;sp|O15511-2|ARPC5_	5586;12091;12993	NaN;NaN;NaN
370	B1AMB1;B1AMB2;Q9BPZ7-5;Q9BPZ7-6;Q9BPZ7-3;Q9BPZ7-2;Q9BPZ7	B1AMB1;B1AMB2;Q9BPZ7-5;Q9BPZ7-6;Q9BPZ7-3;Q9BPZ7-2;Q9BPZ7	Target of rapamycin complex 2 subunit MAPKAP1	MAPKAP1	NaN	NaN	NaN	1273600	335440	272360	NaN	NaN	NaN	7	1	1	1	15.1	15.1	15.1	10.36	0.0011914	2.5835	3762800	1881400	2	2	0	1	1	2547200	670870	544710	15.1	15.1	15.1	1	1	1	1	1	1	1	1	1	AFLDNPTIILAHIR	tr|B1AMB1|B1AMB1_HUMAN Isoform of Q9BPZ7, Target of rapamycin complex 2 subunit MAPKAP1 (Fragment) OS=Homo sapiens OX=9606 GN=MAPKAP1 PE=1 SV=1;tr|B1AMB2|B1AMB2_HUMAN Isoform of Q9BPZ7, Target of rapamycin complex 2 subunit MAPKAP1 (Fragment) OS=Homo sapie	500	NaN
371	R4GNH9;R4GMQ7;B1AMU7;B1AMU4;Q9Y3B2	R4GNH9;R4GMQ7;B1AMU7;B1AMU4;Q9Y3B2	Exosome complex component CSL4	EXOSC1	NaN	NaN	NaN	1261000	573530	NaN	NaN	NaN	NaN	5	1	1	1	12.2	12.2	12.2	15.105	0.00082271	2.82	14676000	1834500	8	2	1	1	0	10088000	4588300	0	12.2	12.2	0	1	1	0	1	1	0	1	1	0	ETESQLLPDVGAIVTCK	tr|R4GNH9|R4GNH9_HUMAN Isoform of Q9Y3B2, Exosome complex component CSL4 OS=Homo sapiens OX=9606 GN=EXOSC1 PE=1 SV=1;tr|R4GMQ7|R4GMQ7_HUMAN Isoform of Q9Y3B2, Exosome complex component CSL4 (Fragment) OS=Homo sapiens OX=9606 GN=EXOSC1 PE=1 SV=1;tr|B1AMU7|B	4182	NaN
372	B1ANR0;Q13310-2;Q13310;Q13310-3;H0Y5F5;H0YEU6;H0YEQ8;B1ANR1;H0YCC8;H0Y6X6	B1ANR0;Q13310-2;Q13310;Q13310-3;H0Y5F5	Polyadenylate-binding protein;Polyadenylate-binding protein 4	PABPC4	51652000	44174000	52758000	3285800	1708700	1699500	NaN	NaN	NaN	10	16	8	8	33.5	17.2	17.2	67.97	0	21.349	338290000	6694000	32	18	6	5	7	182970000	73529000	81790000	25.5	23.3	27.8	12	12	13	5	6	7	5	6	7	AHLTNQYMQR;ALDTMNFDVIK;ALYDTFSAFGNILSCK;EFSPFGSITSAK;EFTNVYIK;FSPAGPVLSIR;GFGFVCFSSPEEATK;GYAFVHFETQEAADK;ITGMLLEIDNSELLHMLESPESLR;IVGSKPLYVALAQR;LFPLIQTMHSNLAGK;MNGMLLNDR;NFGEEVDDESLKELFSQFGK;PLYVALAQR;SLGYAYVNFQQPADAER;YQGVNLYIK	tr|B1ANR0|B1ANR0_HUMAN Isoform of Q13310, Polyadenylate-binding protein OS=Homo sapiens OX=9606 GN=PABPC4 PE=1 SV=1;sp|Q13310-2|PABP4_HUMAN Isoform of Q13310, Isoform 2 of Polyadenylate-binding protein 4 OS=Homo sapiens OX=9606 GN=PABPC4;sp|Q13310|PABP4_HU	671;869;1096;3457;3466;5114;5601;6496;8254;8358;9548;11676;12028;12771;14443;18547	NaN;NaN;NaN;NaN;NaN;NaN;NaN;NaN;NaN;NaN;NaN;NaN;NaN;NaN;NaN;NaN
373	B1APM4;P35610;P35610-3;P35610-2	B1APM4;P35610;P35610-3;P35610-2	Sterol O-acyltransferase 1	SOAT1	14540000	17716000	NaN	2285100	1280400	527870	NaN	NaN	NaN	4	2	2	2	11.5	11.5	11.5	29.892	0	4.7064	45028000	4093500	11	5	2	2	1	25137000	14085000	5806600	11.5	11.5	6.2	2	2	1	2	2	1	2	2	1	EVGSHFDDFVTNLIEK;LTAEAEELKPFFMK	tr|B1APM4|B1APM4_HUMAN Isoform of P35610, Sterol O-acyltransferase 1 (Fragment) OS=Homo sapiens OX=9606 GN=SOAT1 PE=1 SV=1;sp|P35610|SOAT1_HUMAN Sterol O-acyltransferase 1 OS=Homo sapiens OX=9606 GN=SOAT1 PE=1 SV=3;sp|P35610-3|SOAT1_HUMAN Isoform of P35610	4268;10921	NaN;NaN
374	B1AQ74;Q6NSI4-2;Q6NSI4-4;Q6NSI4	B1AQ74;Q6NSI4-2;Q6NSI4-4;Q6NSI4	Uncharacterized protein CXorf57	CXorf57	NaN	NaN	NaN	1253700	NaN	NaN	NaN	NaN	NaN	4	1	1	1	2.5	2.5	2.5	65.136	1	-2	36357000	1253700	29	1	1	0	0	36357000	0	0	2.5	0	0	1	0	0	1	0	0	1	0	0	IISLSHLEMTWTNR	tr|B1AQ74|B1AQ74_HUMAN Isoform of Q6NSI4, Chromosome X open reading frame 57 (Fragment) OS=Homo sapiens OX=9606 GN=CXorf57 PE=1 SV=1;sp|Q6NSI4-2|RADX_HUMAN Isoform of Q6NSI4, Isoform 2 of RPA-related protein RADX OS=Homo sapiens OX=9606 GN=RADX;sp|Q6NSI4-4	7638	NaN
375	G3V4C1;B2R5W2;P07910-2;B4DY08;G3V4W0;P07910;G3V2Q1;G3V576;P07910-4;P07910-3;G3V2D6;G3V575;G3V555;G3V251;G3V3K6;G3V5V7;G3V5X6;B2RXH8;A0A0G2JPF8;A0A0G2JNQ3;P0DMR1;O60812;B7ZW38;B4DSU6;G3V4M8;G3V2H6;B3KT61;E5RG71;Q86SE5-3;Q86SE5	G3V4C1;B2R5W2;P07910-2;B4DY08;G3V4W0;P07910;G3V2Q1;G3V576;P07910-4;P07910-3;G3V2D6;G3V575;G3V555;G3V251;G3V3K6;G3V5V7;G3V5X6	Heterogeneous nuclear ribonucleoproteins C1/C2	HNRNPC	682590000	726330000	769540000	139990000	73518000	69304000	NaN	NaN	NaN	30	14	14	14	38.4	38.4	38.4	32.238	0	50.219	5525300000	282810000	18	73	24	24	25	2714900000	1445100000	1365300000	35.3	38.4	38.4	12	13	14	12	13	14	12	13	14	GDDLQAIK;GDDLQAIKK;GFAFVQYVNER;IVGCSVHK;LKGDDLQAIK;LKGDDLQAIKK;MIAGQVLDINLAAEPK;MYSYPAR;SAAEMYGSSFDLDYDFQR;SDVEAIFSK;VDSLLENLEK;VFIGNLNTLVVK;VFIGNLNTLVVKK;VPPPPPIAR	tr|G3V4C1|G3V4C1_HUMAN Isoform of P07910, Heterogeneous nuclear ribonucleoproteins C1/C2 OS=Homo sapiens OX=9606 GN=HNRNPC PE=1 SV=1;tr|B2R5W2|B2R5W2_HUMAN Isoform of P07910, Heterogeneous nuclear ribonucleoproteins C1/C2 OS=Homo sapiens OX=9606 GN=HNRNPC	5407;5408;5558;8351;9960;9961;11563;11840;13792;13961;16530;16717;16718;17455	NaN;NaN;NaN;NaN;NaN;NaN;NaN;NaN;NaN;NaN;NaN;NaN;NaN;NaN
376	B3KT28;Q9UNN5	B3KT28;Q9UNN5	FAS-associated factor 1	FAF1	NaN	NaN	NaN	345000	145750	NaN	NaN	NaN	NaN	2	2	2	2	2.6	2.6	2.6	53.653	0.00043066	3.1774	11778000	345000	24	1	1	0	0	8280000	3498000	0	2.4	2.6	0	1	1	0	1	1	0	1	1	0	NVYDLTSIPVR;RNVYDLTSIPVR	tr|B3KT28|B3KT28_HUMAN Isoform of Q9UNN5, cDNA FLJ37524 fis, clone BRCAN2007119, highly similar to FAS-associated factor 1 OS=Homo sapiens OX=9606 GN=FAF1 PE=1 SV=1;sp|Q9UNN5|FAF1_HUMAN FAS-associated factor 1 OS=Homo sapiens OX=9606 GN=FAF1 PE=1 SV=2	12655;13659	NaN;NaN
377	B4DDD6;Q9UJU6;Q9UJU6-2;Q9UJU6-3;F8WC20;F8WBB2;F8WFE1;F8WBG8;Q9UJU6-6;F2Z2V3;F8WB73;F8WCK3;F2Z3E3;H0Y5J4;Q9UJU6-5;Q9UJU6-4	B4DDD6;Q9UJU6;Q9UJU6-2;Q9UJU6-3;F8WC20;F8WBB2;F8WFE1;F8WBG8;Q9UJU6-6	Drebrin-like protein	DBNL	16961000	20905000	19868000	2151300	981000	983250	NaN	NaN	NaN	16	3	3	3	11.1	11.1	11.1	45.746	0	21.911	74080000	4115600	18	8	3	2	3	38724000	17658000	17698000	11.1	6.7	11.1	3	2	3	3	2	3	3	2	3	FQDVGPQAPVGSVYQK;NGPALQEAYVR;SPTDWALFTYEGNSNDIR	tr|B4DDD6|B4DDD6_HUMAN Isoform of Q9UJU6, cDNA FLJ59450, highly similar to Drebrin-like protein OS=Homo sapiens OX=9606 GN=DBNL PE=1 SV=1;sp|Q9UJU6|DBNL_HUMAN Drebrin-like protein OS=Homo sapiens OX=9606 GN=DBNL PE=1 SV=1;sp|Q9UJU6-2|DBNL_HUMAN Isoform of	5006;12079;14687	NaN;NaN;NaN
378	B4DDF4;B4DUT8;Q99439;A0A087X271;Q99439-2;H3BVI6;A0A087X1X5;K7ES69;H3BQH0;U3KPS3;A0A087WV51	B4DDF4;B4DUT8;Q99439;A0A087X271;Q99439-2;H3BVI6;A0A087X1X5;K7ES69	Calponin;Calponin-2	CNN2	53360000	61119000	67036000	10927000	7951900	7650700	NaN	NaN	NaN	11	12	12	11	52	52	48.3	32.616	0	29.352	407890000	26530000	14	20	6	6	8	168410000	111330000	128160000	28.5	32.9	38.6	7	8	9	7	8	9	6	7	8	AGQCVIGLQMGTNK;CASQSGMTAYGTR;CASQVGMTAPGTR;DGTILCTLMNK;GLKDGTILCTLMNKLQPGSVPK;GLQSGVDIGVK;GPSYGLSAEVK;NFDDATMK;NHILPPMDHSTISLQMGTNK;SMQNWHQLENLSNFIK;TWIEGLTGLSIGPDFQK;YDPQKEAELR	tr|B4DDF4|B4DDF4_HUMAN Isoform of Q99439, Calponin OS=Homo sapiens OX=9606 GN=CNN2 PE=1 SV=1;tr|B4DUT8|B4DUT8_HUMAN Isoform of Q99439, Calponin OS=Homo sapiens OX=9606 GN=CNN2 PE=1 SV=1;sp|Q99439|CNN2_HUMAN Calponin-2 OS=Homo sapiens OX=9606 GN=CNN2 PE=1 S	611;1755;1756;2309;5972;6019;6197;12013;12106;14585;16222;18182	NaN;NaN;NaN;NaN;NaN;NaN;NaN;NaN;NaN;NaN;NaN;NaN
379	U3KQP3;B4DEZ3;K7EJE1;E7ENQ6;Q9P0J0;Q9P0J0-2	U3KQP3;B4DEZ3;K7EJE1;E7ENQ6;Q9P0J0;Q9P0J0-2	NADH dehydrogenase [ubiquinone] 1 alpha subcomplex subunit 13	NDUFA13	NaN	NaN	NaN	1645600	8330400	5005400	NaN	NaN	NaN	6	1	1	1	18.7	18.7	18.7	8.5979	0	7.461	84752000	1645600	3	6	3	2	1	44745000	24991000	15016000	18.7	18.7	18.7	1	1	1	1	1	1	1	1	1	IALLPLLQAETDRR	tr|U3KQP3|U3KQP3_HUMAN Isoform of Q9P0J0, NADH dehydrogenase [ubiquinone] 1 alpha subcomplex subunit 13 (Fragment) OS=Homo sapiens OX=9606 GN=NDUFA13 PE=4 SV=2;tr|B4DEZ3|B4DEZ3_HUMAN Isoform of Q9P0J0, NADH dehydrogenase [ubiquinone] 1 alpha subcomplex sub	7057	NaN
380	J3KTC1;B4DHE8;Q96DH6-2;Q96DH6;J3QKT5;B4DM51;Q96DH6-3	J3KTC1;B4DHE8;Q96DH6-2;Q96DH6;J3QKT5;B4DM51;Q96DH6-3	RNA-binding protein Musashi homolog 2	MSI2	NaN	NaN	NaN	1411900	766490	NaN	NaN	NaN	NaN	7	2	2	2	22.1	22.1	22.1	15.46	0	5.0698	15249000	2178400	7	2	1	1	0	9883100	5365500	0	10.7	11.4	0	1	1	0	1	1	0	1	1	0	GFGFVTFADPASVDK;IFVGGLSANTVVEDVK	tr|J3KTC1|J3KTC1_HUMAN Isoform of Q96DH6, RNA-binding protein Musashi homolog 2 (Fragment) OS=Homo sapiens OX=9606 GN=MSI2 PE=1 SV=8;tr|B4DHE8|B4DHE8_HUMAN Isoform of Q96DH6, cDNA FLJ56904, highly similar to RNA-binding protein Musashi homolog 2 OS=Homo sa	5606;7385	NaN;NaN
381	B4DIH5;P61201;P61201-2;H0YKU5;H0YM03;H0YMC2	B4DIH5;P61201;P61201-2;H0YKU5	COP9 signalosome complex subunit 2	COPS2	NaN	NaN	NaN	1278500	225800	167110	NaN	NaN	NaN	6	5	5	5	15.3	15.3	15.3	44.228	0	8.597	85902000	1504300	19	5	3	1	1	68614000	14113000	3175000	15.3	5.5	2.6	5	2	1	5	2	1	5	2	1	AHTDFFEAFK;IDQVNQLLELDHQK;IHIPFISK;SAIPHPLIMGVIR;SINSILDYISTSK	tr|B4DIH5|B4DIH5_HUMAN Isoform of P61201, cDNA FLJ52928, highly similar to COP9 signalosome complex subunit 2 OS=Homo sapiens OX=9606 GN=COPS2 PE=1 SV=1;sp|P61201|CSN2_HUMAN COP9 signalosome complex subunit 2 OS=Homo sapiens OX=9606 GN=COPS2 PE=1 SV=1;sp|P	681;7192;7517;13829;14301	NaN;NaN;NaN;NaN;NaN
382	B4DJ81;P28331-3;P28331-4;P28331-5;P28331;P28331-2	B4DJ81;P28331-3;P28331-4;P28331-5;P28331;P28331-2	NADH-ubiquinone oxidoreductase 75 kDa subunit, mitochondrial	NDUFS1	23165000	24629000	NaN	439670	367490	127740	NaN	NaN	NaN	6	6	6	6	15.2	15.2	15.2	66.921	0	11.887	96099000	934900	35	10	5	4	1	72214000	19414000	4470800	13.6	7.4	2.6	5	3	1	5	3	1	5	3	1	FEAPLFNAR;ILQDIASGSHPFSQVLK;LVNQQLLADPLVPPQLTIK;NDGAAILAAVSSIAQK;VALIGSPVDLTYTYDHLGDSPK;VAVTPPGLAR	tr|B4DJ81|B4DJ81_HUMAN Isoform of P28331, NADH-ubiquinone oxidoreductase 75 kDa subunit, mitochondrial OS=Homo sapiens OX=9606 GN=NDUFS1 PE=1 SV=1;sp|P28331-3|NDUS1_HUMAN Isoform of P28331, Isoform 3 of NADH-ubiquinone oxidoreductase 75 kDa subunit, mitoch	4536;7832;11181;11931;16339;16405	NaN;NaN;NaN;NaN;NaN;NaN
383	O75390;B4DJV2;A0A0C4DGI3;H0YIC4;F8VTT8;H0YH82;F8W4S1;F8W1S4;F8VPA1;F8VRI6;F8VPF9;F8VX68;F8VRP1;F8VZK9;F8VR34;F8VWQ5;F8VX07;F8W642	O75390;B4DJV2;A0A0C4DGI3	Citrate synthase, mitochondrial;Citrate synthase	CS	192230000	219390000	200080000	30423000	23060000	15145000	NaN	NaN	NaN	18	13	13	12	34.3	34.3	32.4	51.712	0	39.218	1517000000	68628000	19	39	13	15	11	685470000	499830000	331740000	32.4	22.1	20.2	12	10	9	12	10	9	11	9	8	AALPSHVVTMLDNFPTNLHPMSQLSAAVTALNSESNFAR;ALGFPLERPK;ALGVLAQLIWSR;DILADLIPK;DYIWNTLNSGR;GFSIPECQK;GLVYETSVLDPDEGIR;HLPNDPMFK;IVPNVLLEQGK;LPCVAAK;LVAQLYK;SMSTEGLMK;VVPGYGHAVLR	sp|O75390|CISY_HUMAN Citrate synthase, mitochondrial OS=Homo sapiens OX=9606 GN=CS PE=1 SV=2;tr|B4DJV2|B4DJV2_HUMAN Isoform of O75390, Citrate synthase OS=Homo sapiens OX=9606 GN=CS PE=1 SV=1;tr|A0A0C4DGI3|A0A0C4DGI3_HUMAN Isoform of O75390, Citrate syntha	116;924;935;2401;3068;5641;6057;6784;8389;10484;11085;14588;17868	NaN;NaN;NaN;NaN;NaN;NaN;NaN;NaN;NaN;NaN;NaN;NaN;NaN
384	B4DJV5;Q13610	B4DJV5;Q13610	Periodic tryptophan protein 1 homolog	PWP1	NaN	NaN	NaN	945690	399060	403440	NaN	NaN	NaN	2	2	2	2	8.2	8.2	8.2	49.038	0.00046339	3.7874	44416000	1748200	21	4	1	1	2	19860000	8380300	16176000	4.8	4.8	8.2	1	1	2	1	1	2	1	1	2	IWDILGDRPSLVHSR;VQTLQFHPFEAQTLISGSYDK	tr|B4DJV5|B4DJV5_HUMAN Isoform of Q13610, cDNA FLJ51513, highly similar to Periodic tryptophan protein 1 homolog OS=Homo sapiens OX=9606 GN=PWP1 PE=1 SV=1;sp|Q13610|PWP1_HUMAN Periodic tryptophan protein 1 homolog OS=Homo sapiens OX=9606 GN=PWP1 PE=1 SV=1	8420;17538	NaN;NaN
385	B4DK25;B4E107;F5GXE4;H0Y5C2;O95260-2;O95260	B4DK25;B4E107;F5GXE4;H0Y5C2;O95260-2;O95260	Arginyl-tRNA--protein transferase 1	ATE1	NaN	NaN	NaN	NaN	292560	203560	NaN	NaN	NaN	6	1	1	1	4.2	4.2	4.2	45.831	0.0029963	2.23	8434100	496120	17	2	0	1	1	0	4973500	3460500	0	4.2	4.2	0	1	1	0	1	1	0	1	1	SLEDLIFESLPENASHK	tr|B4DK25|B4DK25_HUMAN Isoform of O95260, Arginyl-tRNA--protein transferase 1 OS=Homo sapiens OX=9606 GN=ATE1 PE=1 SV=1;tr|B4E107|B4E107_HUMAN Isoform of O95260, Arginyl-tRNA--protein transferase 1 OS=Homo sapiens OX=9606 GN=ATE1 PE=1 SV=1;tr|F5GXE4|F5GXE4	14401	NaN
386	B4DKB2;P42892-3;P42892-2;P42892-4;P42892	B4DKB2;P42892-3;P42892-2;P42892-4;P42892	Endothelin-converting enzyme 1	ECE1	13262000	6045300	5575200	90200	23815	21145	NaN	NaN	NaN	5	2	2	2	5.6	5.6	5.6	83.573	0	11.378	24684000	135160	40	7	3	2	2	18336000	3429100	2918100	5.6	5.6	5.6	2	2	2	2	2	2	2	2	2	ALNFGGIGVVVGHELTHAFDDQGR;NEIVFPAGILQAPFYTR	tr|B4DKB2|B4DKB2_HUMAN Isoform of P42892, Endothelin-converting enzyme 1 OS=Homo sapiens OX=9606 GN=ECE1 PE=1 SV=1;sp|P42892-3|ECE1_HUMAN Isoform of P42892, Isoform C of Endothelin-converting enzyme 1 OS=Homo sapiens OX=9606 GN=ECE1;sp|P42892-2|ECE1_HUMAN	997;11988	NaN;NaN
387	B4DKY1;P49589-2;P49589;P49589-3	B4DKY1;P49589-2;P49589;P49589-3	Cysteine--tRNA ligase, cytoplasmic	CARS	16295000	23642000	23060000	774160	518420	473660	NaN	NaN	NaN	4	3	3	3	3.4	3.4	3.4	84.277	0	8.6771	80591000	1766200	40	7	3	2	2	40907000	20737000	18946000	3.4	3	3	3	2	2	3	2	2	3	2	2	DNILPELGVR;EQKVPEILQLSDALR;VPEILQLSDALR	tr|B4DKY1|B4DKY1_HUMAN Isoform of P49589, Cysteine--tRNA ligase, cytoplasmic OS=Homo sapiens OX=9606 GN=CARS PE=1 SV=1;sp|P49589-2|SYCC_HUMAN Isoform of P49589, Isoform 2 of Cysteine--tRNA ligase, cytoplasmic OS=Homo sapiens OX=9606 GN=CARS;sp|P49589|SYCC_	2713;4053;17417	NaN;NaN;NaN
388	B4DL54;P49356-2;P49356	B4DL54;P49356-2;P49356	Protein farnesyltransferase subunit beta	CHURC1-FNTB;FNTB	NaN	NaN	NaN	170730	354780	NaN	NaN	NaN	NaN	3	2	2	2	5.9	5.9	5.9	52.785	0.0068247	1.8686	9459200	354780	18	2	1	1	0	3073100	6386100	0	4	1.9	0	1	1	0	1	1	0	1	1	0	LLQYLYSLK;LVDGCYSFWQAGLLPLLHR	tr|B4DL54|B4DL54_HUMAN CHURC1-FNTB readthrough OS=Homo sapiens OX=9606 GN=CHURC1-FNTB PE=2 SV=1;sp|P49356-2|FNTB_HUMAN Isoform of P49356, Isoform 2 of Protein farnesyltransferase subunit beta OS=Homo sapiens OX=9606 GN=FNTB;sp|P49356|FNTB_HUMAN Protein far	10273;11093	NaN;NaN
389	B4DLN1;I3L1E8;F6RGN5;Q9UBX3;Q9UBX3-2	B4DLN1			47299000	19665000	24256000	1826500	595420	659440	NaN	NaN	NaN	5	5	5	2	21.3	21.3	9.3	48.099	0	13.987	81654000	3081400	21	10	4	3	3	50794000	14579000	16281000	21.3	15.4	15.4	5	3	3	5	3	3	2	1	1	IQDVGLVPMGGVMSGAVPAAAAQEAVEEDIPIAK;LTEAKPVDK;LVESLPQEIK;TDGILALYSGLSASLCR;VLLGSVSGLAGGFVGTPADLVNVR	tr|B4DLN1|B4DLN1_HUMAN cDNA FLJ60124, highly similar to Mitochondrial dicarboxylate carrier OS=Homo sapiens OX=9606 PE=2 SV=1	8025;10940;11110;15218;17160	NaN;NaN;NaN;NaN;NaN
390	B4DLR8;P15559-3;P15559-2;P15559;H3BNV2;H3BRK3	B4DLR8;P15559-3;P15559-2;P15559;H3BNV2;H3BRK3	NAD(P)H dehydrogenase [quinone] 1	NQO1	761220000	762820000	699270000	135610000	69114000	57424000	NaN	NaN	NaN	6	12	12	12	53.5	53.5	53.5	22.793	0	79.879	5532400000	262150000	11	49	17	17	15	2830400000	1468800000	1233200000	53.5	53.5	53.5	11	11	10	11	11	10	11	11	10	ALIVLAHSER;DPANFQYPAESVLAYK;EAAAAALKK;EGHLSPDIVAEQK;FGLSVGHHLGK;GWEVVESDLYAMNFNPIISR;IQILEGWK;IQILEGWKK;KGWEVVESDLYAMNFNPIISR;LKDPANFQYPAESVLAYK;SIPTDNQIK;TSFNYAMK	tr|B4DLR8|B4DLR8_HUMAN Isoform of P15559, NAD(P)H dehydrogenase [quinone] 1 OS=Homo sapiens OX=9606 GN=NQO1 PE=1 SV=1;sp|P15559-3|NQO1_HUMAN Isoform of P15559, Isoform 3 of NAD(P)H dehydrogenase [quinone] 1 OS=Homo sapiens OX=9606 GN=NQO1;sp|P15559-2|NQO1_	947;2748;3097;3510;4674;6483;8051;8052;8711;9948;14311;15977	NaN;NaN;NaN;NaN;NaN;NaN;NaN;NaN;NaN;NaN;NaN;NaN
391	Q49AI2;B4DML3;Q86WA6-2;Q86WA6	Q49AI2;B4DML3;Q86WA6-2;Q86WA6	Valacyclovir hydrolase	BPHL	NaN	NaN	NaN	126970	NaN	NaN	NaN	NaN	NaN	4	1	1	1	9.8	9.8	9.8	21.531	0.0099397	1.7703	1015800	126970	8	1	1	0	0	1015800	0	0	9.8	0	0	1	0	0	1	0	0	1	0	0	VSLLGWSDGGITALIAAAK	tr|Q49AI2|Q49AI2_HUMAN Isoform of Q86WA6, BPHL protein OS=Homo sapiens OX=9606 GN=BPHL PE=1 SV=1;tr|B4DML3|B4DML3_HUMAN Isoform of Q86WA6, Valacyclovir hydrolase OS=Homo sapiens OX=9606 GN=BPHL PE=1 SV=1;sp|Q86WA6-2|BPHL_HUMAN Isoform of Q86WA6, Isoform 2	17613	NaN
392	C9J168;B4DP31;Q14558;Q14558-2;C9JUN4;C9JKT9;C9JNQ3	C9J168;B4DP31;Q14558;Q14558-2;C9JUN4	Phosphoribosyl pyrophosphate synthase-associated protein 1	PRPSAP1	NaN	NaN	NaN	708280	304980	246290	NaN	NaN	NaN	7	3	2	2	19.1	13	13	25.377	0	10.258	18893000	1259600	15	4	2	1	1	10624000	4574800	3694400	19.1	5.7	11.7	3	1	2	2	1	1	2	1	1	ASPFLLQYIQEEIPNYR;EKPPITVVGDVGGR;NIIGVIPYFPYSK	tr|C9J168|C9J168_HUMAN Isoform of Q14558, Phosphoribosyl pyrophosphate synthase-associated protein 1 (Fragment) OS=Homo sapiens OX=9606 GN=PRPSAP1 PE=1 SV=1;tr|B4DP31|B4DP31_HUMAN Isoform of Q14558, Phosphoribosyl pyrophosphate synthase-associated protein	1421;3695;12145	NaN;NaN;NaN
393	B4DPU0;Q8NCC3-2;Q8NCC3	B4DPU0;Q8NCC3-2;Q8NCC3	Group XV phospholipase A2	PLA2G15	NaN	NaN	NaN	3795600	NaN	NaN	NaN	NaN	NaN	3	1	1	1	7.5	7.5	7.5	23.935	1	-2	34161000	3795600	9	1	1	0	0	34161000	0	0	7.5	0	0	1	0	0	1	0	0	1	0	0	VFVQTPTINYTLRDYR	tr|B4DPU0|B4DPU0_HUMAN Isoform of Q8NCC3, Group XV phospholipase A2 OS=Homo sapiens OX=9606 GN=PLA2G15 PE=1 SV=1;sp|Q8NCC3-2|PAG15_HUMAN Isoform of Q8NCC3, Isoform 2 of Group XV phospholipase A2 OS=Homo sapiens OX=9606 GN=PLA2G15;sp|Q8NCC3|PAG15_HUMAN Grou	16757	NaN
394	B4DR61;P61619;P61619-3	B4DR61;P61619;P61619-3	Protein transport protein Sec61 subunit alpha isoform 1	SEC61A1	NaN	NaN	NaN	764840	95759	NaN	NaN	NaN	NaN	3	3	3	3	11.2	11.2	11.2	52.949	0	8.5067	33885000	764840	16	5	3	2	0	28162000	5723400	0	11.2	4.1	0	3	1	0	3	1	0	3	1	0	AFSPTTVNTGR;FLEVIKPFCVILPEIQKPER;FSGNLLVSLLGTWSDTSSGGPAR	tr|B4DR61|B4DR61_HUMAN Isoform of P61619, cDNA FLJ59739, highly similar to Protein transport protein Sec61 subunit alpha isoform 1 OS=Homo sapiens OX=9606 GN=SEC61A1 PE=1 SV=1;sp|P61619|S61A1_HUMAN Protein transport protein Sec61 subunit alpha isoform 1 OS	523;4837;5087	NaN;NaN;NaN
395	B4DUC8;Q13126-4;Q13126;Q13126-3;Q13126-2;J3QSB7;Q13126-7;Q13126-6;Q13126-5;F2Z2F3;F8WES2;A0A2R8Y4K0;J3KRN1	B4DUC8;Q13126-4;Q13126;Q13126-3;Q13126-2;J3QSB7;Q13126-7;Q13126-6;Q13126-5;F2Z2F3	S-methyl-5-thioadenosine phosphorylase;Purine nucleoside phosphorylase	MTAP	49716000	33716000	29735000	2002800	1568200	1633400	NaN	NaN	NaN	13	6	6	6	34.3	34.3	34.3	33.186	0	17.762	145760000	5204400	20	16	4	5	7	49248000	56396000	40114000	19.3	26.7	28.7	3	5	5	3	5	5	3	5	5	EEIQPGDIVIIDQFIDR;IGIIGGTGLDDPEILEGR;NVDCVLLAR;SLLLTTIPQIGSTEWSETLHNLK;TWGADVINMTTVPEVVLAK;YVDTPFGKPSDALILGK	tr|B4DUC8|B4DUC8_HUMAN Isoform of Q13126, S-methyl-5-thioadenosine phosphorylase OS=Homo sapiens OX=9606 GN=MTAP PE=1 SV=1;sp|Q13126-4|MTAP_HUMAN Isoform of Q13126, Isoform 4 of S-methyl-5-thioadenosine phosphorylase OS=Homo sapiens OX=9606 GN=MTAP;sp|Q1	3366;7442;12560;14480;16221;18644	NaN;NaN;NaN;NaN;NaN;NaN
396	B4DV59;E9PQE5;Q9P2K3-2;Q9P2K3-4;Q9P2K3;Q9P2K3-3	B4DV59;E9PQE5;Q9P2K3-2;Q9P2K3-4;Q9P2K3;Q9P2K3-3	REST corepressor 3	RCOR3	NaN	NaN	NaN	102980	2276600	2266100	NaN	NaN	NaN	6	2	2	1	8	8	2.7	41.802	0	6.535	97559000	4645700	21	3	1	1	1	2162500	47808000	47588000	5.3	2.7	2.7	1	1	1	1	1	1	0	1	1	IPEFDPVETR;SLADLPNFTPFPDEWTVEDK	tr|B4DV59|B4DV59_HUMAN Isoform of Q9P2K3, cDNA FLJ59439, highly similar to REST corepressor 3 OS=Homo sapiens OX=9606 GN=RCOR3 PE=1 SV=1;tr|E9PQE5|E9PQE5_HUMAN Isoform of Q9P2K3, REST corepressor 3 (Fragment) OS=Homo sapiens OX=9606 GN=RCOR3 PE=1 SV=1;sp|Q	7972;14366	NaN;NaN
397	B4DXZ6;P51114-2;P51114;E9PFF5;C9JAJ4;E7EU85;P51114-3	B4DXZ6;P51114-2;P51114;E9PFF5;C9JAJ4;E7EU85;P51114-3	Fragile X mental retardation syndrome-related protein 1	FXR1	NaN	NaN	NaN	2227100	417530	620670	NaN	NaN	NaN	7	4	4	3	7.7	7.7	6.4	68.326	0	9.2744	88163000	3265300	27	5	3	1	1	60132000	11273000	16758000	6.4	1.3	2.6	3	1	2	3	1	2	2	0	1	ANDQEPCGWWLAK;KVPGVTAIELDEDTGTFR;LPPPPDIK;VIQEIVDK	tr|B4DXZ6|B4DXZ6_HUMAN Isoform of P51114, cDNA FLJ58644, highly similar to Fragile X mental retardation syndrome-related protein 1 OS=Homo sapiens OX=9606 GN=FXR1 PE=1 SV=1;sp|P51114-2|FXR1_HUMAN Isoform of P51114, Isoform 2 of Fragile X mental retardation	1134;8928;10552;16979	NaN;NaN;NaN;NaN
398	B4DY09;Q12905;X6R6Z1;A0A0A0MRL0	B4DY09;Q12905	Interleukin enhancer-binding factor 2	ILF2	128380000	140110000	131510000	30675000	11663000	10446000	NaN	NaN	NaN	4	14	14	14	59.4	59.4	59.4	38.91	0	57.764	1154100000	52784000	17	48	17	14	17	643210000	269080000	241790000	53.1	40.9	49.7	13	9	11	13	9	11	13	9	11	AQDPSEVLTMLTNETGFEISSSDATVK;AYEKPPEKK;ILGQEGDASYLASEISTWDGVIVTPSEK;ILITTVPPNLR;ILPTLEAVAALGNK;ILSHGGFR;INNVIDNLIVAPGTFEVQIEEVR;KLDPELHLDIK;LDPELHLDIK;NQDLAPNSAEQASILSLVTK;QPLALNVAYR;VHTVMTLEQQDMVCYTAQTLVR;VKPAPDETSFSEALLK;VLQSALAAIR	tr|B4DY09|B4DY09_HUMAN Isoform of Q12905, cDNA FLJ51660, highly similar to Interleukin enhancer-binding factor 2 OS=Homo sapiens OX=9606 GN=ILF2 PE=1 SV=1;sp|Q12905|ILF2_HUMAN Interleukin enhancer-binding factor 2 OS=Homo sapiens OX=9606 GN=ILF2 PE=1 SV=2	1264;1711;7757;7782;7826;7847;7941;8749;9266;12439;13223;16895;17017;17220	NaN;NaN;NaN;NaN;NaN;NaN;NaN;NaN;NaN;NaN;NaN;NaN;NaN;NaN
399	B4DYP1;O94760-2;O94760	B4DYP1;O94760-2;O94760	N(G),N(G)-dimethylarginine dimethylaminohydrolase 1	DDAH1	NaN	NaN	NaN	1525700	NaN	32204000	NaN	NaN	NaN	3	2	2	2	10.3	10.3	10.3	20.535	0.0054685	1.9928	404760000	33730000	12	2	1	0	1	18309000	0	386450000	10.3	0	5.4	2	0	1	2	0	1	2	0	1	GAEILADTFK;LQLNIVEMK	tr|B4DYP1|B4DYP1_HUMAN Isoform of O94760, N(G),N(G)-dimethylarginine dimethylaminohydrolase 1 OS=Homo sapiens OX=9606 GN=DDAH1 PE=1 SV=1;sp|O94760-2|DDAH1_HUMAN Isoform of O94760, Isoform 2 of N(G),N(G)-dimethylarginine dimethylaminohydrolase 1 OS=Homo sap	5317;10676	NaN;NaN
400	B4E0K5;Q16539-2;Q16539;H7C4E2;E7EX54;B5TY33;Q16539-5;Q16539-3;Q16539-4	B4E0K5;Q16539-2;Q16539;H7C4E2;E7EX54;B5TY33;Q16539-5;Q16539-3;Q16539-4	Mitogen-activated protein kinase 14	MAPK14	NaN	NaN	NaN	595180	272670	181550	NaN	NaN	NaN	9	2	2	2	8.1	8.1	8.1	32.357	0	5.812	22694000	595180	15	4	2	1	1	15881000	4090000	2723300	8.1	5.3	5.3	2	1	1	2	1	1	2	1	1	DLLIDEWK;HENVIGLLDVFTPAR	tr|B4E0K5|B4E0K5_HUMAN Isoform of Q16539, Mitogen-activated protein kinase OS=Homo sapiens OX=9606 GN=MAPK14 PE=1 SV=1;sp|Q16539-2|MK14_HUMAN Isoform of Q16539, Isoform CSBP1 of Mitogen-activated protein kinase 14 OS=Homo sapiens OX=9606 GN=MAPK14;sp|Q1653	2592;6627	NaN;NaN
401	Q8NBY1;Q9P289-2;Q9P289;B4E0Y9;C9JDH9;O00506-3;C9JCC0;O00506-2;O00506;C9J232;H7C279;C9J6L2;Q9Y6E0;H0Y630;B4DR80;Q9Y6E0-2;Q5JV98;Q9P289-3;C9JJV0	Q8NBY1;Q9P289-2;Q9P289;B4E0Y9;C9JDH9;O00506-3;C9JCC0;O00506-2;O00506;C9J232;H7C279;C9J6L2;Q9Y6E0;H0Y630;B4DR80;Q9Y6E0-2	Serine/threonine-protein kinase 26;Serine/threonine-protein kinase 25;Serine/threonine-protein kinase 24;Serine/threonine-protein kinase 24 36 kDa subunit;Serine/threonine-protein kinase 24 12 kDa subunit	STK26;STK25;STK24	33669000	44943000	43897000	2671400	1800200	1654400	NaN	NaN	NaN	19	4	4	4	12.8	12.8	12.8	43.867	0	9.1987	134770000	6125900	22	9	3	3	3	58770000	39604000	36396000	9.7	8.9	8.9	3	3	3	3	3	3	3	3	3	ADIWSLGITAIELAK;LADFGVAGQLTDTQIK;NNPPTLVGDFTK;VLFLIPK	tr|Q8NBY1|Q8NBY1_HUMAN Isoform of Q9P289, Serine/threonine-protein kinase 26 OS=Homo sapiens OX=9606 GN=STK26 PE=1 SV=1;sp|Q9P289-2|STK26_HUMAN Isoform of Q9P289, Isoform 2 of Serine/threonine-protein kinase 26 OS=Homo sapiens OX=9606 GN=STK26;sp|Q9P289|ST	291;8990;12383;17108	NaN;NaN;NaN;NaN
402	E5RGY0;B4E1G1;Q9BUN8-2;Q9BUN8	E5RGY0;B4E1G1;Q9BUN8-2;Q9BUN8	Derlin-1	DERL1	NaN	NaN	NaN	3651700	NaN	NaN	NaN	NaN	NaN	4	1	1	1	7.3	7.3	7.3	17.221	0.0004817	4.2098	21910000	3651700	6	1	1	0	0	21910000	0	0	7.3	0	0	1	0	0	1	0	0	1	0	0	NFLSTPQFLYR	tr|E5RGY0|E5RGY0_HUMAN Isoform of Q9BUN8, Derlin OS=Homo sapiens OX=9606 GN=DERL1 PE=1 SV=1;tr|B4E1G1|B4E1G1_HUMAN Isoform of Q9BUN8, Derlin OS=Homo sapiens OX=9606 GN=DERL1 PE=1 SV=1;sp|Q9BUN8-2|DERL1_HUMAN Isoform of Q9BUN8, Isoform 2 of Derlin-1 OS=Homo	12041	NaN
403	B4E2I4;P48506;A0A2R8YEL6;E1CEI4;A0A0C4DGB2;A0A2R8Y648	B4E2I4;P48506;A0A2R8YEL6;E1CEI4;A0A0C4DGB2	Glutamate--cysteine ligase catalytic subunit	GCLC	42753000	53750000	43804000	3379800	1944500	977960	NaN	NaN	NaN	6	9	9	9	20.4	20.4	20.4	66.463	0	27.144	239480000	6302200	30	12	4	4	4	117430000	75277000	46777000	10.1	13.7	12.5	5	6	5	5	6	5	5	6	5	CSILNYLK;DPLTLFEEK;EATSILEENQALCTITSFPR;FKPPPPNSDIGWR;LDFLIPLSK;LGCPGFTLPEVKPNPVEGGASK;NTPSPFIETFTEDDEASR;SLFFPDEAINK;VVINVPIFK	tr|B4E2I4|B4E2I4_HUMAN Isoform of P48506, Glutamate--cysteine ligase catalytic subunit OS=Homo sapiens OX=9606 GN=GCLC PE=1 SV=1;sp|P48506|GSH1_HUMAN Glutamate--cysteine ligase catalytic subunit OS=Homo sapiens OX=9606 GN=GCLC PE=1 SV=2;tr|A0A2R8YEL6|A0A2R	1921;2762;3223;4813;9214;9612;12543;14420;17832	NaN;NaN;NaN;NaN;NaN;NaN;NaN;NaN;NaN
404	B5MBZ0;Q9HC35-2;Q9HC35	B5MBZ0;Q9HC35-2;Q9HC35	Echinoderm microtubule-associated protein-like 4	EML4	NaN	NaN	NaN	380150	78233	151620	NaN	NaN	NaN	3	3	3	3	3.6	3.6	3.6	110.18	0	5.1888	30500000	610000	50	4	1	1	2	19007000	3911700	7580900	2	1.6	2.4	2	1	2	2	1	2	2	1	2	AALADVLR;EIEVPDQYGTIR;LSLPQNETVADTTLTK	tr|B5MBZ0|B5MBZ0_HUMAN Isoform of Q9HC35, Echinoderm microtubule-associated protein-like 4 OS=Homo sapiens OX=9606 GN=EML4 PE=1 SV=3;sp|Q9HC35-2|EMAL4_HUMAN Isoform of Q9HC35, Isoform 2 of Echinoderm microtubule-associated protein-like 4 OS=Homo sapiens OX	97;3625;10855	NaN;NaN;NaN
405	B5MC35;B5MD16;B5MCA1;Q96G28;Q96G28-2	B5MC35;B5MD16;B5MCA1;Q96G28;Q96G28-2	Cilia- and flagella-associated protein 36	CFAP36	NaN	NaN	NaN	328630	76594	NaN	NaN	NaN	NaN	5	1	1	1	9.6	9.6	9.6	24.971	0.0022857	2.3176	4052300	405230	10	2	1	1	0	3286300	765940	0	9.6	9.6	0	1	1	0	1	1	0	1	1	0	THTSQAILQPVLAAEDFTIFK	tr|B5MC35|B5MC35_HUMAN Isoform of Q96G28, Cilia- and flagella-associated protein 36 OS=Homo sapiens OX=9606 GN=CFAP36 PE=1 SV=1;tr|B5MD16|B5MD16_HUMAN Isoform of Q96G28, Cilia- and flagella-associated protein 36 OS=Homo sapiens OX=9606 GN=CFAP36 PE=1 SV=1;	15503	NaN
406	G5E9F5;B5MC53;B5MCF8;P39210	G5E9F5;B5MC53;B5MCF8;P39210	Protein Mpv17	MPV17	NaN	NaN	NaN	366930	NaN	NaN	NaN	NaN	NaN	4	1	1	1	20.4	20.4	20.4	12.958	0.0015649	2.4783	1467700	366930	4	1	1	0	0	1467700	0	0	20.4	0	0	1	0	0	1	0	0	1	0	0	VQVLTAGSLMGLGDIISQQLVER	tr|G5E9F5|G5E9F5_HUMAN Isoform of P39210, MpV17 transgene, murine homolog, glomerulosclerosis, isoform CRA_d OS=Homo sapiens OX=9606 GN=MPV17 PE=1 SV=1;tr|B5MC53|B5MC53_HUMAN Isoform of P39210, MpV17 transgene, murine homolog, glomerulosclerosis, isoform C	17543	NaN
407	Q9HCU5;B5MC98;F8WCS5	Q9HCU5;B5MC98;F8WCS5	Prolactin regulatory element-binding protein	PREB	6602800	NaN	3015500	547710	57504	103620	NaN	NaN	NaN	3	2	2	2	12.2	12.2	12.2	45.468	0	8.2198	12759000	708830	18	5	2	1	2	9858800	1035100	1865100	12.2	5.8	12.2	2	1	2	2	1	2	2	1	2	APFPLYALQVDPSTGLLIAAGGGGAAK;ATMNLALAGDILAAGQDAHCQLLR	sp|Q9HCU5|PREB_HUMAN Prolactin regulatory element-binding protein OS=Homo sapiens OX=9606 GN=PREB PE=1 SV=2;tr|B5MC98|B5MC98_HUMAN Isoform of Q9HCU5, Prolactin regulatory element-binding protein OS=Homo sapiens OX=9606 GN=PREB PE=1 SV=1;tr|F8WCS5|F8WCS5_HU	1190;1500	NaN;NaN
408	P16422;B5MCA4;C9JKY3	P16422;B5MCA4;C9JKY3	Epithelial cell adhesion molecule	EPCAM	NaN	NaN	NaN	3102900	187370	185760	NaN	NaN	NaN	3	3	3	3	16.6	16.6	16.6	34.932	0	10.451	75015000	3476000	14	6	4	1	1	69791000	2623200	2600600	16.6	5.1	5.1	3	1	1	3	1	1	3	1	1	AKPEGALQNNDGLYDPDCDESGLFK;LAVNCFVNNNR;TQNDVDIADVAYYFEK	sp|P16422|EPCAM_HUMAN Epithelial cell adhesion molecule OS=Homo sapiens OX=9606 GN=EPCAM PE=1 SV=2;tr|B5MCA4|B5MCA4_HUMAN Isoform of P16422, Epithelial cell adhesion molecule OS=Homo sapiens OX=9606 GN=EPCAM PE=1 SV=1;tr|C9JKY3|C9JKY3_HUMAN Isoform of P164	815;9136;15932	NaN;NaN;NaN
409	C9JQQ5;B5MCN0;Q8NHH9-3;Q8NHH9-5;Q8NHH9-4;Q8NHH9-2;Q8NHH9	C9JQQ5;B5MCN0;Q8NHH9-3;Q8NHH9-5;Q8NHH9-4;Q8NHH9-2;Q8NHH9	Atlastin-2	ATL2	10107000	9414100	NaN	873240	348330	333020	NaN	NaN	NaN	7	1	1	1	8.6	8.6	8.6	20.3	0.008544	1.7884	22229000	1554600	12	4	1	2	1	12919000	5313900	3996200	8.6	8.6	8.6	1	1	1	1	1	1	1	1	1	NLVPLLLAPENLVEK	tr|C9JQQ5|C9JQQ5_HUMAN Isoform of Q8NHH9, Atlastin-2 (Fragment) OS=Homo sapiens OX=9606 GN=ATL2 PE=1 SV=1;tr|B5MCN0|B5MCN0_HUMAN Isoform of Q8NHH9, Atlastin-2 OS=Homo sapiens OX=9606 GN=ATL2 PE=1 SV=1;sp|Q8NHH9-3|ATLA2_HUMAN Isoform of Q8NHH9, Isoform 3 of	12329	NaN
410	B5MDF5;P62826;J3KQE5;F5H018;H0YFC6;B4DV51;A0A087X0W0	B5MDF5;P62826;J3KQE5;F5H018;H0YFC6	GTP-binding nuclear protein Ran	RAN	658390000	619970000	607640000	260130000	104130000	93909000	NaN	NaN	NaN	7	12	12	12	45.1	45.1	45.1	26.224	0	121.97	5798900000	458170000	10	49	18	16	15	3346800000	1348400000	1103800000	45.1	41.6	41.6	12	10	10	12	10	10	12	10	10	AAQGEPQVQFK;FNVWDTAGQEK;HLTGEFEK;KYVATLGVEVHPLVFHTNR;LVLVGDGGTGK;NLQYYDISAK;NVPNWHR;PFLWLAR;RHLTGEFEK;SNYNFEKPFLWLAR;VCENIPIVLCGNK;YVATLGVEVHPLVFHTNR	tr|B5MDF5|B5MDF5_HUMAN Isoform of P62826, GTP-binding nuclear protein Ran OS=Homo sapiens OX=9606 GN=RAN PE=1 SV=1;sp|P62826|RAN_HUMAN GTP-binding nuclear protein Ran OS=Homo sapiens OX=9606 GN=RAN PE=1 SV=3;tr|J3KQE5|J3KQE5_HUMAN Isoform of P62826, GTP-bi	153;4970;6796;8957;11168;12310;12623;12726;13547;14635;16421;18640	NaN;NaN;NaN;NaN;NaN;NaN;NaN;NaN;NaN;NaN;NaN;NaN
411	E7EW69;E7EX04;B5ME97;Q9P0V9-3;Q9P0V9;Q9P0V9-2;F5GYV2;C9JEW2;C9JNR7;F5H1F2	E7EW69;E7EX04;B5ME97;Q9P0V9-3;Q9P0V9;Q9P0V9-2	Septin-10	2010-09-01	37278000	44127000	45224000	3375300	1838900	1726100	NaN	NaN	NaN	10	8	8	6	27.1	27.1	19.6	52.145	0	29.841	223690000	6940300	22	14	5	6	3	115890000	69826000	37974000	17.3	20.7	6.4	5	6	3	5	6	3	4	5	3	AQTYELQESNVQLK;LLEEEIIAFSK;QYPWGVVQVENENHCDFVK;SLFTYHDSR;SLTMSGHVGFESLPDQLVNR;STLIDTLFNTNFEDYESSHFCPNVK;VNIIPVIAK	tr|E7EW69|E7EW69_HUMAN Isoform of Q9P0V9, Septin-10 OS=Homo sapiens OX=9606 GN=SEPT10 PE=1 SV=1;tr|E7EX04|E7EX04_HUMAN Isoform of Q9P0V9, Septin-10 OS=Homo sapiens OX=9606 GN=SEPT10 PE=1 SV=1;tr|B5ME97|B5ME97_HUMAN Isoform of Q9P0V9, Septin 10, isoform CRA	1322;10057;10981;13398;14425;14537;14884;17353	NaN;NaN;NaN;NaN;NaN;NaN;NaN;NaN
412	B7WPG3;C9IYN3;D6W592;Q8WVV9-5;Q8WVV9-4;Q8WVV9;H7C464;Q8WVV9-3;C9JJZ7	B7WPG3;C9IYN3;D6W592;Q8WVV9-5;Q8WVV9-4;Q8WVV9	Heterogeneous nuclear ribonucleoprotein L-like	HNRNPLL;HNRPLL	21570000	26660000	20474000	175590	54437	65459	NaN	NaN	NaN	9	7	6	3	19.5	18.1	9.6	56.45	0	15.943	71147000	295480	29	10	4	3	3	32428000	19169000	19550000	13	7.9	14.4	5	3	5	4	2	4	2	1	2	GLCESVVEADLVEALEK;LNVCVSK;QALVEFENIDSAK;QHSVVPSQIFELEDGTSSYK;SFSQPEAGGSHHK;TDAVEALTALNHYQIR;VFNLFCLYGNIEK	tr|B7WPG3|B7WPG3_HUMAN Isoform of Q8WVV9, Heterogeneous nuclear ribonucleoprotein L-like OS=Homo sapiens OX=9606 GN=HNRNPLL PE=1 SV=1;tr|C9IYN3|C9IYN3_HUMAN Isoform of Q8WVV9, Heterogeneous nuclear ribonucleoprotein L-like, isoform CRA_a OS=Homo sapiens OX	5904;10462;12848;13011;14099;15200;16734	NaN;NaN;NaN;NaN;NaN;NaN;NaN
413	O15198;P84022-3;H3BVD1;B7Z5N5;Q15796-2;Q15796;O15198-2;P84022;P84022-2;Q15797;Q99717;H0YNV1;K7EJX0;P84022-4;H0YAK7;H3BP09;H0YKE2;H0YL71;H0YMP2	O15198;P84022-3;H3BVD1;B7Z5N5;Q15796-2;Q15796;O15198-2;P84022;P84022-2;Q15797;Q99717;H0YNV1;K7EJX0;P84022-4;H0YAK7;H3BP09;H0YKE2;H0YL71;H0YMP2	Mothers against decapentaplegic homolog 9;Mothers against decapentaplegic homolog 3;Mothers against decapentaplegic homolog;Mothers against decapentaplegic homolog 2;Mothers against decapentaplegic homolog 1;Mothers against decapentaplegic homolog 5	SMAD9;SMAD3;SMAD2;SMAD1;SMAD5	NaN	24020000	20138000	430610	685660	540620	NaN	NaN	NaN	19	2	2	2	5.1	5.1	5.1	52.493	0	5.6567	41132000	1656900	24	6	1	3	2	10335000	17823000	12975000	2.8	5.1	5.1	1	2	2	1	2	2	1	2	2	FCLGLLSNVNR;VETPVLPPVLVPR	sp|O15198|SMAD9_HUMAN Mothers against decapentaplegic homolog 9 OS=Homo sapiens OX=9606 GN=SMAD9 PE=1 SV=1;sp|P84022-3|SMAD3_HUMAN Isoform of P84022, Isoform 3 of Mothers against decapentaplegic homolog 3 OS=Homo sapiens OX=9606 GN=SMAD3;tr|H3BVD1|H3BVD1_H	4475;16662	NaN;NaN
414	Q96GQ7;B7Z6D5;A0A087X059	Q96GQ7;B7Z6D5;A0A087X059	Probable ATP-dependent RNA helicase DDX27	DDX27	14406000	16019000	19672000	1589100	317680	709570	NaN	NaN	NaN	3	6	6	6	8.2	8.2	8.2	89.834	0	20.901	99421000	2616300	38	10	4	2	4	60385000	12072000	26964000	6.8	2.8	5.7	5	2	4	5	2	4	5	2	4	AAPDILIATPGR;ALQEFDLALR;EAIVAALLTR;IFVNSNTDVAPFLR;TAAFALPVLER;VLVLVPTR	sp|Q96GQ7|DDX27_HUMAN Probable ATP-dependent RNA helicase DDX27 OS=Homo sapiens OX=9606 GN=DDX27 PE=1 SV=2;tr|B7Z6D5|B7Z6D5_HUMAN Isoform of Q96GQ7, Probable ATP-dependent RNA helicase DDX27 OS=Homo sapiens OX=9606 GN=DDX27 PE=1 SV=1;tr|A0A087X059|A0A087X0	140;1016;3170;7390;15085;17279	NaN;NaN;NaN;NaN;NaN;NaN
415	B7Z7F3;Q9H6Z4-3;Q9H6Z4-2;Q9H6Z4;K7EMH9;K7ESQ0;K7EIJ4	B7Z7F3;Q9H6Z4-3;Q9H6Z4-2;Q9H6Z4;K7EMH9;K7ESQ0;K7EIJ4	Ran-binding protein 3	RANBP3	NaN	NaN	NaN	NaN	141670	208150	NaN	NaN	NaN	7	2	2	2	4.5	4.5	4.5	52.894	0.0011943	2.5936	7695900	349810	22	1	0	0	1	0	3116700	4579200	0	2.4	2	0	1	1	0	1	1	0	1	1	DTGQLYAALHHR;FVFGQNMSER	tr|B7Z7F3|B7Z7F3_HUMAN Isoform of Q9H6Z4, cDNA FLJ58549, highly similar to Ran-binding protein 3 OS=Homo sapiens OX=9606 GN=RANBP3 PE=1 SV=1;sp|Q9H6Z4-3|RANB3_HUMAN Isoform of Q9H6Z4, Isoform 3 of Ran-binding protein 3 OS=Homo sapiens OX=9606 GN=RANBP3;sp|	2909;5201	NaN;NaN
416	B7Z7P8;P62495-2;P62495;I3L492;D6RJE8;D6RCB3	B7Z7P8;P62495-2;P62495	Eukaryotic peptide chain release factor subunit 1	ETF1	72969000	70536000	73955000	9453200	4228000	4436600	NaN	NaN	NaN	6	10	10	10	28.8	28.8	28.8	47.475	0	37.387	514520000	18118000	24	25	9	8	8	256530000	137390000	120590000	24.8	22.5	18.9	8	8	7	8	8	7	8	8	7	FHTEALTALLSDDSK;FTVDLPK;ILYLTPEQEK;ILYLTPEQEKDK;LSVLGAITSVQQR;LVDISYGGENGFNQAIELSTEVLSNVK;TELSQSDMFDQR;VNVAGLVLAGSADFK;YCFGVEDTLK;YFDEISQDTGK	tr|B7Z7P8|B7Z7P8_HUMAN Isoform of P62495, Eukaryotic peptide chain release factor subunit 1 OS=Homo sapiens OX=9606 GN=ETF1 PE=1 SV=1;sp|P62495-2|ERF1_HUMAN Isoform of P62495, Isoform 2 of Eukaryotic peptide chain release factor subunit 1 OS=Homo sapiens O	4735;5177;7881;7882;10913;11094;15292;17394;18144;18246	NaN;NaN;NaN;NaN;NaN;NaN;NaN;NaN;NaN;NaN
417	F8VV59;B7Z9C2;F8W118;P55209-3;H0YHC3;F8VRJ2;H0YH88;B7Z4K9	F8VV59;B7Z9C2;F8W118;P55209-3;H0YHC3;F8VRJ2;H0YH88	Nucleosome assembly protein 1-like 1	NAP1L1	NaN	NaN	NaN	NaN	NaN	NaN	NaN	NaN	NaN	8	8	1	1	33.3	4.3	4.3	38.028	0.00041876	2.9528	0	0	11	1	0	0	1	0	0	0	29.1	20.8	25.1	6	6	7	0	0	1	0	0	1	FYEEVHDLER;GIPEFWLTVFK;LDGLVETPTGYIESLPR;MMQNPQILAALQER;NVDLLSDMVQEHDEPILK;SEPDDSDPFSFDGPEIMGCTGCQIDWK;YAVLYQPLFDK;YAVLYQPLFDKR	tr|F8VV59|F8VV59_HUMAN Isoform of P55209, Nucleosome assembly protein 1-like 1 OS=Homo sapiens OX=9606 GN=NAP1L1 PE=1 SV=1;tr|B7Z9C2|B7Z9C2_HUMAN Isoform of P55209, cDNA FLJ58569, highly similar to Nucleosome assembly protein 1-like 1 OS=Homo sapiens OX=96	5271;5841;9226;11669;12565;14032;18134;18135	NaN;NaN;NaN;NaN;NaN;NaN;NaN;NaN
418	B7Z9I1;Q5T4U5;P11310;P11310-2;E9PJM9;E9PRX4	B7Z9I1;Q5T4U5;P11310;P11310-2	Medium-chain specific acyl-CoA dehydrogenase, mitochondrial	ACADM	27898000	24803000	23351000	2608000	1859500	1453700	NaN	NaN	NaN	6	5	5	5	14.5	14.5	14.5	42.426	0	11.249	112500000	5921200	19	8	2	3	3	49552000	35330000	27621000	5.7	12.2	11.2	2	4	4	2	4	4	2	4	4	ANWYFLLAR;EEIIPVAAEYDK;ENVLIGDGAGFK;IYQIYEGTSQIQR;TGEYPVPLIR	tr|B7Z9I1|B7Z9I1_HUMAN Isoform of P11310, Medium-chain-specific acyl-CoA dehydrogenase, mitochondrial OS=Homo sapiens OX=9606 GN=ACADM PE=1 SV=1;tr|Q5T4U5|Q5T4U5_HUMAN Isoform of P11310, Acyl-Coenzyme A dehydrogenase, C-4 to C-12 straight chain, isoform CR	1170;3363;3987;8471;15418	NaN;NaN;NaN;NaN;NaN
419	B7ZAQ6-2;B7ZAQ6-3;P0CG08;B7ZAQ6	B7ZAQ6-2;B7ZAQ6-3;P0CG08;B7ZAQ6	Golgi pH regulator A;Golgi pH regulator B	GPR89A;GPR89B	NaN	NaN	NaN	80504	NaN	NaN	NaN	NaN	NaN	4	1	1	1	8.1	8.1	8.1	38.484	0.0067906	1.8406	1449100	80504	18	1	1	0	0	1449100	0	0	8.1	0	0	1	0	0	1	0	0	1	0	0	SVTTSASGSENLTLIQQEVDALEELSR	sp|B7ZAQ6-2|GPHRA_HUMAN Isoform of B7ZAQ6, Isoform 2 of Golgi pH regulator A OS=Homo sapiens OX=9606 GN=GPR89A;sp|B7ZAQ6-3|GPHRA_HUMAN Isoform of B7ZAQ6, Isoform 3 of Golgi pH regulator A OS=Homo sapiens OX=9606 GN=GPR89A;sp|P0CG08|GPHRB_HUMAN Golgi pH reg	15005	NaN
420	B7ZC39;B7ZC38;Q9NR46;Q9NR46-2;F8WFB9	B7ZC39;B7ZC38;Q9NR46;Q9NR46-2;F8WFB9	Endophilin-B2	SH3GLB2	NaN	18446000	17025000	755270	283240	468680	NaN	NaN	NaN	5	2	2	2	5.6	5.6	5.6	41.668	0.00048123	4.1926	41507000	751920	17	6	1	2	3	12840000	13379000	15288000	3.5	3.5	5.6	1	1	2	1	1	2	1	1	2	NFLEGDWK;TELDAHFENLLAR	tr|B7ZC39|B7ZC39_HUMAN Isoform of Q9NR46, Endophilin-B2 OS=Homo sapiens OX=9606 GN=SH3GLB2 PE=1 SV=1;tr|B7ZC38|B7ZC38_HUMAN Isoform of Q9NR46, Endophilin-B2 OS=Homo sapiens OX=9606 GN=SH3GLB2 PE=1 SV=1;sp|Q9NR46|SHLB2_HUMAN Endophilin-B2 OS=Homo sapiens OX	12040;15285	NaN;NaN
421	B7ZL14;H0Y7W6;Q96RU3-4;Q96RU3-3;Q96RU3-5;Q96RU3-2;Q96RU3	B7ZL14;H0Y7W6;Q96RU3-4;Q96RU3-3;Q96RU3-5;Q96RU3-2;Q96RU3	Formin-binding protein 1	FNBP1	NaN	NaN	NaN	207000	NaN	NaN	NaN	NaN	NaN	7	1	1	1	2	2	2	64.071	0.00082542	2.8365	5588900	207000	27	1	1	0	0	5588900	0	0	2	0	0	1	0	0	1	0	0	1	0	0	FEAWLAEVEGR	tr|B7ZL14|B7ZL14_HUMAN Isoform of Q96RU3, FNBP1 protein OS=Homo sapiens OX=9606 GN=FNBP1 PE=1 SV=1;tr|H0Y7W6|H0Y7W6_HUMAN Isoform of Q96RU3, Formin-binding protein 1 (Fragment) OS=Homo sapiens OX=9606 GN=FNBP1 PE=1 SV=2;sp|Q96RU3-4|FNBP1_HUMAN Isoform of Q	4537	NaN
422	B9A008;E7ENR5;B8ZZ47;H0Y714;Q96G21	B9A008;E7ENR5;B8ZZ47;H0Y714;Q96G21	U3 small nucleolar ribonucleoprotein protein IMP4	IMP4	NaN	NaN	NaN	788910	NaN	NaN	NaN	NaN	NaN	5	1	1	1	8.1	8.1	8.1	19.619	0.0015595	2.4676	7100200	788910	9	1	1	0	0	7100200	0	0	8.1	0	0	1	0	0	1	0	0	1	0	0	VITFANQDDYISFR	tr|B9A008|B9A008_HUMAN Isoform of Q96G21, U3 small nucleolar ribonucleoprotein protein IMP4 (Fragment) OS=Homo sapiens OX=9606 GN=IMP4 PE=1 SV=1;tr|E7ENR5|E7ENR5_HUMAN Isoform of Q96G21, U3 small nucleolar ribonucleoprotein protein IMP4 (Fragment) OS=Homo	16995	NaN
423	B8ZZ77;H7BZ14;Q9H2H8;Q9H2H8-2	B8ZZ77;H7BZ14;Q9H2H8;Q9H2H8-2	Peptidyl-prolyl cis-trans isomerase;Peptidyl-prolyl cis-trans isomerase-like 3	PPIL3	NaN	NaN	NaN	2005000	NaN	NaN	NaN	NaN	NaN	4	2	2	2	19.1	19.1	19.1	17.696	0	9.1949	24060000	2005000	12	2	1	0	1	24060000	0	0	12.1	0	7	1	0	1	1	0	1	1	0	1	DITIHANPFAQ;VIDGLETLDELEKLPVNEK	tr|B8ZZ77|B8ZZ77_HUMAN Isoform of Q9H2H8, Peptidyl-prolyl cis-trans isomerase OS=Homo sapiens OX=9606 GN=PPIL3 PE=1 SV=1;tr|H7BZ14|H7BZ14_HUMAN Isoform of Q9H2H8, Peptidyl-prolyl cis-trans isomerase (Fragment) OS=Homo sapiens OX=9606 GN=PPIL3 PE=1 SV=1;sp|	2444;16910	NaN;NaN
424	F8WBU9;C9JBZ7;C9J7J4;B8ZZD4;Q86VP1-2;Q86VP1	F8WBU9;C9JBZ7;C9J7J4;B8ZZD4;Q86VP1-2;Q86VP1	Tax1-binding protein 1	TAX1BP1	NaN	NaN	NaN	345060	NaN	NaN	NaN	NaN	NaN	6	1	1	1	25.3	25.3	25.3	10.577	0.0019194	2.3743	1725300	345060	5	1	1	0	0	1725300	0	0	25.3	0	0	1	0	0	1	0	0	1	0	0	TSFQEVPLQTSNFAHVIFQNVAK	tr|F8WBU9|F8WBU9_HUMAN Isoform of Q86VP1, Tax1-binding protein 1 OS=Homo sapiens OX=9606 GN=TAX1BP1 PE=1 SV=1;tr|C9JBZ7|C9JBZ7_HUMAN Isoform of Q86VP1, Tax1-binding protein 1 (Fragment) OS=Homo sapiens OX=9606 GN=TAX1BP1 PE=1 SV=1;tr|C9J7J4|C9J7J4_HUMAN Is	15978	NaN
425	C9J128;C9J2Z6;C9J173;B8ZZF6;E7ET59;E7EUX4;E7ENF2;P49441	C9J128;C9J2Z6;C9J173;B8ZZF6;E7ET59;E7EUX4;E7ENF2;P49441	Inositol polyphosphate 1-phosphatase	INPP1	NaN	NaN	NaN	1047600	466290	NaN	NaN	NaN	NaN	8	1	1	1	17.6	17.6	17.6	7.8381	0.0022693	2.2898	4541800	1513900	3	1	1	0	0	3142900	1398900	0	17.6	17.6	0	1	1	0	1	1	0	1	1	0	TLADVLVQEVIK	tr|C9J128|C9J128_HUMAN Isoform of P49441, Inositol polyphosphate 1-phosphatase (Fragment) OS=Homo sapiens OX=9606 GN=INPP1 PE=1 SV=1;tr|C9J2Z6|C9J2Z6_HUMAN Isoform of P49441, Inositol polyphosphate 1-phosphatase (Fragment) OS=Homo sapiens OX=9606 GN=INPP1	15625	NaN
426	B8ZZF8;Q9Y4Y9	B8ZZF8;Q9Y4Y9	U6 snRNA-associated Sm-like protein LSm5	LSM5	NaN	NaN	NaN	7909300	3348600	1590300	NaN	NaN	NaN	2	1	1	1	29.7	29.7	29.7	7.0202	0.00046926	3.9272	45631000	12848000	2	5	2	1	2	35753000	6697200	3180600	29.7	29.7	29.7	1	1	1	1	1	1	1	1	1	AANATTNPSQLLPLELVDK	tr|B8ZZF8|B8ZZF8_HUMAN Isoform of Q9Y4Y9, U6 snRNA-associated Sm-like protein LSm5 OS=Homo sapiens OX=9606 GN=LSM5 PE=1 SV=1;sp|Q9Y4Y9|LSM5_HUMAN U6 snRNA-associated Sm-like protein LSm5 OS=Homo sapiens OX=9606 GN=LSM5 PE=1 SV=3	133	NaN
427	B8ZZL3;O60573	B8ZZL3;O60573	Eukaryotic translation initiation factor 4E type 2	EIF4E2	NaN	NaN	NaN	NaN	323200	312250	NaN	NaN	NaN	2	1	1	1	5	5	5	23.248	0.00043029	3.1762	6354500	635450	10	3	1	1	1	0	3232000	3122500	5	5	5	1	1	1	1	1	1	1	1	1	LLFQNLWKPR	tr|B8ZZL3|B8ZZL3_HUMAN Isoform of O60573, Eukaryotic translation initiation factor 4E type 2 OS=Homo sapiens OX=9606 GN=EIF4E2 PE=1 SV=1;sp|O60573|IF4E2_HUMAN Eukaryotic translation initiation factor 4E type 2 OS=Homo sapiens OX=9606 GN=EIF4E2 PE=1 SV=1	10112	NaN
428	B8ZZN6;P63165;B8ZZJ0;B9A032;B8ZZ67;P63165-2	B8ZZN6;P63165;B8ZZJ0;B9A032	Small ubiquitin-related modifier 1	SUMO1	NaN	NaN	NaN	4307400	1464000	NaN	NaN	NaN	NaN	6	3	3	3	23.3	23.3	23.3	16.645	0	5.8988	68525000	5771400	9	4	3	1	0	55349000	13176000	0	23.3	8.2	0	3	1	0	3	1	0	3	1	0	FLFEGQR;SDQEAKPSTEDLGDK;VIGQDSSEIHFK	tr|B8ZZN6|B8ZZN6_HUMAN Isoform of P63165, Small ubiquitin-related modifier 1 OS=Homo sapiens OX=9606 GN=SUMO1 PE=1 SV=1;sp|P63165|SUMO1_HUMAN Small ubiquitin-related modifier 1 OS=Homo sapiens OX=9606 GN=SUMO1 PE=1 SV=1;tr|B8ZZJ0|B8ZZJ0_HUMAN Isoform of P6	4840;13946;16939	NaN;NaN;NaN
429	B8ZZQ6;P06454-2;P06454;B8ZZA1;B8ZZW7;H7C2N1	B8ZZQ6;P06454-2;P06454;B8ZZA1;B8ZZW7;H7C2N1	Prothymosin alpha;Prothymosin alpha, N-terminally processed;Thymosin alpha-1	PTMA	368540000	415890000	321870000	140900000	87993000	62610000	NaN	NaN	NaN	6	5	5	5	37.4	37.4	37.4	11.758	0	43.471	892110000	291510000	3	20	7	6	7	438340000	263980000	189790000	37.4	37.4	37.4	4	4	5	4	4	5	4	4	5	EVVEEAENGR;KEVVEEAENGR;RAAEDDEDDDVDTK;RAAEDDEDDDVDTKK;SDAAVDTSSEITTK	tr|B8ZZQ6|B8ZZQ6_HUMAN Isoform of P06454, Prothymosin alpha OS=Homo sapiens OX=9606 GN=PTMA PE=1 SV=1;sp|P06454-2|PTMA_HUMAN Isoform of P06454, Isoform 2 of Prothymosin alpha OS=Homo sapiens OX=9606 GN=PTMA;sp|P06454|PTMA_HUMAN Prothymosin alpha OS=Homo sa	4324;8627;13406;13407;13900	NaN;NaN;NaN;NaN;NaN
430	B8ZZS4;Q9H8Y5	B8ZZS4;Q9H8Y5	Ankyrin repeat and zinc finger domain-containing protein 1	ANKZF1	NaN	NaN	NaN	95111	NaN	NaN	NaN	NaN	NaN	2	1	1	1	4.8	4.8	4.8	57.572	0	4.2493	2472900	95111	26	1	1	0	0	2472900	0	0	4.8	0	0	1	0	0	1	0	0	1	0	0	VLSLLSAPLGSGGFTLLHAAAAAGR	tr|B8ZZS4|B8ZZS4_HUMAN Isoform of Q9H8Y5, Ankyrin repeat and zinc finger domain-containing protein 1 OS=Homo sapiens OX=9606 GN=ANKZF1 PE=1 SV=1;sp|Q9H8Y5|ANKZ1_HUMAN Ankyrin repeat and zinc finger domain-containing protein 1 OS=Homo sapiens OX=9606 GN=ANK	17237	NaN
431	B9A067;Q16891-3;Q16891-2;Q16891-4;Q16891;H7C463;C9J406;A0A087WYS0;D6RAW4	B9A067;Q16891-3;Q16891-2;Q16891-4;Q16891;H7C463;C9J406	MICOS complex subunit MIC60	IMMT	41778000	44578000	41829000	3037600	1633300	1928500	NaN	NaN	NaN	9	14	14	14	27	27	27	78.973	0	48.727	501030000	6599400	43	38	11	11	16	241260000	119600000	140170000	20.4	20.1	24.3	10	10	12	10	10	12	10	10	12	AHQLWLSVEALK;AVDEAADALLK;ELDSITPEVLPGWK;GVYSEETLR;LFEMVLGPAAYNVPLPK;LHNMIVDLDNVVK;LSEQELQFR;LSTDDLNSLIAHAHR;QAAAHTDHLR;QHITLALEK;QTASVTLQAIAAQNAAVQAVNAHSNILK;TSSAETPTIPLGSAVEAIK;VVSQYHELVVQAR;YSTSGSSGLTTGK	tr|B9A067|B9A067_HUMAN Isoform of Q16891, MICOS complex subunit MIC60 OS=Homo sapiens OX=9606 GN=IMMT PE=1 SV=2;sp|Q16891-3|MIC60_HUMAN Isoform of Q16891, Isoform 3 of MICOS complex subunit MIC60 OS=Homo sapiens OX=9606 GN=IMMT;sp|Q16891-2|MIC60_HUMAN Isof	676;1560;3739;6477;9496;9803;10817;10905;12813;13008;13292;16014;17882;18600	NaN;NaN;NaN;NaN;NaN;NaN;NaN;NaN;NaN;NaN;NaN;NaN;NaN;NaN
432	B9DI82;O75038-3;O75038;O75038-2;O75038-4	B9DI82;O75038-3;O75038;O75038-2;O75038-4	Phosphoinositide phospholipase C;1-phosphatidylinositol 4,5-bisphosphate phosphodiesterase eta-2	PLCH2	NaN	NaN	NaN	NaN	83593	NaN	NaN	NaN	NaN	5	2	2	2	1.6	1.6	1.6	134.78	0.0068076	1.8586	5015600	83593	60	1	1	0	0	0	5015600	0	0.8	0.8	0	1	1	0	1	1	0	1	1	0	ALSDLVKYTK;TLGHLPVIRR	tr|B9DI82|B9DI82_HUMAN Isoform of O75038, Phosphoinositide phospholipase C (Fragment) OS=Homo sapiens OX=9606 GN=PLCH2 PE=1 SV=2;sp|O75038-3|PLCH2_HUMAN Isoform of O75038, Isoform 3 of 1-phosphatidylinositol 4,5-bisphosphate phosphodiesterase eta-2 OS=Homo	1032;15678	NaN;NaN
433	B9ZVT1;Q8IXT5;E5RJW8;E5RHG1;E5RJ83;E5RJV8	B9ZVT1;Q8IXT5;E5RJW8;E5RHG1;E5RJ83;E5RJV8	RNA-binding protein 12B	RBM12B	NaN	NaN	NaN	85617	57614	64514	NaN	NaN	NaN	6	2	2	2	2.6	2.6	2.6	102.7	0.00042355	3.0417	11634000	207740	56	0	0	0	0	4794500	3226400	3612800	1	1	2.6	1	1	2	1	1	2	1	1	2	FLGTEVLLR;LLGLPFIAGPVDIR	tr|B9ZVT1|B9ZVT1_HUMAN Isoform of Q8IXT5, RNA-binding protein 12B OS=Homo sapiens OX=9606 GN=RBM12B PE=1 SV=2;sp|Q8IXT5|RB12B_HUMAN RNA-binding protein 12B OS=Homo sapiens OX=9606 GN=RBM12B PE=1 SV=2;tr|E5RJW8|E5RJW8_HUMAN Isoform of Q8IXT5, RNA-binding pr	4844;10128	NaN;NaN
434	C9IYT0;O60832-2;O60832;H7C0M1;H7BZF2;H7C2Q9	C9IYT0;O60832-2;O60832;H7C0M1	H/ACA ribonucleoprotein complex subunit 4	DKC1	NaN	NaN	NaN	316520	190470	160560	NaN	NaN	NaN	6	3	3	3	20.5	20.5	20.5	29.722	0	5.3912	42948000	667550	17	4	1	1	2	19427000	10781000	12740000	11.6	12.8	20.5	2	2	3	2	2	3	2	2	3	ADAEVIILPK;ALETLTGALFQRPPLIAAVK;SLPEEDVAEIQHAEEFLIKPESK	tr|C9IYT0|C9IYT0_HUMAN Isoform of O60832, H/ACA ribonucleoprotein complex subunit DKC1 (Fragment) OS=Homo sapiens OX=9606 GN=DKC1 PE=1 SV=8;sp|O60832-2|DKC1_HUMAN Isoform of O60832, Isoform 3 of H/ACA ribonucleoprotein complex subunit DKC1 OS=Homo sapiens	240;905;14506	NaN;NaN;NaN
435	C9IZF0;C9J5T2;Q8N0Z3	C9IZF0;C9J5T2;Q8N0Z3	Spindle and centriole-associated protein 1	SPICE1	NaN	NaN	NaN	936170	NaN	NaN	NaN	NaN	NaN	3	1	1	1	9.4	9.4	9.4	18.671	0.0015402	2.3998	5617000	936170	6	1	1	0	0	5617000	0	0	9.4	0	0	1	0	0	1	0	0	1	0	0	EILSDQYQMQDVLEK	tr|C9IZF0|C9IZF0_HUMAN Isoform of Q8N0Z3, Spindle and centriole-associated protein 1 (Fragment) OS=Homo sapiens OX=9606 GN=SPICE1 PE=1 SV=1;tr|C9J5T2|C9J5T2_HUMAN Isoform of Q8N0Z3, Spindle and centriole-associated protein 1 (Fragment) OS=Homo sapiens OX=9	3649	NaN
436	C9J3L8;C9J5W0;E9PAL7;C9IZQ1;P43307;P43307-2	C9J3L8;C9J5W0;E9PAL7;C9IZQ1;P43307;P43307-2	Translocon-associated protein subunit alpha	SSR1	NaN	57119000	65880000	7524800	4635200	4737100	NaN	NaN	NaN	6	3	3	3	12.8	12.8	12.8	29.573	0	6.3984	185870000	16897000	11	5	1	2	2	82773000	50988000	52108000	8.7	12.8	12.8	2	3	3	2	3	3	2	3	3	FLVGFTNK;GEDFPANNIVK;GTEDFIVESLDASFR	tr|C9J3L8|C9J3L8_HUMAN Isoform of P43307, Translocon-associated protein subunit alpha OS=Homo sapiens OX=9606 GN=SSR1 PE=1 SV=1;tr|C9J5W0|C9J5W0_HUMAN Isoform of P43307, Translocon-associated protein subunit alpha OS=Homo sapiens OX=9606 GN=SSR1 PE=1 SV=1;	4911;5492;6344	NaN;NaN;NaN
437	C9IZY8;F8W1F5;Q8IVF7-2;Q8IVF7-3;Q8IVF7;Q96PY5;Q96PY5-3	C9IZY8;F8W1F5;Q8IVF7-2;Q8IVF7-3;Q8IVF7;Q96PY5;Q96PY5-3	Formin-like protein 3;Formin-like protein 2	FMNL2;FMNL3	NaN	NaN	NaN	NaN	NaN	31776	NaN	NaN	NaN	7	1	1	1	2.8	2.8	2.8	53.383	0.0026257	2.2425	953280	31776	30	1	0	0	1	0	0	953280	0	0	2.8	0	0	1	0	0	1	0	0	1	TTPPSVFFPVFVR	tr|C9IZY8|C9IZY8_HUMAN Isoform of Q96PY5, Formin-like protein 2 OS=Homo sapiens OX=9606 GN=FMNL2 PE=1 SV=1;tr|F8W1F5|F8W1F5_HUMAN Isoform of Q8IVF7, Formin-like protein 3 OS=Homo sapiens OX=9606 GN=FMNL3 PE=1 SV=1;sp|Q8IVF7-2|FMNL3_HUMAN Isoform of Q8IVF7,	16064	NaN
438	H7BZN1;H7C1T3;C9J050;C9JEJ2;P49585;C9J2E1;Q9Y5K3-2;Q9Y5K3-4;Q9Y5K3-3;Q9Y5K3	H7BZN1;H7C1T3;C9J050;C9JEJ2;P49585;C9J2E1;Q9Y5K3-2;Q9Y5K3-4;Q9Y5K3-3;Q9Y5K3	Choline-phosphate cytidylyltransferase A;Choline-phosphate cytidylyltransferase B	PCYT1A;PCYT1B	NaN	NaN	NaN	NaN	504830	987410	NaN	NaN	NaN	10	2	2	2	19.7	19.7	19.7	15.769	0	4.4627	24825000	504830	9	3	0	1	2	0	15938000	8886700	0	19.7	19.7	0	2	2	0	2	2	0	2	2	NAPWTLTPEFLAEHR;TEGISTSDIITR	tr|H7BZN1|H7BZN1_HUMAN Isoform of P49585, Choline-phosphate cytidylyltransferase A (Fragment) OS=Homo sapiens OX=9606 GN=PCYT1A PE=1 SV=1;tr|H7C1T3|H7C1T3_HUMAN Isoform of P49585, Choline-phosphate cytidylyltransferase A (Fragment) OS=Homo sapiens OX=9606	11884;15279	NaN;NaN
439	C9JRU6;C9J0B2;C9JUW4;C9J8R4;C9JVE2;Q96GG9	C9JRU6;C9J0B2;C9JUW4;C9J8R4;C9JVE2;Q96GG9	DCN1-like protein;DCN1-like protein 1	DCUN1D1	NaN	NaN	NaN	1788000	NaN	307010	NaN	NaN	NaN	6	1	1	1	22.7	22.7	22.7	8.7797	0	24.525	12570000	2095000	6	2	1	0	1	10728000	0	1842000	22.7	0	22.7	1	0	1	1	0	1	1	0	1	LDVATDNFFQNPELYIR	tr|C9JRU6|C9JRU6_HUMAN Isoform of Q96GG9, DCN1-like protein (Fragment) OS=Homo sapiens OX=9606 GN=DCUN1D1 PE=1 SV=1;tr|C9J0B2|C9J0B2_HUMAN Isoform of Q96GG9, DCN1-like protein (Fragment) OS=Homo sapiens OX=9606 GN=DCUN1D1 PE=1 SV=1;tr|C9JUW4|C9JUW4_HUMAN I	9293	NaN
440	C9J0I9;Q86WB0-3;Q86WB0-2;Q86WB0	C9J0I9;Q86WB0-3;Q86WB0-2;Q86WB0	Nuclear-interacting partner of ALK	ZC3HC1	NaN	NaN	NaN	116800	NaN	NaN	NaN	NaN	NaN	4	1	1	1	3.3	3.3	3.3	50.562	0.0011995	2.6154	3270400	116800	28	1	1	0	0	3270400	0	0	3.3	0	0	1	0	0	1	0	0	1	0	0	ISLLLHLLEDELDHR	tr|C9J0I9|C9J0I9_HUMAN Isoform of Q86WB0, Nuclear-interacting partner of ALK OS=Homo sapiens OX=9606 GN=ZC3HC1 PE=1 SV=1;sp|Q86WB0-3|NIPA_HUMAN Isoform of Q86WB0, Isoform 3 of Nuclear-interacting partner of ALK OS=Homo sapiens OX=9606 GN=ZC3HC1;sp|Q86WB0-2	8156	NaN
441	C9J0J7;G5E9Q6;P35080-2;C9JQ45;C9J2N0	C9J0J7;G5E9Q6;P35080-2;C9JQ45;C9J2N0	Profilin;Profilin-2	PFN2	90758000	103240000	89094000	39652000	20820000	18355000	NaN	NaN	NaN	5	5	5	1	56	56	8.8	9.8402	0	22.202	716420000	78827000	6	26	8	9	9	370490000	184840000	161090000	56	56	56	4	4	5	4	4	5	1	1	1	ALVIVMGK;DREGFFTNGLTLGAK;DSLYVDGDCTMDIR;EGFFTNGLTLGAK;SQGGEPTYNVAVGR	tr|C9J0J7|C9J0J7_HUMAN Isoform of P35080, Profilin OS=Homo sapiens OX=9606 GN=PFN2 PE=1 SV=1;tr|G5E9Q6|G5E9Q6_HUMAN Isoform of P35080, Profilin OS=Homo sapiens OX=9606 GN=PFN2 PE=1 SV=1;sp|P35080-2|PROF2_HUMAN Isoform of P35080, Isoform IIb of Profilin-2 O	1079;2828;2873;3503;14718	NaN;NaN;NaN;NaN;NaN
442	C9J0K6;P30626-3;P30626-2;P30626;B4DHQ6	C9J0K6;P30626-3;P30626-2;P30626	Sorcin	SRI	53643000	71366000	55431000	10131000	5979600	5075800	NaN	NaN	NaN	5	5	5	5	31.6	31.6	31.6	17.605	0	12.225	275420000	21186000	13	13	4	4	5	131700000	77734000	65986000	27.1	24.5	31.6	4	4	5	4	4	5	4	4	5	ALTDSFR;ALTTMGFR;ITFDDYIACCVK;LSPQAVNSIAK;SGTVDPQELQK	tr|C9J0K6|C9J0K6_HUMAN Isoform of P30626, Sorcin OS=Homo sapiens OX=9606 GN=SRI PE=1 SV=1;sp|P30626-3|SORCN_HUMAN Isoform of P30626, Isoform 3 of Sorcin OS=Homo sapiens OX=9606 GN=SRI;sp|P30626-2|SORCN_HUMAN Isoform of P30626, Isoform 2 of Sorcin OS=Homo s	1048;1059;8247;10876;14189	NaN;NaN;NaN;NaN;NaN
443	C9J164;C9K0J5;Q70E73-5;Q70E73-2;Q70E73-8;Q70E73-7;Q70E73-4;Q70E73-3;Q70E73-9;Q70E73-6;Q70E73	C9J164;C9K0J5;Q70E73-5;Q70E73-2;Q70E73-8;Q70E73-7;Q70E73-4;Q70E73-3;Q70E73-9;Q70E73-6;Q70E73	Ras-associated and pleckstrin homology domains-containing protein 1	RAPH1	NaN	NaN	NaN	86834	NaN	NaN	NaN	NaN	NaN	11	1	1	1	2.9	2.9	2.9	67.176	0.0047689	2.0483	2170800	86834	25	1	1	0	0	2170800	0	0	2.9	0	0	1	0	0	1	0	0	1	0	0	IFEDHENLVENLLNWTR	tr|C9J164|C9J164_HUMAN Isoform of Q70E73, Ras-associated and pleckstrin homology domains-containing protein 1 OS=Homo sapiens OX=9606 GN=RAPH1 PE=1 SV=1;tr|C9K0J5|C9K0J5_HUMAN Isoform of Q70E73, Ras association (RalGDS/AF-6) and pleckstrin homology domains	7330	NaN
444	C9J1E5;Q92783-2;Q92783	C9J1E5;Q92783-2;Q92783	Signal transducing adapter molecule 1	STAM	NaN	NaN	NaN	8551200	4719400	5206500	NaN	NaN	NaN	3	1	1	1	33.3	33.3	33.3	4.6451	0	12.701	36954000	18477000	2	3	1	1	1	17102000	9438800	10413000	33.3	33.3	33.3	1	1	1	1	1	1	1	1	1	PLFATNPFDQDVEK	tr|C9J1E5|C9J1E5_HUMAN Isoform of Q92783, Signal transducing adapter molecule 1 OS=Homo sapiens OX=9606 GN=STAM PE=1 SV=2;sp|Q92783-2|STAM1_HUMAN Isoform of Q92783, Isoform 2 of Signal transducing adapter molecule 1 OS=Homo sapiens OX=9606 GN=STAM;sp|Q9278	12757	NaN
445	D6RBD7;C9J1V9;O43324-2;O43324;H0YAL7;D6RCQ0	D6RBD7;C9J1V9;O43324-2;O43324;H0YAL7;D6RCQ0	Eukaryotic translation elongation factor 1 epsilon-1	EEF1E1;EEF1E1-BLOC1S5	77306000	99980000	NaN	14597000	7702000	603740	NaN	NaN	NaN	6	4	4	4	38	38	38	16.686	0	14.179	260170000	22299000	10	13	5	5	3	170350000	83782000	6037400	38	30.7	24	4	3	2	4	3	2	4	3	2	AAAAELSLLEK;AIVQQWLEYR;EYLLGSTAEEK;QIPVLQTNNGPSLTGLTTIAAHLVK	tr|D6RBD7|D6RBD7_HUMAN Isoform of O43324, Eukaryotic translation elongation factor 1 epsilon-1 OS=Homo sapiens OX=9606 GN=EEF1E1 PE=4 SV=1;tr|C9J1V9|C9J1V9_HUMAN EEF1E1-BLOC1S5 readthrough (NMD candidate) OS=Homo sapiens OX=9606 GN=EEF1E1-BLOC1S5 PE=4 SV=2	11;802;4368;13059	NaN;NaN;NaN;NaN
446	H7C5M9;C9JSA3;C9JND6;C9J363;C9J6F3;C9J5C3;Q9BUL8	H7C5M9;C9JSA3;C9JND6;C9J363;C9J6F3;C9J5C3;Q9BUL8	Programmed cell death protein 10	PDCD10	NaN	NaN	NaN	NaN	1169000	1294300	NaN	NaN	NaN	7	1	1	1	9.8	9.8	9.8	14.117	0.0022936	2.3384	14780000	2463300	6	2	0	1	1	0	7014000	7765800	0	9.8	9.8	0	1	1	0	1	1	0	1	1	SVEVNFTESLLR	tr|H7C5M9|H7C5M9_HUMAN Isoform of Q9BUL8, Programmed cell death protein 10 (Fragment) OS=Homo sapiens OX=9606 GN=PDCD10 PE=1 SV=1;tr|C9JSA3|C9JSA3_HUMAN Isoform of Q9BUL8, Programmed cell death protein 10 (Fragment) OS=Homo sapiens OX=9606 GN=PDCD10 PE=1 S	14942	NaN
447	C9J381;P20839-2;P20839-4;P20839;P20839-3;P20839-7;P20839-5;P20839-6;C9K0R9	C9J381;P20839-2;P20839-4;P20839;P20839-3;P20839-7;P20839-5;P20839-6;C9K0R9	Inosine-5-monophosphate dehydrogenase;Inosine-5-monophosphate dehydrogenase 1	IMPDH1	NaN	NaN	NaN	1066000	NaN	33289	NaN	NaN	NaN	9	4	3	3	10.5	9	9	55.277	0	8.3567	26124000	1099200	21	3	2	0	1	22385000	0	3738600	5.3	1.6	8.4	2	1	3	2	0	2	2	0	2	EANEILQR;FVPYLIAGIQHGCQDIGAR;LPIVNDCDELVAIIAR;NLIDAGVDGLR	tr|C9J381|C9J381_HUMAN Isoform of P20839, Inosine-5-monophosphate dehydrogenase OS=Homo sapiens OX=9606 GN=IMPDH1 PE=1 SV=1;sp|P20839-2|IMDH1_HUMAN Isoform of P20839, Isoform 2 of Inosine-5-monophosphate dehydrogenase 1 OS=Homo sapiens OX=9606 GN=IMPDH1;	3197;5239;10523;12258	NaN;NaN;NaN;NaN
448	M0R0A1;C9J4Z3;Q6P4E4;E9PEL3;M0R2L6;P61513;G5E9R3;A6NKH3	M0R0A1;C9J4Z3;Q6P4E4;E9PEL3;M0R2L6;P61513;G5E9R3	60S ribosomal protein L37a	RPL37A	NaN	NaN	NaN	18717000	1588600	4737000	NaN	NaN	NaN	8	4	4	4	48.3	48.3	48.3	6.793	0	11.936	133830000	25043000	5	6	3	1	2	93587000	7943100	32300000	46.7	15	48.3	3	1	3	3	1	3	3	1	3	AVGIWHCGSCMK;IEISQHAK;KIEISQHAK;YTCSFCGK	tr|M0R0A1|M0R0A1_HUMAN Isoform of P61513, 60S ribosomal protein L37a OS=Homo sapiens OX=9606 GN=RPL37A PE=1 SV=1;tr|C9J4Z3|C9J4Z3_HUMAN Isoform of P61513, 60S ribosomal protein L37a OS=Homo sapiens OX=9606 GN=RPL37A PE=1 SV=1;tr|Q6P4E4|Q6P4E4_HUMAN Isoform	1596;7268;8725;18613	NaN;NaN;NaN;NaN
449	C9J5D1;E7EQ69;Q9GZZ1;C9JZU6;A0A087WWJ2;B0AZT5;Q9GZZ1-2;F8WCK0;C9J5J3;A0A0D9SF32	C9J5D1;E7EQ69;Q9GZZ1;C9JZU6;A0A087WWJ2;B0AZT5;Q9GZZ1-2	N-alpha-acetyltransferase 50	NAA50	29797000	NaN	33822000	6565300	1347100	3904600	NaN	NaN	NaN	10	4	4	4	32.6	32.6	32.6	14.886	0	7.8572	101630000	11817000	8	7	2	1	4	52522000	10777000	38334000	14.7	7	32.6	2	1	4	2	1	4	2	1	4	DVLEVGELAK;FGFEIIETK;IELGDVTPHNIK;MLNHVLNICEK	tr|C9J5D1|C9J5D1_HUMAN Isoform of Q9GZZ1, N-alpha-acetyltransferase 50 OS=Homo sapiens OX=9606 GN=NAA50 PE=1 SV=1;tr|E7EQ69|E7EQ69_HUMAN Isoform of Q9GZZ1, N-alpha-acetyltransferase 50 OS=Homo sapiens OX=9606 GN=NAA50 PE=1 SV=1;sp|Q9GZZ1|NAA50_HUMAN N-alph	2983;4648;7272;11628	NaN;NaN;NaN;NaN
450	C9JJV6;C9JZL8;C9J5M0;C9JC07;Q96S97	C9JJV6;C9JZL8;C9J5M0;C9JC07;Q96S97	Myeloid-associated differentiation marker	MYADM	NaN	NaN	NaN	4396300	2368100	2508900	NaN	NaN	NaN	5	1	1	1	6.8	6.8	6.8	15.864	0.00043592	3.2744	37093000	9273300	4	2	0	1	1	17585000	9472300	10036000	6.8	6.8	6.8	1	1	1	1	1	1	1	1	1	ALTQPLGLLR	tr|C9JJV6|C9JJV6_HUMAN Isoform of Q96S97, Myeloid-associated differentiation marker (Fragment) OS=Homo sapiens OX=9606 GN=MYADM PE=1 SV=8;tr|C9JZL8|C9JZL8_HUMAN Isoform of Q96S97, Myeloid-associated differentiation marker (Fragment) OS=Homo sapiens OX=9606	1054	NaN
451	C9J5N1;Q9BTE6;Q9BTE6-2;Q9BTE6-3	C9J5N1;Q9BTE6;Q9BTE6-2;Q9BTE6-3	Alanyl-tRNA editing protein Aarsd1	PTGES3L-AARSD1;AARSD1	NaN	NaN	NaN	233380	86284	58691	NaN	NaN	NaN	4	1	1	1	4	4	4	55.065	0.0054725	2.0064	11468000	378350	23	4	2	1	1	8133900	1984500	1349900	4	4	4	1	1	1	1	1	1	1	1	1	GGGLFLLAGPPASVETLGPR	tr|C9J5N1|C9J5N1_HUMAN Isoform of Q9BTE6, PTGES3L-AARSD1 readthrough OS=Homo sapiens OX=9606 GN=PTGES3L-AARSD1 PE=1 SV=1;sp|Q9BTE6|AASD1_HUMAN Alanyl-tRNA editing protein Aarsd1 OS=Homo sapiens OX=9606 GN=AARSD1 PE=1 SV=2;sp|Q9BTE6-2|AASD1_HUMAN Isoform of	5693	NaN
452	C9J647;F8WF03;F2Z2I0;F2Z2W5;H7BXF4;Q9NXE4-3;Q9NXE4-2;Q9NXE4;Q9NXE4-4	C9J647;F8WF03;F2Z2I0;F2Z2W5;H7BXF4;Q9NXE4-3;Q9NXE4-2;Q9NXE4;Q9NXE4-4	Sphingomyelin phosphodiesterase 4	SMPD4	NaN	NaN	NaN	522810	91197	478800	NaN	NaN	NaN	9	2	2	2	21.5	21.5	21.5	15.271	0	7.1189	8742500	1092800	8	4	1	1	2	4182500	729580	3830400	11.9	11.9	21.5	1	1	2	1	1	2	1	1	2	AFPHLQQPSFLLASLK;FDFPVSYLPGPVK	tr|C9J647|C9J647_HUMAN Isoform of Q9NXE4, Sphingomyelin phosphodiesterase 4 (Fragment) OS=Homo sapiens OX=9606 GN=SMPD4 PE=1 SV=1;tr|F8WF03|F8WF03_HUMAN Isoform of Q9NXE4, Sphingomyelin phosphodiesterase 4 OS=Homo sapiens OX=9606 GN=SMPD4 PE=1 SV=1;tr|F2Z2	513;4497	NaN;NaN
453	C9J6A7;Q96AT9-5;Q96AT9-3;Q96AT9-4;Q96AT9-2;Q96AT9;Q2QD12	C9J6A7;Q96AT9-5;Q96AT9-3;Q96AT9-4;Q96AT9-2;Q96AT9;Q2QD12	Ribulose-phosphate 3-epimerase;Ribulose-phosphate 3-epimerase-like protein 1	RPE;RPEL1	NaN	NaN	NaN	1287900	NaN	525710	NaN	NaN	NaN	7	1	1	1	4.4	4.4	4.4	17.414	0.0065217	1.9292	12695000	1813600	7	2	1	0	1	9015500	0	3680000	4.4	0	4.4	1	0	1	1	0	1	1	0	1	SVINLLR	tr|C9J6A7|C9J6A7_HUMAN Isoform of Q96AT9, Ribulose-phosphate 3-epimerase (Fragment) OS=Homo sapiens OX=9606 GN=RPE PE=1 SV=1;sp|Q96AT9-5|RPE_HUMAN Isoform of Q96AT9, Isoform 5 of Ribulose-phosphate 3-epimerase OS=Homo sapiens OX=9606 GN=RPE;sp|Q96AT9-3|RPE	14965	NaN
454	C9J808;C9J6C5;Q9BYG3	C9J808;C9J6C5;Q9BYG3	MKI67 FHA domain-interacting nucleolar phosphoprotein	NIFK	NaN	NaN	NaN	NaN	NaN	270450	NaN	NaN	NaN	3	2	2	2	8.5	8.5	8.5	19.363	0.0064772	1.8803	6530400	270450	9	1	0	0	1	0	0	6530400	0	0	8.5	0	0	2	0	0	2	0	0	2	GIDYDFPSLILQK;KGIDYDFPSLILQK	tr|C9J808|C9J808_HUMAN Isoform of Q9BYG3, MKI67 FHA domain-interacting nucleolar phosphoprotein (Fragment) OS=Homo sapiens OX=9606 GN=NIFK PE=1 SV=8;tr|C9J6C5|C9J6C5_HUMAN Isoform of Q9BYG3, MKI67 FHA domain-interacting nucleolar phosphoprotein (Fragment)	5791;8674	NaN;NaN
455	C9J6P4;Q7Z2W4-3;Q7Z2W4-2;Q7Z2W4	C9J6P4;Q7Z2W4-3;Q7Z2W4-2;Q7Z2W4	Zinc finger CCCH-type antiviral protein 1	ZC3HAV1	NaN	NaN	NaN	219880	29818	33209	NaN	NaN	NaN	4	2	2	2	2.9	2.9	2.9	114.08	0	4.5921	17540000	282910	62	3	1	1	1	13633000	1848700	2058900	1.5	1.5	1.5	1	1	1	1	1	1	1	1	1	ATDLGGTSQAGTSQR;SSLGSLQTPEAVTTR	tr|C9J6P4|C9J6P4_HUMAN Isoform of Q7Z2W4, Zinc finger CCCH-type antiviral protein 1 OS=Homo sapiens OX=9606 GN=ZC3HAV1 PE=1 SV=1;sp|Q7Z2W4-3|ZCCHV_HUMAN Isoform of Q7Z2W4, Isoform 3 of Zinc finger CCCH-type antiviral protein 1 OS=Homo sapiens OX=9606 GN=ZC	1466;14813	NaN;NaN
456	C9J712;P35080	C9J712;P35080	Profilin-2	PFN2	NaN	NaN	NaN	NaN	2280500	2446100	NaN	NaN	NaN	2	5	1	1	56	8.8	8.8	9.7982	0.0088905	1.7763	23633000	4726600	5	2	0	1	1	0	11403000	12230000	47.3	56	56	3	4	5	0	1	1	0	1	1	DREGFFTNGLTLGAK;DSLYVDGDCTMDIR;EGFFTNGLTLGAK;SQGGEPTYNVAVGR;VLVFVMGK	tr|C9J712|C9J712_HUMAN Isoform of P35080, Profilin OS=Homo sapiens OX=9606 GN=PFN2 PE=1 SV=1;sp|P35080|PROF2_HUMAN Profilin-2 OS=Homo sapiens OX=9606 GN=PFN2 PE=1 SV=3	2828;2873;3503;14718;17276	NaN;NaN;NaN;NaN;NaN
457	C9J8D4;Q13724-2;Q13724;C9JDQ1	C9J8D4;Q13724-2;Q13724	Mannosyl-oligosaccharide glucosidase	MOGS	34325000	34339000	33505000	1308300	142100	101060	NaN	NaN	NaN	4	3	3	3	9.4	9.4	9.4	54.049	0	6.7592	75177000	243170	27	11	3	5	3	35325000	21928000	17924000	7.3	9.4	9.4	2	3	3	2	3	3	2	3	3	EVLLPEVGAK;LAGSLLTQALESHAEGFR;VDPALFPPVPLFTAVPSR	tr|C9J8D4|C9J8D4_HUMAN Isoform of Q13724, Mannosyl-oligosaccharide glucosidase (Fragment) OS=Homo sapiens OX=9606 GN=MOGS PE=1 SV=8;sp|Q13724-2|MOGS_HUMAN Isoform of Q13724, Isoform 2 of Mannosyl-oligosaccharide glucosidase OS=Homo sapiens OX=9606 GN=MOGS;	4284;9027;16519	NaN;NaN;NaN
458	C9J8U2;G5E977;Q6XQN6-3;Q6XQN6;Q6XQN6-2;H0YF31;H0YDA6;A0A087WUT5	C9J8U2;G5E977;Q6XQN6-3;Q6XQN6;Q6XQN6-2;H0YF31	Nicotinate phosphoribosyltransferase	NAPRT	NaN	NaN	NaN	736770	561340	356170	NaN	NaN	NaN	8	6	6	6	15.7	15.7	15.7	52.161	0	22.448	38287000	1654300	21	6	2	2	2	19019000	11788000	7479500	9.6	7.3	4.3	3	3	2	3	3	2	3	3	2	AFQGLLDTYSVWR;CPFGGAFALAAGLR;DAAEFELFFR;DADVQFLASVLPPDTDPAFFEHLR;LLEMGLR;LVAVGGQPR	tr|C9J8U2|C9J8U2_HUMAN Isoform of Q6XQN6, Nicotinate phosphoribosyltransferase domain containing 1, isoform CRA_e OS=Homo sapiens OX=9606 GN=NAPRT PE=1 SV=1;tr|G5E977|G5E977_HUMAN Isoform of Q6XQN6, Nicotinate phosphoribosyltransferase domain containing 1,	516;1889;1954;1968;10076;11088	NaN;NaN;NaN;NaN;NaN;NaN
459	C9JA28;Q9UNL2;Q9UNL2-2	C9JA28;Q9UNL2;Q9UNL2-2	Translocon-associated protein subunit gamma	SSR3	NaN	NaN	NaN	4387000	2019700	1936400	NaN	NaN	NaN	3	1	1	1	8	8	8	20.161	0.00046948	3.9303	41715000	8343100	5	1	1	0	0	21935000	10099000	9682100	8	8	8	1	1	1	1	1	1	1	1	1	QQSEEDLLLQDFSR	tr|C9JA28|C9JA28_HUMAN Isoform of Q9UNL2, Translocon-associated protein subunit gamma OS=Homo sapiens OX=9606 GN=SSR3 PE=1 SV=1;sp|Q9UNL2|SSRG_HUMAN Translocon-associated protein subunit gamma OS=Homo sapiens OX=9606 GN=SSR3 PE=1 SV=1;sp|Q9UNL2-2|SSRG_HUMA	13250	NaN
460	C9JA93;Q8TC07-2;Q8TC07-3;Q8TC07;F8VV61	C9JA93;Q8TC07-2;Q8TC07-3;Q8TC07	TBC1 domain family member 15	TBC1D15	NaN	NaN	NaN	631170	NaN	3421900	NaN	NaN	NaN	5	4	4	4	18	18	18	32.136	0	6.4903	81223000	4053100	19	3	2	0	1	16207000	0	65016000	15.1	0	2.9	3	0	1	3	0	1	3	0	1	FLLGYFPWDSTK;LLIESLEK;SLSQSFENLLDEPAYGLIQK;VTNYIFDSLR	tr|C9JA93|C9JA93_HUMAN Isoform of Q8TC07, TBC1 domain family member 15 (Fragment) OS=Homo sapiens OX=9606 GN=TBC1D15 PE=1 SV=1;sp|Q8TC07-2|TBC15_HUMAN Isoform of Q8TC07, Isoform 2 of TBC1 domain family member 15 OS=Homo sapiens OX=9606 GN=TBC1D15;sp|Q8TC07	4864;10153;14532;17733	NaN;NaN;NaN;NaN
461	C9JAL9;J3QR50;J3QRW3;J3KRG1;Q9BZE9;Q9BZE9-2	C9JAL9;J3QR50;J3QRW3;J3KRG1;Q9BZE9;Q9BZE9-2	Tether containing UBX domain for GLUT4	ASPSCR1	4049500	2966900	3052500	890520	326560	296660	NaN	NaN	NaN	6	1	1	1	27.6	27.6	27.6	6.184	0	4.4476	11346000	1513700	3	4	0	2	2	6843500	2284500	2218100	27.6	27.6	27.6	1	1	1	1	1	1	1	1	1	VTPSTVLLQVLEDTCR	tr|C9JAL9|C9JAL9_HUMAN Isoform of Q9BZE9, Tether-containing UBX domain for GLUT4 OS=Homo sapiens OX=9606 GN=ASPSCR1 PE=1 SV=2;tr|J3QR50|J3QR50_HUMAN Isoform of Q9BZE9, Tether-containing UBX domain for GLUT4 OS=Homo sapiens OX=9606 GN=ASPSCR1 PE=1 SV=1;tr|J	17738	NaN
462	C9JNK6;C9JAZ1;O75431-2;O75431	C9JNK6;C9JAZ1;O75431-2;O75431	Metaxin-2	MTX2	NaN	NaN	NaN	1474000	80080	65562	NaN	NaN	NaN	4	2	2	2	19.8	19.8	19.8	23.643	0	4.5776	14577000	1619600	9	3	1	1	1	13266000	720720	590050	19.8	10.6	10.6	2	1	1	2	1	1	2	1	1	TLDQVLEDVDQCCQALSQR;VPFIHVGNQVVSELGPIVQFVK	tr|C9JNK6|C9JNK6_HUMAN Isoform of O75431, Metaxin-2 OS=Homo sapiens OX=9606 GN=MTX2 PE=1 SV=1;tr|C9JAZ1|C9JAZ1_HUMAN Isoform of O75431, Metaxin-2 (Fragment) OS=Homo sapiens OX=9606 GN=MTX2 PE=1 SV=1;sp|O75431-2|MTX2_HUMAN Isoform of O75431, Isoform 2 of Me	15646;17423	NaN;NaN
463	C9JB30;Q9UPY8-2;Q9UPY8;K7ENB3;M0QX52;K7EL66;K7ERD8;Q15555-2	C9JB30;Q9UPY8-2;Q9UPY8;K7ENB3;M0QX52;K7EL66;K7ERD8;Q15555-2	Microtubule-associated protein RP/EB family member 3;Microtubule-associated protein RP/EB family member 2	MAPRE3;MAPRE2	NaN	NaN	NaN	NaN	NaN	239410	NaN	NaN	NaN	8	2	1	0	8.7	4.6	0	24.582	0.00042662	3.0922	3351700	239410	14	1	0	0	1	0	0	3351700	4.1	4.1	8.7	1	1	2	0	0	1	0	0	0	FFDANYDGK;LEHEYIHNFK	tr|C9JB30|C9JB30_HUMAN Isoform of Q9UPY8, Microtubule-associated protein RP/EB family member 3 (Fragment) OS=Homo sapiens OX=9606 GN=MAPRE3 PE=1 SV=1;sp|Q9UPY8-2|MARE3_HUMAN Isoform of Q9UPY8, Isoform 2 of Microtubule-associated protein RP/EB family member	4593;9389	NaN;NaN
464	C9JC63;E7EVY0;S4R3Q9;J3KNA0;Q15070-3;Q15070-2;Q15070	C9JC63;E7EVY0;S4R3Q9;J3KNA0;Q15070-3;Q15070-2;Q15070	Mitochondrial inner membrane protein OXA1L	OXA1L	NaN	NaN	NaN	NaN	469100	401800	NaN	NaN	NaN	7	1	1	1	10.7	10.7	10.7	12.728	0.00043234	3.2225	6096300	870900	7	2	0	1	1	0	3283700	2812600	0	10.7	10.7	0	1	1	0	1	1	0	1	1	CLIFPLIVTGQR	tr|C9JC63|C9JC63_HUMAN Isoform of Q15070, Mitochondrial inner membrane protein OXA1L (Fragment) OS=Homo sapiens OX=9606 GN=OXA1L PE=1 SV=2;tr|E7EVY0|E7EVY0_HUMAN Isoform of Q15070, Mitochondrial inner membrane protein OXA1L OS=Homo sapiens OX=9606 GN=OXA1L	1863	NaN
465	H7C131;C9JDE9;P09110;H0Y4D4;P09110-2	H7C131;C9JDE9;P09110;H0Y4D4;P09110-2	3-ketoacyl-CoA thiolase, peroxisomal	ACAA1	8108500	9640500	8090900	1074600	580610	456460	NaN	NaN	NaN	5	2	2	2	7.9	7.9	7.9	30.222	0	5.9177	29563000	2111700	14	6	2	2	2	15045000	8128500	6390400	7.9	7.9	7.9	2	2	2	2	2	2	2	2	2	AEELGLPILGVLR;QVITLLNELK	tr|H7C131|H7C131_HUMAN Isoform of P09110, 3-ketoacyl-CoA thiolase, peroxisomal (Fragment) OS=Homo sapiens OX=9606 GN=ACAA1 PE=1 SV=1;tr|C9JDE9|C9JDE9_HUMAN Isoform of P09110, 3-ketoacyl-CoA thiolase, peroxisomal OS=Homo sapiens OX=9606 GN=ACAA1 PE=1 SV=1;s	365;13343	NaN;NaN
466	C9JDR0;Q15738	C9JDR0;Q15738	Sterol-4-alpha-carboxylate 3-dehydrogenase, decarboxylating	NSDHL	NaN	NaN	NaN	1448900	248410	170320	NaN	NaN	NaN	2	3	3	3	15	15	15	28.146	0	8.5737	50031000	1867600	20	7	3	3	1	40356000	6268600	3406400	15	8.7	5.1	3	2	1	3	2	1	3	2	1	DPQLVPILIEAAR;FFLGDLCSR;NFLTTAIRPHGIFGPR	tr|C9JDR0|C9JDR0_HUMAN Isoform of Q15738, Sterol-4-alpha-carboxylate 3-dehydrogenase, decarboxylating (Fragment) OS=Homo sapiens OX=9606 GN=NSDHL PE=1 SV=1;sp|Q15738|NSDHL_HUMAN Sterol-4-alpha-carboxylate 3-dehydrogenase, decarboxylating OS=Homo sapiens OX	2769;4608;12042	NaN;NaN;NaN
467	C9JDY8;P51172-2	C9JDY8;P51172-2		SCNN1D	NaN	NaN	NaN	NaN	936130	NaN	NaN	NaN	NaN	2	1	1	1	12.9	12.9	12.9	14.686	1	-2	6552900	936130	7	1	0	1	0	0	6552900	0	0	12.9	0	0	1	0	0	1	0	0	1	0	MAFLSRTSPVAAASFQSR	tr|C9JDY8|C9JDY8_HUMAN Isoform of P51172, Amiloride-sensitive sodium channel subunit delta (Fragment) OS=Homo sapiens OX=9606 GN=SCNN1D PE=4 SV=1;sp|P51172-2|SCNND_HUMAN Isoform of P51172, Isoform 2 of Amiloride-sensitive sodium channel subunit delta OS=Ho	11369	NaN
468	C9JEH7;P22090	C9JEH7;P22090	40S ribosomal protein S4, Y isoform 1	RPS4Y1	21952000	19944000	15107000	1059200	1106500	811570	NaN	NaN	NaN	2	13	6	3	50.8	29.8	20.2	29.383	0	17.807	105220000	2977300	16	14	4	6	4	59375000	27205000	18636000	37.8	43.5	37	11	10	9	4	5	4	1	2	1	ECLPLIVFLR;ERHPGSFDVVHVK;FDTGNLCMVIGGANLGR;GIPHLVTHDAR;HPGSFDVVHVK;HWMLDKLTGVFAPRPSTGPHK;LRECLPLIVFLR;LSNIFVIGNGNKPWISLPR;LTGVFAPR;VDVTYPAGFMDVISIEK;VNDTVQIDLGTGK;YALTGDEVK;YALTGDEVKK	tr|C9JEH7|C9JEH7_HUMAN Isoform of P22090, 40S ribosomal protein S4, Y isoform 1 (Fragment) OS=Homo sapiens OX=9606 GN=RPS4Y1 PE=1 SV=1;sp|P22090|RS4Y1_HUMAN 40S ribosomal protein S4, Y isoform 1 OS=Homo sapiens OX=9606 GN=RPS4Y1 PE=1 SV=2	3261;4091;4526;5842;6840;6984;10753;10862;10971;16548;17336;18114;18115	NaN;NaN;NaN;NaN;NaN;NaN;NaN;NaN;NaN;NaN;NaN;NaN;NaN
469	C9JEV6;Q9UJ70;Q9UJ70-2;H0YE82;H7C1L7;H0YEB7;H7C3G9;H7C286	C9JEV6;Q9UJ70;Q9UJ70-2;H0YE82;H7C1L7;H0YEB7;H7C3G9	N-acetyl-D-glucosamine kinase	NAGK	13510000	16204000	14586000	858590	528470	502220	NaN	NaN	NaN	8	3	3	3	11.6	11.6	11.6	32.017	0	5.4679	40629000	1889300	14	7	2	2	3	19597000	11183000	9849200	8.2	8.2	11.6	2	2	3	2	2	3	2	2	3	AGVDPLVPLR;HIVAVLPEIDPVLFQGK;ILIEELR	tr|C9JEV6|C9JEV6_HUMAN Isoform of Q9UJ70, N-acetyl-D-glucosamine kinase OS=Homo sapiens OX=9606 GN=NAGK PE=1 SV=3;sp|Q9UJ70|NAGK_HUMAN N-acetyl-D-glucosamine kinase OS=Homo sapiens OX=9606 GN=NAGK PE=1 SV=4;sp|Q9UJ70-2|NAGK_HUMAN Isoform of Q9UJ70, Isoform	634;6746;7774	NaN;NaN;NaN
470	C9JFR7;P99999;CON__P62894	C9JFR7;P99999	Cytochrome c	CYCS	147190000	141820000	182920000	63161000	28635000	33685000	NaN	NaN	NaN	3	6	6	6	57.4	57.4	57.4	11.333	0	20.579	997060000	125480000	6	21	8	6	7	502330000	222760000	271970000	56.4	56.4	57.4	5	5	5	5	5	5	5	5	5	ADLIAYLK;GIIWGEDTLMEYLENPK;GIIWGEDTLMEYLENPKK;MIFVGIK;TGPNLHGLFGR;TGQAPGYSYTAANK	tr|C9JFR7|C9JFR7_HUMAN Isoform of P99999, Cytochrome c (Fragment) OS=Homo sapiens OX=9606 GN=CYCS PE=1 SV=1;sp|P99999|CYC_HUMAN Cytochrome c OS=Homo sapiens OX=9606 GN=CYCS PE=1 SV=2	304;5819;5820;11568;15445;15447	NaN;NaN;NaN;NaN;NaN;NaN
471	C9JG87;Q9NYK5;Q9NYK5-2	C9JG87;Q9NYK5;Q9NYK5-2	39S ribosomal protein L39, mitochondrial	MRPL39	NaN	19669000	19243000	676560	836990	770790	NaN	NaN	NaN	3	4	4	4	19.5	19.5	19.5	34.032	0	9.7564	57122000	2284300	20	8	3	2	3	21461000	16740000	18921000	15.5	9.1	13.1	3	2	3	3	2	3	3	2	3	DLPFETLEVEAK;IGDFIDVSEGPLIPR;RFQGVSLPVHLR;SILALVDGQPWDMYKPLTK	tr|C9JG87|C9JG87_HUMAN Isoform of Q9NYK5, 39S ribosomal protein L39, mitochondrial (Fragment) OS=Homo sapiens OX=9606 GN=MRPL39 PE=1 SV=1;sp|Q9NYK5|RM39_HUMAN 39S ribosomal protein L39, mitochondrial OS=Homo sapiens OX=9606 GN=MRPL39 PE=1 SV=3;sp|Q9NYK5-2|	2611;7405;13504;14272	NaN;NaN;NaN;NaN
472	C9JHW1;E7ESB6;I1E4Y6;Q6Y7W6-4;Q6Y7W6-5;Q6Y7W6;Q6Y7W6-3;C9JW88;F8WCD5;C9JPV7;C9JXQ0;C9J0V6;C9JHT0;C9JRZ2	C9JHW1;E7ESB6;I1E4Y6;Q6Y7W6-4;Q6Y7W6-5;Q6Y7W6;Q6Y7W6-3;C9JW88;F8WCD5;C9JPV7;C9JXQ0;C9J0V6;C9JHT0;C9JRZ2	PERQ amino acid-rich with GYF domain-containing protein 2	GIGYF2	NaN	NaN	NaN	177060	67708	NaN	NaN	NaN	NaN	14	2	2	2	5.1	5.1	5.1	81.788	0	4.4664	7280900	67708	27	2	1	1	0	4780600	2500400	0	3.1	5.1	0	1	2	0	1	2	0	1	2	0	AAETQTLNFGPEWLR;AALSSQQQQQLALLLQQFQTLK	tr|C9JHW1|C9JHW1_HUMAN Isoform of Q6Y7W6, GRB10-interacting GYF protein 2 (Fragment) OS=Homo sapiens OX=9606 GN=GIGYF2 PE=1 SV=1;tr|E7ESB6|E7ESB6_HUMAN Isoform of Q6Y7W6, GRB10-interacting GYF protein 2 (Fragment) OS=Homo sapiens OX=9606 GN=GIGYF2 PE=1 SV=	59;124	NaN;NaN
473	C9JIF9;P13798;H7C393;H7C1U0;C9JLK2;F8WEH5	C9JIF9;P13798	Acylamino-acid-releasing enzyme	APEH	36163000	36137000	29846000	2842300	1155200	757390	NaN	NaN	NaN	6	7	7	7	11.8	11.8	11.8	81.673	0	15.249	182960000	4754800	31	11	5	3	3	88110000	57525000	37330000	7.1	9.4	7.3	5	5	4	5	5	4	5	5	4	GSTGFGQDSILSLPGNVGHQDVK;QFLEVWEK;QVLLSEPEEAAALYR;SFNLSALEK;TPLLLMLGQEDR;VGFLPSAGK;VTSVVVDVVPR	tr|C9JIF9|C9JIF9_HUMAN Isoform of P13798, Acylamino-acid-releasing enzyme OS=Homo sapiens OX=9606 GN=APEH PE=1 SV=1;sp|P13798|ACPH_HUMAN Acylamino-acid-releasing enzyme OS=Homo sapiens OX=9606 GN=APEH PE=1 SV=4	6326;12962;13352;14092;15879;16792;17749	NaN;NaN;NaN;NaN;NaN;NaN;NaN
474	C9JIG9;O95747	C9JIG9;O95747	Serine/threonine-protein kinase OSR1	OXSR1	26672000	33622000	31366000	1885900	1429100	1221800	NaN	NaN	NaN	2	3	3	2	6.2	6.2	4.7	51.856	0	9.1831	95271000	4536700	21	8	2	3	3	39604000	30010000	25657000	4.7	6.2	6.2	2	3	3	2	3	3	2	2	2	FEFTPGR;IPISLVLR;SGVLDESTIATILR	tr|C9JIG9|C9JIG9_HUMAN Isoform of O95747, Serine/threonine-protein kinase OSR1 OS=Homo sapiens OX=9606 GN=OXSR1 PE=1 SV=1;sp|O95747|OXSR1_HUMAN Serine/threonine-protein kinase OSR1 OS=Homo sapiens OX=9606 GN=OXSR1 PE=1 SV=1	4550;7991;14195	NaN;NaN;NaN
475	C9JIR6;O75688-5;O75688-4;O75688-2;O75688	C9JIR6;O75688-5;O75688-4;O75688-2;O75688	Protein phosphatase 1B	PPM1B	NaN	NaN	NaN	185670	112010	NaN	NaN	NaN	NaN	5	1	1	1	4.8	4.8	4.8	41.83	0	7.4711	5953600	297680	20	2	1	1	0	3713400	2240200	0	4.8	4.8	0	1	1	0	1	1	0	1	1	0	GPTEQLVSPEPEVYEILR	tr|C9JIR6|C9JIR6_HUMAN Isoform of O75688, Protein phosphatase 1B (Fragment) OS=Homo sapiens OX=9606 GN=PPM1B PE=1 SV=1;sp|O75688-5|PPM1B_HUMAN Isoform of O75688, Isoform 5 of Protein phosphatase 1B OS=Homo sapiens OX=9606 GN=PPM1B;sp|O75688-4|PPM1B_HUMAN I	6199	NaN
476	C9JIZ6;P07602;P07602-2;P07602-3;A0A0J9YXB8;Q5BJH1	C9JIZ6;P07602;P07602-2;P07602-3	Prosaposin;Saposin-A;Saposin-B-Val;Saposin-B;Saposin-C;Saposin-D	PSAP	40816000	51881000	35174000	3571300	1985700	109300	NaN	NaN	NaN	6	7	7	7	12.7	12.7	12.7	58.44	0	13.943	189160000	5666400	31	14	4	7	3	110710000	69914000	8529300	8	11	5.5	4	6	3	4	6	3	4	6	3	DGGFCEVCK;EIVDSYLPVILDIIK;LVGYLDR;NVIPALELVEPIK;NVIPALELVEPIKK;QEILAALEK;SDVYCEVCEFLVK	tr|C9JIZ6|C9JIZ6_HUMAN Isoform of P07602, Prosaposin OS=Homo sapiens OX=9606 GN=PSAP PE=1 SV=2;sp|P07602|SAP_HUMAN Prosaposin OS=Homo sapiens OX=9606 GN=PSAP PE=1 SV=2;sp|P07602-2|SAP_HUMAN Isoform of P07602, Isoform Sap-mu-6 of Prosaposin OS=Homo sapiens	2255;3669;11134;12593;12594;12916;13965	NaN;NaN;NaN;NaN;NaN;NaN;NaN
477	C9JJ19;P82930	C9JJ19;P82930	28S ribosomal protein S34, mitochondrial	MRPS34	NaN	NaN	NaN	NaN	43480	54391	NaN	NaN	NaN	2	1	1	1	6.7	6.7	6.7	26.332	0.00042052	2.9892	1272300	97871	13	3	1	1	1	0	565240	707080	6.7	6.7	6.7	1	1	1	1	1	1	1	1	1	LLQLLGRLPLFGLGR	tr|C9JJ19|C9JJ19_HUMAN Isoform of P82930, 28S ribosomal protein S34, mitochondrial OS=Homo sapiens OX=9606 GN=MRPS34 PE=1 SV=2;sp|P82930|RT34_HUMAN 28S ribosomal protein S34, mitochondrial OS=Homo sapiens OX=9606 GN=MRPS34 PE=1 SV=2	10261	NaN
478	C9JJT5;C9JU26;G3V325;P56134-4;P56134-3;P56134-2;P56134	C9JJT5;C9JU26;G3V325;P56134-4;P56134-3;P56134-2;P56134	ATP synthase subunit f, mitochondrial	ATP5J2-PTCD1;ATP5J2	39970000	43904000	35593000	17340000	8847700	6882900	NaN	NaN	NaN	7	2	2	2	44.4	44.4	44.4	5.9149	0	12.795	132280000	33070000	4	9	3	3	3	69359000	35391000	27532000	44.4	44.4	44.4	2	2	2	2	2	2	2	2	2	DFSPSGIFGAFQR;LGELPSWILMR	tr|C9JJT5|C9JJT5_HUMAN Isoform of G3V325, ATP5MF-PTCD1 readthrough OS=Homo sapiens OX=9606 GN=ATP5MF-PTCD1 PE=4 SV=2;tr|C9JU26|C9JU26_HUMAN Isoform of P56134, ATP synthase membrane subunit f OS=Homo sapiens OX=9606 GN=ATP5MF PE=1 SV=1;tr|G3V325|G3V325_HUMA	2216;9630	NaN;NaN
479	P15313;C9JL73;C9JNS9	P15313;C9JL73;C9JNS9	V-type proton ATPase subunit B, kidney isoform	ATP6V1B1	NaN	NaN	NaN	409890	NaN	NaN	NaN	NaN	NaN	3	4	1	1	13.1	3.5	3.5	56.832	1	-2	11067000	409890	27	0	0	0	0	11067000	0	0	10.3	3.9	6.6	3	1	2	1	0	0	1	0	0	FAQYAEIVHFTLPDGTQR;IPIFSAAGLPHNEIAAQICR;LALTTAEFLAYQCEK;QIYPPINVLPSLSR	sp|P15313|VATB1_HUMAN V-type proton ATPase subunit B, kidney isoform OS=Homo sapiens OX=9606 GN=ATP6V1B1 PE=1 SV=3;tr|C9JL73|C9JL73_HUMAN Isoform of P15313, V-type proton ATPase subunit B, kidney isoform OS=Homo sapiens OX=9606 GN=ATP6V1B1 PE=1 SV=1;tr|C9J	4440;7988;9064;13077	NaN;NaN;NaN;NaN
480	C9JLF4;Q9NVH0-2;Q9NVH0	C9JLF4;Q9NVH0-2;Q9NVH0	Exonuclease 3-5 domain-containing protein 2	EXD2	NaN	NaN	NaN	278850	99115	97216	NaN	NaN	NaN	3	1	1	1	11.4	11.4	11.4	12.421	0.0037023	2.1491	3326300	475180	7	2	0	1	1	1952000	693810	680510	11.4	11.4	11.4	1	1	1	1	1	1	1	1	1	TLLDILADGTILK	tr|C9JLF4|C9JLF4_HUMAN Isoform of Q9NVH0, Exonuclease 3-5 domain-containing protein 2 (Fragment) OS=Homo sapiens OX=9606 GN=EXD2 PE=1 SV=1;sp|Q9NVH0-2|EXD2_HUMAN Isoform of Q9NVH0, Isoform 2 of Exonuclease 3-5 domain-containing protein 2 OS=Homo sapien	15702	NaN
481	C9JLU1;P52434;P52434-4;P52434-3;P52434-2;P52434-5	C9JLU1;P52434;P52434-4;P52434-3;P52434-2	DNA-directed RNA polymerases I, II, and III subunit RPABC3	POLR2H	NaN	NaN	NaN	3623000	1201000	418940	NaN	NaN	NaN	6	5	5	5	41.2	41.2	41.2	16.925	0	16.163	47186000	5242900	9	7	4	2	1	32607000	10809000	3770400	33.8	16.2	8.8	4	2	1	4	2	1	4	2	1	ADQFEYVMYGK;AGILFEDIFDVK;IEGDETSTEAATR;LHCESESFK;LQGDANNLHGFEVDSR	tr|C9JLU1|C9JLU1_HUMAN Isoform of P52434, DNA-directed RNA polymerases I, II, and III subunit RPABC3 (Fragment) OS=Homo sapiens OX=9606 GN=POLR2H PE=1 SV=8;sp|P52434|RPAB3_HUMAN DNA-directed RNA polymerases I, II, and III subunit RPABC3 OS=Homo sapiens OX=	318;575;7254;9780;10639	NaN;NaN;NaN;NaN;NaN
482	C9JMA6;P0DN79;P35520;P35520-2	C9JMA6;P0DN79;P35520;P35520-2	Cystathionine beta-synthase	CBS	NaN	NaN	NaN	424810	NaN	NaN	NaN	NaN	NaN	4	1	1	1	16.4	16.4	16.4	19.087	0	5.9453	4248100	424810	10	1	1	0	0	4248100	0	0	16.4	0	0	1	0	0	1	0	0	1	0	0	DGTLKPGDTIIEPTSGNTGIGLALAAAVR	tr|C9JMA6|C9JMA6_HUMAN Isoform of P35520, Cystathionine beta-synthase (Fragment) OS=Homo sapiens OX=9606 GN=CBS PE=1 SV=1;sp|P0DN79|CBSL_HUMAN Cystathionine beta-synthase-like protein OS=Homo sapiens OX=9606 GN=CBSL PE=1 SV=1;sp|P35520|CBS_HUMAN Cystathion	2310	NaN
483	C9JN15;E9PG73;Q13427-2;Q13427;C9JM79;C9JT64;C9J679	C9JN15;E9PG73;Q13427-2;Q13427;C9JM79	Peptidyl-prolyl cis-trans isomerase;Peptidyl-prolyl cis-trans isomerase G	PPIG	NaN	NaN	NaN	840360	703960	736460	NaN	NaN	NaN	7	3	3	3	13.4	13.4	13.4	27.409	0	6.7033	20527000	2280800	9	2	0	1	1	7563200	6335600	6628200	3.7	4.9	9.8	1	1	2	1	1	2	1	1	2	EFLLSMANR;TDAASKPFAEVR;VVFELFSDVCPK	tr|C9JN15|C9JN15_HUMAN Isoform of Q13427, Peptidyl-prolyl cis-trans isomerase (Fragment) OS=Homo sapiens OX=9606 GN=PPIG PE=1 SV=1;tr|E9PG73|E9PG73_HUMAN Isoform of Q13427, Peptidyl-prolyl cis-trans isomerase G OS=Homo sapiens OX=9606 GN=PPIG PE=1 SV=1;sp|	3438;15194;17811	NaN;NaN;NaN
484	F2Z2Y6;C9JNV3;O95777;C9JIZ0	F2Z2Y6;C9JNV3;O95777;C9JIZ0	U6 snRNA-associated Sm-like protein LSm8	LSM8	NaN	NaN	NaN	12381000	5714500	4152400	NaN	NaN	NaN	4	3	3	3	67.2	67.2	67.2	7.3713	0	6.8268	111240000	22248000	5	3	2	0	1	61906000	28573000	20762000	52.2	23.9	38.8	2	1	2	2	1	2	2	1	2	GFDQTINLILDESHER;TSALENYINR;VFSSSQGVEQVVLGLYIVR	tr|F2Z2Y6|F2Z2Y6_HUMAN Isoform of O95777, U6 snRNA-associated Sm-like protein LSm8 OS=Homo sapiens OX=9606 GN=LSM8 PE=1 SV=1;tr|C9JNV3|C9JNV3_HUMAN Isoform of O95777, U6 snRNA-associated Sm-like protein LSm8 (Fragment) OS=Homo sapiens OX=9606 GN=LSM8 PE=1	5581;15961;16752	NaN;NaN;NaN
485	C9JXB8;C9JNW5;P83731	C9JXB8;C9JNW5;P83731	60S ribosomal protein L24	RPL24	97622000	103240000	158570000	28360000	20018000	25452000	NaN	NaN	NaN	3	5	5	5	39.7	39.7	39.7	14.369	0	14.053	516810000	73830000	7	14	4	5	5	198520000	140130000	178160000	28.9	39.7	39.7	4	5	5	4	5	5	4	5	5	AITGASLADIMAK;QINWTVLYR;RNQKPEVR;VELCSFSGYK;VFQFLNAK	tr|C9JXB8|C9JXB8_HUMAN Isoform of P83731, 60S ribosomal protein L24 OS=Homo sapiens OX=9606 GN=RPL24 PE=1 SV=1;tr|C9JNW5|C9JNW5_HUMAN Isoform of P83731, 60S ribosomal protein L24 OS=Homo sapiens OX=9606 GN=RPL24 PE=1 SV=1;sp|P83731|RL24_HUMAN 60S ribosomal	787;13056;13654;16609;16741	NaN;NaN;NaN;NaN;NaN
486	C9JP16;O75718	C9JP16;O75718	Cartilage-associated protein	CRTAP	NaN	NaN	NaN	600100	38184	156240	NaN	NaN	NaN	2	3	3	3	8.4	8.4	8.4	41.432	0.0008316	2.8905	18274000	794530	23	2	1	1	0	13802000	878240	3593500	2	4.2	2.2	1	1	1	1	1	1	1	1	1	LFGGLLR;SYESLFIR;TSITDMELALPDFFK	tr|C9JP16|C9JP16_HUMAN Isoform of O75718, Cartilage-associated protein OS=Homo sapiens OX=9606 GN=CRTAP PE=1 SV=1;sp|O75718|CRTAP_HUMAN Cartilage-associated protein OS=Homo sapiens OX=9606 GN=CRTAP PE=1 SV=1	9508;15047;15992	NaN;NaN;NaN
487	C9JPM4;P18085;C9JAK5	C9JPM4;P18085;C9JAK5	ADP-ribosylation factor 4	ARF4	NaN	NaN	NaN	3534900	2817600	2573700	NaN	NaN	NaN	3	5	2	2	58.3	18.9	18.9	14.553	0	20.316	71410000	8926200	8	4	1	1	2	28279000	22541000	20590000	50.4	47.2	44.1	4	4	4	1	1	2	1	1	2	HYFQNTQGLIFVVDSNDR;ILMVGLDAAGK;IQEVADELQK;LGEIVTTIPTIGFNVETVEYK;NICFTVWDVGGQDR	tr|C9JPM4|C9JPM4_HUMAN Isoform of P18085, ADP-ribosylation factor 4 (Fragment) OS=Homo sapiens OX=9606 GN=ARF4 PE=1 SV=1;sp|P18085|ARF4_HUMAN ADP-ribosylation factor 4 OS=Homo sapiens OX=9606 GN=ARF4 PE=1 SV=3;tr|C9JAK5|C9JAK5_HUMAN Isoform of P18085, ADP-	6992;7808;8037;9628;12121	NaN;NaN;NaN;NaN;NaN
488	G5E9W8;C9JQ42;P46976-3;P46976-2;P46976	G5E9W8;C9JQ42;P46976-3;P46976-2;P46976	Glycogenin-1	GYG1	NaN	NaN	NaN	NaN	NaN	722120	NaN	NaN	NaN	5	2	2	2	15.5	15.5	15.5	21.51	0	5.9033	5776900	722120	8	0	0	0	0	0	0	5776900	0	0	15.5	0	0	2	0	0	2	0	0	2	LVVLATPQVSDSMR;TDQAFVTLTTNDAYAK	tr|G5E9W8|G5E9W8_HUMAN Isoform of P46976, Glycogenin 1, isoform CRA_e OS=Homo sapiens OX=9606 GN=GYG1 PE=1 SV=1;tr|C9JQ42|C9JQ42_HUMAN Isoform of P46976, Glycogenin-1 (Fragment) OS=Homo sapiens OX=9606 GN=GYG1 PE=1 SV=8;sp|P46976-3|GLYG_HUMAN Isoform of P4	11256;15242	NaN;NaN
489	C9JQD4;O43447;A6NM32;H0YEL5;O43447-2	C9JQD4;O43447;A6NM32;H0YEL5;O43447-2	Peptidyl-prolyl cis-trans isomerase;Peptidyl-prolyl cis-trans isomerase H	PPIH	20636000	25528000	29627000	3298500	1843500	2030500	NaN	NaN	NaN	5	2	2	2	13.2	13.2	13.2	15.8	0	4.73	64553000	7172600	9	5	1	2	2	29687000	16592000	18275000	13.2	13.2	13.2	2	2	2	2	2	2	2	2	2	IELFADVVPK;IIDGLLVMR	tr|C9JQD4|C9JQD4_HUMAN Isoform of O43447, Peptidyl-prolyl cis-trans isomerase (Fragment) OS=Homo sapiens OX=9606 GN=PPIH PE=1 SV=1;sp|O43447|PPIH_HUMAN Peptidyl-prolyl cis-trans isomerase H OS=Homo sapiens OX=9606 GN=PPIH PE=1 SV=1;tr|A6NM32|A6NM32_HUMAN I	7271;7557	NaN;NaN
490	C9JRZ6;F8WAR4;Q9NX63;A0A286YEX5	C9JRZ6;F8WAR4;Q9NX63;A0A286YEX5	MICOS complex subunit MIC19	CHCHD3	NaN	NaN	NaN	NaN	863900	753070	NaN	NaN	NaN	4	2	2	2	8.2	8.2	8.2	26.753	0	4.6927	22637000	1617000	14	2	0	1	1	0	12095000	10543000	0	8.2	4.7	0	2	1	0	2	1	0	2	1	LSENVIDR;VAEELALEQAK	tr|C9JRZ6|C9JRZ6_HUMAN Isoform of Q9NX63, MICOS complex subunit OS=Homo sapiens OX=9606 GN=CHCHD3 PE=1 SV=2;tr|F8WAR4|F8WAR4_HUMAN Isoform of Q9NX63, MICOS complex subunit OS=Homo sapiens OX=9606 GN=CHCHD3 PE=1 SV=1;sp|Q9NX63|MIC19_HUMAN MICOS complex subu	10816;16300	NaN;NaN
491	C9JTJ1;Q9Y6R6	C9JTJ1;Q9Y6R6	Zinc finger protein 780B	ZNF780B	NaN	NaN	NaN	401640	207910	153890	NaN	NaN	NaN	2	1	1	1	1.3	1.3	1.3	79.359	0.0067954	1.8464	22903000	763430	30	0	0	0	0	12049000	6237200	4616600	1.3	1.3	1.3	1	1	1	1	1	1	1	1	1	HQKIHMGEK	tr|C9JTJ1|C9JTJ1_HUMAN Isoform of Q9Y6R6, Hypothetical BC331191_1, isoform CRA_c OS=Homo sapiens OX=9606 GN=ZNF780B PE=1 SV=1;sp|Q9Y6R6|Z780B_HUMAN Zinc finger protein 780B OS=Homo sapiens OX=9606 GN=ZNF780B PE=2 SV=1	6866	NaN
492	C9JVN1;P08582-2;P08582	C9JVN1;P08582-2;P08582	Melanotransferrin	MFI2	NaN	NaN	NaN	NaN	NaN	NaN	NaN	NaN	NaN	3	1	1	1	8.8	8.8	8.8	19.309	0.00043687	3.2898	0	0	11	1	0	1	0	0	0	0	0	8.8	0	0	1	0	0	1	0	0	1	0	TVGWNVPVGYLVESGR	tr|C9JVN1|C9JVN1_HUMAN Isoform of P08582, Melanotransferrin (Fragment) OS=Homo sapiens OX=9606 GN=MELTF PE=1 SV=1;sp|P08582-2|TRFM_HUMAN Isoform of P08582, Isoform 2 of Melanotransferrin OS=Homo sapiens OX=9606 GN=MELTF;sp|P08582|TRFM_HUMAN Melanotransferr	16134	NaN
493	H7C4M9;C9JZG9;C9JZY6;P62256-2;P62256;C9J8Q9	H7C4M9;C9JZG9;C9JZY6;P62256-2;P62256	Ubiquitin-conjugating enzyme E2 H	UBE2H	16750000	17451000	19132000	6196000	2647000	2529600	NaN	NaN	NaN	6	3	3	3	64.5	64.5	64.5	7.0801	0	8.4376	64934000	11373000	3	7	2	2	3	30336000	14319000	20279000	48.4	48.4	64.5	2	2	3	2	2	3	2	2	3	FYGPQGTPYEGGVWK;HEVTILGGLNEFVVK;VDLPDKYPFK	tr|H7C4M9|H7C4M9_HUMAN Isoform of P62256, Ubiquitin-conjugating enzyme E2 H (Fragment) OS=Homo sapiens OX=9606 GN=UBE2H PE=1 SV=1;tr|C9JZG9|C9JZG9_HUMAN Isoform of P62256, Ubiquitin-conjugating enzyme E2 H (Fragment) OS=Homo sapiens OX=9606 GN=UBE2H PE=1 S	5280;6637;16507	NaN;NaN;NaN
494	O60716;C9JZR2;O60716-13;O60716-11;O60716-14;O60716-12;O60716-10;O60716-8;O60716-17;O60716-15;O60716-5;O60716-2;O60716-3;O60716-6;O60716-4;O60716-7;O60716-9;O60716-18;O60716-16;O60716-20;O60716-22;O60716-19;O60716-21;O60716-23;O60716-24;O60716-26;O60716-25;O60716-28;O60716-30;O60716-27;O60716-29;O60716-31;O60716-32;E9PRE2;E9PKY0	O60716;C9JZR2;O60716-13;O60716-11;O60716-14;O60716-12;O60716-10;O60716-8;O60716-17;O60716-15;O60716-5;O60716-2;O60716-3;O60716-6;O60716-4;O60716-7;O60716-9;O60716-18;O60716-16;O60716-20;O60716-22;O60716-19;O60716-21;O60716-23;O60716-24;O60716-26;O60716-25;O60716-28;O60716-30;O60716-27;O60716-29;O60716-31;O60716-32	Catenin delta-1	CTNND1	72591000	81752000	74370000	2569200	923580	902520	NaN	NaN	NaN	35	8	8	8	13.6	13.6	13.6	108.17	0	45.234	487160000	4395300	48	27	10	9	8	276390000	117670000	93107000	12.6	7.9	8.9	7	5	6	7	5	6	7	5	6	AAALVLQTIWGYK;ALSAIADLLTNEHER;DMDLTEVITGTLWNLSSHDSIK;GIPVLVGLLDHPK;HIEWESVLTNTAGCLR;MEIVDHALHALTDEVIIPHSGWER;TPAILEASAGAIQNLCAGR;VGGSSVDLHR	sp|O60716|CTND1_HUMAN Catenin delta-1 OS=Homo sapiens OX=9606 GN=CTNND1 PE=1 SV=1;tr|C9JZR2|C9JZR2_HUMAN Isoform of O60716, Catenin delta-1 OS=Homo sapiens OX=9606 GN=CTNND1 PE=1 SV=2;sp|O60716-13|CTND1_HUMAN Isoform of O60716, Isoform 2A of Catenin delta-	27;1030;2672;5849;6731;11467;15848;16797	NaN;NaN;NaN;NaN;NaN;NaN;NaN;NaN
567	D3DTX6;Q96SB3	D3DTX6;Q96SB3	Neurabin-2	PPP1R9B	NaN	NaN	NaN	NaN	110250	83106	NaN	NaN	NaN	2	1	1	1	1.5	1.5	1.5	89.333	1	-2	5994000	193350	31	2	0	1	1	0	3417700	2576300	0	1.5	1.5	0	1	1	0	1	1	0	1	1	ISELEGNLQTLR	tr|D3DTX6|D3DTX6_HUMAN Isoform of Q96SB3, Neurabin-2 OS=Homo sapiens OX=9606 GN=PPP1R9B PE=1 SV=1;sp|Q96SB3|NEB2_HUMAN Neurabin-2 OS=Homo sapiens OX=9606 GN=PPP1R9B PE=1 SV=2	8124	NaN
568	K7EIE9;D3DUJ3;K7EQG9;P17706-3;P17706-2;P17706-4;P17706	K7EIE9;D3DUJ3;K7EQG9;P17706-3;P17706-2;P17706-4;P17706	Protein-tyrosine-phosphatase;Tyrosine-protein phosphatase non-receptor type;Tyrosine-protein phosphatase non-receptor type 2	PTPN2	NaN	NaN	NaN	NaN	NaN	580100	NaN	NaN	NaN	7	1	1	1	7.3	7.3	7.3	17.644	0.0019186	2.3718	5220900	580100	9	1	0	0	1	0	0	5220900	0	0	7.3	0	0	1	0	0	1	0	0	1	MGLIQTPDQLR	tr|K7EIE9|K7EIE9_HUMAN Isoform of P17706, Tyrosine-protein phosphatase (Fragment) OS=Homo sapiens OX=9606 GN=PTPN2 PE=1 SV=1;tr|D3DUJ3|D3DUJ3_HUMAN Isoform of P17706, Tyrosine-protein phosphatase OS=Homo sapiens OX=9606 GN=PTPN2 PE=1 SV=1;tr|K7EQG9|K7EQG9_	11537	NaN
569	D3YTB1;F8W727;P62910;D3YTI8	D3YTB1;F8W727;P62910	60S ribosomal protein L32	RPL32	102400000	116020000	131540000	57303000	24401000	32164000	NaN	NaN	NaN	4	8	8	8	52.6	52.6	52.6	15.616	0	40.865	839910000	113870000	7	17	5	5	7	427270000	170810000	241840000	45.1	39.8	47.4	7	6	7	7	6	7	7	6	7	AALRPLVKPK;AAQLAIR;ELEVLLMCNK;FLVHNVK;GQILMPNIGYGSNK;GQILMPNIGYGSNKK;HMLPSGFR;SYCAEIAHNVSSK	tr|D3YTB1|D3YTB1_HUMAN Isoform of P62910, 60S ribosomal protein L32 (Fragment) OS=Homo sapiens OX=9606 GN=RPL32 PE=1 SV=1;tr|F8W727|F8W727_HUMAN Isoform of P62910, 60S ribosomal protein L32 OS=Homo sapiens OX=9606 GN=RPL32 PE=1 SV=1;sp|P62910|RL32_HUMAN 60	120;155;3759;4912;6222;6223;6808;15039	NaN;NaN;NaN;NaN;NaN;NaN;NaN;NaN
570	D4Q8H0;Q9NYL2-2;C9J3F7;Q9NYL2-3;Q9NYL2	D4Q8H0;Q9NYL2-2;C9J3F7;Q9NYL2-3;Q9NYL2	Mitogen-activated protein kinase kinase kinase MLT	pk;ZAK	8940600	17233000	NaN	450750	284980	248800	NaN	NaN	NaN	5	3	3	3	8.4	8.4	8.4	51.582	0	10.871	31498000	984530	16	7	2	3	2	14192000	13325000	3980700	5.9	8.4	5.9	2	3	2	2	3	2	2	3	2	EAEILSVLSHR;LTEQSNTPLLLPLAAR;SSLGASFVQIK	tr|D4Q8H0|D4Q8H0_HUMAN Isoform of Q9NYL2, Mitogen-activated protein kinase kinase kinase MLT OS=Homo sapiens OX=9606 GN=pk PE=1 SV=1;sp|Q9NYL2-2|M3K20_HUMAN Isoform of Q9NYL2, Isoform 2 of Mitogen-activated protein kinase kinase kinase 20 OS=Homo sapiens O	3123;10954;14811	NaN;NaN;NaN
571	D6R905;D6RA17;D6RIY6;Q06265;Q06265-2;D6RAP4;Q06265-3;Q06265-4	D6R905;D6RA17;D6RIY6;Q06265;Q06265-2;D6RAP4;Q06265-3;Q06265-4	Exosome complex component RRP45	EXOSC9	NaN	NaN	NaN	2103700	640050	NaN	NaN	NaN	NaN	8	2	2	2	13.3	13.3	13.3	25.658	0	5.0467	24694000	2743800	9	2	1	1	0	18933000	5760500	0	13.3	7.1	0	2	1	0	2	1	0	2	1	0	CIDTESLCVVAGEK;ISFGTDYGCCIVELGK	tr|D6R905|D6R905_HUMAN Isoform of Q06265, Exosome complex component RRP45 (Fragment) OS=Homo sapiens OX=9606 GN=EXOSC9 PE=1 SV=1;tr|D6RA17|D6RA17_HUMAN Isoform of Q06265, Exosome complex component RRP45 OS=Homo sapiens OX=9606 GN=EXOSC9 PE=1 SV=1;tr|D6RIY6	1827;8130	NaN;NaN
572	D6R992;Q01201	D6R992;Q01201	Transcription factor RelB	RELB	NaN	NaN	NaN	569130	182520	112670	NaN	NaN	NaN	2	1	1	1	1.9	1.9	1.9	61.776	1	-2	24201000	864310	28	3	1	1	1	15936000	5110500	3154700	1.9	1.9	1.9	1	1	1	1	1	1	1	1	1	NHQEVDMNVVR	tr|D6R992|D6R992_HUMAN Isoform of Q01201, Transcription factor RelB OS=Homo sapiens OX=9606 GN=RELB PE=1 SV=1;sp|Q01201|RELB_HUMAN Transcription factor RelB OS=Homo sapiens OX=9606 GN=RELB PE=1 SV=2	12116	NaN
573	D6R9P3;D6RD18;D6RBZ0;Q99729-3;Q99729-2;Q99729-4;Q99729	D6R9P3;D6RD18;D6RBZ0;Q99729-3;Q99729-2;Q99729-4;Q99729	Heterogeneous nuclear ribonucleoprotein A/B	HNRNPAB	220520000	197450000	212010000	34864000	15164000	14533000	NaN	NaN	NaN	7	8	8	8	27.5	27.5	27.5	30.302	0	47.343	843760000	64561000	13	20	10	5	5	457690000	197140000	188930000	27.5	19.6	19.6	7	5	5	7	5	5	7	5	5	EVYQQQQYGSGGR;EYFGEFGEIEAIELPMDPK;GFGFILFK;GFVFITFK;IFVGGLNPEATEEK;IREYFGEFGEIEAIELPMDPK;MFVGGLSWDTSK;RGFVFITFK	tr|D6R9P3|D6R9P3_HUMAN Isoform of Q99729, Heterogeneous nuclear ribonucleoprotein A/B OS=Homo sapiens OX=9606 GN=HNRNPAB PE=1 SV=1;tr|D6RD18|D6RD18_HUMAN Isoform of Q99729, Heterogeneous nuclear ribonucleoprotein A/B OS=Homo sapiens OX=9606 GN=HNRNPAB PE=1	4334;4359;5599;5657;7384;8101;11515;13524	NaN;NaN;NaN;NaN;NaN;NaN;NaN;NaN
574	D6RBF6;D6RFG2;D6R9U8;D6RIR6;Q9BUT1-2;Q9BUT1	D6RBF6;D6RFG2;D6R9U8;D6RIR6;Q9BUT1-2;Q9BUT1	3-hydroxybutyrate dehydrogenase type 2	BDH2	NaN	NaN	NaN	348710	NaN	NaN	NaN	NaN	NaN	6	1	1	1	32.8	32.8	32.8	6.8659	0.002984	2.1897	1046100	348710	3	1	1	0	0	1046100	0	0	32.8	0	0	1	0	0	1	0	0	1	0	0	VIILTAAAQGIGQAAALAFAR	tr|D6RBF6|D6RBF6_HUMAN Isoform of Q9BUT1, 3-hydroxybutyrate dehydrogenase type 2 OS=Homo sapiens OX=9606 GN=BDH2 PE=1 SV=1;tr|D6RFG2|D6RFG2_HUMAN Isoform of Q9BUT1, 3-hydroxybutyrate dehydrogenase type 2 OS=Homo sapiens OX=9606 GN=BDH2 PE=1 SV=1;tr|D6R9U8|	16950	NaN
575	D6RIZ4;D6RA47;D6RE79;Q14728	D6RIZ4;D6RA47;D6RE79;Q14728	Major facilitator superfamily domain-containing protein 10	MFSD10	NaN	NaN	NaN	426990	202910	181820	NaN	NaN	NaN	4	1	1	1	3.7	3.7	3.7	38.247	0.002259	2.2624	12176000	811720	15	6	2	2	2	6404900	3043700	2727300	3.7	3.7	3.7	1	1	1	1	1	1	1	1	1	DAADLLSPLALLR	tr|D6RIZ4|D6RIZ4_HUMAN Isoform of Q14728, Major facilitator superfamily domain-containing protein 10 OS=Homo sapiens OX=9606 GN=MFSD10 PE=1 SV=1;tr|D6RA47|D6RA47_HUMAN Isoform of Q14728, Major facilitator superfamily domain-containing protein 10 OS=Homo sa	1953	NaN
576	D6RAX7;D6RFN0;Q9BT78-2;Q9BT78;D6RD63	D6RAX7;D6RFN0;Q9BT78-2;Q9BT78;D6RD63	COP9 signalosome complex subunit 4	COPS4	18763000	21851000	20129000	499710	403750	447180	NaN	NaN	NaN	5	7	7	7	24.3	24.3	24.3	47.726	0	11.725	93109000	1350600	23	11	3	4	4	40694000	27211000	25204000	13.1	16.7	15	3	5	4	3	5	4	3	5	4	AVIEHNLLSASK;GNQLQEFAAMLMPHQK;LYNNITFEELGALLEIPAAK;MLATLFK;NAAQVLVGIPLETGQK;QLLTDFCTHLPNLPDSTAK;VISFEEQVASIR	tr|D6RAX7|D6RAX7_HUMAN Isoform of Q9BT78, COP9 constitutive photomorphogenic-like protein subunit 4 isoform 2 OS=Homo sapiens OX=9606 GN=COPS4 PE=1 SV=1;tr|D6RFN0|D6RFN0_HUMAN Isoform of Q9BT78, COP9 signalosome complex subunit 4 OS=Homo sapiens OX=9606 GN	1601;6118;11336;11594;11849;13144;16987	NaN;NaN;NaN;NaN;NaN;NaN;NaN
577	D6RF21;D6RGC7;H0Y963;D6RAZ2;H0Y8S9;Q9UBK8-2;Q9UBK8	D6RF21;D6RGC7;H0Y963;D6RAZ2;H0Y8S9;Q9UBK8-2;Q9UBK8	Methionine synthase reductase	MTRR	NaN	NaN	NaN	2563400	656040	NaN	NaN	NaN	NaN	7	1	1	1	17.4	17.4	17.4	10.251	0.0011872	2.5594	12878000	3219500	4	2	1	1	0	10254000	2624200	0	17.4	17.4	0	1	1	0	1	1	0	1	1	0	EIQNQTLPVDFFAHLR	tr|D6RF21|D6RF21_HUMAN Isoform of Q9UBK8, Methionine synthase reductase OS=Homo sapiens OX=9606 GN=MTRR PE=1 SV=1;tr|D6RGC7|D6RGC7_HUMAN Isoform of Q9UBK8, Methionine synthase reductase (Fragment) OS=Homo sapiens OX=9606 GN=MTRR PE=1 SV=1;tr|H0Y963|H0Y963_	3655	NaN
578	D6RBB0;O60683;O60683-2	D6RBB0;O60683;O60683-2	Peroxisome biogenesis factor 10	PEX10	NaN	NaN	NaN	NaN	NaN	551670	NaN	NaN	NaN	3	1	1	1	3.7	3.7	3.7	36.869	1	-2	7723300	551670	14	1	0	0	1	0	0	7723300	0	0	3.7	0	0	1	0	0	1	0	0	1	GLSHRRASLEER	tr|D6RBB0|D6RBB0_HUMAN Isoform of O60683, Peroxisome biogenesis factor 10 OS=Homo sapiens OX=9606 GN=PEX10 PE=1 SV=1;sp|O60683|PEX10_HUMAN Peroxisome biogenesis factor 10 OS=Homo sapiens OX=9606 GN=PEX10 PE=1 SV=1;sp|O60683-2|PEX10_HUMAN Isoform of O60683,	6024	NaN
579	D6RBW1;P06730;P06730-3;P06730-2;H0Y8J7;D6RFJ3;D6RHE2;H0Y8X3;A6NMX2	D6RBW1;P06730;P06730-3;P06730-2;H0Y8J7	Eukaryotic translation initiation factor 4E	EIF4E	36173000	32234000	32943000	11403000	5045600	1937500	NaN	NaN	NaN	9	8	8	8	32.7	32.7	32.7	28.512	0	23.597	220640000	18386000	12	15	5	6	4	136840000	60547000	23250000	25.3	29.4	15.1	6	7	4	6	7	4	6	7	4	DGIEPMWEDEK;EAVTHIGR;IAIWTTECENR;IVIGYQSHADTATK;TESNQEVANPEHYIK;TWQANLR;WALWFFK;WLITLNK	tr|D6RBW1|D6RBW1_HUMAN Isoform of P06730, Eukaryotic translation initiation factor 4E OS=Homo sapiens OX=9606 GN=EIF4E PE=1 SV=1;sp|P06730|IF4E_HUMAN Eukaryotic translation initiation factor 4E OS=Homo sapiens OX=9606 GN=EIF4E PE=1 SV=2;sp|P06730-3|IF4E_HU	2261;3244;7052;8365;15309;16227;17980;18030	NaN;NaN;NaN;NaN;NaN;NaN;NaN;NaN
580	J3QSY4;D6RC52;D6RCB9;Q9NX24	J3QSY4;D6RC52;D6RCB9;Q9NX24	H/ACA ribonucleoprotein complex subunit 2	NHP2	NaN	NaN	NaN	4811200	NaN	3131100	NaN	NaN	NaN	4	1	1	1	21.1	21.1	21.1	10.071	0.0061751	1.9658	23827000	7942300	3	2	1	0	1	14433000	0	9393400	21.1	0	21.1	1	0	1	1	0	1	1	0	1	TYQELLVNQNPIAQPLASR	tr|J3QSY4|J3QSY4_HUMAN Isoform of Q9NX24, H/ACA ribonucleoprotein complex subunit 2 OS=Homo sapiens OX=9606 GN=NHP2 PE=1 SV=1;tr|D6RC52|D6RC52_HUMAN Isoform of Q9NX24, H/ACA ribonucleoprotein complex subunit 2 (Fragment) OS=Homo sapiens OX=9606 GN=NHP2 PE=	16254	NaN
581	D6RC71;D6RF48;Q9P2W9	D6RC71;D6RF48;Q9P2W9	Syntaxin-18	STX18	3239900	2068200	NaN	297290	85635	58383	NaN	NaN	NaN	3	2	2	2	7.7	7.7	7.7	19.691	0.00045434	3.6359	8630200	382930	11	5	2	2	1	6169600	1818400	642220	7.7	7.7	7.7	2	2	1	2	2	1	2	2	1	TAVLDFIEDYLK;TAVLDFIEDYLKR	tr|D6RC71|D6RC71_HUMAN Isoform of Q9P2W9, Syntaxin-18 (Fragment) OS=Homo sapiens OX=9606 GN=STX18 PE=1 SV=1;tr|D6RF48|D6RF48_HUMAN Isoform of Q9P2W9, Syntaxin-18 OS=Homo sapiens OX=9606 GN=STX18 PE=1 SV=1;sp|Q9P2W9|STX18_HUMAN Syntaxin-18 OS=Homo sapiens O	15161;15162	NaN;NaN
582	D6RCD0;Q8NBQ5	D6RCD0;Q8NBQ5	Estradiol 17-beta-dehydrogenase 11	HSD17B11	NaN	NaN	NaN	1178300	669990	367040	NaN	NaN	NaN	2	3	3	3	15.2	15.2	15.2	28.102	0	4.3542	37559000	2215300	16	4	2	1	1	18853000	10720000	7985800	9.4	3.1	9	2	1	2	2	1	2	2	1	2	LVLWDINK;MIFIPSSIAFLTTLER;TLTDELAALQITGVK	tr|D6RCD0|D6RCD0_HUMAN Isoform of Q8NBQ5, Estradiol 17-beta-dehydrogenase 11 OS=Homo sapiens OX=9606 GN=HSD17B11 PE=1 SV=2;sp|Q8NBQ5|DHB11_HUMAN Estradiol 17-beta-dehydrogenase 11 OS=Homo sapiens OX=9606 GN=HSD17B11 PE=1 SV=3	11171;11567;15759	NaN;NaN;NaN
583	D6RCF4;Q8N5K1	D6RCF4;Q8N5K1	CDGSH iron-sulfur domain-containing protein 2	CISD2	NaN	NaN	NaN	2190600	1388300	1223200	NaN	NaN	NaN	2	1	1	1	9.7	9.7	9.7	16.074	0	4.6378	33615000	4802100	7	3	1	1	1	15334000	9718100	8562200	9.7	9.7	9.7	1	1	1	1	1	1	1	1	1	VVNEINIEDLCLTK	tr|D6RCF4|D6RCF4_HUMAN Isoform of Q8N5K1, CDGSH iron-sulfur domain-containing protein 2 OS=Homo sapiens OX=9606 GN=CISD2 PE=1 SV=1;sp|Q8N5K1|CISD2_HUMAN CDGSH iron-sulfur domain-containing protein 2 OS=Homo sapiens OX=9606 GN=CISD2 PE=1 SV=1	17861	NaN
584	D6REE7;O75116;C9JFJ0;A0A0U1RQV4;E9PF63;Q13464	D6REE7;O75116;C9JFJ0;A0A0U1RQV4;E9PF63;Q13464	Rho-associated protein kinase 2;Rho-associated protein kinase 1	ROCK2;ROCK1	NaN	NaN	NaN	712380	334720	240490	NaN	NaN	NaN	6	2	2	2	4	4	4	50.727	0	4.5318	29615000	1287600	23	3	1	1	1	16385000	7698600	5531300	4	2.2	2.2	2	1	1	2	1	1	2	1	1	NIDNFLNR;NLICAFLTDR	tr|D6REE7|D6REE7_HUMAN Isoform of O75116, Rho-associated protein kinase 2 OS=Homo sapiens OX=9606 GN=ROCK2 PE=1 SV=1;sp|O75116|ROCK2_HUMAN Rho-associated protein kinase 2 OS=Homo sapiens OX=9606 GN=ROCK2 PE=1 SV=4;tr|C9JFJ0|C9JFJ0_HUMAN Isoform of O75116,	12128;12256	NaN;NaN
585	D6REK3;Q6UX04-2;Q6UX04	D6REK3;Q6UX04-2;Q6UX04	Peptidyl-prolyl cis-trans isomerase CWC27 homolog	CWC27	NaN	NaN	NaN	456020	160890	108080	NaN	NaN	NaN	3	2	2	2	11.3	11.3	11.3	42.996	0	5.0449	13050000	268970	18	3	1	1	1	8208400	2896000	1945400	7.3	3.9	3.9	1	1	1	1	1	1	1	1	1	SCEVLFNPFDDIIPR;VVPGFIVQGGDPTGTGSGGESIYGAPFK	tr|D6REK3|D6REK3_HUMAN Isoform of Q6UX04, Spliceosome-associated protein CWC27 homolog OS=Homo sapiens OX=9606 GN=CWC27 PE=1 SV=1;sp|Q6UX04-2|CWC27_HUMAN Isoform of Q6UX04, Isoform 2 of Spliceosome-associated protein CWC27 homolog OS=Homo sapiens OX=9606 G	13879;17867	NaN;NaN
586	D6RGI3;D6RER5;Q9NVA2;D6RDU5;Q9NVA2-2;B1AMS2;Q92599-3;Q14141-2;Q14141-4;Q14141;Q14141-3;D6RDP1;C9JV02;D6R9Y6;H0Y961	D6RGI3;D6RER5;Q9NVA2;D6RDU5;Q9NVA2-2;B1AMS2;Q92599-3;Q14141-2;Q14141-4;Q14141	Septin-11;Septin-8;Septin-6	SEPT11;SEPT6;SEPT8	23008000	39883000	42768000	2777300	1900900	2534600	NaN	NaN	NaN	15	6	5	3	15.8	11.3	7.8	49.005	0	19.577	151470000	7212900	21	11	3	3	5	58324000	39918000	53227000	12.2	12.2	11.3	4	4	5	3	3	5	3	3	3	AVAVGRPSNEELR;QYPWGVVQVENENHCDFVK;SLDLVTMK;SLFNYHDTR;STLMDTLFNTK;VNMEDLR	tr|D6RGI3|D6RGI3_HUMAN Isoform of Q9NVA2, Septin 11, isoform CRA_b OS=Homo sapiens OX=9606 GN=SEPT11 PE=1 SV=1;tr|D6RER5|D6RER5_HUMAN Isoform of Q9NVA2, Septin-11 OS=Homo sapiens OX=9606 GN=SEPT11 PE=1 SV=1;sp|Q9NVA2|SEP11_HUMAN Septin-11 OS=Homo sapiens O	1553;13398;14393;14422;14889;17371	NaN;NaN;NaN;NaN;NaN;NaN
587	O94979-3;O94979-8;O94979;O94979-2;O94979-9;O94979-4;O94979-10;D6RHZ5;O94979-6;O94979-5;D6REX3;H0Y9K1;O94979-7;H7BXG7;H0Y8V7;H0YAB3;D6RHE8;D6RBT0;H0Y9T9;D6RCQ9;D6RE64	O94979-3;O94979-8;O94979;O94979-2;O94979-9;O94979-4;O94979-10;D6RHZ5;O94979-6;O94979-5;D6REX3;H0Y9K1;O94979-7;H7BXG7;H0Y8V7;H0YAB3	Protein transport protein Sec31A	SEC31A	NaN	NaN	NaN	208550	281630	213640	NaN	NaN	NaN	21	3	3	3	2	2	2	121.65	0.00045893	3.7056	33080000	703820	47	4	1	1	2	9801900	13237000	10041000	0.6	1.4	1.3	1	2	2	1	2	2	1	2	2	LIWGPYK;NVWSFLK;YLELLGYR	sp|O94979-3|SC31A_HUMAN Isoform of O94979, Isoform 3 of Protein transport protein Sec31A OS=Homo sapiens OX=9606 GN=SEC31A;sp|O94979-8|SC31A_HUMAN Isoform of O94979, Isoform 8 of Protein transport protein Sec31A OS=Homo sapiens OX=9606 GN=SEC31A;sp|O94979|	9940;12654;18421	NaN;NaN;NaN
588	D6REZ7;Q14994-4;Q14994-7;Q14994-3;Q14994-5;Q14994-6;Q14994-2;Q14994;Q14994-8	D6REZ7;Q14994-4;Q14994-7;Q14994-3;Q14994-5;Q14994-6;Q14994-2;Q14994;Q14994-8	Nuclear receptor subfamily 1 group I member 3	NR1I3	NaN	NaN	NaN	NaN	NaN	187110	NaN	NaN	NaN	9	1	1	1	3.3	3.3	3.3	31.371	0.0029685	2.1646	2432400	187110	13	1	0	0	1	0	0	2432400	0	0	3.3	0	0	1	0	0	1	0	0	1	LLGLLAELR	tr|D6REZ7|D6REZ7_HUMAN Isoform of Q14994, Nuclear receptor subfamily 1 group I member 3 OS=Homo sapiens OX=9606 GN=NR1I3 PE=3 SV=1;sp|Q14994-4|NR1I3_HUMAN Isoform of Q14994, Isoform 4 of Nuclear receptor subfamily 1 group I member 3 OS=Homo sapiens OX=9606	10127	NaN
589	D6RFW1;Q96EQ0	D6RFW1;Q96EQ0	Small glutamine-rich tetratricopeptide repeat-containing protein beta	SGTB	NaN	NaN	NaN	NaN	194950	191340	NaN	NaN	NaN	2	1	1	1	12.3	12.3	12.3	21.83	0.00083403	2.9152	4249100	386280	11	2	0	1	1	0	2144400	2104700	0	12.3	12.3	0	1	1	0	1	1	0	1	1	ISPEDTHLAVSQPLTEMFTSSFCK	tr|D6RFW1|D6RFW1_HUMAN Isoform of Q96EQ0, Small glutamine-rich tetratricopeptide repeat-containing protein beta (Fragment) OS=Homo sapiens OX=9606 GN=SGTB PE=1 SV=1;sp|Q96EQ0|SGTB_HUMAN Small glutamine-rich tetratricopeptide repeat-containing protein beta	8193	NaN
590	D6RIE3;D6RGV5;H0UI06;P14406;D6R9C3	D6RIE3;D6RGV5;H0UI06;P14406;D6R9C3	Cytochrome c oxidase subunit 7A2, mitochondrial	COX7A2	77252000	85512000	NaN	23222000	12426000	4519500	NaN	NaN	NaN	5	2	2	2	25.3	25.3	25.3	10.264	0	6.7109	200840000	40168000	5	5	2	2	1	116110000	62131000	22597000	25.3	25.3	14.3	2	2	1	2	2	1	2	2	1	GGVADALLYR;LFQEDDEIPLYLK	tr|D6RIE3|D6RIE3_HUMAN Isoform of P14406, Cytochrome c oxidase subunit 7A2, mitochondrial OS=Homo sapiens OX=9606 GN=COX7A2 PE=1 SV=1;tr|D6RGV5|D6RGV5_HUMAN Isoform of P14406, Cytochrome c oxidase subunit 7A2, mitochondrial (Fragment) OS=Homo sapiens OX=96	5737;9554	NaN;NaN
591	D6RIW8;Q9NW82	D6RIW8;Q9NW82	WD repeat-containing protein 70	WDR70	NaN	NaN	NaN	NaN	NaN	80392	NaN	NaN	NaN	2	1	1	1	3.1	3.1	3.1	43.24	0.0022667	2.2881	1447100	80392	18	0	0	0	0	0	0	1447100	0	0	3.1	0	0	1	0	0	1	0	0	1	TFDLEAMFEQTR	tr|D6RIW8|D6RIW8_HUMAN Isoform of Q9NW82, WD repeat-containing protein 70 OS=Homo sapiens OX=9606 GN=WDR70 PE=1 SV=1;sp|Q9NW82|WDR70_HUMAN WD repeat-containing protein 70 OS=Homo sapiens OX=9606 GN=WDR70 PE=1 SV=1	15327	NaN
592	D6RJD1;P09497-2;P09497	D6RJD1;P09497-2;P09497	Clathrin light chain B	CLTB	NaN	NaN	NaN	3314100	NaN	NaN	NaN	NaN	NaN	3	2	2	2	13.6	13.6	13.6	13.078	0	4.5993	9942200	3314100	3	3	2	1	0	9942200	0	0	13.6	8	0	2	1	0	2	1	0	2	1	0	SVLMSLK;VAQLCDFNPK	tr|D6RJD1|D6RJD1_HUMAN Isoform of P09497, Clathrin light chain (Fragment) OS=Homo sapiens OX=9606 GN=CLTB PE=1 SV=1;sp|P09497-2|CLCB_HUMAN Isoform of P09497, Isoform Non-brain of Clathrin light chain B OS=Homo sapiens OX=9606 GN=CLTB;sp|P09497|CLCB_HUMAN C	14979;16368	NaN;NaN
593	D6RJG9;Q9Y5W7-2;Q9Y5W7-3;Q9Y5W7-4;Q9Y5W7	D6RJG9;Q9Y5W7-2;Q9Y5W7-3;Q9Y5W7-4;Q9Y5W7	Sorting nexin-14	SNX14	NaN	NaN	NaN	NaN	92247	NaN	NaN	NaN	NaN	5	1	1	1	1.9	1.9	1.9	97.125	1	-2	3782100	92247	41	0	0	0	0	0	3782100	0	0	1.9	0	0	1	0	0	1	0	0	1	0	LTEFHGAFPDAQLPSK	tr|D6RJG9|D6RJG9_HUMAN Isoform of Q9Y5W7, Sorting nexin-14 (Fragment) OS=Homo sapiens OX=9606 GN=SNX14 PE=1 SV=1;sp|Q9Y5W7-2|SNX14_HUMAN Isoform of Q9Y5W7, Isoform 2 of Sorting nexin-14 OS=Homo sapiens OX=9606 GN=SNX14;sp|Q9Y5W7-3|SNX14_HUMAN Isoform of Q9	10944	NaN
594	E2QRG8;Q00765	E2QRG8;Q00765	Receptor expression-enhancing protein;Receptor expression-enhancing protein 5	REEP5	NaN	NaN	NaN	NaN	NaN	867840	NaN	NaN	NaN	2	1	1	1	6.1	6.1	6.1	18.121	0.00045558	3.6603	4339200	867840	5	1	0	0	1	0	0	4339200	0	0	6.1	0	0	1	0	0	1	0	0	1	HESQMDSVVK	tr|E2QRG8|E2QRG8_HUMAN Isoform of Q00765, Receptor expression-enhancing protein (Fragment) OS=Homo sapiens OX=9606 GN=REEP5 PE=1 SV=1;sp|Q00765|REEP5_HUMAN Receptor expression-enhancing protein 5 OS=Homo sapiens OX=9606 GN=REEP5 PE=1 SV=3	6632	NaN
595	E5RFU6;E7EQI7;Q12768	E5RFU6;E7EQI7;Q12768	WASH complex subunit strumpellin	KIAA0196	NaN	NaN	NaN	NaN	NaN	139210	NaN	NaN	NaN	3	1	1	1	8.6	8.6	8.6	18.801	0.0015656	2.4798	1252900	139210	9	1	0	0	1	0	0	1252900	0	0	8.6	0	0	1	0	0	1	0	0	1	VPINESFISMVIGR	tr|E5RFU6|E5RFU6_HUMAN Isoform of Q12768, WASH complex subunit 5 (Fragment) OS=Homo sapiens OX=9606 GN=WASHC5 PE=1 SV=8;tr|E7EQI7|E7EQI7_HUMAN Isoform of Q12768, WASH complex subunit 5 OS=Homo sapiens OX=9606 GN=WASHC5 PE=1 SV=1;sp|Q12768|WASC5_HUMAN WASH	17433	NaN
596	E5RFX7;E5RG77;O94903;H0YBG2	E5RFX7;E5RG77;O94903;H0YBG2	Proline synthase co-transcribed bacterial homolog protein	PROSC	NaN	NaN	NaN	1169600	835770	686440	NaN	NaN	NaN	4	3	3	3	28.5	28.5	28.5	15.34	0	5.9781	24226000	2691800	9	3	0	1	2	10526000	7521900	6178000	6.6	9.5	21.9	1	1	2	1	1	2	1	1	2	ILSLCPEIK;LMAVPNLFMLETVDSVK;TFGENYVQELLEK	tr|E5RFX7|E5RFX7_HUMAN Isoform of O94903, Pyridoxal phosphate homeostasis protein (Fragment) OS=Homo sapiens OX=9606 GN=PLPBP PE=1 SV=1;tr|E5RG77|E5RG77_HUMAN Isoform of O94903, Pyridoxal phosphate homeostasis protein (Fragment) OS=Homo sapiens OX=9606 GN=	7850;10338;15344	NaN;NaN;NaN
597	E5RGN3;E5RIM7;O00244	E5RGN3;E5RIM7;O00244	Copper transport protein ATOX1	ATOX1	NaN	NaN	NaN	NaN	1480800	5210600	NaN	NaN	NaN	3	3	3	3	44.1	44.1	44.1	6.3304	0	5.2289	32216000	5210600	4	2	0	1	1	0	5923200	26293000	0	30.5	42.4	0	1	2	0	1	2	0	1	2	TVSYLGLE;VCIESEHSMDTLLATLK;VCIESEHSMDTLLATLKK	tr|E5RGN3|E5RGN3_HUMAN Isoform of O00244, Copper transport protein ATOX1 OS=Homo sapiens OX=9606 GN=ATOX1 PE=1 SV=1;tr|E5RIM7|E5RIM7_HUMAN Isoform of O00244, Copper transport protein ATOX1 OS=Homo sapiens OX=9606 GN=ATOX1 PE=1 SV=1;sp|O00244|ATOX1_HUMAN Co	16198;16426;16427	NaN;NaN;NaN
598	O60925;E5RGS4;D6RGG5	O60925;E5RGS4	Prefoldin subunit 1	PFDN1	29961000	34914000	35289000	8295700	4101000	4767600	NaN	NaN	NaN	3	5	5	5	36.9	36.9	36.9	14.21	0	14.047	137310000	17164000	8	10	4	2	4	66366000	32808000	38141000	27.9	23.8	31.1	4	3	4	4	3	4	4	3	4	AAPVDLELK;AFTELQAK;EAIHSQLLEK;LADIQIEQLNR;MFILQSK	sp|O60925|PFD1_HUMAN Prefoldin subunit 1 OS=Homo sapiens OX=9606 GN=PFDN1 PE=1 SV=2;tr|E5RGS4|E5RGS4_HUMAN Isoform of O60925, Prefoldin subunit 1 OS=Homo sapiens OX=9606 GN=PFDN1 PE=1 SV=1	147;527;3161;8992;11506	NaN;NaN;NaN;NaN;NaN
599	E5RGS9;Q9NRG0	E5RGS9;Q9NRG0	Chromatin accessibility complex protein 1	CHRAC1	NaN	NaN	NaN	6580700	1063700	2062500	NaN	NaN	NaN	2	2	2	2	46.4	46.4	46.4	6.2643	0	5.4088	38828000	9707000	4	4	2	1	1	26323000	4254800	8250100	46.4	32.1	14.3	2	1	1	2	1	1	2	1	1	LISLPLSR;SSPEVSSINQEALVLTAK	tr|E5RGS9|E5RGS9_HUMAN Isoform of Q9NRG0, Chromatin accessibility complex protein 1 OS=Homo sapiens OX=9606 GN=CHRAC1 PE=1 SV=1;sp|Q9NRG0|CHRC1_HUMAN Chromatin accessibility complex protein 1 OS=Homo sapiens OX=9606 GN=CHRAC1 PE=1 SV=1	9918;14829	NaN;NaN
600	E5RGX5;Q93045;Q93045-2	E5RGX5;Q93045;Q93045-2	Stathmin;Stathmin-2	STMN2	NaN	NaN	NaN	7768300	NaN	NaN	NaN	NaN	NaN	3	4	1	1	16.1	6	6	19.574	0.0022848	2.3161	77683000	7768300	10	1	1	0	0	77683000	0	0	11.9	10.1	10.1	3	3	2	1	0	0	1	0	0	ALEENNNFSK;DLSLEEIQK;DLSLEEIQKK;KLEAAEER	tr|E5RGX5|E5RGX5_HUMAN Isoform of Q93045, Stathmin OS=Homo sapiens OX=9606 GN=STMN2 PE=1 SV=1;sp|Q93045|STMN2_HUMAN Stathmin-2 OS=Homo sapiens OX=9606 GN=STMN2 PE=1 SV=3;sp|Q93045-2|STMN2_HUMAN Isoform of Q93045, Isoform 2 of Stathmin-2 OS=Homo sapiens OX=	883;2638;2639;8752	NaN;NaN;NaN;NaN
601	E5RH41;P29084	E5RH41;P29084	Transcription initiation factor IIE subunit beta	GTF2E2	NaN	NaN	NaN	62439	NaN	NaN	NaN	NaN	NaN	2	1	1	1	9.6	9.6	9.6	22.139	0.00043122	3.1962	1605600	62439	12	2	2	0	0	1605600	0	0	9.6	0	0	1	0	0	1	0	0	1	0	0	GLGGILLEDIEEALPNSQK	tr|E5RH41|E5RH41_HUMAN Isoform of P29084, Transcription initiation factor IIE subunit beta (Fragment) OS=Homo sapiens OX=9606 GN=GTF2E2 PE=1 SV=1;sp|P29084|T2EB_HUMAN Transcription initiation factor IIE subunit beta OS=Homo sapiens OX=9606 GN=GTF2E2 PE=1 S	5952	NaN
602	E5RHG8;Q15369;Q15369-2;R4GMY8	E5RHG8;Q15369;Q15369-2;R4GMY8	Transcription elongation factor B polypeptide 1	TCEB1	62019000	63394000	65882000	16674000	8538800	10121000	NaN	NaN	NaN	4	6	6	6	73	73	73	9.9601	0	60.888	353960000	35334000	7	16	4	6	6	182160000	80334000	91466000	56.2	57.3	73	4	5	6	4	5	6	4	5	6	AMLSGPGQFAENETNEVNFR;EHALTSGTIK;LISSDGHEFIVK;REHALTSGTIK;TYGGCEGPDAMYVK;VCMYFTYK	tr|E5RHG8|E5RHG8_HUMAN Isoform of Q15369, Elongin-C (Fragment) OS=Homo sapiens OX=9606 GN=ELOC PE=1 SV=1;sp|Q15369|ELOC_HUMAN Elongin-C OS=Homo sapiens OX=9606 GN=ELOC PE=1 SV=1;sp|Q15369-2|ELOC_HUMAN Isoform of Q15369, Isoform 2 of Elongin-C OS=Homo sapie	1117;3576;9922;13471;16243;16430	NaN;NaN;NaN;NaN;NaN;NaN
603	E5RHX8;Q9NPA8-2;Q9NPA8	E5RHX8;Q9NPA8-2;Q9NPA8	Transcription and mRNA export factor ENY2	ENY2	NaN	NaN	NaN	3361500	NaN	2048300	NaN	NaN	NaN	3	1	1	1	17	17	17	11.315	0.00044014	3.3577	27049000	5409800	5	2	1	0	1	16808000	0	10241000	17	0	17	1	0	1	1	0	1	1	0	1	GLEHVTVDDLVAEITPK	tr|E5RHX8|E5RHX8_HUMAN Isoform of Q9NPA8, Transcription and mRNA export factor ENY2 OS=Homo sapiens OX=9606 GN=ENY2 PE=1 SV=1;sp|Q9NPA8-2|ENY2_HUMAN Isoform of Q9NPA8, Isoform 2 of Transcription and mRNA export factor ENY2 OS=Homo sapiens OX=9606 GN=ENY2;s	5926	NaN
604	E5RI99;P62888;A0A0B4J213;E5RJH3;A0A0C4DH44	E5RI99;P62888;A0A0B4J213	60S ribosomal protein L30	RPL30	262830000	297510000	290760000	102200000	52410000	48522000	NaN	NaN	NaN	5	4	4	4	50.9	50.9	50.9	12.656	0	75.186	1313800000	203130000	6	20	7	7	6	652880000	345210000	315710000	50.9	50.9	50.9	4	4	4	4	4	4	4	4	4	LVILANNCPALR;SEIEYYAMLAK;TGVHHYSGNNIELGTACGK;VCTLAIIDPGDSDIIR	tr|E5RI99|E5RI99_HUMAN Isoform of P62888, 60S ribosomal protein L30 (Fragment) OS=Homo sapiens OX=9606 GN=RPL30 PE=1 SV=1;sp|P62888|RL30_HUMAN 60S ribosomal protein L30 OS=Homo sapiens OX=9606 GN=RPL30 PE=1 SV=2;tr|A0A0B4J213|A0A0B4J213_HUMAN Isoform of P6	11146;14007;15466;16436	NaN;NaN;NaN;NaN
605	E5RIH5;Q6NXR4	E5RIH5;Q6NXR4	TELO2-interacting protein 2	TTI2	NaN	NaN	NaN	NaN	NaN	613370	NaN	NaN	NaN	2	1	1	1	1.7	1.7	1.7	53.305	1	-2	14108000	613370	23	0	0	0	0	0	0	14108000	0	0	1.7	0	0	1	0	0	1	0	0	1	NLPAFVNR	tr|E5RIH5|E5RIH5_HUMAN Isoform of Q6NXR4, TELO2-interacting protein 2 OS=Homo sapiens OX=9606 GN=TTI2 PE=1 SV=1;sp|Q6NXR4|TTI2_HUMAN TELO2-interacting protein 2 OS=Homo sapiens OX=9606 GN=TTI2 PE=1 SV=1	12288	NaN
606	E5RJI3;E5RIU9;Q8WUX9-2;Q8WUX9	E5RJI3;E5RIU9;Q8WUX9-2;Q8WUX9	Charged multivesicular body protein 7	CHMP7	NaN	NaN	NaN	112330	NaN	NaN	NaN	NaN	NaN	4	1	1	1	10.8	10.8	10.8	17.812	0.0022788	2.3048	1011000	112330	9	1	1	0	0	1011000	0	0	10.8	0	0	1	0	0	1	0	0	1	0	0	KGSVPLGLATVLQDLLR	tr|E5RJI3|E5RJI3_HUMAN Isoform of Q8WUX9, Charged multivesicular body protein 7 OS=Homo sapiens OX=9606 GN=CHMP7 PE=1 SV=1;tr|E5RIU9|E5RIU9_HUMAN Isoform of Q8WUX9, Charged multivesicular body protein 7 (Fragment) OS=Homo sapiens OX=9606 GN=CHMP7 PE=1 SV=1	8694	NaN
607	E5RIV7;Q8IV48	E5RIV7;Q8IV48	3-5 exoribonuclease 1	ERI1	NaN	NaN	NaN	NaN	1140000	832100	NaN	NaN	NaN	2	1	1	1	15.2	15.2	15.2	10.993	0.00044683	3.4673	13804000	1972100	7	2	0	1	1	0	7979700	5824700	0	15.2	15.2	0	1	1	0	1	1	0	1	1	FITSSASDFSDPVYK	tr|E5RIV7|E5RIV7_HUMAN Isoform of Q8IV48, 3-5 exoribonuclease 1 OS=Homo sapiens OX=9606 GN=ERI1 PE=1 SV=1;sp|Q8IV48|ERI1_HUMAN 3-5 exoribonuclease 1 OS=Homo sapiens OX=9606 GN=ERI1 PE=1 SV=3	4789	NaN
608	E5RIW3;E5RJD8;O75347;E5RHG6;O75347-2;E5RIX8	E5RIW3;E5RJD8;O75347;E5RHG6;O75347-2	Tubulin-specific chaperone A	TBCA	57703000	46652000	45602000	25975000	8992300	8269900	NaN	NaN	NaN	6	6	6	6	58.3	58.3	58.3	10.08	0	31.98	447840000	43238000	6	18	7	6	5	277210000	98759000	71877000	58.3	57.1	45.2	5	5	4	5	5	4	5	5	4	AEDGENYDIK;AEDGENYDIKK;ILENEKDLEEAEEYKEAR;LEAAYLDLQR;QAEILQESR;RLEAAYLDLQR	tr|E5RIW3|E5RIW3_HUMAN Isoform of O75347, Tubulin-specific chaperone A OS=Homo sapiens OX=9606 GN=TBCA PE=1 SV=1;tr|E5RJD8|E5RJD8_HUMAN Isoform of O75347, Tubulin-specific chaperone A OS=Homo sapiens OX=9606 GN=TBCA PE=1 SV=1;sp|O75347|TBCA_HUMAN Tubulin-s	358;359;7728;9315;12825;13599	NaN;NaN;NaN;NaN;NaN;NaN
609	Q9P015;E5RIZ4;E5RHF4	Q9P015;E5RIZ4;E5RHF4	39S ribosomal protein L15, mitochondrial	MRPL15	NaN	NaN	NaN	200100	94544	49377	NaN	NaN	NaN	3	2	2	2	9.1	9.1	9.1	33.419	0.0036996	2.144	5848300	94544	17	2	1	0	1	3401700	1607200	839400	6.1	3	6.1	1	1	1	1	1	1	1	1	1	GVTIQPLKR;QIFFGLAPGWVVNMADKK	sp|Q9P015|RM15_HUMAN 39S ribosomal protein L15, mitochondrial OS=Homo sapiens OX=9606 GN=MRPL15 PE=1 SV=1;tr|E5RIZ4|E5RIZ4_HUMAN Isoform of Q9P015, 39S ribosomal protein L15, mitochondrial (Fragment) OS=Homo sapiens OX=9606 GN=MRPL15 PE=1 SV=2;tr|E5RHF4|E5	6462;13028	NaN;NaN
610	E5RJR5;P63208;E7ERH2;F8W8N3;P63208-2;E5RGM3;E5RHM3;E5RGM4	E5RJR5;P63208;E7ERH2;F8W8N3;P63208-2;E5RGM3	S-phase kinase-associated protein 1	SKP1	NaN	55929000	57069000	8699400	3232900	3373600	NaN	NaN	NaN	8	5	5	3	48.5	48.5	20.9	18.72	0	15.774	155410000	15306000	10	8	2	3	3	86994000	33243000	35171000	26.4	29.4	38	3	3	4	3	3	4	2	2	3	GLLDVTCK;LQSSDGEIFEVDVEIAK;NDFTEEEEAQVR;RTDDIPVWDQEFLK;TMLEDLGMDDEGDDDPVPLPNVNAAILK	tr|E5RJR5|E5RJR5_HUMAN Isoform of P63208, S-phase kinase-associated protein 1 OS=Homo sapiens OX=9606 GN=SKP1 PE=1 SV=1;sp|P63208|SKP1_HUMAN S-phase kinase-associated protein 1 OS=Homo sapiens OX=9606 GN=SKP1 PE=1 SV=2;tr|E7ERH2|E7ERH2_HUMAN Isoform of P63	5975;10721;11930;13729;15795	NaN;NaN;NaN;NaN;NaN
611	E5RK69	E5RK69	Annexin	ANXA6	NaN	NaN	NaN	NaN	NaN	NaN	14	1	1	1	14	1	1	34.6	3	3	51.776	0.0015625	2.4753	0	0	28	1	1	0	0	0	0	0	29.6	29.1	29.1	12	11	11	1	0	0	1	0	0	ALIEILATR;DAFVAIVQSVK;EAILDIITSR;EDAQEIADTPSGDK;GFGSDKEAILDIITSR;GLGTDEDTIIDIITHR;GTVRPANDFNPDADAK;ILISLATGHR;MTNYDVEHTIK;SEIDLLNIR;SEISGDLAR;SLEDALSSDTSGHFR;SLHQAIEGDTSGDFLK;SLYSMIK	tr|E5RK69|E5RK69_HUMAN Isoform of P08133, Annexin OS=Homo sapiens OX=9606 GN=ANXA6 PE=1 SV=1	944;1989;3163;3272;5616;5961;6381;7781;11773;14004;14009;14400;14449;14567	NaN;NaN;NaN;NaN;NaN;NaN;NaN;NaN;NaN;NaN;NaN;NaN;NaN;NaN
612	Q7L5N1;E7EM64;H7C3T0	Q7L5N1;E7EM64;H7C3T0	COP9 signalosome complex subunit 6	COPS6	NaN	NaN	NaN	553350	626030	293180	NaN	NaN	NaN	3	4	4	4	16.8	16.8	16.8	36.163	0	7.5987	49757000	1472600	12	5	1	3	1	23857000	16815000	9085100	4.9	11.3	10.4	1	3	2	1	3	2	1	3	2	IGVDHVAR;NIEVMNSFELLSHTVEEK;QVCEIIESPLFLK;SQEGRPVQVIGALIGK	sp|Q7L5N1|CSN6_HUMAN COP9 signalosome complex subunit 6 OS=Homo sapiens OX=9606 GN=COPS6 PE=1 SV=1;tr|E7EM64|E7EM64_HUMAN Isoform of Q7L5N1, COP9 signalosome complex subunit 6 OS=Homo sapiens OX=9606 GN=COPS6 PE=1 SV=1;tr|H7C3T0|H7C3T0_HUMAN Isoform of Q7L	7488;12134;13324;14709	NaN;NaN;NaN;NaN
613	Q9UH65;E7EMB1;E9PJK8	Q9UH65;E7EMB1;E9PJK8	Switch-associated protein 70	SWAP70	NaN	NaN	NaN	1088000	NaN	NaN	NaN	NaN	NaN	3	2	2	2	3.4	3.4	3.4	68.997	0.0022607	2.2645	41342000	1088000	38	2	2	0	0	41342000	0	0	3.4	0	0	2	0	0	2	0	0	2	0	0	VAHHEGLIR;VLSHNLCTVLK	sp|Q9UH65|SWP70_HUMAN Switch-associated protein 70 OS=Homo sapiens OX=9606 GN=SWAP70 PE=1 SV=1;tr|E7EMB1|E7EMB1_HUMAN Isoform of Q9UH65, Switch-associated protein 70 OS=Homo sapiens OX=9606 GN=SWAP70 PE=1 SV=1;tr|E9PJK8|E9PJK8_HUMAN Isoform of Q9UH65, Swit	16321;17234	NaN;NaN
614	E7EMN6;Q6NXS1;P41236	E7EMN6;Q6NXS1;P41236	Protein phosphatase inhibitor 2-like protein 3;Protein phosphatase inhibitor 2	PPP1R2;PPP1R2P3	NaN	NaN	NaN	NaN	823640	625830	NaN	NaN	NaN	3	1	1	1	5.9	5.9	5.9	19.245	0.0022616	2.2656	11596000	1449500	8	2	0	1	1	0	6589100	5006700	0	5.9	5.9	0	1	1	0	1	1	0	1	1	LHYNEGLNIK	tr|E7EMN6|E7EMN6_HUMAN Isoform of P41236, Protein phosphatase inhibitor 2 (Fragment) OS=Homo sapiens OX=9606 GN=PPP1R2 PE=1 SV=1;sp|Q6NXS1|IPP2B_HUMAN Protein phosphatase inhibitor 2 family member B OS=Homo sapiens OX=9606 GN=PPP1R2B PE=1 SV=2;sp|P41236|IP	9820	NaN
615	J3KMY5;H0YIZ1;G3V3E8;E7EMS2;G3V3D1;P61916;G3V2V8;P61916-2	J3KMY5;H0YIZ1;G3V3E8;E7EMS2;G3V3D1;P61916;G3V2V8;P61916-2	Epididymal secretory protein E1	NPC2	NaN	10977000	11274000	1446600	381950	924620	NaN	NaN	NaN	8	3	3	3	31.1	31.1	31.1	16.23	0	7.2547	36132000	1306600	10	9	2	3	4	14466000	8291700	13374000	15.5	20.3	31.1	1	2	3	1	2	3	1	2	3	AVVHGILMGVPVPFPIPEPDGCK;EVNVSPCPTQPCQLSK;SEYPSIK	tr|J3KMY5|J3KMY5_HUMAN Isoform of P61916, NPC intracellular cholesterol transporter 2 OS=Homo sapiens OX=9606 GN=NPC2 PE=1 SV=1;tr|H0YIZ1|H0YIZ1_HUMAN Isoform of P61916, NPC intracellular cholesterol transporter 2 (Fragment) OS=Homo sapiens OX=9606 GN=NPC2	1679;4296;14058	NaN;NaN;NaN
616	E7EN77;Q15021	E7EN77;Q15021	Condensin complex subunit 1	NCAPD2	NaN	NaN	NaN	199920	14929	23945	NaN	NaN	NaN	2	3	3	3	2.8	2.8	2.8	102.65	0.00047916	4.1172	13546000	223870	45	5	2	1	2	11030000	671810	1844300	2.8	2.1	2.1	2	1	2	2	1	2	2	1	2	LLNILGLIFK;LLNILGLIFKGPAASTQEK;VLQLFTR	tr|E7EN77|E7EN77_HUMAN Isoform of Q15021, Condensin complex subunit 1 (Fragment) OS=Homo sapiens OX=9606 GN=NCAPD2 PE=1 SV=2;sp|Q15021|CND1_HUMAN Condensin complex subunit 1 OS=Homo sapiens OX=9606 GN=NCAPD2 PE=1 SV=3	10215;10216;17212	NaN;NaN;NaN
617	F5H3K2;E7ENF1;G5EA44;F5H7W8;Q96C57	F5H3K2;E7ENF1;G5EA44;F5H7W8;Q96C57	Uncharacterized protein C12orf43	C12orf43	NaN	NaN	NaN	233950	NaN	NaN	NaN	NaN	NaN	5	1	1	1	8.5	8.5	8.5	20.499	0.00043346	3.2307	2339500	233950	10	1	1	0	0	2339500	0	0	8.5	0	0	1	0	0	1	0	0	1	0	0	LGALLDSFITISEAAK	tr|F5H3K2|F5H3K2_HUMAN Isoform of Q96C57, Chromosome 12 open reading frame 43 (Fragment) OS=Homo sapiens OX=9606 GN=C12orf43 PE=1 SV=1;tr|E7ENF1|E7ENF1_HUMAN Isoform of Q96C57, Chromosome 12 open reading frame 43 OS=Homo sapiens OX=9606 GN=C12orf43 PE=1 SV	9600	NaN
618	K7EJL1;E7ENJ6;Q9BXS5;Q9BXS5-2;A0A087WZX7;K7ENA7;K7EQX3	K7EJL1;E7ENJ6;Q9BXS5;Q9BXS5-2	AP-1 complex subunit mu-1	AP1M1	NaN	NaN	NaN	636370	460380	453950	NaN	NaN	NaN	7	3	3	3	13.4	13.4	13.4	40.296	0	5.052	47681000	914330	21	2	0	1	1	13364000	14790000	19527000	5.4	8	13.4	1	2	3	1	2	3	1	2	3	LETGAPRPPATVTNAVSWR;LNTHVKPLIWIESVIEK;SASAVYVLDLK	tr|K7EJL1|K7EJL1_HUMAN Isoform of Q9BXS5, AP-1 complex subunit mu-1 OS=Homo sapiens OX=9606 GN=AP1M1 PE=1 SV=1;tr|E7ENJ6|E7ENJ6_HUMAN Isoform of Q9BXS5, AP-1 complex subunit mu-1 OS=Homo sapiens OX=9606 GN=AP1M1 PE=1 SV=1;sp|Q9BXS5|AP1M1_HUMAN AP-1 complex	9455;10458;13850	NaN;NaN;NaN
619	H0Y9H2;E7EV99;E7ENY0;P35611-2;P35611-6;P35611;P35611-3;P35611-4;A0A0A0MSR2;P35611-5	H0Y9H2;E7EV99;E7ENY0;P35611-2;P35611-6;P35611;P35611-3;P35611-4;A0A0A0MSR2;P35611-5	Alpha-adducin	ADD1	NaN	NaN	NaN	1328700	366380	451700	NaN	NaN	NaN	10	4	4	3	12.6	12.6	10.8	48.407	0	9.6517	38642000	2146800	18	3	1	1	1	23916000	6594800	8130700	6.8	4.1	5.9	2	1	2	2	1	2	2	1	1	MLDNLGYR;SLVQGELVTASK;TLASAGGPDNLVLLNPEK;TSTSAVPNLFVPLNTNPK	tr|H0Y9H2|H0Y9H2_HUMAN Isoform of P35611, Alpha-adducin (Fragment) OS=Homo sapiens OX=9606 GN=ADD1 PE=1 SV=1;tr|E7EV99|E7EV99_HUMAN Isoform of P35611, Alpha-adducin OS=Homo sapiens OX=9606 GN=ADD1 PE=1 SV=1;tr|E7ENY0|E7ENY0_HUMAN Isoform of P35611, Alpha-a	11601;14557;15638;16020	NaN;NaN;NaN;NaN
620	E7EP17;Q9NYC9-2;Q9NYC9	E7EP17;Q9NYC9-2;Q9NYC9	Dynein heavy chain 9, axonemal	DNAH9	NaN	NaN	NaN	NaN	10445	NaN	NaN	NaN	NaN	3	1	1	1	0.2	0.2	0.2	503.34	1	-2	2486000	10445	238	0	0	0	0	0	2486000	0	0	0.2	0	0	1	0	0	1	0	0	1	0	KQVAQLK	tr|E7EP17|E7EP17_HUMAN Isoform of Q9NYC9, Dynein heavy chain 9, axonemal OS=Homo sapiens OX=9606 GN=DNAH9 PE=1 SV=1;sp|Q9NYC9-2|DYH9_HUMAN Isoform of Q9NYC9, Isoform 2 of Dynein heavy chain 9, axonemal OS=Homo sapiens OX=9606 GN=DNAH9;sp|Q9NYC9|DYH9_HUMAN	8888	NaN
621	E7EPB3;P50914	E7EPB3;P50914	60S ribosomal protein L14	RPL14	33501000	40169000	NaN	9627600	6831200	7252900	NaN	NaN	NaN	2	4	4	4	36.3	36.3	36.3	14.558	0	10.141	146630000	23712000	6	7	2	2	3	57766000	40987000	47880000	16.9	26.6	27.4	2	3	3	2	3	3	2	3	3	ALVDGPCTQVR;CMQLTDFILK;LVAIVDVIDQNR;VAYVSFGPHAGK	tr|E7EPB3|E7EPB3_HUMAN Isoform of P50914, 60S ribosomal protein L14 OS=Homo sapiens OX=9606 GN=RPL14 PE=1 SV=1;sp|P50914|RL14_HUMAN 60S ribosomal protein L14 OS=Homo sapiens OX=9606 GN=RPL14 PE=1 SV=4	1072;1876;11082;16415	NaN;NaN;NaN;NaN
622	E7ES33;E7EPK1;Q16181-2;Q16181;G3V1Q4;A0A0U1RRE1;A0A0U1RRH9;A0A0U1RRD1;A0A0U1RRM2;Q6ZU15	E7ES33;E7EPK1;Q16181-2;Q16181;G3V1Q4	Septin-7	2007-09-01	66332000	76983000	74878000	8835700	6412100	5219400	NaN	NaN	NaN	10	12	12	12	39.6	39.6	39.6	48.715	0	66.502	594850000	20467000	21	32	13	11	8	317870000	167370000	109610000	36.5	28.5	17.3	11	9	6	11	9	6	11	9	6	ADTLTPEECQQFK;DRLPLAVVGSNTIIEVNGK;DVTNNVHYENYR;FEDYLNAESR;IYEFPETDDEEENKLVK;LAAVTYNGVDNNK;LPLAVVGSNTIIEVNGK;NLEGYVGFANLPNQVYR;QYPWGVAEVENGEHCDFTILR;SPLAQMEEERR;STLINSLFLTDLYSPEYPGPSHR;VNIIPLIAK	tr|E7ES33|E7ES33_HUMAN Isoform of Q16181, Septin-7 OS=Homo sapiens OX=9606 GN=SEPT7 PE=1 SV=3;tr|E7EPK1|E7EPK1_HUMAN Isoform of Q16181, Septin-7 OS=Homo sapiens OX=9606 GN=SEPT7 PE=1 SV=2;sp|Q16181-2|SEPT7_HUMAN Isoform of Q16181, Isoform 2 of Septin-7 OS=	328;2830;3020;4541;8442;8983;10527;12234;13397;14669;14886;17352	NaN;NaN;NaN;NaN;NaN;NaN;NaN;NaN;NaN;NaN;NaN;NaN
623	E7EPT4;P19404	E7EPT4;P19404	NADH dehydrogenase [ubiquinone] flavoprotein 2, mitochondrial	NDUFV2	28004000	33080000	23311000	4912700	2530200	1628000	NaN	NaN	NaN	2	3	3	3	13.5	13.5	13.5	27.907	0	9.4572	126990000	9070900	14	9	3	3	3	68778000	35423000	22792000	13.5	13.5	13.5	3	3	3	3	3	3	3	3	3	AAAVLPVLDLAQR;DIEEIIDELK;NSDSILEAIQK	tr|E7EPT4|E7EPT4_HUMAN Isoform of P19404, NADH dehydrogenase [ubiquinone] flavoprotein 2, mitochondrial OS=Homo sapiens OX=9606 GN=NDUFV2 PE=1 SV=1;sp|P19404|NDUV2_HUMAN NADH dehydrogenase [ubiquinone] flavoprotein 2, mitochondrial OS=Homo sapiens OX=9606	38;2372;12476	NaN;NaN;NaN
624	E7EPW2;P82663-3;P82663-2;P82663	E7EPW2;P82663-3;P82663-2;P82663	28S ribosomal protein S25, mitochondrial	MRPS25	NaN	NaN	NaN	NaN	821050	718070	NaN	NaN	NaN	4	1	1	1	11.8	11.8	11.8	12.946	0.0015564	2.4582	10774000	1539100	7	2	0	1	1	0	5747400	5026500	0	11.8	11.8	0	1	1	0	1	1	0	1	1	TLQYLSQGNVVFK	tr|E7EPW2|E7EPW2_HUMAN Isoform of P82663, 28S ribosomal protein S25, mitochondrial OS=Homo sapiens OX=9606 GN=MRPS25 PE=1 SV=1;sp|P82663-3|RT25_HUMAN Isoform of P82663, Isoform 3 of 28S ribosomal protein S25, mitochondrial OS=Homo sapiens OX=9606 GN=MRPS25	15742	NaN
625	E7EQ29;P16278-2;P16278-3;P16278;C9J4G9	E7EQ29;P16278-2;P16278-3;P16278	Beta-galactosidase	GLB1	NaN	NaN	NaN	526070	935490	407270	NaN	NaN	NaN	5	3	3	3	7.5	7.5	7.5	60.482	0	9.6914	37377000	1868800	20	3	1	1	1	10521000	18710000	8145400	2.6	5.5	4.6	1	2	2	1	2	2	1	2	2	SLYPLTFIQVK;TEAVASSLYDILAR;TVGAALDILCPSGPIK	tr|E7EQ29|E7EQ29_HUMAN Isoform of P16278, Beta-galactosidase OS=Homo sapiens OX=9606 GN=GLB1 PE=1 SV=1;sp|P16278-2|BGAL_HUMAN Isoform of P16278, Isoform 2 of Beta-galactosidase OS=Homo sapiens OX=9606 GN=GLB1;sp|P16278-3|BGAL_HUMAN Isoform of P16278, Isofo	14564;15262;16126	NaN;NaN;NaN
626	F5GX39;E7EQ72;Q15363	F5GX39;E7EQ72;Q15363	Transmembrane emp24 domain-containing protein 2	TMED2	20884000	26093000	31150000	6902300	3078300	3712200	NaN	NaN	NaN	3	3	3	3	32.8	32.8	32.8	13.631	0	10.48	121970000	13693000	7	13	4	4	5	59461000	28518000	33990000	32.8	21.6	32.8	3	2	3	3	2	3	3	2	3	HEQEYMEVR;IVMFTIDIGEAPK;LEEMINELAVAMTAVK	tr|F5GX39|F5GX39_HUMAN Isoform of Q15363, Transmembrane emp24 domain-containing protein 2 OS=Homo sapiens OX=9606 GN=TMED2 PE=1 SV=1;tr|E7EQ72|E7EQ72_HUMAN Isoform of Q15363, Transmembrane emp24 domain-containing protein 2 (Fragment) OS=Homo sapiens OX=960	6629;8382;9356	NaN;NaN;NaN
627	H7C1W2;E9PF84;G5E9Q7;E7EQB8;P51553-2;P51553	H7C1W2;E9PF84;G5E9Q7;E7EQB8;P51553-2;P51553	Isocitrate dehydrogenase [NAD] subunit, mitochondrial;Isocitrate dehydrogenase [NAD] subunit gamma, mitochondrial	IDH3G	NaN	NaN	NaN	NaN	390110	NaN	NaN	NaN	NaN	6	1	1	1	11.6	11.6	11.6	22.384	0.001568	2.4919	5071400	390110	13	1	0	1	0	0	5071400	0	0	11.6	0	0	1	0	0	1	0	0	1	0	ENTEGEYSSLEHESVAGVVESLK	tr|H7C1W2|H7C1W2_HUMAN Isoform of Q76G19, Isocitrate dehydrogenase [NAD] subunit gamma, mitochondrial (Fragment) OS=Homo sapiens OX=9606 GN=IDH3G PE=1 SV=1;tr|E9PF84|E9PF84_HUMAN Isoform of Q76G19, Isocitrate dehydrogenase [NAD] subunit, mitochondrial (Fra	3984	NaN
628	E9PES6;E7ES08;E7EQU1;O15347	E9PES6;E7ES08;E7EQU1;O15347	High mobility group protein B3	HMGB3	49901000	57850000	52879000	19508000	10918000	8768000	NaN	NaN	NaN	4	5	5	5	36.6	36.6	36.6	17.522	0	15.608	299630000	39194000	5	15	5	6	4	151760000	84276000	63587000	36.6	36.6	26.1	4	5	3	4	5	3	4	5	3	KNPEVPVNFAEFSK;LGEMWNNLNDSEK;NPEVPVNFAEFSK;RPPSGFFLFCSEFRPK;STNPGISIGDVAK	tr|E9PES6|E9PES6_HUMAN Isoform of O15347, High mobility group protein B3 (Fragment) OS=Homo sapiens OX=9606 GN=HMGB3 PE=1 SV=1;tr|E7ES08|E7ES08_HUMAN Isoform of O15347, High mobility group protein B3 (Fragment) OS=Homo sapiens OX=9606 GN=HMGB3 PE=1 SV=1;tr	8808;9631;12406;13687;14899	NaN;NaN;NaN;NaN;NaN
629	E7ERK9;Q9UI10-2;A0A087WTA5;Q9UI10-3;Q9UI10	E7ERK9;Q9UI10-2;A0A087WTA5;Q9UI10-3;Q9UI10	Translation initiation factor eIF-2B subunit delta	EIF2B4	NaN	NaN	NaN	273810	62004	NaN	NaN	NaN	NaN	5	2	2	2	4	4	4	59.714	0.00083577	2.9329	8395400	335820	25	0	0	0	0	6845300	1550100	0	2	2	0	1	1	0	1	1	0	1	1	0	PTQQPAAPSTR;VGTAQLALVAR	tr|E7ERK9|E7ERK9_HUMAN Isoform of Q9UI10, Translation initiation factor eIF-2B subunit delta OS=Homo sapiens OX=9606 GN=EIF2B4 PE=1 SV=1;sp|Q9UI10-2|EI2BD_HUMAN Isoform of Q9UI10, Isoform 2 of Translation initiation factor eIF-2B subunit delta OS=Homo sapi	12796;16849	NaN;NaN
630	H0YBP1;E7ESA6;Q05397-2;Q05397-7;Q05397;Q05397-5;E5RHD8;E5RI03;H0YB99;B4DWJ1;E9PEI4;H0YB16;H0YBZ1;Q05397-6;Q05397-4;Q05397-3	H0YBP1;E7ESA6;Q05397-2;Q05397-7;Q05397;Q05397-5;E5RHD8;E5RI03;H0YB99;B4DWJ1;E9PEI4;H0YB16;H0YBZ1;Q05397-6;Q05397-4;Q05397-3	Focal adhesion kinase 1	PTK2	NaN	NaN	NaN	18425	86345	96998	NaN	NaN	NaN	16	2	2	2	2.4	2.4	2.4	115.45	0.0029707	2.1707	11501000	183340	57	0	0	0	0	1050200	4921700	5528900	1.4	1	1	1	1	1	1	1	1	1	1	1	LIQQTFRQFANLNR;NLLDVIDQAR	tr|H0YBP1|H0YBP1_HUMAN Isoform of Q05397, Focal adhesion kinase 1 (Fragment) OS=Homo sapiens OX=9606 GN=PTK2 PE=1 SV=1;tr|E7ESA6|E7ESA6_HUMAN Isoform of Q05397, Focal adhesion kinase 1 OS=Homo sapiens OX=9606 GN=PTK2 PE=1 SV=1;sp|Q05397-2|FAK1_HUMAN Isofor	9909;12270	NaN;NaN
631	E7ESC6;Q9UIA9;H0YBE1;E5RIW1	E7ESC6;Q9UIA9	Exportin-7	XPO7	15336000	14169000	NaN	724190	226750	162920	NaN	NaN	NaN	4	7	7	7	8.7	8.7	8.7	124.07	0	16.84	76403000	1113900	54	7	4	2	1	54690000	12915000	8797600	8.7	5.4	1	7	4	1	7	4	1	7	4	1	DGLEDPLEDTGLVQQQLDQLSTIGR;IDIRNYVLNYLATRPK;ILTLGEVPK;LESVHIILR;LQFDVSSPNGILLFR;TNNPLPLEQR;VLQLMNLTDSR	tr|E7ESC6|E7ESC6_HUMAN Isoform of Q9UIA9, Exportin-7 OS=Homo sapiens OX=9606 GN=XPO7 PE=1 SV=1;sp|Q9UIA9|XPO7_HUMAN Exportin-7 OS=Homo sapiens OX=9606 GN=XPO7 PE=1 SV=3	2265;7169;7858;9452;10635;15833;17215	NaN;NaN;NaN;NaN;NaN;NaN;NaN
632	E7ESI2;G3V5T9;P24941-2;P24941;Q00526;K7EJ83	E7ESI2;G3V5T9;P24941-2;P24941;Q00526;K7EJ83	Cyclin-dependent kinase 2;Cyclin-dependent kinase 3	CDK2;CDK3	NaN	14976000	16115000	809600	356620	294950	NaN	NaN	NaN	6	4	2	2	20.6	12.6	12.6	27.164	0	13.529	35756000	651570	15	5	1	2	2	12144000	11575000	12037000	14.7	16	16	3	3	3	1	2	2	1	2	2	ALFPGDSEIDQLFR;DLKPQNLLINTEGAIK;IGEGTYGVVYK;LADFGLAR	tr|E7ESI2|E7ESI2_HUMAN Isoform of P24941, Cyclin-dependent kinase 2 OS=Homo sapiens OX=9606 GN=CDK2 PE=1 SV=1;tr|G3V5T9|G3V5T9_HUMAN Isoform of P24941, Cyclin-dependent kinase 2, isoform CRA_c OS=Homo sapiens OX=9606 GN=CDK2 PE=1 SV=1;sp|P24941-2|CDK2_HUMA	916;2575;7417;8989	NaN;NaN;NaN;NaN
[truncated: 2,295 more rows]
[truncated: 10 more columns]

## Sheet: 03-Evidence-selected proteins
Sequence	Length	Leading razor protein	Gene names	Protein names	Experiment	MS/MS m/z	Charge	m/z	Mass	Retention time	evidence-ID	Protein group IDs	MS/MS scan number	MS/MS scan numbers	Intensity	Peptide ID	Mod. peptide ID	MS/MS IDs	Best MS/MS	Retention length	Calibrated retention time	Calibrated retention time start	Calibrated retention time finish	Modifications	Modified sequence	Deamidation (NQ) Probabilities	Oxidation (M) Probabilities	Phospho (STY) Probabilities	Deamidation (NQ) Score Diffs	Oxidation (M) Score Diffs	Phospho (STY) Score Diffs	Acetyl (Protein N-term)	Deamidation (NQ)	Oxidation (M)	Phospho (STY)	Missed cleavages	Proteins	Leading proteins	Type	Raw file	Fraction	Uncalibrated - Calibrated m/z [ppm]	Uncalibrated - Calibrated m/z [Da]	Mass error [ppm]	Mass error [Da]	Uncalibrated mass error [ppm]	Uncalibrated mass error [Da]	Max intensity m/z 0	Retention time calibration
[truncated: 310 more rows]
[truncated: 22 more columns]

[truncated: 2 more sheets: 04-peptides-selected proteins, 05-msms-selected proteins]
