# Supplementary material for: A Practical and Analytical Comparative Study of Gel-Based Top-Down and Gel-Free Bottom-Up Proteomics Including Unbiased Proteoform Detection
Source: Cells. 2023 Feb 26;12(5):747. doi: 10.3390/cells12050747 (PMC10000902; doi:10.3390/cells12050747)
Supplement: Supplementary file 1 [file cells-12-00747-s001.zip › Table S4_Phosphatase.xlsx]

## Sheet: 01-2D-DIGE phosphatase data
Masternumber	Accession number (Uniprot)	Gene name	Protein name	pH range of used gels	Isoelectric point (pI)	MW [kDa]
2516	P0DP23	CALM1	Calmodulin-1	4-7	4.09	16.8
2419	Q15185	PTGES3	Prostaglandin E synthase 3	4-7	4.31898	18.7
2085	P24534	EEF1B2	Elongation factor 1-beta	4-7	4.50024	24.7
2579	P60660	MYL6	Myosin light polypeptide 6	4-7	4.55759	16.9
1001	Q13177	PAK2	Serine/threonine-protein kinase PAK 2	4-7	5.69482	58
1632	Q15019	SEPTIN2	Septin-2	4-7	6.14599	41.5
2477	P23528	CFL1	Cofilin-1	4-7	6.3	18.5
3221	P23528	CFL1	Cofilin-1	6-9	6.3	18.5
1866	P37837	TALDO1	Transaldolase	4-7	6.35598	37.5
1643	P05455	SSB	Lupus La protein	6-9	6.67577	46.8
1772	Q14103	HNRNPD	Heterogeneous nuclear ribonucleoprotein D0	6-9	7.61251	38.4
1340	Q01518	CAP1	Adenylyl cyclase-associated protein 1	6-9	8.23544	51.9
754	Q15637	SF1	Splicing factor 1	6-9	9.0738	68.3

## Sheet: 02-Description shotgun
MaxQuant (vers. 2.0.3.0) TimsToF .d folder analysis output of DU145-IS (internal standard) protein lysates untreated (without, -PPAase) or treated (with, +PPAse) in technical replica prepared by two individuals (H, U) at different time-points
sheet 1+2:	MaxQuant Phospho (STY)Sites.txt output table after Perseus filtering and processing (expand site tables and filter with phosphorylation-sites-probability x>0.75)
sheet 1:	phosphopeptides with Intensity (median of 4 samples eiter without (IS-PPAase, H+U) or with (IS+PPAse, H+U)) phosphatase treatment; Bar chart graphs Suppl Figure x ABC
sheet 2:	MaxQuant protein groups-table merged with phospho(STY)-site tables to evaluate LFQ/iBAQ of protein abundance in relation to phosphosite-intensities. Bar chart graphs Suppl Figure y A-D
sheet 3:	phosphopeptides without Intensity
sheet 4:	modification-specific peptides-table filtered for P(STY)
sheet 5:	All proteins commonly identified at least 2 times in analsis -/+ phosphatase
sheet 6:	MaxQuant parameters and summary.txt (overall analysed MS, MS/MS)
	Source data for Venn-Diagramm obtained from Psty-site table

## Sheet: 03-P-peptides with Intensity
Graphs Supplementary figures x, ABCD "Phosphatase"	Ppeptides -/+ L-PPase, Gene names, positions	P-peptide Intensity (median, n=4) w/o ʎ-PPase	P-peptide Intensity (median, n=4) with ʎ-PPase	Intensity ratio -/+ ʎ-PPase		phospho-pos within protein	Gene Symbol	P-peptide Intensity (median, n=4) w/o ʎ-PPase		phospho-pos within protein	Gene Symbol	P-peptide Intensity (median, n=4) with ʎ-PPase		Proteins	Leading proteins	Protein	Protein names	Gene names	Sequence window	Phospho (STY) Probabilities	Positions within proteins	Positions	Gene names, positions	P-peptide Intensity (median, n=4) w/o ʎ-PPase	P-peptide Intensity (median, n=4) with ʎ-PPase	Intensity ratio -/+ ʎ-PPase	Unique identifier	Number of Phospho (STY)	Position in protein	Position in peptide	Amino acid	Charge	Peptide window coverage	Best localization raw file	Protein group IDs	Multiplicity	Localization prob	PEP	Score	Delta score	Score for localization	Mass error [ppm]	Intensity	id	Peptide IDs	Mod. peptide IDs	Diagnostic peak
	GDI1_(205)	65360	77731.5	0.840843		5752	AHNAK	17386		70	PLAUR	24917		H7C4M0	H7C4M0	H7C4M0	Filamin A-interacting protein 1-like	FILIP1L	PARIPKPKSTGITKISTKAPTVPMDKPIYQN	PKSTGIT(0.025)KIS(0.992)T(0.982)K	131	131	FILIP1L_(131)	2046300	2214300	0.92413	UID139	2	131	10	S	2	XXXXXXPPPPPPPPPPPPXXXXXXXXXXXXX	22-Prot-0051_RD6_1_7935_-PPAse U	1337	___2	0.992366	0.00207259	90.263	58.122	43.272	-7.3452	8521200	16	19904	20892
	ALS2CR11_(744)	139080	191270	0.72714		444	SSRP1	17882		2107	PRRC2C	102770		Q9Y253	Q9Y253	Q9Y253	DNA polymerase eta	POLH	VSHQGKRNPKSPLACTNKRPRPEGMQTLESF	NPKS(0.003)PLACT(0.997)NK	692	692	POLH_(692)	396800	383130	1.03568	UID113	1	692	9	T	2	XXXXXXXPPPPPPPPPPPXXXXXXXXXXXXX	22-Prot-0051_RD6_1_7935_-PPAse U	4334	___1	0.997021	0.0102217	62.969	25.246	62.969	3.502	779940	112	19381	20339
	LARP1B_(151)	145825	156610	0.931135		2	EIF2S2	40919		173	KLF10	102870		A0A3B3IT29;A0A3B3ISF8;A0A3B3ISF0	A0A3B3IT29	A0A3B3IT29	La-related protein 1B	LARP1B	EKRQPPLLPPKGNPWTKKPPQHLSPDTTGPP	RQPPLLPPKGNPWT(1)K	151;151;151	151	LARP1B_(151)	145825	156610	0.931135	UID81	1	151	14	T	2	XXPPPPPPPPPPPPPPPXXXXXXXXXXXXXX	22-Prot-0051_RD6_1_7935_-PPAse U	441	___1	1	0.00536141	48.785	24.981	41.824	3.6416	448260	80	21373	22422
	CYP7A1_(463)	387490	429505	0.902178		3	CFL2	42379		131	OR2L3	105300		P31150	P31150	P31150	Rab GDP dissociation inhibitor alpha	GDI1	ALYRTDDYLDQPCLETVNRIKLYSESLARYG	TDDYLDQPCLET(1)VNR	205	205	GDI1_(205)	65360	77731.5	0.840843	UID93	1	205	12	T	2	XXXXPPPPPPPPPPPPPPPXXXXXXXXXXXX	22-Prot-0050_RD5_1_7930_+PPAse U	2275	___1	0.999993	0.00295317	58.476	37.115	58.476	1.2441	220820	92	5746;24308	5994;25504
	CYP7A1_(464)	387490	429505	0.902178		2	PA2G4	42918		218;218	ACTB;POTEE;ACTG1	164670		Q53TS8-4	Q53TS8-4	Q53TS8-4	Amyotrophic lateral sclerosis 2 chromosomal region candidate gene 11 protein	ALS2CR11	KQDLNNWLSEKDILNSKTTLSQIIKNIPADS	KQDLNNWLS(0.038)EKDILNS(0.962)K	744	744	ALS2CR11_(744)	139080	191270	0.72714	UID44	1	744	16	S	2	PPPPPPPPPPPPPPPPPXXXXXXXXXXXXXX	22-Prot-0048_RD3_1_7923_+PPAse H	3106	___1	0.961752	0.00947263	51.569	31.679	51.569	-2.3605	330360	43	12795	13356
	POLH_(692)	396800	383130	1.03568		101	TRA2B	43252		153;154	KIF13A;KIF13B	164900		P22680	P22680	P22680	Cholesterol 7-alpha-monooxygenase	CYP7A1	LFAIHEIKQFLILMLSYFELELIEGQAKCPP	QFLILMLS(1)Y(1)FELELIEGQAKCPPLDQSR	463	463	CYP7A1_(463)	387490	429505	0.902178	UID151	2	463	8	S	3	XXXXXXXXPPPPPPPPPPPPPPPPPPPPPPP	22-Prot-0050_RD5_1_7931_+PPAse U	2183	___2	0.999999	0.000273403	73.532	49.656	73.532	8.6288	1246500	28	20132	21128
	RYBP_(72)	1731500	2137050	0.810229		2484	IGF2R	43768		323	SLIT1	176420		P22680	P22680	P22680	Cholesterol 7-alpha-monooxygenase	CYP7A1	FAIHEIKQFLILMLSYFELELIEGQAKCPPL	QFLILMLS(1)Y(1)FELELIEGQAKCPPLDQSR	464	464	CYP7A1_(464)	387490	429505	0.902178	UID240	2	464	9	Y	3	XXXXXXXPPPPPPPPPPPPPPPPPPPPPPPP	22-Prot-0050_RD5_1_7931_+PPAse U	2183	___2	0.999999	0.000273403	73.532	49.656	73.532	8.6288	1246500	117	20132	21128
	RYBP_(70)	1731500	2137050	0.810229		804;804	DDX46	60518		56;60	HOXA10	197530		Q8N488	Q8N488	Q8N488	RING1 and YY1-binding protein	RYBP	INSQLVAQQVAQQYATPPPPKKEKKEKVEKQ	INS(0.001)QLVAQQVAQQY(1)AT(1)PPPPK	72	72	RYBP_(72)	1731500	2137050	0.810229	UID231	2	72	16	T	3	PPPPPPPPPPPPPPPPPPPPPXXXXXXXXXX	22-Prot-0050_RD5_1_7930_+PPAse U	3403	___2	0.999699	0.0063172	50.641	16.169	40.83	-5.3668	6005700	108	11180	11653;11654
	FILIP1L_(131)	2046300	2214300	0.92413		292	ATAT1	66996		5	KLHDC7B	227210		Q8N488	Q8N488	Q8N488	RING1 and YY1-binding protein	RYBP	PRINSQLVAQQVAQQYATPPPPKKEKKEKVE	INS(0.001)QLVAQQVAQQY(1)AT(1)PPPPK	70	70	RYBP_(70)	1731500	2137050	0.810229	UID243	2	70	14	Y	3	XXPPPPPPPPPPPPPPPPPPPPPXXXXXXXX	22-Prot-0050_RD5_1_7931_+PPAse U	3403	___2	0.999773	0.0063172	50.641	16.169	46.768	-5.9197	6005700	120	11180	11653;11654
	FILIP1L_(132)	2046300	2214300	0.92413		830	COPB2	87622		156	IGSF8	239340		H7C4M0	H7C4M0	H7C4M0	Filamin A-interacting protein 1-like	FILIP1L	ARIPKPKSTGITKISTKAPTVPMDKPIYQNG	PKSTGIT(0.02)KIS(0.985)T(0.994)K	132	132	FILIP1L_(132)	2046300	2214300	0.92413	UID212	2	132	11	T	2	XXXXXPPPPPPPPPPPPXXXXXXXXXXXXXX	22-Prot-0050_RD5_1_7931_+PPAse U	1337	___2	0.99434	0.00207259	90.263	58.122	90.263	-7.1015	8521200	89	19904	20892
	IFT27_(154)	2701000	924420	2.92183		30	DAW1	105180		847	ECT2L	262980		F5GZ09;Q9BW83-2;Q9BW83;H0Y6C7	F5GZ09	F5GZ09	Intraflagellar transport protein 27 homolog	IFT27	CSKWLEKARSQAPGISLPGVLVGNKTDLAGR	ARSQAPGIS(1)LPGVLVGNK	154;114;115;90	154	IFT27_(154)	2701000	924420	2.92183	UID10	1	154	9	S	2	XXXXXXXPPPPPPPPPPPPPPPPPPXXXXXX	22-Prot-0048_RD3_1_7923_+PPAse H	1063	___1	0.999973	0.00582744	61.042	21.34	61.042	-0.63599	3996800	9	2376	2496
	FAM214A_(879)	4181200	3099200	1.34912		101;102;104;105	RPLP1;RPLP2	121100		154	PPIC	297250		H0Y3Q9;Q32MH5;Q32MH5-3	H0Y3Q9	H0Y3Q9	Protein FAM214A	FAM214A	PPSGTIQVTLFNPNKTVVKMFVVIYDLRDMP	GY(0.04)RVPPS(0.478)GT(0.478)IQVT(0.003)LFNPNKT(1)VVK	879;967;974	879	FAM214A_(879)	4181200	3099200	1.34912	UID211	2	879	20	T	3	PPPPPPPPPPPPPPPPPPPXXXXXXXXXXXX	22-Prot-0048_RD3_1_7922_+PPAse H	1202	___2	0.999903	0.00112483	71.912	41.885	54.912	-8.8716	7280400	88	9137	9512
						166	TPD52L2	122700		283	BRCA1	326790		O15015-1;O15015	O15015-1	O15015-1	Zinc finger protein 646	ZNF646	LCPKLLPNLLSLKNHSRTHTDPKRHCCSICG	LLPNLLS(0.001)LKNHS(0.999)R	1723;1723	1723	ZNF646_(1723)	124610	NaN		UID18	1	1723	12	S	3	XXXXPPPPPPPPPPPPPXXXXXXXXXXXXXX	22-Prot-0049_RD4_1_7926_-PPAse H	1561	___1	0.999074	0.0183558	50.297	29.146	50.297	9.4937	124610	17	15177	15839
						1723	ZNF646	124610		83	SRCIN1	400350		P35606-2;P35606;H0YAC7	P35606-2	P35606-2	Coatomer subunit beta'	COPB2	PSRSTAQQELDGKPASPTPVIVASHTANKEE	S(0.002)T(0.002)AQQELDGKPAS(0.801)PT(0.17)PVIVAS(0.016)HT(0.009)ANKEEK	830;859;73	830	COPB2_(830)	87622	NaN		UID34	1	830	13	S	4	XXXPPPPPPPPPPPPPPPPPPPPPPPPPPPP	22-Prot-0049_RD4_1_7926_-PPAse H	2323	___1	0.801107	0.00031884	48.801	43.224	41.152	-0.12709	175250	33	23626	24782
						258;278	ODR4	141290		107	PPIA	487940		Q5JSH3-2;Q5JSH3	Q5JSH3-2	Q5JSH3-2	WD repeat-containing protein 44	WDR44	GKVGLSTFKETENTAYKVGNESPVQELKQDV	VGLSTFKETENT(0.003)AY(0.997)K	44;44	44	WDR44_(44)	6449000	NaN		UID120	1	44	14	Y	2	XXPPPPPPPPPPPPPPPXXXXXXXXXXXXXX	22-Prot-0049_RD4_1_7926_-PPAse H	3124	___1	0.996567	0.00625878	48.701	24.012	48.701	-0.84099	6449000	119	27025	28352
						56	VIM	166390		103	ZMYM2	550890		Q49AG3	Q49AG3	Q49AG3	Zinc finger BED domain-containing protein 5	ZBED5	PHAQCVLCKKILSNSSLAPSKLRRHLETKHA	ILS(0.001)NS(0.432)S(0.784)LAPS(0.784)KLRR	143	143	ZBED5_(143)	476220	NaN		UID164	2	143	6	S	2	XXXXXXXXXXPPPPPPPPPPPPPPXXXXXXX	22-Prot-0049_RD4_1_7926_-PPAse H	3087	___2	0.783555	0.00830392	51.531	24.153	51.531	7.9286	476220	41	10933	11381
						12;15	EIF4ENIF1	175184		42	IK	716220		Q49AG3	Q49AG3	Q49AG3	Zinc finger BED domain-containing protein 5	ZBED5	CVLCKKILSNSSLAPSKLRRHLETKHAAYKD	ILS(0.001)NS(0.432)S(0.784)LAPS(0.784)KLRR	147	147	ZBED5_(147)	476220	NaN		UID165	2	147	10	S	2	XXXXXXPPPPPPPPPPPPPPXXXXXXXXXXX	22-Prot-0049_RD4_1_7926_-PPAse H	3087	___2	0.783555	0.00830392	51.531	24.153	51.531	7.9286	476220	42	10933	11381
						8	METTL8	197620		358;367	ESRRG	791920		A0A075B6E9;A0A494C1A4;Q96NW7-2;Q96NW7	A0A075B6E9	A0A075B6E9	Leucine-rich repeat-containing protein 7	LRRC7	LWLSDNQSKALIPLQTEAHPETKQRVLTNYM	ALIPLQT(0.986)EAHPET(0.014)KQRVLT(0.55)NY(0.45)MFPQQPR	416;449;411;411	416	LRRC7_(416)	1699600	NaN		UID196	2	416	7	T	4	XXXXXXXXXPPPPPPPPPPPPPPPPPPPPPP	22-Prot-0049_RD4_1_7926_-PPAse H	10	___2	0.986293	0.00919533	48.201	26.533	48.201	-6.9737	1699600	73	1649	1737
						3	CFL1	334940		367	MCCC2	948510		A0A0C4DG89;Q7L014	A0A0C4DG89;Q7L014	A0A0C4DG89	Probable ATP-dependent RNA helicase DDX46	DDX46	NERKKLQKAALGLQDSDDEDAAVDIDEQIES	AALGLQDS(1)DDEDAAVDIDEQIESMFNSK	804;804	804;804	DDX46_(804;804)	60518	NaN		UID2	1	804	8	S	3	XXXXXXXXPPPPPPPPPPPPPPPPPPPPPPP	22-Prot-0049_RD4_1_7927_-PPAse H	244;3271	___1	1	3.58839e-05	81.031	79.393	81.031	0.79998	121040	1	218	229
						60;68;69	TGIF2	337060		272	LCORL	1398900		P06748;P06748-2;P06748-3	P06748	P06748	Nucleophosmin	NPM1	DELHIVEAEAMNYEGSPIKVTLATLKMSVQP	TVSLGAGAKDELHIVEAEAMNY(0.015)EGS(0.981)PIKVT(0.003)LATLK	70;70;70	70	NPM1_(70)	481845	NaN		UID23	1	70	25	S	4	PPPPPPPPPPPPPPPPPPPPPPPPPPXXXXX	22-Prot-0049_RD4_1_7927_-PPAse H	1946	___1	0.981035	3.73954e-147	208.7	196.01	208.7	2.0806	1453600	22	26169	27450
						143;147	ZBED5	476220		38	MNX1	1761500		P11717	P11717	P11717	Cation-independent mannose-6-phosphate receptor	IGF2R	QKTVSSTKLVSFHDDSDEDLLHI________	LVS(0.002)FHDDS(0.998)DEDLLHI	2484	2484	IGF2R_(2484)	43768	NaN		UID26	1	2484	8	S	3	XXXXXXXXPPPPPPPPPPPPPPPXXXXXXXX	22-Prot-0049_RD4_1_7927_-PPAse H	2042	___1	0.997643	0.0497458	42.941	40.462	42.941	-1.8419	43768	25	16854	17598
						70	NPM1	481845		346;352	CAPN5	1778450		P20042	P20042	P20042	Eukaryotic translation initiation factor 2 subunit 2	EIF2S2	______________MSGDEMIFDPTMSKKKK	S(1)GDEMIFDPTMSK	2	2	EIF2S2_(2)	40919	NaN		UID28	1	2	1	S	2	XXXXXXXXXXXXXXXPPPPPPPPPPPPPXXX	22-Prot-0049_RD4_1_7927_-PPAse H	2147	___1	0.999986	0.00180633	52.201	50.1	52.201	0.62249	40919	27	22047;22048	23124;23127
						252;255	HMCN1	561540		171;181	IRF9	2081300		Q5SQI0-7;Q5SQI0-6;Q5SQI0-5;Q5SQI0-4;Q5SQI0-3;Q5SQI0-2;Q5SQI0	Q5SQI0-7	Q5SQI0-7	Alpha-tubulin N-acetyltransferase 1	ATAT1	PHPTARLLLAADPGGSPAQRRRTR_______	LLLAADPGGS(1)PAQRRR	292;292;315;315;292;303;315	292	ATAT1_(292)	66996	NaN		UID47	1	292	10	S	2	XXXXXXPPPPPPPPPPPPPPPPXXXXXXXXX	22-Prot-0049_RD4_1_7927_-PPAse H	3139	___1	1	0.0157122	43.306	20.408	43.306	9.9273	66996	46	15048	15707
						75	PI3	576860		124	USP54	2815200		A0A0A0MSV2;Q7Z2W7-4;Q7Z2W7	A0A0A0MSV2	A0A0A0MSV2	Transient receptor potential cation channel subfamily M member 8	TRPM8	RNLQIAKNSYNDALLTFVWKLVANFRRGFRK	NLQIAKNS(0.006)Y(0.005)NDALLT(0.99)FVWK	281;210;522	281	TRPM8_(281)	2868550	NaN		UID77	1	281	15	T	3	XPPPPPPPPPPPPPPPPPPPXXXXXXXXXXX	22-Prot-0049_RD4_1_7927_-PPAse H	193	___1	0.98968	0.000847227	54.199	39.791	54.199	9.1252	5737100	76	19187	20137
						63	HSPA14	584080						F8VW64;G8JLA5	F8VW64	F8VW64	RNA-binding protein Nova-1	NOVA1	NVAKTEPVSILQPQTTVNPDRIKQTLPSSPT	MPQNVAKTEPVSILQPQT(0.118)T(0.881)VNPDRIK	19;19	19	NOVA1_(19)	1718900	NaN		UID87	1	19	19	T	4	PPPPPPPPPPPPPPPPPPPPPPPXXXXXXXX	22-Prot-0049_RD4_1_7927_-PPAse H	1116	___1	0.881281	0.0241941	47.491	28.778	47.491	-5.2064	1718900	86	18090	18961
						416	LRRC7	1699600						H9KV90;Q9Y566-2;Q9Y566-3;Q9Y566	H9KV90	H9KV90	SH3 and multiple ankyrin repeat domains protein 1	SHANK1	SPPAARRSLLHRLPPTAPGVGPLLLQLGTEP	LPPT(0.993)APGVGPLLLQLGT(0.004)EPPAPHPGVS(0.002)KPWR	1459;838;1442;1451	1459	SHANK1_(1459)	4257000	NaN		UID91	1	1459	4	T	4	XXXXXXXXXXXXPPPPPPPPPPPPPPPPPPP	22-Prot-0049_RD4_1_7927_-PPAse H	1341	___1	0.993422	0.00982534	44.667	18.377	44.667	7.6097	8514000	90	15716	16403
						19	NOVA1	1718900						Q0VDF9;H7C2A1;B0YIZ1	Q0VDF9	Q0VDF9	Heat shock 70 kDa protein 14	HSPA14	VGLAAKQSRIRNISNTVMKVKQILGRSSSDP	IRNIS(0.034)NT(0.966)VMKVK	63;52;63	63	HSPA14_(63)	584080	NaN		UID101	1	63	7	T	2	XXXXXXXXXPPPPPPPPPPPPXXXXXXXXXX	22-Prot-0049_RD4_1_7927_-PPAse H	2807	___1	0.965846	0.045935	47.561	15.013	40.386	8.0831	1168200	100	11439	11923
						281	TRPM8	2868550						C9J3F1;C9J6U8;C9JE69;B5ME25;E7ETE0;B3KW44;Q9H825	C9J3F1	C9J3F1	Methyltransferase-like protein 8	METTL8	________MNMIWRNSISCLRLGKVPHRYQS	NMIWRNS(0.995)IS(0.005)CLR	8;8;8;8;8;8;8	8	METTL8_(8)	197620	NaN		UID5	1	8	7	S	2	XXXXXXXXXPPPPPPPPPPPPXXXXXXXXXX	22-Prot-0051_RD6_1_7934_-PPAse U	596	___1	0.995368	0.0347098	47.361	9.2614	47.361	1.2843	197620	4	19291	20245
						1459	SHANK1	4257000						F8WCV0	F8WCV0	F8WCV0	Dynein assembly factor with WDR repeat domains 1	DAW1	FGEPNHMQVSKILLNSRNYVGI_________	ILLNS(0.968)RNY(0.032)VGI	30	30	DAW1_(30)	105180	NaN		UID11	1	30	5	S	2	XXXXXXXXXXXPPPPPPPPPPPXXXXXXXXX	22-Prot-0051_RD6_1_7934_-PPAse U	1145	___1	0.967858	0.0479418	62.969	37.715	62.969	0.83538	105180	10	10847	11292
						44	WDR44	6449000						O43399;O43399-5;O43399-7;O43399-2;O43399-4;O43399-3;A0A087WZ51;O43399-6	O43399	O43399	Tumor protein D54	TPD52L2	ISRKLGDMRNSATFKSFEDRVGTIKSKVVGD	NSAT(0.001)FKS(0.987)FEDRVGT(0.012)IK	166;180;189;146;160;169;112;123	166	TPD52L2_(166)	122700	NaN		UID19	1	166	7	S	3	XXXXXXXXXPPPPPPPPPPPPPPPPXXXXXX	22-Prot-0051_RD6_1_7934_-PPAse U	1621	___1	0.9871	0.0383584	78.925	70.513	78.925	0.49188	122700	18	19488	20453
														P08670;B0YJC4;A0A1B0GTT5;A0A1B0GVG8	P08670	P08670	Vimentin	VIM	GSALRPSTSRSLYASSPGGVYATRSSAVRLR	SLYAS(0.083)S(0.917)PGGVYATR	56;56;56;56	56	VIM_(56)	166390	NaN		UID25	1	56	6	S	2	XXXXXXXXXXPPPPPPPPPPPPPPXXXXXXX	22-Prot-0051_RD6_1_7934_-PPAse U	1983	___1	0.916833	0.00452265	112.68	94.152	112.68	-2.8347	166390	24	22967	24090
														Q08945	Q08945	Q08945	FACT complex subunit SSRP1	SSRP1	GLKEGMNPSYDEYADSDEDQHDAYLERMKEE	GLKEGMNPSY(0.001)DEY(0.013)ADS(0.94)DEDQHDAY(0.047)LER	444	444	SSRP1_(444)	17882	NaN		UID36	1	444	16	S	4	PPPPPPPPPPPPPPPPPPPPPPPPPPPXXXX	22-Prot-0051_RD6_1_7934_-PPAse U	2800	___1	0.939655	0.000772927	54.143	51.514	42.043	0.081505	54255	35	8155	8495
														Q9Y281;F8WDN3;G3V2U0	Q9Y281	Q9Y281	Cofilin-2	CFL2	_____________MASGVTVNDEVIKVFNDM	AS(0.942)GVT(0.058)VNDEVIKVFNDMK	3;3;3	3	CFL2_(3)	42379	NaN		UID68	1	3	2	S	2	XXXXXXXXXXXXXXPPPPPPPPPPPPPPPPP	22-Prot-0051_RD6_1_7934_-PPAse U	4339	___1	0.941678	0.0114484	49.967	43.713	49.967	2.1187	42379	67	2459	2587
														B0QYZ7;B1AKL4;Q9NRA8-2;Q9NRA8;Q9NRA8-3	B0QYZ7	B0QYZ7	Eukaryotic translation initiation factor 4E transporter	EIF4ENIF1	____QKAKVDLKPLLSSLSANKEKLKESSHS	VDLKPLLS(1)SLS(1)ANK	12;414;251;414;414	12	EIF4ENIF1_(12)	175184	NaN		UID125	2	12	8	S	2	XXXXXXXXPPPPPPPPPPPPPPXXXXXXXXX	22-Prot-0051_RD6_1_7934_-PPAse U	566	___2	0.999683	0.000785724	57.888	17.355	57.888	9.9838	350370	2	26605	27906;27907
														B0QYZ7;B1AKL4;Q9NRA8-2;Q9NRA8;Q9NRA8-3	B0QYZ7	B0QYZ7	Eukaryotic translation initiation factor 4E transporter	EIF4ENIF1	_QKAKVDLKPLLSSLSANKEKLKESSHSGVV	VDLKPLLS(1)SLS(1)ANK	15;417;254;417;417	15	EIF4ENIF1_(15)	175184	NaN		UID126	2	15	11	S	2	XXXXXPPPPPPPPPPPPPPXXXXXXXXXXXX	22-Prot-0051_RD6_1_7934_-PPAse U	566	___2	0.999978	0.000785724	57.888	17.355	57.888	9.9838	350370	3	26605	27906;27907
														Q5SWX8-3;Q5SWX8-4;Q5SWX8	Q5SWX8-3	Q5SWX8-3	Protein odr-4 homolog	ODR4	NSDHRSTATVQICSGSVNLKGAVKCRAYIHS	VLT(0.987)QLLLNS(0.467)DHRS(0.219)T(0.219)AT(0.104)VQICS(0.006)GS(0.998)VNLKGAVK	278;246;278	278	ODR4_(278)	141290	NaN		UID293	3	278	23	S	4	PPPPPPPPPPPPPPPPPPPPPPPPXXXXXXX	22-Prot-0051_RD6_1_7934_-PPAse U	3143	___3	0.998394	0.024849	43.727	26.212	43.727	6.9938	141290	48	27881	29249
														U3KQB5	U3KQB5	U3KQB5	Homeobox protein TGIF2	TGIF2	SGQTNLSVLQRVFYGSLPNIGIISSVQRSST	VFY(0.021)GS(0.989)LPNIGIIS(0.995)S(0.995)VQR	60	60	TGIF2_(60)	337060	NaN		UID315	3	60	5	S	2	XXXXXXXXXXXPPPPPPPPPPPPPPPPPXXX	22-Prot-0051_RD6_1_7934_-PPAse U	4515	___3	0.989017	0.00634998	40.861	15.273	40.861	9.3157	337060	70	26919	28239
														U3KQB5	U3KQB5	U3KQB5	Homeobox protein TGIF2	TGIF2	LQRVFYGSLPNIGIISSVQRSSTGRCQLAPL	VFY(0.021)GS(0.989)LPNIGIIS(0.995)S(0.995)VQR	68	68	TGIF2_(68)	337060	NaN		UID316	3	68	13	S	2	XXXPPPPPPPPPPPPPPPPPXXXXXXXXXXX	22-Prot-0051_RD6_1_7934_-PPAse U	4515	___3	0.994819	0.00634998	40.861	15.273	40.861	9.3157	337060	71	26919	28239
														U3KQB5	U3KQB5	U3KQB5	Homeobox protein TGIF2	TGIF2	QRVFYGSLPNIGIISSVQRSSTGRCQLAPLH	VFY(0.021)GS(0.989)LPNIGIIS(0.995)S(0.995)VQR	69	69	TGIF2_(69)	337060	NaN		UID317	3	69	14	S	2	XXPPPPPPPPPPPPPPPPPXXXXXXXXXXXX	22-Prot-0051_RD6_1_7934_-PPAse U	4515	___3	0.994819	0.00634998	40.861	15.273	40.861	9.3157	337060	72	26919	28239
														Q5SWX8-3;Q5SWX8-4;Q5SWX8	Q5SWX8-3	Q5SWX8-3	Protein odr-4 homolog	ODR4	GNTQATSHSFDVRVLTQLLLNSDHRSTATVQ	VLT(0.987)QLLLNS(0.467)DHRS(0.219)T(0.219)AT(0.104)VQICS(0.006)GS(0.998)VNLKGAVK	258;226;258	258	ODR4_(258)	141290	NaN		UID349	3	258	3	T	4	XXXXXXXXXXXXXPPPPPPPPPPPPPPPPPP	22-Prot-0051_RD6_1_7934_-PPAse U	3143	___3	0.986801	0.024849	43.727	26.212	43.727	6.9938	141290	104	27881	29249
														P19957	P19957	P19957	Elafin	PI3	KAQEPVKGPVSTKPGSCPIILIRCAMLNPPN	PGS(1)CPIILIRCAMLNPPNRCLK	75	75	PI3_(75)	576860	NaN		UID27	1	75	3	S	3	XXXXXXXXXXXXXPPPPPPPPPPPPPPPPPP	22-Prot-0051_RD6_1_7935_-PPAse U	2145	___1	1	0.0438335	46.768	34.111	46.768	-2.3864	576860	26	19897	20885
														P23528;E9PP50;E9PK25;E9PS23	P23528	P23528	Cofilin-1	CFL1	_____________MASGVAVSDGVIKVFNDM	AS(1)GVAVSDGVIKVFNDMK	3;3;41;3	3	CFL1_(3)	334940	NaN		UID30	1	3	2	S	2	XXXXXXXXXXXXXXPPPPPPPPPPPPPPPPP	22-Prot-0051_RD6_1_7935_-PPAse U	2193	___1	0.999999	2.83999e-57	166.29	122.52	158.27	2.775	1836000	29	2454;2455;2456	2577;2580;2582
														Q09666	Q09666	Q09666	Neuroblast differentiation-associated protein AHNAK	AHNAK	SGSKGDLKSSKASLGSLEGEAEAEASSPKGK	AS(0.029)LGS(0.971)LEGEAEAEASSPK	5752	5752	AHNAK_(5752)	17386	NaN		UID37	1	5752	5	S	2	XXXXXXXXXXXPPPPPPPPPPPPPPPPPPXX	22-Prot-0051_RD6_1_7935_-PPAse U	2805	___1	0.971225	0.0121221	76.494	48.231	76.494	-0.057579	17386	36	2484	2615
														Q9UQ80;F8VR77	Q9UQ80	Q9UQ80	Proliferation-associated protein 2G4	PA2G4	______________MSGEDEQQEQTIAEDLV	S(1)GEDEQQEQTIAEDLVVTK	2;2	2	PA2G4_(2)	42918	NaN		UID66	1	2	1	S	2	XXXXXXXXXXXXXXXPPPPPPPPPPPPPPPP	22-Prot-0051_RD6_1_7935_-PPAse U	4325	___1	0.999757	4.61282e-05	51.333	43.685	51.333	-1.945	42918	65	22060;22061	23140;23142
														P62995-3;P62995;H7BXF3;H7C2L4	P62995-3	P62995-3	Transformer-2 protein homolog beta	TRA2B	GRRIRVDFSITKRPHTPTPGIYMGRPTYGSS	RPHT(0.977)PT(0.023)PGIYMGRPTYGSSR	101;201;60;21	101	TRA2B_(101)	43252	NaN		UID100	1	101	4	T	4	XXXXXXXXXXXXPPPPPPPPPPPPPPPPPPP	22-Prot-0051_RD6_1_7935_-PPAse U	2671	___1	0.977221	0.00594573	49.718	44.902	49.718	1.6643	43252	99	21332	22377
														P05386;P05387;H0YDD8;P05386-2	P05386;P05387	P05387	60S acidic ribosomal protein P1;60S acidic ribosomal protein P2	RPLP1;RPLP2	AAPAEEKKVEAKKEESEESDDDMGFGLFD__;APAAAEEKKDEKKEESEESDDDMGFGLFD__	KEES(1)EES(1)DDDMGFGLFD	101;102;79;76	101;102	RPLP1;RPLP2_(101;102)	121100	NaN		UID143	2	102	4	S	2	XXXXXXXXXXXXPPPPPPPPPPPPPPPPPXX	22-Prot-0051_RD6_1_7935_-PPAse U	1927;1928	___2	1	0.00010535	81.867	70.895	48.201	-0.35998	368650	20	12259	12788
														P05386;P05387;H0YDD8;P05386-2	P05386;P05387	P05387	60S acidic ribosomal protein P1;60S acidic ribosomal protein P2	RPLP1;RPLP2	AAEEKKDEKKEESEESDDDMGFGLFD_____;AEEKKVEAKKEESEESDDDMGFGLFD_____	KEES(1)EES(1)DDDMGFGLFD	104;105;82;79	104;105	RPLP1;RPLP2_(104;105)	121100	NaN		UID144	2	105	7	S	2	XXXXXXXXXPPPPPPPPPPPPPPPPPXXXXX	22-Prot-0051_RD6_1_7935_-PPAse U	1927;1928	___2	1	0.00010535	81.867	70.895	48.201	-0.35998	368650	21	12259	12788
														Q96RW7-2;Q96RW7	Q96RW7-2	Q96RW7-2	Hemicentin-1	HMCN1	RIPFDPSLKEVTVSLSGPSPMIEIRNPLGKL	EVT(0.042)VS(0.174)LS(0.814)GPS(0.97)PMIEIR	252;252	252	HMCN1_(252)	561540	NaN		UID179	2	252	7	S	2	XXXXXXXXXPPPPPPPPPPPPPPPPXXXXXX	22-Prot-0051_RD6_1_7935_-PPAse U	3722	___2	0.813965	0.0442407	52.662	13.369	52.662	-0.87244	561540	56	5515	5753
														Q96RW7-2;Q96RW7	Q96RW7-2	Q96RW7-2	Hemicentin-1	HMCN1	FDPSLKEVTVSLSGPSPMIEIRNPLGKLIKK	EVT(0.042)VS(0.174)LS(0.814)GPS(0.97)PMIEIR	255;255	255	HMCN1_(255)	561540	NaN		UID180	2	255	10	S	2	XXXXXXPPPPPPPPPPPPPPPPXXXXXXXXX	22-Prot-0051_RD6_1_7935_-PPAse U	3722	___2	0.97042	0.0442407	52.662	13.369	52.662	-0.87244	561540	57	5515	5753
														Q5T0V2;Q5T0V4;Q5T0V0;O75093-2;O75093	Q5T0V2	Q5T0V2	Slit homolog 1 protein	SLIT1	PETMTEIRLELNGIKSIPPGAFSPYRKLRRI	LELNGIKS(0.959)IPPGAFS(0.023)PY(0.019)R	323;306;323;323;323	323	SLIT1_(323)	NaN	176420		UID20	1	323	8	S	3	XXXXXXXXPPPPPPPPPPPPPPPPPPXXXXX	22-Prot-0048_RD3_1_7922_+PPAse H	1697	___1	0.958717	0.00887944	47.57	29.472	47.57	3.2418	176420	19	13615	14224
														Q13118-2;Q13118	Q13118-2	Q13118-2	Krueppel-like factor 10	KLF10	TCPMKAASILNYQNNSFRRRTHLNVEAARKN	AASILNY(0.005)QNNS(0.995)FRR	173;184	173	KLF10_(173)	NaN	102870		UID38	1	173	11	S	2	XXXXXPPPPPPPPPPPPPPXXXXXXXXXXXX	22-Prot-0048_RD3_1_7922_+PPAse H	2839	___1	0.994603	0.0503607	50.297	44.462	50.297	9.4856	102870	37	311	327
														Q969P0-3;Q969P0;C9J8Z4	Q969P0-3	Q969P0-3	Immunoglobulin superfamily member 8	IGSF8	SGKVELRVLPDVLQVSAAPPGPRGRQAPTSP	VLPDVLQVS(0.996)AAPPGPRGRQAPT(0.002)S(0.002)PPR	156;156;156	156	IGSF8_(156)	NaN	239340		UID55	1	156	9	S	4	XXXXXXXPPPPPPPPPPPPPPPPPPPPPPPP	22-Prot-0048_RD3_1_7922_+PPAse H	3586	___1	0.996092	0.0474578	43.904	14.949	43.904	1.8908	239340	54	27749	29114
														Q8NG85	Q8NG85	Q8NG85	Olfactory receptor 2L3	OR2L3	SMAYDRYIAICFPLHYPIRMSKRMCVLMITG	YIAICFPLHY(1)PIR	131	131	OR2L3_(131)	NaN	105300		UID122	1	131	10	Y	3	XXXXXXPPPPPPPPPPPPPXXXXXXXXXXXX	22-Prot-0048_RD3_1_7922_+PPAse H	3457	___1	0.999984	0.00888652	48.157	19.83	48.157	-5.5653	208780	121	29768	31207;31208
														Q9UBW7;A0A087X151;Q9UBW7-2	Q9UBW7	Q9UBW7	Zinc finger MYM-type protein 2	ZMYM2	KNEELQGNDSKITPSSKELASQKGSVSETIV	ITPS(0.012)S(0.969)KELAS(0.018)QK	103;103;103	103	ZMYM2_(103)	NaN	550890		UID65	1	103	5	S	2	XXXXXXXXXXXPPPPPPPPPPPPXXXXXXXX	22-Prot-0048_RD3_1_7923_+PPAse H	4210	___1	0.969395	0.0113312	65.404	18.055	65.404	2.0507	550890	64	11803	12312
														P45877	P45877	P45877	Peptidyl-prolyl cis-trans isomerase C	PPIC	PDTNGSQFFITLTKPTWLDGKHVVFGKVIDG	PT(1)WLDGKHVVFGK	154	154	PPIC_(154)	NaN	297250		UID96	1	154	2	T	3	XXXXXXXXXXXXXXPPPPPPPPPPPPPXXXX	22-Prot-0048_RD3_1_7923_+PPAse H	2403	___1	1	0.015935	50.314	22.725	50.314	4.7046	297250	95	19950	20940;20941
														P62508-4;P62508-2;P62508-3;P62508;P62508-5	P62508-4	P62508-4	Estrogen-related receptor gamma	ESRRG	GQHMEDPRRAGKMLMTLPLLRQTSTKAVQHF	AGKMLMT(0.931)LPLLRQT(0.111)S(0.111)T(0.846)K	358;397;404;420;432	358	ESRRG_(358)	NaN	791920		UID219	2	358	7	T	2	XXXXXXXXXPPPPPPPPPPPPPPPPPXXXXX	22-Prot-0048_RD3_1_7923_+PPAse H	2651	___2	0.931339	0.0175164	46.068	23.112	46.068	-0.034155	791920	96	945	998
														P62508-4;P62508-2;P62508-3;P62508;P62508-5	P62508-4	P62508-4	Estrogen-related receptor gamma	ESRRG	AGKMLMTLPLLRQTSTKAVQHFYNIKLEGKV	AGKMLMT(0.931)LPLLRQT(0.111)S(0.111)T(0.846)K	367;406;413;429;441	367	ESRRG_(367)	NaN	791920		UID220	2	367	16	T	2	PPPPPPPPPPPPPPPPPXXXXXXXXXXXXXX	22-Prot-0048_RD3_1_7923_+PPAse H	2651	___2	0.845872	0.0175164	46.068	23.112	46.068	-0.034155	791920	97	945	998
														E7EPN9;Q9Y520-3;Q9Y520-6;Q9Y520-4;Q9Y520-5;Q9Y520;Q9Y520-7;A0A2R8Y7F4;A0A2R8YET2;H7C5N8;Q9Y520-2	E7EPN9	E7EPN9	Protein PRRC2C	PRRC2C	QPRAGPIKAQKLPDLSPVENKEHKPGPIGKE	AQKLPDLS(1)PVENKEHK	2107;2105;2105;2105;2058;2105;2107;159;299;653;1862	2107	PRRC2C_(2107)	NaN	102770		UID8	1	2107	8	S	2	XXXXXXXXPPPPPPPPPPPPPPPPXXXXXXX	22-Prot-0050_RD5_1_7930_+PPAse U	917	___1	1	0.0433388	43.306	11.255	43.306	6.4413	102770	7	2285	2404
														Q008S8	Q008S8	Q008S8	Epithelial cell-transforming sequence 2 oncogene-like	ECT2L	TPFERTSKTTYQFIASVALHRLLIENIPDSK	T(0.05)T(0.05)Y(0.041)QFIAS(0.86)VALHRLLIENIPDSK	847	847	ECT2L_(847)	NaN	262980		UID35	1	847	8	S	3	XXXXXXXXPPPPPPPPPPPPPPPPPPPPPPP	22-Prot-0050_RD5_1_7930_+PPAse U	2742	___1	0.859721	0.0335574	44.16	22.785	44.16	-5.0579	262980	34	25996	27270
														Q8N3X6-3	Q8N3X6-3	Q8N3X6-3	Ligand-dependent nuclear receptor corepressor-like protein	LCORL	VAGMLQVKTDEKLNVSDENTASCPLSPIKMC	LNVS(0.999)DENTASCPLSPIK	272	272	LCORL_(272)	NaN	1398900		UID54	1	272	4	S	2	XXXXXXXXXXXXPPPPPPPPPPPPPPPPPXX	22-Prot-0050_RD5_1_7930_+PPAse U	3400	___1	0.999462	0.0468761	42.061	13.733	42.061	7.4304	1398900	53	15652	16337
														Q96G42	Q96G42	Q96G42	Kelch domain-containing protein 7B	KLHDC7B	___________MVLRSHPFPRQDRPQGSVPR	VLRS(1)HPFPRQDR	5	5	KLHDC7B_(5)	NaN	227210		UID56	1	5	4	S	2	XXXXXXXXXXXXPPPPPPPPPPPPXXXXXXX	22-Prot-0050_RD5_1_7930_+PPAse U	3649	___1	1	0.0151836	53.517	24.2	53.517	4.361	227210	55	27807	29173
														P62937;P62937-2	P62937	P62937	Peptidyl-prolyl cis-trans isomerase A;Peptidyl-prolyl cis-trans isomerase A, N-terminally processed	PPIA	HTGPGILSMANAGPNTNGSQFFICTAKTEWL	HT(0.005)GPGILS(0.048)MANAGPNT(0.899)NGS(0.021)QFFICT(0.016)AKT(0.011)EWLDGK	107;47	107	PPIA_(107)	NaN	487940		UID99	1	107	16	T	4	PPPPPPPPPPPPPPPPPPPPPPPPPPPPPPP	22-Prot-0050_RD5_1_7930_+PPAse U	2668	___1	0.899395	0.00148311	52.794	40.137	52.794	-6.7154	487940	98	9558	9956
														Q13123;E7EQZ7;D6REL4;D6RAY9;D6RCQ4	Q13123	Q13123	Protein Red	IK	HQSKLTNEDFRKLLMTPRAAPTSAPPSKSRH	LLMT(0.758)PRAAPT(0.239)S(0.003)APPSK	42;42;42;42;38	42	IK_(42)	NaN	716220		UID102	1	42	4	T	2	XXXXXXXXXXXXPPPPPPPPPPPPPPPPXXX	22-Prot-0050_RD5_1_7930_+PPAse U	2840	___1	0.758142	0.00139592	119.94	55.67	57.003	-6.7955	2624400	101	15140	15800;15801;15802
														Q9HCC0-2;Q9HCC0;D6RD67	Q9HCC0-2	Q9HCC0-2	Methylcrotonoyl-CoA carboxylase beta chain, mitochondrial	MCCC2	LCCQRNIPLLFLQNITGFMVGREYEAEGIAK	NIPLLFLQNIT(1)GFMVGREYEAEGIAK	367;405;177	367	MCCC2_(367)	NaN	948510		UID112	1	367	11	T	3	XXXXXPPPPPPPPPPPPPPPPPPPPPPPPPP	22-Prot-0050_RD5_1_7930_+PPAse U	4017	___1	0.999696	0.01535	44.667	25.091	44.667	8.5695	948510	111	18894	19836
														A0A1B0GUA8;Q9H1H9-3;Q9H1H9-4;Q9H1H9-2;Q9H1H9;E7ERX9;Q9NQT8	A0A1B0GUA8;E7ERX9	E7ERX9	Kinesin-like protein KIF13A;Kinesin-like protein;Kinesin-like protein KIF13B	KIF13A;KIF13B	NEEQSFKVEVSYMEIYNEKVRDLLDPKGSRQ;NESQTFKVEVSYMEIYNEKVRDLLDPKGSRQ	VEVSYMEIY(1)NEKVR	153;153;153;153;153;154;154	153;154	KIF13A;KIF13B_(153;154)	NaN	164900		UID115	1	154	9	Y	3	XXXXXXXPPPPPPPPPPPPPPXXXXXXXXXX	22-Prot-0050_RD5_1_7930_+PPAse U	338;927	___1	0.999882	0.00541924	44.57	9.2404	44.57	-8.4555	164900	114	26740	28051
														H0YMB0;Q00978	H0YMB0	H0YMB0	Interferon regulatory factor 9	IRF9	LFPKPGPLEPTQRLLSQLERGILVASNPRGL	LLS(1)QLERGILVAS(1)NPR	171;273	171	IRF9_(171)	NaN	2081300		UID137	2	171	3	S	3	XXXXXXXXXXXXXPPPPPPPPPPPPPPPPXX	22-Prot-0050_RD5_1_7930_+PPAse U	1262	___2	1	0.00997495	55.754	6.6576	55.754	-6.5313	2081300	14	15294	15964
														H0YMB0;Q00978	H0YMB0	H0YMB0	Interferon regulatory factor 9	IRF9	TQRLLSQLERGILVASNPRGLFVQRLCPIPI	LLS(1)QLERGILVAS(1)NPR	181;283	181	IRF9_(181)	NaN	2081300		UID138	2	181	13	S	3	XXXPPPPPPPPPPPPPPPPXXXXXXXXXXXX	22-Prot-0050_RD5_1_7930_+PPAse U	1262	___2	1	0.00997495	55.754	6.6576	55.754	-6.5313	2081300	15	15294	15964
														P31260-2;P31260	P31260-2	P31260-2	Homeobox protein Hox-A10	HOXA10	FNMYLTRERRLEISRSVHLTDRQVKIWFQNR	LEIS(0.007)RS(0.995)VHLT(0.998)DRQVK	56;372	56	HOXA10_(56)	NaN	197530		UID155	2	56	6	S	2	XXXXXXXXXXPPPPPPPPPPPPPPPXXXXXX	22-Prot-0050_RD5_1_7930_+PPAse U	2278	___2	0.995006	0.0141846	45.939	12.839	45.939	-7.9982	197530	32	13603	14212
														A0A3B3IRX8;E7EV01;O15484	A0A3B3IRX8	A0A3B3IRX8	Calpain-5	CAPN5	LRTDQPEGRYVIIPTTFEPGHTGEFLLRVFT	YVIIPT(0.367)T(0.817)FEPGHT(0.817)GEFLLRVFTDVPSNCR	346;514;474	346	CAPN5_(346)	NaN	1778450		UID201	2	346	7	T	4	XXXXXXXXXPPPPPPPPPPPPPPPPPPPPPP	22-Prot-0050_RD5_1_7930_+PPAse U	439	___2	0.816643	1.41759e-05	80.026	62.511	80.026	1.4261	3556900	78	30339	31797
														M0QX27;M0R2E9;M0R0H5;M0QYR6;M0R1I2;Q03405-2;Q03405-3;Q03405	M0QX27	M0QX27	Urokinase plasminogen activator surface receptor	PLAUR	SCTHSEKTNRTLSYRTGLKITSLT_______	TNRT(0.002)LS(0.476)Y(0.723)RT(0.799)GLK	70;76;56;56;81;81;81;81	70	PLAUR_(70)	NaN	24917		UID214	2	70	9	T	2	XXXXXXXPPPPPPPPPPPPXXXXXXXXXXXX	22-Prot-0050_RD5_1_7930_+PPAse U	1449	___2	0.799198	0.020822	44.57	34.32	44.57	-6.8953	24917	91	25515	26776
														P31260-2;P31260	P31260-2	P31260-2	Homeobox protein Hox-A10	HOXA10	LTRERRLEISRSVHLTDRQVKIWFQNRRMKL	LEIS(0.007)RS(0.995)VHLT(0.998)DRQVK	60;376	60	HOXA10_(60)	NaN	197530		UID216	2	60	10	T	2	XXXXXXPPPPPPPPPPPPPPPXXXXXXXXXX	22-Prot-0050_RD5_1_7930_+PPAse U	2278	___2	0.997717	0.0141846	45.939	12.839	45.939	-7.9982	197530	93	13603	14212
														A0A087WTE6	A0A087WTE6	A0A087WTE6	SRC kinase-signaling inhibitor 1	SRCIN1	IPTLLSPQDLGPPGGSAPGPTRKAAPGPRAF	QLIPT(0.053)LLS(0.155)PQDLGPPGGS(0.777)APGPT(0.015)RKAAPGPR	83	83	SRCIN1_(83)	NaN	400350		UID1	1	83	18	S	3	PPPPPPPPPPPPPPPPPPPPPPPPPPPPPXX	22-Prot-0050_RD5_1_7931_+PPAse U	29	___1	0.777316	0.0101066	54.418	29.185	54.418	-4.2319	400350	0	20456	21470
														S4R364	S4R364	S4R364	Motor neuron and pancreas homeobox protein 1	MNX1	PSKVGPREPLFSPPQSRWASGSFLSIRAGHL	VGPREPLFS(0.001)PPQS(0.999)R	38	38	MNX1_(38)	NaN	1761500		UID70	1	38	13	S	2	XXXPPPPPPPPPPPPPPXXXXXXXXXXXXXX	22-Prot-0050_RD5_1_7931_+PPAse U	4512	___1	0.998757	0.00876935	44.598	14.249	44.598	0.56203	1761500	69	27054	28382
														A0A0A0MSN1;A0A494C182;E9PH68;E7EWN5;A0A0U1RRA9;Q5YLB2;P38398-8;P38398-4;P38398;P38398-7	A0A0A0MSN1	A0A0A0MSN1	Breast cancer type 1 susceptibility protein	BRCA1	GAFVTEPQIIQERPLTNKLKRKRRPTSGLHP	ASLPNLSHVTENLIIGAFVT(0.007)EPQIIQERPLT(0.993)NK	283;452;473;499;458;499;452;482;499;499	283	BRCA1_(283)	NaN	326790		UID76	1	283	31	T	4	PPPPPPPPPPPPPPPPPPXXXXXXXXXXXXX	22-Prot-0050_RD5_1_7931_+PPAse U	190	___1	0.992914	0.0176849	58.402	27.057	58.402	-1.2037	326790	75	2499	2630
														P60709;A0A2R8Y793;A0A2R8YEA7;Q6S8J3;P63261;I3L4N8	P60709;P63261	P63261	Actin, cytoplasmic 1;Actin, cytoplasmic 1, N-terminally processed;POTE ankyrin domain family member E;Actin, cytoplasmic 2;Actin, cytoplasmic 2, N-terminally processed	ACTB;POTEE;ACTG1	TAEREIVRDIKEKLCYVALDFEQEMATAASS	LCY(1)VALDFEQEMATAASSSSLEK	218;202;96;918;218;209	218;218	ACTB;POTEE;ACTG1_(218;218)	NaN	164670		UID119	1	218	3	Y	3	XXXXXXXXXXXXXPPPPPPPPPPPPPPPPPP	22-Prot-0050_RD5_1_7931_+PPAse U	2588;2682	___1	0.999999	0.000999758	85.513	76.358	85.513	0.62287	164670	118	13434	14036
														Q70EL1-9;Q70EL1-10;Q70EL1-8;Q70EL1-7;Q70EL1	Q70EL1-9	Q70EL1-9	Inactive ubiquitin carboxyl-terminal hydrolase 54	USP54	AQEQLFQEKKDPANPSPVMPGIATSERGDEH	DPANPS(1)PVMPGIAT(0.5)S(0.5)ER	124;124;124;886;1036	124	USP54_(124)	NaN	2815200		UID173	2	124	6	S	2	XXXXXXXXXXPPPPPPPPPPPPPPPPPXXXX	22-Prot-0050_RD5_1_7931_+PPAse U	3261	___2	0.999963	0.00138668	42.061	25.069	42.061	-3.7663	2815200	50	3951	4135;4136
														A0A3B3IRX8;E7EV01;O15484	A0A3B3IRX8	A0A3B3IRX8	Calpain-5	CAPN5	EGRYVIIPTTFEPGHTGEFLLRVFTDVPSNC	Y(0.001)VIIPT(0.323)T(0.739)FEPGHT(0.917)GEFLLRVFT(0.012)DVPS(0.007)NCR	352;520;480	352	CAPN5_(352)	NaN	1778450		UID202	2	352	13	T	4	XXXPPPPPPPPPPPPPPPPPPPPPPPPPPPP	22-Prot-0050_RD5_1_7931_+PPAse U	439	___2	0.917139	1.41759e-05	80.026	62.511	42.888	0.27565	3556900	79	30339	31797

## Sheet: 04-MQ proteingrps-Psty
		Source Data for graphs supplementary figure "Phosphatase"						Source Data for graphs supplementary figure "Phosphatase"							Phosphopeptids with no LFQ but iBAQ						ProteinGroups results for proteins with identified and localised phosphosites
Graphs Supplementary figures y, AB "Phosphatase"		Gene names/loclalized P-position	ratio LFQ/Ppep Int without PPase	ratio LFQ/Ppep Int with PPase	ratio iBAQ/Ppep Int without PPase	ratio iBAQ/Ppep Int with PPase			Gene names/loclalized P-position	ratio LFQ/Ppep Int without PPase	ratio LFQ/Ppep Int with PPase	ratio iBAQ/Ppep Int without PPase	ratio iBAQ/Ppep Int with PPase		Gene names/loclalized P-position	ratio LFQ/Ppep Int without PPase	ratio LFQ/Ppep Int with PPase	ratio iBAQ/Ppep Int without PPase	ratio iBAQ/Ppep Int with PPase		Protein IDs	Majority protein IDs	Protein names	Gene names	Phospho (STY) site IDs	Phospho (STY) site positions	mean LFQ intensity without PPase	mean LFQ intensity with PPase	mean iBAQ without PPase	mean iBAQ with PPase	sum of peptides without phosphatase	sum of peptides with phosphatase	detected in exp woPPase	detected in exp w Ppase	sum of unique peptides without phosphatase	sum of unique peptides with phosphatase	detected in exp woPPase	detected in exp w Ppase	Seq cov detected in exp woPPase	Seq Cov detected in exp w Ppase	sum of MS/MS count without phosphatase	sum of MS/MS count with phosphatase	MS/MS detected in exp woPPase	MS/MS detected in exp w PPase	Intensity	iBAQ	iBAQ peptides	total MS/MS count	Mol. weight [kDa]
	phosphopeptides on proteins only present without phosphatase	LRRC7/416	0.238898	#DIV/0!	0.000127465	#DIV/0!		phosphopepeptides on proteins only present with phosphatase	CAPN5/346	#DIV/0!	0.146483	#DIV/0!	0.000373417		ESRRG/358	#DIV/0!	#DIV/0!	#DIV/0!	0.0588241		F5GZ09;Q9BW83-2;Q9BW83;B1AH58;H0Y6C7	F5GZ09;Q9BW83-2;Q9BW83;B1AH58;H0Y6C7	Intraflagellar transport protein 27 homolog	IFT27	9	154	671705	394195	119602	69695.9	7	7	4	4	7	7	4	4	4	4	8	4	4	3	9625200	757200	12	12	19.668
		HSPA14/63	0.325726	#DIV/0!	0.0223469	#DIV/0!			CAPN5/352	#DIV/0!	0.146483	#DIV/0!	0.000373417		ESRRG/367	#DIV/0!	#DIV/0!	#DIV/0!	0.0588241		H0Y3Q9;Q32MH5;Q32MH5-3;Q32MH5-2	H0Y3Q9;Q32MH5;Q32MH5-3;Q32MH5-2	Protein FAM214A	FAM214A	11;87;88	866;868;879	953772	1587680	1402.85	4101.68	25	25	4	4	25	25	4	4	4	4	1	3	1	2	11937000	9881.2	46	4	105.8
		NOVA1/19	0.36949	#DIV/0!	0.086036	#DIV/0!			PRRC2C/2107	#DIV/0!	0.18935	#DIV/0!	0.00697582		KLHDC7B/5	#DIV/0!	#DIV/0!	#DIV/0!	0.0344831		F8WCV0	F8WCV0	Dynein assembly factor with WDR repeat domains 1	DAW1	10	30	49367.4	43780	55011.2	156910	29	29	2	1	29	29	2	1	2	1	1	0	1	0	266940	266940	1	1	4.22
		ZNF646/1723	0.428449	#DIV/0!	0.00560029	#DIV/0!			IRF9/171	#DIV/0!	0.297182	#DIV/0!	0.0361678		PI3/75	#DIV/0!	#DIV/0!	0.166668	#DIV/0!		Q13123;E7EQZ7;D6REL4;D6RAY9;D6RCQ4	Q13123;E7EQZ7;D6REL4	Protein Red	IK	101;102	42;48	2093125	2097525	202241	206353	3	3	4	4	3	3	4	4	4	4	18	19	4	4	36132000	1634400	22	37	65.601
		DAW1/30	0.469362	#DIV/0!	0.52302	#DIV/0!			IRF9/181	#DIV/0!	0.297182	#DIV/0!	0.0361678		ZBED5/143	#DIV/0!	#DIV/0!	0.0277771	#DIV/0!		M0QX27;M0R2E9;M0R0H5;M0QYR6;M0R1I2;Q03405-2;Q03405-3;Q03405	M0QX27;M0R2E9;M0R0H5;M0QYR6;M0R1I2;Q03405-2;Q03405-3;Q03405	Urokinase plasminogen activator surface receptor	PLAUR	91;116	68;70	19280	17145	11802.2	10572.2	9	9	4	4	9	9	4	4	4	4	4	5	4	4	357990	89497	4	9	8.9121
		METTL8/8	0.581394	#DIV/0!	0.171734	#DIV/0!			MNX1/38	#DIV/0!	0.437406	#DIV/0!	0.0421166								P06748;P06748-2;P06748-3	P06748;P06748-2;P06748-3	Nucleophosmin	NPM1	22	70	2608850	2640150	459058	436092	3	3	4	4	3	3	4	4	4	4	63	62	4	4	155470000	3580600	12	125	32.575
		TGIF2/60	0.581547	#DIV/0!	0.132873	#DIV/0!			USP54/124	#DIV/0!	0.449811	#DIV/0!	0.00809046								E5RI98	E5RI98	Nucleophosmin	NPM1			2033650	2368225	524648	535822	47	47	4	4	47	47	3	2	4	4	11	11	4	4	31025000	4241900	6	22	11.865
		TGIF2/68	0.581547	#DIV/0!	0.132873	#DIV/0!			BRCA1/283	#DIV/0!	0.503065	#DIV/0!	0.0354997								A0A075B6E9;A0A494C1A4;Q96NW7-2;Q96NW7	A0A075B6E9;A0A494C1A4;Q96NW7-2;Q96NW7	Leucine-rich repeat-containing protein 7	LRRC7	73;74	416;428	406031	145670	216.639	207.39	14	14	3	1	14	14	2	1	3	1	1	1	1	1	1971600	629.59	74	2	167.99
		TGIF2/69	0.581547	#DIV/0!	0.132873	#DIV/0!			SRCIN1/83	#DIV/0!	0.536431	#DIV/0!	0.0408325								A0A087WTE6	A0A087WTE6	SRC kinase-signaling inhibitor 1	SRCIN1	0	83	222700	214760	13018.3	16347.3	4	4	4	3	4	4	2	2	4	3	0	1	0	1	1860200	91972	17	1	32.068
		EIF4ENIF1/12	0.599905	#DIV/0!	0.1	#DIV/0!			HOXA10/56	#DIV/0!	0.543626	#DIV/0!	0.129408								A0A0A0MSN1;A0A494C182;E9PH68;E7EWN5;A0A0U1RRA9;Q5YLB2;P38398-8;P38398-4;P38398;P38398-7	A0A0A0MSN1;A0A494C182;E9PH68;E7EWN5;A0A0U1RRA9;Q5YLB2;P38398-8;P38398-4;P38398;P38398-7	Breast cancer type 1 susceptibility protein	BRCA1	75	283	157545	164397	12359.9	11600.9	4	4	2	3	4	4	2	3	2	3	0	1	0	1	1071400	59522	18	1	48.998
		EIF4ENIF1/15	0.599905	#DIV/0!	0.1	#DIV/0!			HOXA10/60	#DIV/0!	0.543626	#DIV/0!	0.129408								A0A0A0MSV2;Q7Z2W7-4;Q7Z2W7	A0A0A0MSV2;Q7Z2W7-4;Q7Z2W7	Transient receptor potential cation channel subfamily M member 8	TRPM8	76	281	2417150	#DIV/0!	98915	#DIV/0!	13	13	2	0	13	13	2	0	2	0	2	0	2	0	5737100	197830	29	2	87.058
		SHANK1/1459	0.718475	#DIV/0!	0.00781522	#DIV/0!			ECT2L/847	#DIV/0!	0.551525	#DIV/0!	0.0192307								A0A3B3IRX8;E7EV01;O15484	A0A3B3IRX8;E7EV01;O15484	Calpain-5	CAPN5	78;79	346;352	298155	260513	683.483	664.103	49	49	4	3	49	49	4	3	4	3	2	4	2	2	3694000	4726.2	29	6	58.379
		ATAT1/292	0.759195	#DIV/0!	0.0362625	#DIV/0!			PPIC/154	#DIV/0!	0.657418	#DIV/0!	0.0411553								A0A3B3IT29;A0A3B3ISF8;A0A3B3ISF0	A0A3B3IT29;A0A3B3ISF8;A0A3B3ISF0	La-related protein 1B	LARP1B	80	151	89906	69412	5096.45	3508.7	4	4	4	3	4	4	4	3	4	3	2	1	2	1	803710	30912	26	3	59.644
		TRPM8/281	0.842638	#DIV/0!	0.0344826	#DIV/0!			PLAUR/70	#DIV/0!	0.688084	#DIV/0!	0.424297								B0QYZ7;B1AKL4;Q9NRA8-2;Q9NRA8;Q9NRA8-3	B0QYZ7;B1AKL4;Q9NRA8-2;Q9NRA8;Q9NRA8-3	Eukaryotic translation initiation factor 4E transporter	EIF4ENIF1	2;3	12;15	105094	51401	17518.5	3268.75	25	25	2	2	25	25	2	2	2	2	2	0	2	0	415750	41575	10	2	26.034
		EIF2S2/2	0.911887	#DIV/0!	0.106851	#DIV/0!			ZMYM2/103	#DIV/0!	0.833188	#DIV/0!	0.0136796								C9J3F1;C9J6U8;C9JE69;B5ME25;E7ETE0;B3KW44;Q9H825	C9J3F1;C9J6U8;C9JE69;B5ME25;E7ETE0;B3KW44;Q9H825	Methyltransferase-like protein 8	METTL8	4	8	114895	114025	33938	34447.5	4	4	2	2	4	4	2	2	2	2	1	0	1	0	820630	136770	6	1	9.8062
		HMCN1/252	1.23043	#DIV/0!	0.00761219	#DIV/0!			KLF10/173	#DIV/0!	0.884006	#DIV/0!	0.0336908								E7EPN9;Q9Y520-3;Q9Y520-6;Q9Y520-4;Q9Y520-5;Q9Y520;Q9Y520-7;A0A2R8Y7F4;A0A2R8YET2;H7C5N8;Q9Y520-2	E7EPN9;Q9Y520-3;Q9Y520-6;Q9Y520-4;Q9Y520-5;Q9Y520;Q9Y520-7;A0A2R8Y7F4;A0A2R8YET2;H7C5N8;Q9Y520-2	Protein PRRC2C	PRRC2C	7	2107	20676.5	19459.5	169.88	716.905	97	97	4	2	97	97	4	2	4	2	1	4	1	2	317270	2113.3	100	5	308.77
		HMCN1/255	1.23043	#DIV/0!	0.00761219	#DIV/0!			OR2L3/131	#DIV/0!	0.902068	#DIV/0!	0.119929								F8VW64;G8JLA5	F8VW64;G8JLA5	RNA-binding protein Nova-1	NOVA1	86	19	635117	1520.7	147887	18675.8	59	59	3	4	59	59	3	4	3	4	1	0	1	0	3642400	85592	7	1	10.137
		TRA2B/101	1.49438	#DIV/0!	0.265894	#DIV/0!			SLIT1/323	#DIV/0!	1.32145	#DIV/0!	0.0434775								H0YMB0;Q00978	H0YMB0;Q00978	Interferon regulatory factor 9	IRF9	14;15	171;181	6916.8	618526	113.89	75276	63	63	1	4	63	63	1	4	1	4	0	1	0	1	4217000	301220	14	1	38.276
		NPM1/70	5.41429	#DIV/0!	0.952708	#DIV/0!			IK/42	#DIV/0!	2.9286	#DIV/0!	0.288114								H7C4M0	H7C4M0	Filamin A-interacting protein 1-like	FILIP1L	16;89	131;132	1179300	1193050	204630	221430	7	7	2	2	7	7	2	2	2	2	2	2	2	2	8521200	852120	10	4	16.098
																					H9KV90;Q9Y566-2;Q9Y566-3;Q9Y566	H9KV90;Q9Y566-2;Q9Y566-3;Q9Y566	SH3 and multiple ankyrin repeat domains protein 1	SHANK1	90	1459	3058550	3.30037e+06	33269.4	50366.3	17	17	4	3	17	17	4	3	4	3	3	0	3	0	28163000	2470.6	87	3	225.9
																					O15015-1;O15015	O15015-1;O15015	Zinc finger protein 646	ZNF646	17	1723	53389	19136	697.852	354.965	8	8	4	2	8	8	4	2	4	2	1	0	1	0	301120	3501.4	86	1	200.76
																					P19957	P19957	Elafin	PI3	26	75	#DIV/0!	#DIV/0!	96144	#DIV/0!	6	6	1	0	6	6	1	0	1	0	1	0	1	0	576860	96144	6	1	12.269
																					P20042	P20042	Eukaryotic translation initiation factor 2 subunit 2	EIF2S2	27	2	37313.5	40585.2	4372.25	5585.38	4	4	4	4	4	4	4	4	4	4	18	11	4	4	1510100	39830	20	29	38.388
																					P22680	P22680	Cholesterol 7-alpha-monooxygenase	CYP7A1	28;117	463;464	215100	230480	13839	15339.5	67	67	1	2	67	67	1	2	1	2	1	2	1	2	1246500	44518	28	3	57.66
																					P31260-2;P31260	P31260-2;P31260	Homeobox protein Hox-A10	HOXA10	32;93	56;60	107913	107382	25503.8	25562	8	8	4	4	8	8	4	4	4	4	0	1	0	1	1225600	204260	6	1	11.452
																					P45877	P45877	Peptidyl-prolyl cis-trans isomerase C	PPIC	95	154	229252	195418	4888.93	12233.4	7	7	4	4	7	7	4	4	4	4	6	4	3	3	3113100	30444	9	10	22.763
																					P62508-4;P62508-2;P62508-3;P62508;P62508-5	P62508-4;P62508-2;P62508-3;P62508;P62508-5	Estrogen-related receptor gamma	ESRRG	96;97	358;367	#DIV/0!	#DIV/0!	#DIV/0!	46584	8	8	0	1	8	8	0	1	0	1	0	1	0	1	791920	46584	17	1	44.072
																					P62995-3;P62995;H7BXF3;H7C2L4	P62995-3;P62995;H7BXF3	Transformer-2 protein homolog beta	TRA2B	99	101	64635	60065.5	11500.5	8433	12	12	4	4	12	12	4	4	4	4	24	22	4	4	2442200	79734	9	46	21.935
																					Q008S8	Q008S8	Epithelial cell-transforming sequence 2 oncogene-like	ECT2L	34	847	58683	145040	2118.45	5057.3	7	7	2	1	7	7	2	1	2	1	0	1	0	1	483300	9294.2	52	1	104.88
																					Q0VDF9;H7C2A1;B0YIZ1	Q0VDF9	Heat shock 70 kDa protein 14	HSPA14	100	63	190250	180692	13052.3	2900.53	45	45	4	4	45	45	4	4	4	4	21	24	4	4	4017200	63812	27	45	54.794
																					Q13118-2;Q13118	Q13118-2;Q13118	Krueppel-like factor 10	KLF10	37	173	106470	90937.7	6469.3	3465.78	6	6	2	3	6	6	2	3	2	3	0	1	0	1	536720	23336	23	1	51.423
																					Q49AG3	Q49AG3	Zinc finger BED domain-containing protein 5	ZBED5	41;42	143;147	#DIV/0!	#DIV/0!	13228	#DIV/0!	13	13	1	0	13	13	1	0	1	0	1	0	1	0	476220	13228	36	1	78.91
																					Q53TS8-4	Q53TS8-4	Amyotrophic lateral sclerosis 2 chromosomal region candidate gene 11 protein	ALS2CR11	43	744	92386.5	125380	1722.85	1860	5	5	4	4	5	5	4	4	4	4	1	2	1	2	1404500	14331	98	3	209.05
																					Q5SQI0-7;Q5SQI0-6;Q5SQI0-5;Q5SQI0-4;Q5SQI0-3;Q5SQI0-2;Q5SQI0	Q5SQI0-7;Q5SQI0-6;Q5SQI0-5;Q5SQI0-4;Q5SQI0-3;Q5SQI0-2;Q5SQI0	Alpha-tubulin N-acetyltransferase 1	ATAT1	46	292	50863	28256.2	2429.44	2343.41	4	4	4	4	4	4	4	4	4	4	1	0	1	0	362740	19091	19	1	33.99
																					Q5T0V2;Q5T0V4;Q5T0V0;O75093-2;O75093	Q5T0V2;Q5T0V4;Q5T0V0;O75093-2;O75093	Slit homolog 1 protein	SLIT1	19	323	56094.5	233130	5255.59	7670.3	36	36	2	1	36	36	2	1	2	1	0	1	0	1	418170	18182	23	1	45.037
																					Q70EL1-9;Q70EL1-10;Q70EL1-8;Q70EL1-7;Q70EL1	Q70EL1-9;Q70EL1-10;Q70EL1-8;Q70EL1-7;Q70EL1	Inactive ubiquitin carboxyl-terminal hydrolase 54	USP54	50;51;106	124;132;133	291204	1.26631e+06	68693	22776.3	115	115	4	4	115	115	4	4	4	4	0	1	0	1	13538000	365880	37	1	79.77
																					Q8N488	Q8N488	RING1 and YY1-binding protein	RYBP	108;120	70;72	358210	731296	90303.1	110108	54	54	4	4	54	54	4	4	4	4	1	2	1	2	8016300	801630	10	3	24.821
																					Q8NG85	Q8NG85	Olfactory receptor 2L3	OR2L3	121	131	91984.3	94987.8	15137	12628.6	4	4	3	4	4	4	3	4	3	4	0	2	0	1	1109400	13654	7	2	35.282
																					Q96G42	Q96G42	Kelch domain-containing protein 7B	KLHDC7B	55	5	#DIV/0!	#DIV/0!	#DIV/0!	7834.9	4	4	0	1	4	4	0	1	0	1	0	1	0	1	227210	7834.9	29	1	63.313
																					Q96RW7-2;Q96RW7	Q96RW7-2;Q96RW7	Hemicentin-1	HMCN1	56;57	252;255	690938	764882	4274.55	4094.8	1	1	4	4	1	1	4	4	4	4	1	0	1	0	8503200	33477	254	1	600.09
		Gene names/loclalized P-position	ratio LFQ/Ppep Int without PPase	ratio LFQ/Ppep Int with PPase	ratio iBAQ/Ppep Int without PPase	ratio iBAQ/Ppep Int with PPase															Q9UBW7;A0A087X151;Q9UBW7-2	Q9UBW7	Zinc finger MYM-type protein 2	ZMYM2	64	103	294452	458995	7797.45	7535.98	14	14	4	4	14	14	4	4	4	4	1	2	1	2	3966800	61334	63	3	154.91
		ALS2CR11/744	0.664269	0.655512	0.0123875	0.00972447															Q9Y253	Q9Y253	DNA polymerase eta	POLH	112	692	259168	243680	11362.1	10711	4	4	4	2	4	4	4	2	4	2	1	1	1	1	2139900	66871	32	2	78.413
		POLH/692	0.653144	0.636024	0.0286345	0.0279564															S4R364	S4R364	Motor neuron and pancreas homeobox protein 1	MNX1	69	38	134699	770490	123535	74188.3	5	5	3	3	5	5	3	3	3	3	0	1	0	1	4745400	593180	8	1	14.763
		FILIP1L/131	0.576308	0.538793	0.1	0.1															U3KQB5	U3KQB5	Homeobox protein TGIF2	TGIF2	70;71;72	60;68;69	196016	43608.6	44786.3	34481.2	5	5	3	4	5	5	3	4	3	4	1	0	1	0	1361400	272280	5	1	10.168
		FILIP1L/132	0.576308	0.538793	0.1	0.1															Q09666;E9PQE3;E9PJZ0;E9PKR9;E9PJC6;E9PLK4;Q09666-2	Q09666	Neuroblast differentiation-associated protein AHNAK	AHNAK	36	5752	500520	513908	20519.5	19566.8	649	651	4	4	649	651	4	4	4	4	625	621	4	4	176310000	160340	376	1246	629.09
		CYP7A1/463	0.555111	0.536618	0.0357145	0.0357144															P23528;E9PP50;G3V1A4;E9PK25;E9PQB7;E9PS23;E9PLJ3	P23528;E9PP50;G3V1A4;E9PK25;E9PQB7	Cofilin-1	CFL1	29	3	4086750	3956900	1.41421e+06	1369035	44	44	4	4	44	44	4	4	4	4	87	81	4	4	184710000	11133000	10	168	18.502
		CYP7A1/464	0.555111	0.536618	0.0357145	0.0357144															Q9Y281;Q9Y281-3;F8WDN3;G3V2U0	Q9Y281;Q9Y281-3	Cofilin-2	CFL2	67	3	1723050	1572975	410485	387872	104	104	4	4	104	104	4	4	4	4	56	53	4	4	70812000	3193400	11	109	18.736
		LARP1B/151	0.616534	0.443216	0.0349491	0.0224041															P35606-2;P35606;H0Y938;D6RBZ7;D6RCL6;D6RBG7;D6RBT6;D6R997;H0YAC7	P35606-2;P35606	Coatomer subunit beta	COPB2	33;94	830;832	132592	126098	15283.5	12259	67	67	4	4	67	67	4	4	4	4	92	83	4	4	12750000	110170	49	175	99.045
		RYBP/72	0.206879	0.342199	0.0521531	0.0515232															A0A0C4DG89;D6RJA6	A0A0C4DG89	Probable ATP-dependent RNA helicase DDX46	DDX46	1	804	215935	215205	13347.9	14811.8	6	6	4	4	6	6	4	4	4	4	67	67	4	4	9799100	112640	53	134	117.46
		RYBP/70	0.206879	0.342199	0.0521531	0.0515232															Q7L014	Q7L014	Probable ATP-dependent RNA helicase DDX46	DDX46	1	804	214872	216262	12802.4	14282.1	71	71	4	4	71	71	4	4	4	4	65	66	4	4	9549400	108340	53	131	117.36
																					P31150;G5E9U5	P31150	Rab GDP dissociation inhibitor alpha	GDI1	92	205	250222	249812	31770.2	31916.2	20	20	4	4	20	20	4	4	4	4	75	68	4	4	18727000	254740	25	143	50.582
																					P11717;S4R328	P11717	Cation-independent mannose-6-phosphate receptor	IGF2R	25	2484	39454.2	38861	934.827	901.628	33	33	4	4	33	33	4	4	4	4	15	16	4	4	1527300	7345.8	127	31	274.37
																					Q969P0-3;Q969P0;C9J8Z4;Q969P0-2	Q969P0-3;Q969P0;C9J8Z4;Q969P0-2	Immunoglobulin superfamily member 8	IGSF8	54	156	85414.2	119089	521.543	2673.19	6	6	4	4	6	6	4	4	4	4	3	1	3	1	975130	3947.6	26	4	55.807
																					Q8N3X6-3;A0A1B0GWC6;D6RA10;A0A1B0GVP4;Q8N3X6	Q8N3X6-3;A0A1B0GWC6;D6RA10;A0A1B0GVP4;Q8N3X6	Ligand-dependent nuclear receptor corepressor-like protein	LCORL	53	272	188960	563248	47547.3	54062.1	61	61	4	4	61	61	4	4	4	4	1	1	1	1	5505000	406430	13	2	35.407
																					Q9HCC0-2;Q9HCC0;D6RD67;A0A0G2JM88;D6R9R1;D6RDF7	Q9HCC0-2;Q9HCC0;D6RD67	Methylcrotonoyl-CoA carboxylase beta chain, mitochondrial	MCCC2	111	367	188930	169755	19190.5	16732.5	7	7	4	4	7	7	4	4	4	4	40	39	4	4	6679100	143690	26	79	57.518
																					Q5SWX8-3;Q5SWX8-4;Q5SWX8;Q5SWX8-2	Q5SWX8-3;Q5SWX8-4;Q5SWX8;Q5SWX8-2	Protein odr-4 homolog	ODR4	47;48;104	258;264;278	61704	54919.3	1155.77	1020.02	16	16	4	3	16	16	4	3	4	3	4	2	3	2	795280	7683.1	19	6	37.773
																					Q9UQ80;Q9UQ80-2;F8VR77;H0YIN7;F8W0A3;F8VZ69	Q9UQ80;Q9UQ80-2	Proliferation-associated protein 2G4	PA2G4	65	2	623432	640418	122266	104928	245	245	4	4	245	245	4	4	4	4	79	81	4	4	36070000	908790	22	160	43.786
																					P62937;F8WE65;C9J5S7;P62937-2;E5RIZ5;P0DN26;A0A0H2UH34;A0A0B4J2A2;A0A075B767;A0A075B759;Q9Y536;F5H284	P62937;F8WE65;C9J5S7;P62937-2	Peptidyl-prolyl cis-trans isomerase A;Peptidyl-prolyl cis-trans isomerase A, N-terminally processed;Peptidyl-prolyl cis-trans isomerase	PPIA	98	107	3454700	3430375	1374885	1.23415e+06	65	65	4	4	65	65	4	4	4	4	103	106	4	4	216810000	10436000	10	209	18.012
																					Q08945;A0A0U1RRK2;E9PMD4	Q08945	FACT complex subunit SSRP1	SSRP1	35	444	114470	113605	20822	24224.8	11	11	4	4	11	11	4	4	4	4	42	52	4	4	9093600	180190	30	94	81.074
																					O43399;O43399-5;O43399-7;A0A087WYR3;O43399-2;O43399-4;O43399-3;A0A087WZ51;O43399-6	O43399;O43399-5;O43399-7;A0A087WYR3;O43399-2;O43399-4;O43399-3;A0A087WZ51;O43399-6	Tumor protein D54	TPD52L2	18	166	528325	446488	50933.2	48263.8	15	15	4	4	15	15	4	4	4	4	47	41	4	4	18817000	396790	12	88	22.237
																					P08670;B0YJC4;B0YJC5;A0A1B0GTT5;A0A1B0GVG8;P41219;P41219-2;H7C5W5;Q16352;P07197-2;P07197;F8W835;E7EMV2;E7ESP9;P07196;P12036-2;P12036	P08670;B0YJC4	Vimentin	VIM	23;24	55;56	3849150	4036150	799335	763428	7	7	4	4	7	7	4	4	4	4	406	404	4	4	609590000	6251100	34	810	53.651
																					Q5JSH3-2;Q5JSH3;H7BY83;Q5JSH3-4;Q5JSH3-3	Q5JSH3-2;Q5JSH3;H7BY83;Q5JSH3-4	WD repeat-containing protein 44	WDR44	119	44	1426625	1.42083e+06	53706.2	248.4	35	35	4	3	35	35	4	3	4	3	1	2	1	2	11889000	215570	55	3	100.4
[truncated: 60 more columns]

## Sheet: 05-P-peptides without Intensity
Proteins	Leading proteins	Protein	Protein names	Gene names	Sequence window	Phospho (STY) Probabilities	Positions within proteins	Positions	Gene names, positions		P-peptides wo Intensity (median, n=4) w/o PPAse	P-peptides wo Intensity (median, n=4) with PPAse	Unique identifier	Number of Phospho (STY)	Position	Position in peptide	Amino acid	Charge	Peptide window coverage	Best localization raw file	Protein group IDs	Multiplicity	Localization prob	PEP	Score	Delta score	Score for localization	Mass error [ppm]	Intensity	id	Peptide IDs	Mod. peptide IDs	Diagnostic peak
Q49AG3	Q49AG3	Q49AG3	Zinc finger BED domain-containing protein 5	ZBED5	PHAQCVLCKKILSNSSLAPSKLRRHLETKHA	ILS(0.001)NS(0.432)S(0.784)LAPS(0.784)KLRR	143	143	ZBED5_(143)		NaN	NaN	UID42	2	143	6	S	2	XXXXXXXXXXPPPPPPPPPPPPPPXXXXXXX	22-Prot-0049_RD4_1_7926_-PPAse H	3087	___1	0.783555	0.00830392	51.531	24.153	51.531	7.9286	476220	41	10933	11381
Q49AG3	Q49AG3	Q49AG3	Zinc finger BED domain-containing protein 5	ZBED5	CVLCKKILSNSSLAPSKLRRHLETKHAAYKD	ILS(0.001)NS(0.432)S(0.784)LAPS(0.784)KLRR	147	147	ZBED5_(147)		NaN	NaN	UID43	2	147	10	S	2	XXXXXXPPPPPPPPPPPPPPXXXXXXXXXXX	22-Prot-0049_RD4_1_7926_-PPAse H	3087	___1	0.783555	0.00830392	51.531	24.153	51.531	7.9286	476220	42	10933	11381
A0A075B6E9;A0A494C1A4;Q96NW7-2;Q96NW7	A0A075B6E9	A0A075B6E9	Leucine-rich repeat-containing protein 7	LRRC7	LWLSDNQSKALIPLQTEAHPETKQRVLTNYM	ALIPLQT(0.986)EAHPET(0.014)KQRVLT(0.55)NY(0.45)MFPQQPR	416;449;411;411	416	LRRC7_(416)		NaN	NaN	UID74	2	416	7	T	4	XXXXXXXXXPPPPPPPPPPPPPPPPPPPPPP	22-Prot-0049_RD4_1_7926_-PPAse H	10	___1	0.986293	0.00919533	48.201	26.533	48.201	-6.9737	1699600	73	1649	1737
O15015-1;O15015	O15015-1	O15015-1	Zinc finger protein 646	ZNF646	LCPKLLPNLLSLKNHSRTHTDPKRHCCSICG	LLPNLLS(0.001)LKNHS(0.999)R	1723;1723	1723	ZNF646_(1723)		NaN	NaN	UID140	1	1723	12	S	3	XXXXPPPPPPPPPPPPPXXXXXXXXXXXXXX	22-Prot-0049_RD4_1_7926_-PPAse H	1561	___2	0.999074	0.0183558	50.297	29.146	50.297	9.4937	124610	17	15177	15839
P35606-2;P35606;H0YAC7	P35606-2	P35606-2	Coatomer subunit beta'	COPB2	PSRSTAQQELDGKPASPTPVIVASHTANKEE	S(0.002)T(0.002)AQQELDGKPAS(0.801)PT(0.17)PVIVAS(0.016)HT(0.009)ANKEEK	830;859;73	830	COPB2_(830)		NaN	NaN	UID156	1	830	13	S	4	XXXPPPPPPPPPPPPPPPPPPPPPPPPPPPP	22-Prot-0049_RD4_1_7926_-PPAse H	2323	___2	0.801107	0.00031884	48.801	43.224	41.152	-0.12709	175250	33	23626	24782
Q5JSH3-2;Q5JSH3	Q5JSH3-2	Q5JSH3-2	WD repeat-containing protein 44	WDR44	GKVGLSTFKETENTAYKVGNESPVQELKQDV	VGLSTFKETENT(0.003)AY(0.997)K	44;44	44	WDR44_(44)		NaN	NaN	UID242	1	44	14	Y	2	XXPPPPPPPPPPPPPPPXXXXXXXXXXXXXX	22-Prot-0049_RD4_1_7926_-PPAse H	3124	___2	0.996567	0.00625878	48.701	24.012	48.701	-0.84099	6449000	119	27025	28352
O15015-1;O15015	O15015-1	O15015-1	Zinc finger protein 646	ZNF646	LCPKLLPNLLSLKNHSRTHTDPKRHCCSICG	LLPNLLS(0.001)LKNHS(0.999)R	1723;1723	1723	ZNF646_(1723)		NaN	NaN	UID262	1	1723	12	S	3	XXXXPPPPPPPPPPPPPXXXXXXXXXXXXXX	22-Prot-0049_RD4_1_7926_-PPAse H	1561	___3	0.999074	0.0183558	50.297	29.146	50.297	9.4937	124610	17	15177	15839
P35606-2;P35606;H0YAC7	P35606-2	P35606-2	Coatomer subunit beta'	COPB2	PSRSTAQQELDGKPASPTPVIVASHTANKEE	S(0.002)T(0.002)AQQELDGKPAS(0.801)PT(0.17)PVIVAS(0.016)HT(0.009)ANKEEK	830;859;73	830	COPB2_(830)		NaN	NaN	UID278	1	830	13	S	4	XXXPPPPPPPPPPPPPPPPPPPPPPPPPPPP	22-Prot-0049_RD4_1_7926_-PPAse H	2323	___3	0.801107	0.00031884	48.801	43.224	41.152	-0.12709	175250	33	23626	24782
Q49AG3	Q49AG3	Q49AG3	Zinc finger BED domain-containing protein 5	ZBED5	PHAQCVLCKKILSNSSLAPSKLRRHLETKHA	ILS(0.001)NS(0.432)S(0.784)LAPS(0.784)KLRR	143	143	ZBED5_(143)		NaN	NaN	UID286	2	143	6	S	2	XXXXXXXXXXPPPPPPPPPPPPPPXXXXXXX	22-Prot-0049_RD4_1_7926_-PPAse H	3087	___3	0.783555	0.00830392	51.531	24.153	51.531	7.9286	476220	41	10933	11381
Q49AG3	Q49AG3	Q49AG3	Zinc finger BED domain-containing protein 5	ZBED5	CVLCKKILSNSSLAPSKLRRHLETKHAAYKD	ILS(0.001)NS(0.432)S(0.784)LAPS(0.784)KLRR	147	147	ZBED5_(147)		NaN	NaN	UID287	2	147	10	S	2	XXXXXXPPPPPPPPPPPPPPXXXXXXXXXXX	22-Prot-0049_RD4_1_7926_-PPAse H	3087	___3	0.783555	0.00830392	51.531	24.153	51.531	7.9286	476220	42	10933	11381
A0A075B6E9;A0A494C1A4;Q96NW7-2;Q96NW7	A0A075B6E9	A0A075B6E9	Leucine-rich repeat-containing protein 7	LRRC7	LWLSDNQSKALIPLQTEAHPETKQRVLTNYM	ALIPLQT(0.986)EAHPET(0.014)KQRVLT(0.55)NY(0.45)MFPQQPR	416;449;411;411	416	LRRC7_(416)		NaN	NaN	UID318	2	416	7	T	4	XXXXXXXXXPPPPPPPPPPPPPPPPPPPPPP	22-Prot-0049_RD4_1_7926_-PPAse H	10	___3	0.986293	0.00919533	48.201	26.533	48.201	-6.9737	1699600	73	1649	1737
Q5JSH3-2;Q5JSH3	Q5JSH3-2	Q5JSH3-2	WD repeat-containing protein 44	WDR44	GKVGLSTFKETENTAYKVGNESPVQELKQDV	VGLSTFKETENT(0.003)AY(0.997)K	44;44	44	WDR44_(44)		NaN	NaN	UID364	1	44	14	Y	2	XXPPPPPPPPPPPPPPPXXXXXXXXXXXXXX	22-Prot-0049_RD4_1_7926_-PPAse H	3124	___3	0.996567	0.00625878	48.701	24.012	48.701	-0.84099	6449000	119	27025	28352
A0A0C4DG89;Q7L014	A0A0C4DG89;Q7L014	A0A0C4DG89	Probable ATP-dependent RNA helicase DDX46	DDX46	NERKKLQKAALGLQDSDDEDAAVDIDEQIES	AALGLQDS(1)DDEDAAVDIDEQIESMFNSK	804;804	804;804	DDX46_(804;804)		NaN	NaN	UID124	1	804	8	S	3	XXXXXXXXPPPPPPPPPPPPPPPPPPPPPPP	22-Prot-0049_RD4_1_7927_-PPAse H	244;3271	___2	1	3.58839e-05	81.031	79.393	81.031	0.79998	121040	1	218	229
P06748;P06748-2;P06748-3	P06748	P06748	Nucleophosmin	NPM1	DELHIVEAEAMNYEGSPIKVTLATLKMSVQP	TVSLGAGAKDELHIVEAEAMNY(0.015)EGS(0.981)PIKVT(0.003)LATLK	70;70;70	70	NPM1_(70)		NaN	NaN	UID145	1	70	25	S	4	PPPPPPPPPPPPPPPPPPPPPPPPPPXXXXX	22-Prot-0049_RD4_1_7927_-PPAse H	1946	___2	0.981035	3.73954e-147	208.7	196.01	208.7	2.0806	1453600	22	26169	27450
P11717	P11717	P11717	Cation-independent mannose-6-phosphate receptor	IGF2R	QKTVSSTKLVSFHDDSDEDLLHI________	LVS(0.002)FHDDS(0.998)DEDLLHI	2484	2484	IGF2R_(2484)		NaN	NaN	UID148	1	2484	8	S	3	XXXXXXXXPPPPPPPPPPPPPPPXXXXXXXX	22-Prot-0049_RD4_1_7927_-PPAse H	2042	___2	0.997643	0.0497458	42.941	40.462	42.941	-1.8419	43768	25	16854	17598
P20042	P20042	P20042	Eukaryotic translation initiation factor 2 subunit 2	EIF2S2	______________MSGDEMIFDPTMSKKKK	S(1)GDEMIFDPTMSK	2	2	EIF2S2_(2)		NaN	NaN	UID150	1	2	1	S	2	XXXXXXXXXXXXXXXPPPPPPPPPPPPPXXX	22-Prot-0049_RD4_1_7927_-PPAse H	2147	___2	0.999986	0.00180633	52.201	50.1	52.201	0.62249	40919	27	22047;22048	23124;23127
Q5SQI0-7;Q5SQI0-6;Q5SQI0-5;Q5SQI0-4;Q5SQI0-3;Q5SQI0-2;Q5SQI0	Q5SQI0-7	Q5SQI0-7	Alpha-tubulin N-acetyltransferase 1	ATAT1	PHPTARLLLAADPGGSPAQRRRTR_______	LLLAADPGGS(1)PAQRRR	292;292;315;315;292;303;315	292	ATAT1_(292)		NaN	NaN	UID169	1	292	10	S	2	XXXXXXPPPPPPPPPPPPPPPPXXXXXXXXX	22-Prot-0049_RD4_1_7927_-PPAse H	3139	___2	1	0.0157122	43.306	20.408	43.306	9.9273	66996	46	15048	15707
A0A0A0MSV2;Q7Z2W7-4;Q7Z2W7	A0A0A0MSV2	A0A0A0MSV2	Transient receptor potential cation channel subfamily M member 8	TRPM8	RNLQIAKNSYNDALLTFVWKLVANFRRGFRK	NLQIAKNS(0.006)Y(0.005)NDALLT(0.99)FVWK	281;210;522	281	TRPM8_(281)		NaN	NaN	UID199	1	281	15	T	3	XPPPPPPPPPPPPPPPPPPPXXXXXXXXXXX	22-Prot-0049_RD4_1_7927_-PPAse H	193	___2	0.98968	0.000847227	54.199	39.791	54.199	9.1252	5737100	76	19187	20137
F8VW64;G8JLA5	F8VW64	F8VW64	RNA-binding protein Nova-1	NOVA1	NVAKTEPVSILQPQTTVNPDRIKQTLPSSPT	MPQNVAKTEPVSILQPQT(0.118)T(0.881)VNPDRIK	19;19	19	NOVA1_(19)		NaN	NaN	UID209	1	19	19	T	4	PPPPPPPPPPPPPPPPPPPPPPPXXXXXXXX	22-Prot-0049_RD4_1_7927_-PPAse H	1116	___2	0.881281	0.0241941	47.491	28.778	47.491	-5.2064	1718900	86	18090	18961
H9KV90;Q9Y566-2;Q9Y566-3;Q9Y566	H9KV90	H9KV90	SH3 and multiple ankyrin repeat domains protein 1	SHANK1	SPPAARRSLLHRLPPTAPGVGPLLLQLGTEP	LPPT(0.993)APGVGPLLLQLGT(0.004)EPPAPHPGVS(0.002)KPWR	1459;838;1442;1451	1459	SHANK1_(1459)		NaN	NaN	UID213	1	1459	4	T	4	XXXXXXXXXXXXPPPPPPPPPPPPPPPPPPP	22-Prot-0049_RD4_1_7927_-PPAse H	1341	___2	0.993422	0.00982534	44.667	18.377	44.667	7.6097	8514000	90	15716	16403
Q0VDF9;H7C2A1;B0YIZ1	Q0VDF9	Q0VDF9	Heat shock 70 kDa protein 14	HSPA14	VGLAAKQSRIRNISNTVMKVKQILGRSSSDP	IRNIS(0.034)NT(0.966)VMKVK	63;52;63	63	HSPA14_(63)		NaN	NaN	UID223	1	63	7	T	2	XXXXXXXXXPPPPPPPPPPPPXXXXXXXXXX	22-Prot-0049_RD4_1_7927_-PPAse H	2807	___2	0.965846	0.045935	47.561	15.013	40.386	8.0831	1168200	100	11439	11923
A0A0C4DG89;Q7L014	A0A0C4DG89;Q7L014	A0A0C4DG89	Probable ATP-dependent RNA helicase DDX46	DDX46	NERKKLQKAALGLQDSDDEDAAVDIDEQIES	AALGLQDS(1)DDEDAAVDIDEQIESMFNSK	804;804	804;804			NaN	NaN	UID246	1	804	8	S	3	XXXXXXXXPPPPPPPPPPPPPPPPPPPPPPP	22-Prot-0049_RD4_1_7927_-PPAse H	244;3271	___3	1	3.58839e-05	81.031	79.393	81.031	0.79998	121040	1	218	229
P06748;P06748-2;P06748-3	P06748	P06748	Nucleophosmin	NPM1	DELHIVEAEAMNYEGSPIKVTLATLKMSVQP	TVSLGAGAKDELHIVEAEAMNY(0.015)EGS(0.981)PIKVT(0.003)LATLK	70;70;70	70			NaN	NaN	UID267	1	70	25	S	4	PPPPPPPPPPPPPPPPPPPPPPPPPPXXXXX	22-Prot-0049_RD4_1_7927_-PPAse H	1946	___3	0.981035	3.73954e-147	208.7	196.01	208.7	2.0806	1453600	22	26169	27450
P11717	P11717	P11717	Cation-independent mannose-6-phosphate receptor	IGF2R	QKTVSSTKLVSFHDDSDEDLLHI________	LVS(0.002)FHDDS(0.998)DEDLLHI	2484	2484			NaN	NaN	UID270	1	2484	8	S	3	XXXXXXXXPPPPPPPPPPPPPPPXXXXXXXX	22-Prot-0049_RD4_1_7927_-PPAse H	2042	___3	0.997643	0.0497458	42.941	40.462	42.941	-1.8419	43768	25	16854	17598
P20042	P20042	P20042	Eukaryotic translation initiation factor 2 subunit 2	EIF2S2	______________MSGDEMIFDPTMSKKKK	S(1)GDEMIFDPTMSK	2	2			NaN	NaN	UID272	1	2	1	S	2	XXXXXXXXXXXXXXXPPPPPPPPPPPPPXXX	22-Prot-0049_RD4_1_7927_-PPAse H	2147	___3	0.999986	0.00180633	52.201	50.1	52.201	0.62249	40919	27	22047;22048	23124;23127
Q5SQI0-7;Q5SQI0-6;Q5SQI0-5;Q5SQI0-4;Q5SQI0-3;Q5SQI0-2;Q5SQI0	Q5SQI0-7	Q5SQI0-7	Alpha-tubulin N-acetyltransferase 1	ATAT1	PHPTARLLLAADPGGSPAQRRRTR_______	LLLAADPGGS(1)PAQRRR	292;292;315;315;292;303;315	292			NaN	NaN	UID291	1	292	10	S	2	XXXXXXPPPPPPPPPPPPPPPPXXXXXXXXX	22-Prot-0049_RD4_1_7927_-PPAse H	3139	___3	1	0.0157122	43.306	20.408	43.306	9.9273	66996	46	15048	15707
A0A0A0MSV2;Q7Z2W7-4;Q7Z2W7	A0A0A0MSV2	A0A0A0MSV2	Transient receptor potential cation channel subfamily M member 8	TRPM8	RNLQIAKNSYNDALLTFVWKLVANFRRGFRK	NLQIAKNS(0.006)Y(0.005)NDALLT(0.99)FVWK	281;210;522	281			NaN	NaN	UID321	1	281	15	T	3	XPPPPPPPPPPPPPPPPPPPXXXXXXXXXXX	22-Prot-0049_RD4_1_7927_-PPAse H	193	___3	0.98968	0.000847227	54.199	39.791	54.199	9.1252	5737100	76	19187	20137
F8VW64;G8JLA5	F8VW64	F8VW64	RNA-binding protein Nova-1	NOVA1	NVAKTEPVSILQPQTTVNPDRIKQTLPSSPT	MPQNVAKTEPVSILQPQT(0.118)T(0.881)VNPDRIK	19;19	19			NaN	NaN	UID331	1	19	19	T	4	PPPPPPPPPPPPPPPPPPPPPPPXXXXXXXX	22-Prot-0049_RD4_1_7927_-PPAse H	1116	___3	0.881281	0.0241941	47.491	28.778	47.491	-5.2064	1718900	86	18090	18961
H9KV90;Q9Y566-2;Q9Y566-3;Q9Y566	H9KV90	H9KV90	SH3 and multiple ankyrin repeat domains protein 1	SHANK1	SPPAARRSLLHRLPPTAPGVGPLLLQLGTEP	LPPT(0.993)APGVGPLLLQLGT(0.004)EPPAPHPGVS(0.002)KPWR	1459;838;1442;1451	1459			NaN	NaN	UID335	1	1459	4	T	4	XXXXXXXXXXXXPPPPPPPPPPPPPPPPPPP	22-Prot-0049_RD4_1_7927_-PPAse H	1341	___3	0.993422	0.00982534	44.667	18.377	44.667	7.6097	8514000	90	15716	16403
Q0VDF9;H7C2A1;B0YIZ1	Q0VDF9	Q0VDF9	Heat shock 70 kDa protein 14	HSPA14	VGLAAKQSRIRNISNTVMKVKQILGRSSSDP	IRNIS(0.034)NT(0.966)VMKVK	63;52;63	63			NaN	NaN	UID345	1	63	7	T	2	XXXXXXXXXPPPPPPPPPPPPXXXXXXXXXX	22-Prot-0049_RD4_1_7927_-PPAse H	2807	___3	0.965846	0.045935	47.561	15.013	40.386	8.0831	1168200	100	11439	11923
B0QYZ7;B1AKL4;Q9NRA8-2;Q9NRA8;Q9NRA8-3	B0QYZ7	B0QYZ7	Eukaryotic translation initiation factor 4E transporter	EIF4ENIF1	____QKAKVDLKPLLSSLSANKEKLKESSHS	VDLKPLLS(1)SLS(1)ANK	12;414;251;414;414	12	EIF4ENIF1_(12)		NaN	NaN	UID3	2	12	8	S	2	XXXXXXXXPPPPPPPPPPPPPPXXXXXXXXX	22-Prot-0051_RD6_1_7934_-PPAse U	566	___1	0.999683	0.000785724	57.888	17.355	57.888	9.9838	350370	2	26605	27906;27907
B0QYZ7;B1AKL4;Q9NRA8-2;Q9NRA8;Q9NRA8-3	B0QYZ7	B0QYZ7	Eukaryotic translation initiation factor 4E transporter	EIF4ENIF1	_QKAKVDLKPLLSSLSANKEKLKESSHSGVV	VDLKPLLS(1)SLS(1)ANK	15;417;254;417;417	15	EIF4ENIF1_(15)		NaN	NaN	UID4	2	15	11	S	2	XXXXXPPPPPPPPPPPPPPXXXXXXXXXXXX	22-Prot-0051_RD6_1_7934_-PPAse U	566	___1	0.999978	0.000785724	57.888	17.355	57.888	9.9838	350370	3	26605	27906;27907
Q5SWX8-3;Q5SWX8-4;Q5SWX8	Q5SWX8-3	Q5SWX8-3	Protein odr-4 homolog	ODR4	NSDHRSTATVQICSGSVNLKGAVKCRAYIHS	VLT(0.987)QLLLNS(0.467)DHRS(0.219)T(0.219)AT(0.104)VQICS(0.006)GS(0.998)VNLKGAVK	278;246;278	278	ODR4_(278)		NaN	NaN	UID49	3	278	23	S	4	PPPPPPPPPPPPPPPPPPPPPPPPXXXXXXX	22-Prot-0051_RD6_1_7934_-PPAse U	3143	___1	0.998394	0.024849	43.727	26.212	43.727	6.9938	141290	48	27881	29249
U3KQB5	U3KQB5	U3KQB5	Homeobox protein TGIF2	TGIF2	SGQTNLSVLQRVFYGSLPNIGIISSVQRSST	VFY(0.021)GS(0.989)LPNIGIIS(0.995)S(0.995)VQR	60	60	TGIF2_(60)		NaN	NaN	UID71	3	60	5	S	2	XXXXXXXXXXXPPPPPPPPPPPPPPPPPXXX	22-Prot-0051_RD6_1_7934_-PPAse U	4515	___1	0.989017	0.00634998	40.861	15.273	40.861	9.3157	337060	70	26919	28239
U3KQB5	U3KQB5	U3KQB5	Homeobox protein TGIF2	TGIF2	LQRVFYGSLPNIGIISSVQRSSTGRCQLAPL	VFY(0.021)GS(0.989)LPNIGIIS(0.995)S(0.995)VQR	68	68	TGIF2_(68)		NaN	NaN	UID72	3	68	13	S	2	XXXPPPPPPPPPPPPPPPPPXXXXXXXXXXX	22-Prot-0051_RD6_1_7934_-PPAse U	4515	___1	0.994819	0.00634998	40.861	15.273	40.861	9.3157	337060	71	26919	28239
U3KQB5	U3KQB5	U3KQB5	Homeobox protein TGIF2	TGIF2	QRVFYGSLPNIGIISSVQRSSTGRCQLAPLH	VFY(0.021)GS(0.989)LPNIGIIS(0.995)S(0.995)VQR	69	69	TGIF2_(69)		NaN	NaN	UID73	3	69	14	S	2	XXPPPPPPPPPPPPPPPPPXXXXXXXXXXXX	22-Prot-0051_RD6_1_7934_-PPAse U	4515	___1	0.994819	0.00634998	40.861	15.273	40.861	9.3157	337060	72	26919	28239
Q5SWX8-3;Q5SWX8-4;Q5SWX8	Q5SWX8-3	Q5SWX8-3	Protein odr-4 homolog	ODR4	GNTQATSHSFDVRVLTQLLLNSDHRSTATVQ	VLT(0.987)QLLLNS(0.467)DHRS(0.219)T(0.219)AT(0.104)VQICS(0.006)GS(0.998)VNLKGAVK	258;226;258	258	ODR4_(258)		NaN	NaN	UID105	3	258	3	T	4	XXXXXXXXXXXXXPPPPPPPPPPPPPPPPPP	22-Prot-0051_RD6_1_7934_-PPAse U	3143	___1	0.986801	0.024849	43.727	26.212	43.727	6.9938	141290	104	27881	29249
C9J3F1;C9J6U8;C9JE69;B5ME25;E7ETE0;B3KW44;Q9H825	C9J3F1	C9J3F1	Methyltransferase-like protein 8	METTL8	________MNMIWRNSISCLRLGKVPHRYQS	NMIWRNS(0.995)IS(0.005)CLR	8;8;8;8;8;8;8	8	METTL8_(8)		NaN	NaN	UID127	1	8	7	S	2	XXXXXXXXXPPPPPPPPPPPPXXXXXXXXXX	22-Prot-0051_RD6_1_7934_-PPAse U	596	___2	0.995368	0.0347098	47.361	9.2614	47.361	1.2843	197620	4	19291	20245
F8WCV0	F8WCV0	F8WCV0	Dynein assembly factor with WDR repeat domains 1	DAW1	FGEPNHMQVSKILLNSRNYVGI_________	ILLNS(0.968)RNY(0.032)VGI	30	30	DAW1_(30)		NaN	NaN	UID133	1	30	5	S	2	XXXXXXXXXXXPPPPPPPPPPPXXXXXXXXX	22-Prot-0051_RD6_1_7934_-PPAse U	1145	___2	0.967858	0.0479418	62.969	37.715	62.969	0.83538	105180	10	10847	11292
O43399;O43399-5;O43399-7;O43399-2;O43399-4;O43399-3;A0A087WZ51;O43399-6	O43399	O43399	Tumor protein D54	TPD52L2	ISRKLGDMRNSATFKSFEDRVGTIKSKVVGD	NSAT(0.001)FKS(0.987)FEDRVGT(0.012)IK	166;180;189;146;160;169;112;123	166	TPD52L2_(166)		NaN	NaN	UID141	1	166	7	S	3	XXXXXXXXXPPPPPPPPPPPPPPPPXXXXXX	22-Prot-0051_RD6_1_7934_-PPAse U	1621	___2	0.9871	0.0383584	78.925	70.513	78.925	0.49188	122700	18	19488	20453
P08670;B0YJC4;A0A1B0GTT5;A0A1B0GVG8	P08670	P08670	Vimentin	VIM	GSALRPSTSRSLYASSPGGVYATRSSAVRLR	SLYAS(0.083)S(0.917)PGGVYATR	56;56;56;56	56	VIM_(56)		NaN	NaN	UID147	1	56	6	S	2	XXXXXXXXXXPPPPPPPPPPPPPPXXXXXXX	22-Prot-0051_RD6_1_7934_-PPAse U	1983	___2	0.916833	0.00452265	112.68	94.152	112.68	-2.8347	166390	24	22967	24090
Q08945	Q08945	Q08945	FACT complex subunit SSRP1	SSRP1	GLKEGMNPSYDEYADSDEDQHDAYLERMKEE	GLKEGMNPSY(0.001)DEY(0.013)ADS(0.94)DEDQHDAY(0.047)LER	444	444	SSRP1_(444)		NaN	NaN	UID158	1	444	16	S	4	PPPPPPPPPPPPPPPPPPPPPPPPPPPXXXX	22-Prot-0051_RD6_1_7934_-PPAse U	2800	___2	0.939655	0.000772927	54.143	51.514	42.043	0.081505	54255	35	8155	8495
Q5SWX8-3;Q5SWX8-4;Q5SWX8	Q5SWX8-3	Q5SWX8-3	Protein odr-4 homolog	ODR4	NSDHRSTATVQICSGSVNLKGAVKCRAYIHS	VLT(0.987)QLLLNS(0.467)DHRS(0.219)T(0.219)AT(0.104)VQICS(0.006)GS(0.998)VNLKGAVK	278;246;278	278	ODR4_(278)		NaN	NaN	UID171	3	278	23	S	4	PPPPPPPPPPPPPPPPPPPPPPPPXXXXXXX	22-Prot-0051_RD6_1_7934_-PPAse U	3143	___2	0.998394	0.024849	43.727	26.212	43.727	6.9938	141290	48	27881	29249
Q9Y281;F8WDN3;G3V2U0	Q9Y281	Q9Y281	Cofilin-2	CFL2	_____________MASGVTVNDEVIKVFNDM	AS(0.942)GVT(0.058)VNDEVIKVFNDMK	3;3;3	3	CFL2_(3)		NaN	NaN	UID190	1	3	2	S	2	XXXXXXXXXXXXXXPPPPPPPPPPPPPPPPP	22-Prot-0051_RD6_1_7934_-PPAse U	4339	___2	0.941678	0.0114484	49.967	43.713	49.967	2.1187	42379	67	2459	2587
U3KQB5	U3KQB5	U3KQB5	Homeobox protein TGIF2	TGIF2	SGQTNLSVLQRVFYGSLPNIGIISSVQRSST	VFY(0.021)GS(0.989)LPNIGIIS(0.995)S(0.995)VQR	60	60	TGIF2_(60)		NaN	NaN	UID193	3	60	5	S	2	XXXXXXXXXXXPPPPPPPPPPPPPPPPPXXX	22-Prot-0051_RD6_1_7934_-PPAse U	4515	___2	0.989017	0.00634998	40.861	15.273	40.861	9.3157	337060	70	26919	28239
U3KQB5	U3KQB5	U3KQB5	Homeobox protein TGIF2	TGIF2	LQRVFYGSLPNIGIISSVQRSSTGRCQLAPL	VFY(0.021)GS(0.989)LPNIGIIS(0.995)S(0.995)VQR	68	68	TGIF2_(68)		NaN	NaN	UID194	3	68	13	S	2	XXXPPPPPPPPPPPPPPPPPXXXXXXXXXXX	22-Prot-0051_RD6_1_7934_-PPAse U	4515	___2	0.994819	0.00634998	40.861	15.273	40.861	9.3157	337060	71	26919	28239
U3KQB5	U3KQB5	U3KQB5	Homeobox protein TGIF2	TGIF2	QRVFYGSLPNIGIISSVQRSSTGRCQLAPLH	VFY(0.021)GS(0.989)LPNIGIIS(0.995)S(0.995)VQR	69	69	TGIF2_(69)		NaN	NaN	UID195	3	69	14	S	2	XXPPPPPPPPPPPPPPPPPXXXXXXXXXXXX	22-Prot-0051_RD6_1_7934_-PPAse U	4515	___2	0.994819	0.00634998	40.861	15.273	40.861	9.3157	337060	72	26919	28239
Q5SWX8-3;Q5SWX8-4;Q5SWX8	Q5SWX8-3	Q5SWX8-3	Protein odr-4 homolog	ODR4	GNTQATSHSFDVRVLTQLLLNSDHRSTATVQ	VLT(0.987)QLLLNS(0.467)DHRS(0.219)T(0.219)AT(0.104)VQICS(0.006)GS(0.998)VNLKGAVK	258;226;258	258	ODR4_(258)		NaN	NaN	UID227	3	258	3	T	4	XXXXXXXXXXXXXPPPPPPPPPPPPPPPPPP	22-Prot-0051_RD6_1_7934_-PPAse U	3143	___2	0.986801	0.024849	43.727	26.212	43.727	6.9938	141290	104	27881	29249
B0QYZ7;B1AKL4;Q9NRA8-2;Q9NRA8;Q9NRA8-3	B0QYZ7	B0QYZ7	Eukaryotic translation initiation factor 4E transporter	EIF4ENIF1	____QKAKVDLKPLLSSLSANKEKLKESSHS	VDLKPLLS(1)SLS(1)ANK	12;414;251;414;414	12	EIF4ENIF1_(12)		NaN	NaN	UID247	2	12	8	S	2	XXXXXXXXPPPPPPPPPPPPPPXXXXXXXXX	22-Prot-0051_RD6_1_7934_-PPAse U	566	___3	0.999683	0.000785724	57.888	17.355	57.888	9.9838	350370	2	26605	27906;27907
B0QYZ7;B1AKL4;Q9NRA8-2;Q9NRA8;Q9NRA8-3	B0QYZ7	B0QYZ7	Eukaryotic translation initiation factor 4E transporter	EIF4ENIF1	_QKAKVDLKPLLSSLSANKEKLKESSHSGVV	VDLKPLLS(1)SLS(1)ANK	15;417;254;417;417	15	EIF4ENIF1_(15)		NaN	NaN	UID248	2	15	11	S	2	XXXXXPPPPPPPPPPPPPPXXXXXXXXXXXX	22-Prot-0051_RD6_1_7934_-PPAse U	566	___3	0.999978	0.000785724	57.888	17.355	57.888	9.9838	350370	3	26605	27906;27907
C9J3F1;C9J6U8;C9JE69;B5ME25;E7ETE0;B3KW44;Q9H825	C9J3F1	C9J3F1	Methyltransferase-like protein 8	METTL8	________MNMIWRNSISCLRLGKVPHRYQS	NMIWRNS(0.995)IS(0.005)CLR	8;8;8;8;8;8;8	8	METTL8_(8)		NaN	NaN	UID249	1	8	7	S	2	XXXXXXXXXPPPPPPPPPPPPXXXXXXXXXX	22-Prot-0051_RD6_1_7934_-PPAse U	596	___3	0.995368	0.0347098	47.361	9.2614	47.361	1.2843	197620	4	19291	20245
F8WCV0	F8WCV0	F8WCV0	Dynein assembly factor with WDR repeat domains 1	DAW1	FGEPNHMQVSKILLNSRNYVGI_________	ILLNS(0.968)RNY(0.032)VGI	30	30	DAW1_(30)		NaN	NaN	UID255	1	30	5	S	2	XXXXXXXXXXXPPPPPPPPPPPXXXXXXXXX	22-Prot-0051_RD6_1_7934_-PPAse U	1145	___3	0.967858	0.0479418	62.969	37.715	62.969	0.83538	105180	10	10847	11292
O43399;O43399-5;O43399-7;O43399-2;O43399-4;O43399-3;A0A087WZ51;O43399-6	O43399	O43399	Tumor protein D54	TPD52L2	ISRKLGDMRNSATFKSFEDRVGTIKSKVVGD	NSAT(0.001)FKS(0.987)FEDRVGT(0.012)IK	166;180;189;146;160;169;112;123	166	TPD52L2_(166)		NaN	NaN	UID263	1	166	7	S	3	XXXXXXXXXPPPPPPPPPPPPPPPPXXXXXX	22-Prot-0051_RD6_1_7934_-PPAse U	1621	___3	0.9871	0.0383584	78.925	70.513	78.925	0.49188	122700	18	19488	20453
P08670;B0YJC4;A0A1B0GTT5;A0A1B0GVG8	P08670	P08670	Vimentin	VIM	GSALRPSTSRSLYASSPGGVYATRSSAVRLR	SLYAS(0.083)S(0.917)PGGVYATR	56;56;56;56	56	VIM_(56)		NaN	NaN	UID269	1	56	6	S	2	XXXXXXXXXXPPPPPPPPPPPPPPXXXXXXX	22-Prot-0051_RD6_1_7934_-PPAse U	1983	___3	0.916833	0.00452265	112.68	94.152	112.68	-2.8347	166390	24	22967	24090
Q08945	Q08945	Q08945	FACT complex subunit SSRP1	SSRP1	GLKEGMNPSYDEYADSDEDQHDAYLERMKEE	GLKEGMNPSY(0.001)DEY(0.013)ADS(0.94)DEDQHDAY(0.047)LER	444	444	SSRP1_(444)		NaN	NaN	UID280	1	444	16	S	4	PPPPPPPPPPPPPPPPPPPPPPPPPPPXXXX	22-Prot-0051_RD6_1_7934_-PPAse U	2800	___3	0.939655	0.000772927	54.143	51.514	42.043	0.081505	54255	35	8155	8495
Q9Y281;F8WDN3;G3V2U0	Q9Y281	Q9Y281	Cofilin-2	CFL2	_____________MASGVTVNDEVIKVFNDM	AS(0.942)GVT(0.058)VNDEVIKVFNDMK	3;3;3	3	CFL2_(3)		NaN	NaN	UID312	1	3	2	S	2	XXXXXXXXXXXXXXPPPPPPPPPPPPPPPPP	22-Prot-0051_RD6_1_7934_-PPAse U	4339	___3	0.941678	0.0114484	49.967	43.713	49.967	2.1187	42379	67	2459	2587
H7C4M0	H7C4M0	H7C4M0	Filamin A-interacting protein 1-like	FILIP1L	PARIPKPKSTGITKISTKAPTVPMDKPIYQN	PKSTGIT(0.025)KIS(0.992)T(0.982)K	131	131	FILIP1L_(131)		NaN	NaN	UID17	2	131	10	S	2	XXXXXXPPPPPPPPPPPPXXXXXXXXXXXXX	22-Prot-0051_RD6_1_7935_-PPAse U	1337	___1	0.992366	0.00207259	90.263	58.122	43.272	-7.3452	8521200	16	19904	20892
P05386;P05387;H0YDD8;P05386-2	P05386;P05387	P05387	60S acidic ribosomal protein P1;60S acidic ribosomal protein P2	RPLP1;RPLP2	AAPAEEKKVEAKKEESEESDDDMGFGLFD__;APAAAEEKKDEKKEESEESDDDMGFGLFD__	KEES(1)EES(1)DDDMGFGLFD	101;102;79;76	101;102	RPLP1;RPLP2_(101;102)		NaN	NaN	UID21	2	102	4	S	2	XXXXXXXXXXXXPPPPPPPPPPPPPPPPPXX	22-Prot-0051_RD6_1_7935_-PPAse U	1927;1928	___1	1	0.00010535	81.867	70.895	48.201	-0.35998	368650	20	12259	12788
P05386;P05387;H0YDD8;P05386-2	P05386;P05387	P05387	60S acidic ribosomal protein P1;60S acidic ribosomal protein P2	RPLP1;RPLP2	AAEEKKDEKKEESEESDDDMGFGLFD_____;AEEKKVEAKKEESEESDDDMGFGLFD_____	KEES(1)EES(1)DDDMGFGLFD	104;105;82;79	104;105	RPLP1;RPLP2_(104;105)		NaN	NaN	UID22	2	105	7	S	2	XXXXXXXXXPPPPPPPPPPPPPPPPPXXXXX	22-Prot-0051_RD6_1_7935_-PPAse U	1927;1928	___1	1	0.00010535	81.867	70.895	48.201	-0.35998	368650	21	12259	12788
Q96RW7-2;Q96RW7	Q96RW7-2	Q96RW7-2	Hemicentin-1	HMCN1	RIPFDPSLKEVTVSLSGPSPMIEIRNPLGKL	EVT(0.042)VS(0.174)LS(0.814)GPS(0.97)PMIEIR	252;252	252	HMCN1_(252)		NaN	NaN	UID57	2	252	7	S	2	XXXXXXXXXPPPPPPPPPPPPPPPPXXXXXX	22-Prot-0051_RD6_1_7935_-PPAse U	3722	___1	0.813965	0.0442407	52.662	13.369	52.662	-0.87244	561540	56	5515	5753
Q96RW7-2;Q96RW7	Q96RW7-2	Q96RW7-2	Hemicentin-1	HMCN1	FDPSLKEVTVSLSGPSPMIEIRNPLGKLIKK	EVT(0.042)VS(0.174)LS(0.814)GPS(0.97)PMIEIR	255;255	255	HMCN1_(255)		NaN	NaN	UID58	2	255	10	S	2	XXXXXXPPPPPPPPPPPPPPPPXXXXXXXXX	22-Prot-0051_RD6_1_7935_-PPAse U	3722	___1	0.97042	0.0442407	52.662	13.369	52.662	-0.87244	561540	57	5515	5753
P19957	P19957	P19957	Elafin	PI3	KAQEPVKGPVSTKPGSCPIILIRCAMLNPPN	PGS(1)CPIILIRCAMLNPPNRCLK	75	75	PI3_(75)		NaN	NaN	UID149	1	75	3	S	3	XXXXXXXXXXXXXPPPPPPPPPPPPPPPPPP	22-Prot-0051_RD6_1_7935_-PPAse U	2145	___2	1	0.0438335	46.768	34.111	46.768	-2.3864	576860	26	19897	20885
P23528;E9PP50;E9PK25;E9PS23	P23528	P23528	Cofilin-1	CFL1	_____________MASGVAVSDGVIKVFNDM	AS(1)GVAVSDGVIKVFNDMK	3;3;41;3	3	CFL1_(3)		NaN	NaN	UID152	1	3	2	S	2	XXXXXXXXXXXXXXPPPPPPPPPPPPPPPPP	22-Prot-0051_RD6_1_7935_-PPAse U	2193	___2	0.999999	2.83999e-57	166.29	122.52	158.27	2.775	1836000	29	2454;2455;2456	2577;2580;2582
Q09666	Q09666	Q09666	Neuroblast differentiation-associated protein AHNAK	AHNAK	SGSKGDLKSSKASLGSLEGEAEAEASSPKGK	AS(0.029)LGS(0.971)LEGEAEAEASSPK	5752	5752	AHNAK_(5752)		NaN	NaN	UID159	1	5752	5	S	2	XXXXXXXXXXXPPPPPPPPPPPPPPPPPPXX	22-Prot-0051_RD6_1_7935_-PPAse U	2805	___2	0.971225	0.0121221	76.494	48.231	76.494	-0.057579	17386	36	2484	2615
Q9UQ80;F8VR77	Q9UQ80	Q9UQ80	Proliferation-associated protein 2G4	PA2G4	______________MSGEDEQQEQTIAEDLV	S(1)GEDEQQEQTIAEDLVVTK	2;2	2	PA2G4_(2)		NaN	NaN	UID188	1	2	1	S	2	XXXXXXXXXXXXXXXPPPPPPPPPPPPPPPP	22-Prot-0051_RD6_1_7935_-PPAse U	4325	___2	0.999757	4.61282e-05	51.333	43.685	51.333	-1.945	42918	65	22060;22061	23140;23142
A0A3B3IT29;A0A3B3ISF8;A0A3B3ISF0	A0A3B3IT29	A0A3B3IT29	La-related protein 1B	LARP1B	EKRQPPLLPPKGNPWTKKPPQHLSPDTTGPP	RQPPLLPPKGNPWT(1)K	151;151;151	151	LARP1B_(151)		NaN	NaN	UID203	1	151	14	T	2	XXPPPPPPPPPPPPPPPXXXXXXXXXXXXXX	22-Prot-0051_RD6_1_7935_-PPAse U	441	___2	1	0.00536141	48.785	24.981	41.824	3.6416	448260	80	21373	22422
P62995-3;P62995;H7BXF3;H7C2L4	P62995-3	P62995-3	Transformer-2 protein homolog beta	TRA2B	GRRIRVDFSITKRPHTPTPGIYMGRPTYGSS	RPHT(0.977)PT(0.023)PGIYMGRPTYGSSR	101;201;60;21	101	TRA2B_(101)		NaN	NaN	UID222	1	101	4	T	4	XXXXXXXXXXXXPPPPPPPPPPPPPPPPPPP	22-Prot-0051_RD6_1_7935_-PPAse U	2671	___2	0.977221	0.00594573	49.718	44.902	49.718	1.6643	43252	99	21332	22377
Q9Y253	Q9Y253	Q9Y253	DNA polymerase eta	POLH	VSHQGKRNPKSPLACTNKRPRPEGMQTLESF	NPKS(0.003)PLACT(0.997)NK	692	692	POLH_(692)		NaN	NaN	UID235	1	692	9	T	2	XXXXXXXPPPPPPPPPPPXXXXXXXXXXXXX	22-Prot-0051_RD6_1_7935_-PPAse U	4334	___2	0.997021	0.0102217	62.969	25.246	62.969	3.502	779940	112	19381	20339
H7C4M0	H7C4M0	H7C4M0	Filamin A-interacting protein 1-like	FILIP1L	PARIPKPKSTGITKISTKAPTVPMDKPIYQN	PKSTGIT(0.025)KIS(0.992)T(0.982)K	131	131	FILIP1L_(131)		NaN	NaN	UID261	2	131	10	S	2	XXXXXXPPPPPPPPPPPPXXXXXXXXXXXXX	22-Prot-0051_RD6_1_7935_-PPAse U	1337	___3	0.992366	0.00207259	90.263	58.122	43.272	-7.3452	8521200	16	19904	20892
P05386;P05387;H0YDD8;P05386-2	P05386;P05387	P05387	60S acidic ribosomal protein P1;60S acidic ribosomal protein P2	RPLP1;RPLP2	AAPAEEKKVEAKKEESEESDDDMGFGLFD__;APAAAEEKKDEKKEESEESDDDMGFGLFD__	KEES(1)EES(1)DDDMGFGLFD	101;102;79;76	101;102	RPLP1;RPLP2_(101;102)		NaN	NaN	UID265	2	102	4	S	2	XXXXXXXXXXXXPPPPPPPPPPPPPPPPPXX	22-Prot-0051_RD6_1_7935_-PPAse U	1927;1928	___3	1	0.00010535	81.867	70.895	48.201	-0.35998	368650	20	12259	12788
P05386;P05387;H0YDD8;P05386-2	P05386;P05387	P05387	60S acidic ribosomal protein P1;60S acidic ribosomal protein P2	RPLP1;RPLP2	AAEEKKDEKKEESEESDDDMGFGLFD_____;AEEKKVEAKKEESEESDDDMGFGLFD_____	KEES(1)EES(1)DDDMGFGLFD	104;105;82;79	104;105	RPLP1;RPLP2_(104;105)		NaN	NaN	UID266	2	105	7	S	2	XXXXXXXXXPPPPPPPPPPPPPPPPPXXXXX	22-Prot-0051_RD6_1_7935_-PPAse U	1927;1928	___3	1	0.00010535	81.867	70.895	48.201	-0.35998	368650	21	12259	12788
P19957	P19957	P19957	Elafin	PI3	KAQEPVKGPVSTKPGSCPIILIRCAMLNPPN	PGS(1)CPIILIRCAMLNPPNRCLK	75	75	PI3_(75)		NaN	NaN	UID271	1	75	3	S	3	XXXXXXXXXXXXXPPPPPPPPPPPPPPPPPP	22-Prot-0051_RD6_1_7935_-PPAse U	2145	___3	1	0.0438335	46.768	34.111	46.768	-2.3864	576860	26	19897	20885
P23528;E9PP50;E9PK25;E9PS23	P23528	P23528	Cofilin-1	CFL1	_____________MASGVAVSDGVIKVFNDM	AS(1)GVAVSDGVIKVFNDMK	3;3;41;3	3	CFL1_(3)		NaN	NaN	UID274	1	3	2	S	2	XXXXXXXXXXXXXXPPPPPPPPPPPPPPPPP	22-Prot-0051_RD6_1_7935_-PPAse U	2193	___3	0.999999	2.83999e-57	166.29	122.52	158.27	2.775	1836000	29	2454;2455;2456	2577;2580;2582
Q09666	Q09666	Q09666	Neuroblast differentiation-associated protein AHNAK	AHNAK	SGSKGDLKSSKASLGSLEGEAEAEASSPKGK	AS(0.029)LGS(0.971)LEGEAEAEASSPK	5752	5752	AHNAK_(5752)		NaN	NaN	UID281	1	5752	5	S	2	XXXXXXXXXXXPPPPPPPPPPPPPPPPPPXX	22-Prot-0051_RD6_1_7935_-PPAse U	2805	___3	0.971225	0.0121221	76.494	48.231	76.494	-0.057579	17386	36	2484	2615
Q96RW7-2;Q96RW7	Q96RW7-2	Q96RW7-2	Hemicentin-1	HMCN1	RIPFDPSLKEVTVSLSGPSPMIEIRNPLGKL	EVT(0.042)VS(0.174)LS(0.814)GPS(0.97)PMIEIR	252;252	252	HMCN1_(252)		NaN	NaN	UID301	2	252	7	S	2	XXXXXXXXXPPPPPPPPPPPPPPPPXXXXXX	22-Prot-0051_RD6_1_7935_-PPAse U	3722	___3	0.813965	0.0442407	52.662	13.369	52.662	-0.87244	561540	56	5515	5753
Q96RW7-2;Q96RW7	Q96RW7-2	Q96RW7-2	Hemicentin-1	HMCN1	FDPSLKEVTVSLSGPSPMIEIRNPLGKLIKK	EVT(0.042)VS(0.174)LS(0.814)GPS(0.97)PMIEIR	255;255	255	HMCN1_(255)		NaN	NaN	UID302	2	255	10	S	2	XXXXXXPPPPPPPPPPPPPPPPXXXXXXXXX	22-Prot-0051_RD6_1_7935_-PPAse U	3722	___3	0.97042	0.0442407	52.662	13.369	52.662	-0.87244	561540	57	5515	5753
Q9UQ80;F8VR77	Q9UQ80	Q9UQ80	Proliferation-associated protein 2G4	PA2G4	______________MSGEDEQQEQTIAEDLV	S(1)GEDEQQEQTIAEDLVVTK	2;2	2	PA2G4_(2)		NaN	NaN	UID310	1	2	1	S	2	XXXXXXXXXXXXXXXPPPPPPPPPPPPPPPP	22-Prot-0051_RD6_1_7935_-PPAse U	4325	___3	0.999757	4.61282e-05	51.333	43.685	51.333	-1.945	42918	65	22060;22061	23140;23142
A0A3B3IT29;A0A3B3ISF8;A0A3B3ISF0	A0A3B3IT29	A0A3B3IT29	La-related protein 1B	LARP1B	EKRQPPLLPPKGNPWTKKPPQHLSPDTTGPP	RQPPLLPPKGNPWT(1)K	151;151;151	151	LARP1B_(151)		NaN	NaN	UID325	1	151	14	T	2	XXPPPPPPPPPPPPPPPXXXXXXXXXXXXXX	22-Prot-0051_RD6_1_7935_-PPAse U	441	___3	1	0.00536141	48.785	24.981	41.824	3.6416	448260	80	21373	22422
P62995-3;P62995;H7BXF3;H7C2L4	P62995-3	P62995-3	Transformer-2 protein homolog beta	TRA2B	GRRIRVDFSITKRPHTPTPGIYMGRPTYGSS	RPHT(0.977)PT(0.023)PGIYMGRPTYGSSR	101;201;60;21	101	TRA2B_(101)		NaN	NaN	UID344	1	101	4	T	4	XXXXXXXXXXXXPPPPPPPPPPPPPPPPPPP	22-Prot-0051_RD6_1_7935_-PPAse U	2671	___3	0.977221	0.00594573	49.718	44.902	49.718	1.6643	43252	99	21332	22377
Q9Y253	Q9Y253	Q9Y253	DNA polymerase eta	POLH	VSHQGKRNPKSPLACTNKRPRPEGMQTLESF	NPKS(0.003)PLACT(0.997)NK	692	692	POLH_(692)		NaN	NaN	UID357	1	692	9	T	2	XXXXXXXPPPPPPPPPPPXXXXXXXXXXXXX	22-Prot-0051_RD6_1_7935_-PPAse U	4334	___3	0.997021	0.0102217	62.969	25.246	62.969	3.502	779940	112	19381	20339
H0YMB0;Q00978	H0YMB0	H0YMB0	Interferon regulatory factor 9	IRF9	LFPKPGPLEPTQRLLSQLERGILVASNPRGL	LLS(1)QLERGILVAS(1)NPR	171;273	171	IRF9_(171)		NaN	NaN	UID15	2	171	3	S	3	XXXXXXXXXXXXXPPPPPPPPPPPPPPPPXX	22-Prot-0050_RD5_1_7930_+PPAse U	1262	___1	1	0.00997495	55.754	6.6576	55.754	-6.5313	2081300	14	15294	15964
H0YMB0;Q00978	H0YMB0	H0YMB0	Interferon regulatory factor 9	IRF9	TQRLLSQLERGILVASNPRGLFVQRLCPIPI	LLS(1)QLERGILVAS(1)NPR	181;283	181	IRF9_(181)		NaN	NaN	UID16	2	181	13	S	3	XXXPPPPPPPPPPPPPPPPXXXXXXXXXXXX	22-Prot-0050_RD5_1_7930_+PPAse U	1262	___1	1	0.00997495	55.754	6.6576	55.754	-6.5313	2081300	15	15294	15964
P31260-2;P31260	P31260-2	P31260-2	Homeobox protein Hox-A10	HOXA10	FNMYLTRERRLEISRSVHLTDRQVKIWFQNR	LEIS(0.007)RS(0.995)VHLT(0.998)DRQVK	56;372	56	HOXA10_(56)		NaN	NaN	UID33	2	56	6	S	2	XXXXXXXXXXPPPPPPPPPPPPPPPXXXXXX	22-Prot-0050_RD5_1_7930_+PPAse U	2278	___1	0.995006	0.0141846	45.939	12.839	45.939	-7.9982	197530	32	13603	14212
A0A3B3IRX8;E7EV01;O15484	A0A3B3IRX8	A0A3B3IRX8	Calpain-5	CAPN5	LRTDQPEGRYVIIPTTFEPGHTGEFLLRVFT	YVIIPT(0.367)T(0.817)FEPGHT(0.817)GEFLLRVFTDVPSNCR	346;514;474	346	CAPN5_(346)		NaN	NaN	UID79	2	346	7	T	4	XXXXXXXXXPPPPPPPPPPPPPPPPPPPPPP	22-Prot-0050_RD5_1_7930_+PPAse U	439	___1	0.816643	1.41759e-05	80.026	62.511	80.026	1.4261	3556900	78	30339	31797
M0QX27;M0R2E9;M0R0H5;M0QYR6;M0R1I2;Q03405-2;Q03405-3;Q03405	M0QX27	M0QX27	Urokinase plasminogen activator surface receptor	PLAUR	SCTHSEKTNRTLSYRTGLKITSLT_______	TNRT(0.002)LS(0.476)Y(0.723)RT(0.799)GLK	70;76;56;56;81;81;81;81	70	PLAUR_(70)		NaN	NaN	UID92	2	70	9	T	2	XXXXXXXPPPPPPPPPPPPXXXXXXXXXXXX	22-Prot-0050_RD5_1_7930_+PPAse U	1449	___1	0.799198	0.020822	44.57	34.32	44.57	-6.8953	24917	91	25515	26776
P31260-2;P31260	P31260-2	P31260-2	Homeobox protein Hox-A10	HOXA10	LTRERRLEISRSVHLTDRQVKIWFQNRRMKL	LEIS(0.007)RS(0.995)VHLT(0.998)DRQVK	60;376	60	HOXA10_(60)		NaN	NaN	UID94	2	60	10	T	2	XXXXXXPPPPPPPPPPPPPPPXXXXXXXXXX	22-Prot-0050_RD5_1_7930_+PPAse U	2278	___1	0.997717	0.0141846	45.939	12.839	45.939	-7.9982	197530	93	13603	14212
Q8N488	Q8N488	Q8N488	RING1 and YY1-binding protein	RYBP	INSQLVAQQVAQQYATPPPPKKEKKEKVEKQ	INS(0.001)QLVAQQVAQQY(1)AT(1)PPPPK	72	72	RYBP_(72)		NaN	NaN	UID109	2	72	16	T	3	PPPPPPPPPPPPPPPPPPPPPXXXXXXXXXX	22-Prot-0050_RD5_1_7930_+PPAse U	3403	___1	0.999699	0.0063172	50.641	16.169	40.83	-5.3668	6005700	108	11180	11653;11654
E7EPN9;Q9Y520-3;Q9Y520-6;Q9Y520-4;Q9Y520-5;Q9Y520;Q9Y520-7;A0A2R8Y7F4;A0A2R8YET2;H7C5N8;Q9Y520-2	E7EPN9	E7EPN9	Protein PRRC2C	PRRC2C	QPRAGPIKAQKLPDLSPVENKEHKPGPIGKE	AQKLPDLS(1)PVENKEHK	2107;2105;2105;2105;2058;2105;2107;159;299;653;1862	2107	PRRC2C_(2107)		NaN	NaN	UID130	1	2107	8	S	2	XXXXXXXXPPPPPPPPPPPPPPPPXXXXXXX	22-Prot-0050_RD5_1_7930_+PPAse U	917	___2	1	0.0433388	43.306	11.255	43.306	6.4413	102770	7	2285	2404
Q008S8	Q008S8	Q008S8	Epithelial cell-transforming sequence 2 oncogene-like	ECT2L	TPFERTSKTTYQFIASVALHRLLIENIPDSK	T(0.05)T(0.05)Y(0.041)QFIAS(0.86)VALHRLLIENIPDSK	847	847	ECT2L_(847)		NaN	NaN	UID157	1	847	8	S	3	XXXXXXXXPPPPPPPPPPPPPPPPPPPPPPP	22-Prot-0050_RD5_1_7930_+PPAse U	2742	___2	0.859721	0.0335574	44.16	22.785	44.16	-5.0579	262980	34	25996	27270
Q8N3X6-3	Q8N3X6-3	Q8N3X6-3	Ligand-dependent nuclear receptor corepressor-like protein	LCORL	VAGMLQVKTDEKLNVSDENTASCPLSPIKMC	LNVS(0.999)DENTASCPLSPIK	272	272	LCORL_(272)		NaN	NaN	UID176	1	272	4	S	2	XXXXXXXXXXXXPPPPPPPPPPPPPPPPPXX	22-Prot-0050_RD5_1_7930_+PPAse U	3400	___2	0.999462	0.0468761	42.061	13.733	42.061	7.4304	1398900	53	15652	16337
Q96G42	Q96G42	Q96G42	Kelch domain-containing protein 7B	KLHDC7B	___________MVLRSHPFPRQDRPQGSVPR	VLRS(1)HPFPRQDR	5	5	KLHDC7B_(5)		NaN	NaN	UID178	1	5	4	S	2	XXXXXXXXXXXXPPPPPPPPPPPPXXXXXXX	22-Prot-0050_RD5_1_7930_+PPAse U	3649	___2	1	0.0151836	53.517	24.2	53.517	4.361	227210	55	27807	29173
P31150	P31150	P31150	Rab GDP dissociation inhibitor alpha	GDI1	ALYRTDDYLDQPCLETVNRIKLYSESLARYG	TDDYLDQPCLET(1)VNR	205	205	GDI1_(205)		NaN	NaN	UID215	1	205	12	T	2	XXXXPPPPPPPPPPPPPPPXXXXXXXXXXXX	22-Prot-0050_RD5_1_7930_+PPAse U	2275	___2	0.999993	0.00295317	58.476	37.115	58.476	1.2441	220820	92	5746;24308	5994;25504
P62937;P62937-2	P62937	P62937	Peptidyl-prolyl cis-trans isomerase A;Peptidyl-prolyl cis-trans isomerase A, N-terminally processed	PPIA	HTGPGILSMANAGPNTNGSQFFICTAKTEWL	HT(0.005)GPGILS(0.048)MANAGPNT(0.899)NGS(0.021)QFFICT(0.016)AKT(0.011)EWLDGK	107;47	107	PPIA_(107)		NaN	NaN	UID221	1	107	16	T	4	PPPPPPPPPPPPPPPPPPPPPPPPPPPPPPP	22-Prot-0050_RD5_1_7930_+PPAse U	2668	___2	0.899395	0.00148311	52.794	40.137	52.794	-6.7154	487940	98	9558	9956
Q13123;E7EQZ7;D6REL4;D6RAY9;D6RCQ4	Q13123	Q13123	Protein Red	IK	HQSKLTNEDFRKLLMTPRAAPTSAPPSKSRH	LLMT(0.758)PRAAPT(0.239)S(0.003)APPSK	42;42;42;42;38	42	IK_(42)		NaN	NaN	UID224	1	42	4	T	2	XXXXXXXXXXXXPPPPPPPPPPPPPPPPXXX	22-Prot-0050_RD5_1_7930_+PPAse U	2840	___2	0.758142	0.00139592	119.94	55.67	57.003	-6.7955	2624400	101	15140	15800;15801;15802
Q9HCC0-2;Q9HCC0;D6RD67	Q9HCC0-2	Q9HCC0-2	Methylcrotonoyl-CoA carboxylase beta chain, mitochondrial	MCCC2	LCCQRNIPLLFLQNITGFMVGREYEAEGIAK	NIPLLFLQNIT(1)GFMVGREYEAEGIAK	367;405;177	367	MCCC2_(367)		NaN	NaN	UID234	1	367	11	T	3	XXXXXPPPPPPPPPPPPPPPPPPPPPPPPPP	22-Prot-0050_RD5_1_7930_+PPAse U	4017	___2	0.999696	0.01535	44.667	25.091	44.667	8.5695	948510	111	18894	19836
A0A1B0GUA8;Q9H1H9-3;Q9H1H9-4;Q9H1H9-2;Q9H1H9;E7ERX9;Q9NQT8	A0A1B0GUA8;E7ERX9	E7ERX9	Kinesin-like protein KIF13A;Kinesin-like protein;Kinesin-like protein KIF13B	KIF13A;KIF13B	NEEQSFKVEVSYMEIYNEKVRDLLDPKGSRQ;NESQTFKVEVSYMEIYNEKVRDLLDPKGSRQ	VEVSYMEIY(1)NEKVR	153;153;153;153;153;154;154	153;154	KIF13A;KIF13B_(153;154)		NaN	NaN	UID237	1	154	9	Y	3	XXXXXXXPPPPPPPPPPPPPPXXXXXXXXXX	22-Prot-0050_RD5_1_7930_+PPAse U	338;927	___2	0.999882	0.00541924	44.57	9.2404	44.57	-8.4555	164900	114	26740	28051
E7EPN9;Q9Y520-3;Q9Y520-6;Q9Y520-4;Q9Y520-5;Q9Y520;Q9Y520-7;A0A2R8Y7F4;A0A2R8YET2;H7C5N8;Q9Y520-2	E7EPN9	E7EPN9	Protein PRRC2C	PRRC2C	QPRAGPIKAQKLPDLSPVENKEHKPGPIGKE	AQKLPDLS(1)PVENKEHK	2107;2105;2105;2105;2058;2105;2107;159;299;653;1862	2107	PRRC2C_(2107)		NaN	NaN	UID252	1	2107	8	S	2	XXXXXXXXPPPPPPPPPPPPPPPPXXXXXXX	22-Prot-0050_RD5_1_7930_+PPAse U	917	___3	1	0.0433388	43.306	11.255	43.306	6.4413	102770	7	2285	2404
H0YMB0;Q00978	H0YMB0	H0YMB0	Interferon regulatory factor 9	IRF9	LFPKPGPLEPTQRLLSQLERGILVASNPRGL	LLS(1)QLERGILVAS(1)NPR	171;273	171	IRF9_(171)		NaN	NaN	UID259	2	171	3	S	3	XXXXXXXXXXXXXPPPPPPPPPPPPPPPPXX	22-Prot-0050_RD5_1_7930_+PPAse U	1262	___3	1	0.00997495	55.754	6.6576	55.754	-6.5313	2081300	14	15294	15964
H0YMB0;Q00978	H0YMB0	H0YMB0	Interferon regulatory factor 9	IRF9	TQRLLSQLERGILVASNPRGLFVQRLCPIPI	LLS(1)QLERGILVAS(1)NPR	181;283	181	IRF9_(181)		NaN	NaN	UID260	2	181	13	S	3	XXXPPPPPPPPPPPPPPPPXXXXXXXXXXXX	22-Prot-0050_RD5_1_7930_+PPAse U	1262	___3	1	0.00997495	55.754	6.6576	55.754	-6.5313	2081300	15	15294	15964
P31260-2;P31260	P31260-2	P31260-2	Homeobox protein Hox-A10	HOXA10	FNMYLTRERRLEISRSVHLTDRQVKIWFQNR	LEIS(0.007)RS(0.995)VHLT(0.998)DRQVK	56;372	56	HOXA10_(56)		NaN	NaN	UID277	2	56	6	S	2	XXXXXXXXXXPPPPPPPPPPPPPPPXXXXXX	22-Prot-0050_RD5_1_7930_+PPAse U	2278	___3	0.995006	0.0141846	45.939	12.839	45.939	-7.9982	197530	32	13603	14212
Q008S8	Q008S8	Q008S8	Epithelial cell-transforming sequence 2 oncogene-like	ECT2L	TPFERTSKTTYQFIASVALHRLLIENIPDSK	T(0.05)T(0.05)Y(0.041)QFIAS(0.86)VALHRLLIENIPDSK	847	847	ECT2L_(847)		NaN	NaN	UID279	1	847	8	S	3	XXXXXXXXPPPPPPPPPPPPPPPPPPPPPPP	22-Prot-0050_RD5_1_7930_+PPAse U	2742	___3	0.859721	0.0335574	44.16	22.785	44.16	-5.0579	262980	34	25996	27270
Q8N3X6-3	Q8N3X6-3	Q8N3X6-3	Ligand-dependent nuclear receptor corepressor-like protein	LCORL	VAGMLQVKTDEKLNVSDENTASCPLSPIKMC	LNVS(0.999)DENTASCPLSPIK	272	272	LCORL_(272)		NaN	NaN	UID298	1	272	4	S	2	XXXXXXXXXXXXPPPPPPPPPPPPPPPPPXX	22-Prot-0050_RD5_1_7930_+PPAse U	3400	___3	0.999462	0.0468761	42.061	13.733	42.061	7.4304	1398900	53	15652	16337
Q96G42	Q96G42	Q96G42	Kelch domain-containing protein 7B	KLHDC7B	___________MVLRSHPFPRQDRPQGSVPR	VLRS(1)HPFPRQDR	5	5	KLHDC7B_(5)		NaN	NaN	UID300	1	5	4	S	2	XXXXXXXXXXXXPPPPPPPPPPPPXXXXXXX	22-Prot-0050_RD5_1_7930_+PPAse U	3649	___3	1	0.0151836	53.517	24.2	53.517	4.361	227210	55	27807	29173
A0A3B3IRX8;E7EV01;O15484	A0A3B3IRX8	A0A3B3IRX8	Calpain-5	CAPN5	LRTDQPEGRYVIIPTTFEPGHTGEFLLRVFT	YVIIPT(0.367)T(0.817)FEPGHT(0.817)GEFLLRVFTDVPSNCR	346;514;474	346	CAPN5_(346)		NaN	NaN	UID323	2	346	7	T	4	XXXXXXXXXPPPPPPPPPPPPPPPPPPPPPP	22-Prot-0050_RD5_1_7930_+PPAse U	439	___3	0.816643	1.41759e-05	80.026	62.511	80.026	1.4261	3556900	78	30339	31797
M0QX27;M0R2E9;M0R0H5;M0QYR6;M0R1I2;Q03405-2;Q03405-3;Q03405	M0QX27	M0QX27	Urokinase plasminogen activator surface receptor	PLAUR	SCTHSEKTNRTLSYRTGLKITSLT_______	TNRT(0.002)LS(0.476)Y(0.723)RT(0.799)GLK	70;76;56;56;81;81;81;81	70	PLAUR_(70)		NaN	NaN	UID336	2	70	9	T	2	XXXXXXXPPPPPPPPPPPPXXXXXXXXXXXX	22-Prot-0050_RD5_1_7930_+PPAse U	1449	___3	0.799198	0.020822	44.57	34.32	44.57	-6.8953	24917	91	25515	26776
P31150	P31150	P31150	Rab GDP dissociation inhibitor alpha	GDI1	ALYRTDDYLDQPCLETVNRIKLYSESLARYG	TDDYLDQPCLET(1)VNR	205	205	GDI1_(205)		NaN	NaN	UID337	1	205	12	T	2	XXXXPPPPPPPPPPPPPPPXXXXXXXXXXXX	22-Prot-0050_RD5_1_7930_+PPAse U	2275	___3	0.999993	0.00295317	58.476	37.115	58.476	1.2441	220820	92	5746;24308	5994;25504
P31260-2;P31260	P31260-2	P31260-2	Homeobox protein Hox-A10	HOXA10	LTRERRLEISRSVHLTDRQVKIWFQNRRMKL	LEIS(0.007)RS(0.995)VHLT(0.998)DRQVK	60;376	60	HOXA10_(60)		NaN	NaN	UID338	2	60	10	T	2	XXXXXXPPPPPPPPPPPPPPPXXXXXXXXXX	22-Prot-0050_RD5_1_7930_+PPAse U	2278	___3	0.997717	0.0141846	45.939	12.839	45.939	-7.9982	197530	93	13603	14212
P62937;P62937-2	P62937	P62937	Peptidyl-prolyl cis-trans isomerase A;Peptidyl-prolyl cis-trans isomerase A, N-terminally processed	PPIA	HTGPGILSMANAGPNTNGSQFFICTAKTEWL	HT(0.005)GPGILS(0.048)MANAGPNT(0.899)NGS(0.021)QFFICT(0.016)AKT(0.011)EWLDGK	107;47	107	PPIA_(107)		NaN	NaN	UID343	1	107	16	T	4	PPPPPPPPPPPPPPPPPPPPPPPPPPPPPPP	22-Prot-0050_RD5_1_7930_+PPAse U	2668	___3	0.899395	0.00148311	52.794	40.137	52.794	-6.7154	487940	98	9558	9956
Q13123;E7EQZ7;D6REL4;D6RAY9;D6RCQ4	Q13123	Q13123	Protein Red	IK	HQSKLTNEDFRKLLMTPRAAPTSAPPSKSRH	LLMT(0.758)PRAAPT(0.239)S(0.003)APPSK	42;42;42;42;38	42	IK_(42)		NaN	NaN	UID346	1	42	4	T	2	XXXXXXXXXXXXPPPPPPPPPPPPPPPPXXX	22-Prot-0050_RD5_1_7930_+PPAse U	2840	___3	0.758142	0.00139592	119.94	55.67	57.003	-6.7955	2624400	101	15140	15800;15801;15802
Q8N488	Q8N488	Q8N488	RING1 and YY1-binding protein	RYBP	INSQLVAQQVAQQYATPPPPKKEKKEKVEKQ	INS(0.001)QLVAQQVAQQY(1)AT(1)PPPPK	72	72	RYBP_(72)		NaN	NaN	UID353	2	72	16	T	3	PPPPPPPPPPPPPPPPPPPPPXXXXXXXXXX	22-Prot-0050_RD5_1_7930_+PPAse U	3403	___3	0.999699	0.0063172	50.641	16.169	40.83	-5.3668	6005700	108	11180	11653;11654
Q9HCC0-2;Q9HCC0;D6RD67	Q9HCC0-2	Q9HCC0-2	Methylcrotonoyl-CoA carboxylase beta chain, mitochondrial	MCCC2	LCCQRNIPLLFLQNITGFMVGREYEAEGIAK	NIPLLFLQNIT(1)GFMVGREYEAEGIAK	367;405;177	367	MCCC2_(367)		NaN	NaN	UID356	1	367	11	T	3	XXXXXPPPPPPPPPPPPPPPPPPPPPPPPPP	22-Prot-0050_RD5_1_7930_+PPAse U	4017	___3	0.999696	0.01535	44.667	25.091	44.667	8.5695	948510	111	18894	19836
A0A1B0GUA8;Q9H1H9-3;Q9H1H9-4;Q9H1H9-2;Q9H1H9;E7ERX9;Q9NQT8	A0A1B0GUA8;E7ERX9	E7ERX9	Kinesin-like protein KIF13A;Kinesin-like protein;Kinesin-like protein KIF13B	KIF13A;KIF13B	NEEQSFKVEVSYMEIYNEKVRDLLDPKGSRQ;NESQTFKVEVSYMEIYNEKVRDLLDPKGSRQ	VEVSYMEIY(1)NEKVR	153;153;153;153;153;154;154	153;154	KIF13A;KIF13B_(153;154)		NaN	NaN	UID359	1	154	9	Y	3	XXXXXXXPPPPPPPPPPPPPPXXXXXXXXXX	22-Prot-0050_RD5_1_7930_+PPAse U	338;927	___3	0.999882	0.00541924	44.57	9.2404	44.57	-8.4555	164900	114	26740	28051
P22680	P22680	P22680	Cholesterol 7-alpha-monooxygenase	CYP7A1	LFAIHEIKQFLILMLSYFELELIEGQAKCPP	QFLILMLS(1)Y(1)FELELIEGQAKCPPLDQSR	463	463	CYP7A1_(463)		NaN	NaN	UID29	2	463	8	S	3	XXXXXXXXPPPPPPPPPPPPPPPPPPPPPPP	22-Prot-0050_RD5_1_7931_+PPAse U	2183	___1	0.999999	0.000273403	73.532	49.656	73.532	8.6288	1246500	28	20132	21128
Q70EL1-9;Q70EL1-10;Q70EL1-8;Q70EL1-7;Q70EL1	Q70EL1-9	Q70EL1-9	Inactive ubiquitin carboxyl-terminal hydrolase 54	USP54	AQEQLFQEKKDPANPSPVMPGIATSERGDEH	DPANPS(1)PVMPGIAT(0.5)S(0.5)ER	124;124;124;886;1036	124	USP54_(124)		NaN	NaN	UID51	2	124	6	S	2	XXXXXXXXXXPPPPPPPPPPPPPPPPPXXXX	22-Prot-0050_RD5_1_7931_+PPAse U	3261	___1	0.999963	0.00138668	42.061	25.069	42.061	-3.7663	2815200	50	3951	4135;4136
A0A3B3IRX8;E7EV01;O15484	A0A3B3IRX8	A0A3B3IRX8	Calpain-5	CAPN5	EGRYVIIPTTFEPGHTGEFLLRVFTDVPSNC	Y(0.001)VIIPT(0.323)T(0.739)FEPGHT(0.917)GEFLLRVFT(0.012)DVPS(0.007)NCR	352;520;480	352	CAPN5_(352)		NaN	NaN	UID80	2	352	13	T	4	XXXPPPPPPPPPPPPPPPPPPPPPPPPPPPP	22-Prot-0050_RD5_1_7931_+PPAse U	439	___1	0.917139	1.41759e-05	80.026	62.511	42.888	0.27565	3556900	79	30339	31797
H7C4M0	H7C4M0	H7C4M0	Filamin A-interacting protein 1-like	FILIP1L	ARIPKPKSTGITKISTKAPTVPMDKPIYQNG	PKSTGIT(0.02)KIS(0.985)T(0.994)K	132	132	FILIP1L_(132)		NaN	NaN	UID90	2	132	11	T	2	XXXXXPPPPPPPPPPPPXXXXXXXXXXXXXX	22-Prot-0050_RD5_1_7931_+PPAse U	1337	___1	0.99434	0.00207259	90.263	58.122	90.263	-7.1015	8521200	89	19904	20892
P22680	P22680	P22680	Cholesterol 7-alpha-monooxygenase	CYP7A1	FAIHEIKQFLILMLSYFELELIEGQAKCPPL	QFLILMLS(1)Y(1)FELELIEGQAKCPPLDQSR	464	464	CYP7A1_(464)		NaN	NaN	UID118	2	464	9	Y	3	XXXXXXXPPPPPPPPPPPPPPPPPPPPPPPP	22-Prot-0050_RD5_1_7931_+PPAse U	2183	___1	0.999999	0.000273403	73.532	49.656	73.532	8.6288	1246500	117	20132	21128
Q8N488	Q8N488	Q8N488	RING1 and YY1-binding protein	RYBP	PRINSQLVAQQVAQQYATPPPPKKEKKEKVE	INS(0.001)QLVAQQVAQQY(1)AT(1)PPPPK	70	70	RYBP_(70)		NaN	NaN	UID121	2	70	14	Y	3	XXPPPPPPPPPPPPPPPPPPPPPXXXXXXXX	22-Prot-0050_RD5_1_7931_+PPAse U	3403	___1	0.999773	0.0063172	50.641	16.169	46.768	-5.9197	6005700	120	11180	11653;11654
A0A087WTE6	A0A087WTE6	A0A087WTE6	SRC kinase-signaling inhibitor 1	SRCIN1	IPTLLSPQDLGPPGGSAPGPTRKAAPGPRAF	QLIPT(0.053)LLS(0.155)PQDLGPPGGS(0.777)APGPT(0.015)RKAAPGPR	83	83	SRCIN1_(83)		NaN	NaN	UID123	1	83	18	S	3	PPPPPPPPPPPPPPPPPPPPPPPPPPPPPXX	22-Prot-0050_RD5_1_7931_+PPAse U	29	___2	0.777316	0.0101066	54.418	29.185	54.418	-4.2319	400350	0	20456	21470
S4R364	S4R364	S4R364	Motor neuron and pancreas homeobox protein 1	MNX1	PSKVGPREPLFSPPQSRWASGSFLSIRAGHL	VGPREPLFS(0.001)PPQS(0.999)R	38	38	MNX1_(38)		NaN	NaN	UID192	1	38	13	S	2	XXXPPPPPPPPPPPPPPXXXXXXXXXXXXXX	22-Prot-0050_RD5_1_7931_+PPAse U	4512	___2	0.998757	0.00876935	44.598	14.249	44.598	0.56203	1761500	69	27054	28382
A0A0A0MSN1;A0A494C182;E9PH68;E7EWN5;A0A0U1RRA9;Q5YLB2;P38398-8;P38398-4;P38398;P38398-7	A0A0A0MSN1	A0A0A0MSN1	Breast cancer type 1 susceptibility protein	BRCA1	GAFVTEPQIIQERPLTNKLKRKRRPTSGLHP	ASLPNLSHVTENLIIGAFVT(0.007)EPQIIQERPLT(0.993)NK	283;452;473;499;458;499;452;482;499;499	283	BRCA1_(283)		NaN	NaN	UID198	1	283	31	T	4	PPPPPPPPPPPPPPPPPPXXXXXXXXXXXXX	22-Prot-0050_RD5_1_7931_+PPAse U	190	___2	0.992914	0.0176849	58.402	27.057	58.402	-1.2037	326790	75	2499	2630
P60709;A0A2R8Y793;A0A2R8YEA7;Q6S8J3;P63261;I3L4N8	P60709;P63261	P63261	Actin, cytoplasmic 1;Actin, cytoplasmic 1, N-terminally processed;POTE ankyrin domain family member E;Actin, cytoplasmic 2;Actin, cytoplasmic 2, N-terminally processed	ACTB;POTEE;ACTG1	TAEREIVRDIKEKLCYVALDFEQEMATAASS	LCY(1)VALDFEQEMATAASSSSLEK	218;202;96;918;218;209	218;218	ACTB;POTEE;ACTG1_(218;218)		NaN	NaN	UID241	1	218	3	Y	3	XXXXXXXXXXXXXPPPPPPPPPPPPPPPPPP	22-Prot-0050_RD5_1_7931_+PPAse U	2588;2682	___2	0.999999	0.000999758	85.513	76.358	85.513	0.62287	164670	118	13434	14036
A0A087WTE6	A0A087WTE6	A0A087WTE6	SRC kinase-signaling inhibitor 1	SRCIN1	IPTLLSPQDLGPPGGSAPGPTRKAAPGPRAF	QLIPT(0.053)LLS(0.155)PQDLGPPGGS(0.777)APGPT(0.015)RKAAPGPR	83	83	SRCIN1_(83)		NaN	NaN	UID245	1	83	18	S	3	PPPPPPPPPPPPPPPPPPPPPPPPPPPPPXX	22-Prot-0050_RD5_1_7931_+PPAse U	29	___3	0.777316	0.0101066	54.418	29.185	54.418	-4.2319	400350	0	20456	21470
P22680	P22680	P22680	Cholesterol 7-alpha-monooxygenase	CYP7A1	LFAIHEIKQFLILMLSYFELELIEGQAKCPP	QFLILMLS(1)Y(1)FELELIEGQAKCPPLDQSR	463	463	CYP7A1_(463)		NaN	NaN	UID273	2	463	8	S	3	XXXXXXXXPPPPPPPPPPPPPPPPPPPPPPP	22-Prot-0050_RD5_1_7931_+PPAse U	2183	___3	0.999999	0.000273403	73.532	49.656	73.532	8.6288	1246500	28	20132	21128
Q70EL1-9;Q70EL1-10;Q70EL1-8;Q70EL1-7;Q70EL1	Q70EL1-9	Q70EL1-9	Inactive ubiquitin carboxyl-terminal hydrolase 54	USP54	AQEQLFQEKKDPANPSPVMPGIATSERGDEH	DPANPS(1)PVMPGIAT(0.5)S(0.5)ER	124;124;124;886;1036	124	USP54_(124)		NaN	NaN	UID295	2	124	6	S	2	XXXXXXXXXXPPPPPPPPPPPPPPPPPXXXX	22-Prot-0050_RD5_1_7931_+PPAse U	3261	___3	0.999963	0.00138668	42.061	25.069	42.061	-3.7663	2815200	50	3951	4135;4136
S4R364	S4R364	S4R364	Motor neuron and pancreas homeobox protein 1	MNX1	PSKVGPREPLFSPPQSRWASGSFLSIRAGHL	VGPREPLFS(0.001)PPQS(0.999)R	38	38	MNX1_(38)		NaN	NaN	UID314	1	38	13	S	2	XXXPPPPPPPPPPPPPPXXXXXXXXXXXXXX	22-Prot-0050_RD5_1_7931_+PPAse U	4512	___3	0.998757	0.00876935	44.598	14.249	44.598	0.56203	1761500	69	27054	28382
A0A0A0MSN1;A0A494C182;E9PH68;E7EWN5;A0A0U1RRA9;Q5YLB2;P38398-8;P38398-4;P38398;P38398-7	A0A0A0MSN1	A0A0A0MSN1	Breast cancer type 1 susceptibility protein	BRCA1	GAFVTEPQIIQERPLTNKLKRKRRPTSGLHP	ASLPNLSHVTENLIIGAFVT(0.007)EPQIIQERPLT(0.993)NK	283;452;473;499;458;499;452;482;499;499	283	BRCA1_(283)		NaN	NaN	UID320	1	283	31	T	4	PPPPPPPPPPPPPPPPPPXXXXXXXXXXXXX	22-Prot-0050_RD5_1_7931_+PPAse U	190	___3	0.992914	0.0176849	58.402	27.057	58.402	-1.2037	326790	75	2499	2630
A0A3B3IRX8;E7EV01;O15484	A0A3B3IRX8	A0A3B3IRX8	Calpain-5	CAPN5	EGRYVIIPTTFEPGHTGEFLLRVFTDVPSNC	Y(0.001)VIIPT(0.323)T(0.739)FEPGHT(0.917)GEFLLRVFT(0.012)DVPS(0.007)NCR	352;520;480	352	CAPN5_(352)		NaN	NaN	UID324	2	352	13	T	4	XXXPPPPPPPPPPPPPPPPPPPPPPPPPPPP	22-Prot-0050_RD5_1_7931_+PPAse U	439	___3	0.917139	1.41759e-05	80.026	62.511	42.888	0.27565	3556900	79	30339	31797
H7C4M0	H7C4M0	H7C4M0	Filamin A-interacting protein 1-like	FILIP1L	ARIPKPKSTGITKISTKAPTVPMDKPIYQNG	PKSTGIT(0.02)KIS(0.985)T(0.994)K	132	132	FILIP1L_(132)		NaN	NaN	UID334	2	132	11	T	2	XXXXXPPPPPPPPPPPPXXXXXXXXXXXXXX	22-Prot-0050_RD5_1_7931_+PPAse U	1337	___3	0.99434	0.00207259	90.263	58.122	90.263	-7.1015	8521200	89	19904	20892
P22680	P22680	P22680	Cholesterol 7-alpha-monooxygenase	CYP7A1	FAIHEIKQFLILMLSYFELELIEGQAKCPPL	QFLILMLS(1)Y(1)FELELIEGQAKCPPLDQSR	464	464	CYP7A1_(464)		NaN	NaN	UID362	2	464	9	Y	3	XXXXXXXPPPPPPPPPPPPPPPPPPPPPPPP	22-Prot-0050_RD5_1_7931_+PPAse U	2183	___3	0.999999	0.000273403	73.532	49.656	73.532	8.6288	1246500	117	20132	21128
P60709;A0A2R8Y793;A0A2R8YEA7;Q6S8J3;P63261;I3L4N8	P60709;P63261	P63261	Actin, cytoplasmic 1;Actin, cytoplasmic 1, N-terminally processed;POTE ankyrin domain family member E;Actin, cytoplasmic 2;Actin, cytoplasmic 2, N-terminally processed	ACTB;POTEE;ACTG1	TAEREIVRDIKEKLCYVALDFEQEMATAASS	LCY(1)VALDFEQEMATAASSSSLEK	218;202;96;918;218;209	218;218	ACTB;POTEE;ACTG1_(218;218)		NaN	NaN	UID363	1	218	3	Y	3	XXXXXXXXXXXXXPPPPPPPPPPPPPPPPPP	22-Prot-0050_RD5_1_7931_+PPAse U	2588;2682	___3	0.999999	0.000999758	85.513	76.358	85.513	0.62287	164670	118	13434	14036
Q8N488	Q8N488	Q8N488	RING1 and YY1-binding protein	RYBP	PRINSQLVAQQVAQQYATPPPPKKEKKEKVE	INS(0.001)QLVAQQVAQQY(1)AT(1)PPPPK	70	70	RYBP_(70)		NaN	NaN	UID365	2	70	14	Y	3	XXPPPPPPPPPPPPPPPPPPPPPXXXXXXXX	22-Prot-0050_RD5_1_7931_+PPAse U	3403	___3	0.999773	0.0063172	50.641	16.169	46.768	-5.9197	6005700	120	11180	11653;11654
H0Y3Q9;Q32MH5;Q32MH5-3	H0Y3Q9	H0Y3Q9	Protein FAM214A	FAM214A	PPSGTIQVTLFNPNKTVVKMFVVIYDLRDMP	GY(0.04)RVPPS(0.478)GT(0.478)IQVT(0.003)LFNPNKT(1)VVK	879;967;974	879	FAM214A_(879)		NaN	NaN	UID89	2	879	20	T	3	PPPPPPPPPPPPPPPPPPPXXXXXXXXXXXX	22-Prot-0048_RD3_1_7922_+PPAse H	1202	___1	0.999903	0.00112483	71.912	41.885	54.912	-8.8716	7280400	88	9137	9512
Q5T0V2;Q5T0V4;Q5T0V0;O75093-2;O75093	Q5T0V2	Q5T0V2	Slit homolog 1 protein	SLIT1	PETMTEIRLELNGIKSIPPGAFSPYRKLRRI	LELNGIKS(0.959)IPPGAFS(0.023)PY(0.019)R	323;306;323;323;323	323	SLIT1_(323)		NaN	NaN	UID142	1	323	8	S	3	XXXXXXXXPPPPPPPPPPPPPPPPPPXXXXX	22-Prot-0048_RD3_1_7922_+PPAse H	1697	___2	0.958717	0.00887944	47.57	29.472	47.57	3.2418	176420	19	13615	14224
Q13118-2;Q13118	Q13118-2	Q13118-2	Krueppel-like factor 10	KLF10	TCPMKAASILNYQNNSFRRRTHLNVEAARKN	AASILNY(0.005)QNNS(0.995)FRR	173;184	173	KLF10_(173)		NaN	NaN	UID160	1	173	11	S	2	XXXXXPPPPPPPPPPPPPPXXXXXXXXXXXX	22-Prot-0048_RD3_1_7922_+PPAse H	2839	___2	0.994603	0.0503607	50.297	44.462	50.297	9.4856	102870	37	311	327
Q969P0-3;Q969P0;C9J8Z4	Q969P0-3	Q969P0-3	Immunoglobulin superfamily member 8	IGSF8	SGKVELRVLPDVLQVSAAPPGPRGRQAPTSP	VLPDVLQVS(0.996)AAPPGPRGRQAPT(0.002)S(0.002)PPR	156;156;156	156	IGSF8_(156)		NaN	NaN	UID177	1	156	9	S	4	XXXXXXXPPPPPPPPPPPPPPPPPPPPPPPP	22-Prot-0048_RD3_1_7922_+PPAse H	3586	___2	0.996092	0.0474578	43.904	14.949	43.904	1.8908	239340	54	27749	29114
Q8NG85	Q8NG85	Q8NG85	Olfactory receptor 2L3	OR2L3	SMAYDRYIAICFPLHYPIRMSKRMCVLMITG	YIAICFPLHY(1)PIR	131	131	OR2L3_(131)		NaN	NaN	UID244	1	131	10	Y	3	XXXXXXPPPPPPPPPPPPPXXXXXXXXXXXX	22-Prot-0048_RD3_1_7922_+PPAse H	3457	___2	0.999984	0.00888652	48.157	19.83	48.157	-5.5653	208780	121	29768	31207;31208
Q5T0V2;Q5T0V4;Q5T0V0;O75093-2;O75093	Q5T0V2	Q5T0V2	Slit homolog 1 protein	SLIT1	PETMTEIRLELNGIKSIPPGAFSPYRKLRRI	LELNGIKS(0.959)IPPGAFS(0.023)PY(0.019)R	323;306;323;323;323	323	SLIT1_(323)		NaN	NaN	UID264	1	323	8	S	3	XXXXXXXXPPPPPPPPPPPPPPPPPPXXXXX	22-Prot-0048_RD3_1_7922_+PPAse H	1697	___3	0.958717	0.00887944	47.57	29.472	47.57	3.2418	176420	19	13615	14224
Q13118-2;Q13118	Q13118-2	Q13118-2	Krueppel-like factor 10	KLF10	TCPMKAASILNYQNNSFRRRTHLNVEAARKN	AASILNY(0.005)QNNS(0.995)FRR	173;184	173	KLF10_(173)		NaN	NaN	UID282	1	173	11	S	2	XXXXXPPPPPPPPPPPPPPXXXXXXXXXXXX	22-Prot-0048_RD3_1_7922_+PPAse H	2839	___3	0.994603	0.0503607	50.297	44.462	50.297	9.4856	102870	37	311	327
Q969P0-3;Q969P0;C9J8Z4	Q969P0-3	Q969P0-3	Immunoglobulin superfamily member 8	IGSF8	SGKVELRVLPDVLQVSAAPPGPRGRQAPTSP	VLPDVLQVS(0.996)AAPPGPRGRQAPT(0.002)S(0.002)PPR	156;156;156	156	IGSF8_(156)		NaN	NaN	UID299	1	156	9	S	4	XXXXXXXPPPPPPPPPPPPPPPPPPPPPPPP	22-Prot-0048_RD3_1_7922_+PPAse H	3586	___3	0.996092	0.0474578	43.904	14.949	43.904	1.8908	239340	54	27749	29114
H0Y3Q9;Q32MH5;Q32MH5-3	H0Y3Q9	H0Y3Q9	Protein FAM214A	FAM214A	PPSGTIQVTLFNPNKTVVKMFVVIYDLRDMP	GY(0.04)RVPPS(0.478)GT(0.478)IQVT(0.003)LFNPNKT(1)VVK	879;967;974	879	FAM214A_(879)		NaN	NaN	UID333	2	879	20	T	3	PPPPPPPPPPPPPPPPPPPXXXXXXXXXXXX	22-Prot-0048_RD3_1_7922_+PPAse H	1202	___3	0.999903	0.00112483	71.912	41.885	54.912	-8.8716	7280400	88	9137	9512
Q8NG85	Q8NG85	Q8NG85	Olfactory receptor 2L3	OR2L3	SMAYDRYIAICFPLHYPIRMSKRMCVLMITG	YIAICFPLHY(1)PIR	131	131	OR2L3_(131)		NaN	NaN	UID366	1	131	10	Y	3	XXXXXXPPPPPPPPPPPPPXXXXXXXXXXXX	22-Prot-0048_RD3_1_7922_+PPAse H	3457	___3	0.999984	0.00888652	48.157	19.83	48.157	-5.5653	208780	121	29768	31207;31208
P62508-4;P62508-2;P62508-3;P62508;P62508-5	P62508-4	P62508-4	Estrogen-related receptor gamma	ESRRG	GQHMEDPRRAGKMLMTLPLLRQTSTKAVQHF	AGKMLMT(0.931)LPLLRQT(0.111)S(0.111)T(0.846)K	358;397;404;420;432	358	ESRRG_(358)		NaN	NaN	UID97	2	358	7	T	2	XXXXXXXXXPPPPPPPPPPPPPPPPPXXXXX	22-Prot-0048_RD3_1_7923_+PPAse H	2651	___1	0.931339	0.0175164	46.068	23.112	46.068	-0.034155	791920	96	945	998
P62508-4;P62508-2;P62508-3;P62508;P62508-5	P62508-4	P62508-4	Estrogen-related receptor gamma	ESRRG	AGKMLMTLPLLRQTSTKAVQHFYNIKLEGKV	AGKMLMT(0.931)LPLLRQT(0.111)S(0.111)T(0.846)K	367;406;413;429;441	367	ESRRG_(367)		NaN	NaN	UID98	2	367	16	T	2	PPPPPPPPPPPPPPPPPXXXXXXXXXXXXXX	22-Prot-0048_RD3_1_7923_+PPAse H	2651	___1	0.845872	0.0175164	46.068	23.112	46.068	-0.034155	791920	97	945	998
F5GZ09;Q9BW83-2;Q9BW83;H0Y6C7	F5GZ09	F5GZ09	Intraflagellar transport protein 27 homolog	IFT27	CSKWLEKARSQAPGISLPGVLVGNKTDLAGR	ARSQAPGIS(1)LPGVLVGNK	154;114;115;90	154	IFT27_(154)		NaN	NaN	UID132	1	154	9	S	2	XXXXXXXPPPPPPPPPPPPPPPPPPXXXXXX	22-Prot-0048_RD3_1_7923_+PPAse H	1063	___2	0.999973	0.00582744	61.042	21.34	61.042	-0.63599	3996800	9	2376	2496
Q53TS8-4	Q53TS8-4	Q53TS8-4	Amyotrophic lateral sclerosis 2 chromosomal region candidate gene 11 protein	ALS2CR11	KQDLNNWLSEKDILNSKTTLSQIIKNIPADS	KQDLNNWLS(0.038)EKDILNS(0.962)K	744	744	ALS2CR11_(744)		NaN	NaN	UID166	1	744	16	S	2	PPPPPPPPPPPPPPPPPXXXXXXXXXXXXXX	22-Prot-0048_RD3_1_7923_+PPAse H	3106	___2	0.961752	0.00947263	51.569	31.679	51.569	-2.3605	330360	43	12795	13356
Q9UBW7;A0A087X151;Q9UBW7-2	Q9UBW7	Q9UBW7	Zinc finger MYM-type protein 2	ZMYM2	KNEELQGNDSKITPSSKELASQKGSVSETIV	ITPS(0.012)S(0.969)KELAS(0.018)QK	103;103;103	103	ZMYM2_(103)		NaN	NaN	UID187	1	103	5	S	2	XXXXXXXXXXXPPPPPPPPPPPPXXXXXXXX	22-Prot-0048_RD3_1_7923_+PPAse H	4210	___2	0.969395	0.0113312	65.404	18.055	65.404	2.0507	550890	64	11803	12312
P45877	P45877	P45877	Peptidyl-prolyl cis-trans isomerase C	PPIC	PDTNGSQFFITLTKPTWLDGKHVVFGKVIDG	PT(1)WLDGKHVVFGK	154	154	PPIC_(154)		NaN	NaN	UID218	1	154	2	T	3	XXXXXXXXXXXXXXPPPPPPPPPPPPPXXXX	22-Prot-0048_RD3_1_7923_+PPAse H	2403	___2	1	0.015935	50.314	22.725	50.314	4.7046	297250	95	19950	20940;20941
F5GZ09;Q9BW83-2;Q9BW83;H0Y6C7	F5GZ09	F5GZ09	Intraflagellar transport protein 27 homolog	IFT27	CSKWLEKARSQAPGISLPGVLVGNKTDLAGR	ARSQAPGIS(1)LPGVLVGNK	154;114;115;90	154	IFT27_(154)		NaN	NaN	UID254	1	154	9	S	2	XXXXXXXPPPPPPPPPPPPPPPPPPXXXXXX	22-Prot-0048_RD3_1_7923_+PPAse H	1063	___3	0.999973	0.00582744	61.042	21.34	61.042	-0.63599	3996800	9	2376	2496
Q53TS8-4	Q53TS8-4	Q53TS8-4	Amyotrophic lateral sclerosis 2 chromosomal region candidate gene 11 protein	ALS2CR11	KQDLNNWLSEKDILNSKTTLSQIIKNIPADS	KQDLNNWLS(0.038)EKDILNS(0.962)K	744	744	ALS2CR11_(744)		NaN	NaN	UID288	1	744	16	S	2	PPPPPPPPPPPPPPPPPXXXXXXXXXXXXXX	22-Prot-0048_RD3_1_7923_+PPAse H	3106	___3	0.961752	0.00947263	51.569	31.679	51.569	-2.3605	330360	43	12795	13356
Q9UBW7;A0A087X151;Q9UBW7-2	Q9UBW7	Q9UBW7	Zinc finger MYM-type protein 2	ZMYM2	KNEELQGNDSKITPSSKELASQKGSVSETIV	ITPS(0.012)S(0.969)KELAS(0.018)QK	103;103;103	103	ZMYM2_(103)		NaN	NaN	UID309	1	103	5	S	2	XXXXXXXXXXXPPPPPPPPPPPPXXXXXXXX	22-Prot-0048_RD3_1_7923_+PPAse H	4210	___3	0.969395	0.0113312	65.404	18.055	65.404	2.0507	550890	64	11803	12312
P45877	P45877	P45877	Peptidyl-prolyl cis-trans isomerase C	PPIC	PDTNGSQFFITLTKPTWLDGKHVVFGKVIDG	PT(1)WLDGKHVVFGK	154	154	PPIC_(154)		NaN	NaN	UID340	1	154	2	T	3	XXXXXXXXXXXXXXPPPPPPPPPPPPPXXXX	22-Prot-0048_RD3_1_7923_+PPAse H	2403	___3	1	0.015935	50.314	22.725	50.314	4.7046	297250	95	19950	20940;20941
P62508-4;P62508-2;P62508-3;P62508;P62508-5	P62508-4	P62508-4	Estrogen-related receptor gamma	ESRRG	GQHMEDPRRAGKMLMTLPLLRQTSTKAVQHF	AGKMLMT(0.931)LPLLRQT(0.111)S(0.111)T(0.846)K	358;397;404;420;432	358	ESRRG_(358)		NaN	NaN	UID341	2	358	7	T	2	XXXXXXXXXPPPPPPPPPPPPPPPPPXXXXX	22-Prot-0048_RD3_1_7923_+PPAse H	2651	___3	0.931339	0.0175164	46.068	23.112	46.068	-0.034155	791920	96	945	998
P62508-4;P62508-2;P62508-3;P62508;P62508-5	P62508-4	P62508-4	Estrogen-related receptor gamma	ESRRG	AGKMLMTLPLLRQTSTKAVQHFYNIKLEGKV	AGKMLMT(0.931)LPLLRQT(0.111)S(0.111)T(0.846)K	367;406;413;429;441	367	ESRRG_(367)		NaN	NaN	UID342	2	367	16	T	2	PPPPPPPPPPPPPPPPPXXXXXXXXXXXXXX	22-Prot-0048_RD3_1_7923_+PPAse H	2651	___3	0.845872	0.0175164	46.068	23.112	46.068	-0.034155	791920	97	945	998

## Sheet: 06-modification spec pep Psty
Sequence	Modifications	Phospho (STY) site IDs	Proteins	Gene Names	Protein Names	Intensity-ratio without/with ʎ-Ppase	Median Intensity phosphopeptides without ʎ-PPase	Median Intensity phosphopeptides with ʎ-PPase	Intensity 26a_IS-PPAse-H	Intensity 26b_IS-PPAse-H	Intensity 28a_IS-PPAse-U	Intensity 28b_IS-PPAse-U	Intensity 25a_IS+PPAse-H	Intensity 25b_IS+PPAse-H	Intensity 27a_IS+PPAse-U	Intensity 27b_IS+PPAse-U	Intensity	Mass	Mass Fractional Part	Retention time	Calibrated retention time	Charges	PEP	MS/MS scan number	Raw file	Score	Delta score	Protein Groups-ID	Evidence IDs	Unique (Groups)	Unique (Proteins)	Acetyl (Protein N-term)	Deamidation (N)	Oxidation (MP)	Phospho (STY)	Missed cleavages	Identification type 25a_IS+PPAse-H	Identification type 25b_IS+PPAse-H	Identification type 26a_IS-PPAse-H	Identification type 26b_IS-PPAse-H	Identification type 27a_IS+PPAse-U	Identification type 27b_IS+PPAse-U	Identification type 28a_IS-PPAse-U	Identification type 28b_IS-PPAse-U	Fraction Average	Fraction Std. Dev.	Fraction 1	Experiment 25a_IS+PPAse-H	Experiment 25b_IS+PPAse-H
PRTIYGVSKVHAELMGEISDA	Phospho (STY);2 Oxidation (MP)	52;107	Q8IZJ6-3	TDH (SDR14E1P)	Inactive L-threonine 3-dehydrogenase, mitochondrial	153.658	1149900	7483.5	NaN	NaN	1218000	1081800	7483.5	NaN	1464000	983.37	3772100	2384.11	0.108327	110.76	110.7	2	0.0039911	49994	22-Prot-0051_RD6_1_7935	42.941	17.756	3381	177750;177751;177752;177753;177754;177755	yes	yes	0	0	2	1	2	By matching				By matching	By matching	By matching	By MS/MS	1	0	6	1
VGPREPLFSPPQSR	Phospho (STY);4 Oxidation (MP)	69	S4R364	MNX1	Motor neuron and pancreas homeobox protein 1	131.496	1457500	11084	11650	NaN	1495700	1457500	11084	7995.7	NaN	1761500	4745400	1709.78	0.777414	72.429	72.383	2	0.0087693	26427	22-Prot-0050_RD5_1_7931	44.598	14.249	4512	240947;240948;240949;240950;240951;240952	yes	yes	0	0	4	1	1	By matching	By matching	By matching			By MS/MS	By matching	By matching	1	0	6	1	1
LIPNATGTGTFSPGASPGSEARTTGDISVEKLNLGTDSDSSPQK	Phospho (STY);2 Deamidation (N);2 Oxidation (MP)		Q16512;Q16512-2;Q16512-3;K7EN76	PKN1	Serine/threonine-protein kinase N1	92.3869	887090	9601.9	887090	NaN	NaN	NaN	NaN	9601.9	NaN	NaN	896700	4474.05	0.0548368	96.769	96.784	4	1			NaN	NaN	3051	129456;129457	no	no	0	2	2	1	2		By matching	By matching						1	0	2		1
LVFAAYGNVFSAFARNK	Phospho (STY);2 Deamidation (N)		A0A0A0MTB8;Q8NI36	WDR36	WD repeat-containing protein 36	56.8342	512548	9018.3	1022700	2396.3	NaN	NaN	NaN	9018.3	NaN	NaN	1034100	1955.92	0.918265	72.265	72.27	3	1			NaN	NaN	201	148881;148882;148883	no	no	0	2	0	1	1		By matching	By matching	By matching					1	0	3		1
DPANPSPVMPGIATSER	2 Phospho (STY)	50;51;106	Q70EL1-9;Q70EL1-10;Q70EL1-8;Q70EL1-7;Q70EL1	USP54	Inactive ubiquitin carboxyl-terminal hydrolase 54	43.3356	2.41336e+06	55690	52915	48490	4773800	4869000	55690	54798	NaN	2815200	12670000	1897.77	0.768245	104.01	103.95	2	0.0013867	34338	22-Prot-0050_RD5_1_7931	42.061	25.069	3261	34994;34995;34996;34997;34998;34999;35000;35001;35002	yes	no	0	0	0	2	0	By matching	By matching	By matching	By matching		By MS/MS	By matching	By matching	1	0	9	1	1
TVSLGAGAKDELHIVEAEAMNYEGSPIKVTLATLK	Phospho (STY)	22	P06748;P06748-2;P06748-3	NPM1	Nucleophosmin	34.8346	925870	26579	706440	495380	1145300	1184200	NaN	26579	NaN	NaN	3557800	3734.88	0.884194	101.93	101.88	3;4	3.7395e-147	51136	22-Prot-0049_RD4_1_7927	208.7	196.01	1946	232895;232896;232897;232898;232899;232900;232901;232902;232903	yes	no	0	0	0	1	2		By matching	By MS/MS	By MS/MS			By matching	By MS/MS	1	0	9		1
LERFLFTCNLLGSVIFITCISLNR	2 Phospho (STY);2 Deamidation (N)		A0A0B4J1V8;Q96G91	PPAN-P2RY11;P2RY11	P2Y purinoceptor 11	23.8469	390088	16358	759830	1.9892e+06	20346	18513	561570	NaN	16358	14221	3380100	3047.43	0.430268	100.77	100.73	3;4	1			NaN	NaN	217	122075;122076;122077;122078;122079;122080;122081;122082	no	no	0	2	0	2	1	By matching		By matching	By matching	By matching	By matching	By matching	By matching	1	0	8	1
SLESFVELMKTIYEQELK	2 Phospho (STY)	84;115	CON__Q6KB66-1;Q6KB66-2;Q6KB66;Q6KB66-3	KRT80	Keratin, type II cytoskeletal 80	17.3741	62069	3572.5	NaN	62069	NaN	NaN	NaN	NaN	3572.5	NaN	65642	2346.05	0.0507336	103.07	103.04	2	0.020704	38328	22-Prot-0049_RD4_1_7927	55.604	18.458	827	200597;200598	yes	no	0	0	0	2	1				By MS/MS	By matching				1	0	2
LLTYNSLYKK	Phospho (STY)	45	Q5JR04;Q9HCE1-2;Q9HCE1	MOV10	Putative helicase MOV-10	9.32522	328560	35233.5	550970	106150	NaN	NaN	59473	184510	10994	8332.9	920430	1321.67	0.668304	82.799	82.794	2	0.031203	11962	22-Prot-0049_RD4_1_7926	45.489	7.7667	3121	137420;137421;137422;137423;137424;137425	yes	no	0	0	0	1	1	By matching	By matching	By MS/MS	By matching	By matching	By matching			1	0	6	1	1
GSVLNSYSAQPNFGAPASPAGSNPAR	Phospho (STY);2 Deamidation (N);2 Oxidation (MP)		B4DHE8	MSI2	RNA-binding protein Musashi homolog 2	8.51778	323608	37992	627390	NaN	19825	NaN	475520	NaN	37992	23496	1184200	2630.13	0.128604	101.76	101.72	2	1			NaN	NaN	599	77207;77208;77209;77210;77211	no	no	0	2	2	1	0	By matching		By matching		By matching	By matching	By matching		1	0	5	1
SYIFIDEAHITQSLTWLSQMQK	Phospho (STY);Oxidation (MP)		P20742-2;P20742	PZP	Pregnancy zone protein	7.77452	358790	46149.5	525950	358790	NaN	35013	NaN	NaN	41338	50961	1012100	2734.27	0.271369	84.555	84.522	3	1			NaN	NaN	2160	212753;212754;212755;212756;212757	no	no	0	0	1	1	0			By matching	By matching	By matching	By matching		By matching	1	0	5
ALIPLQTEAHPETKQRVLTNYMFPQQPR	2 Phospho (STY);2 Oxidation (MP)	73;74	A0A075B6E9;A0A494C1A4;Q96NW7-2;Q96NW7	LRRC7	Leucine-rich repeat-containing protein 7	4.11421	858225	208600	1699600	16850	NaN	NaN	NaN	NaN	NaN	208600	1925000	3497.66	0.656791	89.714	89.696	4	0.0091953	63217	22-Prot-0049_RD4_1_7926	48.201	26.533	10	14587;14588;14589	yes	no	0	0	2	2	2			By MS/MS	By matching		By matching			1	0	3
INSQLVAQQVAQQYATPPPPK	2 Phospho (STY);2 Oxidation (MP)	108;120	Q8N488	RYBP	RING1 and YY1-binding protein	3.67544	153130	41663	NaN	NaN	NaN	153130	NaN	NaN	31716	51610	236450	2469.13	0.134221	72.448	72.39	3	1			NaN	NaN	3403	99941;99942;99943	yes	yes	0	0	2	2	0					By matching	By matching		By matching	1	0	3
FLENALAVSTKYHGPKALK	Phospho (STY);Deamidation (N)		I3L2B0;A0A494C0R8;K7EIG1;O75153	CLUH	Clustered mitochondria protein homolog	3.61321	23285.7	6444.6	41521	41342	5175.4	5229.4	NaN	35904	5419.5	6444.6	141040	2167.11	0.107856	104.07	104.02	3	1			NaN	NaN	483;1702	54796;54797;54798;54799;54800;54801;54802	no	no	0	1	0	1	2		By matching	By matching	By matching	By matching	By matching	By matching	By matching	1	0	7		1
VDLKPLLSSLSANK	2 Phospho (STY);Deamidation (N);Oxidation (MP)	2;3	B0QYZ7;B1AKL4;Q9NRA8-2;Q9NRA8;Q9NRA8-3	EIF4ENIF1	Eukaryotic translation initiation factor 4E transporter	3.40819	175184	51401	99089	NaN	251280	NaN	51401	NaN	NaN	NaN	401770	1660.77	0.772585	107.71	107.68	2	0.00078572	24503	22-Prot-0051_RD6_1_7934	57.888	17.355	566	236860;236861;236862	yes	no	0	1	1	2	1	By matching		By MS/MS				By MS/MS		1	0	3	1
RPHTPTPGIYMGRPTYGSSR	Phospho (STY)	99	P62995-3;P62995;H7BXF3;H7C2L4	TRA2B	Transformer-2 protein homolog beta	3.33477	43252	12970	NaN	NaN	NaN	43252	12970	NaN	NaN	NaN	56223	2310.07	0.0728845	37.505	37.431	4	0.0059457	48051	22-Prot-0051_RD6_1_7935	49.718	44.902	2671	189541;189542	yes	no	0	0	0	1	2	By matching							By MS/MS	1	0	2	1
RTLTTGSSAYLWKPPSR	Phospho (STY);Oxidation (MP)		Q9BQS8;Q9BQS8-4;Q9BQS8-3;Q9BQS8-2	FYCO1	FYVE and coiled-coil domain-containing protein 1	3.19269	30676	9608.2	46171	15181	NaN	NaN	NaN	29784	9608.2	8143.5	108890	2015.98	0.98299	94.131	94.115	2	1			NaN	NaN	3790	190114;190115;190116;190117;190118	no	no	0	0	1	1	2		By matching	By matching	By matching	By matching	By matching			1	0	5		1
MPQNVAKTEPVSILQPQTTVNPDRIK	Acetyl (Protein N-term);Phospho (STY);2 Deamidation (N);Oxidation (MP)	86	F8VW64;G8JLA5	NOVA1	RNA-binding protein Nova-1	2.59356	185490	71519.5	NaN	2810400	185490	123520	379170	110260	32779	709.17	3642400	3043.49	0.493718	81.636	81.591	3;4	0.024194	47597	22-Prot-0049_RD4_1_7927	47.491	28.778	1116	161030;161031;161032;161033;161034;161035;161036;161037;161038;161039	yes	no	1	2	1	1	2	By matching	By matching		By MS/MS	By matching	By matching	By matching	By matching	1	0	10	1	1
PNLILNVDGLIGVAFVDMLRNCGSFTR	Phospho (STY);2 Deamidation (N);Oxidation (MP)		P53396-2;P53396;P53396-3	ACLY	ATP-citrate synthase	2.34247	12165.8	5193.6	32726	17496	5408.6	6835.7	NaN	16714	5193.6	4417.3	88791	3088.48	0.476293	99.806	99.761	4	1			NaN	NaN	2537	177668;177669;177670;177671;177672;177673;177674	no	no	0	2	1	1	1		By matching	By matching	By matching	By matching	By matching	By matching	By matching	1	0	7		1
GYRVPPSGTIQVTLFNPNKTVVK	2 Phospho (STY);2 Deamidation (N);Oxidation (MP)	11;87;88	H0Y3Q9;Q32MH5;Q32MH5-3	FAM214A	Protein FAM214A	2.13942	3912450	1828745	4181200	3.6437e+06	NaN	NaN	3099200	NaN	558290	NaN	11482000	2692.29	0.29145	90.49	90.481	3	0.0011248	54775	22-Prot-0049_RD4_1_7926	71.912	41.885	1202	80737;80738;80739;80740	yes	no	0	2	1	2	2	By MS/MS		By MS/MS	By matching	By matching				1	0	4	1
RQPPLLPPKGNPWTK	Phospho (STY);Deamidation (N);Oxidation (MP)	80	A0A3B3IT29;A0A3B3ISF8;A0A3B3ISF0	LARP1B	La-related protein 1B	2.09716	130045	62010	128520	109860	160080	131570	55059	62010	156610	NaN	803710	1824.93	0.92877	91.346	91.305	2	0.0053614	31154	22-Prot-0051_RD6_1_7934	41.824	7.6313	441	189839;189840;189841;189842;189843;189844;189845	yes	no	0	1	1	1	2	By matching	By matching	By matching	By matching	By MS/MS		By MS/MS	By MS/MS	1	0	7	1	1
LVQLYAVVSEEPIYIVTEYMSK	2 Phospho (STY);Oxidation (MP)		P12931;P12931-2	SRC	Proto-oncogene tyrosine-protein kinase Src	2.01433	63334.5	31442	241680	101950	18093	24719	150520	NaN	28360	31442	596770	2749.26	0.261455	102.22	102.17	2	1			NaN	NaN	2056	150362;150363;150364;150365;150366;150367;150368	no	no	0	0	1	2	0	By matching		By matching	By matching	By matching	By matching	By matching	By matching	1	0	7	1
LIQRIRSEIENVK	Phospho (STY)	6	CON__Q3SY84;Q3SY84	KRT71	Keratin, type II cytoskeletal 71	1.97074	36635	18589.5	36635	NaN	NaN	NaN	15496	21683	NaN	NaN	73814	1676.9	0.89747	60.256	60.261	4	0.02664	23737	22-Prot-0049_RD4_1_7926	41.796	20.645	814	129569;129570;129571	yes	no	0	0	0	1	2	By matching	By matching	By MS/MS						1	0	3	1	1
VFYGSLPNIGIISSVQR	3 Phospho (STY);Oxidation (MP)	70;71;72	U3KQB5	TGIF2	Homeobox protein TGIF2	1.95643	332810	170111	1919.7	NaN	337060	332810	2142.4	4622.3	335600	347260	1361400	2104.9	0.903689	105.15	105.11	2	0.00635	42403	22-Prot-0051_RD6_1_7934	40.861	15.273	4515	239648;239649;239650;239651;239652;239653;239654	yes	yes	0	0	1	3	0	By matching	By matching	By matching		By matching	By matching	By MS/MS	By matching	1	0	7	1	1
ARSQAPGISLPGVLVGNK	Phospho (STY);Deamidation (N);2 Oxidation (MP)	9	F5GZ09;Q9BW83-2;Q9BW83;H0Y6C7	IFT27	Intraflagellar transport protein 27 homolog	1.78702	2999875	1678700	5435600	564150	NaN	NaN	1441700	1.9157e+06	NaN	NaN	9357200	1875.95	0.945542	93.4	93.405	2;3	0.0058274	31511	22-Prot-0049_RD4_1_7926	55.866	29.401	1063	21380;21381;21382;21383;21384;21385;21386;21387;21388;21389;21390	yes	no	0	1	2	1	1	By matching	By MS/MS	By MS/MS	By matching					1	0	11	3	3
LLPNLLSLKNHSR	Phospho (STY);Deamidation (N);Oxidation (MP)	17	O15015-1;O15015	ZNF646	Zinc finger protein 646	1.71994	52504.5	30527	124610	94535	10474	10442	NaN	49283	NaN	11771	301120	1600.83	0.833807	75.596	75.551	3	0.018356	20971	22-Prot-0049_RD4_1_7926	50.297	29.146	1561	135984;135985;135986;135987;135988;135989	yes	no	0	1	1	1	1		By matching	By MS/MS	By matching		By matching	By matching	By matching	1	0	6		1
RRDISNTLIMLADK	Phospho (STY);Deamidation (N);Oxidation (MP)		E9PCS8;E7EQY4;E7EV10;Q9BTC8-2;Q9BTC8;E9PF88	MTA3	Metastasis-associated protein MTA3	1.69662	32358	19072	32358	NaN	NaN	NaN	NaN	NaN	NaN	19072	51429	1741.84	0.843385	74.986	74.986	2	1			NaN	NaN	925	189900;189901	no	no	0	1	1	1	2			By matching			By matching			1	0	2
DLYNWLEVEFNPLKLCERVTK	Phospho (STY);2 Deamidation (N);Oxidation (MP)		Q14152;Q14152-2	EIF3A	Eukaryotic translation initiation factor 3 subunit A	1.69369	35366	20881	NaN	NaN	38096	32636	20881	19212	43607	NaN	154430	2763.29	0.286685	67.66	67.6	4	1			NaN	NaN	2917	34241;34242;34243;34244;34245	no	no	0	2	1	1	2	By matching	By matching			By matching		By matching	By matching	1	0	5	1	1
RHILLQYLILFQYLK	Phospho (STY)		A0A087WWS1;Q96FV9;A0A087WY84;Q96FV9-2;R4GMN4	THOC1	THO complex subunit 1	1.59006	18896.5	11884.2	22706	NaN	NaN	15087	6573.3	NaN	17195	NaN	61561	2040.13	0.132555	108.93	108.9	3	1			NaN	NaN	72	188084;188085;188086;188087	no	no	0	0	0	1	1	By matching		By matching		By matching			By matching	1	0	4	1
TRRLSPSASPPR	Phospho (STY);Oxidation (MP)		A9Z1X7;Q8IYB3-2;Q8IYB3;E9PCT1;M0R088	SRRM1	Serine/arginine repetitive matrix protein 1	1.53866	59694	38796	78850	59694	31181	NaN	47076	50078	30516	30057	327450	1419.7	0.698376	96.389	96.358	2	1			NaN	NaN	559	228616;228617;228618;228619;228620;228621;228622	no	no	0	0	1	1	2	By matching	By matching	By matching	By matching	By matching	By matching	By matching		1	0	7	1	1
NSLTAKATAVLLYHLFTSVAPP	3 Phospho (STY);Oxidation (MP)		H3BPJ0	SNAP23	Synaptosomal-associated protein 23	1.46592	113456	77396	193790	33123	NaN	NaN	NaN	77396	NaN	NaN	304310	2569.17	0.167174	94.257	94.261	2	1			NaN	NaN	1292	174169;174170;174171	no	no	0	0	1	3	1		By matching	By matching	By matching					1	0	3		1
AASILNYQNNSFRR	Phospho (STY);Deamidation (N)	37	Q13118-2;Q13118	KLF10	Krueppel-like factor 10	1.44639	148790	102870	153150	144430	NaN	NaN	102870	119760	16508	NaN	536720	1733.79	0.788647	84.291	84.29	2	0.050361	21343	22-Prot-0048_RD3_1_7922	50.297	44.462	2839	2511;2512;2513;2514;2515	yes	no	0	1	0	1	1	By MS/MS	By matching	By matching	By matching	By matching				1	0	5	1	1
MGAPESGLAEYLFDKHTLGDSDNES	Phospho (STY)		P02794;G3V1D1;G3V192	FTH1	Ferritin heavy chain;Ferritin heavy chain, N-terminally processed;Ferritin	1.40951	59158	41970.5	67923	59158	NaN	53562	40239	43702	NaN	NaN	264580	2762.14	0.141871	91.689	91.665	3	1			NaN	NaN	1892	156161;156162;156163;156164;156165	no	no	0	0	0	1	1	By matching	By matching	By matching	By matching				By matching	1	0	5	1	1
ASLPNLSHVTENLIIGAFVTEPQIIQERPLTNK	Phospho (STY);2 Deamidation (N);Oxidation (MP)	75	A0A0A0MSN1;A0A494C182;E9PH68;E7EWN5;A0A0U1RRA9;Q5YLB2;P38398-8;P38398-4;P38398;P38398-7	BRCA1	Breast cancer type 1 susceptibility protein	1.35038	222475	164750	NaN	145790	NaN	299160	164750	134910	NaN	326790	1071400	3739.91	0.907372	114.24	114.21	4	0.017685	71179	22-Prot-0050_RD5_1_7931	58.402	27.057	190	22575;22576;22577;22578;22579	yes	no	0	2	1	1	1	By matching	By matching		By matching		By MS/MS		By matching	1	0	5	1	1
GFNSVATARIFYKLMLR	Phospho (STY);Deamidation (N);Oxidation (MP)		P07099	EPHX1	Epoxide hydrolase 1	1.33257	32732	24563	53983	32732	6991.4	NaN	24563	NaN	NaN	NaN	118270	2083.03	0.0325828	49.114	49.076	2	1			NaN	NaN	1950	66285;66286;66287;66288	no	no	0	1	1	1	2	By matching		By matching	By matching			By matching		1	0	4	1
MKPNTLVIGYKK	Phospho (STY);Oxidation (MP)	77	H0YLJ2;A0A2R8Y6V7;Q13621-3;Q13621	SLC12A1	Solute carrier family 12 member 1	1.33165	335230	251740	686010	458160	212300	128820	411350	NaN	224010	251740	2372400	1486.76	0.761887	87.327	87.28	2	0.0042427	18032	22-Prot-0050_RD5_1_7931	40.502	17.449	401	158220;158221;158222;158223;158224;158225;158226	yes	no	0	0	1	1	2	By matching		By matching	By matching	By matching	By MS/MS	By matching	By matching	1	0	7	1
VFLSGMPELRLGLNDKVLFDNTGR	Phospho (STY);2 Deamidation (N);2 Oxidation (MP)		K7EJL1;Q9BXS5;Q9BXS5-2;E7ENJ6	AP1M1	AP-1 complex subunit mu-1	1.32552	233120	175870	204440	163910	262330	261800	175870	172890	NaN	289690	1530900	2804.35	0.345597	46.461	46.412	4	1			NaN	NaN	1420	239071;239072;239073;239074;239075;239076;239077	no	no	0	2	2	1	2	By matching	By matching	By matching	By matching		By matching	By matching	By matching	1	0	7	1	1
KQDLNNWLSEKDILNSK	Phospho (STY);Deamidation (N)	43	Q53TS8-4	Amyotrophic lateral sclerosis 2 chromosomal region candidate gene 11 protein	ALS2CR11	1.28032	139080	108629	260400	139080	28477	NaN	123570	191270	84641	93688	921130	2125.01	0.00926444	87.038	87.011	2	0.0094726	32657	22-Prot-0048_RD3_1_7923	51.569	31.679	3106	114338;114339;114340;114341;114342;114343;114344	yes	yes	0	1	0	1	2	By matching	By MS/MS	By matching	By MS/MS	By matching	By matching	By matching		1	0	7	1	1
YIAICFPLHYPIR	Phospho (STY);Oxidation (MP)	121	Q8NG85	OR2L3	Olfactory receptor 2L3	1.23399	139910	113380	NaN	115760	139910	148870	105300	113380	160340	NaN	783560	1757.84	0.836449	58.716	58.661	3	0.0090225	22065	22-Prot-0048_RD3_1_7922	40.502	13.923	3457	265227;265228;265229;265230;265231;265232	yes	yes	0	0	1	1	0	By MS/MS	By matching		By matching	By matching		By matching	By matching	1	0	6	1	1
LVSLRSTTPEELYQRK	3 Phospho (STY)		A2RRP1-2;A2RRP1	NBAS	Neuroblastoma-amplified sequence	1.1553	157190	136060	1417.3	NaN	157190	168820	NaN	NaN	136060	NaN	463480	2158.95	0.946617	102.14	102.07	2	1			NaN	NaN	510	150667;150668;150669;150670	no	no	0	0	0	3	2			By matching		By matching		By matching	By matching	1	0	4
VLDLIVNGISINSAYTSKILPPEK	Phospho (STY);Oxidation (MP)		P23634-5;P23634-4;P23634-3;P23634-2;P23634-7;P23634-6;P23634-8;P23634	ATP2B4	Plasma membrane calcium-transporting ATPase 4	1.15162	92549	80364	92549	17333	96921	NaN	18884	79024	81704	98325	484740	2679.41	0.4136	103.8	103.77	3;4	1			NaN	NaN	2194	245592;245593;245594;245595;245596;245597;245598;245599;245600	no	no	0	0	1	1	1	By matching	By matching	By matching	By matching	By matching	By matching	By matching		1	0	9	1	1
ILGDKVNNTAVIEKQVLELWDR	Phospho (STY);2 Deamidation (N)		Q9H330;H7C0G1;Q9H330-3	TMEM245	Transmembrane protein 245	1.1336	105687	93231	NaN	NaN	112220	99154	NaN	NaN	93231	NaN	304600	2634.33	0.330599	100.38	100.29	3	1			NaN	NaN	3939	96064;96065;96066	no	no	0	2	0	1	2					By matching		By matching	By matching	1	0	3
PGQAPVLVVYDDSDR	Phospho (STY);2 Oxidation (MP)		P80748	IGLV3-21 · 117	Ig lambda chain V-III region LOI	1.13267	56421.5	49813	NaN	69544	43299	NaN	53425	58949	46201	44663	316080	1741.76	0.75601	63.793	63.76	2	1			NaN	NaN	2713	177481;177482;177483;177484;177485;177486	no	no	0	0	2	1	0	By matching	By matching		By matching	By matching	By matching	By matching		1	0	6	1	1
LISGLPSLNHPVEPKNSEK	Phospho (STY);2 Deamidation (N);Oxidation (MP)		Q14CX7;Q14CX7-2	NAA25	N-alpha-acetyltransferase 25, NatB auxiliary subunit	1.09968	59461	54071	NaN	59461	NaN	NaN	57419	50723	NaN	NaN	167600	2156.04	0.0402302	114.4	114.4	2	1			NaN	NaN	2969	129688;129689;129690	no	no	0	2	1	1	1	By matching	By matching		By matching					1	0	3	1	1
NPKSPLACTNK	Phospho (STY);2 Oxidation (MP)	112	Q9Y253	POLH	DNA polymerase eta	1.08464	371760	342750	367690	314040	375830	396800	302370	NaN	383130	NaN	2139900	1340.58	0.579566	55.997	55.943	2	0.010222	13200	22-Prot-0051_RD6_1_7935	62.969	25.246	4334	172936;172937;172938;172939;172940;172941	yes	yes	0	0	2	1	1	By matching		By matching	By matching	By MS/MS		By matching	By MS/MS	1	0	6	1
RASSLNFLNK	2 Phospho (STY)		Q9H0B6;Q9H0B6-2;A8MZ87	KLC2	Kinesin light chain 2	1.06029	38674	36475	NaN	NaN	NaN	38674	NaN	NaN	36475	NaN	75149	1308.56	0.562867	104.35	104.28	2	1			NaN	NaN	3909	187306;187307	no	no	0	0	0	2	1					By matching			By matching	1	0	2
LLLAADPGGSPAQRRR	Phospho (STY);2 Oxidation (MP)	46	Q5SQI0-7;Q5SQI0-6;Q5SQI0-5;Q5SQI0-4;Q5SQI0-3;Q5SQI0-2;Q5SQI0	ATAT1	Alpha-tubulin N-acetyltransferase 1	1.05734	39573	37427	93809	66996	12150	11683	60143	96964	14711	6280.2	362740	1788.9	0.899595	87.795	87.755	2	0.015712	22787	22-Prot-0049_RD4_1_7927	43.306	20.408	3139	134875;134876;134877;134878;134879;134880;134881;134882	yes	no	0	0	2	1	2	By matching	By matching	By matching	By MS/MS	By matching	By matching	By matching	By matching	1	0	8	1	1
LNCYKITLECLPQNVGFYK	Phospho (STY);Deamidation (N);Oxidation (MP)		Q96EK6;G3V5E4	GNPNAT1	Glucosamine 6-phosphate N-acetyltransferase	1.04693	616330	588700	NaN	NaN	NaN	616330	NaN	NaN	668790	508610	1793700	2456.12	0.11572	73.776	73.719	3	1			NaN	NaN	3637	138927;138928;138929	no	no	0	1	1	1	1					By matching	By matching		By matching	1	0	3
FRCPEALFQPCFLGMESCGIHKTTFNSIVK	Phospho (STY);2 Oxidation (MP)		Q9BYX7	POTEKP	Putative beta-actin-like protein 3;Putative beta-actin-like protein 3, N-terminally processed	1.0461	28284	27037.5	NaN	NaN	NaN	28284	NaN	NaN	26895	27180	82359	3685.66	0.659102	98.695	98.628	4	1			NaN	NaN	3880	58262;58263;58264	no	no	0	0	2	1	2					By matching	By matching		By matching	1	0	3
QLIPTLLSPQDLGPPGGSAPGPTRKAAPGPR	Phospho (STY);4 Oxidation (MP)	0	A0A087WTE6	SRCIN1	SRC kinase-signaling inhibitor 1	1.03849	398260	383500	NaN	NaN	359670	436850	NaN	NaN	366650	400350	1563500	3189.62	0.618341	101.81	101.73	3	0.010107	66825	22-Prot-0050_RD5_1_7931	54.418	29.185	29	182385;182386;182387;182388	yes	yes	0	0	4	1	2					By matching	By MS/MS	By matching	By matching	1	0	4
ADIEVACYGYEGIDAVKEALRAGLNCSTENMPIK	Phospho (STY);2 Deamidation (N);2 Oxidation (MP)		P05198;G3V4T5;H0YJS4	EIF2S1	Eukaryotic translation initiation factor 2 subunit 1	1.03635	185320	178820	174390	174570	196070	210460	180660	178820	158910	NaN	1273900	3870.7	0.703923	101.34	101.31	3	1			NaN	NaN	1925	3775;3776;3777;3778;3779;3780;3781	no	no	0	2	2	1	2	By matching	By matching	By matching	By matching	By matching		By matching	By matching	1	0	7	1	1
PTWLDGKHVVFGK	Phospho (STY);Oxidation (MP)	95	P45877	PPIC	Peptidyl-prolyl cis-trans isomerase C	1.03609	50277.5	48526	64327	36228	NaN	NaN	38607	38463	58445	70349	306420	1578.76	0.759579	49.4	49.387	3	1			NaN	NaN	2403	177850;177851;177852;177853;177854;177855	yes	yes	0	0	1	1	1	By matching	By matching	By matching	By matching	By matching	By matching			1	0	6	1	1
TNRTLSYRTGLK	2 Phospho (STY)	91;116	M0QX27;M0R2E9;M0R0H5;M0QYR6;M0R1I2;Q03405-2;Q03405-3;Q03405	PLAUR	Urokinase plasminogen activator surface receptor	1.0358	44936.5	43383.5	NaN	NaN	60274	29599	NaN	NaN	62658	24109	176640	1568.71	0.711322	75.464	75.386	2	0.020822	21976	22-Prot-0050_RD5_1_7930	44.57	34.32	1449	226862;226863;226864;226865;226866;226867	yes	no	0	0	0	2	2					By MS/MS	By matching	By matching	By matching	1	0	6
LEISRSVHLTDRQVK	2 Phospho (STY)	32;93	P31260-2;P31260	HOXA10	Homeobox protein Hox-A10	1.02387	159360	155645	169640	123740	150520	168200	104660	114210	197530	197080	1225600	1939.93	0.928191	78.255	78.219	2	0.014185	37698	22-Prot-0050_RD5_1_7930	45.939	12.839	2278	121812;121813;121814;121815;121816;121817;121818;121819	yes	no	0	0	0	2	2	By matching	By matching	By matching	By matching	By MS/MS	By matching	By matching	By matching	1	0	8	1	1
GPKAEVTAPDVEVSLPSMEVDVQAQK	2 Phospho (STY);2 Oxidation (MP)		Q8IVF2;Q8IVF2-3	AHNAK2	Protein AHNAK2	1.02048	215050	210735	NaN	NaN	215050	NaN	NaN	NaN	213940	207530	636520	2915.29	0.291251	83.404	83.341	3	1			NaN	NaN	3357	74794;74795;74796	no	no	0	0	2	2	1					By matching	By matching	By matching		1	0	3
LLMTPRAAPTSAPPSK	Phospho (STY);Oxidation (MP)	101;102	Q13123;E7EQZ7;D6REL4;D6RAY9;D6RCQ4	IK	Protein Red	1.012	600940	593815	NaN	11623	600940	611190	NaN	NaN	596630	591000	2411400	1732.86	0.858307	55.102	55.026	2	0.0015181	27422	22-Prot-0050_RD5_1_7931	119.94	55.67	2840	135661;135662;135663;135664;135665	yes	no	0	0	1	1	1				By matching	By MS/MS	By MS/MS	By MS/MS	By matching	1	0	5
ITPSSKELASQK	Phospho (STY);Oxidation (MP)	64	Q9UBW7;A0A087X151;Q9UBW7-2	ZMYM2	Zinc finger MYM-type protein 2	1.00947	473940	469495	704420	632990	312710	314890	508860	550890	409180	430130	3864100	1383.66	0.664676	74.687	74.65	2	0.011331	11395	22-Prot-0048_RD3_1_7923	65.404	18.055	4210	105443;105444;105445;105446;105447;105448;105449;105450	yes	no	0	0	1	1	1	By matching	By MS/MS	By matching	By matching	By matching	By matching	By matching	By matching	1	0	8	1	1
EVTVSLSGPSPMIEIR	2 Phospho (STY);Oxidation (MP)	56;57	Q96RW7-2;Q96RW7	HMCN1	Hemicentin-1	1.0031	871520	868830	1524000	1181500	540400	561540	1005900	1130100	731760	707150	7382500	1889.82	0.824697	61.107	61.068	2	0.044241	33168	22-Prot-0051_RD6_1_7935	52.662	13.369	3722	48070;48071;48072;48073;48074;48075;48076;48077	yes	no	0	0	1	2	0	By matching	By matching	By matching	By matching	By matching	By matching	By matching	By MS/MS	1	0	8	1	1
PTWLDGKHVVFGK	Phospho (STY)	95	P45877	PPIC	Peptidyl-prolyl cis-trans isomerase C	0.991626	394310	397640	412430	NaN	394310	198180	303800	428710	398010	397270	2532700	1562.76	0.764664	49.438	49.387	3;4	0.015935	15880	22-Prot-0048_RD3_1_7923	50.314	22.725	2403	177842;177843;177844;177845;177846;177847;177848;177849	yes	yes	0	0	0	1	1	By matching	By MS/MS	By matching		By matching	By matching	By matching	By matching	1	0	8	1	2
NMIWRNSISCLR	Acetyl (Protein N-term);Phospho (STY);Deamidation (N)	4	C9J3F1;C9J6U8;C9JE69;B5ME25;E7ETE0;B3KW44;Q9H825	METTL8	Methyltransferase-like protein 8	0.985219	203630	206685	NaN	NaN	197620	209640	NaN	NaN	205730	207640	820630	1671.73	0.726247	70.716	70.636	2	0.03471	24938	22-Prot-0051_RD6_1_7934	47.361	9.2614	596	172178;172179;172180;172181	yes	no	1	1	0	1	1					By matching	By matching	By MS/MS	By matching	1	0	4
EYVLPHFSVSIEPEYNFIGYKNFK	3 Phospho (STY)		P01031	C5	Complement C5;Complement C5 beta chain;Complement C5 alpha chain;C5a anaphylatoxin;Complement C5 alpha' chain	0.983729	254540	258750	NaN	NaN	257650	251430	NaN	NaN	258750	NaN	767820	3159.35	0.347323	107.12	107.03	3	1			NaN	NaN	1864	48561;48562;48563	no	no	0	0	0	3	1					By matching		By matching	By matching	1	0	3
PNQTSKMLVANIDLGPTILDIAGYDLNK	2 Phospho (STY);2 Deamidation (N);Oxidation (MP)		H7C3P4;F6S8M0;P15586-2;P15586	GNS	N-acetylglucosamine-6-sulfatase	0.982891	55640.5	56609	NaN	NaN	64221	47060	NaN	NaN	NaN	56609	167890	3191.47	0.475029	86.916	86.815	3	1			NaN	NaN	1097	177675;177676;177677	no	no	0	2	1	2	1						By matching	By matching	By matching	1	0	3
LLMTPRAAPTSAPPSK	Phospho (STY)	101;102	Q13123;E7EQZ7;D6REL4;D6RAY9;D6RCQ4	IK	Protein Red	0.974227	6981700	7166400	NaN	376970	7029500	6981700	NaN	383510	7333100	7166400	29271000	1716.86	0.863392	55.12	55.055	2	0.0013959	26751	22-Prot-0050_RD5_1_7931	96.946	48.245	2840	135655;135656;135657;135658;135659;135660	yes	no	0	0	0	1	1		By matching		By matching	By MS/MS	By MS/MS	By MS/MS	By MS/MS	1	0	6		1
AIIENLIQKQDFSLSVALDGGSMLVTYPYDK	2 Phospho (STY);Deamidation (N)		O75976;O75976-2;J3QRJ9	CPD	Carboxypeptidase D	0.966692	163980	169630	NaN	NaN	NaN	163980	NaN	NaN	173160	166100	503240	3588.68	0.675186	99.163	99.099	4	1			NaN	NaN	1760	10718;10719;10720	no	no	0	1	0	2	1					By matching	By matching		By matching	1	0	3
GIWKPETPQANLAINPAALLPTAASQISEVK	Phospho (STY);Oxidation (MP)		A0A087WYF6;Q641Q2-2;Q9Y4E1-2;Q9Y4E1-1;Q9Y4E1;Q9Y4E1-5;Q9Y4E1-3;J3KP36	FAM21A;FAM21C	WASH complex subunit FAM21A;WASH complex subunit FAM21C	0.965755	700100	724925	1220800	700100	502700	NaN	896480	864730	585120	9005.4	4779000	3323.72	0.716658	93.335	93.303	4	1			NaN	NaN	86	70096;70097;70098;70099;70100;70101;70102	no	no	0	0	1	1	1	By matching	By matching	By matching	By matching	By matching	By matching	By matching		1	0	7	1	1
LRSYEDMIGEEVPSDQYYWAPLAQHER	Phospho (STY);Oxidation (MP)		O60716-8;O60716-3;O60716-5;O60716-19;O60716-21;O60716-23;O60716-24;O60716-15;O60716-16;O60716-7;O60716-13;O60716-11;O60716;O60716-14;O60716-9;O60716-12;O60716-10;O60716-4;O60716-6;C9JZR2;O60716-2;O60716-17;O60716-22;O60716-20;O60716-18	CTNND1	Catenin delta-1	0.964179	32838	34058	NaN	NaN	34717	30959	NaN	NaN	34058	NaN	99733	3377.47	0.470022	75.551	75.454	4	1			NaN	NaN	1684	143511;143512;143513	yes	no	0	0	1	1	1					By matching		By matching	By matching	1	0	3
VGSAADIPINISETDLSLLTATVVPPSGR	Phospho (STY);Deamidation (N);2 Oxidation (MP)		Q60FE5;P21333-2;P21333;H0Y5F3;H7C2E7	FLNA	Filamin-A	0.953583	97418	102160	NaN	NaN	97418	NaN	NaN	NaN	102160	NaN	199580	3005.48	0.484593	101.71	101.63	3	1			NaN	NaN	3187	241084;241085	yes	no	0	1	2	1	0					By matching		By matching		1	0	2
FTGAPLKVHKISNPWQSPSGTLPALR	Phospho (STY);Deamidation (N);2 Oxidation (MP)		Q13505-3;Q13505;A0A0C4DFQ1;Q13505-2	MTX1	Metaxin-1	0.947641	131334	138590	NaN	180820	NaN	81847	171020	162930	114250	93331	804200	2914.47	0.474243	101.64	101.61	4	1			NaN	NaN	2877	60200;60201;60202;60203;60204;60205	no	no	0	1	2	1	2	By matching	By matching		By matching	By matching	By matching		By matching	1	0	6	1	1
LPPTAPGVGPLLLQLGTEPPAPHPGVSKPWR	Phospho (STY);4 Oxidation (MP)	90	H9KV90;Q9Y566-2;Q9Y566-3;Q9Y566	SHANK1	SH3 and multiple ankyrin repeat domains protein 1	0.94685	3789200	4001900	4375000	4.139e+06	3.4394e+06	2848800	4001900	5168300	3.9754e+06	NaN	27948000	3322.71	0.711513	91.84	91.798	4	0.0098253	49570	22-Prot-0049_RD4_1_7927	44.667	18.377	1341	140624;140625;140626;140627;140628;140629;140630	yes	no	0	0	4	1	1	By matching	By matching	By MS/MS	By MS/MS	By matching		By matching	By matching	1	0	7	1	1
QKIEEAQLANPDIPLGPAENFLMTLASIGGLAAR	Phospho (STY);Deamidation (N);3 Oxidation (MP)		Q9Y613	FHOD1	FH1/FH2 domain-containing protein 1	0.943543	1872650	1984700	1576000	NaN	NaN	2169300	1104300	NaN	2865100	NaN	7714700	3676.81	0.805944	81.637	81.607	4	1			NaN	NaN	4435	181528;181529;181530;181531	no	no	0	1	3	1	1	By matching		By matching		By matching			By matching	1	0	4	1
PKSTGITKISTK	2 Phospho (STY);Oxidation (MP)	16;89	H7C4M0	FILIP1L	Filamin A-interacting protein 1-like	0.92413	2046300	2214300	NaN	NaN	2095000	1.9976e+06	NaN	NaN	2188500	2240100	8521200	1435.67	0.672477	67.128	67.049	2	0.0020726	16321	22-Prot-0050_RD5_1_7931	90.263	58.122	1337	177525;177526;177527;177528	yes	yes	0	0	1	2	2					By MS/MS	By MS/MS	By MS/MS	By MS/MS	1	0	4
NPSGELKTVTLSK	2 Phospho (STY);Oxidation (MP)	60;109;110	Q9H5P4	PDZD7	PDZ domain-containing protein 7	0.906104	124100	136960	124100	212290	8955	NaN	136220	137700	NaN	NaN	619270	1548.68	0.68377	99.822	99.797	2	0.0025958	15464	22-Prot-0048_RD3_1_7923	48.785	9.7466	3963	173001;173002;173003;173004;173005	yes	yes	0	0	1	2	1	By matching	By MS/MS	By matching	By MS/MS			By matching		1	0	5	1	1
QFLILMLSYFELELIEGQAKCPPLDQSR	2 Phospho (STY);Oxidation (MP)	28;117	P22680	CYP7A1	Cholesterol 7-alpha-monooxygenase	0.902178	387490	429505	NaN	NaN	387490	NaN	NaN	NaN	469650	389360	1246500	3513.64	0.636632	114.47	114.41	3	0.0002734	72239	22-Prot-0050_RD5_1_7930	52.773	23.111	2183	179591;179592;179593	yes	yes	0	0	1	2	1					By MS/MS	By MS/MS	By MS/MS		1	0	3
LNVSDENTASCPLSPIK	Phospho (STY);Deamidation (N);Oxidation (MP)	53	Q8N3X6-3	LCORL	Ligand-dependent nuclear receptor corepressor-like protein	0.895651	621944	694405	59089	16277	1184800	1212300	23387	25210	1398900	1363600	5283600	1940.84	0.843839	98.816	98.776	2	0.046876	37740	22-Prot-0050_RD5_1_7930	42.061	13.733	3400	140099;140100;140101;140102;140103;140104;140105;140106	yes	yes	0	1	1	1	0	By matching	By matching	By matching	By matching	By MS/MS	By matching	By matching	By matching	1	0	8	1	1
GGMAINRFRLENDLEELALYQIQLLK	Phospho (STY);Deamidation (N);Oxidation (MP)		Q13057;Q13057-2	COASY	Bifunctional coenzyme A synthase;Phosphopantetheine adenylyltransferase;Dephospho-CoA kinase	0.890963	227650	255510	NaN	227650	NaN	NaN	NaN	255510	NaN	NaN	483160	3143.57	0.572637	104.47	104.46	3	1			NaN	NaN	2834	67263;67264	no	no	0	1	1	1	2		By matching		By matching					1	0	2		1
AESIIIR	Acetyl (Protein N-term);Phospho (STY)		Q8TAT6;Q8TAT6-2;I3L4U9	NPLOC4	Nuclear protein localization protein 4 homolog	0.886448	29825	33645.5	NaN	NaN	NaN	29825	NaN	NaN	31843	35448	97116	922.452	0.452498	64.548	64.491	2	1			NaN	NaN	3463	5478;5479;5480	no	no	1	0	0	1	0					By matching	By matching		By matching	1	0	3
LKVLIPLGPDCTRHTTLGLLNK	Phospho (STY);Deamidation (N);Oxidation (MP)	81;82;83	A0A494C1C1;F6WCI9;B1ANN8;F6U3F6;P50539-4;P50539-2;P50539;P50539-3	MXI1	Max-interacting protein 1	0.884874	1474200	1666000	NaN	737710	1474200	1492900	NaN	NaN	1652500	1679500	7036800	2555.35	0.354645	63.408	63.344	4	0.0083135	42024	22-Prot-0049_RD4_1_7927	48.363	20.086	490	131742;131743;131744;131745;131746	yes	no	0	1	1	1	2				By MS/MS	By matching	By MS/MS	By matching	By MS/MS	1	0	5
VSEAIVSIRR	Phospho (STY)		O15439-2;O15439;A0A2R8YDC1;A0A2R8Y6V8;O15439-4;O15439-3	ABCC4	Multidrug resistance-associated protein 4	0.884198	109950	124350	NaN	NaN	109950	NaN	NaN	NaN	124350	NaN	234300	1208.63	0.627837	45.634	45.512	2	1			NaN	NaN	1596	253228;253229	no	no	0	0	0	1	1					By matching		By matching		1	0	2
TIPNDPGFVVTLSNRMNYFQVAKTVAQR	2 Phospho (STY);Deamidation (N);2 Oxidation (MP)		Q93009-3;Q93009;H3BND8	USP7	Ubiquitin carboxyl-terminal hydrolase 7;Ubiquitin carboxyl-terminal hydrolase	0.875553	12066	13781	NaN	NaN	12066	NaN	NaN	NaN	13781	NaN	25847	3358.55	0.545843	115.16	115.09	4	1			NaN	NaN	3579	220840;220841	no	no	0	1	2	2	2					By matching		By matching		1	0	2
VLSLETYPVSSPKSMSNK	Phospho (STY);Deamidation (N);3 Oxidation (MP)		A0A2R8YDN7;Q9H7F0	ATP13A3	Probable cation-transporting ATPase 13A3	0.865606	124630	143980	NaN	NaN	124010	125250	NaN	NaN	143980	NaN	393240	2094.94	0.943218	82.522	82.429	3	1			NaN	NaN	418	248555;248556;248557	no	no	0	1	3	1	1					By matching		By matching	By matching	1	0	3
TDDYLDQPCLETVNR	Phospho (STY);Oxidation (MP)	92	P31150	GDI1	Rab GDP dissociation inhibitor alpha	0.840843	65360	77731.5	NaN	NaN	65360	NaN	NaN	NaN	81549	73914	220820	1933.78	0.776487	60.534	60.468	2	0.0029532	37470	22-Prot-0050_RD5_1_7930	58.476	37.115	2275	215163;215164;215165	yes	yes	0	0	1	1	0					By MS/MS	By MS/MS	By MS/MS		1	0	3
VTGIPTPVVKFYR	2 Phospho (STY);2 Oxidation (MP)		A0A0A0MRA3;A0A0A0MTS7;Q8WZ42-3;Q8WZ42-10;Q8WZ42-9;Q8WZ42-5;Q8WZ42-11;Q8WZ42-4;Q8WZ42-7;Q8WZ42-2;Q8WZ42;Q8WZ42-8;Q8WZ42-13;Q8WZ42-12;Q8WZ42-6	TTN	Titin	0.833455	57125	68540	87931	57125	40345	NaN	81032	68540	43060	NaN	378030	1667.77	0.772525	71.119	71.094	2	1			NaN	NaN	157	255059;255060;255061;255062;255063;255064	no	no	0	0	2	2	1	By matching	By matching	By matching	By matching	By matching		By matching		1	0	6	1	1
LFLLVQAFGGVDVAEFSSRYGPGQRR	2 Phospho (STY)		Q8N8A6	DDX51	ATP-dependent RNA helicase DDX51	0.820146	58261.5	71038	89198	78758	33054	37765	71707	71038	NaN	39929	421450	3028.44	0.436157	79.963	79.924	4	1			NaN	NaN	3416	123119;123120;123121;123122;123123;123124;123125	no	no	0	0	0	2	2	By matching	By matching	By matching	By matching		By matching	By matching	By matching	1	0	7	1	1
INSQLVAQQVAQQYATPPPPK	2 Phospho (STY);Oxidation (MP)	108;120	Q8N488	RYBP	RING1 and YY1-binding protein	0.803144	848858	1056919	35116	29806	1731500	1662600	24438	22269	2184700	2.0894e+06	7779900	2453.14	0.139306	72.459	72.421	3	0.0063172	53916	22-Prot-0050_RD5_1_7931	46.768	14.967	3403	99933;99934;99935;99936;99937;99938;99939;99940	yes	yes	0	0	1	2	0	By matching	By matching	By matching	By matching	By MS/MS	By MS/MS	By MS/MS	By matching	1	0	8	1	1
IIDINYYPVPEACLSNKRHR	2 Phospho (STY)		P23921;E9PL69	RRM1	Ribonucleoside-diphosphate reductase large subunit	0.802951	36185	45065	NaN	NaN	NaN	36185	NaN	NaN	45065	NaN	81251	2617.19	0.191358	106.97	106.9	3	1			NaN	NaN	2196	92173;92174	no	no	0	0	0	2	2					By matching			By matching	1	0	2
LKLGEIVTTIPTIGFNVETVEYK	Phospho (STY);Oxidation (MP)		P84077;P61204;F5H423;F5H0C7;P84085;C9J1Z8	ARF1;ARF3;ARF5	ADP-ribosylation factor 1;ADP-ribosylation factor 3;ADP-ribosylation factor 5	0.773271	119250	154215	119250	91544	192490	NaN	108220	111160	201730	197270	1021600	2659.38	0.376152	57.303	57.274	4	1			NaN	NaN	2725;2726	131051;131052;131053;131054;131055;131056;131057	no	no	0	0	1	1	1	By matching	By matching	By matching	By matching	By matching	By matching	By matching		1	0	7	1	1
VEATKNETSAPFK	3 Phospho (STY);Deamidation (N);Oxidation (MP)		P07814;V9GYZ6	EPRS	Bifunctional glutamate/proline--tRNA ligase;Glutamate--tRNA ligase;Proline--tRNA ligase	0.771974	33260.5	43085	NaN	NaN	32794	33727	NaN	NaN	43085	NaN	109610	1677.6	0.59773	67.83	67.733	3	1			NaN	NaN	1962	237296;237297;237298	no	no	0	1	1	3	1					By matching		By matching	By matching	1	0	3
FDLGQDVIDFTGHALALYRTDDYLDQPCLETVNR	Phospho (STY);Oxidation (MP)	92	P31150	GDI1	Rab GDP dissociation inhibitor alpha	0.769606	35092.5	45598	NaN	NaN	35743	34442	NaN	NaN	NaN	45598	115780	4065.85	0.845577	106.99	106.91	4	1			NaN	NaN	2275	50250;50251;50252	no	no	0	0	1	1	1						By matching	By matching	By matching	1	0	3
LGYTQTNVGEALAAVHGSEFSQTTICR	Phospho (STY);Deamidation (N)	30;31	P28069;P28069-2	POU1F1	Pituitary-specific positive transcription factor 1	0.767061	133810	174445	NaN	NaN	131300	136320	NaN	NaN	169810	179080	616510	2990.35	0.348116	102.27	102.19	3	0.0018225	63022	22-Prot-0051_RD6_1_7934	52.149	30.325	2231	127131;127132;127133;127134	yes	no	0	1	0	1	0					By matching	By matching	By MS/MS	By MS/MS	1	0	4
LELNGIKSIPPGAFSPYR	Phospho (STY);Oxidation (MP)	19	Q5T0V2;Q5T0V4;Q5T0V0;O75093-2;O75093	SLIT1	Slit homolog 1 protein	0.685175	120878	176420	219100	NaN	22657	NaN	176420	NaN	NaN	NaN	418170	2054.02	0.0237923	70.869	70.829	3	0.0088794	31111	22-Prot-0048_RD3_1_7922	47.57	29.472	1697	121906;121907;121908	yes	no	0	0	1	1	1	By MS/MS		By matching				By matching		1	0	3	1
IGSAELSFEHDAWMSK	Phospho (STY);Oxidation (MP)		Q7Z392-4;Q7Z392-3;Q7Z392	TRAPPC11	Trafficking protein particle complex subunit 11	0.665883	28894	43392	NaN	NaN	NaN	28894	NaN	NaN	43392	NaN	72286	1902.79	0.78593	70.235	70.16	2	1			NaN	NaN	3289	91204;91205	no	no	0	0	1	1	0					By matching			By matching	1	0	2
VLTQLLLNSDHRSTATVQICSGSVNLKGAVK	3 Phospho (STY);Deamidation (N)	47;48;104	Q5SWX8-3;Q5SWX8-4;Q5SWX8	ODR4	Protein odr-4 homolog	0.648262	127685	196965	NaN	NaN	141290	114080	NaN	NaN	196250	197680	649300	3549.67	0.670465	103.31	103.24	4	0.024849	68391	22-Prot-0051_RD6_1_7934	43.727	26.212	3143	248986;248987;248988;248989	yes	no	0	1	0	3	2					By matching	By matching	By MS/MS	By matching	1	0	4
VEVSYMEIYNEKVR	Phospho (STY);Oxidation (MP)	114	E7ERX9;Q9NQT8;A0A1B0GUA8;Q9H1H9-3;Q9H1H9-4;Q9H1H9-2;Q9H1H9	KIF13B;KIF13A	Kinesin-like protein;Kinesin-like protein KIF13B;Kinesin-like protein KIF13A	0.622441	910040	1462050	NaN	NaN	NaN	910040	NaN	NaN	1079900	1844200	3834100	1853.83	0.827066	106.64	106.58	2;3	0.0054192	33918	22-Prot-0050_RD5_1_7930	44.57	9.2404	927;338	237975;237976;237977;237978;237979;237980	no	no	0	0	1	1	1					By MS/MS	By matching		By matching	1	0	6
SFNLPMLMLGGGGYTIR	Phospho (STY);3 Oxidation (MP)		Q13547	HDAC1	Histone deacetylase 1	0.584746	201170	344030	NaN	NaN	242050	160290	NaN	NaN	344030	NaN	746370	1953.87	0.872971	88.869	88.772	2	1			NaN	NaN	2883	194823;194824;194825	yes	yes	0	0	3	1	0					By matching		By matching	By matching	1	0	3
SLWGSRLLLQPSPQR	2 Phospho (STY)		A0A0B4J231	IGLL5	Immunoglobulin lambda-like polypeptide 5	0.577114	110070	190725	NaN	NaN	NaN	110070	NaN	NaN	201580	179870	491520	1896.9	0.901248	78.702	78.647	2	1			NaN	NaN	222	203323;203324;203325	no	no	0	0	0	2	1					By matching	By matching		By matching	1	0	3
FLSEDNSDMIFMLLTK	Phospho (STY);Deamidation (N)		K7EPN4;Q9HCE0-2;Q9HCE0;K7EM87	EPG5	Ectopic P granules protein 5 homolog	0.56092	213290	380250	NaN	NaN	265580	161000	NaN	NaN	380250	NaN	806830	1983.86	0.861069	87.382	87.287	3	1			NaN	NaN	1437	56032;56033;56034	no	no	0	1	0	1	0					By matching		By matching	By matching	1	0	3
WFYIDFGGVKPMGSEPVPKSR	Phospho (STY);3 Oxidation (MP)		Q9UJS0;Q9UJS0-2	SLC25A13	Calcium-binding mitochondrial carrier protein Aralar2	0.522782	37461	71657	37461	19756	75162	NaN	5161.2	NaN	71657	75552	284750	2524.15	0.149797	100.66	100.62	4	1			NaN	NaN	4257	260090;260091;260092;260093;260094;260095	no	no	0	0	3	1	2	By matching		By matching	By matching	By matching	By matching	By matching		1	0	6	1
LIVLVPPSKPTVNIPSSATIGNR	Phospho (STY);3 Oxidation (MP)		Q9Y624;A0A087WY82	F11R	Junctional adhesion molecule A	0.511512	68804	134511	NaN	222570	68804	63712	200300	246660	68722	63203	933970	2500.33	0.330205	94.421	94.369	3	1			NaN	NaN	4438	130126;130127;130128;130129;130130;130131;130132	yes	no	0	0	3	1	1	By matching	By matching		By matching	By matching	By matching	By matching	By matching	1	0	7	1	1
LLMTPRAAPTSAPPSK	Phospho (STY);2 Oxidation (MP)	101;102	Q13123;E7EQZ7;D6REL4;D6RAY9;D6RCQ4	IK	Protein Red	0.510833	366268	717000	13735	5617.5	718800	757400	NaN	NaN	681040	752960	2929500	1748.85	0.853221	55.153	55.099	2	0.0016736	29363	22-Prot-0050_RD5_1_7930	57.003	28.775	2840	135666;135667;135668;135669;135670;135671;135672	yes	no	0	0	2	1	1			By matching	By matching	By MS/MS	By MS/MS	By matching	By matching	1	0	7
WNTDNTLGTEISWENKLAEGLKLTLDTIFVPNTGK	Phospho (STY);Deamidation (N)		Q9Y277;Q9Y277-2;E5RFP6;E5RJN6;E5RHZ6;E5RK27	VDAC3	Voltage-dependent anion-selective channel protein 3	0.470598	33148	70438	30933	35363	127890	7367.2	70438	NaN	NaN	NaN	271990	3998.96	0.955445	111.15	111.11	4	1			NaN	NaN	4338	261372;261373;261374;261375;261376	no	no	0	1	0	1	2	By matching		By matching	By matching			By matching	By matching	1	0	5	1
TLGANAQTLTLLATVCLEDPVTQEKAK	2 Phospho (STY)		Q9UJX3-2;Q9UJX3	ANAPC7	Anaphase-promoting complex subunit 7	0.442032	156845	354828	42820	270870	NaN	NaN	NaN	34665	674990	NaN	1023300	3044.45	0.454234	75.698	75.697	4	1			NaN	NaN	4260	223134;223135;223136;223137	no	no	0	0	0	2	1		By matching	By matching	By matching	By matching				1	0	4		1
TTYQFIASVALHRLLIENIPDSK	Phospho (STY);Oxidation (MP)	34	Q008S8	ECT2L	Epithelial cell-transforming sequence 2 oncogene-like	0.418897	110162	262980	NaN	NaN	129040	91283	NaN	NaN	262980	NaN	483300	2724.39	0.388782	114.16	114.08	3	0.033557	62525	22-Prot-0050_RD5_1_7930	44.16	22.785	2742	231169;231170;231171	yes	yes	0	0	1	1	1					By MS/MS		By matching	By matching	1	0	3
QGDSSLVFGIKPGDPRVLQK	2 Phospho (STY)		Q9H9Y6-4;Q9H9Y6-5;Q9H9Y6-2;Q9H9Y6;Q9H9Y6-3;H7C0D9	POLR1B	DNA-directed RNA polymerase I subunit RPA2;DNA-directed RNA polymerase	0.391816	9359.3	23887	9359.3	NaN	NaN	NaN	NaN	NaN	NaN	23887	33246	2300.1	0.096713	83.726	83.719	2	1			NaN	NaN	4002	179805;179806	no	no	0	0	0	2	2			By matching			By matching			1	0	2
KRLPVTNEMVHNLVAIELAYINTK	2 Phospho (STY);Oxidation (MP)		G8JLD5;O00429-4;O00429-5;O00429-3;O00429-2;O00429;O00429-8;O00429-6	DNM1L	Dynamin-1-like protein	0.356087	9260.4	26006	NaN	NaN	11198	7322.8	NaN	NaN	NaN	26006	44526	2941.45	0.453781	111.16	111.08	4	1			NaN	NaN	1197	114717;114718;114719	no	no	0	0	1	2	2						By matching	By matching	By matching	1	0	3
ILLNSRNYVGI	Phospho (STY);Deamidation (N)	10	F8WCV0	DAW1	Dynein assembly factor with WDR repeat domains 1	0.350591	55011.2	156910	NaN	NaN	105180	4842.4	NaN	NaN	156910	NaN	266940	1341.67	0.669367	82.345	82.252	2	0.047942	13359	22-Prot-0051_RD6_1_7934	62.969	37.715	1145	96793;96794;96795	yes	yes	0	1	0	1	1					By matching		By MS/MS	By matching	1	0	3
VLPDVLQVSAAPPGPRGRQAPTSPPR	Phospho (STY);3 Oxidation (MP)	54	Q969P0-3;Q969P0;C9J8Z4	IGSF8	Immunoglobulin superfamily member 8	0.293443	39662	135161	NaN	245700	39662	39352	239340	229610	40712	38117	872490	2790.42	0.417791	101.93	101.89	4	0.047458	46133	22-Prot-0048_RD3_1_7922	43.904	14.949	3586	247747;247748;247749;247750;247751;247752;247753	yes	no	0	0	3	1	2	By MS/MS	By matching		By matching	By matching	By matching	By matching	By matching	1	0	7	1	1
MATPGNLGSSVLASKTK	2 Phospho (STY)		P48426	PIP4K2A	Phosphatidylinositol 5-phosphate 4-kinase type-2 alpha	0.287043	141030	491320	NaN	833460	133360	141030	876440	885490	106190	106200	3082200	1820.81	0.814467	107.32	107.27	2	1			NaN	NaN	2431	153466;153467;153468;153469;153470;153471;153472	no	no	0	0	0	2	1	By matching	By matching		By matching	By matching	By matching	By matching	By matching	1	0	7	1	1
YIAICFPLHYPIR	Phospho (STY);2 Oxidation (MP)	121	Q8NG85	OR2L3	Olfactory receptor 2L3	0.229449	29085	126760	NaN	29085	NaN	NaN	143560	26416	NaN	126760	325820	1773.83	0.831364	58.704	58.697	2;3	0.0088865	22567	22-Prot-0048_RD3_1_7922	48.157	19.83	3457	265233;265234;265235;265236;265237	yes	yes	0	0	2	1	0	By MS/MS	By matching		By matching		By matching			1	0	5	2	1
KFESEILEAISQNSVVIIRGATGCGK	2 Phospho (STY);Deamidation (N)		Q08211	DHX9	ATP-dependent RNA helicase A	0.224807	261950	1165220	1.9544e+06	NaN	261950	256350	2396600	2182500	147940	144310	7344000	2966.39	0.386155	105.85	105.81	3	1			NaN	NaN	2794	109932;109933;109934;109935;109936;109937;109938	no	no	0	1	0	2	2	By matching	By matching	By matching		By matching	By matching	By matching	By matching	1	0	7	1	1
LIPVITSNCTSKSVAVR	Phospho (STY);Deamidation (N);Oxidation (MP)		Q7Z460;F8WA11;Q7Z460-2;Q7Z460-4;Q7Z460-5;Q7Z460-3;H0Y5T1	CLASP1	CLIP-associating protein 1	0.143651	18656	129870	NaN	217080	18656	12074	129870	149710	18186	NaN	545570	1940.96	0.964229	91.096	91.045	3	1			NaN	NaN	3297	129465;129466;129467;129468;129469;129470	no	no	0	1	1	1	1	By matching	By matching		By matching	By matching		By matching	By matching	1	0	6	1	1
IRTLANLSLELKSVK	2 Phospho (STY);Deamidation (N)		Q96RW7-2;Q96RW7	HMCN1	Hemicentin-1	0.110929	32465	292664	32465	NaN	500920	2021.9	NaN	22879	NaN	562450	1120700	1844.94	0.941382	63.96	63.906	2	1			NaN	NaN	3722	102281;102282;102283;102284;102285	no	no	0	1	0	2	2		By matching	By matching			By matching	By matching	By matching	1	0	5		1
SSHREAMSLKGHLQSVTAPMGITMK	Phospho (STY);2 Oxidation (MP)	85	E9PIP6;Q7Z3Z3	PIWIL3	Piwi-like protein;Piwi-like protein 3	0.082027	19570	238580	NaN	19570	NaN	NaN	NaN	238580	NaN	NaN	258150	2808.31	0.312205	72.865	72.862	4	0.022296	46171	22-Prot-0048_RD3_1_7923	41.584	20.97	996	207691;207692	yes	no	0	0	2	1	2		By MS/MS		By matching					1	0	2		1
FPLLYELTAVSPSPFPQR	Phospho (STY);2 Oxidation (MP)	61	Q9NPA1-3	KCMB3	Isoform 3 of Calcium-activated potassium channel subunit beta-3	0.0759618	8671.8	114160	8671.8	628.55	84786	NaN	114160	156830	NaN	88222	453290	2173.05	0.0496727	81.724	81.699	3	0.022725	34311	22-Prot-0048_RD3_1_7922	50.116	25.952	4034	57565;57566;57567;57568;57569;57570	yes	yes	0	0	2	1	0	By MS/MS	By matching	By matching	By matching		By matching	By matching		1	0	6	1	1
VELSTVNVRTTK	3 Phospho (STY)		Q92665	MRPS31	28S ribosomal protein S31, mitochondrial	0.0587686	5617.1	95580	NaN	NaN	NaN	5617.1	NaN	NaN	95580	NaN	101200	1585.66	0.65552	40.262	40.154	2	1			NaN	NaN	3548	237566;237567	no	no	0	0	0	3	1					By matching			By matching	1	0	2
GNPSSSCPAEGPPAASKTK	Phospho (STY);2 Oxidation (MP)	44;103	Q569H4	PRR16	Protein Largen	0.0320674	67213	2.09599e+06	67213	54029	4071300	NaN	80065	80979	4.111e+06	8440300	16905000	1953.81	0.813935	108.6	108.56	2	0.00054829	36506	22-Prot-0051_RD6_1_7934	56.938	13.325	3108	74316;74317;74318;74319;74320;74321;74322;74323;74324	yes	yes	0	0	2	1	1	By matching	By matching	By matching	By matching	By MS/MS	By matching	By MS/MS		1	0	9	1	1
DPANPSPVMPGIATSER	2 Phospho (STY);Deamidation (N)	50;51;106	Q70EL1-9;Q70EL1-10;Q70EL1-8;Q70EL1-7;Q70EL1	USP54	Inactive ubiquitin carboxyl-terminal hydrolase 54	0.0263121	5857.9	222631	5290.9	5857.9	411370	NaN	NaN	5252.5	440010	NaN	867780	1898.75	0.75226	103.42	103.39	2	1			NaN	NaN	3261	35003;35004;35005;35006;35007	yes	no	0	1	0	2	0		By matching	By matching	By matching	By matching		By matching		1	0	5		1
LSLAQTGLTPRGMR	Phospho (STY);2 Oxidation (MP)	49;105	Q6F5E8-2;Q6F5E8	RLTPR	Leucine-rich repeat-containing protein 16C	0.00990402	4132.8	417285	4132.8	NaN	NaN	NaN	428660	405910	NaN	NaN	838700	1611.78	0.780391	93.194	93.204	2	0.015707	17717	22-Prot-0048_RD3_1_7922	51.531	31.974	3199	144963;144964;144965	yes	no	0	0	2	1	1	By MS/MS	By matching	By matching						1	0	3	1	1
HTGPGILSMANAGPNTNGSQFFICTAKTEWLDGK	Phospho (STY);2 Deamidation (N);Oxidation (MP)	98	P62937;P62937-2	PPIA	Peptidyl-prolyl cis-trans isomerase A;Peptidyl-prolyl cis-trans isomerase A, N-terminally processed	0.00183273	702.76	383450	NaN	NaN	NaN	702.76	NaN	NaN	487940	278960	767600	3717.65	0.648063	79.497	79.443	4	0.0014831	73637	22-Prot-0050_RD5_1_7930	52.794	40.137	2668	84745;84746;84747	yes	no	0	2	1	1	1					By MS/MS	By matching		By matching	1	0	3
LLSQLERGILVASNPR	2 Phospho (STY);Deamidation (N);Oxidation (MP)	14;15	H0YMB0;Q00978	IRF9	Interferon regulatory factor 9	0.00157086	1594.4	1014985	NaN	NaN	1594.4	NaN	368670	104160	2.0813e+06	1661300	4217000	1941.93	0.932608	40.004	39.954	3	0.009975	37819	22-Prot-0050_RD5_1_7930	55.754	6.6576	1262	137075;137076;137077;137078;137079	yes	no	0	1	1	2	1	By matching	By matching			By MS/MS	By matching	By matching		1	0	5	1	1
AAAAAAAGDSDSWDADAFSVEDPVRK	Acetyl (Protein N-term);Phospho (STY)		O75822-3;O75822;O75822-2	EIF3J	Eukaryotic translation initiation factor 3 subunit J	#VALUE!	1511.5	nd	NaN	NaN	NaN	1511.5	NaN	NaN	NaN	NaN	1511.5	2714.15	0.149734	90.179	90.052	3	1			NaN	NaN	1747	40	yes	no	1	0	0	1	1								By matching	1	0	1
NCASPSSAGQLILPECMK	2 Phospho (STY);Deamidation (N);Oxidation (MP)		G5EA31;P53992;P53992-2	SEC24C	Protein transport protein Sec24C	#VALUE!	2107.2	nd	NaN	NaN	2107.2	NaN	NaN	NaN	NaN	NaN	2107.2	2138.81	0.812494	78.917	78.779	2	1			NaN	NaN	1193	165610	no	no	0	1	1	2	0							By matching		1	0	1
LYSQLERNRLLSNELK	Phospho (STY);2 Deamidation (N)		P06753-3;P06753-4	TPM3	Tropomyosin alpha-3 chain	#VALUE!	7690.4	nd	NaN	NaN	NaN	7690.4	NaN	NaN	NaN	NaN	7690.4	2057.02	0.0194352	114.91	114.82	2	1			NaN	NaN	1947	152381	no	no	0	2	0	1	2								By matching	1	0	1
TASIKPEVALLDTQDMENMSDDDGWEFVNLGDQQSFGIK	Phospho (STY)		O00410;O00410-3;H0Y8C6;O00410-2	IPO5	Importin-5	#VALUE!	7945.25	nd	NaN	4895.5	NaN	10995	NaN	NaN	NaN	NaN	15890	4422.95	0.954929	104.87	104.81	4	1			NaN	NaN	1506	214606;214607	yes	no	0	0	0	1	1				By matching				By matching	1	0	2
ADELSEKQVYDAHTK	Acetyl (Protein N-term);Phospho (STY)		Q03135-2;C9JKI3	CAV1	Caveolin-1;Caveolin	#VALUE!	8370.9	nd	NaN	NaN	8370.9	NaN	NaN	NaN	NaN	NaN	8370.9	1854.8	0.803688	43.294	43.117	3	1			NaN	NaN	2764	3537	yes	no	1	0	0	1	1							By matching		1	0	1
IIIIEFNPMYPK	Phospho (STY);Deamidation (N)		H0YAX8;E7ESG9;G3V124;A0A087WTU6;Q9NRS4-4;Q9NRS4-2;Q9NRS4-3;Q9NRS4	TMPRSS4	Transmembrane protease serine 4	#VALUE!	10038	nd	NaN	NaN	NaN	10038	NaN	NaN	NaN	NaN	10038	1557.76	0.755405	88.816	88.692	3	1			NaN	NaN	34	92755	no	no	0	1	0	1	0								By matching	1	0	1
SLAALDALNTDDENDEEEYEAWKVR	Phospho (STY)		P55081	MFAP1	Microfibrillar-associated protein 1	#VALUE!	12122	nd	NaN	NaN	12122	NaN	NaN	NaN	NaN	NaN	12122	2975.27	0.270971	87.184	87.043	3	1			NaN	NaN	2564	199596	yes	yes	0	0	0	1	1							By matching		1	0	1
GHYEVTGSDDETGKLQGSGVSLASKK	Phospho (STY)		Q09666	AHNAK	Neuroblast differentiation-associated protein AHNAK	#VALUE!	13237	nd	NaN	13237	NaN	NaN	NaN	NaN	NaN	NaN	13237	2729.25	0.254533	40.977	40.984	4	1			NaN	NaN	2805	68089	yes	yes	0	0	0	1	2				By matching					1	0	1
MADLEEQLSDEEKVR	Acetyl (Protein N-term);Phospho (STY);Oxidation (MP)		P47755;C9JUG7;F8W9N7;P47755-2	CAPZA2	F-actin-capping protein subunit alpha-2	#VALUE!	14268	nd	NaN	NaN	NaN	14268	NaN	NaN	NaN	NaN	14268	1928.81	0.807453	59.225	59.091	3	1			NaN	NaN	2424	152685	no	no	1	0	1	1	1								By matching	1	0	1
SGEDEQQEQTIAEDLVVTKYK	Acetyl (Protein N-term);Phospho (STY)	65	Q9UQ80;F8VR77	PA2G4	Proliferation-associated protein 2G4	#VALUE!	14500	nd	19785	NaN	14500	9823.8	NaN	NaN	NaN	NaN	44109	2531.13	0.131624	86.285	86.203	3	1			NaN	NaN	4325	195467;195468;195469	yes	no	1	0	0	1	1			By matching				By matching	By matching	1	0	3
NINPLTAMSYLR	3 Phospho (STY);Deamidation (N)		G5E9V4;Q969F9-2;Q969F9;H7C5G2	HPS3	Hermansky-Pudlak syndrome 3 protein	#VALUE!	16460	nd	NaN	NaN	NaN	16460	NaN	NaN	NaN	NaN	16460	1632.61	0.606127	53.843	53.691	2	1			NaN	NaN	1187	168488	no	no	0	1	0	3	0								By matching	1	0	1
VVDYSQFQESDDADEDYGRDSGPPTKK	Phospho (STY)		Q9H1E3	NUCKS1	Nuclear ubiquitous casein and cyclin-dependent kinase substrate 1	#VALUE!	17509	nd	NaN	16562	17509	19480	NaN	NaN	NaN	NaN	53551	3127.29	0.293163	47.722	47.611	4	1			NaN	NaN	3921	256678;256679;256680	yes	yes	0	0	0	1	2				By matching			By matching	By matching	1	0	3
FVEWLKNAEEESESEAEEGD	2 Phospho (STY)		Q7L1Q6;Q7L1Q6-4;Q7L1Q6-3;Q7L1Q6-2;H0Y503	BZW1	Basic leucine zipper and W2 domain-containing protein 1	#VALUE!	17718.5	nd	10331	NaN	25106	NaN	NaN	NaN	NaN	NaN	35437	2485.91	0.908757	88.322	88.257	2	1			NaN	NaN	3272	60865;60866	yes	no	0	0	0	2	1			By matching				By matching		1	0	2
GLKEGMNPSYDEYADSDEDQHDAYLER	Phospho (STY)	35	Q08945	SSRP1	FACT complex subunit SSRP1	#VALUE!	17882	nd	22729	13645	17882	NaN	NaN	NaN	NaN	NaN	54255	3226.27	0.271047	56.203	56.157	4	0.00077293	61334	22-Prot-0049_RD4_1_7926	54.143	51.514	2800	72003;72004;72005	yes	yes	0	0	0	1	1			By MS/MS	By MS/MS			By MS/MS		1	0	3
ASLGSLEGEAEAEASSPK	Phospho (STY)	36	Q09666	AHNAK	Neuroblast differentiation-associated protein AHNAK	#VALUE!	20553	nd	25129	12115	23720	17386	NaN	NaN	NaN	NaN	78350	1811.78	0.782619	79.137	79.075	2	0.012122	30070	22-Prot-0051_RD6_1_7935	76.494	48.231	2805	22482;22483;22484;22485	yes	yes	0	0	0	1	0			By matching	By matching			By matching	By MS/MS	1	0	4
SGDEMIFDPTMSKK	Acetyl (Protein N-term);Phospho (STY)	27	P20042	EIF2S2	Eukaryotic translation initiation factor 2 subunit 2	#VALUE!	31403	nd	26857	NaN	NaN	35949	NaN	NaN	NaN	NaN	62805	1706.69	0.693275	77.597	77.543	2	1			NaN	NaN	2147	195360;195361	yes	yes	1	0	0	1	1			By matching					By matching	1	0	2
SSSVGSSSSYPISPAVSR	Phospho (STY)	12;13	H0YDN1;Q15149;Q15149-7;Q15149-9;Q15149-5;Q15149-6;Q15149-3;Q15149-2;Q15149-4;Q15149-8	PLEC	Plectin	#VALUE!	33901	nd	40342	NaN	33901	27624	NaN	NaN	NaN	NaN	101870	1833.81	0.814587	51.093	50.993	2	0.0029656	31516	22-Prot-0051_RD6_1_7934	73.345	60.73	2990;2991;2992;1231	208485;208486;208487	no	no	0	0	0	1	0			By matching				By MS/MS	By matching	1	0	3
SGDEMIFDPTMSK	Acetyl (Protein N-term);Phospho (STY)	27	P20042	EIF2S2	Eukaryotic translation initiation factor 2 subunit 2	#VALUE!	35889	nd	22864	40919	NaN	35889	NaN	NaN	NaN	NaN	99672	1578.6	0.598312	94.697	94.651	2	0.0018063	16244	22-Prot-0049_RD4_1_7927	52.201	50.1	2147	195351;195352;195353	yes	yes	1	0	0	1	0			By matching	By MS/MS				By matching	1	0	3
PSVAPRHPSTNSLLR	2 Phospho (STY);3 Oxidation (MP)		Q9P032	NDUFAF4	NADH dehydrogenase [ubiquinone] 1 alpha subcomplex assembly factor 4	#VALUE!	36206	nd	NaN	36206	NaN	NaN	NaN	NaN	NaN	NaN	36206	1838.81	0.807742	71.697	71.695	2	1			NaN	NaN	4167	177815	no	no	0	0	3	2	1				By matching					1	0	1
SGEDEQQEQTIAEDLVVTK	Acetyl (Protein N-term);Phospho (STY)	65	Q9UQ80;F8VR77	PA2G4	Proliferation-associated protein 2G4	#VALUE!	36814	nd	36814	20282	NaN	42918	NaN	NaN	NaN	NaN	100010	2239.97	0.973332	92.863	92.817	2	4.6128e-05	45867	22-Prot-0051_RD6_1_7935	51.333	43.685	4325	195454;195455;195456	yes	no	1	0	0	1	0			By matching	By matching				By MS/MS	1	0	3
SNSFSDEREFSGPSTPTGTLEFEGGEVSLEGGKVK	Phospho (STY)		Q09666	AHNAK	Neuroblast differentiation-associated protein AHNAK	#VALUE!	37569	nd	NaN	24215	47786	37569	NaN	NaN	NaN	NaN	109570	3740.67	0.673075	78.964	78.875	4	1			NaN	NaN	2805	204926;204927;204928	yes	yes	0	0	0	1	2				By matching			By matching	By matching	1	0	3
ASGVTVNDEVIKVFNDMK	Acetyl (Protein N-term);Phospho (STY)	67	Q9Y281;F8WDN3;G3V2U0	CFL2	Cofilin-2	#VALUE!	39993.5	nd	37608	21177	42379	53538	NaN	NaN	NaN	NaN	154700	2086.96	0.964622	105.94	105.87	2	0.011448	41707	22-Prot-0051_RD6_1_7934	49.967	43.713	4339	22204;22205;22206;22207	yes	no	1	0	0	1	1			By matching	By matching			By MS/MS	By matching	1	0	4
LVSFHDDSDEDLLHI	Phospho (STY)	25	P11717	IGF2R	Cation-independent mannose-6-phosphate receptor	#VALUE!	48301	nd	52834	43768	54269	22086	NaN	NaN	NaN	NaN	172960	1833.78	0.782225	85.93	85.866	3	0.049746	24304	22-Prot-0049_RD4_1_7927	42.941	40.462	2042	150586;150587;150588;150589	yes	yes	0	0	0	1	0			By matching	By MS/MS			By matching	By matching	1	0	4
EFITGDVEPTDAESEWHSENEEEEKLAGDMK	Phospho (STY)	58;59	Q99733;Q99733-2;C9JZI7;C9J6D1;E9PNJ7;A8MXH2;E9PKT8	NAP1L4	Nucleosome assembly protein 1-like 4	#VALUE!	56938	nd	58240	30433	91456	55636	NaN	NaN	NaN	NaN	235760	3630.49	0.486913	82.338	82.276	4	1.0762e-05	68939	22-Prot-0051_RD6_1_7934	78.359	58.329	3762	39312;39313;39314;39315	yes	no	0	0	0	1	1			By matching	By matching			By MS/MS	By MS/MS	1	0	4
STAQQELDGKPASPTPVIVASHTANKEEK	Phospho (STY)	33;94	P35606-2;P35606;H0YAC7	COPB2	Coatomer subunit beta'	#VALUE!	61267.5	nd	72034	50501	41389	103210	NaN	NaN	NaN	NaN	267140	3112.51	0.507788	40.489	40.414	4	0.00031884	48207	22-Prot-0049_RD4_1_7927	48.801	43.224	2323	208948;208949;208950;208951	yes	no	0	0	0	1	2			By MS/MS	By MS/MS			By matching	By MS/MS	1	0	4
AALGLQDSDDEDAAVDIDEQIESMFNSK	Phospho (STY)	1	A0A0C4DG89;Q7L014	DDX46	Probable ATP-dependent RNA helicase DDX46	#VALUE!	69731	nd	NaN	42665	78371	69731	NaN	NaN	NaN	NaN	190770	3105.3	0.300951	110.56	110.48	3	3.5884e-05	48134	22-Prot-0049_RD4_1_7927	81.031	79.393	244;3271	1752;1753;1754	no	no	0	0	0	1	0				By MS/MS			By MS/MS	By matching	1	0	3
SIHFSSPVFTSR	Acetyl (Protein N-term);Phospho (STY)	5	CON__Q3KNV1;P08729;CON__P08729	KRT7	Keratin, type II cytoskeletal 7	#VALUE!	70922	nd	99148	70922	24558	NaN	NaN	NaN	NaN	NaN	194630	1485.67	0.665344	79.53	79.507	2	0.0039402	16885	22-Prot-0049_RD4_1_7926	43.518	28.569	810	197661;197662;197663;197664;197665	yes	no	1	0	0	1	0			By MS/MS	By matching			By matching		1	0	5
ASGVAVSDGVIKVFNDMKVR	Acetyl (Protein N-term);Phospho (STY)	29	P23528;E9PP50;E9PS23	CFL1	Cofilin-1	#VALUE!	87407	nd	90689	NaN	87407	81492	NaN	NaN	NaN	NaN	259590	2213.09	0.0915543	100.74	100.66	3	1.9944e-05	43473	22-Prot-0049_RD4_1_7926	51.397	44.897	2193	22168;22169;22170	yes	no	1	0	0	1	2			By MS/MS				By MS/MS	By MS/MS	1	0	3
NSATFKSFEDRVGTIK	Phospho (STY)	18	O43399;O43399-5;O43399-7;O43399-2;O43399-4;O43399-3;O43399-6	TPD52L2	Tumor protein D54	#VALUE!	93881	nd	70842	56721	122700	116920	NaN	NaN	NaN	NaN	367190	1878.89	0.887693	61.748	61.685	3	0.038358	33356	22-Prot-0051_RD6_1_7934	78.925	70.513	1621	173867;173868;173869;173870	yes	no	0	0	0	1	2			By matching	By matching			By MS/MS	By matching	1	0	4
AASAAAASAAAASAASGSPGPGEGSAGGEKR	Acetyl (Protein N-term);Phospho (STY)	38;39;40	Q13263;Q13263-2	TRIM28	Transcription intermediary factor 1-beta	#VALUE!	114855	nd	116000	87024	113710	121110	NaN	NaN	NaN	NaN	437850	2664.18	0.17768	59.844	59.781	3	1.984e-08	54303	22-Prot-0049_RD4_1_7926	89.684	71.323	2859	2397;2398;2399;2400	yes	no	1	0	0	1	1			By MS/MS	By MS/MS			By MS/MS	By MS/MS	1	0	4
KEESEESDDDMGFGLFD	2 Phospho (STY)	20;21	P05387;H0YDD8;P05386-2;P05386	RPLP2;RPLP1	60S acidic ribosomal protein P2;60S acidic ribosomal protein P1	#VALUE!	121100	nd	121100	95281	NaN	152270	NaN	NaN	NaN	NaN	368650	2108.68	0.684694	106.59	106.55	2	0.00010535	32580	22-Prot-0049_RD4_1_7927	71.471	65.568	1928;1927	109625;109626;109627	no	no	0	0	0	2	1			By MS/MS	By MS/MS				By MS/MS	1	0	3
MEDLDQSPLVSSSDSPPRPQPAFK	Acetyl (Protein N-term);Phospho (STY)	62;63	Q9NQC3-2;Q9NQC3;Q9NQC3-4;Q9NQC3-5	RTN4	Reticulon-4	#VALUE!	174170	nd	NaN	NaN	174170	NaN	NaN	NaN	NaN	NaN	174170	2749.23	0.230627	87.816	87.674	3	1.017e-18	59521	22-Prot-0051_RD6_1_7934	77.347	69.598	4047;4048	154704	no	no	1	0	0	1	1							By MS/MS		1	0	1
SLYASSPGGVYATR	Phospho (STY)	23;24	P08670;B0YJC4;A0A1B0GTT5;A0A1B0GVG8	VIM	Vimentin	#VALUE!	177600	nd	238210	188810	166390	163150	NaN	NaN	NaN	NaN	756560	1507.67	0.670824	52.293	52.218	2	0.0045226	18756	22-Prot-0051_RD6_1_7934	112.68	94.152	1983	203380;203381;203382;203383	yes	no	0	0	0	1	0			By MS/MS	By matching			By MS/MS	By matching	1	0	4
ASGVAVSDGVIK	Acetyl (Protein N-term);Phospho (STY)	29	P23528;E9PP50;E9PS23	CFL1	Cofilin-1	#VALUE!	189575	nd	161530	165030	214120	220570	NaN	NaN	NaN	NaN	761250	1223.58	0.579883	67.605	67.543	2	0.0013832	10122	22-Prot-0051_RD6_1_7935	65.173	57.208	2193	22106;22107;22108;22109	yes	no	1	0	0	1	0			By matching	By matching			By matching	By MS/MS	1	0	4
LTTPTYGDLNHLVSATMSGVTTSLRFPGQLNADLRK	Phospho (STY);Deamidation (N);Oxidation (MP)		Q9BUF5;K7ESM5	TUBB6	Tubulin beta-6 chain	#VALUE!	249790	nd	NaN	NaN	249790	NaN	NaN	NaN	NaN	NaN	249790	3970.95	0.949982	105.96	105.84	4	1			NaN	NaN	3830	148035	yes	no	0	1	1	1	2							By matching		1	0	1
ASGVAVSDGVIKVFNDMK	Acetyl (Protein N-term);Phospho (STY)	29	P23528;E9PP50;E9PS23	CFL1	Cofilin-1	#VALUE!	334940	nd	245090	236410	424790	449520	NaN	NaN	NaN	NaN	1355800	1957.92	0.922029	103.69	103.63	2	2.84e-57	35829	22-Prot-0051_RD6_1_7935	158.27	135.48	2193	22151;22152;22153;22154	yes	no	1	0	0	1	1			By MS/MS	By MS/MS			By MS/MS	By MS/MS	1	0	4
IMQLSERYNGFVLPCLGVHPVQGLPPEDQR	Phospho (STY);4 Oxidation (MP)	8	E9PQP8;H0YCC7;E9PRA1;E9PP81;Q17R31-5;Q17R31-4;Q17R31-2;Q17R31;Q17R31-3	TATDN3	Putative deoxyribonuclease TATDN3	#VALUE!	465308	nd	917290	13327	NaN	NaN	NaN	NaN	NaN	NaN	930610	3592.68	0.684389	94.233	94.228	4	0.0050226	63723	22-Prot-0049_RD4_1_7926	41.261	18.507	1028	98875;98876	yes	no	0	0	4	1	1			By MS/MS	By matching					1	0	2
ILSNSSLAPSKLRR	2 Phospho (STY);Oxidation (MP)	41;42	Q49AG3	ZBED5	Zinc finger BED domain-containing protein 5	#VALUE!	476220	nd	476220	NaN	NaN	NaN	NaN	NaN	NaN	NaN	476220	1716.83	0.8325	55.095	55.117	2	0.0083039	25237	22-Prot-0049_RD4_1_7926	51.531	24.153	3087	97574	yes	yes	0	0	1	2	2			By MS/MS						1	0	1
PGSCPIILIRCAMLNPPNRCLK	Phospho (STY);Deamidation (N);2 Oxidation (MP)	26	P19957	PI3	Elafin	#VALUE!	576860	nd	NaN	NaN	NaN	576860	NaN	NaN	NaN	NaN	576860	2692.27	0.272254	90.653	90.525	3	0.043834	56755	22-Prot-0051_RD6_1_7935	46.768	34.111	2145	177487	yes	yes	0	1	2	1	2								By MS/MS	1	0	1
IRNISNTVMKVK	Phospho (STY);Deamidation (N)	100	Q0VDF9;H7C2A1;B0YIZ1	HSPA14	Heat shock 70 kDa protein 14	#VALUE!	584080	nd	653480	514680	NaN	NaN	NaN	NaN	NaN	NaN	1168200	1482.76	0.76295	67.042	67.053	2	0.045935	16810	22-Prot-0049_RD4_1_7926	47.561	15.013	2807	102190;102191	yes	no	0	1	0	1	2			By MS/MS	By MS/MS					1	0	2
NLQIAKNSYNDALLTFVWK	Phospho (STY);2 Deamidation (N)	76	A0A0A0MSV2;Q7Z2W7-4;Q7Z2W7	TRPM8	Transient receptor potential cation channel subfamily M member 8	#VALUE!	2868550	nd	3.1741e+06	2563000	NaN	NaN	NaN	NaN	NaN	NaN	5737100	2319.12	0.118815	66.44	66.452	3	0.00084723	37810	22-Prot-0049_RD4_1_7927	54.199	39.791	193	171272;171273	yes	no	0	2	0	1	1			By MS/MS	By MS/MS					1	0	2
VGLSTFKETENTAYK	Phospho (STY);Deamidation (N)	119	Q5JSH3-2;Q5JSH3	WDR44	WD repeat-containing protein 44	#VALUE!	5879350	nd	6449000	5309700	NaN	NaN	NaN	NaN	NaN	NaN	11759000	1767.8	0.796812	71.923	71.932	2	0.0062588	27249	22-Prot-0049_RD4_1_7926	48.701	24.012	3124	240687;240688	yes	no	0	1	0	1	1			By MS/MS	By matching					1	0	2
YVIIPTTFEPGHTGEFLLRVFTDVPSNCR	2 Phospho (STY)	78;79	A0A3B3IRX8;E7EV01;O15484	CAPN5	Calpain-5	#VALUE!	nd	1778450	NaN	NaN	NaN	NaN	NaN	NaN	1943700	1613200	3556900	3524.62	0.624094	76.378	76.358	4	1.4176e-05	72314	22-Prot-0050_RD5_1_7930	80.026	62.511	439	270170;270171	yes	no	0	0	0	2	1					By MS/MS	By MS/MS			1	0	2
VDLKPLLSSLSANK	2 Phospho (STY);Oxidation (MP)	2;3	B0QYZ7;B1AKL4;Q9NRA8-2;Q9NRA8;Q9NRA8-3	EIF4ENIF1	Eukaryotic translation initiation factor 4E transporter	#VALUE!	nd	13974	NaN	NaN	NaN	NaN	NaN	NaN	NaN	13974	13974	1659.79	0.788569	85.903	85.864	2	1			NaN	NaN	566	236863	yes	no	0	0	1	2	1						By matching			1	0	1
AQKLPDLSPVENKEHK	Phospho (STY);2 Oxidation (MP)	7	E7EPN9;Q9Y520-3;Q9Y520-6;Q9Y520-4;Q9Y520-5;Q9Y520;Q9Y520-7;A0A2R8Y7F4;A0A2R8YET2;H7C5N8;Q9Y520-2	PRRC2C	Protein PRRC2C	#VALUE!	nd	102770	NaN	NaN	NaN	NaN	NaN	NaN	102770	NaN	102770	1943.94	0.935371	51.669	51.612	2	0.043339	37909	22-Prot-0050_RD5_1_7930	43.306	11.255	917	20582	yes	no	0	0	2	1	2					By MS/MS				1	0	1
AGKMLMTLPLLRQTSTK	2 Phospho (STY);Oxidation (MP)	96;97	P62508-4;P62508-2;P62508-3;P62508;P62508-5	ESRRG	Estrogen-related receptor gamma	#VALUE!	nd	791920	NaN	NaN	NaN	NaN	NaN	791920	NaN	NaN	791920	2063.99	0.991385	69.361	69.355	2	0.017516	30951	22-Prot-0048_RD3_1_7923	46.068	23.112	2651	8029	yes	no	0	0	1	2	2		By MS/MS							1	0	1		1
VLRSHPFPRQDR	Acetyl (Protein N-term);Phospho (STY);2 Oxidation (MP)	55	Q96G42	KLHDC7B	Kelch domain-containing protein 7B	#VALUE!	nd	227210	NaN	NaN	NaN	NaN	NaN	NaN	227210	NaN	227210	1660.78	0.783502	107.74	107.7	2	0.015184	25642	22-Prot-0050_RD5_1_7930	53.517	24.2	3649	248322	yes	yes	1	0	2	1	2					By MS/MS				1	0	1
AAQPKSLSPPQSQSK	Phospho (STY);2 Oxidation (MP)	66	Q9UQB8;Q9UQB8-2;Q9UQB8-6;Q9UQB8-4;Q9UQB8-5;Q9UQB8-3;I3L4C2;B4DWA1;I3L0Y9	BAIAP2	Brain-specific angiogenesis inhibitor 1-associated protein 2	#VALUE!	nd	1605800	NaN	NaN	NaN	NaN	NaN	NaN	1605800	NaN	1605800	1664.78	0.77708	57.065	57.029	2	0.021142	25819	22-Prot-0050_RD5_1_7930	48.363	25.465	4326	2349	yes	no	0	0	2	1	1					By MS/MS				1	0	1
AYNLNRTPSTVTLNNNSAPANR	Phospho (STY);2 Deamidation (N);2 Oxidation (MP)		Q9ULH0-4;Q9ULH0;Q9ULH0-2;Q9ULH0-5	KIDINS220	Kinase D-interacting substrate of 220 kDa	#VALUE!	nd	21798	NaN	NaN	NaN	NaN	NaN	NaN	21798	NaN	21798	2501.12	0.118374	84.028	84.009	3	1			NaN	NaN	4289	28416	no	no	0	2	2	1	1					By matching				1	0	1
EIVKLVSVLSTIINSTKK	3 Phospho (STY);Deamidation (N)		Q8TE73	DNAH5	Dynein heavy chain 5, axonemal	#VALUE!	nd	81434.5	NaN	NaN	NaN	NaN	NaN	NaN	77094	85775	162870	2212.08	0.0809849	115.24	115.21	3	1			NaN	NaN	3487	41585;41586	no	no	0	1	0	3	2					By matching	By matching			1	0	2
GNPSSSCPAEGPPAASKTK	Phospho (STY);Deamidation (N);2 Oxidation (MP)	44;103	Q569H4	PRR16	Protein Largen	#VALUE!	nd	674430	NaN	NaN	NaN	NaN	NaN	NaN	674430	NaN	674430	1954.8	0.797951	107.56	107.52	2	0.043351	38384	22-Prot-0050_RD5_1_7930	41.317	19.941	3108	74325	yes	yes	0	1	2	1	1					By MS/MS				1	0	1
HRMFWREMYSVEEAEQLMTLISAAR	Phospho (STY);Oxidation (MP)		O60502;O60502-2;O60502-4;O60502-3;H7C3X0	MGEA5	Protein O-GlcNAcase	#VALUE!	nd	63455	NaN	NaN	NaN	NaN	63455	NaN	NaN	NaN	63455	3179.44	0.439196	87.631	87.631	4	1			NaN	NaN	1669	84222	no	no	0	0	1	1	2	By matching								1	0	1	1
ISDSFWPPYVELLLRNGIALRHPEDPTR	Phospho (STY);2 Oxidation (MP)		D6RHD3;Q9BS16;D6RJF0	CENPK	Centromere protein K	#VALUE!	nd	390640	NaN	NaN	NaN	NaN	390640	NaN	NaN	NaN	390640	3402.68	0.67619	102.26	102.26	4	1			NaN	NaN	879	102587	no	no	0	0	2	1	2	By matching								1	0	1	1
KVDIIADAAYSIFQK	2 Phospho (STY)		Q6YN16;Q6YN16-2	HSDL2	Hydroxysteroid dehydrogenase-like protein 2	#VALUE!	nd	1410.4	NaN	NaN	NaN	NaN	1410.4	NaN	NaN	NaN	1410.4	1840.84	0.841333	79.042	79.042	2	1			NaN	NaN	3255	115505	no	no	0	0	0	2	1	By matching								1	0	1	1
LCYVALDFEQEMATAASSSSLEK	Phospho (STY)	118	P60709;A0A2R8Y793;A0A2R8YEA7;Q6S8J3;P63261;I3L4N8	ACTB;POTEE;ACTG1	Actin, cytoplasmic 1;Actin, cytoplasmic 1, N-terminally processed;POTE ankyrin domain family member E;Actin, cytoplasmic 2;Actin, cytoplasmic 2, N-terminally processed	#VALUE!	nd	164670	NaN	NaN	NaN	NaN	NaN	NaN	NaN	164670	164670	2629.13	0.132886	105.3	105.27	3	0.00099976	58245	22-Prot-0050_RD5_1_7931	85.513	76.358	2682;2588	120399	no	no	0	0	0	1	0						By MS/MS			1	0	1
LTRNESVARSSK	2 Phospho (STY);Deamidation (N)		Q7RTP6;Q7RTP6-2;Q7RTP6-4;Q7RTP6-3;Q7RTP6-5;J3KSK6	MICAL3	Protein-methionine sulfoxide oxidase MICAL3	#VALUE!	nd	27108	NaN	NaN	NaN	NaN	NaN	NaN	27108	NaN	27108	1507.64	0.643302	36.586	36.531	3	1			NaN	NaN	3283	147672	no	no	0	1	0	2	2					By matching				1	0	1
MAPPPKEVEEDSEDEEMSEDEEDDSSGEEVVIPQKK	2 Phospho (STY)		P19338;C9JYW2;C9JLB1;C9J1H7;C9JWL1	NCL	Nucleolin	#VALUE!	nd	42861	NaN	NaN	NaN	NaN	NaN	42861	NaN	NaN	42861	4221.66	0.657953	62.219	62.211	4	1			NaN	NaN	2135	153159	yes	no	0	0	0	2	2		By matching							1	0	1		1
NIPLLFLQNITGFMVGREYEAEGIAK	Phospho (STY);2 Deamidation (N);Oxidation (MP)	111	Q9HCC0-2;Q9HCC0;D6RD67	MCCC2	Methylcrotonoyl-CoA carboxylase beta chain, mitochondrial	#VALUE!	nd	601450	NaN	NaN	NaN	NaN	NaN	NaN	948510	254390	1202900	3020.46	0.460626	103.87	103.84	3	0.01535	67135	22-Prot-0050_RD5_1_7930	44.667	25.091	4017	168559;168560	yes	no	0	2	1	1	1					By MS/MS	By matching			1	0	2
PGFATHAASINPTELVPYGLSLR	2 Phospho (STY);Deamidation (N);Oxidation (MP)		P16144-4;P16144-2;P16144-3;P16144;P16144-5	ITGB4	Integrin beta-4	#VALUE!	nd	124705	NaN	NaN	NaN	NaN	NaN	NaN	122970	126440	249410	2587.18	0.176086	61.967	61.944	3	1			NaN	NaN	2098	177429;177430	no	no	0	1	1	2	0					By matching	By matching			1	0	2
RMSGMIRLYAAIIQLR	Phospho (STY);Oxidation (MP)		Q53GS7;Q53GS7-2	GLE1	Nucleoporin GLE1	#VALUE!	nd	38879	NaN	NaN	NaN	NaN	NaN	NaN	NaN	38879	38879	1987.03	0.0260577	107.84	107.81	2	1			NaN	NaN	3103	189379	no	no	0	0	1	1	2						By matching			1	0	1
STLVLHNIFLGIQYK	Phospho (STY)	68;113	Q9Y5I7	CLDN16	Claudin-16	#VALUE!	nd	150290	NaN	NaN	NaN	NaN	NaN	NaN	NaN	150290	150290	1824.95	0.953922	91.354	91.301	2	0.049844	31236	22-Prot-0050_RD5_1_7931	40.533	20.198	4415	209687	yes	yes	0	0	0	1	0						By MS/MS			1	0	1
VSLANLKPNPGSKK	Phospho (STY);2 Deamidation (N)		Q9P015;E5RHF4	MRPL15	39S ribosomal protein L15, mitochondrial	#VALUE!	nd	13574	NaN	NaN	NaN	NaN	13574	NaN	NaN	NaN	13574	1533.78	0.780374	39.939	39.939	2	1			NaN	NaN	4165	253772	no	no	0	2	0	1	2	By matching								1	0	1	1
[truncated: 16 more columns]

## Sheet: 07-MQ proteinGrps-all proteins
					ids-Uniprot	Leading id	Dataset 1- without phosphatase	Dataset 2- with phospatase	ids-Gene Symbol	Leading id	Dataset 1- without phosphatase	Dataset 2- with phospatase			matched common wo+wPPass, n=3410	Protein ID	Protein IDs	Majority protein IDs	Protein names	Gene names	Dataset 1-commmon woPPase	Dataset 2-common wPPase	Phospho (STY) site IDs	Phospho (STY) site positions	LFQ intensity 25a_IS+PPAse-H	LFQ intensity 25b_IS+PPAse-H	LFQ intensity 26a_IS-PPAse-H	LFQ intensity 26b_IS-PPAse-H	LFQ intensity 27a_IS+PPAse-U	LFQ intensity 27b_IS+PPAse-U	LFQ intensity 28a_IS-PPAse-U	LFQ intensity 28b_IS-PPAse-U	Peptides	Razor + unique peptides	Unique peptides	Sequence coverage [%]	Unique + razor sequence coverage [%]	Unique sequence coverage [%]	Mol. weight [kDa]	Q-value	Score	Intensity	iBAQ	iBAQ peptides	MS/MS count	sum of peptides without phosphatase	sum of peptides with phosphatase	Peptides 25a_IS+PPAse-H	Peptides 25b_IS+PPAse-H
					A0A024QZ42;A0A087WZ38;E7EPW6;H0Y9X3;O75340;O75340-2;O75340-3	A0A024QZ42	+	+	A2M	A2M	+	+			common -/+ PPase	A0A024QZX5	A0A024QZX5;A0A087X1N8;A0A2R8YD12;A0A2R8Y6A7	A0A024QZX5;A0A087X1N8;A0A2R8YD12		SERPINB6	+	+			163410	170050	170740	210880	165120	174060	175070	183690	19	1	1	66.8	5.3	5.3	43.024	0	15.252	13585000	487860	21	152	65	65	16	16
N: Count	T: Datasets- ProteinID				A0A2R8Y5M6;C9J0M4;C9JQ75;C9JSP1;P51572;P51572-2	P51572-2	+	+	PRKAA1	PRKAA1	+	+			common -/+ PPase	E7EMB6	E7EMB6;A0A024R442;E7ETB3;Q9ULA0	E7EMB6;A0A024R442;E7ETB3;Q9ULA0	Aspartyl aminopeptidase	DNPEP	+	+			41592	3425.3	37142	48835	37105	38229	41058	47918	2	2	2	6.8	6.8	6.8	44.992	0.0015205	2.4772	566510	33324	17	8	7	7	2	1
277	Dataset 1- without phosphatase				A6NLM8;P51571	P51571	+	+	PRIM2	PRIM2	+	+			common -/+ PPase	Q00341	Q00341;A0A024R4E5;Q00341-2;H0Y394;H7C0A4;H7C2D1;C9JZI8;C9JIZ1;C9J5E5;H7BZC3;C9JHS7;C9JHZ8;C9JES8;C9JK79;C9JT62;C9JHN6;C9JEJ8;C9JBS3;C9JQ82;C9J739;C9JMQ6;C9JHS9	Q00341;A0A024R4E5;Q00341-2;H0Y394	Vigilin	HDLBP	+	+			207590	216580	235590	216100	183390	184910	205180	198120	27	27	27	31.2	31.2	31.2	141.45	0	315.93	16605000	110820	66	185	97	97	24	23
172	Dataset 2- with phospatase				K7EII7;K7ERJ9;P51570;P51570-2	P51570-2	+	+	PRIM1	PRIM1	+	+			common -/+ PPase	A0A024R4M0	A0A024R4M0;P46781;B5MCT8;C9JM19;F2Z3C0;A8MXK4	A0A024R4M0;P46781;B5MCT8;C9JM19	40S ribosomal protein S9	RPS9	+	+			111050	102300	129050	116390	132060	134240	123640	146900	17	17	17	45.4	45.4	45.4	22.591	0	46.775	7161900	385200	11	101	54	54	11	9
3410	Dataset 1;Dataset 2- common				E7EQB8;G5E9Q7;H0Y5Q7;P51553;P51553-2	P51553-2	+	+	PREPL	PREPL	+	+			common -/+ PPase	A0A024R6I7	A0A024R6I7;P01009;A0A0G2JRN3;P01009-2;P01009-3;G3V2B9;G3V544;G3V5R8;G3V387;A0A0B4J278	A0A024R6I7;P01009;A0A0G2JRN3;P01009-2;P01009-3	Alpha-1-antitrypsin;Short peptide from AAT	SERPINA1	+	+			1104500	913540	489.33	443.03	211.29	346.61	237.65	192.85	20	20	20	48.3	48.3	48.3	46.708	0	110.49	13839000	285750	22	60	17	17	19	19
					A6NEM2;H7C1C4;P51610;P51610-2;P51610-3;P51610-4	P51610	+	+	PREP	PREP	+	+			common -/+ PPase	A0A024RA52	A0A024RA52;P25787;C9JCK5;H3BT36;H7C402	A0A024RA52;P25787;C9JCK5	Proteasome subunit alpha type;Proteasome subunit alpha type-2	PSMA2	+	+			492620	475780	477590	520550	433920	452880	429040	423090	9	9	9	45.3	45.3	45.3	25.898	0	209.16	24176000	947550	13	123	36	36	9	9
N: Count	T: Datasets-Gene Symbols				A0A0A0MT49;A0A0U1RQZ9;A0A2R8Y440;A0A2R8Y4C5;A0A2R8Y4P4;A0A2R8Y4R6;A0A2R8Y523;A0A2R8Y526;A0A2R8Y6N0;A0A2R8Y6V2;A0A2R8Y7F3;A0A2R8Y7S2;A0A2R8Y7Y7;A0A2R8YCY3;A0A2R8YDA1;A0A2R8YF58;A0A2R8YF80;A0A2R8YFV8;A0A2R8YG32;A0A2R8YGG3;A0A2R8YGP5;F6VDE0;P51531;P51531-2;P51532;P51532-2;P51532-3;P51532-4;P51532-5;Q9HBD4	P51532-5	+	+	PRDX6	PRDX6	+	+			common -/+ PPase	A0A075B6F6	A0A075B6F6;A0A0S2Z6F0;A0A3B3IT72;A0A3B3IUB5;Q8TCT9-5;Q8TCT9;Q8TCT9-4;Q8TCT9-2	A0A075B6F6;A0A0S2Z6F0;A0A3B3IT72;A0A3B3IUB5;Q8TCT9-5;Q8TCT9;Q8TCT9-4;Q8TCT9-2	Minor histocompatibility antigen H13	HM13	+	+			28639	23726	34661	24382	28245	34114	34000	29206	1	1	1	6.2	6.2	6.2	30.162	0.0019851	2.3343	350750	26981	13	7	4	4	1	1
276	Dataset 1				A0A087WWB9;P51153	P51153	+	+	PRDX5	PRDX5	+	+			common -/+ PPase	M0R3B2	M0R3B2;A0A075B6F9;Q9Y314;M0QX85;M0R1K2;A0A075B797	M0R3B2;A0A075B6F9;Q9Y314;M0QX85;M0R1K2;A0A075B797	Nitric oxide synthase-interacting protein	NOSIP	+	+			10740	8664	17880	9781.7	13224	14144	13456	10908	4	4	4	14.9	14.9	14.9	26.804	0	7.3805	261150	12811	13	9	11	11	1	1
172	Dataset 2				C9IZZ0;C9J4S4;C9J4V0;C9J592;C9J7D1;C9J8S3;P51149	P51149	+	+	PRDX4	PRDX4	+	+			common -/+ PPase	E9PQG4	E9PQG4;A0A087WVF8;A0A0A0MRM1;A0A087WX83;A0A075B749;Q5VU43-6;Q5VU43-7;Q5VU43-13;Q5VU43-2;Q5VU43-3;Q5VU43;Q5VU43-4	E9PQG4;A0A087WVF8;A0A0A0MRM1;A0A087WX83;A0A075B749;Q5VU43-6;Q5VU43-7;Q5VU43-13;Q5VU43-2;Q5VU43-3;Q5VU43;Q5VU43-4	Myomegalin	PDE4DIP	+	+			8031.1	7673.1	11179	8521.4	9533.4	12710	20865	6610.3	2	2	2	4.6	4.6	4.6	85.353	0.00028185	3.4904	133760	3429.7	39	4	5	5	1	1
3404	Dataset 1;Dataset 2				P51809;P51809-2;P51809-3	P51809-3	+	+	PRDX3	PRDX3	+	+			common -/+ PPase	A0A286YEY3	A0A286YEY3;A0A075B7B5;B7ZM87;P0DMP2;O75044;E9PDX4;A0A087WW56;P0DJJ0;A0A075B7C8;A0A075B743;A0A087X0L1	A0A286YEY3;A0A075B7B5;B7ZM87;P0DMP2;O75044;E9PDX4;A0A087WW56;P0DJJ0	SLIT-ROBO Rho GTPase-activating protein 2B;SLIT-ROBO Rho GTPase-activating protein 2;SLIT-ROBO Rho GTPase-activating protein 2C	SRGAP2;SRGAP2B;SRGAP2C	+	+			30371	31011	35266	36645	32900	35471	44968	38668	5	5	3	14.4	14.4	11.5	53.533	0	11.873	761470	22126	22	21	15	15	4	4
					G5E9A6;P51784	P51784	+	+	PRDX2	PRDX2	+	+			common -/+ PPase	A0A075B7D9	A0A075B7D9;Q92804-2;Q92804	A0A075B7D9;Q92804-2;Q92804	TATA-binding protein-associated factor 2N	TAF15	+	+			193240	215870	123470	168550	193950	149720	189600	148590	4	3	3	15.8	12.7	12.7	48.839	0	11.583	3904400	21750	15	21	12	12	3	3
					I3NI22;P51688	P51688	+	+	PRDX1	PRDX1	+	+			common -/+ PPase	E9PKG6	E9PKG6;A0A087WSV8;P80303-2;P80303;Q2L696;H0YD18;H0YEG8;E9PLR0;E9PLE9;A0A2R8Y6G7	E9PKG6;A0A087WSV8;P80303-2;P80303;Q2L696	Nucleobindin-2;Nesfatin-1	NUCB2;Nucb2	+	+			17954	23535	22789	24939	39298	40695	36781	42012	5	5	5	16.6	16.6	16.6	40.368	0	19.441	663250	22226	17	20	13	13	3	3
					H3BNT7;H3BQV2;H3BTM8;P51665	P51665	+	+	PRCP	PRCP	+	+			common -/+ PPase	Q16881	Q16881;Q16881-3;Q16881-4;A0A087WSY9;A0A087WSW9;Q16881-6;Q16881-2;Q16881-5;A0A182DWI3;F8W809;E9PIR7;Q16881-7;E2QRB9;E9PKD3;A0A0B4J225;E9PIZ5;E9PQI3;E9PKI4;E9PLT3;E9PRI8;E9PJU2	Q16881;Q16881-3;Q16881-4;A0A087WSY9;A0A087WSW9;Q16881-6;Q16881-2;Q16881-5;A0A182DWI3;F8W809;E9PIR7;Q16881-7;E2QRB9	Thioredoxin reductase 1, cytoplasmic	TXNRD1	+	+			1051200	1080900	1079100	1138700	848520	916280	876280	869140	34	34	32	53.8	53.8	52.4	70.905	0	323.31	65708000	696470	32	277	115	115	30	25
					A0A2R8Y7L2;A0A2R8Y7W2;A0A2R8YD50;A0A2R8YDT8;A0A2R8YEG2;A0A2R8YF39;A0A2R8YF45;E7EPL9;E7ER27;E7ET17;E7EWE5;G5E9S2;P51659;P51659-2;P51659-3	P51659-3	+	+	PRKAB1;PRKAB2	PRKAB1	+	+			common -/+ PPase	P04637-5	P04637-5;A0A087X1Q1;A0A087WZU8;J3KP33;A0A087WXZ1;A0A0U1RQC9;E7ESS1;A0A087WT22;P04637-7;P04637-9;P04637-8;P04637-6;P04637-2;P04637-3;P04637-4;P04637;E7EQX7;E9PFT5	P04637-5;A0A087X1Q1;A0A087WZU8;J3KP33;A0A087WXZ1;A0A0U1RQC9;E7ESS1;A0A087WT22;P04637-7;P04637-9;P04637-8;P04637-6;P04637-2;P04637-3;P04637-4;P04637;E7EQX7;E9PFT5	Cellular tumor antigen p53	TP53	+	+			12325	13438	16197	19138	15124	14696	15140	13257	2	2	2	11.9	11.9	11.9	33.492	0	12.894	365870	19491	15	13	7	7	2	1
					C9J8Q5;P51649;P51649-2	P51649-2	+	+	PRMT5	PRMT5	+	+			common -/+ PPase	A0A087WT44	A0A087WT44;P30519-2;P30519;I3L159;I3L1F5;I3L1Y2;I3L276;I3L4P8;A0A1B0GXH0;I3L463	A0A087WT44;P30519-2;P30519;I3L159;I3L1F5	Heme oxygenase 2	HMOX2	+	+			119650	98085	122860	140450	187050	181260	175640	186680	12	12	12	39.5	39.5	39.5	41.669	0	256.22	6398800	77322	20	77	35	35	8	8
					I3L2W1;J3KTD9;J3QRD1;P51648;P51648-2	P51648-2	+	+	PRMT3	PRMT3	+	+			common -/+ PPase	A0A087WT45	A0A087WT45;Q4V328-3;Q4V328;A0A075B793;Q4V328-2;Q4V328-4;A0A087WXA6	A0A087WT45;Q4V328-3;Q4V328;A0A075B793;Q4V328-2;Q4V328-4;A0A087WXA6	GRIP1-associated protein 1	GRIPAP1	+	+			4316.1	7158.5	10428	12718	14640	17319	21344	17747	5	5	5	11.9	11.9	11.9	90.856	0	10.783	453880	4114.6	44	12	13	13	2	1
					F8VVK3;F8VVZ0;K7ENY4;K7ERI8;K7ERQ8;P51148;P51148-2	P51148-2	+	+	PRMT1	PRMT1	+	+			common -/+ PPase	A0A087X0W7	A0A087X0W7;A0A087WT95;P49753;G3V4F2;P49753-2;Q86TX2;A0A2R8Y7H3	A0A087X0W7;A0A087WT95;P49753;G3V4F2;P49753-2;Q86TX2	Acyl-coenzyme A thioesterase 2, mitochondrial;Acyl-coenzyme A thioesterase 1	ACOT2;ACOT1	+	+			14563	12217	15846	12516	19504	15868	21182	24428	5	5	5	21.4	21.4	21.4	46.292	0	10.201	600230	15551	25	12	14	14	4	3
					A0A286YFE3;A0A286YFF7;A0A286YFL8;A0A2C9F2P4;E9PIA8;E9PK48;E9PSE5;P50897;P50897-2;Q5T0S4	P50897	+	+	PRKDC	PRKDC	+	+			common -/+ PPase	F5H5N1	F5H5N1;A0A087WXF6;A0A087WTI3;F5GXJ1;O75251-2;O75251	F5H5N1;A0A087WXF6;A0A087WTI3;F5GXJ1;O75251-2;O75251	NADH dehydrogenase [ubiquinone] iron-sulfur protein 7, mitochondrial	NDUFS7	+	+			34502	38725	50823	58945	45456	43943	12432	47134	2	2	2	16.5	16.5	16.5	19.77	0	6.0026	626560	47531	10	13	8	8	2	1
					A0A087WXM8;K7ENU8;K7ERB7;P50895	P50895	+	+	PRKCSH	PRKCSH	+	+			common -/+ PPase	H3BUC4	H3BUC4;A0A087WTJ9;Q8IWV7	H3BUC4;A0A087WTJ9;Q8IWV7	E3 ubiquitin-protein ligase UBR1	UBR1	+	+			7736.3	15458	8736.2	9073.6	5700.2	4777.3	4898.7	3042.3	1	1	1	8.1	8.1	8.1	19.875	0.0024468	2.1533	75780	8420	9	1	4	4	1	1
					A0A3B3IS13;A0A3B3IU76;A0A494BZW2;A0A494C1L5;E9PEM5;H0YAC6;P50851;P50851-2;Q8NFP9-3	P50851-2	+	+	PRKCI	PRKCI	+	+			common -/+ PPase	H0YAX8	H0YAX8;E7ESG9;G3V124;A0A087WTU6;Q9NRS4-4;Q9NRS4-2;Q9NRS4-3;Q9NRS4	H0YAX8;E7ESG9;G3V124;A0A087WTU6;Q9NRS4-4;Q9NRS4-2;Q9NRS4-3;Q9NRS4	Transmembrane protease serine 4	TMPRSS4	+	+			101290	105260	86904	107590	26741	20687	23051	22478	2	2	1	32.3	32.3	32.3	6.9912	0.0005172	2.6878	612980	153240	4	7	5	5	1	1
					A0A024QZP7;A0A087WZU2;A0A087WZZ9;E5RGN0;E5RIU6;E7EUK8;F8VXD2;F8VZ51;F8VZZ0;H0YAZ9;K7ELV5;O94921;O94921-2;O94921-3;P06493;P06493-2;P11802-2;P50750;P50750-2;Q00536;Q00536-2;Q00536-3;Q07002;Q07002-3;Q96Q40;Q96Q40-3;Q96Q40-4;Q96Q40-5;Q96Q40-6	P50750-2	+	+	PRKCA	PRKCA	+	+			common -/+ PPase	A0A087WVR3	A0A087WVR3;A0A087WTW0;Q96T88;Q96T88-2;A0A087WWG9	A0A087WVR3;A0A087WTW0;Q96T88;Q96T88-2;A0A087WWG9	E3 ubiquitin-protein ligase UHRF1	UHRF1	+	+			23690	26113	26646	22496	15764	15235	18121	16633	3	3	3	6.6	6.6	6.6	91.099	0	5.5802	405800	3848.2	41	10	10	10	2	2
					E7ES84;P50748;P50748-2	P50748-2	+	+	PRKAR2B	PRKAR2B	+	+			common -/+ PPase	F8W0R1	F8W0R1;F8VR88;F8VUZ2;F8VPA6;A0A087WU02;Q96RQ1	F8W0R1;F8VR88;F8VUZ2;F8VPA6;A0A087WU02;Q96RQ1	Endoplasmic reticulum-Golgi intermediate compartment protein 2	ERGIC2	+	+			8510.4	9553.5	9508.5	7235.2	9489.3	9923.4	9352.1	9132.6	1	1	1	7.6	7.6	7.6	19.509	0.0051838	1.8468	106920	10692	10	4	4	4	1	1
					P50583	P50583	+	+	PRKAR2A	PRKAR2A	+	+			common -/+ PPase	A0A087WU64	A0A087WU64;A6NMQ1;P09884	A0A087WU64;A6NMQ1;P09884	DNA polymerase;DNA polymerase alpha catalytic subunit	POLA1	+	+			16487	15646	15240	15650	9290	11244	9936.5	13096	1	1	1	0.6	0.6	0.6	165.77	0.0067631	1.7493	146700	2037.6	72	6	4	4	1	1
					F8VQZ7;F8VRR3;F8VSC4;F8VY03;F8VZX9;G3V1U3;P50579;P50579-2;P50579-3	P50579-3	+	+	PRKAR1A;PRKAR1B	PRKAR1B	+	+			common -/+ PPase	A0A087WUB9	A0A087WUB9;Q8WYA6;Q8WYA6-4;Q8WYA6-3;Q8WYA6-2;A2A2P1	A0A087WUB9;Q8WYA6;Q8WYA6-4;Q8WYA6-3;Q8WYA6-2	Beta-catenin-like protein 1	CTNNBL1	+	+			95302	98511	82981	94275	135550	134360	133940	129960	6	6	6	12.9	12.9	12.9	65.702	0	15.461	3108000	60303	26	33	20	20	3	4
					H7C5U0;K7EMQ3;K7EPK9;P50570;P50570-2;P50570-3;P50570-4;P50570-5	P50570-5	+	+	PRKAG1	PRKAG1	+	+			common -/+ PPase	E9PRB9	E9PRB9;E9PL01;A0A087WUC6;E9PI68;Q15005	E9PRB9;E9PL01;A0A087WUC6;E9PI68;Q15005	Signal peptidase complex subunit 2	SPCS2	+	+			118930	139710	131490	124700	136370	125560	132650	103940	2	2	2	43.7	43.7	43.7	10.163	0	13.811	1859100	18044	4	11	8	8	2	2
					E7EPB3;P50914	P50914	+	+	KIN27;PRKACA;PRKACB	PRKACA	+	+			common -/+ PPase	A0A087WUE9	A0A087WUE9;Q92797;M0R3C7;Q92797-2;M0R1C2;M0R180;M0QXP5;M0R039	A0A087WUE9;Q92797;M0R3C7;Q92797-2	Symplekin	SYMPK	+	+			31511	31613	23808	33935	25003	33761	33341	31342	5	5	5	9.7	9.7	9.7	117.44	0	14.711	1083200	12474	54	23	17	17	4	4
					P51116	P51116	+	+	PRC1	PRC1	+	+			common -/+ PPase	E9PJK6	E9PJK6;A0A087WUG3;Q7L266	E9PJK6;A0A087WUG3;Q7L266	Isoaspartyl peptidase/L-asparaginase;Isoaspartyl peptidase/L-asparaginase alpha chain;Isoaspartyl peptidase/L-asparaginase beta chain	ASRGL1	+	+			29411	24211	30484	28221	24525	26361	23625	20848	1	1	1	24.3	24.3	24.3	7.203	0	5.4799	296280	98759	3	8	4	4	1	1
					B4DXZ6;C9IZ22;C9JAJ4;C9JY20;C9JZE0;E7EU85;E9PFF5;H7C4S4;P51114;P51114-2;P51114-3	P51114-3	+	+	PPWD1	PPWD1	+	+			common -/+ PPase	A0A087X1F5	A0A087X1F5;A0A087WYV9;A0A087WUM0;P57105;A0A087WTA2	A0A087X1F5;A0A087WYV9;A0A087WUM0;P57105;A0A087WTA2	Synaptojanin-2-binding protein	SYNJ2BP-COX16;SYNJ2BP	+	+			16560	14545	15876	17538	17728	11885	18188	19905	2	2	2	17.1	17.1	17.1	17.188	0	4.6956	377640	20991	9	13	4	4	1	2
					A0A0C4DGK1;F8WAT4;G3V2A0;G3V3I9;G3V457;G3XAH6;H0YJ00;H0YJL4;H7C3W0;P51003;P51003-2;Q9BWT3-2;Q9NRJ5	P51003-2	+	+	PPP2R4	PPP2R4	+	+			common -/+ PPase	E7ETK0	E7ETK0;A0A2R8Y849;A0A087WUS0;A0A2R8YD14;P62847-2;P62847-3;P62847;P62847-4;A0A2R8Y8A0	E7ETK0;A0A2R8Y849;A0A087WUS0;A0A2R8YD14;P62847-2;P62847-3;P62847;P62847-4;A0A2R8Y8A0	40S ribosomal protein S24	RPS24	+	+			432310	464750	625400	645740	562540	583290	602950	608290	9	9	9	47.3	47.3	47.3	15.197	0	125.27	16134000	1870100	6	80	34	34	8	8
					H0Y6E1;P50995;P50995-2	P50995-2	+	+	PPP2R2A	PPP2R2A	+	+			common -/+ PPase	A0A087WUT6	A0A087WUT6;O60841	A0A087WUT6;O60841	Eukaryotic translation initiation factor 5B	EIF5B	+	+			73183	75437	83329	84327	77883	75028	78313	70397	16	16	16	21.5	21.5	21.5	138.68	0	46.518	4756000	17347	52	79	43	43	13	11
					H7C2U0;H7C4C8;P50990;P50990-2;P50990-3	P50990	+	+	PPP2R1B	PPP2R1B	+	+			common -/+ PPase	A0A087WV30	A0A087WV30;C9JN51;A0A087X0G7;A0A087WUW6;A0A087X1B1;Q9Y6K9;Q9Y6K9-2;C9J2V2;Q9Y6K9-3;C9JH59	A0A087WV30;C9JN51;A0A087X0G7;A0A087WUW6;A0A087X1B1;Q9Y6K9;Q9Y6K9-2;C9J2V2;Q9Y6K9-3;C9JH59	NF-kappa-B essential modulator	IKBKG	+	+			11285	12342	16478	14783	19999	21149	16788	19363	4	4	4	54.8	54.8	54.8	12.981	0	10.109	407450	7535.4	7	13	13	13	1	3
					A0A2R8Y603;B1AXG1;B4DG22;B7ZB17;P51812	P51812	+	+	PPP2R1A	PPP2R1A	+	+			common -/+ PPase	F8W7C6	F8W7C6;A0A087WV22;H7C123;H7C2C5;Q96L21	F8W7C6;A0A087WV22		RPL10	+	+			191270	190690	255650	262430	234310	232670	246170	263750	7	1	1	35	7.4	7.4	18.565	0.00027375	3.2615	11922000	312930	8	77	26	26	6	6
					P50991;P50991-2	P50991	+	+	PPP2CA;PPP2CB	PPP2CB	+	+			common -/+ PPase	P22694-2	P22694-2;A0A087WVC4;P22694-9;P22694-6;P22694-7;P22694-5;P22694;P22694-3;P22694-4;A0A0A0MS54;B1APG1;B1APG3;B1APF7;B1APF8;B1APG2;B1APG0;B1APF9;P22694-8	P22694-2;A0A087WVC4;P22694-9;P22694-6;P22694-7;P22694-5;P22694;P22694-3;P22694-4;A0A0A0MS54;B1APG1;B1APG3;B1APF7;B1APF8;B1APG2;B1APG0;B1APF9;P22694-8	cAMP-dependent protein kinase catalytic subunit beta	PRKACB	+	+			9748.9	10049	9881	13939	19723	19498	24472	23938	2	2	1	5.5	5.5	3	46.235	0	7.9291	308810	14833	20	8	7	7	2	1
					B1AKY9;H0Y7C1;P50993	P50993	+	+	PPP1R8	PPP1R8	+	+			common -/+ PPase	A0A087WVM4	A0A087WVM4;B7ZM99;Q6UB35;H0Y327;Q5JYA8;Q5JYA3;Q6UB35-2	A0A087WVM4;B7ZM99;Q6UB35	Monofunctional C1-tetrahydrofolate synthase, mitochondrial	MTHFD1L	+	+			71125	63051	59758	44087	64270	55316	70765	69913	8	7	7	15.1	14	14	99.31	0	14.247	1818400	15943	46	35	25	25	5	8
					P51858;P51858-2;P51858-3	P51858	+	+	PPP1R7	PPP1R7	+	+			common -/+ PPase	H7C372	H7C372;C9JQZ8;A0A087WVP4;A0A087X1R1;P53814-5;P53814;P53814-6	H7C372;C9JQZ8;A0A087WVP4;A0A087X1R1;P53814-5;P53814;P53814-6	Smoothelin	SMTN	+	+			24832	22279	24305	26854	18298	16132	22514	22624	1	1	1	15	15	15	14.651	0	10.317	409820	34618	7	11	4	4	1	1
					P53007	P53007	+	+	PPP1R21	PPP1R21	+	+			common -/+ PPase	A0A087WVQ9	A0A087WVQ9;P68104-2;Q5JR01;A6PW80	A0A087WVQ9;P68104-2	Elongation factor 1-alpha 1	EEF1A1	+	+			5188100	4946500	6662000	7027700	6102600	6666400	5846700	6204700	28	1	1	66.4	3.6	3.6	47.883	1	-2	286200000	4177300	19	506	106	106	23	24
					C9J1E1;P53004	P53004	+	+	PPP1R18	PPP1R18	+	+			common -/+ PPase	A0A087WVV2	A0A087WVV2;Q9P2E9-3;Q9P2E9;F8W7S5;A0A087WU26	A0A087WVV2;Q9P2E9-3;Q9P2E9;F8W7S5;A0A087WU26	Ribosome-binding protein 1	RRBP1	+	+			34336	40921	43249	34631	29408	32025	29926	30674	10	10	10	16.6	16.6	16.6	102.77	0	39.582	1940100	14425	61	51	33	33	7	9
					P43699;P43699-3;P52952;Q9H2Z4	P52952	+	+	PPP1R12A	PPP1R12A	+	+			common -/+ PPase	A0A087WW40	A0A087WW40;Q9Y371;Q9Y371-2;Q9Y371-3	A0A087WW40;Q9Y371;Q9Y371-2;Q9Y371-3	Endophilin-B1	SH3GLB1	+	+			45198	48848	45673	47592	68513	57775	61757	64158	5	5	4	17.8	17.8	15.5	44.26	0	26.107	1213000	3181.3	16	25	14	14	5	3
					A0A3B3ITD8;H0YCR0;H0YCT1;H0YDA1;H0YDF4;H0YEN4;H7C3P6;P52948;P52948-2;P52948-3;P52948-4;P52948-5;P52948-6	P52948-6	+	+	PPP1CC	PPP1CC	+	+			common -/+ PPase	B4DGL8	B4DGL8;A0A087WW65;O75027-3;O75027;O75027-2	B4DGL8;A0A087WW65;O75027-3;O75027;O75027-2	ATP-binding cassette sub-family B member 7, mitochondrial	ABCB7	+	+			45687	39826	40864	28901	30040	29509	40616	41626	1	1	1	5	5	5	77.12	0	18.477	426260	14209	30	5	4	4	1	1
					P52907	P52907	+	+	PPP2R5A	PPP2R5A	+	+			common -/+ PPase	A0A087WW77	A0A087WW77;Q15334	A0A087WW77;Q15334	Lethal(2) giant larvae protein homolog 1	LLGL1	+	+			20187	15940	33671	30255	17754	19792	17537	19455	5	5	5	6.2	6.2	6.2	114.43	0	10.082	665220	10347	40	23	12	12	2	3
					A0A0A0MSS8;A6NHU4;B4DK69;H0Y804;P17516;P42330;P42330-2;P52895;Q04828;S4R3D5;S4R3Z2	P52895	+	+	PPP2R5C	PPP2R5C	+	+			common -/+ PPase	A0A087WWA3	A0A087WWA3;Q4R9M9;O60333-2;O60333;O60333-4;O60333-3;H7C0K6	A0A087WWA3;Q4R9M9;O60333-2;O60333;O60333-4;O60333-3	Kinesin-like protein;Kinesin-like protein KIF1B	KIF1B;KIF1Bbeta	+	+			12704	18189	18325	26514	16178	15699	16048	15656	4	4	3	4.4	4.4	3.2	202.01	0	7.8334	354950	1882.1	98	11	11	11	2	2
					K7EIK4;K7EKB6;K7EL02;K7EL32;K7EMU4;K7EP46;P52888;P52888-2	P52888-2	+	+	PPT1	PPT1	+	+			common -/+ PPase	F8W8R3	F8W8R3;A0A087WWF6;P49005;C9IZD2;C9J8Z7;C9JLE1;C9JHC7;H7C1B3	F8W8R3;A0A087WWF6;P49005;C9IZD2;C9J8Z7;C9JLE1	DNA polymerase delta subunit 2	POLD2	+	+			60293	50733	64056	55239	43592	44484	42285	41957	5	5	5	14.5	14.5	14.5	49.612	0	10.401	1139800	35852	21	29	20	20	3	5
					P52815	P52815	+	+	PPP6R3	PPP6R3	+	+			common -/+ PPase	J3KRB3	J3KRB3;A0A087WWH0;J3QS96;A0A087WXM6;J3QQT2;J3KRX5;A0A0A6YYL6;P18621;P18621-3;J3QLC8;A0A0A0MRF8;P18621-2;A0A087WY81;J3KSJ0	J3KRB3;A0A087WWH0;J3QS96;A0A087WXM6;J3QQT2;J3KRX5;A0A0A6YYL6;P18621;P18621-3;J3QLC8;A0A0A0MRF8;P18621-2;A0A087WY81	60S ribosomal protein L17	RPL17;RPL17-C18orf32	+	+			176880	194350	285620	236890	301410	294460	293490	324410	8	8	8	46.5	46.5	46.5	14.894	0	188.35	8905200	186630	7	76	27	27	6	6
					E9PB90;P52789;P52790;Q2TB90-2;Q2TB90-3	P52790	+	+	PPP6C	PPP6C	+	+			common -/+ PPase	A0A087WWM0	A0A087WWM0;O43617-2;O43617;A0A087WYS5;A6NKE1	A0A087WWM0;O43617-2;O43617;A0A087WYS5;A6NKE1	Trafficking protein particle complex subunit 3	TRAPPC3	+	+			7914.6	10465	14204	14226	33318	42807	39515	35584	2	2	2	12.2	12.2	12.2	21.231	0.00029446	3.9332	496570	35607	10	9	8	8	1	1
					A8MU39;H0YDU8;P53041	P53041	+	+	PPP5C	PPP5C	+	+			common -/+ PPase	A0A087WWP4	A0A087WWP4;A0A494C001;Q96T37-4;Q96T37-2;Q96T37-3;Q96T37	A0A087WWP4;A0A494C001;Q96T37-4;Q96T37-2;Q96T37-3;Q96T37	Putative RNA-binding protein 15	RBM15	+	+			40524	49754	49674	47260	40033	45021	55543	45328	3	3	3	7.5	7.5	7.5	102.13	0	6.4442	898490	3624.3	53	11	10	10	3	3
					P53367;P53367-2;P53367-3	P53367	+	+	PPP4R2	PPP4R2	+	+			common -/+ PPase	A0A087WWS1	A0A087WWS1;Q96FV9;A0A087WY84;Q96FV9-2;R4GN58;R4GMN4	A0A087WWS1;Q96FV9;A0A087WY84;Q96FV9-2	THO complex subunit 1	THOC1	+	+			24647	41980	39419	31063	42487	33182	41151	31682	9	9	8	20.4	20.4	18.1	75.651	0	13.515	1110000	18838	36	24	26	26	5	4
					E5RJ52;H0YBM0;P53677;Q9Y2T2	P53677	+	+	PPP4R1	PPP4R1	+	+			common -/+ PPase	A0A087WWU8	A0A087WWU8;P06753-2;P06753-5;Q5HYB6;P06753-6;J3KN67;D6R904;A0A494C0P6;P06753;P06753-7;Q5VU61;A0A494C0G0;K7EP68	A0A087WWU8;P06753-2;P06753-5;Q5HYB6;P06753-6;J3KN67;D6R904;A0A494C0P6;P06753	Tropomyosin alpha-3 chain	TPM3;DKFZp686J1372	+	+			685140	649220	967280	1007200	1659600	1793600	1638800	1746100	22	22	3	68.7	68.7	11	26.42	0	323.31	94214000	2042800	16	197	71	71	14	14
					A0A087WX41;P53675;P53675-2	P53675-2	+	+	PPP4C	PPP4C	+	+			common -/+ PPase	A0A087WXC5	A0A087WXC5;E7ESZ7;O95299;O95299-2;Q8N1B9;C9J6X0;H7C2W5;H7C1Y7;H7C2X4	A0A087WXC5;E7ESZ7;O95299;O95299-2;Q8N1B9;C9J6X0	NADH dehydrogenase [ubiquinone] 1 alpha subcomplex subunit 10, mitochondrial	NDUFA10	+	+			62098	70522	70031	64007	52221	60063	59778	61820	7	7	7	29.6	29.6	29.6	40.836	0	76.918	2416100	24801	19	38	22	22	5	3
					H0YCY8;P53634	P53634	+	+	PPP3CA;PPP3CB	PPP3CB	+	+			common -/+ PPase	Q9H270	Q9H270;A0A087WXL6;B7Z879	Q9H270;A0A087WXL6;B7Z879	Vacuolar protein sorting-associated protein 11 homolog	VPS11	+	+			10564	9858.2	11760	10078	7678	6377.2	8690.1	8874.8	2	2	2	1.9	1.9	1.9	107.84	0.00029121	3.7969	129200	2584	50	6	6	6	1	1
					A0A3B3IS23;A0A3B3IS84;A0A3B3ISC6;A0A3B3ISK1;A0A3B3IT15;A0A3B3ITI7;A0A3B3ITV3;A0A3B3ITX2;A0A3B3IU78;A0A3B3IU84;A0A3B3IU89;P53621;P53621-2	P53621-2	+	+	PPP2R5E	PPP2R5E	+	+			common -/+ PPase	A0A087WXM8	A0A087WXM8;P50895;K7ENU8;K7ERB7	A0A087WXM8;P50895;K7ENU8	Basal cell adhesion molecule	BCAM	+	+			46138	44747	53288	44921	35783	39908	35615	40897	8	8	8	20.1	20.1	20.1	63.693	0	21.409	1333600	41645	29	27	24	24	4	4
					E9PKQ1;E9PP63;E9PP73;P53618	P53618	+	+	PPP2R5D	PPP2R5D	+	+			common -/+ PPase	A0A087WXN9	A0A087WXN9;Q765P7-2;Q765P7	A0A087WXN9;Q765P7-2;Q765P7	MTSS1-like protein	MTSS1L	+	+			8471.7	7463	8724.4	11019	6752.4	5797.6	7528.5	6594.5	1	1	1	2	2	2	79.797	0.00028711	3.6551	126330	3178.6	27	12	4	4	1	1
					H3BP35;P53602	P53602	+	+	PROCR	PROCR	+	+			common -/+ PPase	A0A087WXP3	A0A087WXP3;E9PEE8;P18564-2;P18564	A0A087WXP3;E9PEE8;P18564-2;P18564	Integrin beta;Integrin beta-6	ITGB6	+	+			604080	654650	604420	664850	469410	490160	528550	554310	1	1	1	1.3	1.3	1.3	75.849	0.0058617	1.8071	6427400	189040	34	8	4	4	1	1
					P53597	P53597	+	+	PROSC	PROSC	+	+			common -/+ PPase	A0A2R8Y4Y9	A0A2R8Y4Y9;A0A2R8YEU9;A0A2R8YEH2;A0A2R8Y6Y1;A0A2R8YGP2;A0A2R8Y6Q6;A0A2R8YCJ4;A0A087WZJ6;A0A2R8Y761;A0A087WXR7;A0A2R8YCX2;A0A2R8Y7Q3;A0A2R8Y883;A0A2R8Y6M7;A0A2R8YCP1;A0A2R8YE60;A0A2R8Y687;A0A2R8Y4S2;A0A2R8YEC1;A0A2R8Y459;A0A2R8YEB4;A0A2R8Y7R8;Q5TBB1-2;Q5TBB1	A0A2R8Y4Y9;A0A2R8YEU9;A0A2R8YEH2;A0A2R8Y6Y1;A0A2R8YGP2;A0A2R8Y6Q6;A0A2R8YCJ4;A0A087WZJ6;A0A2R8Y761;A0A087WXR7;A0A2R8YCX2;A0A2R8Y7Q3;A0A2R8Y883;A0A2R8Y6M7;A0A2R8YCP1;A0A2R8YE60;A0A2R8Y687;A0A2R8Y4S2;A0A2R8YEC1;A0A2R8Y459;A0A2R8YEB4;A0A2R8Y7R8;Q5TBB1-2;Q5TBB1	Ribonuclease H2 subunit B	RNASEH2B	+	+			49546	157400	642010	143330	119890	189310	238920	222000	1	1	1	15.2	15.2	15.2	10.176	0.00027563	3.3079	4555600	639680	4	12	4	4	1	1
					K7EIE7;K7ESG8;P53396;P53396-2;P53396-3	P53396	+	+	PSMC2	PSMC2	+	+			common -/+ PPase	O43681	O43681;A0A087WXS7;K7ERW9	O43681;A0A087WXS7;K7ERW9	ATPase ASNA1	ASNA1	+	+			79382	89160	73449	77850	71613	77238	81463	80521	11	11	11	49.4	49.4	49.4	38.792	0	40.332	4576800	95130	15	60	33	33	7	6
					H0Y903;H0Y955;P53582	P53582	+	+	PSMC1	PSMC1	+	+			common -/+ PPase	H7BXI1	H7BXI1;A0A087WXU3;A0FGR8-2;A0FGR8;A0FGR8-6;A0FGR8-5;A0FGR8-4	H7BXI1;A0A087WXU3;A0FGR8-2;A0FGR8;A0FGR8-6;A0FGR8-5	Extended synaptotagmin-2	ESYT2	+	+			41618	46057	50817	52811	41595	42520	41224	43985	8	8	8	16.5	16.5	16.5	96.328	0	32.645	2266300	32211	42	44	25	25	7	7
					H7C2R7;P52788;P52788-2	P52788-2	+	+	PSMB9	PSMB9	+	+			common -/+ PPase	A0A087WY00	A0A087WY00;G3V394;F8WE88;F8W6H6;Q9Y4I1-2;Q9Y4I1;Q9Y4I1-3;Q9UES5;O95317;E7ERV5	A0A087WY00;G3V394;F8WE88;F8W6H6;Q9Y4I1-2;Q9Y4I1;Q9Y4I1-3	Unconventional myosin-Va	MYO5A	+	+			16612	32495	24657	10442	13754	20155	29149	12138	4	4	4	3.6	3.6	3.6	212.2	0	6.0435	287230	725.63	96	6	10	10	1	1
					C9JLU1;P52434;P52434-2;P52434-3;P52434-4;P52434-5	P52434-4	+	+	PSM8;PSMB8	PSMB8	+	+			common -/+ PPase	A0A087WY48	A0A087WY48;Q8IY22-3;Q8IY22-2;Q8IY22;A0A087WU05	A0A087WY48;Q8IY22-3;Q8IY22-2;Q8IY22;A0A087WU05	C-Maf-inducing protein	CMIP	+	+			34567	39171	23722	29736	11552	15120	20512	19306	3	3	3	9.9	9.9	9.9	75.99	0	10.417	442060	17002	26	11	11	11	3	3
					C9JYI4;O15131;O60684;P52294;Q5TFJ7;S4R3E5	P52294	+	+	PSMB7	PSMB7	+	+			common -/+ PPase	A0A087WY55	A0A087WY55;Q9NP79;Q5TGM0;Q9NP79-2	A0A087WY55;Q9NP79;Q5TGM0;Q9NP79-2	Vacuolar protein sorting-associated protein VTA1 homolog	VTA1	+	+			64607	66904	76294	75351	71144	47431	39421	59510	3	3	3	20	20	20	31.102	0	8.6162	1071300	60036	12	17	5	5	1	1
					J3KS65;J3QLL0;P52292	P52292	+	+	PSMB6	PSMB6	+	+			common -/+ PPase	A0A087WY71	A0A087WY71;E9PFW3;Q96CW1-2;Q96CW1;C9JJ47;C9JJD3;C9JPV8;C9JTK4;C9JGT8	A0A087WY71;E9PFW3;Q96CW1-2;Q96CW1;C9JJ47	AP-2 complex subunit mu	AP2M1	+	+			25921	27472	82352	75875	81783	81759	66232	68573	6	6	6	24	24	24	49.526	0	14.095	1707800	31326	26	23	18	18	2	2
					A0A087X0X3;M0QY96;M0QYL3;M0QYQ7;M0QZM1;M0R019;M0R0N3;M0R0Y6;M0R2I7;M0R2T0;P52272;P52272-2	P52272-2	+	+	PSMB5	PSMB5	+	+			common -/+ PPase	A0A087WYF6	A0A087WYF6;Q641Q2-2;Q641Q2;E7ESD2;F8W7U3;Q9Y4E1-2;Q9Y4E1-1;Q9Y4E1;Q9Y4E1-5;Q9Y4E1-6;Q9Y4E1-3;A0A0A0MR88;J3KP36;A0A096LPC5;A0A0A0MT65;B1AP61;Q5T1D7	A0A087WYF6;Q641Q2-2;Q641Q2;E7ESD2;F8W7U3;Q9Y4E1-2;Q9Y4E1-1;Q9Y4E1;Q9Y4E1-5;Q9Y4E1-6;Q9Y4E1-3;A0A0A0MR88;J3KP36;A0A096LPC5	WASH complex subunit FAM21A;WASH complex subunit FAM21C	FAM21A;FAM21C	+	+			518660	526770	588890	528500	471140	426670	472250	486230	11	11	10	17.7	17.7	15.2	136.57	0	53.511	6896400	20191	61	47	34	34	9	10
					K7ELN9;K7EM49;K7EMN2;K7EPF6;P52209;P52209-2	P52209-2	+	+	PSMB4	PSMB4	+	+			common -/+ PPase	C9IYS7	C9IYS7;A0A087WYI0;Q5TA45-2;Q5TA45-4;Q5TA45-3;Q5TA45;Q5TA45-5;J3QRY6;C9J979	C9IYS7;A0A087WYI0;Q5TA45-2;Q5TA45-4;Q5TA45-3;Q5TA45;Q5TA45-5;J3QRY6;C9J979	Integrator complex subunit 11	CPSF3L	+	+			14254	20200	19066	18569	13072	2501.5	13990	10984	2	2	2	5.8	5.8	5.8	56.342	0.00030807	4.5267	287890	5233.5	25	8	7	7	2	1
					P51991;P51991-2	P51991-2	+	+	PSMB3	PSMB3	+	+			common -/+ PPase	A0A087WYR0	A0A087WYR0;P09132	A0A087WYR0;P09132	Signal recognition particle 19 kDa protein	SRP19	+	+			54002	113710	2086.9	56404	52298	2678.3	101630	1713.7	2	2	2	10.8	10.8	10.8	13.654	0	4.6573	557110	87326	6	6	6	6	1	1
					P51970	P51970	+	+	PSMB2	PSMB2	+	+			common -/+ PPase	A0A087WYS1	A0A087WYS1;E7EUC7;Q16851;C9JQU9;C9J6Q0	A0A087WYS1;E7EUC7;Q16851	UTP--glucose-1-phosphate uridylyltransferase	UGP2	+	+			134940	136760	140810	151290	120500	122900	133200	136330	22	1	1	52.6	4.7	4.7	56.967	0.0019896	2.351	13096000	207740	28	165	80	80	19	19
					J3KRE2;J3KRY1;J3KS60;J3KTF8;J3QQX2;P52565;P52565-2	P52565	+	+	PSMB1	PSMB1	+	+			common -/+ PPase	Q9ULU4-19	Q9ULU4-19;Q9ULU4-9;A0A087WYS3;H7C4X9;Q9ULU4-12;Q9ULU4-7;Q9ULU4-11;Q9ULU4-10;Q9ULU4-13;Q9ULU4-20;Q9ULU4;Q9ULU4-5;Q9ULU4-16;Q9ULU4-14;Q9ULU4-18;Q9ULU4-21;Q9ULU4-8;Q9ULU4-15;Q9ULU4-17;Q9ULU4-23;Q9ULU4-6;Q9ULU4-3;Q9ULU4-22;A0A087WV57;A0A087WVZ6;Q9ULU4-4;Q9ULU4-2;Q5TH12	Q9ULU4-19;Q9ULU4-9;A0A087WYS3;H7C4X9;Q9ULU4-12;Q9ULU4-7;Q9ULU4-11;Q9ULU4-10;Q9ULU4-13;Q9ULU4-20;Q9ULU4;Q9ULU4-5;Q9ULU4-16;Q9ULU4-14;Q9ULU4-18;Q9ULU4-21;Q9ULU4-8;Q9ULU4-15;Q9ULU4-17;Q9ULU4-23;Q9ULU4-6;Q9ULU4-3;Q9ULU4-22;A0A087WV57;A0A087WVZ6	Protein kinase C-binding protein 1	ZMYND8	+	+			34592	36268	39605	41142	27966	28525	32772	32882	8	8	8	6.2	6.2	6.2	138.03	0	23	934040	7697.5	67	34	24	24	5	6
					H0YB34;H0YBX3;P52758	P52758	+	+	PSMA7	PSMA7	+	+			common -/+ PPase	A0A087WZ13	A0A087WZ13;Q8IY67-2;E9PAU2;Q8IY67;K7EKR9;Q8IY67-3	A0A087WZ13;Q8IY67-2;E9PAU2;Q8IY67	Ribonucleoprotein PTB-binding 1	RAVER1	+	+			64888	63840	61255	69185	68477	63587	76286	79709	7	7	7	17.1	17.1	17.1	77.843	0	43.503	2581100	19885	25	44	23	23	6	6
					P52735;P52735-2;P52735-3	P52735-3	+	+	PSMC3	PSMC3	+	+			common -/+ PPase	A0A087X0J3	A0A087X0J3;A0A087WZ15;P40123-2;P40123;B7Z385;F8WEW0;E9PDI2	A0A087X0J3;A0A087WZ15;P40123-2;P40123;B7Z385	Adenylyl cyclase-associated protein;Adenylyl cyclase-associated protein 2	CAP2	+	+			41119	35029	32120	37400	49783	62153	52763	57035	3	3	3	16	16	16	43.53	0	10.694	856240	22121	24	17	10	10	2	2
					P52732	P52732	+	+	PSMC4	PSMC4	+	+			common -/+ PPase	A0A087WZ88	A0A087WZ88;A0A0G2JKR7;P19793-2;P19793;P48443;P28702;P28702-3	A0A087WZ88;A0A0G2JKR7;P19793-2;P19793;P48443;P28702;P28702-3	Retinoic acid receptor RXR-alpha;Retinoic acid receptor RXR-gamma;Retinoic acid receptor RXR-beta	RXRG;RXRA;RXRB	+	+			5736.4	12609	9219.5	9349	12798	13321	12282	8477.9	1	1	1	4.1	4.1	4.1	38.608	0.00053135	2.9387	125280	5694.4	22	6	4	4	1	1
					A0A087WWJ1;A0A087WYT6;A0A494C0M1;P52701;P52701-2;P52701-3;P52701-4	P52701-4	+	+	PSMD8	PSMD8	+	+			common -/+ PPase	A0A087WZB5	A0A087WZB5;Q9HBI1-3;Q9HBI1;Q9HBI1-2;B0QYP8	A0A087WZB5;Q9HBI1-3;Q9HBI1;Q9HBI1-2;B0QYP8	Beta-parvin	PARVB	+	+			11189	11019	8221.2	9155.7	9307.8	8926.5	12728	11581	2	1	1	7.6	4.8	4.8	33.257	0.00029028	3.7678	198680	14191	14	7	7	7	2	2
					B8ZZY2;C9J2I0;P52594;P52594-2;P52594-3;P52594-4	P52594	+	+	PSMD7	PSMD7	+	+			common -/+ PPase	A0A087WZF1	A0A087WZF1;Q93052;C9JUT4;C9JXK9;C9JE51;C9J2R5;C9JIY7;C9JT42;C9J3U9;C9J1K7;C9J5C8;C9J4E3	A0A087WZF1;Q93052;C9JUT4;C9JXK9	Lipoma-preferred partner	LPP	+	+			89662	89954	126590	73998	109130	123010	94414	100140	6	6	6	16.1	16.1	16.1	63.382	0	15.274	2389900	41936	24	32	19	19	3	3
					A0A1B0GW42;P52597	P52597	+	+	PSMD6	PSMD6	+	+			common -/+ PPase	A0A087WZG4	A0A087WZG4;A0A3B3IPE9;Q6ZSZ5-2;Q6ZSZ5-1;Q6ZSZ5-6;Q6ZSZ5-5;Q6ZSZ5;M0QZS0	A0A087WZG4;A0A3B3IPE9;Q6ZSZ5-2;Q6ZSZ5-1;Q6ZSZ5-6;Q6ZSZ5-5;Q6ZSZ5;M0QZS0	Rho guanine nucleotide exchange factor 18	ARHGEF18	+	+			14646	15538	17275	7252.4	18411	19157	24038	16458	5	5	5	9.4	9.4	9.4	126.1	0	11.241	494400	1138.6	50	15	12	12	4	3
					K7EM16;K7ENL7;K7ENR7;P50552	P50552	+	+	PSMD5	PSMD5	+	+			common -/+ PPase	A0A087WZN1	A0A087WZN1;O43837;A0A087X2E5;O43837-2;O43837-3;A0A0D9SG66	A0A087WZN1;O43837;A0A087X2E5;O43837-2;O43837-3;A0A0D9SG66	Isocitrate dehydrogenase [NAD] subunit, mitochondrial;Isocitrate dehydrogenase [NAD] subunit beta, mitochondrial	IDH3B	+	+			81546	82503	84422	97052	56902	57781	56132	63635	7	7	7	24	24	24	42.41	0	12.272	2161200	60525	21	30	25	25	6	4
					A0A087WZK0;A0A3B3IU31;B4E3M2;M0QX43;M0R0V2;M0R1T4;M0R253;M0R264;P49366;P49366-2;P49366-3;Q5J8M5	P49366	+	+	PSMD3	PSMD3	+	+			common -/+ PPase	A0A087X0R1	A0A087X0R1;A0A087WZN3;Q6UWP2-2;Q6UWP2-3;Q6UWP2	A0A087X0R1;A0A087WZN3;Q6UWP2-2;Q6UWP2-3;Q6UWP2	Dehydrogenase/reductase SDR family member 11	DHRS11	+	+			15450	22210	15410	21671	22791	19565	14347	13832	1	1	1	13.8	13.8	13.8	12.177	0.0067773	1.7684	208220	29745	7	6	4	4	1	1
					B4DL54;P49356;P49356-2	P49356-2	+	+	PSMD2	PSMD2	+	+			common -/+ PPase	A0A087WZV0	A0A087WZV0;O43314-2;O43314;D6RFG4;H0Y9M0;D6RBU4;F8W9A8;B7WPL9;Q6PFW1-6;Q6PFW1-5;Q6PFW1-7;Q6PFW1-4;Q6PFW1-3;Q6PFW1-2;Q6PFW1	A0A087WZV0;O43314-2;O43314	Inositol hexakisphosphate and diphosphoinositol-pentakisphosphate kinase 2	PPIP5K2	+	+			31651	21770	17035	11615	23981	28552	34019	26477	3	3	3	4.2	4.2	4.2	144.36	0	6.8993	625600	5561.9	63	18	9	9	1	2
					A0A0U1RQF0;A0A0U1RRG3;A0A1B0GTR5;P49327	P49327	+	+	PSMA6	PSMA6	+	+			common -/+ PPase	A0A087WZX2	A0A087WZX2;O95139	A0A087WZX2;O95139	NADH dehydrogenase [ubiquinone] 1 beta subcomplex subunit 6	NDUFB6	+	+			28467	41557	19817	17897	71202	56064	30870	34176	1	1	1	25.8	25.8	25.8	11.716	0.0058658	1.8102	503920	83987	6	3	4	4	1	1
					E9PI86;E9PPQ8;H0YDS9;H0YF33;P49321;P49321-2;P49321-3;Q5T624	P49321-3	+	+	PSMD14	PSMD14	+	+			common -/+ PPase	J3KPF9	J3KPF9;A0A087X011;E9PES4;Q9Y496	J3KPF9;A0A087X011;E9PES4;Q9Y496	Kinesin-like protein;Kinesin-like protein KIF3A	KIF3A	+	+			9091.4	5520.7	7422.5	6251.9	10821	9663.2	11877	8225.3	2	2	2	5.8	5.8	5.8	80.354	0	5.0258	148880	1548.4	37	7	6	6	1	1
					P49257	P49257	+	+	PSMD13	PSMD13	+	+			common -/+ PPase	A0A087X028	A0A087X028;A0A0A0MRN5;Q9NZT2-2;Q9NZT2	A0A087X028;A0A0A0MRN5;Q9NZT2-2;Q9NZT2	Opioid growth factor receptor	OGFR	+	+			25320	22793	35133	27848	28504	23325	19890	23790	4	4	4	12.8	12.8	12.8	44.756	0	10.725	652490	14016	17	23	11	11	4	4
					P49247	P49247	+	+	PSMD12	PSMD12	+	+			common -/+ PPase	A0A087X054	A0A087X054;A0A494C039;Q9Y4L1;E9PJ21;A0A087WWI4;K7EQK2;Q9Y4L1-2;J3KTF1;J3QL06;Q9BST8;J3QQH7;J3QLE9;A0A087WW13;A0A087X214	A0A087X054;A0A494C039;Q9Y4L1;E9PJ21;A0A087WWI4;K7EQK2;Q9Y4L1-2	Hypoxia up-regulated protein 1	HYOU1	+	+			383240	389330	333110	354310	355280	354900	358390	342180	31	31	31	45.6	45.6	45.6	104.78	0	323.31	30758000	202280	48	286	107	107	25	25
					P49207	P49207	+	+	PSMD11	PSMD11	+	+			common -/+ PPase	A0A087X0M4	A0A087X0M4;Q9BWU0;H7C256;A0A087WWF4	A0A087X0M4;Q9BWU0	Kanadaptin	SLC4A1AP	+	+			17978	21365	23984	20546	19911	20919	19393	15030	7	7	7	10.8	10.8	10.8	82.89	0	38.513	684250	4493.5	41	21	18	18	2	4
					P49189;P49189-2;P49189-3	P49189-3	+	+	PSMC6	PSMC6	+	+			common -/+ PPase	A0A087X0R6	A0A087X0R6;Q9UMY4-2;Q9UMY4;Q9UMY4-3	A0A087X0R6;Q9UMY4-2;Q9UMY4;Q9UMY4-3	Sorting nexin-12	SNX12	+	+			23970	27814	25122	28102	43433	37335	40574	34832	4	3	3	24.4	20.3	20.3	19.825	0	16.504	619370	5037	11	12	12	12	1	2
					P49023-2;P49023-4	P49023-4	+	+	PSMC5	PSMC5	+	+			common -/+ PPase	A0A087X0R7	A0A087X0R7;Q9H4L4	A0A087X0R7;Q9H4L4	Sentrin-specific protease 3	SENP3-EIF4A1;SENP3	+	+			63147	72798	55437	57857	45624	48322	38854	37466	1	1	1	2.6	2.6	2.6	61.277	0.00027624	3.3179	578140	30428	19	8	4	4	1	1
					A0A1B0GTU4;A0A1B0GU60;P49023;P49023-3	P49023-3	+	+	PPP1CB	PPP1CB	+	+			common -/+ PPase	A0A087X0S5	A0A087X0S5;P12109	A0A087X0S5;P12109	Collagen alpha-1(VI) chain	COL6A1	+	+			22893	9413.9	23633	21803	24184	25696	23255	24270	5	5	5	7.8	7.8	7.8	108.34	0	20.303	581340	7955.5	53	21	11	11	1	3
					B4DKY1;E9PLP0;P49589;P49589-2;P49589-3	P49589-2	+	+	PSMA5	PSMA5	+	+			common -/+ PPase	Q2TAM5	Q2TAM5;E9PKH5;A0A087X0W8;Q04206-2;Q04206-3;Q04206;E9PI38;E9PQS6;E9PKV4;A0A087WVP0;Q04206-4	Q2TAM5;E9PKH5;A0A087X0W8;Q04206-2;Q04206-3;Q04206;E9PI38;E9PQS6;E9PKV4;A0A087WVP0;Q04206-4	Transcription factor p65	RELA	+	+			47534	61872	47452	46659	55268	49458	53989	18935	2	2	2	10.3	10.3	10.3	42.868	0	5.0885	933230	18384	23	10	8	8	2	2
					H3BPK7;P49588;P49588-2	P49588-2	+	+	PRPS1	PRPS1	+	+			common -/+ PPase	A0A087X0X3	A0A087X0X3;P52272-2;P52272;M0R019;M0R2T0;M0R0N3;M0QYQ7;M0QZM1;M0R2I7;M0R0Y6;M0QY96;M0QYL3	A0A087X0X3;P52272-2;P52272;M0R019	Heterogeneous nuclear ribonucleoprotein M	HNRNPM	+	+			938400	900890	962690	995160	764400	831450	779200	826030	31	31	31	47.7	47.7	47.7	77.569	0	323.31	76557000	1090700	47	312	119	119	27	28
					C9J050;C9J2E1;C9JEJ2;C9JPY0;C9JVS0;F2Z2B1;F8WAZ5;H7BZN1;H7C1T3;P49585;Q9Y5K3;Q9Y5K3-2;Q9Y5K3-3;Q9Y5K3-4	P49585	+	+	PRPF8	PRPF8	+	+			common -/+ PPase	A0A0G2JN29	A0A0G2JN29;A0A087X117;Q15155;A0A0G2JP90;A0A087WW46;I3L0Q6;H3BTW1;H3BUC9	A0A0G2JN29;A0A087X117;Q15155;A0A0G2JP90;A0A087WW46	Nodal modulator 1	NOMO1	+	+			71548	92105	92004	91191	91573	85922	88505	76386	18	1	1	27.3	2.7	2.7	139.54	0.002681	2.1178	7280900	45000	66	103	61	61	12	14
					E9PE20;P49458;P49458-2;Q659G3;Q6P2S0	P49458-2	+	+	PRPF6	PRPF6	+	+			common -/+ PPase	A0A087X142	A0A087X142;A6NMH6;A6NFQ9;F8W8I8;Q92599-2;Q92599-4;Q92599;Q92599-3;C9JV02;A0A0A0MRP8;C9J4G8	A0A087X142;A6NMH6;A6NFQ9;F8W8I8;Q92599-2;Q92599-4;Q92599;Q92599-3	Septin-8	2008-09-01	+	+			52133	65791	63167	55937	48734	51168	50638	46277	5	4	4	15.5	13.6	13.6	49.355	0	7.9762	1111400	10104	19	25	18	18	3	3
					P49454	P49454	+	+	PRPF4B	PRPF4B	+	+			common -/+ PPase	A0A087X1A5	A0A087X1A5;O95793-2;O95793;Q5JW30;O95793-3;Q5JW28	A0A087X1A5;O95793-2;O95793;Q5JW30;O95793-3	Double-stranded RNA-binding protein Staufen homolog 1	STAU1	+	+			87712	76764	76160	76271	72799	77670	70057	67595	8	8	8	26.6	26.6	26.6	54.945	0	18.082	2721700	52423	29	36	28	28	6	6
					P00367;P00367-2;P00367-3;P49448	P49448	+	+	PRPF40A	PRPF40A	+	+			common -/+ PPase	A0A087X1G1	A0A087X1G1;H7BYD0;Q16718-2;Q16718;F8WAS3;C9IZN5;A0A087WXR5	A0A087X1G1;H7BYD0;Q16718-2;Q16718;F8WAS3;C9IZN5	NADH dehydrogenase [ubiquinone] 1 alpha subcomplex subunit 5	NDUFA5	+	+			2825.1	9815.7	13618	11158	74308	78568	96073	71329	6	6	6	79.2	79.2	79.2	11.965	0	86.034	1981600	248590	4	24	15	15	2	1
					B4DUR8;E9PM09;E9PQ35;E9PRC8;P49368;P49368-2;Q5SZW8;Q5SZX6;Q5SZX9	P49368	+	+	PRPF4	PRPF4	+	+			common -/+ PPase	A0A0U1RQT1	A0A0U1RQT1;A0A087X1H5;Q15057;C9J8L1;H7C3K3	A0A0U1RQT1;A0A087X1H5;Q15057	Arf-GAP with coiled-coil, ANK repeat and PH domain-containing protein 2	ACAP2	+	+			20805	15763	16019	14066	19056	21931	22970	19380	3	3	3	9.7	9.7	9.7	62.841	0	5.107	383220	5411.4	31	9	8	8	2	2
					A0A0A0MRF4;P49406;S4R3W9;S4R455	P49406	+	+	PRPF38B	PRPF38B	+	+			common -/+ PPase	A0A087X1W5	A0A087X1W5;Q9BW19	A0A087X1W5;Q9BW19	Kinesin-like protein;Kinesin-like protein KIFC1	KIFC1	+	+			9969.3	4651.9	5339.1	4961.6	12169	8154.3	12769	8644.4	1	1	1	14.3	14.3	14.3	16.711	0.00028098	3.4656	140530	5656.2	8	9	4	4	1	1
					H3BNU3;P49411	P49411	+	+	PRPF38A	PRPF38A	+	+			common -/+ PPase	A0A087X1W8	A0A087X1W8;A0A0A0MTJ8;X5DQS5;Q9BY67-5;Q9BY67;Q9BY67-4;Q9BY67-3;F5H0H5;F5H8J9;F5H125;A0A087X0T8;Q9BY67-2	A0A087X1W8;A0A0A0MTJ8;X5DQS5;Q9BY67-5;Q9BY67;Q9BY67-4;Q9BY67-3;F5H0H5;F5H8J9;F5H125;A0A087X0T8;Q9BY67-2	Cell adhesion molecule 1	CADM1	+	+			12785	16158	10640	12584	12270	9222.2	8595.4	10885	2	2	2	11.9	11.9	11.9	45.676	0.0051875	1.8531	170230	5043.5	21	2	6	6	1	1
					A0A0J9YWF7;A0A1B0GTG2;A0A1B0GTJ4;A0A1B0GTY9;A0A1B0GUA1;A0A1B0GUY0;A0A1B0GV49;A0A1B0GVU0;A0A1B0GW77;A0A1B0GW82;F8VVF2;H0YHM6;P49419;P49419-2;P49419-4	P49419	+	+	PRPF31	PRPF31	+	+			common -/+ PPase	A0A087X1Z3	A0A087X1Z3;Q9UL46;H0YM70;H0YKU2	A0A087X1Z3;Q9UL46;H0YM70	Proteasome activator complex subunit 2	PSME2	+	+			86720	80311	125140	139060	257150	267350	264000	274550	8	8	8	37.4	37.4	37.4	29.126	0	144.69	7046100	128660	15	75	31	31	6	5
					B7ZAR1;D6RIZ7;E7ENZ3;E9PCA1;H0Y914;P48643;P48643-2	P48643-2	+	+	PRPF3	PRPF3	+	+			common -/+ PPase	A0A087X211	A0A087X211;Q8TCG1;Q8TCG1-2;F8WF26;F8WAX6	A0A087X211;Q8TCG1;Q8TCG1-2	Protein CIP2A	KIAA1524	+	+			32639	24445	23101	29608	19535	12099	13528	17467	3	3	3	3.9	3.9	3.9	102.28	0	5.2098	354120	5701.6	56	7	9	9	2	2
					A0A0S2Z4J7;A0A2R8Y2F2;A0A2R8Y2X9;A0A2R8Y430;A0A2R8Y446;A0A2R8Y4V9;A0A2R8Y5T7;A0A2R8Y6Q7;A0A2R8Y6Y6;A0A2R8Y790;A0A2R8Y7I7;A0A2R8YF34;P48637;P48637-2	P48637-2	+	+	PRPF19	PRPF19	+	+			common -/+ PPase	A0A087X253	A0A087X253;P63010-3;P63010;P63010-2;A0A087WYD1;A0A087WU93;A0A087WZQ6;K7EJ01	A0A087X253;P63010-3;P63010;P63010-2;A0A087WYD1;A0A087WU93;A0A087WZQ6	AP-2 complex subunit beta	AP2B1	+	+			202380	196800	198450	184370	192900	191350	200050	198170	22	22	13	27.4	27.4	16	101.33	0	213.22	14634000	125780	42	173	78	78	17	15
					K7EJC1;K7EJR3;K7ENY6;P48556;R4GMR5	P48556	+	+	PRPS2	PRPS2	+	+			common -/+ PPase	A0A087X256	A0A087X256;Q2M389;Q2M389-2;F8W1W1;F8VYH7;F8VNZ5	A0A087X256;Q2M389;Q2M389-2	WASH complex subunit 7	KIAA1033	+	+			55139	46083	42543	48173	48014	41234	47158	50605	10	10	10	15.6	15.6	15.6	136.5	0	41	2114500	21644	65	42	34	34	7	8
					P48507;P48507-2	P48507-2	+	+	PRPSAP1	PRPSAP1	+	+			common -/+ PPase	A0A087X279	A0A087X279;P09913	A0A087X279;P09913	Interferon-induced protein with tetratricopeptide repeats 2	IFIT2	+	+			7550	9878.5	11411	9704.5	10687	10993	11298	8626.8	1	1	1	3.5	3.5	3.5	55.984	0.00030855	4.5552	117590	4199.6	28	3	4	4	1	1
					A0A0C4DGB2;A0A2R8Y648;A0A2R8YEL6;B4E2I4;D6RGF8;E1CEI4;P48506	P48506	+	+	PSMA4	PSMA4	+	+			common -/+ PPase	E9PDU5	E9PDU5;A0A087X295;Q9NNW5;C9JFP6;V9GYU1;C9K020;V9GZ65;E9PBK6	E9PDU5;A0A087X295;Q9NNW5;C9JFP6;V9GYU1;C9K020	WD repeat-containing protein 6	WDR6	+	+			18097	31499	24984	28695	17227	20730	19534	15015	3	3	3	3.4	3.4	3.4	116.17	0.00028003	3.4265	253470	5298	46	10	6	6	1	1
					E7ETC2;E9PK68;E9PPC8;H0YC26;P16298;P16298-2;P16298-3;P16298-4;P48454;P48454-2;P48454-3;Q08209;Q08209-2;Q08209-3;Q08209-4;Q08209-5;Q5F2F8;Q5F2G0	P48454-3	+	+	PSMA3	PSMA3	+	+			common -/+ PPase	A0A087X2B5	A0A087X2B5;P35613-2;P35613;I3L192;A0A087WUV8;P35613-3;P35613-4;R4GN83;R4GMX5;A0A2R8YDZ0	A0A087X2B5;P35613-2;P35613;I3L192;A0A087WUV8;P35613-3;P35613-4	Basigin	BSG	+	+			179370	199760	188400	251330	178250	198380	186410	188860	3	3	3	20.8	20.8	20.8	23.896	0	12.756	3533500	221170	11	27	11	11	3	3
					B0YIW6;E9PK34;P48444;P48444-2;Q6P1Q5	P48444-2	+	+	PSMA2	PSMA2	+	+			common -/+ PPase	A0A087X2D0	A0A087X2D0;P84103-2;P84103	A0A087X2D0;P84103-2;P84103	Serine/arginine-rich splicing factor 3	SRSF3	+	+			799630	841400	836720	871340	848300	882130	932820	839870	4	4	4	54.7	54.7	54.7	10.32	0	81.738	26448000	809700	7	51	16	16	4	4
					A0A087WZ88;A0A0G2JKR7;P19793;P19793-2;P28702;P28702-3;P48443	P48443	+	+	PSMA1	PSMA1	+	+			common -/+ PPase	A0A087X2D5	A0A087X2D5;Q9BRJ2;A0A0G2JMS5;A0A087WU62	A0A087X2D5;Q9BRJ2;A0A0G2JMS5;A0A087WU62	39S ribosomal protein L45, mitochondrial	MRPL45	+	+			76634	64681	79857	80907	69406	55698	65847	75249	3	3	3	20.9	20.9	20.9	35.29	0	39.503	1783700	11743	20	23	11	11	3	3
					H7BXS3;P48426;P48426-2	P48426-2	+	+	PSIP1	PSIP1	+	+			common -/+ PPase	A0A087X2H1	A0A087X2H1;Q9ULT8;H0YJP0;G3V4V5;H0YJD4;A0A087WVU6	A0A087X2H1;Q9ULT8;H0YJP0	E3 ubiquitin-protein ligase HECTD1	HECTD1	+	+			61831	66637	70675	75827	64640	60734	60363	58652	22	22	22	12.9	12.9	12.9	289.63	0	48.702	4578000	24353	125	84	68	68	14	12
					P48681	P48681	+	+	PSAT1	PSAT1	+	+			common -/+ PPase	A0A087X2I1	A0A087X2I1;P62333;H0YJC0;H0YJT1;H0YJS8;H0YJE9;H0YJX2	A0A087X2I1;P62333;H0YJC0	26S protease regulatory subunit 10B	PSMC6	+	+			183330	191490	206340	210330	261570	272570	279050	281790	21	21	19	48.4	48.4	43.7	45.796	0	321.68	14567000	248060	23	143	69	69	15	15
					P48723	P48723	+	+	PSAP	PSAP	+	+			common -/+ PPase	E7EVK1	E7EVK1;A0A088AWL3;O75376-2;O75376;J3KRE4	E7EVK1;A0A088AWL3;O75376-2;O75376;J3KRE4	Nuclear receptor corepressor 1	NCOR1	+	+			20577	23254	23056	21838	34401	34788	30146	29509	2	2	2	3.3	3.3	3.3	116.26	0.0002791	3.3929	379310	5400.6	58	5	8	8	1	1
					A0A087WWF6;C9IZD2;C9J8Z7;C9JHC7;C9JLE1;F8W8R3;H7C1B3;P49005	P49005	+	+	PRUNE	PRUNE	+	+			common -/+ PPase	C9JFE4	C9JFE4;Q13098-7;Q13098;Q13098-5;A8K070;A0A096LPJ3;A0A096LP07;Q13098-6;J3KSA5;J3QS88;J3KTB0;J3QLT0;J3KRJ4;J3QL53;J3QS84;J3KRE8;J3QLE8;J3QQX0	C9JFE4;Q13098-7;Q13098;Q13098-5;A8K070;A0A096LPJ3;A0A096LP07;Q13098-6;J3KSA5	COP9 signalosome complex subunit 1	GPS1	+	+			97155	100710	124780	93403	86643	86477	91556	85078	10	10	10	30.8	30.8	30.8	53.371	0	30.838	4290900	49159	18	58	30	30	7	6
					B4DWB8;M0QY55;M0R0K5;P48960;P48960-2;P48960-3;Q9UHX3;Q9UHX3-2;Q9UHX3-3;Q9UHX3-4;Q9UHX3-5;Q9UHX3-6	P48960-3	+	+	PRSS23	PRSS23	+	+			common -/+ PPase	A0A096LP34	A0A096LP34;A0A096LP22;C9J7Z1;Q86Y79	A0A096LP34;A0A096LP22;C9J7Z1;Q86Y79	Probable peptidyl-tRNA hydrolase	PTRH1	+	+			15645	14726	24866	28370	30699	27533	38278	35849	1	1	1	18.2	18.2	18.2	14.956	0	12.008	336760	42095	8	8	4	4	1	1
					P17066;P48741	P48741	+	+	PRRC1	PRRC1	+	+			common -/+ PPase	A0A096LP25	A0A096LP25;Q6ZSR9;A0A096LNZ0	A0A096LP25;Q6ZSR9;A0A096LNZ0	Uncharacterized protein FLJ45252	AAK1	+	+			71506	72598	85441	66909	61947	59862	62542	49012	5	5	4	27.8	27.8	20.4	54.448	0	12.438	1487800	39195	19	20	18	18	4	5
					A0A0A0MSW4;B3KYB6;B3KYB7;P48739;P48739-2;P48739-3	P48739-3	+	+	PRPSAP2	PRPSAP2	+	+			common -/+ PPase	A0A096LPI6	A0A096LPI6;P0DPI2-2;A0A0B4J2H4;A0A0B4J2D5-2;P0DPI2;A0A0B4J2D5;A0A096LNH5;A0A096LNJ1;A0A096LP73;A0A2R8Y6K9;A0A2R8YDR7;F2Z2Q0;A0A096LP12;H7C1F6;H7C2G3	A0A096LPI6;P0DPI2-2;A0A0B4J2H4;A0A0B4J2D5-2;P0DPI2;A0A0B4J2D5;A0A096LNH5;A0A096LNJ1;A0A096LP73;A0A2R8Y6K9;A0A2R8YDR7;F2Z2Q0;A0A096LP12		C21orf33	+	+			36578	36183	41170	51318	33530	29326	63165	50034	6	5	3	31.9	27.2	17.6	30.376	0	7.8558	1464400	13046	18	17	17	17	3	2
					H0YL11;P48735;P48735-2	P48735-2	+	+	PPP1CA	PPP1CA	+	+			common -/+ PPase	A2A2L6	A2A2L6;A2A2L5;A0A0A0MQR2;Q9BY42	A2A2L6;A2A2L5;A0A0A0MQR2;Q9BY42	Protein RTF2 homolog	RTFDC1	+	+			10120	19543	10063	16263	20833	22794	24945	12347	2	2	2	7.8	7.8	7.8	26.074	0.00028353	3.5386	357170	17646	10	8	7	7	1	1
					D6REM4;D6RGE5;E5RG27;E7ETM0;H0Y9X2;P48729;P48729-2;P48729-3;Q8N752;U3KPX3;U3KQ83;U3KQK7	P48729	+	+	PLCG1	PLCG1	+	+			common -/+ PPase	U3KQC1	U3KQC1;K7EIR0;A0A0A0MQU0;Q9BV38;A0A087X237;K7EKX5;K7EML4	U3KQC1;K7EIR0;A0A0A0MQU0;Q9BV38;A0A087X237;K7EKX5;K7EML4	WD repeat-containing protein 18	WDR18	+	+			50668	53248	51261	70942	44871	45481	52431	50853	3	3	3	8.9	8.9	8.9	43.237	0	9.4079	1323400	56300	20	25	12	12	3	3
					B0QY34;B0QY35;B0QY36;H0Y2N6;H0Y645;H0Y682;H7BYT1;J3QQI9;P48730;P48730-2;P49674	P48730	+	+	PLCB3	PLCB3	+	+			common -/+ PPase	A0A0A0MQW0	A0A0A0MQW0;Q9P2K5-2;H0YN19;A0A0C4DGV1;Q9P2K5-3	A0A0A0MQW0;Q9P2K5-2;H0YN19;A0A0C4DGV1	Myelin expression factor 2	MYEF2	+	+			99591	119750	117510	114500	83255	83772	86511	86045	10	10	1	28.8	28.8	3.6	61.957	0	30.407	5384200	108810	26	58	34	34	6	7
					M0QYZ2;M0QZ21;M0R0N4;M0R1S0;P53680;P53680-2;X6R390	P53680	+	+	PLBD2	PLBD2	+	+			common -/+ PPase	F8W978	F8W978;A0A0A0MR49;Q08477-2;Q08477;Q9HCS2;Q9HBI6	F8W978;A0A0A0MR49;Q08477-2;Q08477;Q9HCS2;Q9HBI6	Docosahexaenoic acid omega-hydroxylase CYP4F3;Cytochrome P450 4F12;Phylloquinone omega-hydroxylase CYP4F11	CYP4F11;CYP4F12;CYP4F3	+	+			6660.6	4598.7	7819.9	3543.4	9723	11253	10265	7275.1	1	1	1	3.7	3.7	3.7	52.194	0.002004	2.3995	94368	3629.5	26	4	4	4	1	1
					A0A2R8Y3N3;A0A2R8Y4X6;A0A2R8Y5E8;A0A2R8Y5P7;A0A2R8Y6I1;A0A2R8YCI2;A0A2R8YFR1;B3KWE1;B4DDD8;B4DQ67;B4E1C5;D6RB22;D6RF05;D6RJE6;E7ETE2;P12081;P12081-2;P12081-3;P12081-4;P49590;P49590-2	P49590	+	+	PLAUR	PLAUR	+	+			common -/+ PPase	A0A0A0MR50	A0A0A0MR50;Q13619-2;Q13619;A0A087WWN2	A0A0A0MR50;Q13619-2;Q13619	Cullin-4A	CUL4A	+	+			36186	37203	46751	50075	36568	32593	39673	31327	5	5	3	9.7	9.7	6.6	77.719	0	18.488	1127300	11015	41	32	18	18	4	4
					H0YKD0;H0YL72;H0YLI6;H0YM64;H0YMU3;H0YNF5;P50213;P50213-2	P50213-2	+	+	PLAU	PLAU	+	+			common -/+ PPase	A0A0A0MR59	A0A0A0MR59;Q8TB72-2;Q8TB72-4;Q8TB72-3;Q8TB72;C9JW01;A0A0C4DG68	A0A0A0MR59;Q8TB72-2;Q8TB72-4;Q8TB72-3;Q8TB72;C9JW01;A0A0C4DG68	Pumilio homolog 2	PUM2	+	+			21152	6623.7	11468	11554	20614	19012	12189	17991	2	2	2	4.6	4.6	4.6	99.645	0	6.0428	221720	7152.2	31	7	7	7	2	1
					P50148	P50148	+	+	PLAA	PLAA	+	+			common -/+ PPase	A0A0A0MRA3	A0A0A0MRA3;A0A0A0MTS7;Q8WZ42-3;Q8WZ42-10;Q8WZ42-9;Q8WZ42-5;Q8WZ42-11;Q8WZ42-4;Q8WZ42-7;Q8WZ42-2;Q8WZ42;Q8WZ42-8;Q8WZ42-13;Q8WZ42-12;H7C1P9;Q8WZ42-6	A0A0A0MRA3;A0A0A0MTS7;Q8WZ42-3;Q8WZ42-10;Q8WZ42-9;Q8WZ42-5;Q8WZ42-11;Q8WZ42-4;Q8WZ42-7;Q8WZ42-2;Q8WZ42;Q8WZ42-8;Q8WZ42-13;Q8WZ42-12	Titin	TTN	+	+			170010	219190	222010	185280	204930	177980	180030	97095	5	5	3	0.2	0.2	0.1	3014	0.00076687	2.5769	2772300	507.66	1506	12	16	16	4	2
					F5GXT0;F5H256;F5H742;F8W7U8;P49959;P49959-2;P49959-3	P49959-3	+	+	PKP3	PKP3	+	+			common -/+ PPase	A0A0A0MRA5	A0A0A0MRA5;B7Z4B8;Q9BUJ2-3;Q9BUJ2-4;Q9BUJ2-2;Q9BUJ2;M0R3F1;M0QYZ0;M0R203;M0QZV6;M0R0K8;M0QYI8	A0A0A0MRA5;B7Z4B8;Q9BUJ2-3;Q9BUJ2-4;Q9BUJ2-2;Q9BUJ2;M0R3F1;M0QYZ0	Heterogeneous nuclear ribonucleoprotein U-like protein 1	HNRNPUL1	+	+			101290	114460	124170	110230	82110	86876	77902	86026	11	11	11	20.5	20.5	20.5	85.939	0	38.188	4047500	62428	33	47	33	33	9	9
					K7ENR9;K7EQB6;K7ERZ5;P49916;P49916-2;P49916-3;P49916-4	P49916-4	+	+	PKN2	PKN2	+	+			common -/+ PPase	G3V5X4	G3V5X4;A0A0A0MRE3;Q8WXH0;Q8WXH0-2	G3V5X4;A0A0A0MRE3;Q8WXH0;Q8WXH0-2	Nesprin-2	SYNE2	+	+			4145.1	4559.5	4411.7	3802.8	9478.9	5473.5	11315	7678.6	2	2	2	0.6	0.6	0.6	787.71	0.00027307	3.238	94268	241.71	390	5	6	6	2	1
					F8W1B7;P50281	P50281	+	+	PKN1	PKN1	+	+			common -/+ PPase	A0A0A0MRE5	A0A0A0MRE5;Q9ULH1;Q9ULH1-2;E5RHD7;A0A286YFG8;H0YBF7	A0A0A0MRE5;Q9ULH1;Q9ULH1-2;E5RHD7;A0A286YFG8;H0YBF7	Arf-GAP with SH3 domain, ANK repeat and PH domain-containing protein 1	ASAP1	+	+			14684	15680	16127	18155	10722	10985	12170	8684.7	2	1	1	2.6	1.7	1.7	124.77	0.00027152	3.1772	205950	1021	57	7	7	7	2	2
					P49915;P49915-2	P49915-2	+	+	PITRM1	PITRM1	+	+			common -/+ PPase	A0A0A0MRH0	A0A0A0MRH0;Q9NVX2;K7EN33;Q9NVX2-2;K7ERN7	A0A0A0MRH0;Q9NVX2;K7EN33;Q9NVX2-2	Notchless protein homolog 1	NLE1	+	+			73708	70132	74618	78597	53294	54679	49604	56109	6	6	6	29.1	29.1	29.1	48.511	0	32.535	1833400	12624	21	31	21	21	4	5
					P49903;P49903-2;P49903-3;P49903-4;Q5T5U6;Q5T5U7	P49903-4	+	+	PITPNB	PITPNB	+	+			common -/+ PPase	H0Y6V3	H0Y6V3;H0Y7V8;A0A0A0MRJ1;H0Y5V1;A0A0A0MRJ0;Q5VT25-3;Q5VT25-4;Q5VT25-5;Q5VT25;Q5VT25-2;Q5VT25-6;H0Y6R0	H0Y6V3;H0Y7V8;A0A0A0MRJ1;H0Y5V1;A0A0A0MRJ0;Q5VT25-3;Q5VT25-4;Q5VT25-5;Q5VT25;Q5VT25-2;Q5VT25-6;H0Y6R0	Non-specific serine/threonine protein kinase;Serine/threonine-protein kinase MRCK alpha	CDC42BPA	+	+			2140.1	8169.7	7521.1	5807.8	7649.3	7028	5431	5218.9	3	3	3	8.5	8.5	8.5	81.575	0.00027933	3.3997	97578	85.101	37	5	4	4	1	1
					A0A1W2PRF9;A0A494C0D4;A0A494C0M9;A0A494C134;A0A494C146;D3DVG2;H0YFP3;P50336	P50336	+	+	PITHD1	PITHD1	+	+			common -/+ PPase	A0A0A0MRJ3	A0A0A0MRJ3;Q8NEY1-5;Q8NEY1-7;Q8NEY1-4;Q8NEY1-2;Q8NEY1-3;Q8NEY1	A0A0A0MRJ3;Q8NEY1-5;Q8NEY1-7;Q8NEY1-4;Q8NEY1-2;Q8NEY1-3;Q8NEY1	Neuron navigator 1	NAV1	+	+			23117	27118	24115	28892	26565	23567	23209	27034	1	1	1	0.9	0.9	0.9	197.4	0.00028289	3.5255	293150	2991.4	98	8	4	4	1	1
					B4E0T2;F5GXX3;F5H205;F5H3X7;F5H432;F5H5C0;F5H637;H0YGT8;J3KPV0;P50542;P50542-2;P50542-3;P50542-4	P50542-4	+	+	PIR	PIR	+	+			common -/+ PPase	A0A0A0MRJ6	A0A0A0MRJ6;H7BY58;P22061;P22061-2;F6S8N6;A0A3F2YNX8;C9J0F2;F8WDT3;F8WAV5;F8WAX2	A0A0A0MRJ6;H7BY58;P22061;P22061-2;F6S8N6;A0A3F2YNX8	Protein-L-isoaspartate O-methyltransferase;Protein-L-isoaspartate(D-aspartate) O-methyltransferase	PCMT1	+	+			91815	85011	99739	63451	176940	157020	164180	161600	6	6	6	44.2	44.2	44.2	30.315	0	30.084	4022900	14240	15	37	23	23	4	2
					F6VDH7;H7C3I1;P50502;Q3KNR6;Q8IZP2;Q8NFI4	P50502	+	+	PLD3	PLD3	+	+			common -/+ PPase	A0A0A0MRM8	A0A0A0MRM8;A0A0D9SGC1;E7EW20;Q9UM54-5;Q9UM54-2;Q9UM54-6;Q9UM54-4;Q9UM54-1;Q9UM54;Q5JVM0	A0A0A0MRM8;A0A0D9SGC1;E7EW20;Q9UM54-5;Q9UM54-2;Q9UM54-6;Q9UM54-4;Q9UM54-1;Q9UM54	Unconventional myosin-VI	MYO6	+	+			8336.8	16003	14969	13779	11714	12583	9315.7	11216	4	4	4	4.8	4.8	4.8	145.01	0	12.607	350170	1159	60	12	10	10	1	3
					E9PIG2;E9PJH8;E9PK86;E9PKH2;E9PLA6;E9PMI5;E9PNX1;E9PPV6;E9PQ34;E9PR70;E9PRS3;H0YEP8;P50454	P50454	+	+	PLEK2	PLEK2	+	+			common -/+ PPase	A0A0A0MRM9	A0A0A0MRM9;Q14978;Q14978-2;S4R402;S4R349	A0A0A0MRM9;Q14978;Q14978-2;S4R402;S4R349	Nucleolar and coiled-body phosphoprotein 1	NOLC1	+	+			276040	272760	263240	266390	208660	217980	231720	229720	7	1	1	10.2	3.2	3.2	74.543	0	11.13	8465100	127020	33	58	18	18	6	6
					P50453	P50453	+	+	PMPCA	PMPCA	+	+			common -/+ PPase	A0A0A0MRR7	A0A0A0MRR7;P09234	A0A0A0MRR7;P09234	U1 small nuclear ribonucleoprotein C	SNRPC	+	+			81014	91449	117980	133630	157950	160300	160890	150400	2	2	2	11.7	11.7	11.7	19.687	0	53.076	1846000	30889	8	9	8	8	2	2
					A0A1B0GU38;C9JTJ8;C9JVA8;H7BXK7;P50452;P50452-2;P50452-3	P50452-3	+	+	PML	PML	+	+			common -/+ PPase	B6VEX4	B6VEX4;A0A0A0MRT6;Q8IZP0-10;Q8IZP0-8;Q8IZP0-7;Q8IZP0-2;Q8IZP0-4;Q8IZP0-3;Q8IZP0-5;Q8IZP0-6;Q8IZP0-9;Q8IZP0-12;Q8IZP0;Q8IZP0-11	B6VEX4;A0A0A0MRT6;Q8IZP0-10;Q8IZP0-8;Q8IZP0-7;Q8IZP0-2;Q8IZP0-4;Q8IZP0-3;Q8IZP0-5;Q8IZP0-6;Q8IZP0-9;Q8IZP0-12;Q8IZP0;Q8IZP0-11	Abl interactor 1	ABI1	+	+			49429	45376	43061	50848	36178	34417	31326	36831	4	4	4	14	14	14	43.294	0	8.7951	980600	39273	18	11	12	12	2	2
					P50395;P50395-2;Q5SX86;Q5SX87;Q5SX90;V9GYF8;V9GYJ7	P50395	+	+	PLXNB2	PLXNB2	+	+			common -/+ PPase	F8W6G5	F8W6G5;C9JZ40;A0A0A0MRW7;Q7Z2E3-6;Q7Z2E3-2;Q7Z2E3-4;Q7Z2E3-3;Q7Z2E3-5;Q7Z2E3-9;Q7Z2E3-10;Q7Z2E3-11;Q7Z2E3-8;Q7Z2E3-7;Q7Z2E3	F8W6G5;C9JZ40;A0A0A0MRW7;Q7Z2E3-6;Q7Z2E3-2;Q7Z2E3-4;Q7Z2E3-3;Q7Z2E3-5;Q7Z2E3-9;Q7Z2E3-10;Q7Z2E3-11;Q7Z2E3-8;Q7Z2E3-7;Q7Z2E3	Aprataxin	APTX	+	+			2454.5	4270.7	14650	14906	12953	11394	14511	14790	1	1	1	7.6	7.6	7.6	22.763	0.00029104	3.7897	137750	12522	11	6	4	4	1	1
					F8WEQ1;P50402;Q5HY57	P50402	+	+	PLS3	PLS3	+	+			common -/+ PPase	P01857	P01857;A0A0A0MS08;A0A0A0MS07	P01857;A0A0A0MS08;A0A0A0MS07	Ig gamma-1 chain C region	IGHG1	+	+			3917300	5114800	23355	14572	8616.3	3830.2	1833.4	1902.1	11	11	4	39.7	39.7	19.7	36.105	0	234.49	41452000	1182300	15	56	9	9	10	10
					H3BMD2;P50416;P50416-2	P50416	+	+	PLS1	PLS1	+	+			common -/+ PPase	A0A0A0MS41	A0A0A0MS41;A0A1P0AYU5;Q9BWM7;S4R3N9	A0A0A0MS41;A0A1P0AYU5;Q9BWM7;S4R3N9	Sideroflexin;Sideroflexin-3	SFXN3	+	+			41238	43312	63409	80572	69758	82121	63896	67267	9	8	8	41.1	35.2	35.2	35.503	0	25.6	2847700	130270	20	43	30	30	5	6
					H0YHR8;P49902;P49902-2;Q5JUV3;Q5JUV4;Q5JUV6	P49902-2	+	+	PLOD3	PLOD3	+	+			common -/+ PPase	A0A0A0MS45	A0A0A0MS45;J3KNI1;Q9H9E3;Q9H9E3-3;Q9H9E3-2;J3QLW1;E9PRT5;H3BSD2;H3BQB2;H3BMV9	A0A0A0MS45;J3KNI1;Q9H9E3;Q9H9E3-3	Conserved oligomeric Golgi complex subunit 4	COG4	+	+			19703	19427	25133	22736	15876	16173	12399	15584	6	6	6	13.2	13.2	13.2	87.183	0	7.3364	492720	8504.2	42	11	13	13	3	2
					F8VU51;H0YI23;H0YIQ2;P49750;P49750-1;P49750-3	P49750	+	+	PLOD2	PLOD2	+	+			common -/+ PPase	A0A0A0MS51	A0A0A0MS51;A0A0A0MT01;P06396-2;P06396-4;P06396-3;P06396;A0A0U1RQL8;Q5T0I0	A0A0A0MS51;A0A0A0MT01;P06396-2;P06396-4;P06396-3;P06396	Gelsolin	GSN	+	+			130740	125190	40461	46687	47878	52234	54028	54495	9	9	5	25.4	25.4	15.8	82.525	0	48.927	2795800	45449	33	41	25	25	9	8
					G3V1M7;J3KS89;J3KSR4;J3QKU9;J3QRJ8;K7EJW8;K7EMF8;K7EQP4;P49748;P49748-2;P49748-3	P49748-3	+	+	PLOD1	PLOD1	+	+			common -/+ PPase	F6X344	F6X344;A0A0A0MS57;Q96JA4-2;Q96JA4;Q96JA4-5	F6X344;A0A0A0MS57;Q96JA4-2;Q96JA4;Q96JA4-5	Membrane-spanning 4-domains subfamily A member 14	MS4A14	+	+			173650	214470	367630	162660	200820	235460	162520	91518	1	1	1	2.6	2.6	2.6	64.302	1	-2	2292000	91678	25	1	4	4	1	1
					C9J013;C9JZ21;F8WDM3;H0Y8E6;H7C4N9;P49736	P49736	+	+	PLIN3	PLIN3	+	+			common -/+ PPase	A0A0A0MS99	A0A0A0MS99;I3L4X2;P33527-5;P33527-2;P33527-3;P33527;P33527-9;P33527-8;P33527-6;P33527-7;P33527-4	A0A0A0MS99;I3L4X2;P33527-5;P33527-2;P33527-3;P33527;P33527-9;P33527-8;P33527-6;P33527-7;P33527-4	Multidrug resistance-associated protein 1	ABCC1	+	+			43013	38216	33752	30107	34480	36439	37527	34314	5	5	5	7.3	7.3	7.3	134.99	0	27.032	1404500	6857.5	57	41	19	19	4	3
					A0A087WVV1;P49721	P49721	+	+	PLIN2	PLIN2	+	+			common -/+ PPase	A0A0A0MSA9	A0A0A0MSA9;A0A0C4DG49;P15151-3;P15151-2;P15151-4;P15151	A0A0A0MSA9;A0A0C4DG49;P15151-3;P15151-2;P15151-4;P15151	Poliovirus receptor	PVR	+	+			33550	32144	31080	33936	24435	27293	25582	27270	2	2	2	4.8	4.8	4.8	42.882	0.00076628	2.5692	457410	35186	13	13	8	8	2	2
					A0A087WUL2;A0A087WXQ8;A0A087WY10;P49720	P49720	+	+	PLEKHG4	PLEKHG4	+	+			common -/+ PPase	A0A0A0MSB8	A0A0A0MSB8;Q9UPT5-2;Q9UPT5-5;Q9UPT5-1;Q9UPT5-6;Q9UPT5;A0A0A0MRE1;B4DJ07;B5MCY9;K7ERQ5;Q9UPT5-4	A0A0A0MSB8;Q9UPT5-2;Q9UPT5-5;Q9UPT5-1;Q9UPT5-6;Q9UPT5;A0A0A0MRE1;B4DJ07	Exocyst complex component 7	EXOC7	+	+			25168	30262	33860	42555	52160	41599	42376	42136	10	10	10	20.1	20.1	20.1	78.808	0	46.68	1114900	22563	36	31	24	24	4	4
					A0A096LP51;P49643;P49643-2	P49643-2	+	+	PIPSL	PIPSL	+	+			common -/+ PPase	A0A0A0MSE2	A0A0A0MSE2;E9PF18;Q16836;Q16836-3;Q16836-2;A0A1W2PNM1;A0A0D9SFP2;A0A1W2PQV5;A0A1W2PQC2;A0A1W2PQ78;A0A1W2PRT2;A0A1W2PP40;A0A1W2PQ55	A0A0A0MSE2;E9PF18;Q16836;Q16836-3;Q16836-2;A0A1W2PNM1;A0A0D9SFP2;A0A1W2PQV5;A0A1W2PQC2;A0A1W2PQ78;A0A1W2PRT2	Hydroxyacyl-coenzyme A dehydrogenase, mitochondrial	HADH	+	+			186390	190960	171360	150400	163660	165470	164980	176560	8	8	8	47.3	47.3	47.3	34.594	0	219.63	6616500	173320	15	62	29	29	6	6
					A0A3B3ITS8;F8VNY2;P49642	P49642	+	+	PIAS1;PIAS2	PIAS1	+	+			common -/+ PPase	A0A0A0MSH6	A0A0A0MSH6;Q9H6V9-4;Q9H6V9-3;Q9H6V9;Q9H6V9-2;C9JHU6;C9JUM0;B5MCU4;B5MDU6	A0A0A0MSH6;Q9H6V9-4;Q9H6V9-3;Q9H6V9;Q9H6V9-2;C9JHU6;C9JUM0;B5MCU4;B5MDU6	UPF0554 protein C2orf43	LDAH;C2orf43	+	+			31092	27793	32993	37087	30316	18373	21467	24014	2	2	2	13.8	13.8	13.8	32.7	0.00027824	3.3842	421000	17291	16	3	5	5	1	2
					A8MX49;B5MCT7;C9J2F3;P49593;P49593-2	P49593-2	+	+	PI4KA	PI4KA	+	+			common -/+ PPase	F8W9B8	F8W9B8;A0A0A0MSI8;O00471;G3V377	F8W9B8;A0A0A0MSI8;O00471	Exocyst complex component 5	EXOC5	+	+			20475	17330	17408	15786	19705	19813	20201	20332	4	4	4	12.9	12.9	12.9	74.34	0	19.731	688170	4426.2	37	26	15	15	4	3
					P49591;Q5T5C7	P49591	+	+	PI4K2A	PI4K2A	+	+			common -/+ PPase	A0A0A0MSK5	A0A0A0MSK5;Q5JTV8;H0YDU3;H0YD16;H0Y4R4	A0A0A0MSK5;Q5JTV8	Torsin-1A-interacting protein 1	TOR1AIP1	+	+			142870	125270	112120	179150	85240	60824	73225	72614	7	7	1	27.5	27.5	3	52.406	0	25.884	2727600	71650	27	29	20	20	4	5
					B4DE93;E9PMX3;E9PPR0;E9PPS5;E9PQP1;G3V0I5;H0YD04;P49821;P49821-2	P49821-2	+	+	PHLDB2	PHLDB2	+	+			common -/+ PPase	A0A0A0MSK6	A0A0A0MSK6;Q13017-2;Q13017;G3V444	A0A0A0MSK6;Q13017-2;Q13017	Rho GTPase-activating protein 5	ARHGAP5	+	+			26973	37348	30813	38341	31187	27209	29344	26739	9	9	9	11.5	11.5	11.5	171.68	0	15.218	1021300	2659.9	75	22	26	26	5	7
					A0A1W2PNU4;A0A286YES2;C9J1W9;C9J6W1;C9JF75;F8VYC4;F8W705;J3KQ37;O14715;P0DJD0;P0DJD1;P49792;Q7Z3J3-2;Q99666;Q99666-2	P49792	+	+	PHLDA1	PHLDA1	+	+			common -/+ PPase	S4R3Z2	S4R3Z2;A0A0A0MSS8;Q04828;P42330;S4R3D5;A6NHU4;H0Y804;B4DK69;P42330-2;P17516;P52895	S4R3Z2;A0A0A0MSS8;Q04828;P42330;S4R3D5;A6NHU4	Aldo-keto reductase family 1 member C1;Aldo-keto reductase family 1 member C3	AKR1C3;AKR1C1	+	+			12160	11318	11304	10099	12007	12132	11226	12851	3	3	3	11.7	11.7	11.7	34.339	0	6.247	289190	8601	20	12	8	8	2	2
					D6RC06;D6RD60;D6RE99;D6REP8;P49773	P49773	+	+	PHKG2	PHKG2	+	+			common -/+ PPase	A0A0A0MSY7	A0A0A0MSY7;O00142-6;H3BP77;O00142-5;O00142-2;O00142-3;O00142-4;O00142;J3QL12;H3BV57;J3KS73;J3QRP0	A0A0A0MSY7;O00142-6;H3BP77;O00142-5;O00142-2;O00142-3;O00142-4;O00142	Thymidine kinase 2, mitochondrial	TK2	+	+			11456	16149	16318	12951	18762	19794	22729	20048	3	3	2	15.2	15.2	10.4	33.328	0	5.2715	314490	6197.3	17	8	7	7	1	1
					G3V5E5;H0YJJ8;P49770	P49770	+	+	PHGDH	PHGDH	+	+			common -/+ PPase	Q5T6K7	Q5T6K7;E9PI99;A0A0A0MT00;Q5T6K5;Q13952-6;Q13952-7;Q13952-2;Q13952-5;Q13952-3;Q13952;E9PL11	Q5T6K7;E9PI99;A0A0A0MT00;Q5T6K5;Q13952-6;Q13952-7;Q13952-2;Q13952-5;Q13952-3;Q13952;E9PL11	Nuclear transcription factor Y subunit gamma	NFYC	+	+			21589	25524	20944	25639	18796	14613	21450	19933	2	2	2	18.6	18.6	18.6	14.909	0.0002742	3.2749	364670	52095	7	6	7	7	2	1
					P49761;P49761-1;P49761-3	P49761-3	+	+	PHF6	PHF6	+	+			common -/+ PPase	A0A0A0MT33	A0A0A0MT33;Q9UPN6;Q9UPN6-2	A0A0A0MT33;Q9UPN6;Q9UPN6-2	Protein SCAF8	SCAF8	+	+			19567	18936	22721	19764	18793	19774	20635	22477	1	1	1	1	1	1	148.86	0.00027739	3.3609	236240	5493.8	43	6	4	4	1	1
					A0A087WT95;A0A087X0W7;A0A2R8Y7H3;G3V4F2;P49753;P49753-2;Q86TX2	P49753	+	+	PHF5A	PHF5A	+	+			common -/+ PPase	A0A0A0MT60	A0A0A0MT60;Q5T1M5-2;Q5T1M5;X6RKW4;Q5T1M5-3	A0A0A0MT60;Q5T1M5-2;Q5T1M5	Peptidyl-prolyl cis-trans isomerase;FK506-binding protein 15	FKBP15	+	+			46230	62529	73221	68610	39916	44425	43479	50975	9	9	9	13.4	13.4	13.4	136.27	0	13.827	1200700	13383	57	22	22	22	4	7
					G3V2K7;P49755	P49755	+	+	PHB2	PHB2	+	+			common -/+ PPase	A0A0A0MT83	A0A0A0MT83;P26440-2;P26440;H7C4G6;H0YLC3;H0YKV0;H0YN10;A0A087WVD3	A0A0A0MT83;P26440-2;P26440;H7C4G6	Isovaleryl-CoA dehydrogenase, mitochondrial	IVD	+	+			86167	69336	73148	70646	83965	77168	73549	77412	9	9	9	34.5	34.5	34.5	46.65	0	37.628	3070300	80774	22	47	26	26	7	6
					E9PQU5;P49756;P49756-2;P49756-3	P49756	+	+	PHB	PHB	+	+			common -/+ PPase	A0A0A0MTB8	A0A0A0MTB8;Q8NI36	A0A0A0MTB8;Q8NI36	WD repeat-containing protein 36	WDR36	+	+			120800	140810	158930	140690	110640	93396	108560	101040	13	13	12	22.2	22.2	20.3	99.365	0	25.089	2898900	29511	40	48	43	43	9	10
					B4DIH5;H0YKU5;H0YM03;H0YMC2;P61201;P61201-2	P61201-2	+	+	PGRMC2	PGRMC2	+	+			common -/+ PPase	A0A0A0MTR7	A0A0A0MTR7;A0A0A0MTC1;Q63HN8;Q63HN8-4;Q63HN8-6;Q63HN8-5	A0A0A0MTR7;A0A0A0MTC1;Q63HN8;Q63HN8-4	E3 ubiquitin-protein ligase RNF213	RNF213	+	+			638790	772900	691980	793640	556910	583000	613720	577510	22	22	22	6.1	6.1	6.1	591.4	0	67.023	9144700	26939	274	85	65	65	13	12
					F5GWH5;P61165	P61165	+	+	PIGG	PIGG	+	+			common -/+ PPase	A0A0A0MTE2	A0A0A0MTE2;E9PMT2;F8WD26;J3KP06;Q8WWI1-5;Q8WWI1-4;Q8WWI1-2;Q8WWI1;H0Y424;H0YDG6;H0YE95;H0YDQ3;E9PRJ0	A0A0A0MTE2;E9PMT2;F8WD26;J3KP06;Q8WWI1-5;Q8WWI1-4;Q8WWI1-2;Q8WWI1;H0Y424;H0YDG6	LIM domain only protein 7	LMO7	+	+			47207	46410	39970	39793	33267	36385	28090	28985	9	1	1	11	1.4	1.4	158.2	1	-2	1630100	13494	77	35	22	22	6	4
					A0A1B0GVS3;P61163;R4GMT0	P61163	+	+	PIP5K1A	PIP5K1A	+	+			common -/+ PPase	A0A0A0MTH3	A0A0A0MTH3;Q13418-2;Q13418;Q13418-3;A0A087WWY6	A0A0A0MTH3;Q13418-2;Q13418;Q13418-3	Integrin-linked protein kinase	ILK	+	+			60070	75133	66303	68220	47609	46465	54780	45682	5	5	5	13.9	13.9	13.9	54.611	0	11.705	1996300	63154	24	30	17	17	3	4
					F5H6T1;P61160;P61160-2	P61160-2	+	+	PIP4K2C	PIP4K2C	+	+			common -/+ PPase	A0A0A0MTH9	A0A0A0MTH9;O14981;O14981-2	A0A0A0MTH9;O14981;O14981-2	TATA-binding protein-associated factor 172	BTAF1	+	+			14743	11742	14785	28392	8623.2	10431	13526	9644.3	4	4	4	3.6	3.6	3.6	206.93	0	8.3665	254040	2604.1	85	8	9	9	3	2
					A0A0A0MTI9;B4DXW1;C9IZN3;F8WDR7;H7C4J1;P61158;Q9C0K3;Q9P1U1;Q9P1U1-2;Q9P1U1-3	P61158	+	+	PIP4K2B	PIP4K2B	+	+			common -/+ PPase	A0A0A0MTI6	A0A0A0MTI6;Q9NYP7-3;Q9NYP7;Q9NYP7-2	A0A0A0MTI6;Q9NYP7-3;Q9NYP7;Q9NYP7-2	Elongation of very long chain fatty acids protein;Elongation of very long chain fatty acids protein 5	ELOVL5	+	+			56787	55673	65992	75135	65186	69428	76534	69402	1	1	1	5	5	5	30.742	0	6.4537	783500	71227	11	8	4	4	1	1
					P61106;X6RFL8	P61106	+	+	PIP4K2A	PIP4K2A	+	+			common -/+ PPase	A0A0A0MTN0	A0A0A0MTN0;Q13617;Q13617-2;Q5T2B5;Q5T2B7	A0A0A0MTN0;Q13617;Q13617-2;Q5T2B5	Cullin-2	CUL2	+	+			41406	49895	47326	53031	35653	35278	34959	37060	12	12	12	24.3	24.3	24.3	88.505	0	68.708	2956600	15748	43	80	38	38	9	10
					D6RDM7;P61086;P61086-2;P61086-3	P61086-3	+	+	PIP	PIP	+	+			common -/+ PPase	A0A0A0MTN3	A0A0A0MTN3;P21266	A0A0A0MTN3;P21266	Glutathione S-transferase Mu 3	GSTM3	+	+			17374	11044	11885	8875.6	27451	35393	28871	26398	7	7	7	42.9	42.9	42.9	24.914	0	12.699	725780	2103.5	17	20	16	16	3	4
					P61026	P61026	+	+	PIN1	PIN1	+	+			common -/+ PPase	A0A0A0MTU3	A0A0A0MTU3;U3KPY4;Q4ZIN3-2;Q4ZIN3	A0A0A0MTU3;U3KPY4;Q4ZIN3-2;Q4ZIN3	Membralin	TMEM259	+	+			51337	44358	34213	29175	50353	56392	59801	53342	1	1	1	4.4	4.4	4.4	46.22	0.00053093	2.9375	701570	30133	19	13	4	4	1	1
					P61024;Q5T179;Q9BZU3	P61024	+	+	PMPCB	PMPCB	+	+			common -/+ PPase	A0A0A6YYA0	A0A0A6YYA0;Q86XR7-2;Q9Y3B3-2;Q9Y3B3	A0A0A6YYA0;Q86XR7-2;Q9Y3B3-2;Q9Y3B3	Transmembrane emp24 domain-containing protein 7	TMED7-TICAM2;TMED7	+	+			62688	38041	59904	47495	16511	63790	21067	66649	3	3	3	26.1	26.1	26.1	21.233	0	6.8819	1009600	45953	11	14	8	8	1	1
					F8VPW9;F8VSF8;F8VUA5;F8VWU4;F8VWZ7;F8WCY6;F8WD79;P61020;P61020-2	P61020-2	+	+	PIK3R4	PIK3R4	+	+			common -/+ PPase	A0A0A6YYC0	A0A0A6YYC0;E9PJN1;O75676-2;O75676	A0A0A6YYC0;E9PJN1;O75676-2;O75676	Ribosomal protein S6 kinase;Ribosomal protein S6 kinase alpha-4	RPS6KA4	+	+			14130	20236	31986	21762	13731	18891	13297	17996	4	4	3	7.2	7.2	6.1	78.366	0	8.8765	415020	5097	34	15	11	11	1	3
					H7C125;P61019;P61019-2	P61019-2	+	+	PIH1D1	PIH1D1	+	+			common -/+ PPase	A0A0A6YYH1	A0A0A6YYH1;Q7Z6K5;Q7Z6K5-2	A0A0A6YYH1;Q7Z6K5;Q7Z6K5-2	Arpin	C15orf38-AP3S2;ARPIN	+	+			33369	43020	45030	26582	37991	40123	41680	38276	1	1	1	6.9	6.9	6.9	43.881	0	6.9661	449970	22499	20	7	4	4	1	1
					F5H0C7;F5H1V1;F5H423;F5H6T5;F8WDB3;H0YGG7;P61204;P61204-2;P84077	P61204	+	+	PIGT	PIGT	+	+			common -/+ PPase	A0A0B4J1V8	A0A0B4J1V8;A0A0A6YYI3;Q9NQ55-2;Q9NQ55;Q9NQ55-3;C9J3W3;A8MV53;Q96G91	A0A0B4J1V8;A0A0A6YYI3;Q9NQ55-2;Q9NQ55;Q9NQ55-3;C9J3W3;A8MV53	Suppressor of SWI4 1 homolog	PPAN-P2RY11;PPAN	+	+			338190	311200	392950	219330	426240	421020	319880	369260	4	4	3	11.8	11.8	8.8	87.917	0	6.2985	4184600	3052.5	37	16	13	13	3	3
					P61326;P61326-2	P61326-2	+	+	PIGS	PIGS	+	+			common -/+ PPase	A0A0B4J1W3	A0A0B4J1W3;Q9BXJ9;Q9BXJ9-4;Q6N069-5;Q6N069-4;Q6N069-3;Q6N069-2;Q6N069	A0A0B4J1W3;Q9BXJ9;Q9BXJ9-4	N-alpha-acetyltransferase 15, NatA auxiliary subunit	NAA15	+	+			123700	127880	127620	136260	116580	116560	124110	116520	16	16	16	26.7	26.7	26.7	101.2	0	88.442	7611500	41244	52	120	47	47	15	11
					A0A2R8Y738;A0A2R8YEM3;E7ENU7;E7EQV9;E7EX53;P61313;P61313-2	P61313-2	+	+	PIGR	PIGR	+	+			common -/+ PPase	A0A0B4J1Z1	A0A0B4J1Z1;C9JAB2;Q16629-3;Q16629-2;Q16629-4;Q16629	A0A0B4J1Z1;C9JAB2;Q16629-3;Q16629-2;Q16629-4;Q16629	Serine/arginine-rich splicing factor 7	SRSF7	+	+			244250	224170	237170	226380	222320	246880	223710	267340	6	6	6	50.4	50.4	50.4	15.763	0	29.702	7781300	295110	8	38	22	22	4	4
					A0A087WTV2;B3KQ25;B7Z8D3;K7EJF8;K7EKR3;K7EMD0;K7ENH2;K7EPX6;K7ESG5;K9J957;P61289;P61289-2;P61289-3	P61289-3	+	+	PIGK	PIGK	+	+			common -/+ PPase	A0A0B4J210	A0A0B4J210;Q6PKG0;E5RH50;Q6PKG0-3;H0YC33;H0YBW1;H0YC73	A0A0B4J210;Q6PKG0;E5RH50;Q6PKG0-3	La-related protein 1	LARP1	+	+			48114	59082	43889	26025	59742	59238	39374	32391	7	7	7	14.1	14.1	14.1	90.821	0	15.507	1240000	15286	42	20	10	10	3	5
					E5RHH1;E5RIT6;J3KS10;J3KSS0;J3QQQ9;J3QQV1;J3QRC4;J3QRI7;P61254;Q9UNX3	P61254	+	+	PMVK	PMVK	+	+			common -/+ PPase	A0A0B4J231	A0A0B4J231;P0CG04;B9A064	A0A0B4J231;P0CG04;B9A064	Ig lambda-1 chain C regions;Immunoglobulin lambda-like polypeptide 5	IGLL5;IGLC1	+	+			1244400	1249900	15475	11643	33285	44972	55164	51725	5	5	1	34.4	34.4	8.8	23.15	0	85.625	5514200	260210	13	18	10	10	4	4
					D6R9B6;D6RAS7;D6RAT0;D6RB09;D6RED7;D6RG13;D6RGE0;D6RI02;E9PFI5;H0Y8L7;H0Y9Y4;P61247	P61247	+	+	PPFIBP1	PPFIBP1	+	+			common -/+ PPase	A0A0B4J296	A0A0B4J296;Q15370;Q15370-2;B8ZZU8;I3L0M9	A0A0B4J296;Q15370;Q15370-2;B8ZZU8;I3L0M9	Transcription elongation factor B polypeptide 2	TCEB2	+	+			110750	111920	119900	116160	104390	105760	98037	93330	6	6	6	62.1	62.1	62.1	7.7561	0	14.636	2703200	451380	4	34	14	14	5	3
					D6R9I9;D6RGF4;H0Y990;P61221	P61221	+	+	PPFIA1	PPFIA1	+	+			common -/+ PPase	A0A0B4J2A0	A0A0B4J2A0;Q9UHJ6	A0A0B4J2A0;Q9UHJ6	Sedoheptulokinase	TRPV1;SHPK	+	+			13044	12068	11862	8329.6	14835	14508	16094	16253	3	3	3	11.9	11.9	11.9	51.504	0	9.4924	216670	2030.3	21	5	8	8	1	1
					A0A075B6Q0;A6NIZ1;B7ZB78;E7ESV4;F5GWU8;F5GX62;F5GYB5;F5GYH7;F5GZG1;F5H004;F5H077;F5H0B7;F5H491;F5H4H0;F5H500;F5H6R7;F5H7Y6;F5H823;F8WBC0;P61224;P61224-2;P61224-3;P61224-4;P62834	P61224	+	+	PPCS	PPCS	+	+			common -/+ PPase	P42765	P42765;A0A0B4J2A4;K7EME0	P42765;A0A0B4J2A4;K7EME0	3-ketoacyl-CoA thiolase, mitochondrial	ACAA2	+	+			33908	40384	43405	39549	46000	44691	39114	35910	6	6	6	31.7	31.7	31.7	41.924	0	17.715	1334900	10794	21	29	21	21	6	6
					F6U784;P10114;P61225	P61225	+	+	PPAT	PPAT	+	+			common -/+ PPase	Q5W0H4	Q5W0H4;A0A0B4J2C3;P13693;J3KPG2;E9PJF7;P13693-2;Q56UQ5	Q5W0H4;A0A0B4J2C3;P13693	Translationally-controlled tumor protein	TPT1	+	+			257380	310930	265450	277620	434540	479710	404490	376250	6	6	6	21.8	21.8	21.8	21.525	0	141.2	19268000	454360	7	78	23	23	6	6
					K7ELC7;K7EQQ9;K7ERY7;P61353	P61353	+	+	PPAN;PPAN-P2RY11	PPAN-P2RY11	+	+			common -/+ PPase	A0A0B4J2E5	A0A0B4J2E5;Q15269;C9J544;A0A0J9YX21	A0A0B4J2E5;Q15269	Periodic tryptophan protein 2 homolog	PWP2	+	+			69319	70743	92798	87516	63539	62617	60468	62640	9	9	8	15.8	15.8	14.4	102.45	0	18.695	2158800	43206	39	30	23	23	5	4
					M0R0X1;P61018;P61018-2	P61018-2	+	+	PPA2	PPA2	+	+			common -/+ PPase	G3V267	G3V267;G3V5T0;A0A0C4DFM0;O43708;A0A0A0MR33;G3V4T6;O43708-2;O43708-3;H0YJN8;G3V3B9	G3V267;G3V5T0;A0A0C4DFM0;O43708;A0A0A0MR33;G3V4T6;O43708-2;O43708-3	Maleylacetoacetate isomerase	GSTZ1	+	+			46486	55492	41977	51091	49979	56741	57851	49685	3	3	3	26.5	26.5	26.5	21.074	0	12.375	958030	101480	8	11	8	8	3	2
					E7EMV8;J3KS25;J3KS93;J3KSN7;J3KSZ0;J3KT04;J3KT12;J3KTB5;J3KTN0;J3QKZ9;J3QL43;J3QL52;J3QLN6;J3QQP0;J3QR64;J3QS69;P60842;P60842-2	P60842-2	+	+	PPA1	PPA1	+	+			common -/+ PPase	A0A0C4DFM1	A0A0C4DFM1;Q92544	A0A0C4DFM1;Q92544	Transmembrane 9 superfamily member 4	TM9SF4	+	+			44702	70884	51618	55022	67374	66518	57592	57507	2	2	2	5.3	5.3	5.3	72.54	0	6.111	1238000	25208	22	10	8	8	1	2
					A0A2R8Y793;A0A2R8YEA7;A0A2R8YFE2;A0A2R8YGF8;A5A3E0;C9JTX5;C9JUM1;C9JZR7;E7EVS6;F8WCH0;G5E9R0;P60709;Q6S8J3	P60709	+	+	POU2F1	POU2F1	+	+			common -/+ PPase	A0A0C4DFN3	A0A0C4DFN3;Q99685;H7C4E0;A0A3B3ITT3;E7EWX8;Q99685-2;H7C599;H7C5K5;C9J8Q3	A0A0C4DFN3;Q99685;H7C4E0;A0A3B3ITT3;E7EWX8;Q99685-2;H7C599	Monoglyceride lipase	MGLL	+	+			27470	19751	18561	9852.5	30125	26500	27868	27062	5	5	5	28.4	28.4	28.4	34.292	0	7.3261	703120	34865	16	15	14	14	1	3
					B7Z6Z4;F8VPF3;F8W1I5;F8W1R7;G3V1V0;G3V1Y7;H0YI43;J3KND3;P14649;P60660	P60660	+	+	POTEKP	POTEKP	+	+			common -/+ PPase	Q12959-2	Q12959-2;Q12959-4;E7EQD7;A0A0C4DFT3;Q12959;Q12959-7;Q12959-6;Q12959-3;Q12959-5;Q12959-9;Q12959-8;F2Z2L0;B4E2H8;A8MUT6;C9JCP6;C9JN61;C9JUA9;C9J110	Q12959-2;Q12959-4;E7EQD7;A0A0C4DFT3;Q12959;Q12959-7;Q12959-6;Q12959-3;Q12959-5;Q12959-9;Q12959-8	Disks large homolog 1	DLG1	+	+			65651	55289	51035	56235	64061	65292	66100	65255	3	3	3	5	5	5	103.32	0	24.961	980940	26512	37	17	9	9	2	2
					H3BPN5;H3BTA2;H3BV22;H3BVE3;I3L4X0;P60510	P60510	+	+	POTEI	POTEI	+	+			common -/+ PPase	A0A0C4DFV9	A0A0C4DFV9;Q01105-3;Q01105-4;Q01105-2;Q01105;A0A087X027;P0DME0	A0A0C4DFV9;Q01105-3;Q01105-4;Q01105-2;Q01105	Protein SET	SET	+	+			357260	364410	336910	348570	488370	487780	461720	477220	10	10	10	31.6	31.6	31.6	31.124	0	175.79	9919300	167560	8	75	36	36	10	9
					E5RGA2;E5RHS5;E5RII3;E5RIP5;E5RIT4;E5RJ25;H0YAW4;H0YBP5;H0YBR5;P60228	P60228	+	+	POR	POR	+	+			common -/+ PPase	A0A0C4DFX9	A0A0C4DFX9;Q9H3P2;H0Y3X6;Q9H3P2-7;H7C2C7;C9JHL4;F8W954;F8WF98;H7C2M8;C9JEM7	A0A0C4DFX9;Q9H3P2;H0Y3X6;Q9H3P2-7	Negative elongation factor A	NELFA	+	+			50485	73256	63190	82986	47596	46916	62151	61782	6	6	6	24.3	24.3	24.3	58.499	0	37.9	1202800	44416	22	26	17	17	5	3
					P60174;P60174-1;P60174-4;U3KPS5;U3KPZ0;U3KQF3	P60174-4	+	+	PPIA	PPIA	+	+			common -/+ PPase	A0A0C4DFZ2	A0A0C4DFZ2;P15289-2;P15289	A0A0C4DFZ2;P15289-2;P15289	Arylsulfatase A;Arylsulfatase A component B;Arylsulfatase A component C	ARSA	+	+			12838	14159	10953	13810	15189	10997	11538	11838	3	3	3	8.6	8.6	8.6	53.806	0.0019945	2.3665	207530	2286.6	17	4	7	7	3	3
					E5RIP1;E5RJX2;G3XAN0;P60866;P60866-2	P60866	+	+	PPIB	PPIB	+	+			common -/+ PPase	A0A0C4DG07	A0A0C4DG07;O60934	A0A0C4DG07;O60934	Nibrin	NBN	+	+			15602	12821	14338	15879	16455	12831	13259	12317	3	3	3	10.9	10.9	10.9	75.968	0	8.0201	328700	2240.9	37	12	10	10	2	1
					A0A0A6YYG9;F8WCF6;F8WDD7;F8WDW3;F8WE39;H7C0A3;P59998;P59998-2;P59998-3;P59998-4;R4GN08	P59998-4	+	+	PPOX	PPOX	+	+			common -/+ PPase	C9J9K3	C9J9K3;A0A0C4DG17;P08865;F8WD59	C9J9K3;A0A0C4DG17;P08865;F8WD59	40S ribosomal protein SA	RPSA	+	+			1592100	1589200	1645200	1839500	1577100	1616000	1543500	1483700	18	18	17	66.9	66.9	66.9	29.404	0	323.31	66703000	2872000	13	170	66	66	15	16
					A0A2R8YDI9;A0A2R8YFB8;E7END7;G3V196;H0YL94;H0YLJ8;H0YMN7;P59190;P59190-2;P61006-2;P62820;P62820-2;P62820-3	P59190-2	+	+	PPME1	PPME1	+	+			common -/+ PPase	E7EUA1	E7EUA1;F8WAU3;F8WCD7;F8WAZ8;F8WBL5;F8WEB9;E9PEZ7;E7EW77;E7EP65;A0A0C4DG21;F8WAL6;Q9NYB9-2;Q9NYB9-4;Q9NYB9	E7EUA1;F8WAU3;F8WCD7;F8WAZ8;F8WBL5;F8WEB9;E9PEZ7;E7EW77;E7EP65;A0A0C4DG21;F8WAL6;Q9NYB9-2;Q9NYB9-4;Q9NYB9	Abl interactor 2	ABI2	+	+			15865	10483	17457	20463	12005	9598.8	11628	10816	1	1	1	25	25	25	5.1787	0.0049798	1.8956	151260	50419	3	6	4	4	1	1
					G3V480;G3V4F7;P61011;P61011-2	P61011-2	+	+	PPM1G	PPM1G	+	+			common -/+ PPase	A0A0C4DG44	A0A0C4DG44;O43464-3;O43464;O43464-2;O43464-4;P83110-2;P83110	A0A0C4DG44;O43464-3;O43464;O43464-2;O43464-4	Serine protease HTRA2, mitochondrial	HTRA2	+	+			63076	52664	49860	32864	58631	57309	63118	64948	9	9	9	41.8	41.8	41.8	45.112	0	21.25	2591300	39846	21	42	28	28	5	7
					P61006	P61006	+	+	PPM1F	PPM1F	+	+			common -/+ PPase	F5GYV5	F5GYV5;H7BZV4;A0A0C4DG62;F8WCT1;Q66PJ3-7;Q66PJ3-4;Q66PJ3-3;Q66PJ3-2;Q66PJ3;F8WEP2;A0A0C4DH18;Q66PJ3-5;F5H7X4	F5GYV5;H7BZV4;A0A0C4DG62;F8WCT1;Q66PJ3-7;Q66PJ3-4;Q66PJ3-3;Q66PJ3-2;Q66PJ3;F8WEP2;A0A0C4DH18;Q66PJ3-5	ADP-ribosylation factor-like protein 6-interacting protein 4	ARL6IP4	+	+			14735	10331	14369	13707	14475	12956	12390	10897	3	3	3	15.2	15.2	15.2	23.687	0	5.4129	311980	25337	8	13	10	10	2	1
					F6RFD5;P60981;P60981-2	P60981-2	+	+	PPM1B	PPM1B	+	+			common -/+ PPase	A0A0C4DG89	A0A0C4DG89;D6RJA6	A0A0C4DG89		DDX46	+	+	1	804	249370	248170	236950	230350	175940	187340	201830	194610	19	19	1	25	25	1.9	117.46	0	138.3	9799100	112640	53	134	67	67	15	14
					P60953;P60953-1;Q5JYX0	P60953-1	+	+	PPIP5K2	PPIP5K2	+	+			common -/+ PPase	A0A0C4DGA2	A0A0C4DGA2;O75521-2;O75521;F1LLU7;F8WAW4;C9JB63;F8W6J1	A0A0C4DGA2;O75521-2;O75521;F1LLU7;F8WAW4;C9JB63	Enoyl-CoA delta isomerase 2, mitochondrial	ECI2	+	+			51020	34763	58181	49634	66367	69981	56823	61737	6	6	6	22	22	22	40.183	0	35.221	1887200	86787	17	31	19	19	3	2
					A0A0B4J207;A0A2R8Y7H4;B1ALA7;B1ALA9;B7ZB02;P21108;P60891;P60891-2;Q15244	P60891	+	+	PPIL3	PPIL3	+	+			common -/+ PPase	A0A0C4DGA6	A0A0C4DGA6;Q14527;Q14527-2;H7C5K0	A0A0C4DGA6;Q14527;Q14527-2	Helicase-like transcription factor	HLTF	+	+			23478	19719	26335	17896	23158	22781	23326	22756	7	7	7	13.3	13.3	13.3	113.86	0	22.945	723680	4039.6	55	25	17	17	4	3
					G3V295;G3V2S7;G3V3I1;G3V3U4;G3V4S5;G3V5Z7;H0YJC4;P60900;P60900-2;P60900-3	P60900	+	+	PPIL1	PPIL1	+	+			common -/+ PPase	A0A0C4DGB5	A0A0C4DGB5;P20810-6;P20810-2;E7ES10;B7Z574;E9PCH5;P20810-4;P20810-8;E7EVY3;P20810;P20810-9;P20810-5;P20810-10;P20810-7;P20810-3;H0Y7F0;H0Y9H6;E9PDE4;E7EQ12;H0YD33;E7EQA0;F8W7E0;A0A0A0MR45;D6RGF7;D6RBR1;E7EN75;H0Y944;E9PSG1	A0A0C4DGB5;P20810-6;P20810-2;E7ES10;B7Z574;E9PCH5;P20810-4;P20810-8;E7EVY3;P20810;P20810-9;P20810-5;P20810-10;P20810-7;P20810-3;H0Y7F0;H0Y9H6;E9PDE4	Calpastatin	CAST	+	+			54980	47434	46302	45302	41557	38177	36985	44408	7	7	6	14.9	14.9	13.8	80.998	0	16.646	1545700	868.89	37	20	24	24	6	6
					P60903	P60903	+	+	PPIH	PPIH	+	+			common -/+ PPase	A0A0C4DGG1	A0A0C4DGG1;Q9UKS6;E9PIY1;E9PJ33;E9PJ75;E9PNM9	A0A0C4DGG1;Q9UKS6;E9PIY1	Protein kinase C and casein kinase substrate in neurons protein 3	PACSIN3	+	+			13959	15096	21003	17648	32454	32022	28122	26372	3	3	3	9.6	9.6	9.6	46.494	0	4.9422	485110	23045	20	9	9	9	2	2
					O60814;P57053;P58876;P62807;Q5QNW6;Q5QNW6-2;Q93079;Q96A08;Q99877;Q99879;U3KQK0	P58876	+	+	PPIF	PPIF	+	+			common -/+ PPase	Q14839-2	Q14839-2;A0A2R8Y425;Q14839;A0A0C4DGG9;A0A2R8Y521;A0A2R8Y212;F5GWX5;A0A2R8Y4X2;A0A2R8YFD8;A0A2U3TZM0;A0A2R8YD40;A0A2R8YDJ9;A0A2R8YFK9;A0A2R8Y5J0;A0A2R8YDW2;A0A2R8YER1;A0A2R8Y445;A0A2R8Y8C1;A0A2R8Y5Z7;A0A2R8Y685;A0A2R8Y7I0;A0A2R8Y7M9;A0A2R8Y8B3;A0A2R8YE38;A0A2R8Y5M9;H7C3H7	Q14839-2;A0A2R8Y425;Q14839;A0A0C4DGG9;A0A2R8Y521;A0A2R8Y212;F5GWX5;A0A2R8Y4X2;A0A2R8YFD8;A0A2U3TZM0;A0A2R8YD40;A0A2R8YDJ9;A0A2R8YFK9;A0A2R8Y5J0;A0A2R8YDW2;A0A2R8YER1;A0A2R8Y445;A0A2R8Y8C1;A0A2R8Y5Z7;A0A2R8Y685;A0A2R8Y7I0;A0A2R8Y7M9	Chromodomain-helicase-DNA-binding protein 4	CHD4	+	+			48726	53499	50942	51487	43841	48258	49206	46789	12	12	7	8.8	8.8	5.9	220.85	0	58.112	3085400	12664	88	61	42	42	10	10
					F5GYQ1;H3BQJ1;J3QL14;P61421;R4GN72	P61421	+	+	PPIE	PPIE	+	+			common -/+ PPase	A0A0C4DGL3	A0A0C4DGL3;H0YNW5;P33316-2;P33316;H0YKC5;H0YMM5;H0YNJ9;H0YKI0;H0YMP1	A0A0C4DGL3;H0YNW5;P33316-2;P33316;H0YKC5;H0YMM5;H0YNJ9;H0YKI0;H0YMP1	Deoxyuridine 5-triphosphate nucleotidohydrolase, mitochondrial	DUT	+	+			200400	343840	294610	347240	307110	242150	327030	274910	6	6	6	63.8	63.8	63.8	15.395	0	60.768	9229600	659080	8	44	20	20	5	5
					A8MWD9;F5H013;P62308;Q49AN9	P62308	+	+	PPIC	PPIC	+	+			common -/+ PPase	J3QRU8	J3QRU8;A0A0C4DGN6;Q9Y2X7;Q9Y2X7-3	J3QRU8;A0A0C4DGN6;Q9Y2X7;Q9Y2X7-3	ARF GTPase-activating protein GIT1	GIT1	+	+			11238	7716.5	11185	7846.5	11671	10993	12218	12052	2	2	2	2.2	2.2	2.2	76.805	0	6.0082	156280	3557.1	36	10	8	8	1	1
					A6NHK2;P62304	P62304	+	+	POP7	POP7	+	+			common -/+ PPase	K7ERR9	K7ERR9;K7ERY9;K7EKG3;K7EKU5;A0A0C4DGQ7;C9JRL6;K7EIK7;O95834;O95834-2;O95834-3	K7ERR9;K7ERY9;K7EKG3;K7EKU5;A0A0C4DGQ7;C9JRL6;K7EIK7;O95834;O95834-2;O95834-3	Echinoderm microtubule-associated protein-like 2	EML2	+	+			5945.5	4351.9	5476.7	5138.6	10903	8362.2	8212.7	6547.4	1	1	1	22	22	22	10.051	0	6.5833	83848	16770	5	3	4	4	1	1
					M0QZC5;M0R1H5;M0R1H6;P62280	P62280	+	+	PON2	PON2	+	+			common -/+ PPase	A0A0C4DGS1	A0A0C4DGS1;P39656-3;P39656;P39656-2;U3KQ84	A0A0C4DGS1;P39656-3;P39656;P39656-2	Dolichyl-diphosphooligosaccharide--protein glycosyltransferase 48 kDa subunit	DDOST	+	+			235210	234830	240750	243560	197150	197530	187620	185410	15	15	15	51.9	51.9	51.9	48.799	0	323.31	14685000	417630	23	115	58	58	15	15
					E9PS50;J3KMX5;P62277	P62277	+	+	POLDIP2	POLDIP2	+	+			common -/+ PPase	Q643R3	Q643R3;A0A0C4DGT4;H3BMK4	Q643R3;A0A0C4DGT4	Lysophospholipid acyltransferase LPCAT4	LPCAT4	+	+			12353	10849	15068	11825	13869	14209	15600	17176	3	3	3	9.4	9.4	9.4	57.218	0	7.631	252680	958.65	21	11	7	7	1	3
					A0A0G2JQH2;J3JS69;P62269;Q5GGW2	P62269	+	+	POLD3	POLD3	+	+			common -/+ PPase	A0A0C4DGV4	A0A0C4DGV4;R4GMU8;E9PLX3;O43504	A0A0C4DGV4;R4GMU8;E9PLX3;O43504	Ragulator complex protein LAMTOR5	LAMTOR5	+	+			50727	48032	29911	47853	21280	25315	13901	16161	2	2	2	23.1	23.1	23.1	18.158	0.0083391	1.7012	393800	30761	10	7	6	6	1	1
					D6R9I7;D6RD47;D6RDJ2;D6RIX0;P62266	P62266	+	+	POLD2	POLD2	+	+			common -/+ PPase	A0A0C4DGW6	A0A0C4DGW6;A6NDU8	A0A0C4DGW6;A6NDU8	UPF0600 protein C5orf51	C5orf51	+	+			52800	58903	46867	42681	43251	51332	50003	43709	3	3	3	38.8	38.8	38.8	16.961	0	25.708	847140	16824	8	16	10	10	3	2
					A0A2R8Y811;E5RH77;P62263	P62263	+	+	POLD1	POLD1	+	+			common -/+ PPase	A0A0C4DGX4	A0A0C4DGX4;Q13616	A0A0C4DGX4;Q13616	Cullin-1	CUL1	+	+			24825	27811	24672	21143	26635	24641	26825	29959	7	7	7	17.4	17.4	17.4	87.387	0	31.175	1139000	8245.6	44	31	23	23	6	3
					B4DJF2;I3L0W5;I3L3T1;K7EIT4;K7EM20;P62258;P62258-2	P62258-2	+	+	POLA2	POLA2	+	+			common -/+ PPase	A0A0C4DGX8	A0A0C4DGX8;Q15904	A0A0C4DGX8;Q15904	V-type proton ATPase subunit S1	ATP6AP1	+	+			31174	27821	28412	37720	23002	20973	29062	30734	2	2	2	15.7	15.7	15.7	31.61	0	5.2465	475250	12186	12	9	7	7	2	2
					I3L0Q0;I3L2Q4;P62253	P62253	+	+	POLA1	POLA1	+	+			common -/+ PPase	A0A0C4DH65	A0A0C4DH65;A5PL33-3;A5PL33-2;A5PL33	A0A0C4DH65;A5PL33-3;A5PL33-2;A5PL33	Protein KRBA1	KRBA1	+	+			593830	529180	550720	156620	64958	73655	56857	6077.9	2	2	2	2.6	2.6	2.6	111.74	0.006771	1.7638	3024300	64347	47	4	6	6	1	1
					M0QX76;M0R1M5;M0R210;M0R3H0;P62249;Q6IPX4	P62249	+	+	POFUT1	POFUT1	+	+			common -/+ PPase	P21127	P21127;P21127-3;A0A0D9SEN2;A0A0D9SER5;P21127-5;P21127-10;P21127-6;A0A0D9SEI3;P21127-8;P21127-9;P21127-2;Q5QPR4;Q5QPR3;Q9UQ88;Q9UQ88-2;Q9UQ88-3;Q9UQ88-4;P21127-4;P21127-12;Q9UQ88-5;Q9UQ88-10;Q9UQ88-8;Q9UQ88-9;E7ESP2;J3KS35	P21127;P21127-3;A0A0D9SEN2;A0A0D9SER5;P21127-5;P21127-10;P21127-6;A0A0D9SEI3;P21127-8;P21127-9;P21127-2;Q5QPR4;Q5QPR3;Q9UQ88;Q9UQ88-2;Q9UQ88-3;Q9UQ88-4;P21127-4;P21127-12;Q9UQ88-5;Q9UQ88-10;Q9UQ88-8	Cyclin-dependent kinase 11B;Cyclin-dependent kinase 11A	CDK11B;CDK11A	+	+			34814	29652	41339	31500	30164	35769	30785	29527	6	6	6	10.2	10.2	10.2	92.619	0	13.111	625450	12052	39	13	10	10	2	1
					H3BVC7;I3L3P7;P62244	P62244	+	+	PNPT1	PNPT1	+	+			common -/+ PPase	A0A0D9SEM4	A0A0D9SEM4;Q08170;B4DJK0;B4DUA4	A0A0D9SEM4;Q08170	Serine/arginine-rich splicing factor 4	SRSF4	+	+			381520	251970	312900	331240	265360	274500	272250	282890	3	2	2	6.6	4.2	4.2	43.647	0	4.638	3670600	311240	11	19	11	11	2	2
					P62241;Q5JR95	P62241	+	+	PNPO	PNPO	+	+			common -/+ PPase	A0A0D9SEU5	A0A0D9SEU5;R4GMX8;Q6VN20-2;Q6VN20-3;Q6VN20	A0A0D9SEU5;R4GMX8;Q6VN20-2;Q6VN20-3;Q6VN20	Ran-binding protein 10	RANBP10	+	+			28758	24123	25364	14022	16227	15784	21890	20536	1	1	1	2.7	2.7	2.7	67.255	0.0015186	2.4732	235620	11781	20	8	4	4	1	1
					J3KRP2;J3KTQ9;J3QLH6;J3QQM1;J3QRR3;J3QRW1;J3QSA9;J3QSE0;P62195;P62195-2	P62195-2	+	+	PNP	PNP	+	+			common -/+ PPase	O00571	O00571;A0A0D9SF53;A0A2R8Y4A4;A0A2R8YFS5;A0A0D9SG12;A0A0D9SFB3;A0A2R8YF78;A0A2R8YCW1;O00571-2;A0A2R8Y645;A0A2U3TZJ9;A0A2R8YDT5;A0A2R8Y7T2;A0A2R8YFR4;A0A2R8Y5G6;F6S8Q4;A0A2R8YDH3;A0A0J9YVQ7;A0A087WVZ1;A0A087WX09;A0A2R8Y650;A0A2R8YCU0;A0A2R8Y770	O00571;A0A0D9SF53;A0A2R8Y4A4;A0A2R8YFS5;A0A0D9SG12;A0A0D9SFB3;A0A2R8YF78;A0A2R8YCW1;O00571-2;A0A2R8Y645;A0A2U3TZJ9;A0A2R8YDT5;A0A2R8Y7T2;A0A2R8YFR4;A0A2R8Y5G6;F6S8Q4;A0A2R8YDH3	ATP-dependent RNA helicase DDX3X	DDX3X	+	+			383780	384410	365210	392920	354680	373940	388850	373250	29	29	9	44.1	44.1	20.8	73.243	0	323.31	29825000	328860	39	214	98	98	24	25
					P62191;P62191-2	P62191-2	+	+	PNN	PNN	+	+			common -/+ PPase	A0A0D9SF63	A0A0D9SF63;Q9BZK7;A0A1B0GVH3;C9JCW4;C9JTW8;C9JY82;C9JEC9;C9J3H2;C9J903;A0A0D9SEW5;A0A0D9SFS8;C9J7E1;A0A1B0GUU2;F8W9D8;C9IYU9	A0A0D9SF63;Q9BZK7	F-box-like/WD repeat-containing protein TBL1XR1	TBL1XR1	+	+			47238	56921	52922	52152	60236	53401	59559	40610	5	5	5	19.4	19.4	19.4	51.556	0	22.882	1644600	49002	20	30	18	18	4	4
					P62310	P62310	+	+	PNMA2	PNMA2	+	+			common -/+ PPase	A0A0D9SF70	A0A0D9SF70;G5E9L0;Q8N6H7;Q8N6H7-3;Q8N6H7-2;H0YDN9;E9PQP3;E9PMR9;E9PM63;H0YF45;H0YDX1;E9PMU9;E9PJT7;E9PK28;E9PN48;E9PIY6	A0A0D9SF70;G5E9L0;Q8N6H7;Q8N6H7-3;Q8N6H7-2;H0YDN9;E9PQP3	ADP-ribosylation factor GTPase-activating protein 2	ARFGAP2	+	+			49754	77475	59574	31961	51051	32898	49807	1521.8	4	4	4	23.9	23.9	23.9	42.153	0	14.7	706680	8215.4	23	11	11	11	2	3
					J3QLI9;J3QLR7;P62314	P62314	+	+	POLE3	POLE3	+	+			common -/+ PPase	A0A0U1RQP1	A0A0U1RQP1;A0A0D9SFE4;Q05193-3;Q05193;A0A0D9SFB1;Q05193-5;Q05193-2;A0A1B0GU67;A0A1B0GUX5	A0A0U1RQP1;A0A0D9SFE4;Q05193-3;Q05193;A0A0D9SFB1;Q05193-5;Q05193-2;A0A1B0GU67;A0A1B0GUX5	Dynamin-1	DNM1	+	+			48393	59384	64555	61270	59304	64011	63604	64651	12	9	7	18.2	14.6	12.7	96.396	0	20.029	3328900	26004	46	64	39	39	10	9
					A2A3R5;A2A3R7;P62753	P62753	+	+	POLE4	POLE4	+	+			common -/+ PPase	A0A1B0GW76	A0A1B0GW76;A0A1B0GWF2;A0A1B0GVQ5;A0A2R8Y5D4;A0A0D9SG72;A0A1B0GTP9;P61764;P61764-2;A0A0D9SFQ7;A0A0D9SFW6;A0A096LP33;A0A0D9SEP9;A0A0D9SEH5	A0A1B0GW76;A0A1B0GWF2;A0A1B0GVQ5;A0A2R8Y5D4;A0A0D9SG72;A0A1B0GTP9;P61764;P61764-2;A0A0D9SFQ7;A0A0D9SFW6	Syntaxin-binding protein 1	STXBP1	+	+			65671	62693	73405	78617	59306	56255	54782	72576	3	3	3	25.3	25.3	25.3	41.265	0	19.059	1195400	2861	17	11	8	8	1	2
					A8MUS3;H7BY10;K7EJV9;K7EMA7;K7ERT8;P62750	P62750	+	+	POMP	POMP	+	+			common -/+ PPase	A0A0D9SG77	A0A0D9SG77;A0A1B0GVL3;Q05086-2;Q05086-3;Q05086;A0A0D9SF91;A0A0D9SG63;A0A0D9SES7;S4R306	A0A0D9SG77;A0A1B0GVL3;Q05086-2;Q05086-3;Q05086	Ubiquitin-protein ligase E3A	UBE3A	+	+			49834	55281	56168	54225	38972	36620	48656	42206	9	9	9	18.2	18.2	18.2	88.082	0	62.767	2337700	43421	35	45	31	31	6	7
					A6NL76;B8ZZJ2;C9JFL5;F6QUT6;F6UVQ4;F8WB63;P62736;P63267;P63267-2;P68032;P68133	P62736	+	+	POMK	POMK	+	+			common -/+ PPase	A0A0D9SG79	A0A0D9SG79;Q9NZ09-2;Q9NZ09;Q9NZ09-3;Q9NZ09-4	A0A0D9SG79;Q9NZ09-2;Q9NZ09;Q9NZ09-3;Q9NZ09-4	Ubiquitin-associated protein 1	UBAP1	+	+			17813	33359	26791	20862	23633	23310	25837	23544	1	1	1	3.4	3.4	3.4	57.854	0	4.9483	282590	11774	24	7	4	4	1	1
					E5RFI3;E5RHC1;E5RHP4;E7ESG8;H0YBN9;H0YC23;P62714;P67775;P67775-2	P62714	+	+	POLRMT	POLRMT	+	+			common -/+ PPase	A0A0D9SGE8	A0A0D9SGE8;Q8IWS0-5;Q8IWS0-3;Q8IWS0;Q5JRC6;Q8IWS0-4;Q8IWS0-2	A0A0D9SGE8;Q8IWS0-5;Q8IWS0-3;Q8IWS0;Q5JRC6;Q8IWS0-4;Q8IWS0-2	PHD finger protein 6	PHF6	+	+			12245	18405	18474	12704	9907	9103.2	11183	10095	2	2	2	9.6	9.6	9.6	41.361	0.00030656	4.4437	230220	2254.5	21	10	6	6	1	2
					P62701	P62701	+	+	POLR3C	POLR3C	+	+			common -/+ PPase	A0A0D9SGF6	A0A0D9SGF6;Q13813;Q13813-2;A0A0D9SF54;Q13813-3;A0A1B0GTB7;A0A0D9SFH4;A0A0D9SFF6	A0A0D9SGF6;Q13813;Q13813-2;A0A0D9SF54;Q13813-3	Spectrin alpha chain, non-erythrocytic 1	SPTAN1	+	+			76531	79383	93634	94010	129220	126820	117140	112210	41	41	41	26	26	26	287.6	0	323.31	15556000	31592	145	211	132	132	24	25
					B7Z7P8;D6RCB3;D6RJE8;I3L492;P62495;P62495-2	P62495-2	+	+	POLR2H	POLR2H	+	+			common -/+ PPase	A0A140T8Z0	A0A140T8Z0;A0A0G2JH68;O60610-2;O60610-3;O60610;H9KV28;A0A2R8Y5N1;B4E2I7;A0A2R8YEF8;H7C2W8	A0A140T8Z0;A0A0G2JH68;O60610-2;O60610-3;O60610;H9KV28;A0A2R8Y5N1	Protein diaphanous homolog 1	DIAPH1	+	+			97673	100940	105410	91457	91809	95354	100190	102300	26	26	26	29.9	29.9	29.9	140.3	0	317.01	10380000	45824	59	175	85	85	19	23
					B4DQU5;H3BMH2;H3BN38;H3BSC1;P62491;P62491-2	P62491-2	+	+	POLR2C	POLR2C	+	+			common -/+ PPase	A0A0G2JHC2	A0A0G2JHC2;Q6NYC8-2;Q6NYC8;Q6NYC8-3	A0A0G2JHC2;Q6NYC8-2;Q6NYC8;Q6NYC8-3	Phostensin	PPP1R18	+	+			19248	26783	25734	17910	16576	15966	18196	18190	2	2	2	5.2	5.2	5.2	68.041	0.00029586	3.9932	299190	7492.5	28	10	6	6	2	1
					K7EJB5;K7ERG4;P62316;P62316-2	P62316	+	+	POLR2B	POLR2B	+	+			common -/+ PPase	A0A0G2JIW1	A0A0G2JIW1;P0DMV9;P0DMV8;P0DMV8-2;V9GZ37	A0A0G2JIW1;P0DMV9;P0DMV8;P0DMV8-2;V9GZ37	Heat shock 70 kDa protein 1B;Heat shock 70 kDa protein 1A	HSPA1B;HSPA1A	+	+			2142200	2190300	2151300	2268800	1743600	1823600	1741800	1795500	30	28	20	49.2	47.2	35.8	70.108	0	190	87355000	1721100	32	274	105	105	28	26
					P62318;P62318-2	P62318	+	+	POLR2A	POLR2A	+	+			common -/+ PPase	P46379	P46379;A0A0G2JK23;P46379-3;P46379-2;P46379-5;P46379-4;A0A024RCR6;A0A0G2JL47;F6S6P2;X6REW1;A0A0G2JJM1;H0Y4L1;H0Y710;A0A0G2JJR8;F6VEM6;F6X9W3;F6U341;F6UR09;A0A1B0GX79;F6XTU0;F6U1F2;F6WML8	P46379;A0A0G2JK23;P46379-3;P46379-2;P46379-5;P46379-4;A0A024RCR6;A0A0G2JL47	Large proline-rich protein BAG6	BAG6;BAT3	+	+			99564	117000	113990	103880	78961	81365	79823	69467	10	10	9	13.7	13.7	12.8	119.41	0	96.574	3087400	64476	33	56	28	28	5	6
					A0A087X2I1;H0YJC0;H0YJE9;H0YJS8;H0YJT1;H0YJX2;P62333	P62333	+	+	POLR1C	POLR1C	+	+			common -/+ PPase	A0A0G2JNZ5	A0A0G2JNZ5;A0A0G2JLB3;P04062-4;P04062-2;P04062;A0A0G2JNZ0;P04062-5;P04062-3	A0A0G2JNZ5;A0A0G2JLB3;P04062-4;P04062-2;P04062;A0A0G2JNZ0;P04062-5;P04062-3	Glucosylceramidase	GBA	+	+			92110	81182	77970	84028	37316	30594	52052	59447	5	5	5	22.9	22.9	22.9	50.263	0	22.137	1441700	24897	25	14	13	13	3	4
					P62424;Q5T8U2;Q5T8U3	P62424	+	+	POLR1B	POLR1B	+	+			common -/+ PPase	A0A0G2JMB2	A0A0G2JMB2;A0A286YEY5;P01877	A0A0G2JMB2;A0A286YEY5;P01877	Ig alpha-2 chain C region	IGHA2	+	+			894880	946360	94706	98830	252630	152050	255870	351300	7	1	1	33.5	4.4	4.4	36.508	0.005863	1.8073	5726700	299570	15	31	11	11	7	6
					C9J9S3;C9JP48;E7ETD8;P62140	P62140	+	+	POLR1A	POLR1A	+	+			common -/+ PPase	A0A0G2JNZ2	A0A0G2JNZ2;A0A0G2JPP5;Q14160;Q14160-3;A0A0G2JMS7;Q14160-2;Q5T0G3;H0YCG0;Q9BTT6-2	A0A0G2JNZ2;A0A0G2JPP5;Q14160;Q14160-3;A0A0G2JMS7;Q14160-2	Protein scribble homolog	SCRIB	+	+			32857	32226	39773	29131	27374	29985	29690	30498	5	5	4	5	5	4.2	174.91	0	12.523	1171800	6815.9	76	25	18	18	4	5
					F8VUC5;F8VVA7;F8VXB1;F8VXR1;F8VYE0;F8VYZ4;F8W156;F8W651;P61923;P61923-2;P61923-3;P61923-4;P61923-5	P61923-5	+	+	PSMD9	PSMD9	+	+			common -/+ PPase	B7Z683	B7Z683;A0A0G2JQ41;A0A1C7CYZ0;Q12979-4;Q12979-2;Q12979;I3NI05;Q12979-3;I3L1U8;I3L2P5;H0Y554	B7Z683;A0A0G2JQ41;A0A1C7CYZ0;Q12979-4;Q12979-2;Q12979;I3NI05;Q12979-3	Active breakpoint cluster region-related protein	ABR	+	+			19211	21768	15677	15002	22074	19046	20663	21082	3	2	2	8.7	7.2	7.2	73.516	0	6.1456	503310	4046.9	32	17	10	10	3	2
					P61769	P61769	+	+	PSME1	PSME1	+	+			common -/+ PPase	Q8NF37	Q8NF37;A0A0G2JQ62;A0A0G2JRI7	Q8NF37;A0A0G2JQ62;A0A0G2JRI7	Lysophosphatidylcholine acyltransferase 1	LPCAT1	+	+			78866	73818	75352	83469	82061	81947	97230	90664	6	6	6	18.5	18.5	18.5	59.151	0	26.31	3887900	74243	21	45	22	22	6	6
					A0A096LP33;A0A0D9SEH5;A0A0D9SEP9;A0A0D9SFQ7;A0A0D9SFW6;A0A0D9SG72;A0A1B0GTP9;A0A1B0GVQ5;A0A1B0GW76;A0A1B0GWF2;A0A2R8Y5D4;P61764;P61764-2	P61764-2	+	+	RDX	RDX	+	+			common -/+ PPase	A0A0G2JRD1	A0A0G2JRD1;S4R3K7;B0QYV1;A0A0G2JRA5;O43251-3;O43251-5;O43251-10;O43251-2;O43251;O43251-6;O43251-8	A0A0G2JRD1;S4R3K7;B0QYV1;A0A0G2JRA5;O43251-3;O43251-5;O43251-10;O43251-2;O43251;O43251-6;O43251-8	RNA binding protein fox-1 homolog;RNA binding protein fox-1 homolog 2	RBFOX2	+	+			39325	39622	50058	41210	23713	32843	29665	35941	2	2	2	22.9	22.9	22.9	23.543	0	16.135	594080	9154.5	10	11	6	6	1	2
					A0A087WWI6;P61962	P61962	+	+	RDH14	RDH14	+	+			common -/+ PPase	A0A0G2JRQ5	A0A0G2JRQ5;P30711-2;P30711	A0A0G2JRQ5;P30711-2;P30711	Glutathione S-transferase theta-1	GSTT1	+	+			49087	43236	47359	40605	92639	96368	117720	119480	3	3	3	13.7	13.7	13.7	24.739	0	8.7959	1385800	95161	10	18	11	11	2	3
					P61758;P61758-2	P61758-2	+	+	RDH11	RDH11	+	+			common -/+ PPase	Q9UHX1	Q9UHX1;Q9UHX1-2;Q9UHX1-5;Q9UHX1-3;Q9UHX1-6;Q9UHX1-4;A0A0J9YXX5;A0A0J9YVP6;A0A0J9YXJ8;A0A0J9YYL3;A0A0J9YWM1;A0A0J9YVR6;E9PQ56;H0YEM1;E9PMU7;E9PN18;H0YCP8;E9PL19	Q9UHX1;Q9UHX1-2;Q9UHX1-5;Q9UHX1-3;Q9UHX1-6;Q9UHX1-4;A0A0J9YXX5;A0A0J9YVP6;A0A0J9YXJ8;A0A0J9YYL3;A0A0J9YWM1;A0A0J9YVR6;E9PQ56;H0YEM1	Poly(U)-binding-splicing factor PUF60	PUF60	+	+			186510	180200	173630	192500	223350	231870	191430	190610	9	9	9	25	25	25	59.875	0	29.774	4185600	116680	25	44	32	32	7	5
					B8ZZ54;B8ZZL8;P61604	P61604	+	+	RCOR1	RCOR1	+	+			common -/+ PPase	A0A0J9YW54	A0A0J9YW54;A2A2F0;Q86X10-2;Q86X10-3;Q86X10;Q86X10-4	A0A0J9YW54;A2A2F0;Q86X10-2;Q86X10-3;Q86X10	Ral GTPase-activating protein subunit beta	RALGAPB	+	+			10225	10542	11466	9368.9	9378.6	8348.7	8877.2	7777.4	3	3	3	7.4	7.4	7.4	96.292	0	6.8319	214740	1488.6	37	9	9	9	3	2
					P37235;P61601;P84074	P61601	+	+	RCN2	RCN2	+	+			common -/+ PPase	A0A0J9YWL0	A0A0J9YWL0;Q9Y4K1;Q9Y4K1-2;Q96QW7	A0A0J9YWL0;Q9Y4K1	Absent in melanoma 1 protein	AIM1	+	+			70769	81902	93119	81041	76580	77595	90034	90227	13	13	13	10.9	10.9	10.9	231.71	0	28.489	2812200	18896	95	39	35	35	9	8
					C9JNR4;C9JRM1;C9JX21;E9PN11;P61586;Q5JR05;Q5JR06;Q5JR07;U3KQA9;U3KQV3	P61586	+	+	RCN1	RCN1	+	+			common -/+ PPase	A0A0J9YXF2	A0A0J9YXF2;A0A0J9YYG4;Q15165-1;Q15165;J3QT77;Q15165-3;G3XAK4;A0A0J9YXU7;A0A0J9YYJ1;A0A0J9YYF0;A0A0J9YYF3	A0A0J9YXF2;A0A0J9YYG4;Q15165-1;Q15165;J3QT77;Q15165-3;G3XAK4	Serum paraoxonase/arylesterase 2	PON2	+	+			88894	70245	100570	101700	114470	117380	125800	120310	9	9	9	54.9	54.9	54.9	41.527	0	35.364	3897300	119430	18	55	25	25	7	5
					C9J4Z3;P61513	P61513	+	+	RCL1	RCL1	+	+			common -/+ PPase	P43243	P43243;A8MXP9;A0A0R4J2E8;D6REM6;D6R991;P43243-2;B3KM87;H0Y8T4;D6RBK5;D6RCM3;D6REK4;D6R8Z5;D6RIA2;Q68E03;D6RB45;A0A1B0GX04;D6RE02;D6RBS2;D6R9F3;D6RBI2;D6RAY2;D6RAM9	P43243;A8MXP9;A0A0R4J2E8;D6REM6;D6R991;P43243-2;B3KM87	Matrin-3	MATR3	+	+			636340	609180	547300	503260	566380	606300	546800	575320	20	20	20	38.3	38.3	38.3	94.622	0	323.31	32505000	299580	37	191	75	75	17	17
					P61457	P61457	+	+	RCC2	RCC2	+	+			common -/+ PPase	A0A0R4J2G3	A0A0R4J2G3;Q6PIU2;A0A0A0MTJ9;Q6PIU2-2;H7C046;Q6PIU2-3;F8WE33	A0A0R4J2G3;Q6PIU2;A0A0A0MTJ9;Q6PIU2-2;H7C046;Q6PIU2-3	Neutral cholesterol ester hydrolase 1	NCEH1	+	+			491770	453200	451600	451570	384070	406360	377520	426930	13	13	13	38.6	38.6	38.6	49.062	0	50.011	19216000	619350	21	110	45	45	10	9
					P61964;Q86VZ2;V9GYQ5;V9GZ59	P61964	+	+	RCC1	RCC1	+	+			common -/+ PPase	Q13464	Q13464;A0A0U1RQV4;C9JFJ0	Q13464;A0A0U1RQV4	Rho-associated protein kinase 1	ROCK1	+	+			29793	34731	32768	34692	23223	24104	23304	23406	15	15	12	17.3	17.3	14.5	158.17	0	33.564	2112800	10564	84	63	52	52	10	10
					E9PMD7;P62136;P62136-2;P62136-3	P62136-3	+	+	RBMX	RBMX	+	+			common -/+ PPase	F6VDE0	F6VDE0;P51531;P51531-2;A0A0U1RQZ9;A0A2R8Y4R6;A0A2R8YCY3;Q9HBD4;A0A2R8Y4P4;A0A2R8Y7S2;A0A2R8YGG3;A0A2R8YFV8;A0A2R8Y440;A0A2R8Y7F3;A0A2R8YG32;A0A2R8Y6N0;A0A2R8Y6V2;A0A2R8Y523;A0A2R8YGP5;A0A2R8YDA1;A0A2R8YF80;A0A0A0MT49;A0A2R8Y4C5;A0A2R8YF58;A0A2R8Y526;A0A2R8Y7Y7;P51532-2;P51532-3;P51532-4;P51532;P51532-5	F6VDE0;P51531;P51531-2;A0A0U1RQZ9;A0A2R8Y4R6;A0A2R8YCY3;Q9HBD4;A0A2R8Y4P4;A0A2R8Y7S2;A0A2R8YGG3;A0A2R8YFV8;A0A2R8Y440;A0A2R8Y7F3;A0A2R8YG32;A0A2R8Y6N0;A0A2R8Y6V2;A0A2R8Y523;A0A2R8YGP5;A0A2R8YDA1;A0A2R8YF80;A0A0A0MT49;A0A2R8Y4C5;A0A2R8YF58;A0A2R8Y526;A0A2R8Y7Y7;P51532-2;P51532-3;P51532-4;P51532;P51532-5	Probable global transcription activator SNF2L2;Transcription activator BRG1	SMARCA2;SMARCA4	+	+			7959.7	10640	10940	14324	12688	15527	17155	11825	2	2	2	2.2	2.2	2.2	172.59	0	9.4852	244370	2466.8	55	8	6	6	1	2
					A0A2R8Y623;B5MCP9;P62081	P62081	+	+	RBMS2	RBMS2	+	+			common -/+ PPase	A0A0U1RR32	A0A0U1RR32;A0A0U1RRH7;Q99878;Q96KK5;Q9BTM1;P20671;P0C0S8;H0YFX9;Q9BTM1-2;A0A3B3IS11;Q71UI9-5	A0A0U1RR32;A0A0U1RRH7;Q99878;Q96KK5;Q9BTM1;P20671;P0C0S8;H0YFX9;Q9BTM1-2;A0A3B3IS11	Histone H2A type 1-J;Histone H2A type 1-H;Histone H2A.J;Histone H2A type 1-D;Histone H2A type 1;Histone H2A	HIST1H2AJ;HIST1H2AH;H2AFJ;HIST1H2AD;HIST1H2AG	+	+			4395200	4226400	4087100	4418000	6358100	7087900	6544500	6760000	12	3	0	50.3	19.5	0	18.481	0	66.2	190320000	14666000	8	121	37	37	8	8
					E9PK85;P62070;P62070-2;P62070-3;P62070-4	P62070-4	+	+	RBM8A	RBM8A	+	+			common -/+ PPase	F6XEV2	F6XEV2;A0A0U1RRK1;A0A286YF11;Q9BPX6;Q9BPX6-3;Q9BPX6-5;Q9BPX6-4;Q9BPX6-2;E9PQV6;S4R3W3;S4R3D7;S4R3V1	F6XEV2;A0A0U1RRK1;A0A286YF11;Q9BPX6;Q9BPX6-3;Q9BPX6-5;Q9BPX6-4;Q9BPX6-2;E9PQV6	Calcium uptake protein 1, mitochondrial	MICU1	+	+			48749	57600	56530	76001	68594	69642	75130	83238	5	5	5	16.9	16.9	16.9	54.578	0	12.721	1324800	38160	27	20	13	13	3	4
					A0A2R8YGH5;H7C1E4;P61966;P61966-2	P61966	+	+	RECQL	RECQL	+	+			common -/+ PPase	A0A0U1RRM8	A0A0U1RRM8;H0YJ34;Q96AC1;Q96AC1-3;Q96AC1-2;H0YJB6	A0A0U1RRM8;H0YJ34;Q96AC1;Q96AC1-3;Q96AC1-2	Fermitin family homolog 2	FERMT2	+	+			84377	76126	81739	83221	65228	73355	63618	74604	10	10	9	30.3	30.3	28.1	61.796	0	42.587	4603400	70746	29	77	39	39	8	9
					H3BRV9;P61970	P61970	+	+	RELA	RELA	+	+			common -/+ PPase	A0A140T8Y2	A0A140T8Y2;P36915-2;P36915	A0A140T8Y2;P36915-2;P36915	Guanine nucleotide-binding protein-like 1	GNL1	+	+			79142	79433	79711	73668	43683	46853	41832	52500	3	3	3	11.8	11.8	11.8	44.787	0	7.7507	990770	42259	20	15	9	9	3	3
					P61978;P61978-2;P61978-3;Q5T6W2;S4R359;S4R457	P61978	+	+	RHOG	RHOG	+	+			common -/+ PPase	A0A140T955	A0A140T955;A0A140T933;A0A1W2PPQ2;A0A1W2PRT9;A0A140T9I0;A0A140T9X5;A0A140T913;P01892	A0A140T955;A0A140T933;A0A1W2PPQ2;A0A1W2PRT9;A0A140T9I0;A0A140T9X5;A0A140T913;P01892	HLA class I histocompatibility antigen, A-2 alpha chain	HLA-A	+	+			173900	194220	220970	167210	180520	184340	146900	167300	6	1	0	26.8	5.7	0	34.288	0.0005259	2.8398	4602100	128920	20	35	20	20	6	5
					P61981	P61981	+	+	RHOC	RHOC	+	+			common -/+ PPase	A0A1W2PR11	A0A1W2PR11;A0A140T9J9;Q29963;A0A140T9B3;A0A140T962;P10321;A2AEA2;A0A140T9U8;A0A140T9H5;A0A140T921;O19617;A0A140T942;A0A140T9E1;A0A140T9L3;A0A140TA05;Q29865;P30499;F8W9Z8;A0A140T9Z7;P01893;P13747;A0A140TA12	A0A1W2PR11;A0A140T9J9;Q29963;A0A140T9B3;A0A140T962;P10321;A2AEA2;A0A140T9U8;A0A140T9H5;A0A140T921;O19617;A0A140T942;A0A140T9E1;A0A140T9L3;A0A140TA05;Q29865;P30499	HLA class I histocompatibility antigen, Cw-6 alpha chain;HLA class I histocompatibility antigen, Cw-7 alpha chain;HLA class I histocompatibility antigen, Cw-18 alpha chain;HLA class I histocompatibility antigen, Cw-1 alpha chain	HLA-C	+	+			94331	98780	98073	92849	96443	87665	90514	85546	10	8	0	39.1	28	0	36.848	0	22.112	4155800	116850	17	46	37	37	8	8
					C9JL85;P58546	P58546	+	+	RHOA	RHOA	+	+			common -/+ PPase	H0Y7N1	H0Y7N1;A0A140T971;Q5SSV3;Q5SRR8;O95865	H0Y7N1;A0A140T971;Q5SSV3;Q5SRR8;O95865	N(G),N(G)-dimethylarginine dimethylaminohydrolase 2	DDAH2	+	+			8563.1	20075	27604	21570	57171	38377	48637	44437	3	3	3	29.3	29.3	29.3	19.962	0	5.87	1038100	22007	9	13	7	7	1	2
					A6PVX3;H0Y3Y9;P55036;P55036-2	P55036	+	+	RHEB	RHEB	+	+			common -/+ PPase	Q5JNW7	Q5JNW7;A0A140T998;X5D2R7;P28062-2;P28062	Q5JNW7;A0A140T998;X5D2R7;P28062-2;P28062	Proteasome subunit beta type;Proteasome subunit beta type-8	PSMB8;PSM8	+	+			23980	52942	54807	47130	34793	32711	36363	32262	1	1	1	15.1	15.1	15.1	27.85	0.0019807	2.3098	445610	26213	17	7	4	4	1	1
					H0YK11;H0YK29;H0YLZ1;H0YM54;H0YMJ8;H0YN40;P55010	P55010	+	+	RGS20	RGS20	+	+			common -/+ PPase	O75955	O75955;A0A140T9R1;O75955-2;A0A140T959;A2AB10;A2AB09;A0A140T9X0;A0A140T9W4;A0A140T9C3;A2AB12;A2AB13;A2AB11;A0A0G2JJQ6;A0A140T910;A0A140T957;A0A140T9B1;A0A140T974;A2ABJ5;A0A140T905	O75955;A0A140T9R1;O75955-2;A0A140T959;A2AB10;A2AB09;A0A140T9X0	Flotillin-1	FLOT1	+	+			211720	216510	227770	213090	193910	205520	197400	225190	13	13	13	41	41	41	47.355	0	36.487	6503400	63809	27	75	39	39	8	6
					P54886;P54886-2	P54886-2	+	+	RFX1	RFX1	+	+			common -/+ PPase	Q03518	Q03518;A0A140T9T7;A0A0S2Z4R8	Q03518;A0A140T9T7;A0A0S2Z4R8	Antigen peptide transporter 1	TAP1	+	+			48882	55044	55961	45805	53215	55159	47069	42056	7	7	7	19.4	19.4	19.4	87.217	0	29.59	1591800	10907	37	40	25	25	6	7
					D6RIW1;P54868;P54868-2;P54868-3;Q01581	P54868-3	+	+	RFK	RFK	+	+			common -/+ PPase	I3L4Q1	I3L4Q1;K7EMZ9;A0A140TA76;Q8ND56-3;Q8ND56-2;Q8ND56	I3L4Q1;K7EMZ9;A0A140TA76;Q8ND56-3;Q8ND56-2;Q8ND56	Protein LSM14 homolog A	LSM14A	+	+			7589.7	32136	29123	19536	17527	17706	15558	6775	1	1	1	22.5	22.5	22.5	11.332	0.00053022	2.921	204710	34118	6	3	4	4	1	1
					F8VPP1;F8VY04;F8VZG5;F8W1A4;G3V213;P54819;P54819-2;P54819-3;P54819-4;P54819-5;P54819-6	P54819-6	+	+	RFC5	RFC5	+	+			common -/+ PPase	A0A140TA86	A0A140TA86;Q5XKP0;K7EIR2;A0A140TA84	A0A140TA86;Q5XKP0;K7EIR2;A0A140TA84	Protein QIL1	QIL1;C19orf70	+	+			46125	47016	76805	42615	83390	87345	107100	69615	4	4	4	39.3	39.3	39.3	15.436	0	60.148	1739200	13893	6	27	12	12	3	3
					P54802	P54802	+	+	RFC4	RFC4	+	+			common -/+ PPase	A0A182DWF2	A0A182DWF2;D3YTF8;A0A182DWF3;Q9NNW7-2;Q9NNW7;A0A096LPK7;Q9NNW7-3;A0A096LPD9;E7EWK1;A0A096LNY7;Q9NNW7-4;A0A0U1RQX0	A0A182DWF2;D3YTF8;A0A182DWF3;Q9NNW7-2;Q9NNW7;A0A096LPK7;Q9NNW7-3;A0A096LPD9;E7EWK1;A0A096LNY7;Q9NNW7-4	Thioredoxin reductase 2, mitochondrial	TXNRD2	+	+			35574	42860	36450	55255	34425	43880	32752	38901	6	6	6	27.1	27.1	27.1	53.567	0	16.91	1186700	14230	24	23	21	21	2	3
					P54753;P54760;Q96L35	P54760	+	+	RFC3	RFC3	+	+			common -/+ PPase	A0A1B0GTB8	A0A1B0GTB8;A0A1B0GWC0;A0A1B0GVF3;P23786;A0A1B0GV75;A0A1B0GTM0	A0A1B0GTB8;A0A1B0GWC0;A0A1B0GVF3;P23786;A0A1B0GV75	Carnitine O-palmitoyltransferase 2, mitochondrial	CPT2	+	+			29606	21535	28684	24270	26107	24407	28356	25469	6	6	6	15.9	15.9	15.9	71.181	0	15.508	899720	10630	34	30	19	19	3	5
					A8MZF9;J3QKW7;J3QR71;J3QRI9;P55039	P55039	+	+	RFC2	RFC2	+	+			common -/+ PPase	A0A1B0GUC3	A0A1B0GUC3;A0A1B0GV98;A0A1B0GTC5;A0A1B0GU26;A0A1B0GTC3;A0A1B0GVH5;Q9C0B1;A0A1B0GTY1;A0A1B0GTI3;A0A1B0GTZ8;A0A1B0GUY7;Q9C0B1-4;Q9C0B1-2;X6R3I0	A0A1B0GUC3;A0A1B0GV98;A0A1B0GTC5;A0A1B0GU26;A0A1B0GTC3;A0A1B0GVH5;Q9C0B1;A0A1B0GTY1	Alpha-ketoglutarate-dependent dioxygenase FTO	FTO	+	+			34877	46198	44330	42175	45554	45901	50033	47036	10	10	10	32.2	32.2	32.2	51.802	0	73.214	2221900	23954	26	58	34	34	9	6
					P55263;P55263-2;P55263-3;P55263-4	P55263-3	+	+	REXO2	REXO2	+	+			common -/+ PPase	P30566	P30566;A0A1B0GTJ7;A0A1B0GWJ0;A0A0A6YY92;A0A096LNY6;P30566-2;A0A1B0GWF8;A0A1B0GTG9;A0A096LNY5;A0A096LPA2;A0A096LP92;A0A096LNY4;A0A096LP76;A0A096LP72;B4DEP1;A0A096LNT0;V9GY96	P30566;A0A1B0GTJ7;A0A1B0GWJ0;A0A0A6YY92;A0A096LNY6;P30566-2;A0A1B0GWF8;A0A1B0GTG9	Adenylosuccinate lyase	ADSL	+	+			99511	100660	95822	92776	98452	107410	96411	98169	13	13	13	45.2	45.2	45.2	54.889	0	49.931	7072800	61657	25	93	48	48	10	9
					B7Z4K9;B7Z9C2;F5H4R6;F8VRJ2;F8VUX1;F8VV59;F8VVB5;F8VXI6;F8VY35;F8W020;F8W0J6;F8W118;H0YH88;H0YHC3;H0YIV4;P55209;P55209-2;P55209-3	P55209-3	+	+	RBM7	RBM7	+	+			common -/+ PPase	A0A1B0GV06	A0A1B0GV06;A0A1B0GUE3;A0A1B0GUG1;A0A1B0GUW4;E7EMM4;A0A1B0GW68;A0A1B0GUA4;A0A1B0GTM3;A0A1B0GTZ5;A0A1B0GUH5;Q13510-3;Q13510;Q13510-2;A0A1B0GTP7;A0A1B0GUB3;A0A1B0GVG2	A0A1B0GV06;A0A1B0GUE3;A0A1B0GUG1;A0A1B0GUW4;E7EMM4;A0A1B0GW68;A0A1B0GUA4;A0A1B0GTM3;A0A1B0GTZ5;A0A1B0GUH5;Q13510-3;Q13510;Q13510-2;A0A1B0GTP7	Acid ceramidase;Acid ceramidase subunit alpha;Acid ceramidase subunit beta	ASAH1	+	+			78787	80588	75928	70161	95098	88690	99859	88217	5	5	5	35.5	35.5	35.5	22.837	0	42.332	2138600	64249	13	27	20	20	5	5
					A8K878;H7C2D6;P55145	P55145	+	+	RBM4B	RBM4B	+	+			common -/+ PPase	H0Y488	H0Y488;A0A1B0GTU5;O14497-3;O14497-2;O14497	H0Y488;A0A1B0GTU5;O14497-3;O14497-2;O14497	AT-rich interactive domain-containing protein 1A	ARID1A	+	+			13033	15795	14272	16670	8672	8758.9	9875.5	9206.1	2	2	2	1.6	1.6	1.6	205.83	0	13.351	296710	783.96	70	9	8	8	2	2
					B5MD38;C9JE81;C9JEY0;C9K0M0;F5GZQ3;P55084;P55084-2	P55084-2	+	+	RBBP4	RBBP4	+	+			common -/+ PPase	A0A1B0GUA3	A0A1B0GUA3;Q96EK5;A0A1B0GUH6;A0A1B0GV79;A0A1B0GW21;A0A1B0GTE6;A0A0D9SFK7	A0A1B0GUA3;Q96EK5	KIF1-binding protein	KIAA1279	+	+			54441	51010	49991	45697	49427	53452	50116	57590	10	10	10	27.4	27.4	27.4	74.783	0	28.584	2840700	16721	35	53	34	34	8	8
					P55060;P55060-2;P55060-3;P55060-4	P55060	+	+	RAVER1	RAVER1	+	+			common -/+ PPase	A0A1B0GW44	A0A1B0GW44;A0A1B0GV23;A0A1B0GVD5;A0A1B0GWE8;P07339;A0A1B0GU92;A0A1B0GU03;A0A1B0GVP3;C9JH19;H7C469;H7C1V0;F8W787;A0A1B0GVF1;A0A1B0GV01	A0A1B0GW44;A0A1B0GV23;A0A1B0GVD5;A0A1B0GWE8;P07339;A0A1B0GU92;A0A1B0GU03;A0A1B0GVP3;C9JH19;H7C469	Cathepsin D;Cathepsin D light chain;Cathepsin D heavy chain	CTSD	+	+			385560	383860	368110	396860	346550	367120	344400	345570	13	13	4	41.2	41.2	13.8	43.688	0	177.65	21484000	661090	18	112	48	48	11	11
					C9IZA5;C9JUP7;P55072	P55072	+	+	RASGEF1C	RASGEF1C	+	+			common -/+ PPase	A0A1B0GV47	A0A1B0GV47;Q7Z4S6-6;Q7Z4S6-3;Q7Z4S6-5;Q7Z4S6-2;Q7Z4S6;Q7Z4S6-4;H0YIM7;H0YI78;H0YHT2;H0YHG9;H0YIM6	A0A1B0GV47;Q7Z4S6-6;Q7Z4S6-3;Q7Z4S6-5;Q7Z4S6-2;Q7Z4S6;Q7Z4S6-4	Kinesin-like protein KIF21A	KIF21A	+	+			11592	9277.3	10993	11788	13913	10840	12405	9075.7	6	6	6	7.3	7.3	7.3	184.71	0	9.3284	389800	559.39	65	16	15	15	5	4
					P55081	P55081	+	+	RASA1	RASA1	+	+			common -/+ PPase	A0A1C7CYX9	A0A1C7CYX9;Q16555;Q16555-2;E5RFU4	A0A1C7CYX9;Q16555;Q16555-2	Dihydropyrimidinase-related protein 2	DPYSL2	+	+			407440	431010	426530	440430	333890	355110	331790	340150	33	33	29	59.1	59.1	59.1	73.502	0	309.17	42174000	472240	39	281	113	113	27	28
					H0Y579;P54727;P54727-2;Q5W0S4;Q5W0S5	P54727-2	+	+	RARS	RARS	+	+			common -/+ PPase	A0A1W2PSC5	A0A1W2PSC5;A0A1W2PPQ7;A0A1W2PPR6;A0A1W2PPS0;A0A1W2PPC3;A0A1W2PP57;A0A1W2PP53;A0A1W2PRZ8;F6W983;A0A1W2PQN1;A0A1W2PQ52;A0A1W2PQY1;A0A1W2PNP0;Q969N2-2;Q969N2-4;Q969N2-5;Q969N2;A0A1W2PP13;A0A1W2PPK4	A0A1W2PSC5;A0A1W2PPQ7;A0A1W2PPR6;A0A1W2PPS0;A0A1W2PPC3;A0A1W2PP57;A0A1W2PP53;A0A1W2PRZ8;F6W983;A0A1W2PQN1;A0A1W2PQ52;A0A1W2PQY1;A0A1W2PNP0;Q969N2-2;Q969N2-4;Q969N2-5;Q969N2;A0A1W2PP13;A0A1W2PPK4	GPI transamidase component PIG-T	PIGT	+	+			38026	38518	46160	28466	40091	42351	43560	41137	2	2	2	29.7	29.7	29.7	14.332	0.00030826	4.5425	576180	78791	6	10	8	8	2	1
					E5RH09;E5RJM9;P54136;P54136-2	P54136-2	+	+	RAPH1	RAPH1	+	+			common -/+ PPase	A0A1W2PNQ5	A0A1W2PNQ5;A0A1W2PRE7;O43766-2;O43766-3;O43766	A0A1W2PNQ5;A0A1W2PRE7;O43766-2;O43766-3;O43766	Lipoyl synthase, mitochondrial	LIAS	+	+			5218.7	11279	8594.4	11268	11105	9612.9	12960	9193.3	1	1	1	11.5	11.5	11.5	29.334	0.002679	2.1151	116620	8970.7	13	2	4	4	1	1
					E9PJF4;E9PMI6;J3KN38;P54105	P54105	+	+	RAPGEF6	RAPGEF6	+	+			common -/+ PPase	A0A494C0T4	A0A494C0T4;A0A1W2PNW1;H0YJH6;P42226;P42226-2;P42226-3;Q5FBW6;G3V2L2;G3V2M3;G3V2H4;G3V5I8;G3V568;G3V370;G3V5K5	A0A494C0T4;A0A1W2PNW1;H0YJH6;P42226;P42226-2;P42226-3	Signal transducer and activator of transcription 6	STAT6	+	+			17478	19651	22803	19450	16707	20451	19855	18618	5	5	5	10.1	10.1	10.1	80.305	0	6.0583	545610	3315	29	13	14	14	4	4
					P53999	P53999	+	+	RAP2B	RAP2B	+	+			common -/+ PPase	A0A1W2PNX8	A0A1W2PNX8;Q9H3U1-2;Q9H3U1;Q9H3U1-3	A0A1W2PNX8;Q9H3U1-2;Q9H3U1	Protein unc-45 homolog A	UNC45A	+	+			99209	100860	95121	97391	80945	92570	96761	95645	21	21	21	27.5	27.5	27.5	118.39	0	314.95	8653500	74072	59	131	69	69	16	16
					G5EA31;P53992;P53992-2	P53992-2	+	+	RAP1A;RAP1B	RAP1B	+	+			common -/+ PPase	A0A1W2PPG5	A0A1W2PPG5;O14653;E7EQ34;A0A1W2PS81;A0A1W2PPP5;A0A1W2PQM3;A0A1W2PRC2;A0A1W2PPG1;I3L4Z6;O14653-2;I3NI02;A0A1W2PS12;A0A1W2PR23;A0A1W2PQS3;A0A1W2PNV3;A0A1W2PR02;A0A1W2PQ77;A0A1W2PRP7;A0A1W2PRL0;A0A1W2PQP2;A0A1W2PPW8;A0A1W2PQ12;A0A1W2PRV0;A0A1X7SBU8;A0A1W2PQE0;A0A1W2PQ38;O14653-3;I3L0K1;A0A1W2PP28;A0A1W2PPJ0;A0A1W2PRE6;I3L1K7;A0A1W2PQ06;A0A1W2PQQ4	A0A1W2PPG5;O14653;E7EQ34;A0A1W2PS81;A0A1W2PPP5;A0A1W2PQM3;A0A1W2PRC2;A0A1W2PPG1;I3L4Z6;O14653-2;I3NI02;A0A1W2PS12;A0A1W2PR23;A0A1W2PQS3;A0A1W2PNV3;A0A1W2PR02;A0A1W2PQ77;A0A1W2PRP7;A0A1W2PRL0;A0A1W2PQP2;A0A1W2PPW8;A0A1W2PQ12;A0A1W2PRV0;A0A1X7SBU8;A0A1W2PQE0;A0A1W2PQ38;O14653-3	Golgi SNAP receptor complex member 2	GOSR2	+	+			5511.3	11065	12808	16802	23570	20387	25846	22639	4	4	3	23.6	23.6	18.6	23.237	0	10.737	617540	20769	9	25	12	12	1	3
					F5GXM3;H3BMU1;H3BPP6;H3BQF7;H3BRE2;H3BUI0;J3KR23;P53990;P53990-2;P53990-3;P53990-4;P53990-5;P53990-6	P53990-6	+	+	RANGAP1	RANGAP1	+	+			common -/+ PPase	A0A1W2PPX5	A0A1W2PPX5;A0A1W2PQR6;A0A1W2PQB7;A0A1W2PS43;A0A1W2PRS1;Q14108;A0A1W2PRF6;A0A1W2PPU6;Q14108-2;A0A1W2PS70;A0A1W2PNX7;A0A1W2PSE4	A0A1W2PPX5;A0A1W2PQR6;A0A1W2PQB7;A0A1W2PS43;A0A1W2PRS1;Q14108;A0A1W2PRF6;A0A1W2PPU6;Q14108-2	Lysosome membrane protein 2	SCARB2	+	+			26375	32340	35599	32926	45562	42735	34725	35838	5	5	5	22.7	22.7	22.7	49.204	0	14.492	884350	5742.7	23	13	16	16	3	2
					A0A0C4DGZ5;P54577	P54577	+	+	RANBP9	RANBP9	+	+			common -/+ PPase	A0A1W2PPZ5	A0A1W2PPZ5;P23193;A0A1W2PRL9;P23193-2;E5RJ93;E5RIS7;E5RK46;A0A1W2PS15;A0A1W2PPV7;B7Z4S1	A0A1W2PPZ5;P23193;A0A1W2PRL9;P23193-2	Transcription elongation factor A protein 1	TCEA1	+	+			258510	278970	312640	239430	210750	228950	242170	219230	12	12	10	40.5	40.5	37.2	33.935	0	142.38	7671400	295680	17	92	42	42	11	9
					A0A087WVP4;A0A087X1R1;C9JQZ8;H7C372;P53814;P53814-5;P53814-6	P53814-6	+	+	RBBP5	RBBP5	+	+			common -/+ PPase	A0A1W2PQ43	A0A1W2PQ43;E9PK09;E9PQN2;E9PKI6;E9PK91;Q9NYF8-3;Q9NYF8-2;Q9NYF8;Q9NYF8-4;E9PJA7;H0YF00	A0A1W2PQ43;E9PK09;E9PQN2;E9PKI6;E9PK91;Q9NYF8-3;Q9NYF8-2;Q9NYF8;Q9NYF8-4;E9PJA7	Bcl-2-associated transcription factor 1	BCLAF1	+	+			66700	71066	69415	61584	59970	63785	65179	61816	10	10	10	13.9	13.9	13.9	80.618	0	20.471	3045600	2580.6	29	52	33	33	6	8
					A6NJA2;J3KS55;J3QQT6;P54578;P54578-2;P54578-3	P54578	+	+	RBBP7	RBBP7	+	+			common -/+ PPase	E9PNM1	E9PNM1;A0A1W2PQ47;P37268;P37268-2;P37268-4;P37268-3;P37268-5;E9PJG4;E9PS69	E9PNM1;A0A1W2PQ47;P37268;P37268-2;P37268-4;P37268-3;P37268-5	Squalene synthase	FDFT1	+	+			40694	45342	45004	42879	64878	68579	64234	54851	10	10	10	36.8	36.8	36.8	47.285	0	30.352	2722100	54413	22	50	32	32	5	7
					C9JA36;C9JXZ1;F8WBY4;H7C4L9;H7C547;P54709;P54709-2	P54709-2	+	+	RBM4	RBM4	+	+			common -/+ PPase	A0A1X7SBZ2	A0A1X7SBZ2;A0A1W2PQ51;Q92841;Q92841-1;Q92841-3;Q92841-2;A0A0U1RQJ0	A0A1X7SBZ2;A0A1W2PQ51;Q92841;Q92841-1;Q92841-3;Q92841-2	Probable ATP-dependent RNA helicase DDX17	DDX17	+	+			280520	294450	307810	333200	246190	265980	256270	266020	26	21	21	31.7	28.1	28.1	80.253	0	139.67	25848000	456440	37	178	93	93	22	21
					A0A0A0MT26;A0A2R8YEY8;E9PRA5;M0QXF2;M0R116;P05023;P05023-2;P05023-3;P05023-4;P13637;P13637-2;P13637-3;P54707;P54707-2;Q5TC01;Q5TC02	P54707-2	+	+	RBM39	RBM39	+	+			common -/+ PPase	A0A1W2PQ63	A0A1W2PQ63;E9PGF6;E9PFQ4;Q86SQ0-2;Q86SQ0-3;Q86SQ0	A0A1W2PQ63;E9PGF6;E9PFQ4;Q86SQ0-2;Q86SQ0-3;Q86SQ0	Pleckstrin homology-like domain family B member 2	PHLDB2	+	+			8274.7	8551.2	10073	10635	8650.5	8139.6	7070.4	9049.9	1	1	1	1.8	1.8	1.8	84.039	0.00052178	2.7704	100710	2650.2	38	6	4	4	1	1
					A0A087WYF2;F5H2F2;P54687;P54687-2;P54687-3;P54687-4;P54687-5	P54687-5	+	+	RBM3	RBM3	+	+			common -/+ PPase	A0A1W2PQ90	A0A1W2PQ90;Q92878-3;Q92878;Q92878-2;A0A494C1B7;E7EN38;A0A494C0Y7;A0A494BZX5;A0A494C122;E7ESD9;H7C0P8	A0A1W2PQ90;Q92878-3;Q92878;Q92878-2;A0A494C1B7;E7EN38;A0A494C0Y7;A0A494BZX5;A0A494C122	DNA repair protein RAD50	RAD50	+	+			29182	29729	30790	31037	21664	19864	26719	23124	9	9	9	11.9	11.9	11.9	142.94	0	18.223	1015400	7110.4	64	25	27	27	5	5
					F8VPF5;F8VYY9;F8VZX1;F8W046;H0YHF8;H0YIC9;P54619;P54619-2;P54619-3	P54619	+	+	RBM27	RBM27	+	+			common -/+ PPase	A0A1W2PQT3	A0A1W2PQT3;A0A1W2PQH3;A0A1W2PQY8;P23368;A0A1W2PR68;A0A1W2PPH1;A0A1W2PQ37;A0A1W2PQF8;P23368-2	A0A1W2PQT3;A0A1W2PQH3;A0A1W2PQY8;P23368;A0A1W2PR68;A0A1W2PPH1;A0A1W2PQ37;A0A1W2PQF8;P23368-2	NAD-dependent malic enzyme, mitochondrial	ME2	+	+			40321	50655	47881	52407	42113	41854	41781	38900	9	9	9	25.4	25.4	25.4	59.787	0	33.895	1987800	43183	29	47	30	30	4	5
					P54652	P54652	+	+	RBM25	RBM25	+	+			common -/+ PPase	A0A1W2PQV2	A0A1W2PQV2;H3BUH9;P23434	A0A1W2PQV2;H3BUH9;P23434	Glycine cleavage system H protein, mitochondrial	GCSH	+	+			315950	349230	311550	292040	245620	251390	264950	256100	2	2	2	23	23	23	10.999	0	91.367	3654100	1082700	3	12	7	7	1	1
					P55265;P55265-4;P55265-5	P55265	+	+	RBM19	RBM19	+	+			common -/+ PPase	A0A1W2PRB8	A0A1W2PRB8;E9PR95;E9PSC3;E9PLC5;E9PLB3;E9PIP1;E9PPB5;E9PQS1;A0A087WT99;A0A1W2PRX4;A0A1W2PNW7;Q9H0W9-3;Q9H0W9-2;Q9H0W9;Q9NVC6	A0A1W2PRB8;E9PR95;E9PSC3;E9PLC5;E9PLB3;E9PIP1;E9PPB5;E9PQS1;A0A087WT99;A0A1W2PRX4;A0A1W2PNW7;Q9H0W9-3;Q9H0W9-2;Q9H0W9;Q9NVC6	Ester hydrolase C11orf54;Mediator of RNA polymerase II transcription subunit 17	C11orf54;MED17	+	+			27803	44730	24695	32437	38203	25604	30459	35954	2	2	2	5.8	5.8	5.8	93.444	0	19.832	558950	5771.5	38	4	7	7	2	1
					A0A2R8Y4C2;A0A2R8Y596;A0A2R8Y5C9;A0A2R8Y5E4;A0A2R8Y6M6;A0A2R8Y8C4;A0A2R8YFK2;A0A2R8YFS8;H3BN62;P56945;P56945-2;P56945-3;P56945-4;P56945-5;P56945-6;P56945-7;P56945-8	P56945-8	+	+	RBM17	RBM17	+	+			common -/+ PPase	B4DP61	B4DP61;A0A1W2PRV5;E7EQZ4;Q16637-4;Q16637-2;Q16637-3;Q16637	B4DP61;A0A1W2PRV5;E7EQZ4;Q16637-4;Q16637-2;Q16637-3;Q16637	Survival motor neuron protein	SMN2;SMN1	+	+			45642	40349	13322	14382	33679	39187	13910	13872	2	2	1	17.2	17.2	7.9	24.38	0.00051626	2.6684	302170	60435	5	7	4	4	1	1
					A0A087WYL1;H0Y8U5;P56545;P56545-2;P56545-3;Q5SQP8	P56545-3	+	+	RBM15	RBM15	+	+			common -/+ PPase	A0A286YES1	A0A286YES1;P01860	A0A286YES1;P01860	Ig gamma-3 chain C region	IGHG3	+	+			3254000	4106100	32073	19972	12606	4250.7	3194.6	4935.5	8	3	1	19.5	9.9	2.7	49.021	0	5.8084	20815000	66862	19	40	8	8	7	7
					A0A0U1RQV5;B7ZBH1;P56537;P56537-2	P56537-2	+	+	RBM10	RBM10	+	+			common -/+ PPase	A0A286YEX4	A0A286YEX4;P08651-4;P08651-5;P08651-3;P08651-6;P08651-2;P08651;B1AKN6;B1AKN7;B1AKN5;B1AKN8;Q12857-2;Q12857-3;Q12857;Q12857-4	A0A286YEX4;P08651-4;P08651-5;P08651-3;P08651-6;P08651-2;P08651	Nuclear factor 1 C-type	NFIC	+	+			18108	19721	34126	36029	15747	12701	15086	11810	3	3	3	12.1	12.1	12.1	58.203	0	7.6397	355020	6389.9	29	8	8	8	2	2
					P56385	P56385	+	+	RBKS	RBKS	+	+			common -/+ PPase	A0A286YEX5	A0A286YEX5;C9JRZ6;F8WAR4;Q9NX63	A0A286YEX5;C9JRZ6;F8WAR4;Q9NX63	MICOS complex subunit MIC19	CHCHD3	+	+			22370	18466	20270	15114	27273	28504	24542	63056	3	3	3	33.7	33.7	33.7	11.279	0	7.3316	379280	67520	5	10	5	5	1	1
					F5H2V6;F8VS26;F8VZZ9;F8W0M7;F8W0S4;H0YHV5;H0YI94;H0YIC2;H0YIP0;P56192;P56192-2	P56192-2	+	+	RBFOX2	RBFOX2	+	+			common -/+ PPase	A0A286YEY1	A0A286YEY1;P01876	A0A286YEY1;P01876	Ig alpha-1 chain C region	IGHA1	+	+			919100	962190	90493	84397	239510	179160	254630	317150	7	7	1	28.6	28.6	3.8	42.848	0	68.639	7410000	411790	15	35	15	15	7	6
					P57060	P57060	+	+	RHOT2	RHOT2	+	+			common -/+ PPase	A0A286YF22	A0A286YF22;O43175;A0A286YFA2;A0A2C9F2M7;A0A286YFL2;A0A286YFM8;A0A286YER3;A0A286YFC8;A0A286YFB2;A0A286YF34;A0A286YF78;A0A286YFF3;A0A286YFK5;A0A286YFE1	A0A286YF22;O43175;A0A286YFA2;A0A2C9F2M7;A0A286YFL2;A0A286YFM8	D-3-phosphoglycerate dehydrogenase	PHGDH	+	+			510350	463970	455190	445950	397920	415540	410790	441330	16	16	16	39.5	39.5	39.5	55.938	0	120.62	21774000	638620	24	124	54	54	13	13
					P57081;P57081-2;P57081-3	P57081	+	+	RHPN2;RHPN2P1	RHPN2	+	+			common -/+ PPase	A0A2C9F2P4	A0A2C9F2P4;A0A286YFF7;P50897;E9PIA8;E9PSE5;E9PK48;Q5T0S4;A0A286YFE3;A0A286YFL8;P50897-2	A0A2C9F2P4;A0A286YFF7;P50897;E9PIA8;E9PSE5;E9PK48;Q5T0S4;A0A286YFE3;A0A286YFL8;P50897-2	Palmitoyl-protein thioesterase 1	PPT1	+	+			47414	54166	65020	59479	64602	62481	62230	61548	4	4	4	17	17	17	34.136	0	26.961	2235800	110200	12	34	15	15	4	4
					E9PIB2;G3V1A6;P57764	P57764	+	+	RPL13a;RPL13A	RPL13a	+	+			common -/+ PPase	F8VZV1	F8VZV1;A0A286YFF8;Q7Z3U7-2;Q7Z3U7-6;Q7Z3U7-5;Q7Z3U7	F8VZV1;A0A286YFF8;Q7Z3U7-2;Q7Z3U7-6;Q7Z3U7-5;Q7Z3U7	Protein MON2 homolog	MON2	+	+			8313.5	11275	13255	6244.2	10497	10182	12131	9653.3	3	3	3	5.7	5.7	5.7	117.96	0	7.7049	226930	746.73	45	10	9	9	3	3
					G3V1T4;H0YG15;P57740;P57740-2;P57740-3	P57740-3	+	+	RPL13	RPL13	+	+			common -/+ PPase	A0A286YFJ8	A0A286YFJ8;P01861	A0A286YFJ8;P01861	Ig gamma-4 chain C region	IGHG4	+	+			3195000	4187700	22371	13658	9430.8	2996.2	2203.7	3697	8	1	1	24.2	4.3	4.3	43.831	0.00029762	4.0827	27463000	387720	15	47	8	8	7	6
					O14966;P57729;Q13637	P57729	+	+	RPL12	RPL12	+	+			common -/+ PPase	A0A2Q2TH77	A0A2Q2TH77;Q08379;A0A087WYC0;Q08379-2;A0A1W2PQY5;B7ZC06;Q9NVV4-2	A0A2Q2TH77;Q08379;A0A087WYC0;Q08379-2	Golgin subfamily A member 2	GOLGA2	+	+			34152	42617	39108	37342	29404	28038	30314	29300	3	3	3	4.5	4.5	4.5	111.66	0	16.038	774610	10030	45	19	12	12	3	2
					E9PFP8;F8VRH0;F8VTZ0;F8VXH9;F8VZX2;F8W0G4;F8W1G6;H3BND9;H3BRU6;H3BSP4;H3BSS4;J3QT27;P57721;P57721-2;P57721-3;P57721-4;P57721-5;Q15366;Q15366-2;Q15366-3;Q15366-4;Q15366-5;Q15366-6;Q15366-7;Q15366-8	P57721-5	+	+	RPL11	RPL11	+	+			common -/+ PPase	Q13555-11	Q13555-11;Q13555-2;A0A2Q3DQE3;Q5SWX3;Q13555-10;Q13555-7;Q13555-6;Q13555;Q13555-3;Q13555-4;Q13555-5;Q13555-9;Q13555-8;Q8WU40;H0Y6G2;Q13554;Q13554-2;Q13554-5;Q13554-8;Q13554-3;Q13554-6;Q13554-4;Q13554-7;H7BZC6	Q13555-11;Q13555-2;A0A2Q3DQE3;Q5SWX3;Q13555-10;Q13555-7;Q13555-6;Q13555;Q13555-3;Q13555-4;Q13555-5;Q13555-9;Q13555-8;Q8WU40;H0Y6G2	Calcium/calmodulin-dependent protein kinase type II subunit gamma	CAMK2G	+	+			50762	51117	64338	58041	40136	49073	51903	52411	7	7	4	17.3	17.3	8.9	60.201	0	20.751	2126500	58171	24	41	26	26	7	5
					D6RAA6;H0Y8N0;P57088	P57088	+	+	RPL10A	RPL10A	+	+			common -/+ PPase	A0A2R8Y5L4	A0A2R8Y5L4;A0A2R8Y6S4;A0A2R8Y4E3;A0A2R8Y4X1;A0A2R8Y6U6;A0A2R8YH84;A0A2R8Y5X5;A0A2R8Y5J3;A0A2R8Y4P8;B7Z2R4;A0A2R8YGQ3;A0A2R8YD68;A0A2R8Y652;A0A2R8YEY2;A0A2R8Y5J6;A0A2R8Y5X0;A0A2R8Y638;A0A2R8Y5R7;A0A2R8Y5M2;A0A2R8YE48;A0A2R8YFA5;A0A2R8Y5Q3;A0A2R8Y504;A0A2R8Y7J1;A0A2R8Y2R1;A0A2R8Y6Y5;A0A2R8Y7Q5;A0A2R8Y6G8;A0A2R8Y448;A0A2R8Y6D4;E9PEH6;A0A2R8Y5H7;A0A2R8YE16;A0A2R8YE99;A0A2R8Y821;A0A2R8Y416;A0A2R8Y628;…	A0A2R8Y5L4;A0A2R8Y6S4;A0A2R8Y4E3;A0A2R8Y4X1;A0A2R8Y6U6;A0A2R8YH84;A0A2R8Y5X5;A0A2R8Y5J3;A0A2R8Y4P8;B7Z2R4;A0A2R8YGQ3;A0A2R8YD68;A0A2R8Y652;A0A2R8YEY2;A0A2R8Y5J6;A0A2R8Y5X0;A0A2R8Y638;A0A2R8Y5R7;A0A2R8Y5M2;A0A2R8YE48;A0A2R8YFA5;A0A2R8Y5Q3;A0A2R8Y504;A0A2R8Y7J1;A0A2R8Y2R1;A0A2R8Y6Y5;A0A2R8Y7Q5;A0A2R8Y6G8;A0A2R8Y448;A0A2R8Y6D4;E9PEH6;A0A2R8Y5H7;A0A2R8YE16;A0A2R8YE99;A0A2R8Y821;A0A2R8Y416;A0A2R8Y628;…	Epsilon-sarcoglycan	SGCE	+	+			3513	2233.4	3808.7	3429.4	4668	4638.4	3798.4	3230.8	1	1	1	13	13	13	18.182	0.0007657	2.5584	44432	4936.9	9	3	4	4	1	1
					A0A087WTA2;A0A087WUM0;A0A087WYV9;A0A087X1F5;P57105	P57105	+	+	RPIA	RPIA	+	+			common -/+ PPase	A0A2R8YEA0	A0A2R8YEA0;A0A2R8Y7K2;A0A2R8Y5N9;A0A2R8Y481;A0A2R8YFW8;A0A2R8YGN6;A0A2R8YCL5;A0A2R8Y4I8;A0A2U3TZR0;Q9UBP0-4;Q9UBP0-3;Q9UBP0-2;Q9UBP0	A0A2R8YEA0;A0A2R8Y7K2;A0A2R8Y5N9;A0A2R8Y481;A0A2R8YFW8;A0A2R8YGN6;A0A2R8YCL5;A0A2R8Y4I8;A0A2U3TZR0;Q9UBP0-4;Q9UBP0-3;Q9UBP0-2;Q9UBP0	Spastin	SPAST	+	+			9287.1	9183.4	6610.5	5237.8	14283	15269	20975	23135	1	1	1	19.9	19.9	19.9	17.719	0.00027248	3.2171	160650	16065	10	4	4	4	1	1
					I3L2C7;P57678	P57678	+	+	RPF2	RPF2	+	+			common -/+ PPase	P56945-6	P56945-6;A0A2R8Y6M6;A0A2R8Y5C9;A0A2R8Y8C4;A0A2R8YFS8;A0A2R8Y5E4;A0A2R8Y4C2;A0A2R8YFK2;A0A2R8Y596;P56945;P56945-8;P56945-2;P56945-3;P56945-5;P56945-7;P56945-4;H3BN62	P56945-6;A0A2R8Y6M6;A0A2R8Y5C9;A0A2R8Y8C4;A0A2R8YFS8;A0A2R8Y5E4;A0A2R8Y4C2;A0A2R8YFK2;A0A2R8Y596;P56945;P56945-8;P56945-2;P56945-3;P56945-5;P56945-7;P56945-4	Breast cancer anti-estrogen resistance protein 1	BCAR1	+	+			32194	35190	33153	35815	22289	21286	22515	23672	6	6	6	13.9	13.9	13.9	97.876	0	24.345	1026100	3545.6	42	25	15	15	5	4
					P56181-2	P56181-2	+	+	RPF1	RPF1	+	+			common -/+ PPase	Q969G3	Q969G3;A0A2U3TZQ7;B4DGM3;A0A2R8Y855;A0A2R8YES3;A0A2R8Y4T4;A0A2R8Y7I9;A0A2R8Y7U4;J3QKS7;A0A2R8Y765;Q969G3-5;Q969G3-6;Q969G3-3;Q969G3-2;Q969G3-4;J3QR61;K7EMQ8;H7C048	Q969G3;A0A2U3TZQ7;B4DGM3;A0A2R8Y855;A0A2R8YES3;A0A2R8Y4T4;A0A2R8Y7I9;A0A2R8Y7U4;J3QKS7;A0A2R8Y765;Q969G3-5;Q969G3-6;Q969G3-3;Q969G3-2;Q969G3-4;J3QR61;K7EMQ8;H7C048	SWI/SNF-related matrix-associated actin-dependent regulator of chromatin subfamily E member 1	SMARCE1	+	+			37761	40694	37855	36475	33429	29482	31993	26826	5	5	5	19.5	19.5	19.5	46.649	0	14.829	1428000	34932	20	34	16	16	3	4
					A8MXL6;E7ERC8;P55735;P55735-2;P55735-3;P55735-4	P55735-3	+	+	RPAP3	RPAP3	+	+			common -/+ PPase	A0A2R8YF61	A0A2R8YF61;A0A2R8Y7W5;A0A2R8Y4Z0;Q14004-2;Q14004;A0A2R8YEB7;A0A2R8Y644;Q9BVE2;A0A087X209;A0A2R8YD28	A0A2R8YF61;A0A2R8Y7W5;A0A2R8Y4Z0;Q14004-2;Q14004;A0A2R8YEB7;A0A2R8Y644;Q9BVE2;A0A087X209;A0A2R8YD28	Cyclin-dependent kinase 13	CDK13	+	+			100650	80122	75440	81563	79374	84160	78984	80834	3	2	1	5.2	4.4	2.5	101.54	0	27.059	1520800	26672	44	26	11	11	2	2
					H0YC42;H0YC44;H7C5V3;P55327-8;U3KQQ8	P55327-8	+	+	RPAP1	RPAP1	+	+			common -/+ PPase	A0A2R8Y804	A0A2R8Y804;A0A2R8Y543;A0A2R8Y750;A0A2R8YCH5;A0A2R8Y7Z0;A0A2R8Y5A3;P35222;A0A2R8Y5C3;A0A2R8Y5Z1;B4DGU4;A0A2R8Y6G0;E9PDF9;E7EV28;A0A2R8YG06;E7EMJ5	A0A2R8Y804;A0A2R8Y543;A0A2R8Y750;A0A2R8YCH5;A0A2R8Y7Z0;A0A2R8Y5A3;P35222;A0A2R8Y5C3;A0A2R8Y5Z1;B4DGU4	Catenin beta-1	CTNNB1	+	+			45416	34462	27741	15937	47629	48714	41199	42991	7	5	5	14.4	11.8	11.8	77.206	0	16.616	1729700	28471	42	41	23	23	4	4
					E5RFR7;E5RK35;P55327;P55327-2;P55327-3;P55327-4;P55327-5;P55327-6;P55327-7	P55327-7	+	+	RPA3	RPA3	+	+			common -/+ PPase	A0A2R8Y566	A0A2R8Y566;Q9P260;Q9P260-2;A0A075B785	A0A2R8Y566;Q9P260;Q9P260-2;A0A075B785	LisH domain and HEAT repeat-containing protein KIAA1468	KIAA1468	+	+			17747	16629	14595	15904	13044	13728	15900	13149	5	5	5	6.7	6.7	6.7	134.59	0	8.6374	452080	5354.9	57	18	15	15	4	4
					A0A3B3IRQ9;A0A3B3ISU1;A0A3B3ISX1;A0A3B3ITG9;H0YCK3;P55265-2;P55265-3	P55265-3	+	+	RPA2	RPA2	+	+			common -/+ PPase	H0YH87	H0YH87;A0A2R8Y7P6;A0A2R8YDM9;F8WB06;V9GY86;A0A2R8Y7E6;A0A2R8Y5A6;Q99700-2;Q99700-4;Q99700;F8VQP2;F8VRK6;Q99700-5;F8VVY6;F8W0B5	H0YH87;A0A2R8Y7P6;A0A2R8YDM9;F8WB06;V9GY86;A0A2R8Y7E6;A0A2R8Y5A6;Q99700-2;Q99700-4;Q99700;F8VQP2;F8VRK6;Q99700-5	Ataxin-2	ATXN2	+	+			62280	62215	58169	62315	54992	47620	46220	34914	6	6	6	14.4	14.4	14.4	90.166	0	12.468	1281400	28993	35	16	16	16	3	5
					A0A3B3IRU2;A0A3B3ISK4;A0A3B3IUA2;B1AHD1;P55769	P55769	+	+	RPL14	RPL14	+	+			common -/+ PPase	A0A2R8YEZ4	A0A2R8YEZ4;A0A2R8Y5D3;O15160-2;O15160;E7EQB9;A0A2R8YEY5;A0A2R8Y8D6;D6RDJ3;H0Y723	A0A2R8YEZ4;A0A2R8Y5D3;O15160-2;O15160;E7EQB9;A0A2R8YEY5;A0A2R8Y8D6	DNA-directed RNA polymerases I and III subunit RPAC1	POLR1C	+	+			154270	148350	129640	138200	112910	115490	132000	136900	9	9	9	42.3	42.3	42.3	34.958	0	25.917	3619500	175710	15	35	26	26	7	7
					C9JGL8;C9JJT5;C9JU26;G3V325;O75127;P56134;P56134-2;P56134-3;P56134-4	P56134-4	+	+	RPL26;RPL26L1	RPL26	+	+			common -/+ PPase	Q15813	Q15813;A0A2R8Y5Q8;A0A2R8YHI9;A0A2R8Y7E7;Q15813-2;A0A2U3TZJ6;A0A2R8YFL4;A0A2R8Y6Q1;A0A2R8Y4V6;A0A2R8Y784;A0A2R8Y809;A0A2R8YER9;A0A2R8Y897;A0A2R8YFM3;A0A2R8Y4P2;A0A2R8Y787;A0A2R8Y6L2;A0A2R8Y5H6;A0A2R8YF12;A0A2R8Y597;A0A2R8Y4E7;A0A2R8Y6G3;A0A2R8YH53	Q15813;A0A2R8Y5Q8;A0A2R8YHI9;A0A2R8Y7E7;Q15813-2;A0A2U3TZJ6;A0A2R8YFL4;A0A2R8Y6Q1;A0A2R8Y4V6;A0A2R8Y784;A0A2R8Y809;A0A2R8YER9;A0A2R8Y897	Tubulin-specific chaperone E	TBCE	+	+			76591	71725	65318	76046	62906	78270	72086	85829	6	6	6	19.4	19.4	19.4	59.345	0	25.252	2264900	23681	36	45	23	23	6	6
					B2ZP78;P55957;P55957-2;P55957-3;P55957-4	P55957-4	+	+	RPL24	RPL24	+	+			common -/+ PPase	A0A2R8YE65	A0A2R8YE65;A0A2R8Y5R2;A0A2R8YDB6;A0A2R8Y7K8;A0A2R8YFM1;A0A2R8Y5S6;A0A2R8Y622;A0A2R8YGJ7;A0A2U3TZH5;A0A2R8Y700;A0A2R8Y7A1;A0A2R8YED7;Q8WXI2-4;Q8WXI2-2;Q8WXI2-5;Q8WXI2	A0A2R8YE65;A0A2R8Y5R2;A0A2R8YDB6;A0A2R8Y7K8;A0A2R8YFM1;A0A2R8Y5S6;A0A2R8Y622;A0A2R8YGJ7;A0A2U3TZH5;A0A2R8Y700;A0A2R8Y7A1;A0A2R8YED7;Q8WXI2-4;Q8WXI2-2;Q8WXI2-5;Q8WXI2	Connector enhancer of kinase suppressor of ras 2	CNKSR2	+	+			618040	626040	635680	623080	568710	575980	558620	574390	1	1	1	5	5	5	25.172	1	-2	6789900	617270	11	1	4	4	1	1
					A6NEC2;A6NEC2-2;A6NEC2-3;E9PJ74;E9PJY4;E9PLK3;E9PP11;E9PPD4;E9PRQ5;H0YCQ5;H0YDG0;P55786;P55786-2	P55786	+	+	RPL23A	RPL23A	+	+			common -/+ PPase	A0A2R8Y5S7	A0A2R8Y5S7;P35241;P35241-5;A0A2R8Y7M3;P35241-2;E9PQ82;E9PNV3;A0A2R8Y4H6;P35241-3;E9PKN5;E9PNP4;A0A2R8Y5P0	A0A2R8Y5S7;P35241;P35241-5;A0A2R8Y7M3	Radixin	RDX	+	+			1004700	1047600	1099900	1094500	1359100	1345700	1418400	1376100	17	9	0	31.4	19.8	0	69.335	0	62.596	36730000	1000600	31	138	67	67	14	16
					P55795	P55795	+	+	RPL23	RPL23	+	+			common -/+ PPase	A0A2R8Y5V9	A0A2R8Y5V9;A0A2R8YGX3;A0A2R8YH90;A0A2R8YEU4;K7ERG3;A0A2R8YHD2;K7EPV9;K7EMU5	A0A2R8Y5V9;A0A2R8YGX3;A0A2R8YH90;A0A2R8YEU4;K7ERG3		TPM4	+	+			612830	596580	881860	921020	1476400	1591500	1439600	1520600	17	11	2	49.2	29	7.3	28.609	0	85.655	56442000	903560	15	125	59	59	13	11
					E9PDW2;P55809;P55809-2;Q9BYC2	P55809	+	+	RPL22	RPL22	+	+			common -/+ PPase	A0A2R8Y653	A0A2R8Y653;Q9BZX2;Q9BZX2-2;Q9HA47-3;Q9HA47;Q9HA47-4	A0A2R8Y653;Q9BZX2	Uridine-cytidine kinase 2	UCK2	+	+			50925	47011	53241	54632	55939	57951	62600	56910	10	10	10	55.4	55.4	55.4	27.408	0	43.609	2782300	62500	14	60	30	30	6	8
					C9JQN7;C9JZG1;P55884;P55884-2	P55884	+	+	RPL21	RPL21	+	+			common -/+ PPase	O14936-3	O14936-3;A0A2U3TZM1;O14936;A0A2R8YE77;A0A2R8Y6F8;O14936-2;O14936-5;O14936-6;O14936-4;Q5JS72;A0A2R8Y3B3;A0A2U3TZM4;A0A2U3TZN6;A0A2R8YEK3;A0A2R8YFN5;Q5JS79;Q5JS74;A0A2R8YEJ7;A0A2R8Y6D8	O14936-3;A0A2U3TZM1;O14936;A0A2R8YE77;A0A2R8Y6F8;O14936-2;O14936-5;O14936-6;O14936-4;Q5JS72;A0A2R8Y3B3;A0A2U3TZM4;A0A2U3TZN6;A0A2R8YEK3;A0A2R8YFN5;Q5JS79	Peripheral plasma membrane protein CASK	CASK	+	+			7280.6	10718	6321.5	8721.4	14528	23008	10278	13517	5	5	5	13	13	13	102.11	0	5.1683	356430	1990.6	45	6	12	12	2	3
					P48163;P48163-2	P48163-2	+	+	RPA1	RPA1	+	+			common -/+ PPase	A0A2R8Y6J3	A0A2R8Y6J3;P46777;Q5T7N0;A0A2R8Y4A2	A0A2R8Y6J3;P46777	60S ribosomal protein L5	RPL5	+	+			332780	356750	345000	385350	333580	328830	316870	354730	13	13	13	58.4	58.4	58.4	27.045	0	196.59	22259000	620760	11	114	44	44	12	10
					P33981;P33981-2	P33981-2	+	+	RPL19	RPL19	+	+			common -/+ PPase	A0A2R8Y6W8	A0A2R8Y6W8;P19447	A0A2R8Y6W8;P19447	TFIIH basal transcription factor complex helicase XPB subunit	ERCC3	+	+			17998	22293	23021	23638	17045	17818	16655	19375	1	1	1	2.6	2.6	2.6	91.957	0.0019995	2.3852	356190	5083.9	44	10	4	4	1	1
					P06899;P23527;P33778;Q16778	P33778	+	+	RPL18A	RPL18A	+	+			common -/+ PPase	A0A2R8YCT7	A0A2R8YCT7;A0A2R8Y6X2;Q8TEA8	A0A2R8YCT7;A0A2R8Y6X2;Q8TEA8	D-tyrosyl-tRNA(Tyr) deacylase 1	DTD1	+	+			24699	20995	30272	27813	20669	27357	23351	24811	1	1	1	11.8	11.8	11.8	14.535	0.0040738	1.982	288940	48157	6	4	4	4	1	1
					A0A0A0MS99;I3L4X2;P33527;P33527-2;P33527-3;P33527-4;P33527-5;P33527-6;P33527-7;P33527-8;P33527-9	P33527-9	+	+	RPL18	RPL18	+	+			common -/+ PPase	Q5T9Q5	Q5T9Q5;A0A2R8YDQ9;A0A2R8Y6Y7;Q9P2R7-2;Q9P2R7;A0A0U1RRI1;Q5T9Q8	Q5T9Q5;A0A2R8YDQ9;A0A2R8Y6Y7;Q9P2R7-2;Q9P2R7;A0A0U1RRI1;Q5T9Q8	Succinyl-CoA ligase [ADP-forming] subunit beta, mitochondrial	SUCLA2	+	+			58702	46120	57501	44032	62553	62694	71700	74709	3	3	3	14.4	14.4	14.4	32.039	0.00052854	2.8938	963970	53761	17	10	9	9	3	2
					A0A3B3IRR8;A0A3B3IS57;A0A3B3IT92;A0A3B3ITP6;A0A3B3IU45;A0A494C100;E5RG31;P33991;Q9UJA3;Q9UJA3-2;Q9UJA3-3;Q9UJA3-4	P33991	+	+	RPL17;RPL17-C18orf32	RPL17-C18orf32	+	+			common -/+ PPase	Q3V6T2	Q3V6T2;Q3V6T2-3;Q3V6T2-2;Q3V6T2-4;Q3V6T2-5;A0A2U3TZV9;A0A2R8Y7B1;A0A2R8Y4X4;A0A2R8Y4W8;A0A2R8YG73;A0A2R8YGU1;A0A087WXD9;A0A2R8YG52;A0A2R8YCU9;A0A2R8Y6B2;A0A2R8Y820;A0A2R8Y885;H7C2C6;H0Y470;A0A2R8YDS8;A0A2R8Y7D4;A0A2R8Y7D9;H0Y7U8;A0A2R8Y5D7;A0A2R8YD81;A0A2R8Y4Z5;H0Y7K3;A0A2R8Y802;A0A2R8Y4C6	Q3V6T2;Q3V6T2-3;Q3V6T2-2;Q3V6T2-4;Q3V6T2-5;A0A2U3TZV9;A0A2R8Y7B1;A0A2R8Y4X4;A0A2R8Y4W8;A0A2R8YG73;A0A2R8YGU1;A0A087WXD9;A0A2R8YG52	Girdin	CCDC88A	+	+			16440	14603	15608	12352	10343	12062	10478	10420	9	9	9	7.6	7.6	7.6	216.04	0	11.499	527280	1289.3	94	15	24	24	6	4
					A0A0C4DGL3;H0YKC5;H0YKI0;H0YMM5;H0YMP1;H0YNJ9;H0YNW5;P33316;P33316-2	P33316-2	+	+	RPL15	RPL15	+	+			common -/+ PPase	A0A2R8YE98	A0A2R8YE98;A0A494BZX3;A0A2R8Y7C3;Q8N4S0	A0A2R8YE98;A0A494BZX3;A0A2R8Y7C3;Q8N4S0	Coiled-coil domain-containing protein 82	CCDC82	+	+			10724	10579	10169	9076	6754.5	9320.3	11102	8219.6	2	2	1	6.4	6.4	2.5	60.678	0	4.9811	203650	4455.9	22	13	6	6	2	2
					A0A0A0MT56;E7EWR4;E9PID8;P33240;P33240-2;Q9H0L4	P33240-2	+	+	RANBP2	RANBP2	+	+			common -/+ PPase	A0A2R8Y7G9	A0A2R8Y7G9;P0DPK2;P0DPK5	A0A2R8Y7G9;P0DPK2;P0DPK5			+	+			91874	49767	99569	59685	21486	21427	26381	13949	1	1	1	23.5	23.5	23.5	15.423	0	5.3897	489400	6065.1	5	3	4	4	1	1
					B1AHA9;B1AHB1;B1AHB2;F8WFD7;P33992	P33992	+	+	ROCK2	ROCK2	+	+			common -/+ PPase	A0A2R8Y7R9	A0A2R8Y7R9;Q13136-2;Q13136;E9PJZ7;E9PID5;E9PPF6;A0A3B3ITS2	A0A2R8Y7R9;Q13136-2;Q13136;E9PJZ7	Liprin-alpha-1	PPFIA1	+	+			21083	26806	26779	27594	20482	22669	21699	20609	3	3	3	4	4	4	138.52	0	8.6008	451920	4804	58	11	9	9	2	2
					A0A087WTS8;A0A087WYC1;P34932;P34932-2	P34932-2	+	+	RMI2	RMI2	+	+			common -/+ PPase	A0A2R8Y7W8	A0A2R8Y7W8;A0A2R8Y6W5;Q16626	A0A2R8Y7W8;A0A2R8Y6W5;Q16626	Male-enhanced antigen 1	MEA1	+	+			45910	60481	43069	59337	42242	45486	48014	50769	3	3	3	25.6	25.6	25.6	18.544	0	7.9321	983030	245760	4	12	9	9	2	3
					P34931;Q53FA3	P34931	+	+	RMDN3	RMDN3	+	+			common -/+ PPase	P62263	P62263;A0A2R8Y811;E5RH77	P62263;A0A2R8Y811;E5RH77	40S ribosomal protein S14	RPS14	+	+			266010	238780	241420	261140	190470	200640	170310	220170	8	8	8	34.4	34.4	34.4	16.273	0	29.378	10949000	281750	4	74	26	26	7	6
					E5RFH6;E5RFU2;P34913;P34913-2;P34913-3	P34913-3	+	+	RMDN1	RMDN1	+	+			common -/+ PPase	A0A2R8YDI1	A0A2R8YDI1;A0A2R8Y852;P39880-6;P39880-4;P39880-5;P39880-2;P39880;P39880-3;Q13948-2;Q13948;P39880-9;Q13948-9;Q13948-10	A0A2R8YDI1;A0A2R8Y852;P39880-6;P39880-4;P39880-5;P39880-2;P39880;P39880-3;Q13948-2;Q13948;P39880-9;Q13948-9;Q13948-10	Homeobox protein cut-like 1;Protein CASP	CUX1	+	+			10688	4587.6	10918	9057	10482	12957	11859	14681	5	5	5	6.6	6.6	6.6	148.57	0	6.9184	444020	2198.9	64	8	13	13	3	1
					G3V241;G3V2D2;G3V2E4;G3V2W0;G3V2Y1;G3V2Y4;G3V3C6;G3V3Y8;G3V4T0;G3V4W5;G3V4X0;G3V540;G3V5L0;H0YIZ0;P34897;P34897-2;P34897-3	P34897-3	+	+	RIPK2	RIPK2	+	+			common -/+ PPase	P08237-3	P08237-3;P08237;P08237-2;A0A2R8Y891;F8VZI0;F8VP00;F8VNX2;F8VVE3;F8VZQ1;F8VSF7;F8W1J8;F8VX13;F8VUB8;F8VSL1;F8VW30;F8VTQ3;F8VYK8	P08237-3;P08237;P08237-2;A0A2R8Y891;F8VZI0	ATP-dependent 6-phosphofructokinase, muscle type	PFKM	+	+			277820	255460	348990	327600	212840	222030	218800	226440	7	5	5	11.5	9.4	9.4	93.253	0	16.908	4239900	100880	36	51	26	26	5	7
					C9J8M6;P33993;P33993-2;P33993-3	P33993	+	+	RIPK1	RIPK1	+	+			common -/+ PPase	A0A2R8YCS7	A0A2R8YCS7;Q9Y3Z3-4;Q9Y3Z3;A0A2R8YD90;Q9Y3Z3-3;A0A2R8Y586;A0A2R8Y6J9;A0A2R8YF51;A0A2R8Y5D2	A0A2R8YCS7;Q9Y3Z3-4;Q9Y3Z3;A0A2R8YD90;Q9Y3Z3-3	Deoxynucleoside triphosphate triphosphohydrolase SAMHD1	SAMHD1	+	+			62473	70624	70613	74562	71866	79628	72906	74241	9	9	9	17.8	17.8	17.8	67.942	0	23.57	2178200	20352	33	44	33	33	6	7
					J3KRK5;J3KRZ5;P34896;P34896-2;P34896-3;P34896-4	P34896	+	+	RINT1	RINT1	+	+			common -/+ PPase	A0A2R8YGD1	A0A2R8YGD1;A0A2R8YD45;O14773-2;O14773;A0A2R8YDY1;A0A2R8Y7I4;A0A2R8Y7U1	A0A2R8YGD1;A0A2R8YD45;O14773-2;O14773;A0A2R8YDY1;A0A2R8Y7I4;A0A2R8Y7U1	Tripeptidyl-peptidase 1	TPP1	+	+			41042	42854	41589	43653	30831	30175	29601	43424	2	2	2	6	6	6	50.889	0	6.1985	876840	12780	18	19	8	8	2	2
					J3KNA1;P33176;Q12840	P33176	+	+	RING1	RING1	+	+			common -/+ PPase	P68400	P68400;E7EU96;A0A2R8YD58;A0A2R8YF43;A0A2R8Y5A0;Q8NEV1;A0A2R8YFU2;A0A2R8Y4D6;A0A2R8YDP2;A0A2R8Y4H0;V9GYA2;A0A2R8YDY7;P68400-2;A0A2R8YEW1;A0A2R8Y3W6;A0A2R8Y7T1;A0A087WY74;A0A2R8YCK2;A0A2R8YF47;V9GY80;A0A2R8YEL7;A0A2R8Y797;V9GYW6	P68400;E7EU96;A0A2R8YD58;A0A2R8YF43;A0A2R8Y5A0;Q8NEV1;A0A2R8YFU2;A0A2R8Y4D6;A0A2R8YDP2;A0A2R8Y4H0;V9GYA2	Casein kinase II subunit alpha;Casein kinase II subunit alpha 3	CSNK2A1;CSNK2A3	+	+			270070	279330	264250	271750	253860	240730	239760	231300	17	17	17	52.2	52.2	52.2	45.143	0	259.81	14442000	122930	18	102	62	62	13	12
					A0A0J9YWE8;A0A0J9YWZ2;P31946;P31946-2;Q4VY19;Q4VY20	P31946	+	+	RIN1	RIN1	+	+			common -/+ PPase	A0A2R8YDN7	A0A2R8YDN7;Q9H7F0;A0A087WYY3;A0A2R8Y635;Q9H7F0-2;H7C1U7	A0A2R8YDN7;Q9H7F0;A0A087WYY3;A0A2R8Y635;Q9H7F0-2	Probable cation-transporting ATPase 13A3	ATP13A3	+	+			37413	29365	26263	37276	32723	30083	35615	30553	3	3	2	4.5	4.5	3	138.82	0	6.6809	544950	11121	49	6	9	9	2	2
					P31944	P31944	+	+	RIF1	RIF1	+	+			common -/+ PPase	A0A2R8YE82	A0A2R8YE82;C9J6G3;C9J7M1;O95749	A0A2R8YE82;C9J6G3;C9J7M1;O95749	Geranylgeranyl pyrophosphate synthase	GGPS1	+	+			6590.7	6784.7	8103.3	10007	20545	22982	26298	24795	1	1	1	8.6	8.6	8.6	20.171	0.0067789	1.7695	199670	19967	10	4	4	4	1	1
					D6R9D3;D6R9T0;D6RAM1;D6RBM0;D6RDL0;D6RDU3;D6RF17;D6RFM3;D6RIH9;D6RIT2;D6RIU0;D6RJ04;E5RGH4;E5RGV0;E5RJ94;E7EN40;E7EQJ0;E9PCY7;G8JLB6;H0YAQ2;H0YB39;H0YBD7;H0YBG7;P31943	P31943	+	+	RIC8A	RIC8A	+	+			common -/+ PPase	A0A2R8YEM3	A0A2R8YEM3;E7EQV9;E7ENU7;P61313;E7EX53;A0A2R8Y738;P61313-2	A0A2R8YEM3;E7EQV9;E7ENU7;P61313;E7EX53;A0A2R8Y738	Ribosomal protein L15;60S ribosomal protein L15	RPL15	+	+			158560	140650	166740	137520	178520	173540	184800	187180	5	5	5	21.9	21.9	21.9	19.968	0	92	7321400	265570	9	61	20	20	5	5
					P31942;P31942-2;P31942-3;P31942-4;P31942-5;P31942-6	P31942-6	+	+	RNASEH2A	RNASEH2A	+	+			common -/+ PPase	A0A2R8YF87	A0A2R8YF87;Q96AX1;H3BMM5;F5H6Y0;A0A2R8Y5U3	A0A2R8YF87;Q96AX1;H3BMM5;F5H6Y0	Vacuolar protein sorting-associated protein 33A	VPS33A	+	+			11301	19918	17098	12380	19304	20663	27657	22013	5	5	5	9.1	9.1	9.1	71.695	0	13.914	408190	5978.4	37	19	15	15	2	3
					B0QYD3;P31941;P31941-2;Q9UH17;Q9UH17-2;Q9UH17-3	P31941-2	+	+	RNASEH2B	RNASEH2B	+	+			common -/+ PPase	A0A2R8YFH5	A0A2R8YFH5;Q15437;Q5QPE1;Q5QPE2;A0A2R8YF30;A0A2R8Y633;A0A2R8Y7S7	A0A2R8YFH5;Q15437	Protein transport protein Sec23B	SEC23B	+	+			124130	102670	108300	116030	95393	90307	105120	97173	11	10	10	24	22.7	22.7	84.472	0	27.748	2347400	30418	37	39	30	30	8	4
					C9JLK0;F8WEF0;H7C1S2;P31939;P31939-2	P31939-2	+	+	ROCK1	ROCK1	+	+			common -/+ PPase	A0A2R8YGH5	A0A2R8YGH5;P61966;H7C1E4;P61966-2	A0A2R8YGH5;P61966;H7C1E4	AP-1 complex subunit sigma-1A	AP1S1	+	+			14205	13513	13793	10709	8396.1	10115	12176	15292	3	3	3	20.4	20.4	20.4	18.602	0	5.396	270230	27023	10	9	10	10	3	3
					H7BZL2;P31937	P31937	+	+	RNPS1	RNPS1	+	+			common -/+ PPase	A0A2U3TZH3	A0A2U3TZH3;Q05639;A0A2R8Y660;A0A2R8Y488;A0A2R8YDN5	A0A2U3TZH3;Q05639	Elongation factor 1-alpha 2	EEF1A2	+	+			3298600	2877500	4082500	4758100	3511400	4013900	3490600	3898000	24	11	11	57.7	33.7	33.7	54.34	0	184.08	156990000	3606800	23	391	90	90	18	20
					P31930	P31930	+	+	RNPEP	RNPEP	+	+			common -/+ PPase	A0A2U3TZL8	A0A2U3TZL8;H7BYN4;Q02241-2;Q02241;Q02241-3;A0A2R8Y531;H0YME6;H0YMJ4	A0A2U3TZL8;H7BYN4;Q02241-2;Q02241;Q02241-3	Kinesin-like protein;Kinesin-like protein KIF23	KIF23	+	+			41385	37853	43303	42603	31020	33214	31000	36240	8	8	8	16.3	16.3	16.3	92.682	0	21.059	2036300	19660	43	41	28	28	4	7
					A0A0A0MRF1;A0A1B0GXA2;A8MX96;C9J258;C9JC83;C9JHS6;C9JIF6;C9JIJ1;E7EVP8;J3KRI8;J3KSY8;J3QKW1;J3QLS6;M0QZK3;M0R0P9;P31751;P31751-2	P31751-2	+	+	RNMT	RNMT	+	+			common -/+ PPase	V9GYY3	V9GYY3;A0A384N5Y3;F5H2F4;P11586;V9GZ78;A0A494C1T2	V9GYY3;A0A384N5Y3;F5H2F4;P11586;V9GZ78;A0A494C1T2	C-1-tetrahydrofolate synthase, cytoplasmic;Methylenetetrahydrofolate dehydrogenase;Methenyltetrahydrofolate cyclohydrolase;Formyltetrahydrofolate synthetase;C-1-tetrahydrofolate synthase, cytoplasmic, N-terminally processed	MTHFD1	+	+			388000	389990	379810	377800	319800	321090	335870	330500	40	40	39	53.1	53.1	52.1	99.719	0	315.17	44937000	324220	52	288	148	148	36	35
					P31947;P31947-2	P31947	+	+	RNH1	RNH1	+	+			common -/+ PPase	A0A3B3IRI2	A0A3B3IRI2;P17812;A0A3B3IRQ8;A0A3B3ITF6;B4E1E0;P17812-2;A0A3B3ITB8;A0A3B3ISY3;A0A3B3ITH9	A0A3B3IRI2;P17812;A0A3B3IRQ8;A0A3B3ITF6;B4E1E0;P17812-2;A0A3B3ITB8	CTP synthase 1;CTP synthase	CTPS1	+	+			161370	149210	148560	144190	136330	152100	132050	138430	10	10	9	30	30	27.1	63.723	0	26.228	6003000	65417	28	73	34	34	7	7
					P32970;P32970-2	P32970-2	+	+	RNF40	RNF40	+	+			common -/+ PPase	A0A3B3IRK8	A0A3B3IRK8;Q9BYX4-2;Q9BYX4	A0A3B3IRK8;Q9BYX4-2;Q9BYX4	Interferon-induced helicase C domain-containing protein 1	IFIH1	+	+			7602.8	8603.6	7791.8	9808.2	8154.4	7662.2	9765.1	9167.4	1	1	1	2	2	2	112.28	0.0029042	2.0659	99085	1981.7	50	5	4	4	1	1
					A0A2R8Y5Y7;D6RAN4;E7ESE0;H0Y9R4;H0Y9V9;P32969	P32969	+	+	RNF214	RNF214	+	+			common -/+ PPase	A0A3B3IRL2	A0A3B3IRL2;O75629	A0A3B3IRL2;O75629	Protein CREG1	CREG1	+	+			56220	40671	53584	39321	61185	54931	36829	36966	1	1	1	8.2	8.2	8.2	28.058	0	11.487	678310	10372	11	12	4	4	1	1
					E2QRB3;J3KQ22;J3KTA8;J3QKT3;J3QKT4;J3QL23;J3QL24;J3QL32;J3QLK9;J3QR88;J3QRZ0;P32322;P32322-2;P32322-3	P32322-3	+	+	RNF213	RNF213	+	+			common -/+ PPase	A0A3B3IRL5	A0A3B3IRL5;C9J381;P20839-2;P20839-4;P20839;P20839-3;P20839-7;P20839-5;P20839-6;C9K0R9	A0A3B3IRL5;C9J381;P20839-2;P20839-4;P20839;P20839-3;P20839-7;P20839-5;P20839-6	Inosine-5-monophosphate dehydrogenase;Inosine-5-monophosphate dehydrogenase 1	IMPDH1	+	+			33070	22470	20100	13924	15689	27949	25411	20722	3	3	3	12.6	12.6	12.6	54.272	0.0003012	4.2232	392900	6705.3	23	6	8	8	3	2
					D6RBJ9;P32321;P32321-2	P32321-2	+	+	RNF20	RNF20	+	+			common -/+ PPase	Q14643	Q14643;Q14643-6;A0A3B3IRP0;A0A3B3IU13;A0A3B3IU05;A0A3B3ITQ1;A0A3F2YNW8;A0A3B3IU04;A0A3B3ITU8;Q14643-2;Q14643-8;Q14643-5;Q14643-7;Q14643-3;Q14643-4;A0A3B3IS59;A0A3B3ISE3;A0A3B3ISR4	Q14643;Q14643-6;A0A3B3IRP0;A0A3B3IU13;A0A3B3IU05;A0A3B3ITQ1;A0A3F2YNW8;A0A3B3IU04;A0A3B3ITU8;Q14643-2;Q14643-8;Q14643-5;Q14643-7;Q14643-3;Q14643-4;A0A3B3IS59;A0A3B3ISE3;A0A3B3ISR4	Inositol 1,4,5-trisphosphate receptor type 1	ITPR1	+	+			9759.6	15475	22521	14927	16536	13462	15984	11871	2	2	2	1.1	1.1	1.1	313.93	0.00051948	2.729	233950	546.07	138	5	6	6	1	2
					A6NIW5;P32119;P32119-2	P32119-2	+	+	RNF2	RNF2	+	+			common -/+ PPase	A0A3B3IRT8	A0A3B3IRT8;P43307-2;P43307;C9J3L8;C9J5W0;E9PAL7;C9IZQ1;C9JBX5	A0A3B3IRT8;P43307-2;P43307;C9J3L8;C9J5W0;E9PAL7;C9IZQ1	Translocon-associated protein subunit alpha	SSR1	+	+			37315	39390	33209	49533	42436	43449	38479	36331	4	4	4	17	17	17	32.449	0	9.8115	840490	39908	11	15	11	11	2	4
					F5GXD8;F5H783;H0YGI8;P31948;P31948-2;P31948-3	P31948	+	+	BAP18;C17orf49;RNASEK-C17orf49	RNASEK-C17orf49	+	+			common -/+ PPase	A0A3B3IS06	A0A3B3IS06;J3KQ96;E7ETY2;Q13428-2;Q13428-8;Q13428-6;Q13428-7;Q13428;Q13428-3;Q13428-4;H0Y8Y7;Q13428-5;A0A2R8Y857;H0YA99;A0A2R8Y4M7;H0YAB7	A0A3B3IS06;J3KQ96;E7ETY2;Q13428-2;Q13428-8;Q13428-6;Q13428-7;Q13428;Q13428-3;Q13428-4;H0Y8Y7;Q13428-5	Treacle protein	TCOF1	+	+			68164	60827	47260	50010	56223	43950	46675	43058	11	11	11	17.4	17.4	17.4	138.69	0	21.988	1578500	10330	67	39	15	15	5	4
					P31949	P31949	+	+	RNASEH2C	RNASEH2C	+	+			common -/+ PPase	A0A3B3ISG5	A0A3B3ISG5;P14735;P14735-2;Q5T5N3	A0A3B3ISG5;P14735;P14735-2	Insulin-degrading enzyme	IDE	+	+			106690	111220	110860	98878	108420	112410	111890	104530	19	19	19	25.4	25.4	25.4	117.94	0	184.88	6124100	38667	53	96	60	60	15	15
					B4DYB8;F5GX71;H3BMZ9;H3BN01;H3BNY8;H3BP57;H3BPB8;H3BPM5;H3BPP3;H3BPU7;H3BQX0;H3BT46;H3BT48;H3BU66;H3BUG1;H3BUZ9;P34949;P34949-2	P34949	+	+	RANBP10	RANBP10	+	+			common -/+ PPase	Q16795	Q16795;A0A3B3ISG8;F5GY40	Q16795;A0A3B3ISG8	NADH dehydrogenase [ubiquinone] 1 alpha subcomplex subunit 9, mitochondrial	NDUFA9	+	+			11664	19025	11007	17009	55115	60409	65258	66807	4	4	4	16.2	16.2	16.2	42.509	0	18.347	767000	22420	27	19	10	10	2	2
					D6R997;D6RBG7;D6RBT6;D6RBZ7;D6RCL6;H0Y938;H0YAC7;P35606;P35606-2	P35606-2	+	+	PWP2	PWP2	+	+			common -/+ PPase	F5H5A1	F5H5A1;A0A3B3ISK9;Q4G176;F5H362;F5H755	F5H5A1;A0A3B3ISK9;Q4G176;F5H362;F5H755	Acyl-CoA synthetase family member 3, mitochondrial	ACSF3	+	+			11794	12167	11270	8545.1	15514	14327	16572	18157	2	2	2	9.6	9.6	9.6	35.142	0.00029735	4.0727	210370	10519	20	8	7	7	1	1
					E7ERA5;P35580;P35580-2;P35580-3;P35580-4;P35580-5	P35580-5	+	+	PWP1	PWP1	+	+			common -/+ PPase	A0A3B3IT57	A0A3B3IT57;E9PH64;E7EWZ0;E9PF49;Q9Y6M9	A0A3B3IT57;E9PH64;E7EWZ0;E9PF49;Q9Y6M9	NADH dehydrogenase [ubiquinone] 1 beta subcomplex subunit 9	NDUFB9	+	+			22632	25211	34222	35170	42868	33495	40408	43414	2	2	2	21	21	21	17.16	0	6.774	1030600	95080	7	15	8	8	2	2
					A0A494C031;A0A494C033;A0A494C0Q3;A0A494C166;A0A494C1A0;G3V2E8;G3V2N5;G3V2W4;G3V2X9;G3V380;G3V5M4;H0YJ11;H0YJW3;H7C5W8;H9KV75;P12814;P12814-2;P12814-3;P12814-4;P35609;P35609-2	P35609	+	+	PVR	PVR	+	+			common -/+ PPase	A0A3B3IU45	A0A3B3IU45;A0A3B3IT92;P33991;A0A3B3IS57;E5RG31;A0A3B3ITP6;A0A3B3IRR8;A0A494C100;Q9UJA3-2;Q9UJA3-3;Q9UJA3;Q9UJA3-4	A0A3B3IU45;A0A3B3IT92;P33991;A0A3B3IS57;E5RG31;A0A3B3ITP6	DNA replication licensing factor MCM4	MCM4	+	+			254680	268000	265700	271740	234710	240890	248700	250170	27	27	27	42.8	42.8	42.8	91.19	0	323.31	22360000	221040	43	221	95	95	21	17
					B1AH99;P35579;P35579-2;Q5BKV1	P35579-2	+	+	PUS7	PUS7	+	+			common -/+ PPase	A0A3B3ITE1	A0A3B3ITE1;Q9UDY2-6;Q9UDY2;A0A3B3IU51;Q9UDY2-2;A0A3B3ISZ5;A0A3B3ISF1;A0A1B0GTW1;A0A2R8YDH4;Q9UDY2-5;Q9UDY2-7;A0A3B3IT83;A0A3B3IS03	A0A3B3ITE1;Q9UDY2-6;Q9UDY2;A0A3B3IU51;Q9UDY2-2;A0A3B3ISZ5;A0A3B3ISF1;A0A1B0GTW1;A0A2R8YDH4;Q9UDY2-5;Q9UDY2-7;A0A3B3IT83;A0A3B3IS03	Tight junction protein ZO-2	TJP2	+	+			166100	164580	135490	147700	141710	138680	137860	149020	26	26	3	35.7	35.7	1.8	134.21	0	176.98	10374000	25878	65	121	69	69	18	19
					A0A1C7CYW1;P35573;P35573-2;P35573-3	P35573-3	+	+	PUS1	PUS1	+	+			common -/+ PPase	M0QXS5	M0QXS5;A0A3B3ITJ4;P14866;P14866-2;M0QYL7;M0R1W6;B4DVF8	M0QXS5;A0A3B3ITJ4;P14866;P14866-2	Heterogeneous nuclear ribonucleoprotein L	HNRNPL	+	+			272620	257810	286040	277380	302260	314760	292380	299270	12	12	6	36.8	36.8	28.3	58.362	0	154.59	19368000	145860	19	102	40	40	11	10
					A0A0A0MS74;H0YM31;H0YMA5;H0YML5;H0YMU6;H0YNG4;P35558;P35558-2;Q16822;Q16822-2;Q16822-3	P35558-2	+	+	PURA	PURA	+	+			common -/+ PPase	A0A3B3ITL1	A0A3B3ITL1;Q8WUD1;Q8WUD1-2	A0A3B3ITL1;Q8WUD1;Q8WUD1-2	Ras-related protein Rab-2B	RAB2B	+	+			100480	84742	102410	103140	105500	110620	98848	104750	7	1	1	38.5	6.7	6.7	23.341	0.001992	2.3607	3929900	205500	14	45	23	23	4	3
					P35270	P35270	+	+	PUM2	PUM2	+	+			common -/+ PPase	A0A3B3ITR6	A0A3B3ITR6;O95363	A0A3B3ITR6;O95363	Phenylalanine--tRNA ligase, mitochondrial	FARS2	+	+			25978	31627	12621	14280	34532	16264	22696	17614	1	1	1	4.6	4.6	4.6	50.075	0.00028482	3.5697	280120	13339	21	8	4	4	1	1
					A0A1C7CYY0;C9J080;C9J299;C9JTM0;P35612;P35612-2;P35612-3;P35612-4;P35612-5;P35612-6;P35612-7;P35612-8;P35612-9	P35612-7	+	+	PUF60	PUF60	+	+			common -/+ PPase	E9PIQ6	E9PIQ6;A0A3B3ITS5;Q14181	E9PIQ6;A0A3B3ITS5;Q14181	DNA polymerase alpha subunit B	POLA2	+	+			7217.1	6075.9	4872.7	6361.8	10251	10145	8950.3	10762	2	2	2	13	13	13	15.895	0	7.4695	157020	13673	7	6	7	7	1	1
					A0A0A0MSR2;D6RAH3;D6RF25;D6RJE2;E7ENY0;E7EV99;H0Y9H2;P35611;P35611-2;P35611-3;P35611-4;P35611-5;P35611-6	P35611-6	+	+	PTRH2	PTRH2	+	+			common -/+ PPase	A0A3B3ITZ9	A0A3B3ITZ9;Q9Y2W1	A0A3B3ITZ9;Q9Y2W1	Thyroid hormone receptor-associated protein 3	THRAP3	+	+			134450	172190	171510	126510	122710	141240	123950	132560	8	8	8	12.7	12.7	12.7	103.52	0	47.932	2728700	3522.5	41	37	14	14	4	2
					B1APM4;P35610;P35610-2;P35610-3	P35610	+	+	PTRH1	PTRH1	+	+			common -/+ PPase	A0A3B3IU42	A0A3B3IU42	A0A3B3IU42			+	+			27809	26314	26907	17762	53770	60113	69912	63594	1	1	1	5.5	5.5	5.5	30.761	0.00028662	3.6342	552940	46079	12	8	4	4	1	1
					M0QXD6;M0R0R9;M0R0Z3;P35269	P35269	+	+	PTRF	PTRF	+	+			common -/+ PPase	A0A3B3IUA2	A0A3B3IUA2;B1AHD1;P55769;A0A3B3IRU2;A0A3B3ISK4	A0A3B3IUA2;B1AHD1;P55769;A0A3B3IRU2	NHP2-like protein 1;NHP2-like protein 1, N-terminally processed	NHP2L1	+	+			35879	42535	40927	43603	66332	72565	69255	80638	4	4	4	14.7	14.7	14.7	30.162	0	15.284	1339100	96225	12	15	11	11	1	1
					K7EJT5;K7EKS7;K7ELC4;K7EMH1;K7EP65;K7ERI7;P35268	P35268	+	+	PTPRF	PTPRF	+	+			common -/+ PPase	A0A3B3IUB1	A0A3B3IUB1;Q13144;A0A3B3IS56;A0A3B3IRP4;A0A3B3IUF2;A0A3B3ISM8;A0A3B3ISX3;A0A3B3ITG6;A0A3B3ITK8;A0A3B3IST9;A0A3B3ISI2;A0A3B3ISS1;A0A3B3ISV1;A0A3B3ITQ2;C9JRD9;A0A3B3IT53	A0A3B3IUB1;Q13144;A0A3B3IS56;A0A3B3IRP4;A0A3B3IUF2;A0A3B3ISM8;A0A3B3ISX3;A0A3B3ITG6;A0A3B3ITK8;A0A3B3IST9;A0A3B3ISI2;A0A3B3ISS1;A0A3B3ISV1;A0A3B3ITQ2	Translation initiation factor eIF-2B subunit epsilon	EIF2B5	+	+			30910	29508	25578	20971	25222	21277	22906	22794	6	6	6	13.3	13.3	13.3	81.222	0	13.343	748910	17340	30	15	18	18	3	4
					P35240;P35240-10;P35240-2;P35240-3;P35240-4;P35240-5;P35240-6;P35240-7;P35240-8;P35240-9	P35240-10	+	+	PTPRE	PTPRE	+	+			common -/+ PPase	A0A3B3IUC4	A0A3B3IUC4;P06280;A0A3B3IRU3;V9GYN5	A0A3B3IUC4;P06280;A0A3B3IRU3;V9GYN5	Alpha-galactosidase A	GLA	+	+			20441	23006	25298	18168	6219.3	10275	9744	11102	2	2	2	4.9	4.9	4.9	53.283	0.00026717	2.9861	247100	5962.5	27	11	7	7	1	2
					A0A2R8Y517;A0A2R8Y5S1;A0A2R8Y6N4;A0A2R8YDD0;P35237	P35237	+	+	PYCR1	PYCR1	+	+			common -/+ PPase	A0A3B3IUD2	A0A3B3IUD2;Q9BUK6-7;Q9BUK6-3;Q9BUK6-2;Q9BUK6;Q9BUK6-5;REV__P04114;Q9BUK6-4	A0A3B3IUD2;Q9BUK6-7;Q9BUK6-3;Q9BUK6-2;Q9BUK6;Q9BUK6-5	Protein misato homolog 1	MSTO1	+	+			11169	7479.2	6517.4	17126	16501	9634.4	12750	9126.1	4	4	4	7.2	7.2	7.2	60.645	0	6.2552	248910	5740.8	25	9	11	11	1	1
					C9JW96;C9JZ20;D6RBK0;E7ESE2;E9PCW0;P35232;P35232-2	P35232-2	+	+	PYCR2	PYCR2	+	+			common -/+ PPase	A0A3F2YNX0	A0A3F2YNX0;A0A3F2YNZ0;F1T0I1;O15027-2;O15027-4;O15027-3;O15027;O15027-5;X6RGP5;A0A0C4DH09;Q8N9G1	A0A3F2YNX0;A0A3F2YNZ0;F1T0I1;O15027-2;O15027-4;O15027-3;O15027;O15027-5;X6RGP5	Protein transport protein Sec16A	SEC16A	+	+			80527	76624	67179	43296	61303	58252	66043	64502	10	10	10	9.7	9.7	9.7	228.87	0	91.975	2410600	12238	76	35	28	28	5	7
					A0A087X259;H0Y4W0;H0Y6Z9;J3KT13;P35226;P35227;Q5T8Z1;Q5T8Z4;Q5T8Z6;Q9UBI1;R4GMW6;R4GMX3;R4GN06;R4GN54	P35227	+	+	QSOX1	QSOX1	+	+			common -/+ PPase	A0A3F2YNX7	A0A3F2YNX7;Q7L5Y1-2;Q7L5Y1;Q7L5Y1-4;Q7L5Y1-5;R4GNF8;J3QL81;Q7L5Y1-7;Q7L5Y1-6	A0A3F2YNX7;Q7L5Y1-2;Q7L5Y1;Q7L5Y1-4;Q7L5Y1-5;R4GNF8;J3QL81;Q7L5Y1-7;Q7L5Y1-6	Mitochondrial enolase superfamily member 1	ENOSF1	+	+			20512	19863	21330	16031	20092	18158	20354	21521	2	2	2	6.7	6.7	6.7	53.063	0	6.65	390960	16998	23	8	8	8	2	2
					A0A2R8Y543;A0A2R8Y5A3;A0A2R8Y5C3;A0A2R8Y5Z1;A0A2R8Y6G0;A0A2R8Y750;A0A2R8Y7Z0;A0A2R8Y804;A0A2R8YCH5;A0A2R8YG06;B4DGU4;E7EMJ5;E7EV28;E9PDF9;P35222	P35222	+	+	QRSL1	QRSL1	+	+			common -/+ PPase	A0A3F2YNY6	A0A3F2YNY6;O75400-2;O75400;O75400-3;H7C2N3;F5H578	A0A3F2YNY6;O75400-2;O75400;O75400-3	Pre-mRNA-processing factor 40 homolog A	PRPF40A	+	+			44169	47682	42312	42210	38303	42212	45810	41634	9	9	9	11	11	11	112.4	0	34.355	2496800	35977	36	41	34	34	7	8
					A0A0A0MRI5;A0A0A0MTJ6;E5RFM3;E5RG03;E5RGY6;E5RGY7;E5RHV7;E5RIB1;E5RIE0;E5RJL0;G3XAM7;H0YBB8;P26232-4;P26232-6;P35221;P35221-2;P35221-3;Q9UI47	P35221-3	+	+	QRICH1	QRICH1	+	+			common -/+ PPase	E9PLD3	E9PLD3;A0A494BXY3;E9PRG8	E9PLD3;A0A494BXY3;E9PRG8	Uncharacterized protein C11orf98	C11orf98	+	+			38229	38167	48872	49163	40510	43691	43227	42360	1	1	1	13.1	13.1	13.1	11.6	0.0058672	1.8105	498600	124650	4	5	4	4	1	1
					C9J0J7;G5E9Q6;P35080-2	P35080-2	+	+	QKI	QKI	+	+			common -/+ PPase	A0A494BZT8	A0A494BZT8;Q9Y6A5;C9JA91;E7EMT0	A0A494BZT8;Q9Y6A5	Transforming acidic coiled-coil-containing protein 3	TACC3	+	+			17952	14410	14797	13529	12514	16031	15967	16897	5	5	5	10.1	10.1	10.1	89.871	0	9.8217	656910	4436.9	34	21	12	12	3	3
					C9J2N0;C9J712;C9JQ45;P35080	P35080	+	+	C19orf70;QIL1	QIL1	+	+			common -/+ PPase	Q5FC05	Q5FC05;D6RH03;A0A494BZU0;P40189-2;P40189-3;P40189	Q5FC05;D6RH03;A0A494BZU0;P40189-2;P40189-3;P40189	Interleukin-6 receptor subunit beta	IL6ST	+	+			14970	15778	18737	19144	15721	15682	14822	11232	1	1	1	8.4	8.4	8.4	23.033	0.00051454	2.6372	179550	19950	9	4	4	4	1	1
					C9J4Y6;H7BZE9;H7BZL4;H7C024;H7C410;P35052;P35052-2	P35052-2	+	+	QDPR	QDPR	+	+			common -/+ PPase	J3KSW8	J3KSW8;H0Y2S9;A0A494BZV2;Q6WCQ1-3;Q6WCQ1;Q6WCQ1-2;H0Y7E2;H7C3G6;K7EL39;J3QRL2	J3KSW8;H0Y2S9;A0A494BZV2;Q6WCQ1-3;Q6WCQ1;Q6WCQ1-2;H0Y7E2;H7C3G6	Myosin phosphatase Rho-interacting protein	MPRIP	+	+			20875	24236	26565	34073	22192	25587	23353	27868	5	5	5	11.5	11.5	11.5	95.928	0	8.8283	709320	3290.2	53	12	16	16	3	3
					A0A087WVY3;F8WC37;H7C596;H7C5A0;H7C5G4;H7C5P4;H7C5Q7;P35250;P35250-2	P35250-2	+	+	QARS	QARS	+	+			common -/+ PPase	H0YAC6	H0YAC6;A0A494BZW2;E9PEM5;A0A494C1L5;P50851-2;P50851;A0A3B3IU76;A0A3B3IS13;Q8NFP9-3	H0YAC6;A0A494BZW2;E9PEM5;A0A494C1L5;P50851-2;P50851	Lipopolysaccharide-responsive and beige-like anchor protein	LRBA	+	+			39985	39901	35968	38240	24127	29836	30465	29340	3	3	2	2.8	2.8	1.7	166.8	0	8.253	804140	10265	70	23	12	12	3	3
					C9J8M3;C9JGY5;C9JTT7;C9JXZ7;C9JZI1;F8WE44;H7C1P0;P35249;P35249-2	P35249-2	+	+	PZP	PZP	+	+			common -/+ PPase	A0A494C017	A0A494C017;C9JJV6;C9JZL8;C9J5M0;C9JC07;Q96S97	A0A494C017;C9JJV6;C9JZL8;C9J5M0;C9JC07;Q96S97	Myeloid-associated differentiation marker	MYADM	+	+			77558	78123	99359	67184	71754	80340	14113	70472	1	1	1	18.9	18.9	18.9	13.153	0	38.178	1204800	224990	4	17	4	4	1	1
					B5MC59;P35244	P35244	+	+	PYROXD1	PYROXD1	+	+			common -/+ PPase	H0Y993	H0Y993;A0A494C028;P35659;H0Y8X0;A0A494C198;B4DFG0;P35659-2;D6RDA2;D6R9L5	H0Y993;A0A494C028;P35659;H0Y8X0;A0A494C198;B4DFG0;P35659-2	Protein DEK	DEK	+	+			114260	100540	92994	123010	111890	112730	109350	124400	7	7	7	21.6	21.6	21.6	43.247	0	24.768	3462200	91145	22	32	23	23	5	4
					A0A2R8Y4H6;A0A2R8Y5P0;A0A2R8Y5S7;A0A2R8Y7M3;E9PKN5;E9PNP4;E9PNV3;E9PQ82;P35241;P35241-2;P35241-3;P35241-5	P35241-5	+	+	PYGL	PYGL	+	+			common -/+ PPase	A0A494C0A8	A0A494C0A8;A0A494C1M6;A0A494C148;A0A494C045;Q9UHD2;A0A494C079;A0A494C0R4;A0A494C0X2;A0A494C167;A0A494BZY3;F5H206;F5H1A3;A0A494C1I2	A0A494C0A8;A0A494C1M6;A0A494C148;A0A494C045;Q9UHD2;A0A494C079;A0A494C0R4;A0A494C0X2;A0A494C167	Serine/threonine-protein kinase TBK1	TBK1	+	+			18515	20291	16670	18903	22311	21409	16084	20948	3	3	3	10.9	10.9	10.9	62.552	0	23.797	411080	7823	31	13	10	10	2	2
					A0A087WY56;G3V2I6;G3V3X1;P31749;P31749-2	P31749-2	+	+	PYGB	PYGB	+	+			common -/+ PPase	A0A494C0Q8	A0A494C0Q8;A0A494C085;P06132;A0A1B0GVN9;A0A494C0S8;A0A494BZY8;A0A1B0GVZ4;H0Y5R6;Q5T446	A0A494C0Q8;A0A494C085;P06132;A0A1B0GVN9;A0A494C0S8;A0A494BZY8;A0A1B0GVZ4	Uroporphyrinogen decarboxylase	UROD	+	+			59131	41478	44400	44572	98647	103240	97190	95507	7	7	7	37.7	37.7	37.7	36.86	0	44.548	2020100	6611.4	14	33	17	17	4	4
					H3BRN3;H3BT29;H3BT57;H3BUJ5;H3BVD2;P29590;P29590-10;P29590-11;P29590-12;P29590-13;P29590-14;P29590-2;P29590-3;P29590-4;P29590-5;P29590-8;P29590-9	P29590-8	+	+	PTPN6	PTPN6	+	+			common -/+ PPase	A0A494C0G5	A0A494C0G5;O00468-6;O00468-3;A0A087X208;A0A494C1I6;O00468-2;O00468-5;O00468-4;O00468-7;O00468	A0A494C0G5;O00468-6;O00468-3;A0A087X208;A0A494C1I6;O00468-2;O00468-5;O00468-4;O00468-7;O00468	Agrin;Agrin N-terminal 110 kDa subunit;Agrin C-terminal 110 kDa subunit;Agrin C-terminal 90 kDa fragment;Agrin C-terminal 22 kDa fragment	AGRN	+	+			13474	11059	14475	14032	11368	9258.4	9595.5	10048	4	4	4	2.4	2.4	2.4	203.09	0	8.1405	266190	2918.7	85	11	10	10	2	3
					P29508;P29508-2	P29508-2	+	+	PTBP1	PTBP1	+	+			common -/+ PPase	A0A494C0M1	A0A494C0M1;P52701-4;P52701-3;P52701;A0A087WWJ1;P52701-2;A0A087WYT6	A0A494C0M1;P52701-4;P52701-3;P52701;A0A087WWJ1;P52701-2	DNA mismatch repair protein Msh6	MSH6	+	+			80256	92924	81930	95530	60898	70952	67600	65234	11	11	11	12.3	12.3	12.3	142.85	0	28.938	2412200	27396	66	49	36	36	7	8
					A0A0B4J1R6;E9PFF2;F8W888;F8WAX4;P29401;P29401-2	P29401-2	+	+	PTAR1	PTAR1	+	+			common -/+ PPase	I3L2B0	I3L2B0;A0A494C0R8;K7EIG1;I3L4B5;I3L318	I3L2B0;A0A494C0R8;K7EIG1		CLUH	+	+			46160	38292	50991	46826	31687	32986	31405	28182	16	16	2	18.7	18.7	2.7	144.67	0	48.608	3007500	17780	67	57	52	52	10	12
					A0A087X1X7;E9PI39;E9PIZ1;E9PJD0;E9PK01;E9PK72;E9PKK3;E9PL12;E9PL71;E9PMW7;E9PN91;E9PNW6;E9PPR1;E9PQ49;E9PQC9;E9PQZ1;E9PRY8;H0YCK7;H0YE58;H0YE72;P29692;P29692-2;P29692-3	P29692	+	+	PSPH	PSPH	+	+			common -/+ PPase	O95453	O95453;O95453-2;A0A494C0W0;A0A494C0P9;A0A494C0K5;A0A494C1N1;A0A494C0Q2;A0A494C0Q6;A0A494C1K5;A0A494BZW7;A0A494BZU6;A0A494C156;O95453-4;O95453-3;A0A494C002;A0A494C1G3;H3BRK1	O95453;O95453-2;A0A494C0W0;A0A494C0P9;A0A494C0K5;A0A494C1N1;A0A494C0Q2;A0A494C0Q6;A0A494C1K5;A0A494BZW7;A0A494BZU6;A0A494C156;O95453-4;O95453-3	Poly(A)-specific ribonuclease PARN	PARN	+	+			23106	40450	40468	68427	45208	39733	41643	28142	3	3	3	7.7	7.7	7.7	73.45	0	9.2605	810610	5137.6	29	11	10	10	1	2
					P30048;P30048-2	P30048	+	+	PSPC1	PSPC1	+	+			common -/+ PPase	A0A494C108	A0A494C108;Q8N9T8;H0YFD2;F8WFC1	A0A494C108;Q8N9T8;H0YFD2;F8WFC1	Protein KRI1 homolog	KRI1	+	+			11055	11394	9460.2	7808.5	10124	10796	24692	13759	2	2	2	5.9	5.9	5.9	83.251	0.00028818	3.6872	160650	4631.2	28	5	6	6	1	2
					P30044;P30044-2;P30044-3;P30044-4	P30044-4	+	+	PSMG4	PSMG4	+	+			common -/+ PPase	A0A494C146	A0A494C146;P50336;A0A494C0M9;D3DVG2;A0A1W2PRF9;A0A494C0D4;A0A494C134;H0YFP3	A0A494C146;P50336;A0A494C0M9;D3DVG2;A0A1W2PRF9;A0A494C0D4	Protoporphyrinogen oxidase	PPOX	+	+			22853	32081	37599	25987	28344	26173	27538	32321	4	4	4	20.9	20.9	20.9	46.457	0	9.3676	775750	26416	24	13	15	15	3	1
					A0A2R8Y7Y9;A0A2R8YEP4;M0QZL1;M0R192;P30043	P30043	+	+	PSMG3	PSMG3	+	+			common -/+ PPase	A0A494C1B8	A0A494C1B8;Q5VZU9;P29144;A0A494C0U1;A0A494C1S4;A0A494C1S6;A0A494C0A3	A0A494C1B8;Q5VZU9;P29144;A0A494C0U1	Tripeptidyl-peptidase 2	TPP2	+	+			172070	160750	165820	238130	179850	185490	145970	120960	10	10	10	16.1	16.1	16.1	130.29	0	32.096	2600500	8271.7	59	38	21	21	5	5
					P30041	P30041	+	+	PSMG2	PSMG2	+	+			common -/+ PPase	A0A494C1E0	A0A494C1E0;Q15031;E9PHM2;C9JYR8	A0A494C1E0;Q15031;E9PHM2	Probable leucine--tRNA ligase, mitochondrial	LARS2	+	+			54044	50943	60063	32677	44794	46973	50198	56684	6	6	6	19.1	19.1	19.1	67.409	0	12.442	1123400	28724	33	17	17	17	5	5
					F8VY02;F8W1G0;P30040;P30040-2	P30040-2	+	+	PSMG1	PSMG1	+	+			common -/+ PPase	A0A494C1F2	A0A494C1F2;P35658-2;P35658-4;P35658;P35658-3;P35658-5;A0A0A0MSW3;H0YF36;E9PKD2;B7ZAV2;H0Y837	A0A494C1F2;P35658-2;P35658-4;P35658;P35658-3;P35658-5;A0A0A0MSW3	Nuclear pore complex protein Nup214	NUP214	+	+			56953	64895	60723	58634	47085	49272	47593	45821	12	12	11	8.5	8.5	7.6	212.48	0	120.35	2406300	12037	74	44	41	41	8	9
					E9PK06;P29692-4	P29692-4	+	+	PSME4	PSME4	+	+			common -/+ PPase	C9J8U1	C9J8U1;F8WAN1;A0A494C1J1;Q69YQ0-2;Q69YQ0	C9J8U1;F8WAN1;A0A494C1J1;Q69YQ0-2;Q69YQ0	Cytospin-A	SPECC1L;SPECC1L-ADORA2A	+	+			12695	24910	21032	15243	9553.7	16707	11446	16600	2	2	2	6.6	6.6	6.6	88.181	0.00030544	4.3976	204650	2293.4	40	6	5	5	2	2
					P29373;Q5SYZ4	P29373	+	+	PSME3	PSME3	+	+			common -/+ PPase	A0A494C1L1	A0A494C1L1;Q14739;C9JXK0;C9JES9	A0A494C1L1;Q14739;C9JXK0	Lamin-B receptor	LBR	+	+			57967	65432	81316	67086	63364	65476	60759	66888	5	5	5	19.2	19.2	19.2	46.925	0	9.783	1760700	47026	18	22	15	15	3	4
					A0A087WVZ3;B1AM21;K7EL62;O95837;P29992	P29992	+	+	PSME2	PSME2	+	+			common -/+ PPase	A0A494C1N0	A0A494C1N0;P26885	A0A494C1N0;P26885	Peptidyl-prolyl cis-trans isomerase FKBP2	FKBP2	+	+			26655	18573	29870	30685	26662	44354	35191	24394	2	2	2	21.1	21.1	21.1	18.562	0.00030731	4.5033	544840	32772	8	8	7	7	2	2
					P30038;P30038-2;P30038-3;Q5TF55	P30038	+	+	PTBP3	PTBP3	+	+			common -/+ PPase	A0AVT1	A0AVT1;A0AVT1-2;H0Y8S8;A0AVT1-4;A0AVT1-3;H0Y9U5	A0AVT1;A0AVT1-2	Ubiquitin-like modifier-activating enzyme 6	UBA6	+	+			145060	145930	175150	150650	129560	129370	135610	137060	14	14	14	18.9	18.9	18.9	117.97	0	44.329	6215100	61058	56	64	46	46	11	8
					A2IDA3;P29372;P29372-2;P29372-4;P29372-5	P29372-5	+	+	PTCD3	PTCD3	+	+			common -/+ PPase	A0MZ66-4	A0MZ66-4;A0MZ66-6;A0MZ66;A0MZ66-3;A0MZ66-8;A0MZ66-5;A0MZ66-2;A0MZ66-7	A0MZ66-4;A0MZ66-6;A0MZ66;A0MZ66-3;A0MZ66-8;A0MZ66-5;A0MZ66-2	Shootin-1	KIAA1598	+	+			132010	129540	140230	142910	113670	140510	120640	127320	13	13	13	27.8	27.8	27.8	63.496	0	66.283	3518300	25305	32	55	35	35	9	7
					E5RG13;E5RG94;E5RGY4;E5RHE9;E5RI82;E5RIF4;E5RIP7;H0YBL1;P29218;P29218-2;P29218-3	P29218	+	+	PTPN23	PTPN23	+	+			common -/+ PPase	A1L0T0	A1L0T0;M0R026;E9PL44;M0QZX5;E9PJS0;M0R1B5	A1L0T0;M0R026	Acetolactate synthase-like protein	ILVBL	+	+			25343	39875	32366	32987	47918	53558	50415	57962	8	8	8	24.5	24.5	24.5	67.867	0	24.466	1742600	18353	25	40	23	23	6	5
					A0A494C0A3;A0A494C0U1;A0A494C1B8;A0A494C1S4;A0A494C1S6;P29144;Q5VZU9	P29144	+	+	PTPN2	PTPN2	+	+			common -/+ PPase	A2A274	A2A274;Q99798	A2A274;Q99798	Aconitate hydratase, mitochondrial	ACO2	+	+			309960	321880	312570	346220	256560	259080	262020	280860	19	19	19	34.4	34.4	34.4	87.819	0	138.65	16310000	161370	39	113	67	67	15	15
					E5RH41;P29084	P29084	+	+	PTPN12	PTPN12	+	+			common -/+ PPase	A2A2D0	A2A2D0;P16949;P16949-2;E5RGX5;Q93045;Q93045-2	A2A2D0;P16949;P16949-2	Stathmin	STMN1	+	+			315190	297480	417660	371830	397370	398380	376280	423660	10	10	10	83.5	83.5	83.5	9.7931	0	118.37	13150000	1416900	6	81	36	36	8	8
					C9IYL4;C9J329;E9PER7;P29083	P29083	+	+	PTPN11	PTPN11	+	+			common -/+ PPase	A2A2Q9	A2A2Q9;Q9Y312	A2A2Q9;Q9Y312	Protein AAR2 homolog	AAR2	+	+			43993	15764	33622	32727	26523	23585	25011	26645	6	6	5	22.4	22.4	19.3	45.034	0	12.5	842080	25856	20	22	15	15	3	3
					H0Y983;H0Y9Q1;P28838;P28838-2	P28838-2	+	+	PTPN1	PTPN1	+	+			common -/+ PPase	A2A3N6	A2A3N6	A2A3N6	Putative PIP5K1A and PSMD4-like protein	PIPSL	+	+			54935	51605	45182	59677	42002	41560	41912	40292	5	1	0	5.2	1.7	0	95.047	0.00029231	3.8288	1044600	21699	32	14	12	12	4	4
					H7BXD5;H7C2Z6;P28676	P28676	+	+	PTMA	PTMA	+	+			common -/+ PPase	A2ACR1	A2ACR1;P28065-2;P28065;A0A0G2JJA7;A2ACR0;A0A0G2JJQ0;A0A0G2JJ13;A0A0G2JHI2	A2ACR1;P28065-2;P28065;A0A0G2JJA7;A2ACR0	Proteasome subunit beta type;Proteasome subunit beta type-9	PSMB9	+	+			67588	66534	76903	63124	69277	70998	69277	67983	6	6	6	41.8	41.8	41.8	20.96	0	17.312	2266800	162550	10	32	19	19	4	4
					P28482;P28482-2	P28482-2	+	+	QSOX2	QSOX2	+	+			common -/+ PPase	A2IDA3	A2IDA3;P29372-5;P29372-4;P29372-2;P29372	A2IDA3;P29372-5;P29372-4;P29372-2;P29372	DNA-3-methyladenine glycosylase	MPG	+	+			22058	20587	25826	26345	22114	24864	31650	22050	2	2	2	10.8	10.8	10.8	27.295	0.00028433	3.5591	422350	32489	13	7	8	8	1	2
					A0A0A0MRP6;B7ZLQ5;O60264;P28370;P28370-2	P28370-2	+	+	PTK7	PTK7	+	+			common -/+ PPase	A2RRP1-2	A2RRP1-2;A2RRP1;H0Y5G7;H7BZU5;C9JCM7	A2RRP1-2;A2RRP1;H0Y5G7	Neuroblastoma-amplified sequence	NBAS	+	+			73386	72780	73568	71750	59232	63338	67798	67172	9	9	8	5.6	5.6	4.8	254.81	0	20.409	1730900	10617	101	41	29	29	6	7
					A0A2R8Y705;A0A2R8Y7K6;M0QXE6;M0QXQ2;M0QZB4;M0QZR8;M0R2B7;M0R3H8;P28340	P28340	+	+	PTK2	PTK2	+	+			common -/+ PPase	A2RTX5	A2RTX5;A2RTX5-2;B7ZLP8	A2RTX5;A2RTX5-2;B7ZLP8	Probable threonine--tRNA ligase 2, cytoplasmic	TARSL2	+	+			189870	214450	241590	206920	193170	179050	209350	172820	5	2	2	7.5	4	4	92.644	0	6.9962	4002400	29350	42	32	17	17	4	3
					B4DJ81;C9JPQ5;P28331;P28331-2;P28331-3;P28331-4;P28331-5	P28331-5	+	+	PTGR1	PTGR1	+	+			common -/+ PPase	A3KN83-3	A3KN83-3;A3KN83-2;A3KN83;A3KN83-4	A3KN83-3;A3KN83-2;A3KN83;A3KN83-4	Protein strawberry notch homolog 1	SBNO1	+	+			34205	44675	40208	32670	34450	39365	40113	38357	6	6	5	7.9	7.9	7	154.06	0	18.494	1039400	15592	62	27	18	18	4	4
					H0Y539;P29353;P29353-2;P29353-3;P29353-5;P29353-6;P29353-7;P98077;Q5T187;Q5T188;X6R6D0	P29353-7	+	+	PTGFRN	PTGFRN	+	+			common -/+ PPase	A5YKK6	A5YKK6;A5YKK6-2;A5YKK6-3;A5YKK6-4;H3BR89;H3BPF1;H3BT18;H3BU44;H3BNB1;H3BMH0;H3BMZ2	A5YKK6;A5YKK6-2;A5YKK6-3;A5YKK6-4	CCR4-NOT transcription complex subunit 1	CNOT1	+	+			34308	31914	34483	32152	42338	37694	40769	40448	11	11	11	6.5	6.5	6.5	266.94	0	51.115	1656000	8744.8	122	46	27	27	6	5
					P29317;P29317-2	P29317	+	+	AARSD1;PTGES3L-AARSD1	PTGES3L-AARSD1	+	+			common -/+ PPase	A6NDG6	A6NDG6;H3BV17	A6NDG6	Phosphoglycolate phosphatase	PGP	+	+			39881	46961	51973	34796	49373	57319	59140	60815	3	3	3	16.2	16.2	16.2	34.006	0	5.1476	1058400	33281	18	14	8	8	2	3
					P29350;P29350-2;P29350-3;P29350-4	P29350	+	+	PTGES2	PTGES2	+	+			common -/+ PPase	A6NE76	A6NE76;K4DI93;Q13620-3;Q13620-1;Q13620	A6NE76;K4DI93;Q13620-3;Q13620-1;Q13620	Cullin-4B	CUL4B	+	+			40825	39486	44817	47309	36320	33542	35873	32204	3	1	1	17.1	8.1	8.1	27.889	0.00052507	2.8179	759870	13845	19	23	12	12	3	3
					P30049	P30049	+	+	QTRT1	QTRT1	+	+			common -/+ PPase	A6NEM2	A6NEM2;P51610-2;P51610;P51610-4;P51610-3;H7C1C4	A6NEM2;P51610-2;P51610;P51610-4	Host cell factor 1;HCF N-terminal chain 1;HCF N-terminal chain 2;HCF N-terminal chain 3;HCF N-terminal chain 4;HCF N-terminal chain 5;HCF N-terminal chain 6;HCF C-terminal chain 1;HCF C-terminal chain 2;HCF C-terminal chain 3;HCF C-terminal chain 4;HCF C-terminal chain 5;HCF C-terminal chain 6	HCFC1	+	+			2503.7	28371	55917	83584	74465	45346	69609	57124	11	11	11	9.1	9.1	9.1	213.47	0	33.331	3000400	29778	77	41	36	36	1	3
					A0A087X1I3;A0A494C1T6;D6RFM5;H0Y8X1;P31040;P31040-2;P31040-3	P31040-2	+	+	RABL6	RABL6	+	+			common -/+ PPase	A6NEM5	A6NEM5;Q92643;B1AK81;Q92643-2;S4R3M5	A6NEM5;Q92643;B1AK81;Q92643-2	GPI-anchor transamidase	PIGK	+	+			58048	48338	73061	93863	58278	55362	58320	51886	4	4	4	22	22	22	37.785	0	11.541	1016900	46061	17	17	14	14	3	3
					A0A1W2PPT5;C9J2Y9;C9J4M6;C9JMN3;C9JZW8;P30876	P30876	+	+	RABGAP1	RABGAP1	+	+			common -/+ PPase	A6NFX8	A6NFX8;Q9UKK9;A6NCQ0;A6NJU6;C9JYY9;H0YEY4	A6NFX8;Q9UKK9	ADP-sugar pyrophosphatase	NUDT5	+	+			195770	192050	175110	183190	155410	165620	156530	158310	7	7	7	37.1	37.1	37.1	25.895	0	53.5	8243800	340420	12	63	28	28	5	7
					A0A0U1RQK9;P30837	P30837	+	+	RABEP1	RABEP1	+	+			common -/+ PPase	C9JC51	C9JC51;A6NGQ4;Q96DT6	C9JC51;A6NGQ4;Q96DT6	Cysteine protease ATG4C	ATG4C	+	+			4009.2	4115.8	4070.3	3015.8	3399.2	4240.8	3963.2	3083.3	1	1	1	11.3	11.3	11.3	17.386	0.00026795	3.0185	43165	6166.4	7	5	4	4	1	1
					P30825;Q5JR49	P30825	+	+	RAB8B	RAB8B	+	+			common -/+ PPase	A6NHL2-2	A6NHL2-2;A6NHL2	A6NHL2-2;A6NHL2	Tubulin alpha chain-like 3	TUBAL3	+	+			1161000	866170	756480	684740	890410	777100	814490	1010200	6	1	1	9.4	4.2	4.2	45.517	0.0049716	1.8874	30523000	234890	25	97	22	22	5	5
					A0A0C4DGW9;C9J7N5;O75830;P30740;P30740-2	P30740-2	+	+	RAB8A	RAB8A	+	+			common -/+ PPase	A6NHQ2	A6NHQ2	A6NHQ2	rRNA/tRNA 2-O-methyltransferase fibrillarin-like protein 1	FBLL1	+	+			85008	80610	91579	104800	68079	66340	65611	73756	2	1	1	6.6	3.3	3.3	34.803	0.002003	2.3971	1690800	42039	19	20	8	8	2	2
					A0A0G2JRQ5;P30711;P30711-2	P30711-2	+	+	RAB7A	RAB7A	+	+			common -/+ PPase	A6NHR9-2	A6NHR9-2;A6NHR9;J3KTL8;A6NHR9-3;J3KRK8;J3QSH1;A0A2R8YCU7	A6NHR9-2;A6NHR9;J3KTL8	Structural maintenance of chromosomes flexible hinge domain-containing protein 1	SMCHD1	+	+			54369	52564	45113	51931	43049	46375	56006	53632	20	20	20	16.1	16.1	16.1	215.74	0	59.482	4280500	23487	105	87	65	65	15	12
					A0A3B3IS27;A0A3B3ITA2;F5H0N7;F5H1T5;F5H6A0;J3KP58;P30622;P30622-1;P30622-2;Q9UDT6;Q9UDT6-2	P30622-2	+	+	RAB6A;RAB6B	RAB6B	+	+			common -/+ PPase	K7EJU3	K7EJU3;K7EN86;C9JSK0;Q13432-2;Q13432;A6NIH7	K7EJU3;K7EN86;C9JSK0;Q13432-2;Q13432;A6NIH7	Protein unc-119 homolog A;Protein unc-119 homolog B	UNC119;UNC119B	+	+			1618.8	24200	22509	39151	35331	45687	38043	38389	1	1	1	7.2	7.2	7.2	14.231	0.0074523	1.7409	370980	52997	7	5	4	4	1	1
					A0A096LNT0;A0A096LNY4;A0A096LNY5;A0A096LNY6;A0A096LP72;A0A096LP76;A0A096LP92;A0A096LPA2;A0A0A6YY92;A0A1B0GTG9;A0A1B0GTJ7;A0A1B0GWF8;A0A1B0GWJ0;B4DEP1;P30566;P30566-2;V9GY96	P30566-2	+	+	RAB5C	RAB5C	+	+			common -/+ PPase	A6NJ78	A6NJ78;A0A0U1RR76;P0C7V9;A6NJ78-2;A6NJ78-4	A6NJ78;A0A0U1RR76;P0C7V9;A6NJ78-2;A6NJ78-4	Probable methyltransferase-like protein 15;Putative methyltransferase-like protein 15P1	METTL15;METTL15P1	+	+			8839.2	10623	10533	12488	14583	15383	15532	12039	2	2	2	8.8	8.8	8.8	46.121	0.00028563	3.5956	185020	6806.8	22	4	6	6	1	1
					A0A087WZQ5;E9PHX8;H7C3L9;M0R0W6;P30530;P30530-2;Q12866	P30530-2	+	+	RAB5B	RAB5B	+	+			common -/+ PPase	H7C2P7	H7C2P7;A6NJD9;A8MVT4;A8MYK1;Q16540	H7C2P7;A6NJD9;A8MVT4;A8MYK1;Q16540	39S ribosomal protein L23, mitochondrial	MRPL23	+	+			21600	18715	23012	20534	23396	19284	23960	22111	3	3	3	34.7	34.7	34.7	13.669	0	16.501	498350	29550	8	15	12	12	1	2
					G5E9U5;P31150	P31150	+	+	RAB5A	RAB5A	+	+			common -/+ PPase	A6NMA8	A6NMA8;O95825;A6NND8;A6NHJ8;H7C3S0;H7C338;H7C0X3;C9K0F7;C9JAL0;F8WF64;C9JZK8;H7C3I5;O95825-2	A6NMA8;O95825;A6NND8;A6NHJ8	Quinone oxidoreductase-like protein 1	CRYZL1	+	+			32274	40322	36582	44998	26347	32763	30685	33256	3	3	3	18.9	18.9	18.9	37.061	0	10.855	899240	28386	18	18	12	12	3	3
					P31689;P31689-2	P31689-2	+	+	RAB4B	RAB4B	+	+			common -/+ PPase	A6NML8	A6NML8;K4DI95;C9J6U3;O60879-2;O60879-3;O60879	A6NML8;K4DI95;C9J6U3;O60879-2;O60879-3;O60879	Protein diaphanous homolog 2	DIAPH2	+	+			14947	12551	20040	24049	26221	27782	26614	25956	3	3	3	3.5	3.5	3.5	124.85	0	7.1381	354480	4420.6	54	11	8	8	1	1
					C9JTN7;E5RG67;E5RGV5;F8W8I6;F8WE16;H7BY49;P31483;P31483-2;P31483-3	P31483-3	+	+	RAB4A	RAB4A	+	+			common -/+ PPase	A6NNK5	A6NNK5;Q12888;Q12888-3;Q12888-2;C9JXV0;M0R142;H7C495;H7BZY0	A6NNK5;Q12888;Q12888-3;Q12888-2	Tumor suppressor p53-binding protein 1	TP53BP1	+	+			224060	215390	206200	207380	173810	198820	162590	183670	13	13	13	14.6	14.6	14.6	209.02	0	35.55	3095600	28238	88	44	22	22	8	11
					A0A286YFD6;C9JXC1;P31350;P31350-2	P31350-2	+	+	RAC1	RAC1	+	+			common -/+ PPase	A6NNZ2	A6NNZ2	A6NNZ2	Tubulin beta-8 chain-like protein LOC260334		+	+			7029700	7230300	6976000	8161700	4916200	5379800	6074700	6626200	6	1	1	16.7	8.8	8.8	49.572	1	-2	146030000	4046800	18	123	22	22	6	6
					P31151;Q86SG5	P31151	+	+	RACGAP1	RACGAP1	+	+			common -/+ PPase	C9JH92	C9JH92;A6NP24;Q08257-3;Q08257;Q08257-2	C9JH92;A6NP24;Q08257-3;Q08257	Quinone oxidoreductase	CRYZ	+	+			136800	163160	137900	132560	135700	129010	146780	151480	8	8	8	65	65	65	21.932	0	26.264	4219900	178170	11	34	28	28	6	5
					P31153;P31153-2;Q00266	P31153	+	+	RANBP1	RANBP1	+	+			common -/+ PPase	B7ZBQ1	B7ZBQ1;A6PVP4;B7ZBQ3;Q9H944-2;Q9H944	B7ZBQ1;A6PVP4;B7ZBQ3;Q9H944-2;Q9H944	Mediator of RNA polymerase II transcription subunit 20	MED20	+	+			24883	23241	25532	27353	18433	18533	19147	19588	1	1	1	18.3	18.3	18.3	6.7086	0.0020085	2.4219	247050	247050	1	8	4	4	1	1
					P31260;P31260-2	P31260	+	+	RAN	RAN	+	+			common -/+ PPase	A6PW57	A6PW57;Q99755-2;Q99755-4;Q99755-3;Q99755	A6PW57;Q99755-2;Q99755-4;Q99755-3;Q99755	Phosphatidylinositol 4-phosphate 5-kinase type-1 alpha	PIP5K1A	+	+			21647	16637	18367	19570	14513	15678	12842	13716	2	1	1	6.4	3.6	3.6	61.257	0.0017663	2.4588	267220	6160.6	23	11	7	7	1	2
					C9JSK5;H7BYW5;K7EKR1;P31321	P31321	+	+	RALY	RALY	+	+			common -/+ PPase	A6XGL2	A6XGL2;P01308	A6XGL2;P01308	Insulin;Insulin B chain;Insulin A chain	INS	+	+			807220	501320	110740	145430	27803	19643	27783	20851	1	1	1	21.4	21.4	21.4	10.959	0	106.54	3369300	608220	3	18	4	4	1	1
					P31323	P31323	+	+	RALGAPB	RALGAPB	+	+			common -/+ PPase	A8K7Q2	A8K7Q2;E9PS65;E9PM13	A8K7Q2		HSPA8	+	+			1289500	1285800	1319400	1369400	1091100	1172300	1076600	1135500	21	1	1	49	2.4	2.4	45.338	0.00026759	2.9999	95917000	1820200	19	298	79	79	17	19
					P30520	P30520	+	+	RALB	RALB	+	+			common -/+ PPase	P55145	P55145;A8K878;H7C2D6	P55145;A8K878	Mesencephalic astrocyte-derived neurotrophic factor	MANF	+	+			16991	26759	33888	42964	130080	138080	121420	124920	4	4	4	35.7	35.7	35.7	20.7	0	36.368	2264200	3178.9	10	20	11	11	1	2
					F6QPS0;G5EA36;I3L2Z8;I3L394;I3L3H6;P30260;P30260-2	P30260	+	+	RAI14	RAI14	+	+			common -/+ PPase	Q06787	Q06787;Q06787-9;R9WNI0;A8MQB8;G3V0J0;Q06787-4;Q06787-3;Q06787-7;Q06787-5;Q06787-6;Q06787-2;Q06787-8;A0A087WXI3;Q06787-10;Q06787-11;Q8IXW7;A0A087WWR6	Q06787;Q06787-9;R9WNI0;A8MQB8;G3V0J0;Q06787-4;Q06787-3;Q06787-7;Q06787-5;Q06787-6;Q06787-2;Q06787-8;A0A087WXI3;Q06787-10;Q06787-11	Fragile X mental retardation protein 1	FMR1	+	+			56573	49821	42902	49670	34063	26768	37256	35304	3	2	2	5.5	4.3	4.3	71.174	0	6.4241	682600	15774	33	18	12	12	3	3
					H0YDG7;P30154;P30154-2;P30154-3;P30154-4;P30154-5	P30154-5	+	+	BRAF;RAF1	RAF1	+	+			common -/+ PPase	H7BY10	H7BY10;K7ERT8;A8MUS3;P62750;K7EJV9;K7EMA7	H7BY10;K7ERT8;A8MUS3;P62750;K7EJV9;K7EMA7	60S ribosomal protein L23a	RPL23A	+	+			583430	571440	636300	674910	605720	655470	664740	741180	6	6	6	38	38	38	17.692	0	25.143	14929000	1703500	6	47	20	20	5	5
					B3KQV6;C9J9C1;E9PH38;E9PHZ6;E9PNM7;E9PPI5;M0QXG4;M0R0K6;P30153	P30153	+	+	RAE1	RAE1	+	+			common -/+ PPase	E7EVE9	E7EVE9;A8MX75;P18074;B4E0F6;K7EIT8;P18074-2	E7EVE9;A8MX75;P18074	TFIIH basal transcription factor complex helicase XPD subunit	ERCC2	+	+			301380	173910	106000	152030	179520	56236	36390	61711	3	3	3	5.7	5.7	5.7	77.921	0.0026641	2.0714	1322100	39666	33	4	8	8	2	2
					P30101	P30101	+	+	RAD51	RAD51	+	+			common -/+ PPase	A8MXV4	A8MXV4	A8MXV4	Nucleoside diphosphate-linked moiety X motif 19, mitochondrial	NUDT19	+	+			31054	32516	39947	43086	29149	29886	27336	32345	5	5	5	15.7	15.7	15.7	42.233	0	9.7882	784680	28021	17	18	16	16	3	2
					P30086	P30086	+	+	RAD50	RAD50	+	+			common -/+ PPase	J3QKW7	J3QKW7;A8MZF9;P55039;J3QR71;J3QRI9	J3QKW7;A8MZF9;P55039;J3QR71;J3QRI9	Developmentally-regulated GTP-binding protein 2	DRG2	+	+			12763	13976	14252	19238	21813	19845	22404	31170	2	2	2	15.6	15.6	15.6	26.624	0	6.6614	294630	8219.5	11	7	6	6	1	1
					A0A494BXC7;P30085;P30085-2;P30085-3;Q5T0D2	P30085-3	+	+	RAD23B	RAD23B	+	+			common -/+ PPase	A9Z1X7	A9Z1X7;Q8IYB3-2;Q8IYB3;E9PCT1;M0R1E7;M0R088	A9Z1X7;Q8IYB3-2;Q8IYB3;E9PCT1	Serine/arginine repetitive matrix protein 1	SRRM1	+	+			101960	94990	43639	29148	76944	81761	54436	53551	4	4	3	7.9	7.9	6.6	103.39	0	6.588	1535300	14627	42	22	11	11	4	4
					P30084	P30084	+	+	RAD21	RAD21	+	+			common -/+ PPase	H0Y645	H0Y645;B0QY35;B0QY34;H7BYT1;P48730-2;P48730;P49674;H0Y2N6;J3QQI9;B0QY36;H0Y682	H0Y645;B0QY35;B0QY34;H7BYT1;P48730-2;P48730;P49674;H0Y2N6;J3QQI9;B0QY36	Casein kinase I isoform delta;Casein kinase I isoform epsilon	CSNK1E;CSNK1D	+	+			4472.7	5082.1	11270	6254.9	14193	12870	8412.5	6089.9	3	3	3	15.2	15.2	15.2	31.182	0.0002739	3.2649	203010	8802.6	16	6	11	11	1	1
					P30050;P30050-2	P30050-2	+	+	RAB3IP	RAB3IP	+	+			common -/+ PPase	B0QY89	B0QY89;Q9Y262-2;Q9Y262;B0QY90;C9JHP4;C9K0Q7;H7C3A0;H0Y7E6	B0QY89;Q9Y262-2;Q9Y262;B0QY90	Eukaryotic translation initiation factor 3 subunit L	EIF3L	+	+			208740	222410	216660	232190	183130	192060	202270	203260	25	25	25	45.5	45.5	45.5	70.901	0	323.31	18640000	323990	30	174	92	92	25	21
					H0Y548;P30405;P30405-2;R4GN99	P30405	+	+	RAB3IL1	RAB3IL1	+	+			common -/+ PPase	B0QYD3	B0QYD3;Q9UH17-3;Q9UH17;Q9UH17-2;P31941-2;P31941	B0QYD3;Q9UH17-3;Q9UH17;Q9UH17-2	DNA dC->dU-editing enzyme APOBEC-3B	APOBEC3B	+	+			25109	4087.2	10632	12597	6078.3	16376	10330	13381	3	3	1	9.4	9.4	3.3	57.208	0.00027174	3.1867	210360	3252.6	24	7	11	11	2	2
					A0A087WT44;A0A1B0GXH0;I3L159;I3L1F5;I3L1Y2;I3L276;I3L463;I3L4P8;P30519;P30519-2	P30519-2	+	+	RAB22A	RAB22A	+	+			common -/+ PPase	B0QYK0	B0QYK0;Q01844-6;Q01844-3;Q01844;Q01844-5;H7BY36;A0A0D9SFL3;C9JGE3;Q01844-4;Q01844-2	B0QYK0;Q01844-6;Q01844-3;Q01844;Q01844-5;H7BY36;A0A0D9SFL3;C9JGE3;Q01844-4;Q01844-2	RNA-binding protein EWS	EWSR1	+	+			52634	46650	47074	60792	44070	42344	38848	47677	2	2	2	6.3	6.3	6.3	64.929	0	21.378	908780	6475	17	9	4	4	1	1
					A0A0G2JPD3;A0A140T8W8;A0A140T8Y4;A0A140T941;A0A140T975;A0A140T9Z6;A0A140TA02;A0A1W2PNR7;A0A1W2PPF8;A0A1W2PQS8;A0A1W2PR61;A0A1W2PS39;B0UXQ0;P01891;P10314;P10316;P16189;P16190;P18462;P30450;P30453;P30456;P30457;P30459;P30512;Q9GJ45	P30512	+	+	RAB21	RAB21	+	+			common -/+ PPase	H3BPC4	H3BPC4;H3BQQ9;B0QYN7;P63279	H3BPC4;H3BQQ9;B0QYN7;P63279	SUMO-conjugating enzyme UBC9	UBE2I	+	+			58984	57816	37061	65784	77031	100560	80171	110390	2	2	2	32.9	32.9	32.9	7.8891	0.00030414	4.3635	970350	201770	4	7	7	7	1	1
					A0A140T921;A0A140T942;A0A140T962;A0A140T9B3;A0A140T9E1;A0A140T9H5;A0A140T9J9;A0A140T9L3;A0A140T9U8;A0A140T9Z7;A0A140TA05;A0A140TA12;A0A1W2PR11;A2AEA2;F8W9Z8;O19617;P01893;P10321;P13747;P30499;Q29865;Q29963	P30499	+	+	RAB1B	RAB1B	+	+			common -/+ PPase	Q99829	Q99829;B0QZ18;F2Z2V0;A6PVH9;E7ENH5;Q5JX58;Q5JX59;Q5JX60;Q5JX44;H0Y524;Q5JX45;Q5JX56;Q5JX61;Q5JX52;Q5JX55;Q5JX57;E7EV27;Q5JX54	Q99829;B0QZ18;F2Z2V0;A6PVH9;E7ENH5;Q5JX58;Q5JX59;Q5JX60;Q5JX44	Copine-1	CPNE1	+	+			377310	363500	348270	377230	299860	322300	317830	313680	14	14	14	33.7	33.7	33.7	59.058	0	98.416	17899000	385450	18	120	48	48	13	11
					P30483;P30487;P30488	P30488	+	+	RAB1A	RAB1A	+	+			common -/+ PPase	B0QZK4	B0QZK4;Q5SSJ5-2;Q5SSJ5;Q5SWC8;X6RGJ2;Q5SSJ5-3	B0QZK4;Q5SSJ5-2;Q5SSJ5;Q5SWC8;X6RGJ2;Q5SSJ5-3	Heterochromatin protein 1-binding protein 3	HP1BP3	+	+			43060	48155	41626	38211	38939	38909	40062	44664	4	4	4	29.2	29.2	29.2	28.515	0	36.83	1081500	13372	14	24	15	15	3	3
					B7Z8J4;K7EN82;P30419;P30419-2	P30419	+	+	RAB18	RAB18	+	+			common -/+ PPase	B0YIW6	B0YIW6;P48444;P48444-2;Q6P1Q5;E9PK34	B0YIW6;P48444;P48444-2	Coatomer subunit delta	ARCN1	+	+			301930	298950	319150	290550	320850	304170	316200	304060	16	16	16	36.1	36.1	36.1	61.626	0	72.814	13860000	171150	29	115	51	51	12	13
					P62805	P62805	+	+	RAB14	RAB14	+	+			common -/+ PPase	B1AH49	B1AH49;P25325;P25325-2	B1AH49;P25325;P25325-2	Sulfurtransferase;3-mercaptopyruvate sulfurtransferase	MPST	+	+			28086	27510	24287	24651	19708	22626	23780	20653	4	4	4	27.2	27.2	27.2	24.982	0	8.2398	492320	20879	13	12	10	10	1	3
					E7EM56;E9PDK4;F5GYK7;P43304;P43304-2	P43304-2	+	+	RAB13	RAB13	+	+			common -/+ PPase	B1AK87	B1AK87;B1AK88;P47756-2;P47756;B1AK85	B1AK87;B1AK88;P47756-2;P47756;B1AK85	F-actin-capping protein subunit beta	CAPZB	+	+			165750	178470	187600	185910	211200	205470	191430	165800	7	7	7	38.1	38.1	38.1	29.295	0	34.341	6332800	325630	15	46	23	23	5	5
					A0A2R8Y6P0;A0A2R8Y713;A0A2R8Y7S8;A0A2R8YFH0;A0A2R8YG02;C9J809;E9PHA6;P43246;P43246-2	P43246-2	+	+	RAB11FIP1	RAB11FIP1	+	+			common -/+ PPase	B1AKJ5	B1AKJ5;O43847;O43847-2;G3V1R5;F5H7V1;H0Y5G9	B1AKJ5;O43847;O43847-2;G3V1R5;F5H7V1	Nardilysin	NRD1	+	+			42648	41521	35966	29375	38550	38472	33467	36043	9	9	9	9.4	9.4	9.4	139.41	0	25.646	2122900	17890	53	54	31	31	8	8
					A0A0R4J2E8;A0A1B0GX04;A8MXP9;B3KM87;D6R8Z5;D6R991;D6R9F3;D6RAM9;D6RAY2;D6RB45;D6RBI2;D6RBK5;D6RBS2;D6RCM3;D6RE02;D6REK4;D6REM6;D6RIA2;H0Y8T4;P43243;P43243-2;Q68E03	P43243-2	+	+	RAB11B	RAB11B	+	+			common -/+ PPase	P50993	P50993;B1AKY9;H0Y7C1	P50993;B1AKY9;H0Y7C1	Sodium/potassium-transporting ATPase subunit alpha-2	ATP1A2	+	+			156060	120590	117630	131070	140240	153740	140690	130560	10	1	1	10.9	1.3	1.3	112.26	1	-2	6212400	79133	48	75	30	30	6	9
					A6PVN3;B7ZBP5;H0Y4Z7;P43155;P43155-2;P43155-3	P43155-3	+	+	RAB11A	RAB11A	+	+			common -/+ PPase	B1ALA9	B1ALA9;P60891;P60891-2;A0A2R8Y7H4;B7ZB02;P21108;A0A0B4J207;Q15244;B1ALA7	B1ALA9;P60891;P60891-2;A0A2R8Y7H4	Ribose-phosphate pyrophosphokinase 1	PRPS1	+	+			195890	204240	221030	198410	174780	179810	192640	168150	10	10	6	37.5	37.5	20.4	31.392	0	135.03	9612600	102570	17	107	37	37	6	7
					A0A3B3IRT8;C9IZQ1;C9J3L8;C9J5W0;C9JBX5;E9PAL7;P43307;P43307-2	P43307	+	+	RAB10	RAB10	+	+			common -/+ PPase	B1ALP5	B1ALP5;B1ALP6;Q5T7N3-2;Q5T7N3	B1ALP5;B1ALP6;Q5T7N3-2;Q5T7N3	KN motif and ankyrin repeat domain-containing protein 4	KANK4	+	+			161410	137190	121440	153630	55850	54687	69577	67198	1	1	1	17.3	17.3	17.3	14.117	0.0019773	2.2858	1955600	45188	6	14	4	4	1	1
					I3L3N5;I3L495;P43034;P43034-2	P43034-2	+	+	QTRTD1	QTRTD1	+	+			common -/+ PPase	B1AMB1	B1AMB1;B1AMB2;Q9BPZ7-5;Q9BPZ7-6;Q9BPZ7-3;Q9BPZ7-2;Q9BPZ7	B1AMB1;B1AMB2;Q9BPZ7-5;Q9BPZ7-6;Q9BPZ7-3;Q9BPZ7-2;Q9BPZ7	Target of rapamycin complex 2 subunit MAPKAP1	MAPKAP1	+	+			20031	22667	21660	26656	14669	17605	20063	21091	1	1	1	15.1	15.1	15.1	10.36	0	9.4425	230730	115370	2	8	4	4	1	1
					A0A3B3ISF9;B4DKB2;E9PHZ1;E9PJG1;E9PN99;P42892;P42892-2;P42892-3;P42892-4	P42892-4	+	+	RAB23	RAB23	+	+			common -/+ PPase	B1AMN7	B1AMN7;Q9P2B4	B1AMN7;Q9P2B4	CTTNBP2 N-terminal-like protein	CTTNBP2NL	+	+			17480	14038	11290	4049.6	22117	26862	26351	18843	2	2	2	12.9	12.9	12.9	31.777	0	7.8783	232420	13672	17	8	5	5	1	1
					F5H571;P45974;P45974-2	P45974	+	+	RAB29;RAB32;RAB38	RAB29	+	+			common -/+ PPase	B1AMS2	B1AMS2;Q14141-2;Q14141-4;Q14141;Q14141-3	B1AMS2;Q14141-2;Q14141-4;Q14141;Q14141-3	Septin-6	2006-09-01	+	+			47412	31765	40169	30924	41169	31954	37304	33358	6	4	4	20.6	18.8	18.8	49.303	0	10.043	997860	12309	20	17	17	17	3	1
					P45954;P45954-2	P45954-2	+	+	RAB3GAP2	RAB3GAP2	+	+			common -/+ PPase	B1ANR0	B1ANR0;Q13310-2;Q13310;Q13310-3;B1ANR1;H0Y5F5;H0Y6X6;H0YEU6;H0YER0;H0YCC8	B1ANR0;Q13310-2;Q13310;Q13310-3;B1ANR1;H0Y5F5	Polyadenylate-binding protein;Polyadenylate-binding protein 4	PABPC4	+	+			413270	401230	509170	522070	400410	423490	434010	453320	14	8	7	31.1	20.7	15.8	67.97	0	14.363	14752000	344100	32	96	49	49	10	12
					A0A0A0MR02;A2A3S1;P45880;P45880-1;P45880-2;Q5JSD1;Q5JSD2	P45880-2	+	+	RAB3GAP1	RAB3GAP1	+	+			common -/+ PPase	B1APM4	B1APM4;P35610;P35610-3;P35610-2	B1APM4;P35610;P35610-3;P35610-2	Sterol O-acyltransferase 1	SOAT1	+	+			17473	21262	14678	21765	32426	32929	41043	39876	2	2	2	11.5	11.5	11.5	29.892	0	7.494	479320	7028.4	11	11	6	6	1	1
					P45877	P45877	+	+	RAB3D	RAB3D	+	+			common -/+ PPase	G3V4W0	G3V4W0;G3V4C1;P07910-2;B2R5W2;P07910-4;B4DY08;G3V251;G3V5X6;G3V3K6;B4DSU6;A0A0G2JNQ3;B2RXH8;O60812;G3V2D6;B7ZW38;P0DMR1;A0A0G2JPF8;G3V4M8;P07910-3;G3V2H6;G3V5V7	G3V4W0;G3V4C1;P07910-2;B2R5W2;P07910-4;B4DY08;G3V251;G3V5X6;G3V3K6;B4DSU6;A0A0G2JNQ3;B2RXH8;O60812	Heterogeneous nuclear ribonucleoproteins C1/C2;Heterogeneous nuclear ribonucleoprotein C-like 2;Heterogeneous nuclear ribonucleoprotein C-like 1	HNRNPC;HNRNPCL2;HNRNPCL1	+	+			2528600	2576100	2980000	2827600	1876900	2009300	1994300	1902900	20	20	4	46.9	46.9	11.8	28.916	0	323.31	86130000	4125900	15	163	69	69	19	19
					C9JT21;P43897;P43897-2	P43897-2	+	+	RAB3B	RAB3B	+	+			common -/+ PPase	B2WTI3	B2WTI3;B2WTI4;K7EJU9;Q6NYC1-2;Q6NYC1;Q6NYC1-3	B2WTI3;B2WTI4;K7EJU9;Q6NYC1-2;Q6NYC1;Q6NYC1-3	Bifunctional arginine demethylase and lysyl-hydroxylase JMJD6	JMJD6	+	+			35642	29812	34045	33137	17494	15725	18861	19816	3	3	3	11.3	11.3	11.3	39.241	0	13.068	567900	16386	15	8	12	12	2	3
					C9JDM3;C9JGV6;C9JIC6;C9JJ34;C9JXG8;F6WQW2;P43487;P43487-2	P43487	+	+	RAB39A	RAB39A	+	+			common -/+ PPase	H0YCG5	H0YCG5;E9PM17;B3KNX7;Q13153;Q13153-2	H0YCG5;E9PM17;B3KNX7;Q13153;Q13153-2	Non-specific serine/threonine protein kinase;Serine/threonine-protein kinase PAK 1	PAK1	+	+			147090	163230	181290	200090	259560	160740	183580	201240	5	1	1	19.7	4.5	4.5	27.093	0.0049681	1.8819	3673400	304780	10	32	18	18	4	3
					A0A0C4DFS8;C9JF35;C9JG65;P43490	P43490	+	+	RAB35	RAB35	+	+			common -/+ PPase	B3KS98	B3KS98;O15372;A0A087WZK9;E5RJT0;E5RGU4;E5RFW7;E5RFH0	B3KS98;O15372;A0A087WZK9;E5RJT0	Eukaryotic translation initiation factor 3 subunit H	EIF3H	+	+			302830	293200	270990	304200	292690	280100	284850	279120	12	12	12	47.8	47.8	47.8	41.581	0	323.31	17573000	220850	20	110	45	45	10	11
					P42858	P42858	+	+	RAB31	RAB31	+	+			common -/+ PPase	B3KSI3	B3KSI3;M0QXF9;O15382;M0QZ10;O15382-2;M0QZP4;M0R2K7	B3KSI3;M0QXF9;O15382;M0QZ10;O15382-2;M0QZP4	Branched-chain-amino-acid aminotransferase;Branched-chain-amino-acid aminotransferase, mitochondrial	BCAT2	+	+			35588	38022	36152	41752	37384	39483	44848	37525	7	7	7	32.1	32.1	32.1	39.915	0	17.854	1501800	30353	15	32	23	23	4	5
					P43686;P43686-2	P43686	+	+	RAB2B	RAB2B	+	+			common -/+ PPase	B3KSW4	B3KSW4;O76081-4;O76081-3;O76081-5;O76081-6;O76081-2;O76081	B3KSW4;O76081-4;O76081-3;O76081-5;O76081-6;O76081-2;O76081	Regulator of G-protein signaling 20	RGS20	+	+			4259.2	7672.1	13655	12319	8449	9368.2	10007	8677.5	1	1	1	13.9	13.9	13.9	14.442	0.00028114	3.4755	109660	15666	7	5	4	4	1	1
					E9PIG4;E9PKN6;E9PL49;E9PL85;E9PLY4;E9PNF7;E9PNJ1;E9PQB5;E9PQN3;P42785;P42785-2	P42785-2	+	+	RAB2A	RAB2A	+	+			common -/+ PPase	H0Y9E6	H0Y9E6;B3KVZ3;Q9H3R5	H0Y9E6;B3KVZ3;Q9H3R5	Centromere protein H	CENPH	+	+			7938.6	7915.4	12834	14114	29959	33965	36350	34976	2	2	2	18.7	18.7	18.7	22.001	0	17.089	380810	8065.6	12	6	6	6	1	1
					B1AUU8;P42566;P42566-2	P42566	+	+	PGRMC1	PGRMC1	+	+			common -/+ PPase	B4DF77	B4DF77;Q6VY07;Q6VY07-2;E9PNZ9;E9PSG7;H0YCU5	B4DF77;Q6VY07;Q6VY07-2;E9PNZ9	Phosphofurin acidic cluster sorting protein 1	PACS1	+	+			22465	29792	26036	26217	23787	22117	27158	20523	4	4	4	13	13	13	54.46	0	6.0092	556870	13773	23	15	13	13	2	4
					C9JLI1;P42356;P42356-2	P42356-2	+	+	PGP	PGP	+	+			common -/+ PPase	B4DI26	B4DI26;Q9Y6N1-2;Q9Y6N1;I3L4E7	B4DI26;Q9Y6N1-2;Q9Y6N1;I3L4E7	Cytochrome c oxidase assembly protein COX11, mitochondrial	COX11	+	+			18645	21962	15721	31633	22180	32984	17242	35672	2	2	2	23	23	23	25.977	0	4.619	275670	4856.9	12	6	6	6	1	1
					B1AKP8;B1AKQ2;P42345	P42345	+	+	NCK1	NCK1	+	+			common -/+ PPase	B4DIH5	B4DIH5;P61201;P61201-2;H0YM03;H0YKU5;H0YMC2	B4DIH5;P61201;P61201-2	COP9 signalosome complex subunit 2	COPS2	+	+			55270	65677	74568	86106	64190	61977	63034	63090	11	11	10	44.1	44.1	38.3	44.228	0	73.491	2671500	59323	19	47	36	36	6	6
					D6REC7;H0Y8U3;H0YAC4;P42285	P42285	+	+	NCEH1	NCEH1	+	+			common -/+ PPase	H3BRY6	H3BRY6;B4DVT3;B4DJL6;Q96SY0-4;Q96SY0-3;Q96SY0	H3BRY6;B4DVT3;B4DJL6;Q96SY0-4;Q96SY0-3;Q96SY0	von Willebrand factor A domain-containing protein 9	VWA9	+	+			13716	26183	14966	21671	19696	17301	21962	14218	4	4	4	10	10	10	51.583	0	6.3352	385030	5550.7	25	15	14	14	2	2
					A0A1W2PNW1;A0A494C0T4;G3V2H4;G3V2L2;G3V2M3;G3V370;G3V568;G3V5I8;G3V5K5;H0YJH6;P42226;P42226-2;P42226-3;Q5FBW6	P42226-3	+	+	NCDN	NCDN	+	+			common -/+ PPase	O75390	O75390;B4DJV2;A0A0C4DGI3;F8VPA1;H0YH82;F8VRP1;F8VX68;F8VRI6;F8VPF9;F8W1S4;F8W4S1;F8VX07;F8VZK9;H0YIC4;F8VR34;F8VTT8;F8W642;F8VWQ5;F8VU34	O75390;B4DJV2;A0A0C4DGI3	Citrate synthase, mitochondrial;Citrate synthase	CS	+	+			381020	376580	291740	365300	376420	401390	385790	411520	15	15	15	46.6	46.6	46.6	51.712	0	222.21	24202000	531840	19	103	51	51	11	12
					D2KFR9;E7ENM1;E7EPD2;E9PH66;H7BZ88;J3KPM9;P42224;P42224-2	P42224-2	+	+	NCBP1	NCBP1	+	+			common -/+ PPase	B4DJV5	B4DJV5;Q13610	B4DJV5;Q13610	Periodic tryptophan protein 1 homolog	PWP1	+	+			23507	25426	28405	31220	19573	20919	16606	20723	2	2	2	7.3	7.3	7.3	49.038	0	5.4092	560650	21902	21	16	8	8	2	1
					P42166;P42167-3	P42167-3	+	+	NCAPH	NCAPH	+	+			common -/+ PPase	B4DL54	B4DL54;P49356-2;P49356	B4DL54;P49356-2;P49356	Protein farnesyltransferase subunit beta	CHURC1-FNTB;FNTB	+	+			19410	34445	36764	29144	20757	14564	22578	18204	1	1	1	1.9	1.9	1.9	52.785	0.002214	2.2252	271110	15062	18	6	4	4	1	1
					G5E972;H0YJH7;P42167;P42167-2	P42167-2	+	+	NCAPG	NCAPG	+	+			common -/+ PPase	B4DLN1	B4DLN1;Q9UBX3;Q9UBX3-2;I3L1E8;F6RGN5	B4DLN1			+	+			49236	44526	73588	66043	268020	239970	231890	215570	12	12	3	31.2	31.2	10.9	48.099	0	222.27	5531200	108880	21	55	35	35	3	4
					C9JLI6;H0YMV8;P42677;Q71UM5	P42677	+	+	NCAPD3	NCAPD3	+	+			common -/+ PPase	C9J486	C9J486;C9JIP2;B4DND0;Q16831;F8WD51	C9J486;C9JIP2;B4DND0;Q16831;F8WD51	Uridine phosphorylase 1	UPP1	+	+			41091	43835	55540	38568	49680	52091	54507	50142	2	2	2	27.8	27.8	27.8	15.621	0	7.8724	1409900	16636	10	27	8	8	2	2
					J3QRG6;K7ENC6;K7ES20;P42771;P42771-2;P42771-3;P42771-4;P42772	P42772	+	+	NCAPD2	NCAPD2	+	+			common -/+ PPase	H0Y630	H0Y630;B4DR80;Q9Y6E0-2;Q9Y6E0;Q5JV98;Q5JV99	H0Y630;B4DR80;Q9Y6E0-2;Q9Y6E0;Q5JV98	Serine/threonine-protein kinase 24;Serine/threonine-protein kinase 24 36 kDa subunit;Serine/threonine-protein kinase 24 12 kDa subunit	STK24	+	+			52253	64862	66549	71156	70523	75289	77245	72401	7	7	2	19.8	19.8	6	40.781	0	18.37	3037100	129400	17	60	28	28	6	6
					F2Z388;P42766	P42766	+	+	HPCA;HPCAL1;NCALD	NCALD	+	+			common -/+ PPase	B4DUC8	B4DUC8;Q13126;Q13126-4;Q13126-3;Q13126-2;J3QSB7;Q13126-7;Q13126-6;Q13126-5;F2Z2F3;F8WES2;J3KRN1	B4DUC8;Q13126;Q13126-4;Q13126-3;Q13126-2;J3QSB7;Q13126-7;Q13126-6;Q13126-5	S-methyl-5-thioadenosine phosphorylase;Purine nucleoside phosphorylase	MTAP	+	+			115950	148520	132520	139270	160180	109890	137370	125560	7	7	7	32.7	32.7	32.7	33.186	0	15.698	5307100	111090	20	43	26	26	5	6
					A0A0B4J2A4;K7EME0;P42765	P42765	+	+	NBN	NBN	+	+			common -/+ PPase	B4DUT8	B4DUT8;Q99439;H3BVI6;B4DDF4;Q99439-2;K7ES69;A0A087X271;A0A087X1X5;H3BQH0;A0A087WV51;U3KPS3	B4DUT8;Q99439;H3BVI6;B4DDF4;Q99439-2;K7ES69;A0A087X271	Calponin;Calponin-2	CNN2	+	+			178780	181870	221830	224710	246150	271810	242960	226840	10	10	9	57	57	47.3	35.943	0	193.82	8056800	279410	15	54	32	32	5	4
					A0A0C4DG06;B8ZZ38;C9JCA9;H7C3W8;P42704	P42704	+	+	NBAS	NBAS	+	+			common -/+ PPase	P0CG48	P0CG48;F5GYU3;Q96C32;Q5PY61;J3QKN0;F5GXK7;F5H747;F5H388;B4DV12;F5H265;F5H2Z3;F5H6Q2;J3QTR3;J3QS39;P62987;P62979;P0CG47;Q49A90;M0R1V7;F5GZ39;M0R2S1;M0R1M6;A0A2R8Y422;J3QSA3	P0CG48;F5GYU3;Q96C32;Q5PY61;J3QKN0;F5GXK7;F5H747;F5H388;B4DV12;F5H265;F5H2Z3;F5H6Q2;J3QTR3;J3QS39;P62987;P62979;P0CG47;Q49A90;M0R1V7;F5GZ39;M0R2S1;M0R1M6;A0A2R8Y422;J3QSA3	Polyubiquitin-C;Ubiquitin;Ubiquitin-60S ribosomal protein L40;Ubiquitin;60S ribosomal protein L40;Ubiquitin-40S ribosomal protein S27a;Ubiquitin;40S ribosomal protein S27a;Polyubiquitin-B;Ubiquitin	UBC;UBB;RPS27A;UBA52	+	+			1258500	1171600	1152400	1184100	829110	943540	1107900	1138400	10	10	10	77.5	77.5	77.5	77.038	0	116.49	25332000	354870	44	90	38	38	9	8
					H3BU69;H3BUM9;K7ENL8;K7EQY5;K7ES68;P41240;P42679;P42679-2;P42679-3	P42679	+	+	NAV1	NAV1	+	+			common -/+ PPase	E9PNU1	E9PNU1;B4DXC8;Q9Y5B8;Q9Y5B8-2	E9PNU1;B4DXC8;Q9Y5B8;Q9Y5B8-2	Nucleoside diphosphate kinase 7	NME7	+	+			12970	10585	12040	8791.4	12551	9366.6	8454.5	11380	2	2	2	11.7	11.7	11.7	28.888	0.00052812	2.8886	179440	11215	16	5	7	7	1	1
					A0A075B6R3;J3QRR8;J3QS41;P42694;P42694-2	P42694	+	+	NCKAP1	NCKAP1	+	+			common -/+ PPase	B4DXZ6	B4DXZ6;P51114;P51114-3;P51114-2;E7EU85;E9PFF5;C9JZE0;C9JY20;C9IZ22;C9JAJ4;H7C4S4	B4DXZ6;P51114;P51114-3;P51114-2;E7EU85;E9PFF5	Fragile X mental retardation syndrome-related protein 1	FXR1	+	+			97102	97370	101460	91558	87967	93956	99830	105180	12	12	9	22.5	22.5	18.6	68.326	0	55.751	5665900	50429	27	87	41	41	10	9
					E9PKK4;G3V1A9;P42695	P42695	+	+	NCKIPSD	NCKIPSD	+	+			common -/+ PPase	B4DY09	B4DY09;Q12905;X6R6Z1;A0A0A0MRL0	B4DY09;Q12905;X6R6Z1	Interleukin enhancer-binding factor 2	ILF2	+	+			331970	346440	326050	363480	296350	279540	304270	326440	20	20	20	61.1	61.1	61.1	38.91	0	213.09	29229000	800460	17	204	73	73	18	18
					P45985;P45985-2	P45985	+	+	NDUFA10	NDUFA10	+	+			common -/+ PPase	B4DY31	B4DY31;Q96DN2	B4DY31;Q96DN2	von Willebrand factor C and EGF domain-containing protein	VWCE	+	+			23774	21096	17493	18189	21282	21330	24976	27368	1	1	1	5.7	5.7	5.7	43.748	0.0096066	1.6106	259240	17283	15	3	4	4	1	1
					A0A075B6G3;E7EQR9;E7EQS5;E7ESB2;E9PDN5;F5GZY3;F8VX32;H0Y304;H0Y337;P11532;P11532-10;P11532-2;P11532-3;P11532-4;P11532-5;P11532-6;P11532-7;P11532-8;P11532-9;P46939;P46939-2;P46939-3;P46939-4;Q5T097	P46939	+	+	NDRG3	NDRG3	+	+			common -/+ PPase	B4DZG7	B4DZG7;P40616-2;P40616;F8VYN9;F8W1Z8	B4DZG7;P40616-2;P40616;F8VYN9	ADP-ribosylation factor-like protein 1	ARL1	+	+			15230	27957	13924	18825	71676	68699	60789	67663	5	5	5	54.1	54.1	54.1	15.443	0	113.8	1961500	64285	7	37	16	16	4	4
					H0YCI3;P46937;P46937-2;P46937-3;P46937-4;P46937-5;P46937-6;P46937-7;P46937-8;P46937-9	P46937-9	+	+	NDRG1	NDRG1	+	+			common -/+ PPase	B4E0K5	B4E0K5;Q16539-2;Q16539;E7EX54;B5TY33;Q16539-5;Q16539-4	B4E0K5;Q16539-2;Q16539	Mitogen-activated protein kinase 14	MAPK14	+	+			26841	20770	21380	14521	36083	34455	36878	34800	5	5	2	36.7	36.7	19.1	32.357	0	20.393	1368500	32761	15	32	15	15	3	3
					A0A3B3IUC1;H0Y8H4;H0Y8X6;P46934;P46934-2;P46934-3;P46934-4	P46934-4	+	+	NDE1;NDEL1	NDEL1	+	+			common -/+ PPase	B4E0T2	B4E0T2;P50542-2;P50542;P50542-4;F5H5C0;P50542-3;H0YGT8;F5H432;F5GXX3;F5H205;F5H637;F5H3X7;J3KPV0	B4E0T2;P50542-2;P50542;P50542-4;F5H5C0;P50542-3	Peroxisomal targeting signal 1 receptor	PEX5	+	+			122220	115590	284310	165000	271430	464840	287580	245580	4	4	4	8.9	8.9	8.9	73.182	0	5.718	3140200	1219.9	35	10	11	11	2	2
					D6R917;D6R9P4;D6RAY7;D6RB13;D6RFF8;D6RFK5;P46926;P46926-2;V9GYK3;V9GYW0	P46926-2	+	+	NDC80	NDC80	+	+			common -/+ PPase	Q8NBY1	Q8NBY1;B4E0Y9;Q9P289-2;Q9P289;Q9P289-3;C9JJV0	Q8NBY1;B4E0Y9;Q9P289-2;Q9P289;Q9P289-3	Serine/threonine-protein kinase 26	STK26	+	+			47219	59288	51740	53771	65809	71225	74511	66348	7	3	1	20.7	11.7	4.6	43.867	0	5.4756	2707900	73169	22	49	26	26	7	5
					P48147	P48147	+	+	NDC1	NDC1	+	+			common -/+ PPase	H0Y9V7	H0Y9V7;B4E2Q0;P98194-2;P98194-4;P98194;P98194-3;P98194-5;P98194-8;P98194-9;P98194-6;P98194-7;H0Y8X9;H0Y9S7	H0Y9V7;B4E2Q0;P98194-2;P98194-4;P98194;P98194-3;P98194-5;P98194-8;P98194-9;P98194-6;P98194-7	Calcium-transporting ATPase;Calcium-transporting ATPase type 2C member 1	ATP2C1	+	+			27872	23182	33036	23757	23213	21394	11017	19217	5	5	5	8.6	8.6	8.6	98.938	0	8.2642	733340	13568	40	13	16	16	4	2
					A0A494C0K9;H7C068;H7C086;H7C0C1;P48047	P48047	+	+	NCSTN	NCSTN	+	+			common -/+ PPase	B5MBZ0	B5MBZ0;Q9HC35-2;Q9HC35	B5MBZ0;Q9HC35-2;Q9HC35	Echinoderm microtubule-associated protein-like 4	EML4	+	+			29942	37261	34380	32584	30094	41447	25013	33894	7	7	7	12.7	12.7	12.7	110.18	0	19.918	861980	8720.4	50	21	19	19	4	3
					P0C7P4;P47985	P47985	+	+	NCOR1	NCOR1	+	+			common -/+ PPase	G5E9F5	G5E9F5;B5MC53;B5MCF8;P39210	G5E9F5;B5MC53;B5MCF8;P39210	Protein Mpv17	MPV17	+	+			3144.8	3704.9	6014.6	2220.1	34725	28995	34091	22697	2	2	2	21.2	21.2	21.2	12.958	0	11.787	453820	15473	4	13	7	7	1	1
					A0A0U1RQC3;A0A0U1RQE9;A0A0U1RQJ6;A0A0U1RQL2;A0A0U1RQM8;A0A0U1RQQ5;A0A0U1RQT0;A0A0U1RQU2;A0A0U1RQX5;A0A0U1RQX9;A0A0U1RR66;A0A0U1RR79;A0A0U1RRC8;A0A0U1RRI9;A0A0U1RRJ7;A0A1B0GTT3;A0A1B0GVU9;B4DDN1;C9J165;F2Z2V6;H7C0R3;P47897;P47897-2	P47897-2	+	+	NCOA5	NCOA5	+	+			common -/+ PPase	B5MCF9	B5MCF9;B3KXD6;O00541-2;O00541	B5MCF9;B3KXD6;O00541-2;O00541	Pescadillo homolog	PES1	+	+			48572	75336	92146	54177	65343	32189	72618	44429	3	3	3	7.7	7.7	7.7	66.077	0	7.3126	765940	25531	30	12	12	12	2	2
					H0Y2X5;H0YNQ3;P47895	P47895	+	+	NCLN	NCLN	+	+			common -/+ PPase	K7ELA4	K7ELA4;B5MD17;J3KS05;P83916	K7ELA4;B5MD17;J3KS05;P83916	Chromobox protein homolog 1	CBX1	+	+			346460	403710	561130	628880	559140	637360	548340	551370	2	1	1	15.9	15.9	15.9	15.981	0	11.312	9860400	1383400	5	33	8	8	2	2
					A6NJH9;O14602;P47813;X6RAC9	P47813	+	+	NCL	NCL	+	+			common -/+ PPase	B5MDF5	B5MDF5;P62826;J3KQE5;F5H018;H0YFC6;B4DV51;A0A087X0W0	B5MDF5;P62826;J3KQE5;F5H018;H0YFC6	GTP-binding nuclear protein Ran	RAN	+	+			2792800	2816000	3114200	3282000	2574100	2518000	2482600	2458500	15	15	15	44.6	44.6	44.6	26.224	0	154.33	64044000	2433800	10	132	47	47	11	10
					B1AK85;B1AK87;B1AK88;P47756;P47756-2	P47756-2	+	+	NAT10	NAT10	+	+			common -/+ PPase	Q99613	Q99613;B5ME19;Q99613-2;H3BPE4;H3BTY8;H3BPE3	Q99613;B5ME19;Q99613-2	Eukaryotic translation initiation factor 3 subunit C;Eukaryotic translation initiation factor 3 subunit C-like protein	EIF3C;EIF3CL	+	+			146240	145780	145900	150040	112910	129080	121430	144480	23	23	23	33	33	33	105.34	0	173.04	10420000	65308	42	146	74	74	17	17
					A0A087WWP1;A0A0J9YXZ5;E7EWC2;E9PDT6;F5H7S7;H0YLE8;P46940;Q13576;Q13576-2;Q13576-3	P46940	+	+	NAT1	NAT1	+	+			common -/+ PPase	E7EW69	E7EW69;E7EX04;B5ME97;Q9P0V9-3;Q9P0V9;Q9P0V9-2;F5H1F2;F5GYV2;C9JEW2;C9JNR7	E7EW69;E7EX04;B5ME97;Q9P0V9-3;Q9P0V9;Q9P0V9-2	Septin-10	2010-09-01	+	+			119170	139370	140130	116560	128360	128470	131280	132130	10	10	10	21.3	21.3	21.3	52.145	0	101.04	3873000	101480	22	54	28	28	6	8
					A0A0C4DH80;E9PI32;E9PN73;P46977;P46977-2	P46977	+	+	NABP2	NABP2	+	+			common -/+ PPase	B7WPG3	B7WPG3;C9IYN3;D6W592;Q8WVV9-5;Q8WVV9-4;Q8WVV9;H7C464	B7WPG3;C9IYN3;D6W592;Q8WVV9-5;Q8WVV9-4;Q8WVV9	Heterogeneous nuclear ribonucleoprotein L-like	HNRNPLL;HNRPLL	+	+			107210	131560	121470	107390	89499	95559	104420	83522	3	3	3	15.9	15.9	15.9	56.45	0	8.039	1705500	41578	29	10	9	9	2	2
					A0A0D9SET8;C9JUG7;F8W9N7;P47755;P47755-2	P47755	+	+	NAA50	NAA50	+	+			common -/+ PPase	B7Z2R7	B7Z2R7;Q5T8D3-4;Q5T8D3-2;Q5T8D3-3;Q5T8D3;X6RDD7;Q5T8E0	B7Z2R7;Q5T8D3-4;Q5T8D3-2;Q5T8D3-3;Q5T8D3	Acyl-CoA-binding domain-containing protein 5	ACBD5	+	+			34061	26672	27918	26061	33319	38520	28761	27355	4	4	4	11.3	11.3	11.3	58.792	0	14.608	587200	14746	26	12	9	9	1	2
					D6RA32;D6RA40;D6RCL2;D6RGJ3;P46821	P46821	+	+	NAA40	NAA40	+	+			common -/+ PPase	H7C2W9	H7C2W9;C9JU56;B7Z4E3;B7Z4C8;P62899-3;P62899;P62899-2;B8ZZK4	H7C2W9;C9JU56;B7Z4E3;B7Z4C8;P62899-3;P62899;P62899-2;B8ZZK4	60S ribosomal protein L31	RPL31	+	+			38102	42127	43324	54038	27900	31202	30723	29091	4	4	4	49.1	49.1	49.1	12.701	0	33.081	1301500	69598	6	32	16	16	3	3
					A0A024RCR6;A0A0G2JJM1;A0A0G2JJR8;A0A0G2JK23;A0A0G2JL47;A0A1B0GX79;F6S6P2;F6U1F2;F6U341;F6UR09;F6VEM6;F6WML8;F6X9W3;F6XTU0;H0Y4L1;H0Y710;P46379;P46379-2;P46379-3;P46379-4;P46379-5;X6REW1	P46379-5	+	+	NAA25	NAA25	+	+			common -/+ PPase	B7Z524	B7Z524;H0YDX7;J3QT46;Q9Y450-4;Q9Y450;H0YES5;E9PHZ9;E9PS53	B7Z524;H0YDX7;J3QT46;Q9Y450-4;Q9Y450	HBS1-like protein	HBS1L	+	+			25445	24824	30054	25628	19265	16648	19112	18374	5	5	5	19	19	19	56.961	0	11.662	735030	3414.4	30	18	19	19	3	3
					P46109	P46109	+	+	NAA15	NAA15	+	+			common -/+ PPase	B7Z6D5	B7Z6D5;Q96GQ7;A0A087X059;A0A087WYH5	B7Z6D5;Q96GQ7	Probable ATP-dependent RNA helicase DDX27	DDX27	+	+			88332	77583	91384	86122	73328	75365	79420	78738	15	15	14	24.7	24.7	23.9	86.604	0	29.883	3499800	54183	38	48	41	41	8	7
					P46108;P46108-2	P46108-2	+	+	NAA10	NAA10	+	+			common -/+ PPase	H7C148	H7C148;B7Z6J7;O75175;A0A0G2JNJ7;H7C3F5;A0A2H2FJL5;A0A2R8Y6N5;A0A2R8Y7Z8	H7C148;B7Z6J7;O75175;A0A0G2JNJ7;H7C3F5;A0A2H2FJL5	CCR4-NOT transcription complex subunit 3	CNOT3	+	+			47289	48235	46677	46982	32696	30478	35232	34367	3	3	3	6.2	6.2	6.2	48.956	0	7.1666	715450	62314	9	15	11	11	1	2
					F5GYR3;F5H5X6;P46087;P46087-2;P46087-3;P46087-4	P46087-4	+	+	MZT2A;MZT2B	MZT2B	+	+			common -/+ PPase	B7Z7Y1	B7Z7Y1;E9PCH4;Q8TEU7-2;Q8TEU7-5;Q8TEU7-3;Q8TEU7;Q8TEU7-4;D6RE77;Q8TEU7-6	B7Z7Y1;E9PCH4;Q8TEU7-2;Q8TEU7-5;Q8TEU7-3;Q8TEU7;Q8TEU7-4;D6RE77;Q8TEU7-6	Rap guanine nucleotide exchange factor 6	RAPGEF6	+	+			9574.2	11879	8962.7	6406.4	7664.3	7087.3	6877.1	7131.9	2	2	2	3.2	3.2	3.2	136.84	0.00076336	2.5143	118600	518.39	54	4	7	7	1	1
					F5GYB7;F5H2L2;F5H3W0;F5H4P4;F8WA66;F8WD97;P46063	P46063	+	+	MYOF	MYOF	+	+			common -/+ PPase	B7ZAX5	B7ZAX5;Q01415-2;Q01415;H0YLL3;H0YLL8;H0YK10	B7ZAX5;Q01415-2;Q01415	N-acetylgalactosamine kinase	GALK2	+	+			28769	33688	33556	30553	24003	22140	28777	19907	4	4	4	16.8	16.8	16.8	47.635	0	10.191	722460	25909	20	11	13	13	2	2
					B0QYT4;B0QYT5;B0QYT6;H0Y4Q3;P46060	P46060	+	+	MYO6	MYO6	+	+			common -/+ PPase	B7ZC38	B7ZC38;Q9NR46;Q9NR46-2;B7ZC39;F8WFB9;G5E9J1;H7C1Z6	B7ZC38;Q9NR46;Q9NR46-2;B7ZC39	Endophilin-B2	SH3GLB2	+	+			10188	11700	20820	27259	34744	41755	39223	43874	12	12	12	44	44	44	44.361	0	27.037	1347800	18955	18	35	27	27	3	5
					A0A0A0MR85;A0A3B3IRM5;B9ZVX7;E7EWW9;H3BQT3;H3BRM6;P09488;P09488-2;P46439;Q03013;Q03013-2;Q03013-3;Q5T8R1	P46439	+	+	MYO5A	MYO5A	+	+			common -/+ PPase	B7ZL14	B7ZL14;Q96RU3-4;Q96RU3-3;Q96RU3-5;Q96RU3-2;Q96RU3;H0Y7W6	B7ZL14;Q96RU3-4;Q96RU3-3;Q96RU3-5;Q96RU3-2;Q96RU3;H0Y7W6	Formin-binding protein 1	FNBP1	+	+			28382	25631	21815	18078	30623	32231	33078	35953	3	3	3	11.8	11.8	11.8	64.071	0	8.2012	430800	2010.4	27	12	10	10	3	1
					I3L0L3;I3L0N3;I3L2G1;K7EQD6;P46459;P46459-2	P46459	+	+	MYO1E	MYO1E	+	+			common -/+ PPase	B9A008	B9A008;E7ENR5;B8ZZ47;H0Y714;Q96G21	B9A008;E7ENR5;B8ZZ47;H0Y714;Q96G21	U3 small nucleolar ribonucleoprotein protein IMP4	IMP4	+	+			11352	20611	32900	29239	38510	32532	28446	25769	1	1	1	8.1	8.1	8.1	19.619	0.00029002	3.766	339900	37766	9	7	4	4	1	1
					A0A1W2PQS6;A0A2R8Y6L3;A0A2R8Y7H1;A0A2R8YFH6;F6U211;P46783;Q9NQ39;S4R435	P46783	+	+	NACA	NACA	+	+			common -/+ PPase	B8ZZ87	B8ZZ87;Q6NZ67;H7C293;H7BZ50;H7C173;A0A494C0V9;Q6P582	B8ZZ87;Q6NZ67;H7C293;H7BZ50;H7C173;A0A494C0V9;Q6P582	Mitotic-spindle organizing protein 2B;Mitotic-spindle organizing protein 2A	MZT2B;MZT2A	+	+			8775.5	8592.3	13184	14993	17094	16806	23192	23576	2	2	1	17.9	17.9	11.9	22.281	0	5.5424	273580	19194	10	8	6	6	1	1
					M0QZN2;M0R0F0;M0R0R2;P46782	P46782	+	+	NADK2	NADK2	+	+			common -/+ PPase	B8ZZ98	B8ZZ98;Q8WVK2	B8ZZ98;Q8WVK2	U4/U6.U5 small nuclear ribonucleoprotein 27 kDa protein	SNRNP27	+	+			20861	19859	21730	23972	19959	17868	19605	21053	2	2	2	19	19	19	19.438	0.0002963	4.0231	417830	29203	7	6	7	7	2	2
					A0A024R4M0;A8MXK4;B5MCT8;C9JM19;F2Z3C0;P46781	P46781	+	+	NASP	NASP	+	+			common -/+ PPase	B8ZZK2	B8ZZK2;O75223-2;O75223-4;O75223;H7BZK5	B8ZZK2;O75223-2;O75223-4;O75223;H7BZK5	Gamma-glutamylcyclotransferase	GGCT	+	+			8110.5	8918.1	8111.2	10582	17199	16813	15777	13716	2	2	2	24.1	24.1	24.1	18.398	0	5.5541	235230	21384	11	7	7	7	1	2
					H0YKD8;H0YLP6;H0YMF4;P46779;P46779-2;P46779-3;P46779-4;P46779-5	P46779-5	+	+	NARS	NARS	+	+			common -/+ PPase	B8ZZQ6	B8ZZQ6;P06454-2;P06454	B8ZZQ6;P06454-2;P06454	Prothymosin alpha;Prothymosin alpha, N-terminally processed;Thymosin alpha-1	PTMA	+	+			64430	13774	30261	28626	1033100	415090	1031100	879460	4	4	4	18.7	18.7	18.7	11.758	0	47.404	9269400	2989700	3	19	10	10	2	1
					G3V1B3;M0R181;M0R3I5;P46778	P46778	+	+	NAPRT	NAPRT	+	+			common -/+ PPase	H7C0I1	H7C0I1;B8ZZW5;Q8NBF6-2;Q8NBF6	H7C0I1;B8ZZW5;Q8NBF6-2;Q8NBF6	Late secretory pathway protein AVL9 homolog	AVL9	+	+			14730	14802	20459	14674	10814	7435.6	9564	12243	1	1	1	2.1	2.1	2.1	63.292	0.00052002	2.7359	143920	4797.4	30	4	4	4	1	1
					E9PRZ0;J3QR49;P46734;P46734-2;P46734-3	P46734	+	+	NAPG	NAPG	+	+			common -/+ PPase	F8W6C2	F8W6C2;B8ZZZ7;Q9NUQ6-2;Q9NUQ6;Q9NUQ6-4;Q9NUQ6-3	F8W6C2;B8ZZZ7;Q9NUQ6-2;Q9NUQ6;Q9NUQ6-4;Q9NUQ6-3	SPATS2-like protein	SPATS2L	+	+			40815	36090	30843	34357	29700	31600	30127	31815	2	2	2	7.9	7.9	7.9	29.939	0	18.574	564640	3067.8	15	12	8	8	1	1
					E9PJD9;E9PLL6;E9PLX7;P46776	P46776	+	+	NAP1L4	NAP1L4	+	+			common -/+ PPase	B9A041	B9A041;P40925-2;P40925;P40925-3;B8ZZ51;C9JF79;C9JRL4	B9A041;P40925-2;P40925;P40925-3;B8ZZ51	Malate dehydrogenase, cytoplasmic	MDH1	+	+			539640	615670	595960	631200	758970	776010	736160	754040	12	12	12	72.4	72.4	72.4	23.038	0	232.99	22816000	1118800	11	84	42	42	9	10
					A0A2R8Y4A2;A0A2R8Y6J3;P46777;Q5T7N0	P46777	+	+	NANS	NANS	+	+			common -/+ PPase	B9A062	B9A062;P13995;P13995-2;B8ZZU9	B9A062;P13995;P13995-2	Bifunctional methylenetetrahydrofolate dehydrogenase/cyclohydrolase, mitochondrial;NAD-dependent methylenetetrahydrofolate dehydrogenase;Methenyltetrahydrofolate cyclohydrolase	MTHFD2	+	+			123610	101580	123940	102880	151930	139090	148670	134890	7	7	7	51.8	51.8	51.8	23.867	0	16.945	3276300	159070	14	25	22	22	4	4
					H3BS70;P42126;P42126-2;Q96DC0	P42126-2	+	+	NAMPT	NAMPT	+	+			common -/+ PPase	B9A067	B9A067;Q16891-2;Q16891-4;Q16891;Q16891-3;C9J406;H7C463;A0A087WYS0;D6RAW4	B9A067;Q16891-2;Q16891-4;Q16891;Q16891-3;C9J406;H7C463	MICOS complex subunit MIC60	IMMT	+	+			186850	193190	174180	196860	156770	156770	161220	161190	25	25	25	45.1	45.1	45.1	78.973	0	306.61	14736000	68874	43	194	92	92	23	23
					G3V3F0;G3V5M3;H0YJF9;P36957;P36957-2;Q86SW4	P36957	+	+	NAGLU	NAGLU	+	+			common -/+ PPase	J3KMX2	J3KMX2;B9EGA3;Q92925-3;Q92925-2;Q92925;F8VW95;C9JYI7;F8VUB0;J3QWB6	J3KMX2;B9EGA3;Q92925-3;Q92925-2;Q92925;F8VW95;C9JYI7;F8VUB0	SWI/SNF-related matrix-associated actin-dependent regulator of chromatin subfamily D member 2	SMARCD2;SMARCD1;SMARCD3	+	+			51560	48406	51432	44990	41803	52784	47021	60975	4	4	2	12.1	12.1	7.9	52.238	0	13.048	1294000	12221	29	17	13	13	3	4
					I3L107;I3L2R7;I3L3Z3;I3L4F9;I3L4Z0;P36955	P36955	+	+	NAGK	NAGK	+	+			common -/+ PPase	B9ZVN9	B9ZVN9;O95602	B9ZVN9;O95602	DNA-directed RNA polymerase;DNA-directed RNA polymerase I subunit RPA1	POLR1A	+	+			23559	21841	17724	16276	10924	11602	9735.9	9297.7	2	2	2	1.7	1.7	1.7	187.81	0.00030722	4.5022	222210	681.76	92	10	8	8	1	1
					C9JLM5;P36952;P36952-2	P36952-2	+	+	NAGA	NAGA	+	+			common -/+ PPase	C9JD32	C9JD32;B9ZVP7;J3KT29;P62829	C9JD32;B9ZVP7;J3KT29;P62829	60S ribosomal protein L23	RPL23	+	+			115280	145970	209820	189800	154700	145230	159680	157450	6	6	6	51.6	51.6	51.6	9.6694	0	21.594	5837200	284090	5	52	21	21	5	5
					A0A140T8Y2;P36915;P36915-2	P36915-2	+	+	NAE1	NAE1	+	+			common -/+ PPase	C9IY40	C9IY40;Q5T653	C9IY40;Q5T653	39S ribosomal protein L2, mitochondrial	MRPL2	+	+			15868	17013	21594	21855	18332	14138	18698	12913	1	1	1	9.8	9.8	9.8	24.43	0	4.6485	200820	22313	9	8	4	4	1	1
					A0A087WYY5;F5H037;F5H1L6;F8VR82;F8VYE8;F8W0W8;F8WE71;P36873;P36873-2	P36873-2	+	+	NDUFA13	NDUFA13	+	+			common -/+ PPase	C9IYQ7	C9IYQ7;F8WCF5;F8WEL4;Q8NFH5-2;Q8NFH5;C9JIY9;C9JWU7	C9IYQ7;F8WCF5;F8WEL4;Q8NFH5-2;Q8NFH5;C9JIY9	Nucleoporin NUP53	NUP35	+	+			69825	80638	93625	65873	78238	55869	72249	78876	3	3	3	45.2	45.2	45.2	11.723	0	8.532	1197000	158420	7	13	8	8	1	2
					A0A3B3ITK7;P36871;P36871-2;P36871-3	P36871-3	+	+	NDUFA5	NDUFA5	+	+			common -/+ PPase	H7C2Q9	H7C2Q9;H7C0M1;C9IYT0;O60832-2;O60832	H7C2Q9;H7C0M1;C9IYT0;O60832-2;O60832	H/ACA ribonucleoprotein complex subunit 4	DKC1	+	+			32191	34779	26615	26508	23025	23080	23618	24649	3	3	3	27.2	27.2	27.2	19.06	0	5.8138	537480	48862	11	11	8	8	2	2
					K7EJE8;K7EKE6;K7EQF8;K7ER27;K7ER56;K7ERR6;P36776;P36776-2;P36776-3	P36776-3	+	+	NFKBIE	NFKBIE	+	+			common -/+ PPase	C9IZ04	C9IZ04;Q9NY27;F8WDK3;Q9NY27-3	C9IZ04;Q9NY27;F8WDK3;Q9NY27-3	Serine/threonine-protein phosphatase 4 regulatory subunit 2	PPP4R2	+	+			44200	46452	32465	32999	32359	28351	27736	29592	2	2	2	13.3	13.3	13.3	25.621	0	5.9888	660620	32558	12	14	8	8	2	1
					H3BM89;H3BTP7;H3BU31;P36578	P36578	+	+	NFKB2	NFKB2	+	+			common -/+ PPase	C9J0K5	C9J0K5;C9K098;C9JVV5;H7C5C7;C9J869;P16333	C9J0K5;C9K098;C9JVV5;H7C5C7;C9J869;P16333	Cytoplasmic protein NCK1	NCK1	+	+			10217	14634	15895	10340	13964	16322	13928	13738	1	1	1	16	16	16	8.845	0	5.4262	161570	40393	4	8	4	4	1	1
					P36959	P36959	+	+	NFKB1	NFKB1	+	+			common -/+ PPase	C9J164	C9J164;C9K0J5;Q70E73-5;Q70E73-2;Q70E73-8;Q70E73-7;Q70E73-4;Q70E73-3;Q70E73-9;Q70E73-6;Q70E73	C9J164;C9K0J5;Q70E73-5;Q70E73-2;Q70E73-8;Q70E73-7;Q70E73-4;Q70E73-3;Q70E73-9;Q70E73-6;Q70E73	Ras-associated and pleckstrin homology domains-containing protein 1	RAPH1	+	+			46235	45961	46222	55410	33973	17544	46335	35991	3	3	3	8.1	8.1	8.1	67.176	0	8.2122	923010	13375	25	22	11	11	3	3
					A0A1B0GUK8;H0Y6E7;H3BNC1;H3BR27;H3BT71;O75526;P38159;P38159-2;P38159-3;Q8N7X1;Q96E39	P38159-3	+	+	NFIC	NFIC	+	+			common -/+ PPase	C9JD73	C9JD73;C9J177;H7C003;Q15435-2;Q15435;B5MBZ8;Q15435-5;Q15435-4;Q15435-3	C9JD73;C9J177;H7C003;Q15435-2;Q15435;B5MBZ8;Q15435-5;Q15435-4;Q15435-3	Protein phosphatase 1 regulatory subunit 7	PPP1R7	+	+			54600	52028	64592	70161	89908	81247	89139	85033	7	7	7	37.2	37.2	37.2	32.39	0	63.879	2280700	70518	17	45	25	25	5	7
					M0QY67;P38117;P38117-2	P38117-2	+	+	NFATC2IP	NFATC2IP	+	+			common -/+ PPase	D6RBD7	D6RBD7;C9J1V9;O43324-2;O43324;H0YAL7;D6RCQ0	D6RBD7;C9J1V9;O43324-2;O43324;H0YAL7	Eukaryotic translation elongation factor 1 epsilon-1	EEF1E1;EEF1E1-BLOC1S5	+	+			204880	244480	211970	244050	386030	384180	393630	397130	3	3	3	30.7	30.7	30.7	16.686	0	27.945	4521300	411530	10	21	12	12	3	2
					F2Z393;P37837	P37837	+	+	NF2	NF2	+	+			common -/+ PPase	C9J2Y9	C9J2Y9;P30876;C9J4M6;A0A1W2PPT5;C9JMN3;C9JZW8	C9J2Y9;P30876;C9J4M6;A0A1W2PPT5	DNA-directed RNA polymerase;DNA-directed RNA polymerase II subunit RPB2	POLR2B	+	+			30102	28697	37343	37686	30081	31199	29233	27400	17	17	17	20.8	20.8	20.8	133.06	0	29.37	2898200	16566	60	80	58	58	11	13
					C9J5W6;P37802;P37802-2;Q9UI15;X6RJP6	P37802-2	+	+	NEU1	NEU1	+	+			common -/+ PPase	C9J316	C9J316;O95905-2;O95905;O95905-3;F2Z2R1	C9J316;O95905-2;O95905;O95905-3;F2Z2R1	Protein SGT1	ECD	+	+			33347	35210	19447	32971	36519	31814	31679	33139	2	2	2	17.5	17.5	17.5	24.219	0	5.6888	408760	3083.4	13	9	5	5	1	2
					A0A1W2PQ47;E9PJG4;E9PNM1;E9PS69;P37268;P37268-2;P37268-3;P37268-4;P37268-5	P37268-5	+	+	NES	NES	+	+			common -/+ PPase	C9J4Z3	C9J4Z3;P61513	C9J4Z3;P61513	60S ribosomal protein L37a	RPL37A	+	+			141000	127680	183730	179430	150110	155170	171850	191220	1	1	1	26.5	26.5	26.5	7.624	0	24.307	2278700	486360	4	13	4	4	1	1
					H0YLA2;P37108	P37108	+	+	NEO1	NEO1	+	+			common -/+ PPase	C9J5D1	C9J5D1;E7EQ69;Q9GZZ1;C9JZU6;A0A087WWJ2;Q9GZZ1-2;F8WCK0;C9J5J3;A0A0D9SF32;B0AZT5	C9J5D1;E7EQ69;Q9GZZ1;C9JZU6;A0A087WWJ2;Q9GZZ1-2	N-alpha-acetyltransferase 50	NAA50	+	+			33487	31939	34112	7987.1	53024	54534	60039	64050	3	3	3	37.2	37.2	37.2	14.886	0	10.951	931550	45004	8	13	6	6	1	1
					M0QXN5;P37198	P37198	+	+	NENF	NENF	+	+			common -/+ PPase	C9J5N1	C9J5N1;Q9BTE6;Q9BTE6-2;Q9BTE6-3;L7N2F4;K7EQ85;K7N799	C9J5N1;Q9BTE6;Q9BTE6-2;Q9BTE6-3;L7N2F4	Alanyl-tRNA editing protein Aarsd1	PTGES3L-AARSD1;AARSD1	+	+			34201	46219	33369	46198	38459	41874	43285	39851	5	5	5	16.2	16.2	16.2	55.065	0	12.122	908850	16021	23	10	14	14	2	3
					H0YA22;P36551;P36551-2	P36551-2	+	+	NELFE	NELFE	+	+			common -/+ PPase	C9J5X1	C9J5X1;P08069	C9J5X1;P08069	Tyrosine-protein kinase receptor;Insulin-like growth factor 1 receptor;Insulin-like growth factor 1 receptor alpha chain;Insulin-like growth factor 1 receptor beta chain	IGF1R	+	+			14537	11434	20801	16607	16571	12709	11242	11502	3	3	2	3.6	3.6	2.1	154.79	0.00028571	3.596	340090	2846.2	67	9	10	10	2	3
					A0A494C024;P35749;P35749-2;P35749-3;P35749-4	P35749	+	+	NELFCD;TH1L	NELFCD	+	+			common -/+ PPase	C9J8Q5	C9J8Q5;P51649;P51649-2	C9J8Q5;P51649;P51649-2	Succinate-semialdehyde dehydrogenase, mitochondrial	ALDH5A1	+	+			40088	40916	29562	23609	42301	41963	54088	47266	3	3	3	8.1	8.1	8.1	53.867	0	10.149	997320	9534	24	19	11	11	2	3
					A0A494C028;A0A494C198;B4DFG0;D6R9L5;D6RDA2;H0Y8X0;H0Y993;P35659;P35659-2	P35659-2	+	+	NFS1	NFS1	+	+			common -/+ PPase	C9JA28	C9JA28;Q9UNL2;Q9UNL2-2	C9JA28;Q9UNL2;Q9UNL2-2	Translocon-associated protein subunit gamma	SSR3	+	+			41202	39024	35978	45642	32207	35331	32480	34313	2	2	2	10.3	10.3	10.3	20.161	0	5.5372	707350	84236	5	13	8	8	2	2
					A0A0A0MSW3;A0A494C1F2;B7ZAV2;E9PKD2;H0Y837;H0YF36;P35658;P35658-2;P35658-3;P35658-4;P35658-5	P35658-5	+	+	NFYC	NFYC	+	+			common -/+ PPase	C9JAW5	C9JAW5;C9JNU6;Q9Y241;Q9Y241-2	C9JAW5;C9JNU6;Q9Y241	HIG1 domain family member 1A, mitochondrial	HIGD1A	+	+			26352	21786	25503	22626	73634	70243	47031	53982	3	3	2	51.8	51.8	48.2	8.8131	0	6.697	746790	186700	4	8	10	10	3	2
					H3BPE7;P35637;P35637-2	P35637-2	+	+	NLE1	NLE1	+	+			common -/+ PPase	C9JBI3	C9JBI3;P78330;A0A1D5RMN5;C9JEJ7;F8WD74	C9JBI3;P78330	Phosphoserine phosphatase	PSPH	+	+			18945	19229	29726	22010	30003	26380	18417	30542	6	6	5	42.8	42.8	39	20.745	0.00029806	4.0951	661390	38371	12	11	12	12	1	2
					E9PRV7;P25098;P35626;Q8N433	P35626	+	+	NKX2-1	NKX2-1	+	+			common -/+ PPase	C9JBL0	C9JBL0;E9PHV6;P23497-7;P23497-6;P23497-5;P23497-2;P23497-3;P23497;P23497-4	C9JBL0;E9PHV6;P23497-7;P23497-6;P23497-5;P23497-2;P23497-3;P23497;P23497-4	Nuclear autoantigen Sp-100	SP100	+	+			7677.1	7334.9	7180.1	7768.3	7156.3	10670	9242.8	11274	1	1	1	9.9	9.9	9.9	21.866	0.00027762	3.366	100520	8376.4	12	4	4	4	1	1
					A0A087WUV8;A0A087X2B5;A0A2R8YDZ0;I3L192;P35613;P35613-2;P35613-3;P35613-4;R4GMX5;R4GN83	P35613-4	+	+	NKRF	NKRF	+	+			common -/+ PPase	C9JEU5	C9JEU5;C9JC84;P02679-2;P02679;C9JPQ9;C9JU00	C9JEU5;C9JC84;P02679-2;P02679	Fibrinogen gamma chain	FGG	+	+			615510	665550	3873.7	7206.7	321.25	859.18	320.39	350.1	15	15	14	36.4	36.4	36.2	50.322	0	67.893	9485500	96084	27	45	10	10	15	15
					C9J8H1;P36543;P36543-2;P36543-3;Q96A05	P36543-3	+	+	NIT2	NIT2	+	+			common -/+ PPase	E9PNC7	E9PNC7;C9JCC6;Q14919;Q14919-2;E9PQX9	E9PNC7;C9JCC6;Q14919;Q14919-2;E9PQX9	Dr1-associated corepressor	DRAP1	+	+			41705	44630	44439	43867	37948	41291	44958	43270	3	3	3	21.3	21.3	21.3	16.561	0	14.849	1272400	113180	5	25	12	12	2	3
					P36542;P36542-2	P36542-2	+	+	NIT1	NIT1	+	+			common -/+ PPase	C9JTS3	C9JTS3;C9JG97;C9JEH3;Q13685	C9JTS3;C9JG97;C9JEH3;Q13685	Angio-associated migratory cell protein	AAMP	+	+			68707	89944	92706	103790	62460	67914	68494	61880	2	2	2	17.5	17.5	17.5	21.992	0	6.0326	1256000	95178	9	10	7	7	2	2
					A0A1B0GUL7;G5E9C7;P36507	P36507	+	+	NIPSNAP3A	NIPSNAP3A	+	+			common -/+ PPase	C9JEH7	C9JEH7;P22090	C9JEH7;P22090	40S ribosomal protein S4, Y isoform 1	RPS4Y1	+	+			40490	17894	76451	66178	48932	52382	53881	51565	7	3	2	36.3	19.5	14.5	29.383	0	13.57	2432500	1543.2	16	43	23	23	3	2
					P36405	P36405	+	+	NELFB	NELFB	+	+			common -/+ PPase	C9JEJ2	C9JEJ2;P49585;C9J050;Q9Y5K3-2;Q9Y5K3-4;Q9Y5K3-3;Q9Y5K3;H7C1T3;C9JVS0;C9JPY0;F8WAZ5;H7BZN1;F2Z2B1;C9J2E1	C9JEJ2;P49585;C9J050;Q9Y5K3-2;Q9Y5K3-4;Q9Y5K3-3;Q9Y5K3	Choline-phosphate cytidylyltransferase A;Choline-phosphate cytidylyltransferase B	PCYT1A;PCYT1B	+	+			18874	28380	63256	55487	68915	53190	58222	47986	5	5	5	15	15	15	43.263	0	5.5856	1271400	28539	24	16	15	15	3	3
					P36404;P36404-2;V9GYD0	P36404-2	+	+	NIPSNAP1	NIPSNAP1	+	+			common -/+ PPase	C9JEX3	C9JEX3;Q13614-2;Q13614	C9JEX3;Q13614-2;Q13614	Myotubularin-related protein 2	MTMR2	+	+			20698	18605	17840	17488	15445	15376	15901	16980	2	2	2	7.7	7.7	7.7	64.49	0	5.2057	310460	3950.3	29	11	8	8	1	2
					P35914;P35914-2;P35914-3	P35914	+	+	NIP7	NIP7	+	+			common -/+ PPase	C9JFR7	C9JFR7;P99999;CON__P62894	C9JFR7;P99999	Cytochrome c	CYCS	+	+			172290	167130	224640	233510	178440	194440	165560	181010	9	9	9	53.5	53.5	53.5	11.333	0	78.494	6831400	533040	6	77	36	36	9	8
					C9JLS9;P35998;P35998-2	P35998	+	+	NIFK	NIFK	+	+			common -/+ PPase	C9JG87	C9JG87;Q9NYK5;Q9NYK5-2	C9JG87;Q9NYK5;Q9NYK5-2	39S ribosomal protein L39, mitochondrial	MRPL39	+	+			129650	279280	140190	103320	103140	118160	119670	97369	5	5	5	19.5	19.5	19.5	34.032	0	17.57	2839900	103050	20	23	19	19	4	2
					A0A087WTB6;A0A087WZE5;A0A0A0MR13;A0A1W2PQK2;A0A1W2PRE1;A0A1W2PRJ7;A0A1W2PS82;A0A3B3IUA8;A2A2R6;A8MTJ3;H0Y7E8;H0Y7F4;K7EPE2;P11488;P19087;P38405;P38405-2;P63092;P63092-2;P63092-3;P63092-4;Q5JWD1;Q5JWE9;Q5JWF2;Q5JWF2-2;S4R3E3;S4R3V9	P38405	+	+	NIF3L1	NIF3L1	+	+			common -/+ PPase	C9JGI3	C9JGI3;P19971;A0A494C0L6;P19971-2;A0A494C1N7;A0A1W2PP80;A0A1W2PQK0;A0A494C1L9;A0A494BZZ4	C9JGI3;P19971;A0A494C0L6;P19971-2	Thymidine phosphorylase	TYMP	+	+			75364	80310	88093	75584	92413	90516	103080	102170	11	11	11	39.6	39.6	39.6	46.087	0	32.192	3876200	80366	23	53	36	36	8	6
					A0A087X270;P40938;P40938-2	P40938	+	+	NHP2L1	NHP2L1	+	+			common -/+ PPase	C9JIF9	C9JIF9;P13798;H7C393;H7C1U0;C9JLK2;F8WEH5	C9JIF9;P13798;H7C393	Acylamino-acid-releasing enzyme	APEH	+	+			151460	151850	164470	171340	111900	113030	114730	117650	12	12	12	28.2	28.2	28.2	81.673	0	146.48	6650700	171090	31	71	42	42	11	11
					C9JH72;E9PEP3;F5H0U6;F5H304;F5H5S0;P40937;P40937-2	P40937-2	+	+	NHLRC2	NHLRC2	+	+			common -/+ PPase	C9JJ19	C9JJ19;P82930	C9JJ19;P82930	28S ribosomal protein S34, mitochondrial	MRPS34	+	+			15568	17332	23896	18554	23243	30259	21851	17314	4	4	4	20.4	20.4	20.4	26.332	0	6.058	457640	21722	13	11	10	10	2	2
					G3XAL0;P40926;P40926-2	P40926-2	+	+	MYO1C	MYO1C	+	+			common -/+ PPase	C9JJ34	C9JJ34;F6WQW2;P43487-2;P43487;C9JXG8;C9JDM3;C9JGV6;C9JIC6	C9JJ34;F6WQW2;P43487-2;P43487;C9JXG8;C9JDM3;C9JGV6	Ran-specific GTPase-activating protein	RANBP1	+	+			185530	182040	198880	215800	190010	195390	167420	187600	6	6	6	42.9	42.9	42.9	18.762	0	63.997	8636800	448160	8	53	20	20	4	4
					B8ZZ51;B9A041;C9JF79;C9JRL4;P40925;P40925-2;P40925-3	P40925-3	+	+	NELFA	NELFA	+	+			common -/+ PPase	C9JT76	C9JT76;C9JQ14;C9JKV3;P10646-2;P10646	C9JT76;C9JQ14;C9JKV3;P10646-2;P10646	Tissue factor pathway inhibitor	TFPI	+	+			28699	27341	27120	16787	22494	22891	27848	29102	1	1	1	7.6	7.6	7.6	12.06	0.0026744	2.1009	293840	58767	5	8	4	4	1	1
					A0A075B720;H0YKV1;H0YLH2;H0YM47;H0YNL5;P40818;P40818-2	P40818-2	+	+	NDUFS3	NDUFS3	+	+			common -/+ PPase	C9JLF4	C9JLF4;Q9NVH0-2;Q9NVH0	C9JLF4;Q9NVH0-2;Q9NVH0	Exonuclease 3-5 domain-containing protein 2	EXD2	+	+			6636.9	7110.4	6741.2	8616.6	4183.6	4600	6850.4	7112.5	1	1	1	11.4	11.4	11.4	12.421	0.001271	2.5056	72608	10373	7	2	4	4	1	1
					G8JLH9;K7EP08;P40763;P40763-2;P40763-3	P40763-3	+	+	NDUFS2	NDUFS2	+	+			common -/+ PPase	C9JLM5	C9JLM5;P36952-2;P36952	C9JLM5;P36952-2;P36952	Serpin B5	SERPINB5	+	+			10918	9045	8743.3	7443	13548	14427	17824	16779	1	1	1	13.2	13.2	13.2	14.357	0	7.6318	151270	21609	7	6	4	4	1	1
					B4DZG7;F8VYN9;F8W1Z8;P40616;P40616-2	P40616-2	+	+	NDUFS1	NDUFS1	+	+			common -/+ PPase	F8WB86	F8WB86;Q6PJ80;C9JLR4;Q92575	F8WB86;Q6PJ80;C9JLR4;Q92575	UBX domain-containing protein 4	UBXN4	+	+			24075	32754	23853	28042	27931	30642	32582	34800	2	2	2	26.2	26.2	26.2	6.9849	0	10.43	694430	70054	3	15	8	8	1	2
					A0A2R8Y4F5;A0A2R8Y688;A0A2R8YG21;H0YFD6;P40939;P40939-2	P40939	+	+	NDUFB9	NDUFB9	+	+			common -/+ PPase	C9JLU1	C9JLU1;P52434;P52434-2;P52434-3;P52434-4;P52434-5	C9JLU1;P52434;P52434-2;P52434-3;P52434-4	DNA-directed RNA polymerases I, II, and III subunit RPABC3	POLR2H	+	+			23605	44560	51074	39107	104100	141460	114500	132550	4	4	4	32.4	32.4	32.4	16.925	0	15.983	1373900	134450	9	16	13	13	2	2
					P42025	P42025	+	+	NDUFB6	NDUFB6	+	+			common -/+ PPase	I3L2L5	I3L2L5;I3L4Q0;C9JLW8;I3L317;I3L3A7	I3L2L5;I3L4Q0;C9JLW8;I3L317	Protein FAM195B	FAM195B	+	+			30046	24621	27869	34847	31624	33003	29091	23937	3	3	3	43.5	43.5	43.5	10.463	0	6.5435	455540	56812	6	9	6	6	1	1
					P41743	P41743	+	+	NDUFB5	NDUFB5	+	+			common -/+ PPase	C9JMN1	C9JMN1;Q96SB8;Q96SB8-2;A0A0A0MRY1	C9JMN1;Q96SB8;Q96SB8-2;A0A0A0MRY1	Structural maintenance of chromosomes protein 6	SMC6	+	+			25539	21015	31579	17964	18414	14835	20429	21418	4	4	4	9.2	9.2	9.2	84.519	0	6.1286	433990	5335.1	44	8	11	11	2	1
					A0A0A0MSX9;J3KR24;P41252;Q5TCC6;Q5TCD1	P41252	+	+	NDUFB4	NDUFB4	+	+			common -/+ PPase	C9JT95	C9JT95;C9JMP5;Q9BQ15	C9JT95;C9JMP5;Q9BQ15	SOSS complex subunit B1	NABP2	+	+			10955	10231	14882	16448	17104	9005	18107	4395.6	3	3	3	39.6	39.6	39.6	15.57	0	9.1402	297120	4742.8	7	7	11	11	3	2
					F8WCK4;P41250	P41250	+	+	NDUFB3	NDUFB3	+	+			common -/+ PPase	C9JXB8	C9JXB8;C9JNW5;P83731	C9JXB8;C9JNW5;P83731	60S ribosomal protein L24	RPL24	+	+			442410	435420	535760	591530	340540	348700	379090	396620	5	5	5	29.8	29.8	29.8	14.369	0	81.785	8944300	1029200	7	61	18	18	4	4
					A8MWP7;C9JN83;C9JW55;F8W808;P41227;P41227-2	P41227-2	+	+	NDUFB10	NDUFB10	+	+			common -/+ PPase	C9JP16	C9JP16;O75718	C9JP16;O75718	Cartilage-associated protein	CRTAP	+	+			26914	28440	31493	35072	28831	31527	30953	32199	5	5	5	14.8	14.8	14.8	41.432	0	12.447	1052400	40075	23	28	17	17	5	3
					C9JCD9;F8WCN7;P41223;P41223-2	P41223-2	+	+	NDUFA9	NDUFA9	+	+			common -/+ PPase	C9JQ41	C9JQ41;H7C525;Q4VC31;C9JBU9	C9JQ41;H7C525;Q4VC31	Coiled-coil domain-containing protein 58	CCDC58	+	+			7549.4	5862.6	14049	16494	43372	34963	39761	20911	3	3	3	35.4	35.4	35.4	15.296	0	7.3485	613330	32975	7	8	7	7	2	2
					H7BZU1;P41091;Q2VIR3;Q2VIR3-2	P41091	+	+	NDUFA8	NDUFA8	+	+			common -/+ PPase	H7BYW5	H7BYW5;C9JSK5;P31321;K7EKR1	H7BYW5;C9JSK5;P31321;K7EKR1	cAMP-dependent protein kinase type I-beta regulatory subunit	PRKAR1B;PRKAR1A	+	+			37566	18606	36378	32657	36360	32118	26301	32354	4	1	1	16.1	5	5	26.937	0.0067678	1.7592	680440	41946	12	11	12	12	3	3
					P41214;P41214-2;Q5SY38	P41214	+	+	NDUFS5	NDUFS5	+	+			common -/+ PPase	C9JTN7	C9JTN7;F8W8I6;P31483-2;P31483;E5RGV5;E5RG67;P31483-3;F8WE16;H7BY49	C9JTN7;F8W8I6;P31483-2;P31483;E5RGV5;E5RG67;P31483-3	Nucleolysin TIA-1 isoform p40	TIA1	+	+			40904	30787	24458	41452	40575	36885	39111	40421	4	4	1	16.5	16.5	6.3	31.624	0	12.746	643320	45740	13	13	10	10	2	2
					A0A096LPE0;M0QYS1;M0QZU1;P40429;Q6NVV1;Q8J015	P40429	+	+	NDUFS6	NDUFS6	+	+			common -/+ PPase	C9JYM0	C9JYM0;O75817	C9JYM0;O75817	Ribonuclease P protein subunit p20	POP7	+	+			25536	22751	30563	27782	25528	23594	23929	28873	2	2	2	11.7	11.7	11.7	15.324	0	5.0582	352350	55416	5	9	4	4	2	2
					A0A1B0GTT5;A0A1B0GVG8;B0YJC4;B0YJC5;E7EMV2;E7ESP9;F8W835;H7C5W5;P07196;P07197;P07197-2;P08670;P12036;P12036-2;P41219;P41219-2;Q16352	P41219	+	+	NEK9	NEK9	+	+			common -/+ PPase	C9JYN0	C9JYN0;Q16563-2;A0A0U1RQT9;Q16563	C9JYN0;Q16563-2;A0A0U1RQT9;Q16563	Synaptophysin-like protein 1	SYPL1	+	+			18004	19890	19926	21239	17177	25724	24118	21879	2	2	2	12.9	12.9	12.9	24.784	0.00028506	3.5805	514400	33010	10	10	8	8	2	2
					P40425	P40425	+	+	NEK6;NEK7	NEK7	+	+			common -/+ PPase	D3YTB1	D3YTB1;F8W727;P62910	D3YTB1;F8W727;P62910	60S ribosomal protein L32	RPL32	+	+			47229	39007	79180	50143	48147	118050	83455	65371	3	3	3	25.6	25.6	25.6	15.616	0	6.0023	1814100	4946.6	7	18	8	8	1	2
					A0A2R8Y852;A0A2R8YDI1;P39880;P39880-2;P39880-3;P39880-4;P39880-5;P39880-6;P39880-9;Q13948;Q13948-10;Q13948-2;Q13948-9	P39880	+	+	NEDD8;NEDD8-MDP1	NEDD8-MDP1	+	+			common -/+ PPase	Q13557-10	Q13557-10;Q13557-5;E9PBG7;D6R938;E9PF82;Q13557-12;Q13557-9;Q13557-8;Q13557;Q13557-3;Q13557-6;Q13557-4;Q13557-11;Q9UQM7-2;Q9UQM7;H0Y9J2;E9PBE8;E7EQE4;H0Y9C2;D6RHX9	Q13557-10;Q13557-5;E9PBG7;D6R938;E9PF82;Q13557-12;Q13557-9;Q13557-8;Q13557;Q13557-3;Q13557-6;Q13557-4;Q13557-11	Calcium/calmodulin-dependent protein kinase type II subunit delta	CAMK2D	+	+			50789	51389	54001	60095	41413	49841	48843	54771	6	4	4	14.6	8.3	8.3	55.659	0	14.258	1662400	61433	25	30	20	20	6	5
					F5H1Y3;I3L3E9;P39748;P39748-2	P39748-2	+	+	NEDD4L	NEDD4L	+	+			common -/+ PPase	D6R9J9	D6R9J9;E7EM50;Q5H8A4-4;Q5H8A4-2;Q5H8A4;D6RD39;D6RFE8;E7EWV1;Q5H8A4-5;Q5H8A4-6;Q5H8A4-3	D6R9J9;E7EM50;Q5H8A4-4;Q5H8A4-2;Q5H8A4;D6RD39;D6RFE8;E7EWV1;Q5H8A4-5;Q5H8A4-6;Q5H8A4-3	GPI ethanolamine phosphate transferase 2	PIGG	+	+			10565	5078.1	13946	10524	5112.9	7075.1	10188	10331	2	2	2	13	13	13	20.969	0.0002949	3.9521	151670	12639	12	3	6	6	2	1
					H0YN26;H7BZ09;P39687	P39687	+	+	NEDD4	NEDD4	+	+			common -/+ PPase	D6R9P3	D6R9P3;D6RD18;D6RBZ0;Q99729-3;Q99729-2;Q99729-4;Q99729	D6R9P3;D6RD18;D6RBZ0;Q99729-3;Q99729-2;Q99729-4;Q99729	Heterogeneous nuclear ribonucleoprotein A/B	HNRNPAB	+	+			339250	345030	373820	384950	397030	385400	398840	401160	14	14	14	36.4	36.4	36.4	30.302	0	169.93	17934000	511460	13	91	46	46	9	10
					A0A0C4DGS1;P39656;P39656-2;P39656-3;U3KQ84	P39656-3	+	+	NEDD1	NEDD1	+	+			common -/+ PPase	D6R9P4	D6R9P4;D6RFF8;P46926;D6RAY7;P46926-2;D6RB13;D6R917;D6RFK5;V9GYW0;V9GYK3	D6R9P4;D6RFF8;P46926;D6RAY7;P46926-2;D6RB13	Glucosamine-6-phosphate isomerase;Glucosamine-6-phosphate isomerase 1	GNPDA1	+	+			74815	80182	88723	92918	86924	87196	81523	89060	8	8	6	49.3	49.3	37.6	30.9	0	39.871	3052000	100020	16	47	25	25	6	6
					B5MC53;B5MCF8;G5E9F5;P39210	P39210	+	+	NDUFV2	NDUFV2	+	+			common -/+ PPase	P57088	P57088;D6RAA6;H0Y8N0	P57088;D6RAA6	Transmembrane protein 33	TMEM33	+	+			49429	48664	48988	48757	48626	55265	45390	58764	3	3	3	13.8	13.8	13.8	27.978	0	8.5861	743360	61257	11	14	12	12	1	1
					B5MCW2;F8WCR1;G5E9G0;H7C3M2;H7C422;P39023	P39023	+	+	NDUFV1	NDUFV1	+	+			common -/+ PPase	D6RAJ6	D6RAJ6;Q9UKT5-2;Q9UKT5;D6REP2	D6RAJ6;Q9UKT5-2;Q9UKT5;D6REP2	F-box only protein 4	FBXO4	+	+			9076.6	8367.9	8934.1	10716	17310	11930	5316.9	15273	2	2	2	11.1	11.1	11.1	34.608	0	6.8062	191600	6077.2	16	4	8	8	1	1
					A0A075B6E2;M0QXK4;M0QYF7;M0R140;M0R2L9;P39019	P39019	+	+	NDUFS8	NDUFS8	+	+			common -/+ PPase	D6RAW2	D6RAW2;Q9BW91-2;Q9BW91;H7C386	D6RAW2;Q9BW91-2;Q9BW91;H7C386	ADP-ribose pyrophosphatase, mitochondrial	NUDT9	+	+			61307	76597	90839	68319	54026	57015	33629	62043	2	2	2	17	17	17	22.979	0	9.2263	785660	55895	12	6	5	5	2	2
					E9PBH4;F8WE11;I3L3H2;P38919	P38919	+	+	NDUFS7	NDUFS7	+	+			common -/+ PPase	D6RB59	D6RB59;O60645	D6RB59;O60645	Exocyst complex component 3	EXOC3	+	+			32397	29800	24433	28468	23914	22119	30361	28647	1	1	1	6.1	6.1	6.1	53.241	0	28.435	312760	11170	28	5	4	4	1	1
					A0A3B3ITI4;A0A3B3ITN1;D6RA73;D6RJI2;H0Y8S0;H0YBG6;P38646	P38646	+	+	MYO1B	MYO1B	+	+			common -/+ PPase	D6RB92	D6RB92;Q5JS54-3;Q5JS54;Q5JS54-2;D6REN3;E2QRC7;H7C465	D6RB92;Q5JS54-3;Q5JS54;Q5JS54-2;D6REN3;E2QRC7;H7C465	Proteasome assembly chaperone 4	PSMG4	+	+			11387	18356	29156	11335	45017	36804	39791	35951	4	4	4	67.6	67.6	67.6	11.655	0	13.248	760600	32044	7	19	11	11	3	3
					C9JA17;C9JVW8;F8WDJ3;P38606;P38606-2	P38606-2	+	+	ZYX	ZYX	+	+			common -/+ PPase	D6RBT3	D6RBT3;O75380	D6RBT3;O75380	NADH dehydrogenase [ubiquinone] iron-sulfur protein 6, mitochondrial	NDUFS6	+	+			23558	28470	27120	23863	22345	20333	20162	10246	1	1	1	14	14	14	18.751	0	7.1366	246670	30834	8	8	4	4	1	1
					P38432	P38432	+	+	MRPL4	MRPL4	+	+			common -/+ PPase	D6RBV2	D6RBV2;Q12907;D6RDX1;D6RIU4;D6RBH1	D6RBV2;Q12907;D6RDX1	Vesicular integral-membrane protein VIP36	LMAN2	+	+			73473	67393	80170	79404	99099	105380	101420	94268	6	6	6	37.2	37.2	37.2	36.543	0	204.65	4368900	24589	17	50	23	23	5	6
					P40261	P40261	+	+	MRPL39	MRPL39	+	+			common -/+ PPase	H0Y8J7	H0Y8J7;D6RBW1;P06730;P06730-3;P06730-2;D6RHE2;H0Y8X3;A6NMX2	H0Y8J7;D6RBW1;P06730;P06730-3;P06730-2	Eukaryotic translation initiation factor 4E	EIF4E	+	+			109020	121130	117790	119720	103960	105850	118690	117210	4	4	4	12.3	12.3	12.3	18.355	0	7.9483	3141900	327650	8	33	15	15	4	4
					P40227;P40227-2	P40227-2	+	+	MRPL38	MRPL38	+	+			common -/+ PPase	D6RCD0	D6RCD0;Q8NBQ5	D6RCD0;Q8NBQ5	Estradiol 17-beta-dehydrogenase 11	HSD17B11	+	+			27792	29945	25408	26774	33383	35174	35239	36586	4	4	4	25.8	25.8	25.8	28.102	0	10.885	1242500	53810	16	38	12	12	2	2
					P40222	P40222	+	+	MRPL37	MRPL37	+	+			common -/+ PPase	D6RD46	D6RD46;Q9UPQ0-10;Q9UPQ0-2;Q9UPQ0-4;Q9UPQ0;E7EPK0;E9PDJ9;H0Y8P3;G5EA03;Q9UPQ0-9;Q9UPQ0-8;Q9UPQ0-6;Q9UPQ0-5;Q9UPQ0-3	D6RD46;Q9UPQ0-10;Q9UPQ0-2;Q9UPQ0-4;Q9UPQ0;E7EPK0;E9PDJ9;H0Y8P3;G5EA03;Q9UPQ0-9;Q9UPQ0-8;Q9UPQ0-6;Q9UPQ0-5;Q9UPQ0-3	LIM and calponin homology domains-containing protein 1	LIMCH1	+	+			42491	49877	45076	37792	36898	36315	35574	34573	5	5	5	7.7	7.7	7.7	109.93	0	17.298	1047500	3550.6	55	27	17	17	4	3
					A0A494BZU0;D6RH03;P40189;P40189-2;P40189-3;Q5FC05	P40189-3	+	+	MRPL3	MRPL3	+	+			common -/+ PPase	D6RE00	D6RE00;Q9NYF3	D6RE00;Q9NYF3	Protein FAM53C	FAM53C	+	+			12540	11470	2941.8	18970	9644.6	9967.4	11441	11309	1	1	1	9.6	9.6	9.6	12.323	0	4.8856	122960	24592	5	7	4	4	1	1
					A0A087WZ15;A0A087X0J3;B7Z385;E9PDI2;F8WEW0;P40123;P40123-2	P40123-2	+	+	MRPL28	MRPL28	+	+			common -/+ PPase	D6REK3	D6REK3;Q6UX04-2;Q6UX04	D6REK3;Q6UX04-2;Q6UX04	Peptidyl-prolyl cis-trans isomerase CWC27 homolog	CWC27	+	+			26797	23448	29618	25857	32181	33528	27940	26725	3	3	3	18.6	18.6	18.6	42.996	0	5.7511	521490	8147.4	18	10	7	7	1	2
					B8ZZL6;E7ENU9;H7C0X8;P40121;P40121-2	P40121	+	+	MRPL24	MRPL24	+	+			common -/+ PPase	D6RGI3	D6RGI3;D6RER5;Q9NVA2;D6RDU5;Q9NVA2-2;D6RDP1;D6R9Y6	D6RGI3;D6RER5;Q9NVA2;D6RDU5;Q9NVA2-2;D6RDP1;D6R9Y6	Septin-11	2011-09-01	+	+			69799	91240	119620	120550	113240	127750	112380	107150	6	6	4	20.2	20.2	18.4	49.005	0	43.741	2760600	57034	21	23	17	17	4	3
					B4DJV5;Q13610	Q13610	+	+	MRPL23	MRPL23	+	+			common -/+ PPase	D6REW7	D6REW7;E7ESC7;Q7L5Y9;D6R8Z3;D6RA86;D6RE80;D6RDW4;D6RIB6;B4DQT1;B4DVN3;Q7L5Y9-5;Q7L5Y9-4;Q7L5Y9-3;Q7L5Y9-2	D6REW7;E7ESC7;Q7L5Y9;D6R8Z3;D6RA86;D6RE80;D6RDW4;D6RIB6;B4DQT1;B4DVN3;Q7L5Y9-5;Q7L5Y9-4;Q7L5Y9-3;Q7L5Y9-2	Macrophage erythroblast attacher	MAEA	+	+			19040	15612	15394	24739	19521	18350	20405	21259	2	2	2	14.6	14.6	14.6	30.402	0	5.2528	266950	13750	16	8	7	7	1	1
					H0YK42;H0YK43;Q13596;Q13596-2;Q13596-3	Q13596-3	+	+	MRPL21	MRPL21	+	+			common -/+ PPase	O94979-8	O94979-8;D6REX3;O94979;O94979-2;O94979-9;O94979-4;O94979-10;O94979-3;O94979-6;H7BXG7;O94979-7;D6RHZ5;O94979-5;H0YAB3;H0Y9K1;H0Y8V7;H0Y8W8;H0YAF5;D6RE64;H0Y9T9;D6RCQ9;H0Y9V3;D6RHE8;D6RBT0	O94979-8;D6REX3;O94979;O94979-2;O94979-9;O94979-4;O94979-10;O94979-3;O94979-6;H7BXG7;O94979-7;D6RHZ5;O94979-5	Protein transport protein Sec31A	SEC31A	+	+			92450	98171	104180	103310	82158	83637	87361	87965	18	18	17	18.9	18.9	17	134.5	0	45.361	6036700	71181	47	97	58	58	12	13
					Q13595;Q13595-2;Q13595-3;Q13595-4	Q13595-4	+	+	MRPL2	MRPL2	+	+			common -/+ PPase	Q9P2W9	Q9P2W9;D6RF48;D6RC71	Q9P2W9;D6RF48;D6RC71	Syntaxin-18	STX18	+	+			46838	42203	51892	53875	39971	36400	39741	39494	5	5	5	14.6	14.6	14.6	38.673	0	17.411	1322400	26218	20	26	20	20	5	5
					G3V3A4;G3V4X8;G3V5R3;Q13573	Q13573	+	+	MRPL19	MRPL19	+	+			common -/+ PPase	D6RFH4	D6RFH4;H3BUX2;O43169;J3QR91	D6RFH4;H3BUX2;O43169	Cytochrome b5 type B	CYB5B	+	+			117680	172470	246140	220910	271540	260580	228070	185870	3	3	3	38.9	38.9	38.9	14.846	0	62.987	5676900	45928	5	37	12	12	3	3
					G3V3C0;G3V4M9;G3V588;G3V5A3;Q13572;Q13572-2	Q13572-2	+	+	MRPL41	MRPL41	+	+			common -/+ PPase	D6RFM5	D6RFM5;P31040;A0A494C1T6;A0A087X1I3;P31040-3;P31040-2;H0Y8X1	D6RFM5;P31040;A0A494C1T6;A0A087X1I3;P31040-3;P31040-2	Succinate dehydrogenase [ubiquinone] flavoprotein subunit, mitochondrial	SDHA	+	+			473020	386790	422340	319340	417690	421050	457020	462970	8	8	8	26.4	26.4	26.4	63.566	0	122.4	10936000	174070	29	58	28	28	4	7
					H3BMR3;H3BQW6;J3KRK3;J3QLH4;J3QRA5;Q13564;Q13564-2;Q13564-3;Q13564-4	Q13564-4	+	+	MRPL16	MRPL16	+	+			common -/+ PPase	D6RFN0	D6RFN0;Q9BT78;D6RD63;D6RAX7;Q9BT78-2	D6RFN0;Q9BT78;D6RD63;D6RAX7;Q9BT78-2	COP9 signalosome complex subunit 4	COPS4	+	+			19960	21417	27458	27593	55753	60830	61647	59332	6	6	6	21.5	21.5	21.5	49.684	0	34.354	2079200	40793	26	33	23	23	6	5
					C9JEX3;Q13614;Q13614-2	Q13614	+	+	MRPL44	MRPL44	+	+			common -/+ PPase	D6RFW1	D6RFW1;Q96EQ0	D6RFW1;Q96EQ0	Small glutamine-rich tetratricopeptide repeat-containing protein beta	SGTB	+	+			26460	25736	22805	35225	22051	19661	24662	25960	1	1	1	10.3	10.3	10.3	21.83	0	15.542	345390	5522.1	11	9	4	4	1	1
					Q13641	Q13641	+	+	MRPL45	MRPL45	+	+			common -/+ PPase	D6RHW1	D6RHW1;D6RIY1;D6RGK3;D6RIV9;D6RIE8;Q9HBM6;Q16594	D6RHW1;D6RIY1;D6RGK3;D6RIV9;D6RIE8;Q9HBM6;Q16594	Transcription initiation factor TFIID subunit 9B;Transcription initiation factor TFIID subunit 9	TAF9;TAF9B	+	+			39185	41033	58460	59825	43547	37874	43723	37915	1	1	1	10.8	10.8	10.8	11.57	0.00076355	2.5145	515580	64448	8	8	4	4	1	1
					J3QR51;Q13636	Q13636	+	+	MRPS23	MRPS23	+	+			common -/+ PPase	D6RGW0	D6RGW0;Q6P179-3;Q6P179;Q6P179-4;Q6P179-2	D6RGW0;Q6P179-3;Q6P179	Endoplasmic reticulum aminopeptidase 2	ERAP2	+	+			39932	43269	50005	53120	39238	38969	46900	44936	7	7	7	14.1	14.1	14.1	79.731	0	15.371	1328500	22219	39	32	25	25	5	6
					A0A0J9YX13;E9PKL9;E9PLH9;E9PP14;E9PP60;H0YCP7;H0YE90;Q13630	Q13630	+	+	MRPS22	MRPS22	+	+			common -/+ PPase	D6RGZ2	D6RGZ2;Q96J01-2;Q96J01	D6RGZ2;Q96J01-2;Q96J01	THO complex subunit 3	THOC3	+	+			64269	76706	81032	90878	56498	59275	59601	52170	2	2	2	27.6	27.6	27.6	11.062	0.00030581	4.4084	1184900	115580	6	11	7	7	2	2
					A6NE76;K4DI93;Q13620;Q13620-1;Q13620-3	Q13620-3	+	+	MRPS2	MRPS2	+	+			common -/+ PPase	D6RIY6	D6RIY6;Q06265-3;Q06265-4;Q06265;Q06265-2;H0Y9L5;D6R905;D6RA17	D6RIY6;Q06265-3;Q06265-4;Q06265;Q06265-2;H0Y9L5;D6R905	Exosome complex component RRP45	EXOSC9	+	+			18464	31881	39506	40040	21936	24861	22709	21730	3	3	3	7.8	7.8	7.8	46.977	0	5.9546	721090	45068	16	14	12	12	3	2
					A0A087WWN2;A0A0A0MR50;Q13619;Q13619-2	Q13619-2	+	+	hCG_1984214;MRPS17	MRPS17	+	+			common -/+ PPase	K7ENX8	K7ENX8;K7EJV5;K7ELT6;K7EJV1;K7EMY9;K7EPM4;K7ER40;K7EQR7;D6W5Y5;Q14011;Q14011-2;K7ELV6;K7EQX4;K7ENN6;K7EIF7;K7EQL0	K7ENX8;K7EJV5;K7ELT6;K7EJV1;K7EMY9;K7EPM4;K7ER40;K7EQR7;D6W5Y5;Q14011;Q14011-2;K7ELV6	Cold-inducible RNA-binding protein	CIRBP	+	+			206950	206780	217050	229300	134270	153490	138390	158370	6	6	6	86.2	86.2	86.2	8.9138	0	272.93	6430200	246320	5	57	21	21	5	5
					A0A0C4DGX4;Q13616	Q13616	+	+	MRPL55	MRPL55	+	+			common -/+ PPase	E2QRK7	E2QRK7;H0Y4D6;Q5JTD0-4;Q5JTD0-2;Q5JTD0	E2QRK7;H0Y4D6;Q5JTD0-4;Q5JTD0-2;Q5JTD0	Tight junction-associated protein 1	TJAP1	+	+			8494.9	12784	12153	14518	7684	9466.2	13757	13999	2	2	2	19.2	19.2	19.2	22.815	0.00029727	4.0688	169900	3928.9	11	10	5	5	1	1
					A0A0A0MTN0;Q13617;Q13617-2;Q5T2B5;Q5T2B7	Q13617	+	+	MRPL53	MRPL53	+	+			common -/+ PPase	E3W994	E3W994;J3KR49;O75122;A0A0U1RQI6;E7ERI8;E7EW49;O75122-3;B3KR06;E7ENG2;O75122-2	E3W994;J3KR49;O75122;A0A0U1RQI6;E7ERI8;E7EW49;O75122-3	CLIP-associating protein 2	CLASP2	+	+			10446	8971.8	10979	10866	13063	13059	10467	10754	4	3	3	5.3	4.4	4.4	138.86	0	8.9579	281870	2087.3	75	10	8	8	2	3
					A0A087WTG3;Q13618;Q13618-2;Q13618-3	Q13618	+	+	MRPL52	MRPL52	+	+			common -/+ PPase	E5RFU2	E5RFU2;P34913-3;P34913-2;P34913;E5RFH6	E5RFU2;P34913-3;P34913-2;P34913;E5RFH6	Bifunctional epoxide hydrolase 2;Cytosolic epoxide hydrolase 2;Lipid-phosphate phosphatase	EPHX2	+	+			17538	20371	16670	21130	16531	13381	15922	13385	2	2	2	7.1	7.1	7.1	58.855	0	6.0719	214240	6911.1	31	9	6	6	1	1
					E9PNR2;Q13671;Q13671-2	Q13671	+	+	MRPL49	MRPL49	+	+			common -/+ PPase	E5RG77	E5RG77;O94903;E5RFX7;E5RFZ4;H0YBG2	E5RG77;O94903;E5RFX7	Proline synthase co-transcribed bacterial homolog protein	PROSC	+	+			25107	17985	16543	30563	42795	47118	47829	51972	3	3	3	30.3	30.3	30.3	16.995	0	19.231	1005900	72470	10	21	12	12	3	2
					A0A2Q3DQE3;H0Y6G2;H7BZC6;Q13554;Q13554-2;Q13554-3;Q13554-4;Q13554-5;Q13554-6;Q13554-7;Q13554-8;Q13555;Q13555-10;Q13555-11;Q13555-2;Q13555-3;Q13555-4;Q13555-5;Q13555-6;Q13555-7;Q13555-8;Q13555-9;Q5SWX3;Q8WU40	Q13555-5	+	+	MRPL48	MRPL48	+	+			common -/+ PPase	Q49A68	Q49A68;E5RGT2;Q96MH6-2;Q96MH6	Q49A68;E5RGT2;Q96MH6-2;Q96MH6	Transmembrane protein 68	TMEM68	+	+			18645	16359	28498	12217	23262	22240	21169	18094	2	2	2	15.4	15.4	15.4	10.664	0.0003046	4.3733	300420	41585	5	10	8	8	2	2
					F8VRV7;F8VW18;F8VX93;F8W0U6;F8W1I6;H0YHL1;H0YI98;Q13561;Q13561-2;Q13561-3	Q13561-3	+	+	MRPL47	MRPL47	+	+			common -/+ PPase	E5RIW3	E5RIW3;E5RJD8;E5RHG6;O75347;O75347-2;E5RIX8	E5RIW3;E5RJD8;E5RHG6;O75347;O75347-2	Tubulin-specific chaperone A	TBCA	+	+			92449	95321	152850	173830	278880	315790	292880	332190	4	4	4	46.4	46.4	46.4	10.08	0	76.95	7481200	588010	6	36	15	15	4	4
					D6R938;D6RHX9;E7EQE4;E9PBE8;E9PBG7;E9PF82;H0Y9C2;H0Y9J2;Q13557;Q13557-10;Q13557-11;Q13557-12;Q13557-3;Q13557-4;Q13557-5;Q13557-6;Q13557-8;Q13557-9;Q9UQM7;Q9UQM7-2	Q13557-9	+	+	MRPL46	MRPL46	+	+			common -/+ PPase	E5RHG8	E5RHG8;Q15369-2;Q15369;R4GMY8	E5RHG8;Q15369-2;Q15369	Transcription elongation factor B polypeptide 1	TCEB1	+	+			127230	86865	72100	31717	184300	96741	184670	136420	3	3	3	47.2	47.2	47.2	9.9601	0	66.451	4139900	221230	7	35	11	11	3	3
					Q13547;Q5TEE2	Q13547	+	+	MRPL15	MRPL15	+	+			common -/+ PPase	E5RI98	E5RI98	E5RI98		NPM1	+	+			3192000	2968400	2100500	2577200	1565800	1746700	1617400	1839500	2	1	1	32.4	13.5	13.5	11.865	0.00028337	3.5369	31025000	4241900	6	22	7	7	1	1
					D6RAF8;D6RBQ9;D6RD83;D6RF44;H0Y8G5;H0YA96;Q14103;Q14103-2;Q14103-3;Q14103-4	Q14103-4	+	+	MPG	MPG	+	+			common -/+ PPase	E5RI99	E5RI99;P62888;A0A0B4J213;E5RJH3;A0A0C4DH44	E5RI99;P62888	60S ribosomal protein L30	RPL30	+	+			101910	103880	110610	121630	123350	125600	128750	124710	6	6	6	63.2	63.2	63.2	12.656	0	28.753	5131200	658870	6	45	17	17	5	4
					H3BT58;Q14019	Q14019	+	+	MORC3	MORC3	+	+			common -/+ PPase	E5RIT6	E5RIT6;Q9UNX3;P61254;J3QRI7;J3QQQ9;J3QQV1;E5RHH1;J3KSS0;J3QRC4;J3KS10	E5RIT6;Q9UNX3;P61254;J3QRI7;J3QQQ9;J3QQV1;E5RHH1;J3KSS0;J3QRC4	60S ribosomal protein L26-like 1;60S ribosomal protein L26	RPL26L1;RPL26	+	+			108970	108230	143330	138280	114020	111680	118940	119430	6	6	6	41.4	41.4	41.4	15.207	0	15.124	5041400	522230	6	49	19	19	4	4
					D6W5Y5;K7EIF7;K7EJV1;K7EJV5;K7ELT6;K7ELV6;K7EMY9;K7ENN6;K7ENX8;K7EPM4;K7EQL0;K7EQR7;K7EQX4;K7ER40;Q14011;Q14011-2	Q14011-2	+	+	MON2	MON2	+	+			common -/+ PPase	Q7L5N1	Q7L5N1;E7EM64;H7C3T0	Q7L5N1;E7EM64	COP9 signalosome complex subunit 6	COPS6	+	+			52058	47159	51303	50718	51509	60735	49516	51859	3	3	3	17.4	17.4	17.4	36.163	0	16.737	1862000	29279	12	36	12	12	3	3
					E9PQH5;H0YDX5;Q14008;Q14008-2;Q14008-3	Q14008-3	+	+	MOGS	MOGS	+	+			common -/+ PPase	J3QLD9	J3QLD9;E7EMK3;Q14254;K7EKW9	J3QLD9;E7EMK3;Q14254	Flotillin-2	FLOT2	+	+			91160	98332	86771	92017	86889	89858	88688	83002	14	14	14	45.3	45.3	45.3	47.142	0	104.82	6157700	40467	26	106	54	54	12	12
					A0A087X209;A0A2R8Y4Z0;A0A2R8Y644;A0A2R8Y7W5;A0A2R8YD28;A0A2R8YEB7;A0A2R8YF61;Q14004;Q14004-2;Q9BVE2	Q14004-2	+	+	MOCS3	MOCS3	+	+			common -/+ PPase	E7EMW7	E7EMW7;O95071-2;O95071;E5RFK7;H0YBB4;H0YAV7	E7EMW7;O95071-2;O95071	E3 ubiquitin-protein ligase UBR5	UBR5	+	+			23649	19810	23101	23123	17263	15774	15459	16283	6	6	6	4.4	4.4	4.4	308.57	0	12.11	612900	1433	130	24	17	17	3	4
[truncated: 3,292 more rows]
[truncated: 32 more columns]

## Sheet: 08-MQ settings and summary.txt
Parameter	Value			Raw file	Experiment	Fraction	Enzyme	Enzyme mode	Enzyme first search	Enzyme mode first search	Use enzyme first search	Variable modifications	Fixed modifications	Multi modifications	Variable modifications first search	Use variable modifications first search	Requantify	Multiplicity	Max. missed cleavages	Labels0	LC-MS run type	Time-dependent recalibration	MS	MS/MS	MS3	MS/MS submitted	MS/MS submitted (SIL)	MS/MS submitted (ISO)	MS/MS submitted (PEAK)	MS/MS identified	MS/MS identified (SIL)	MS/MS identified (ISO)	MS/MS identified (PEAK)	MS/MS identified [%]	MS/MS identified (SIL) [%]	MS/MS identified (ISO) [%]	MS/MS identified (PEAK) [%]	Peptide sequences identified	Peaks	Peaks sequenced	Peaks sequenced [%]	Peaks repeatedly sequenced	Peaks repeatedly sequenced [%]	Isotope patterns	Isotope patterns sequenced	Isotope patterns sequenced (z>1)	Isotope patterns sequenced [%]	Isotope patterns sequenced (z>1) [%]	Isotope patterns repeatedly sequenced
[truncated: 109 more rows]
[truncated: 7 more columns]
